# Supplementary material for: HAT cofactor TRRAP modulates microtubule dynamics via SP1 signaling to prevent neurodegeneration
Source: eLife. 2021 Feb 17;10:e61531. doi: 10.7554/eLife.61531 (PMC7939550; doi:10.7554/eLife.61531)
Supplement: Supplementary file 1. — The list includes the DEGs in Trrap-FBΔ cortices (A), Trrap-FBΔ striata (B), and Trrap-deleted aNSCs (C). The list also includes comparisons between Trrap-FBΔ cortices and striata (D) and Trrap-FBΔ cortices, striata, and Trrap-deleted aNSCs (E). Moreover, it includes the GO (F) and KEGG (G) terms obtained from the list in (D), statistical information, and the list of genes in each group. [file elife-61531-supp1.xlsx]

## Sheet: A-Significant cortex
	baseMean	MUT.Mean	CTRL.Mean	log2FoldChange	lfcSE	stat	pvalue	padj	symbol	biotype
ENSMUSG00000021303	5455.27	3460.36	7450.18	-1.055	0.0554241	-18.6616	1.01674e-77	1.92173e-73	Gng4	protein_coding
ENSMUSG00000079657	1374.43	2010.61	738.258	1.38402	0.0840094	16.1909	5.85013e-59	5.52866e-55	Rab26	protein_coding
ENSMUSG00000001525	33423.7	18802.7	48044.6	-1.29602	0.0815341	-15.6135	5.89495e-55	3.71402e-51	Tubb5	protein_coding
ENSMUSG00000027500	44873	29328.2	60417.8	-1.01971	0.0711721	-14.1553	1.73123e-45	8.18052e-42	Stmn2	protein_coding
ENSMUSG00000020415	207.779	76.6788	338.88	-1.86074	0.126492	-14.0337	9.69476e-45	2.61772e-41	Pttg1	protein_coding
ENSMUSG00000024186	2446.38	1599.07	3293.68	-1.01112	0.0708858	-14.0427	8.5448e-45	2.61772e-41	Rgs11	protein_coding
ENSMUSG00000030792	257.396	106.881	407.912	-1.72332	0.118949	-14.0362	9.35489e-45	2.61772e-41	Dkkl1	protein_coding
ENSMUSG00000014846	1027.1	577.475	1476.72	-1.29178	0.0914493	-13.9699	2.3782e-44	5.61878e-41	Tppp3	protein_coding
ENSMUSG00000020953	1073.74	714.058	1433.42	-0.977066	0.0690099	-13.9187	4.87699e-44	1.02422e-40	Coch	protein_coding
ENSMUSG00000022054	6409.75	4140.17	8679.32	-1.02551	0.0723194	-13.9031	6.06208e-44	1.14579e-40	Nefm	protein_coding
ENSMUSG00000109890	388.323	607.315	169.331	1.65077	0.117046	13.5792	5.31831e-42	9.1383e-39	AU023762
ENSMUSG00000031328	9543.3	6393.5	12693.1	-0.956627	0.0693246	-13.5646	6.49262e-42	1.02264e-38	Flna	protein_coding
ENSMUSG00000047139	4404.79	2379.41	6430.17	-1.35347	0.099064	-13.506	1.44175e-41	2.09619e-38	Cd24a	protein_coding
ENSMUSG00000097451	33837.5	25292.5	42382.5	-0.734558	0.0541214	-13.4289	4.09307e-41	5.52594e-38		processed_transcript
ENSMUSG00000062380	19174	11130.8	27217.3	-1.22403	0.0909535	-13.2471	4.69257e-40	5.91295e-37	Tubb3	protein_coding
ENSMUSG00000020396	1550.46	883.722	2217.19	-1.23348	0.0925493	-12.9052	4.2095e-38	4.97274e-35	Nefh	protein_coding
ENSMUSG00000028337	1661.18	1101.14	2221.23	-0.985091	0.0756097	-12.8661	6.98508e-38	7.76618e-35	Coro2a	protein_coding
ENSMUSG00000046613	3173.48	2167.4	4179.56	-0.915142	0.07102	-12.669	8.77807e-37	9.21746e-34	Vwa5b2	protein_coding
ENSMUSG00000079523	1991.53	1243.71	2739.35	-1.10271	0.0866909	-12.6441	1.20614e-36	1.19985e-33	Tmsb10	protein_coding
ENSMUSG00000041073	2322.63	1562.02	3083.24	-0.945585	0.0737361	-12.6056	1.96744e-36	1.85933e-33	Nacad	protein_coding
ENSMUSG00000028197	888.893	531.866	1245.92	-1.13821	0.0869347	-12.589	2.42745e-36	2.18482e-33	Col24a1	protein_coding
ENSMUSG00000021196	20478.2	14121	26835.3	-0.90504	0.0710528	-12.5834	2.60409e-36	2.23727e-33	Pfkp	protein_coding
ENSMUSG00000030782	763.685	503.02	1024.35	-0.983163	0.0798774	-12.065	1.61567e-33	1.32773e-30	Tgfb1i1	protein_coding
ENSMUSG00000006356	3562.75	2497.91	4627.6	-0.861369	0.0711752	-11.9133	1.00881e-32	7.9448e-30	Crip2	protein_coding
ENSMUSG00000033460	2256.25	1725.88	2786.61	-0.675035	0.057532	-11.5622	6.40453e-31	4.84208e-28	Armcx1	protein_coding
ENSMUSG00000011256	2235.14	1637.43	2832.85	-0.770095	0.0660547	-11.4792	1.67902e-30	1.22059e-27	Adam19	protein_coding
ENSMUSG00000047261	21690.2	14711.5	28668.9	-0.926957	0.0798961	-11.4188	3.36849e-30	2.35807e-27	Gap43	protein_coding
ENSMUSG00000024981	2765.61	2117.33	3413.89	-0.674006	0.0587441	-11.3159	1.09424e-29	7.38651e-27	Acsl5	protein_coding
ENSMUSG00000030303	1967.13	1470.33	2463.92	-0.730662	0.0639561	-11.2722	1.79975e-29	1.173e-26	Far2	protein_coding
ENSMUSG00000027397	5203.13	4103.98	6302.28	-0.60247	0.0527597	-11.2615	2.03211e-29	1.2803e-26	Slc20a1	protein_coding
ENSMUSG00000071658	7374.15	5633.2	9115.09	-0.681715	0.0598343	-11.2573	2.13263e-29	1.30029e-26	Gng3	protein_coding
ENSMUSG00000021814	2177.33	1598.21	2756.46	-0.757456	0.0663349	-11.199	4.1233e-29	2.43545e-26	Anxa7	protein_coding
ENSMUSG00000097767	30018	22192.3	37843.8	-0.750871	0.0661531	-11.1907	4.52893e-29	2.59398e-26	Miat	lincRNA
ENSMUSG00000093930	30840	23406.3	38273.8	-0.709857	0.0631492	-11.1772	5.27403e-29	2.93189e-26	Hmgcs1	protein_coding
ENSMUSG00000040536	9453	7061.41	11844.6	-0.74029	0.0658057	-11.1573	6.59709e-29	3.56262e-26	Necab1	protein_coding
ENSMUSG00000031750	1311.75	941.859	1681.64	-0.80002	0.0707678	-11.0441	2.34121e-28	1.2292e-25	Il34	protein_coding
ENSMUSG00000029580	22677	17233.8	28120.2	-0.674277	0.0600744	-10.9941	4.0802e-28	2.07615e-25	Actb	protein_coding
ENSMUSG00000050248	425.489	591.202	259.776	1.10551	0.0977241	10.992	4.17405e-28	2.07615e-25	Evc2	protein_coding
ENSMUSG00000028051	1069.2	720.269	1418.13	-0.936465	0.08482	-10.8835	1.38081e-27	6.69199e-25	Hcn3	protein_coding
ENSMUSG00000032024	2261.67	1565.48	2957.86	-0.881556	0.0800953	-10.8109	3.05809e-27	1.44502e-24	Clmp	protein_coding
ENSMUSG00000057561	1597.23	1230.4	1964.06	-0.66917	0.0615407	-10.7686	4.84426e-27	2.23321e-24	Eif1a	protein_coding
ENSMUSG00000027716	1065.43	793.451	1337.41	-0.751491	0.0694716	-10.7652	5.02616e-27	2.26189e-24	Trpc3	protein_coding
ENSMUSG00000000184	5365.05	4251.13	6478.97	-0.588618	0.0545991	-10.6149	2.542e-26	1.11736e-23	Ccnd2	protein_coding
ENSMUSG00000032249	5481.03	4303.71	6658.35	-0.616475	0.0574281	-10.5952	3.13542e-26	1.34688e-23	Anp32a	protein_coding
ENSMUSG00000033392	18071.4	15034.2	21108.5	-0.496512	0.0468299	-10.5548	4.82467e-26	2.02647e-23	Clasp2	protein_coding
ENSMUSG00000036918	433.591	594.427	272.756	1.05452	0.0987483	10.4875	9.85717e-26	4.05023e-23	Ttc7	protein_coding
ENSMUSG00000023495	4727.51	3395.51	6059.52	-0.811998	0.0766965	-10.4636	1.2693e-25	5.10448e-23	Pcbp4	protein_coding
ENSMUSG00000073433	3496.13	2299.47	4692.79	-0.979722	0.0928251	-10.4295	1.81909e-25	7.16306e-23	Arhgdig	protein_coding
ENSMUSG00000022048	7357.64	5501.89	9213.38	-0.698406	0.0653851	-10.3825	2.97949e-25	1.14929e-22	Dpysl2	protein_coding
ENSMUSG00000041263	3390.01	2438.09	4341.93	-0.788716	0.0745814	-10.3046	6.71708e-25	2.53919e-22	Rusc1	protein_coding
ENSMUSG00000009075	821.742	1211.21	432.272	1.31623	0.127837	10.2965	7.30714e-25	2.70808e-22	Cabp7	protein_coding
ENSMUSG00000020689	410.65	269.188	552.111	-0.991345	0.0962318	-10.2754	9.0987e-25	3.3072e-22	Itgb3	protein_coding
ENSMUSG00000026489	714.882	932.956	496.809	0.862257	0.0820804	10.2533	1.14323e-24	4.07703e-22	Coq8a	protein_coding
ENSMUSG00000029223	15863.3	12025.2	19701.4	-0.696234	0.0673216	-10.2114	1.76276e-24	6.17e-22	Uchl1	protein_coding
ENSMUSG00000018507	814.091	541.001	1087.18	-0.947301	0.0908603	-10.1951	2.08599e-24	6.93044e-22	Trpv2	protein_coding
ENSMUSG00000027581	18830.4	14176.1	23484.7	-0.710738	0.0687853	-10.1977	2.02965e-24	6.93044e-22	Stmn3	protein_coding
ENSMUSG00000041959	892.127	540.849	1243.4	-1.10682	0.106062	-10.1949	2.09002e-24	6.93044e-22	S100a10	protein_coding
ENSMUSG00000055407	7547.93	5802.77	9293.1	-0.661209	0.0639187	-10.1919	2.15587e-24	7.02552e-22	Map6	protein_coding
ENSMUSG00000032946	2647.89	1766.49	3529.3	-0.934556	0.0894812	-10.1555	3.13055e-24	1.00289e-21	Rasgrp2	protein_coding
ENSMUSG00000110618	202.622	326.442	78.8011	1.63348	0.152439	10.1523	3.23583e-24	1.01934e-21	Gm39822
ENSMUSG00000024256	944.306	694.769	1193.84	-0.752968	0.0728001	-10.1397	3.68167e-24	1.14077e-21	Adcyap1	protein_coding
ENSMUSG00000042105	12967.8	10386.7	15549	-0.571278	0.0557061	-10.1315	4.00403e-24	1.22065e-21	Inpp5f	protein_coding
ENSMUSG00000087141	10011.5	7766.22	12256.7	-0.658593	0.0653122	-10.0323	1.09948e-23	3.29863e-21	Plcxd2	protein_coding
ENSMUSG00000027394	6026.22	4703.59	7348.86	-0.63743	0.063271	-9.9831	1.80734e-23	5.33758e-21	Ttl	protein_coding
ENSMUSG00000097391	1161.77	829.822	1493.72	-0.789346	0.0762335	-9.98137	1.83907e-23	5.34774e-21	Mirg	lincRNA
ENSMUSG00000025950	3933.76	2886.06	4981.45	-0.770739	0.0766223	-9.97067	2.04839e-23	5.86616e-21	Idh1	protein_coding
ENSMUSG00000021670	9959.08	8260.21	11657.9	-0.490846	0.0488895	-9.94206	2.73109e-23	7.70452e-21	Hmgcr	protein_coding
ENSMUSG00000012126	532.754	696.306	369.203	0.870774	0.0856544	9.93485	2.93609e-23	8.16103e-21	Ubxn11	protein_coding
ENSMUSG00000038587	1547.71	1009.49	2085.92	-0.974415	0.0959754	-9.87564	5.30913e-23	1.45432e-20	Akap12	protein_coding
ENSMUSG00000001467	5073.2	4068.19	6078.21	-0.5653	0.0567403	-9.82329	8.93741e-23	2.31405e-20	Cyp51	protein_coding
ENSMUSG00000020173	1947.47	1463.47	2431.47	-0.708232	0.0707823	-9.82451	8.83055e-23	2.31405e-20	Cobl	protein_coding
ENSMUSG00000072235	15331.9	10469.2	20194.7	-0.889742	0.0881269	-9.82663	8.64633e-23	2.31405e-20	Tuba1a	protein_coding
ENSMUSG00000078185	1454.28	1068.63	1839.93	-0.761146	0.0763702	-9.82394	8.88065e-23	2.31405e-20	Chml	protein_coding
ENSMUSG00000020914	670.172	467.071	873.273	-0.85522	0.0855847	-9.77001	1.51443e-22	3.86815e-20	Top2a	protein_coding
ENSMUSG00000029055	3117.1	3835.78	2398.42	0.68377	0.070489	9.7148	2.60767e-22	6.57167e-20	Plch2	protein_coding
ENSMUSG00000044847	10792.9	8233.15	13352.7	-0.691553	0.0710403	-9.67617	3.80699e-22	9.46787e-20	Lsm11	protein_coding
ENSMUSG00000036246	881.949	612.131	1151.77	-0.861664	0.0872498	-9.66228	4.36035e-22	1.07032e-19	Gmip	protein_coding
ENSMUSG00000113216	531.167	373.134	689.199	-0.846526	0.0862968	-9.65405	4.72539e-22	1.14506e-19
ENSMUSG00000051617	261.334	396.487	126.181	1.38629	0.143318	9.62435	6.31029e-22	1.50976e-19	Krt9	protein_coding
ENSMUSG00000034616	1433.85	1086.28	1781.43	-0.682017	0.0693241	-9.61716	6.76723e-22	1.59884e-19	Ssh3	protein_coding
ENSMUSG00000048385	3120.44	2354.38	3886.51	-0.704807	0.0727229	-9.57159	1.05279e-21	2.45664e-19	Scrt1	protein_coding
ENSMUSG00000028089	685.624	882.18	489.067	0.807927	0.0821934	9.56416	1.1312e-21	2.60741e-19	Chd1l	protein_coding
ENSMUSG00000045664	379.451	251.748	507.154	-0.946629	0.0972571	-9.55011	1.29558e-21	2.95034e-19	Cdc42ep2	protein_coding
ENSMUSG00000022044	11129.4	7855.95	14402.9	-0.839105	0.087124	-9.50524	1.99597e-21	4.49116e-19	Stmn4	protein_coding
ENSMUSG00000003348	581.753	397.234	766.272	-0.89011	0.091585	-9.49595	2.18207e-21	4.85216e-19	Mob3a	protein_coding
ENSMUSG00000018012	2433.95	1646.63	3221.28	-0.926473	0.0980916	-9.47226	2.73852e-21	6.0187e-19	Rac3	protein_coding
ENSMUSG00000038766	1328.99	1607.06	1050.92	0.610166	0.0639031	9.46883	2.82983e-21	6.14789e-19	Gabpb2	protein_coding
ENSMUSG00000031004	804.225	557.086	1051.36	-0.856714	0.0878733	-9.44082	3.69864e-21	7.94409e-19	Mki67	protein_coding
ENSMUSG00000035246	3824.74	2973.66	4675.82	-0.63261	0.0659741	-9.42812	4.17512e-21	8.86673e-19	Pcyt1b	protein_coding
ENSMUSG00000017144	1498.79	1178.34	1819.24	-0.625385	0.066006	-9.4202	4.50225e-21	9.45522e-19	Rnd3	protein_coding
ENSMUSG00000022594	8829.87	5693.76	11966	-0.982325	0.10081	-9.41276	4.83285e-21	1.0038e-18	Lynx1	protein_coding
ENSMUSG00000085586	199.386	283.586	115.186	1.16188	0.119948	9.37567	6.87397e-21	1.41223e-18		processed_transcript
ENSMUSG00000025607	2531.97	3017.52	2046.43	0.543715	0.057138	9.36545	7.57272e-21	1.53905e-18	Copg2	protein_coding
ENSMUSG00000028927	642.07	856.348	427.793	0.923367	0.0953145	9.34921	8.83053e-21	1.77559e-18	Padi2	protein_coding
ENSMUSG00000022847	268.895	368.469	169.321	1.02773	0.107235	9.33057	1.05298e-20	2.095e-18	Thpo	protein_coding
ENSMUSG00000021066	4474.46	3709.17	5239.75	-0.493681	0.0529327	-9.23349	2.61966e-20	5.15772e-18	Atl1	protein_coding
ENSMUSG00000027533	3691.71	3039.63	4343.8	-0.518822	0.0559276	-9.22676	2.78931e-20	5.43512e-18	Fabp5	protein_coding
ENSMUSG00000021223	519.587	342.404	696.77	-0.9532	0.102025	-9.19901	3.61265e-20	6.96763e-18	Papln	protein_coding
ENSMUSG00000058672	19998.5	15322.8	24674.3	-0.660021	0.0705458	-9.1746	4.53272e-20	8.65383e-18	Tubb2a	protein_coding
ENSMUSG00000028347	5668.41	4654.03	6682.78	-0.525256	0.0569761	-9.16872	4.78666e-20	9.04727e-18	Tmeff1	protein_coding
ENSMUSG00000006711	1642.48	1269.15	2015.81	-0.641479	0.0688748	-9.12084	7.4545e-20	1.39502e-17	D130043K22Rik	protein_coding
ENSMUSG00000014837	2494.76	1816.34	3173.17	-0.775746	0.0841555	-9.11593	7.80022e-20	1.44541e-17	4931428F04Rik	protein_coding
ENSMUSG00000021203	1680.36	2127.29	1233.44	0.748499	0.0809204	9.0533	1.38718e-19	2.54554e-17	Otub2	protein_coding
ENSMUSG00000039824	413.322	268.236	558.407	-0.978165	0.107151	-9.0282	1.74522e-19	3.17176e-17	Myl6b	protein_coding
ENSMUSG00000023484	190.149	88.4645	291.834	-1.37542	0.154869	-8.98604	2.56288e-19	4.56991e-17	Prph	protein_coding
ENSMUSG00000068876	332.657	194.918	470.396	-1.11984	0.119826	-8.98677	2.54601e-19	4.56991e-17	Cgn	protein_coding
ENSMUSG00000051652	1165.08	839.771	1490.38	-0.790467	0.086793	-8.97306	2.88397e-19	5.09439e-17	Lrrc3	protein_coding
ENSMUSG00000020142	3770.57	2965.77	4575.37	-0.597379	0.0651831	-8.96646	3.0619e-19	5.35861e-17	Slc1a4	protein_coding
ENSMUSG00000002012	5009.29	5978.03	4040.55	0.544579	0.0599821	8.90855	5.17047e-19	8.96578e-17	Pnck	protein_coding
ENSMUSG00000042115	879.554	638.727	1120.38	-0.777387	0.086419	-8.89452	5.86733e-19	1.00817e-16	Klhdc8a	protein_coding
ENSMUSG00000102252	16872.4	13903.1	19841.7	-0.498088	0.0553672	-8.86287	7.79792e-19	1.32782e-16	Snrpn	protein_coding
ENSMUSG00000044349	95506.3	80108.1	110904	-0.454044	0.0506235	-8.84182	9.41738e-19	1.58927e-16	Snhg11	protein_coding
ENSMUSG00000042208	3670.37	2899.95	4440.79	-0.602485	0.0673093	-8.83999	9.57311e-19	1.60125e-16	0610010F05Rik	protein_coding
ENSMUSG00000046598	6877.04	5572.73	8181.34	-0.546783	0.0613876	-8.81739	1.17156e-18	1.94242e-16	Bdh1	protein_coding
ENSMUSG00000030380	1062.01	1295.97	828.056	0.625867	0.0697636	8.81286	1.2199e-18	2.00499e-16	Mzf1	protein_coding
ENSMUSG00000032735	2228.95	1640.27	2817.63	-0.737191	0.081534	-8.80933	1.25893e-18	2.05129e-16	Ablim3	protein_coding
ENSMUSG00000036882	10746.7	8640.52	12852.8	-0.563053	0.0632209	-8.80471	1.31191e-18	2.11934e-16	Arhgap33	protein_coding
ENSMUSG00000098912	1594.38	1263.06	1925.7	-0.59574	0.0670153	-8.77196	1.75586e-18	2.8125e-16		processed_transcript
ENSMUSG00000021143	6676.18	5442.06	7910.3	-0.538993	0.0611008	-8.76338	1.89476e-18	3.00948e-16	Pacs2	protein_coding
ENSMUSG00000022351	5714.08	4662.81	6765.34	-0.535134	0.0606699	-8.75444	2.05122e-18	3.23084e-16	Sqle	protein_coding
ENSMUSG00000021534	586.73	392.859	780.601	-0.917396	0.102246	-8.75194	2.09709e-18	3.2758e-16	1700001L19Rik	protein_coding
ENSMUSG00000039936	1244.41	904.598	1584.23	-0.766636	0.0859541	-8.74076	2.31546e-18	3.58726e-16	Pik3cd	protein_coding
ENSMUSG00000020003	1674.69	2019.17	1330.21	0.57862	0.0649788	8.72111	2.75488e-18	4.23333e-16	Pex7	protein_coding
ENSMUSG00000046699	1778.02	1406.76	2149.29	-0.599307	0.0679755	-8.70023	3.31204e-18	5.04845e-16	Slitrk4	protein_coding
ENSMUSG00000028937	8731.42	6970.13	10492.7	-0.572604	0.0648412	-8.69394	3.50068e-18	5.29331e-16	Acot7	protein_coding
ENSMUSG00000051391	51304	40961.1	61646.9	-0.572046	0.0648037	-8.6881	3.68548e-18	5.52852e-16	Ywhag	protein_coding
ENSMUSG00000074264	1280.21	1589.51	970.903	0.679917	0.0766182	8.65067	5.11992e-18	7.61982e-16	Amy1	protein_coding
ENSMUSG00000028339	411.279	274.441	548.117	-0.907297	0.100778	-8.62756	6.26754e-18	9.2549e-16	Col15a1	protein_coding
ENSMUSG00000025420	259.024	350.372	167.676	0.974511	0.110935	8.58717	8.91377e-18	1.30604e-15	Katnal2	protein_coding
ENSMUSG00000025485	2575	2067.32	3082.67	-0.561371	0.0645039	-8.57412	9.98462e-18	1.45169e-15	Ric8a	protein_coding
ENSMUSG00000029875	1262.14	906.848	1617.44	-0.787262	0.0899706	-8.56143	1.11476e-17	1.60841e-15	Ccdc184	protein_coding
ENSMUSG00000053192	22967.4	18789.4	27145.4	-0.53393	0.0621502	-8.55442	1.18463e-17	1.69627e-15	Mllt11	protein_coding
ENSMUSG00000026014	4190.21	3325.61	5054.81	-0.576114	0.0658449	-8.55146	1.2154e-17	1.72723e-15	Raph1	protein_coding
ENSMUSG00000076432	3199.41	2552.19	3846.63	-0.578193	0.0667866	-8.54152	1.32464e-17	1.86843e-15	Ywhaq	protein_coding
ENSMUSG00000048721	565.002	775.281	354.723	1.01318	0.11544	8.53488	1.40303e-17	1.96435e-15	Fndc9	protein_coding
ENSMUSG00000027378	934.753	1171	698.502	0.705072	0.080275	8.53181	1.4407e-17	2.00225e-15	Nphp1	protein_coding
ENSMUSG00000028333	1332.59	1043.71	1621.48	-0.623865	0.0726972	-8.50071	1.8843e-17	2.59087e-15	Anp32b	protein_coding
ENSMUSG00000066441	1686.57	1369.29	2003.84	-0.540924	0.0629167	-8.50026	1.89164e-17	2.59087e-15	Rdh11	protein_coding
ENSMUSG00000034220	3835.5	3004.36	4666.64	-0.615091	0.0713023	-8.49159	2.03827e-17	2.77161e-15	Gpc1	protein_coding
ENSMUSG00000041649	526.796	360.397	693.195	-0.873014	0.100396	-8.47921	2.26734e-17	3.03936e-15	Klf8	protein_coding
ENSMUSG00000079022	714.542	892.907	536.178	0.708804	0.0819418	8.47951	2.26143e-17	3.03936e-15	Col22a1	protein_coding
ENSMUSG00000019027	313.107	442.98	183.234	1.11481	0.127954	8.47348	2.38176e-17	3.17025e-15	Dnah1	protein_coding
ENSMUSG00000066406	2655.84	3090.99	2220.7	0.487336	0.0576172	8.44512	3.0373e-17	4.01454e-15	Akap13	protein_coding
ENSMUSG00000035835	3322.05	2205.88	4438.22	-0.92137	0.106042	-8.43589	3.28678e-17	4.31413e-15	Plppr3	protein_coding
ENSMUSG00000060240	8820.55	7099.3	10541.8	-0.556647	0.0651734	-8.42397	3.63935e-17	4.74395e-15	Cend1	protein_coding
ENSMUSG00000069662	14085.8	11252.2	16919.3	-0.561923	0.0653654	-8.40921	4.12798e-17	5.34403e-15	Marcks	protein_coding
ENSMUSG00000097636	293.276	438.155	148.396	1.28754	0.146946	8.38162	5.22031e-17	6.71219e-15	Mirt1	lincRNA
ENSMUSG00000033022	1754.7	1392.59	2116.8	-0.592687	0.0701134	-8.36282	6.12391e-17	7.82081e-15	Cdo1	protein_coding
ENSMUSG00000026516	4926.89	5631.51	4222.26	0.412254	0.049012	8.33372	7.83397e-17	9.93757e-15	Nvl	protein_coding
ENSMUSG00000030652	1013.35	1241.29	785.418	0.619416	0.0720605	8.31562	9.12731e-17	1.1501e-14	Coq7	protein_coding
ENSMUSG00000059796	2659.22	2146.19	3172.25	-0.553063	0.0657686	-8.30914	9.64e-17	1.20666e-14	Eif4a1	protein_coding
ENSMUSG00000020990	646.712	493.319	800.106	-0.675576	0.0804512	-8.27937	1.23825e-16	1.53974e-14	Cdkl1	protein_coding
ENSMUSG00000030711	179.084	252.943	105.225	1.10009	0.126075	8.26881	1.35303e-16	1.67148e-14	Sult1a1	protein_coding
ENSMUSG00000021614	3352.6	2696.93	4008.28	-0.563597	0.0675138	-8.26434	1.40465e-16	1.72399e-14	Vcan	protein_coding
ENSMUSG00000100826	4347.11	3377.61	5316.61	-0.620444	0.0731607	-8.25737	1.48922e-16	1.81599e-14	Ipw	processed_transcript
ENSMUSG00000029126	13163	10778.1	15547.9	-0.522151	0.0629352	-8.21608	2.10268e-16	2.54762e-14	Nsg1	protein_coding
ENSMUSG00000018405	506.116	361.166	651.066	-0.799915	0.0956859	-8.21265	2.16352e-16	2.60464e-14	Mrm1	protein_coding
ENSMUSG00000029168	13562.3	9353.19	17771.3	-0.857895	0.10241	-8.19601	2.48502e-16	2.97275e-14	Dpysl5	protein_coding
ENSMUSG00000029161	1493.18	1155.28	1831.08	-0.642165	0.0772225	-8.19286	2.55083e-16	3.03228e-14	Cgref1	protein_coding
ENSMUSG00000035184	3594.08	2870.66	4317.49	-0.58858	0.0717807	-8.18917	2.63036e-16	3.10727e-14	Fam124a	protein_coding
ENSMUSG00000032193	807.912	610.814	1005.01	-0.679872	0.0809724	-8.18392	2.74754e-16	3.22554e-14	Ldlr	protein_coding
ENSMUSG00000027952	1924.77	1581.33	2268.22	-0.524093	0.063922	-8.17658	2.92021e-16	3.40709e-14	Pmvk	protein_coding
ENSMUSG00000034595	635.571	477.326	793.816	-0.710486	0.08669	-8.1664	3.17726e-16	3.68426e-14	Ppp1r18	protein_coding
ENSMUSG00000050211	3159.17	2167.77	4150.57	-0.872392	0.107046	-8.11611	4.8135e-16	5.54756e-14	Pla2g4e	protein_coding
ENSMUSG00000006517	1154.51	855.856	1453.16	-0.725776	0.0881314	-8.10296	5.36364e-16	6.14413e-14	Mvd	protein_coding
ENSMUSG00000043439	890.352	1188.51	592.194	0.910135	0.108862	8.09231	5.85438e-16	6.66588e-14	Epop	protein_coding
ENSMUSG00000020836	944.033	684.548	1203.52	-0.756889	0.0904261	-8.08061	6.44431e-16	7.22423e-14	Coro6	protein_coding
ENSMUSG00000028832	1671.27	1184.82	2157.71	-0.815029	0.0997526	-8.08033	6.45942e-16	7.22423e-14	Stmn1	protein_coding
ENSMUSG00000059714	3903.51	3029.9	4777.12	-0.634773	0.0774097	-8.08174	6.38489e-16	7.22423e-14	Flot1	protein_coding
ENSMUSG00000052921	789.83	597.883	981.776	-0.683017	0.082863	-8.06302	7.44317e-16	8.27549e-14	Arhgef15	protein_coding
ENSMUSG00000030946	1222.23	1511.05	933.417	0.656254	0.0792251	8.05098	8.2133e-16	9.07834e-14	Lhpp	protein_coding
ENSMUSG00000025384	1465.23	1062.23	1868.23	-0.768982	0.094147	-8.04574	8.57267e-16	9.42047e-14	Faap100	protein_coding
ENSMUSG00000072812	165.36	92.7312	237.989	-1.14621	0.138099	-8.0378	9.14649e-16	9.99294e-14	Ahnak2	protein_coding
ENSMUSG00000036067	1297.95	1000.18	1595.71	-0.64392	0.07847	-8.03566	9.30736e-16	1.01103e-13	Slc2a6	protein_coding
ENSMUSG00000020803	1298.46	1014.74	1582.17	-0.628982	0.07784	-8.02978	9.76477e-16	1.05465e-13	Txndc17	protein_coding
ENSMUSG00000000489	1074.99	805.847	1344.13	-0.685523	0.0822703	-8.02154	1.04432e-15	1.12151e-13	Pdgfb	protein_coding
ENSMUSG00000046807	1010.72	766.408	1255.04	-0.69178	0.0863047	-7.99888	1.25561e-15	1.33327e-13	Lrrc75b	protein_coding
ENSMUSG00000100417	68.9644	114.878	23.0505	1.48947	0.182115	7.99928	1.25148e-15	1.33327e-13		lincRNA
ENSMUSG00000034997	1138.44	861.981	1414.89	-0.69539	0.0864689	-7.99174	1.33049e-15	1.40489e-13	Htr2a	protein_coding
ENSMUSG00000036644	9613.21	11730.4	7495.98	0.596422	0.0719126	7.97344	1.54315e-15	1.62039e-13	Tbc1d9b	protein_coding
ENSMUSG00000020287	788.437	965.813	611.061	0.6193	0.0752065	7.95325	1.81676e-15	1.89716e-13	Mpg	protein_coding
ENSMUSG00000025505	838.052	1013.68	662.428	0.593359	0.0734009	7.94481	1.94489e-15	2.0198e-13	Tmem80	protein_coding
ENSMUSG00000005087	424.235	271.338	577.132	-0.972899	0.119884	-7.93848	2.04669e-15	2.1139e-13	Cd44	protein_coding
ENSMUSG00000052387	2216.17	1663.32	2769.03	-0.714611	0.0902006	-7.9262	2.25952e-15	2.32104e-13	Trpm3	protein_coding
ENSMUSG00000002343	1311.87	1057.2	1566.55	-0.556674	0.0695885	-7.91545	2.46363e-15	2.51703e-13	Armc6	protein_coding
ENSMUSG00000023067	753.633	531.342	975.925	-0.802162	0.0977863	-7.87686	3.3571e-15	3.41143e-13	Cdkn1a	protein_coding
ENSMUSG00000068391	535.085	672.72	397.45	0.708235	0.0866047	7.87093	3.52021e-15	3.55805e-13	Chrac1	protein_coding
ENSMUSG00000033615	13671.2	11022.4	16320	-0.543576	0.0677953	-7.8601	3.83819e-15	3.85881e-13	Cplx1	protein_coding
ENSMUSG00000039470	4305.71	3458.58	5152.83	-0.569887	0.0722987	-7.83852	4.55895e-15	4.55919e-13	Zdhhc2	protein_coding
ENSMUSG00000002147	403.346	291.556	515.137	-0.761566	0.0937638	-7.8378	4.58505e-15	4.56116e-13	Stat6	protein_coding
ENSMUSG00000029231	5188.25	4419.01	5957.49	-0.43891	0.0558902	-7.8352	4.68112e-15	4.63235e-13	Pdgfra	protein_coding
ENSMUSG00000041037	6171.08	5129.94	7212.21	-0.469374	0.0587318	-7.82875	4.92747e-15	4.85073e-13	Irgq	protein_coding
ENSMUSG00000031283	1071.19	820.479	1321.9	-0.66579	0.0844598	-7.80631	5.88858e-15	5.76684e-13	Chrdl1	protein_coding
ENSMUSG00000074575	2156.43	1699.43	2613.43	-0.583572	0.0725841	-7.79999	6.19111e-15	6.03187e-13	Kcng1	protein_coding
ENSMUSG00000021256	1928.56	1553.3	2303.82	-0.558292	0.0710637	-7.78325	7.06844e-15	6.85131e-13	Vash1	protein_coding
ENSMUSG00000035545	18518.2	20762.8	16273.7	0.361863	0.0464477	7.777	7.42632e-15	7.16148e-13	Leng8	protein_coding
ENSMUSG00000044708	8773.13	6995.01	10551.2	-0.586438	0.075183	-7.7687	7.92986e-15	7.60824e-13	Kcnj10	protein_coding
ENSMUSG00000047496	1967.58	1517.22	2417.94	-0.665574	0.0863901	-7.76514	8.15523e-15	7.78495e-13	Rnf152	protein_coding
ENSMUSG00000009292	1527.56	1821.19	1233.93	0.554923	0.0710873	7.75353	8.93758e-15	8.4889e-13	Trpm2	protein_coding
ENSMUSG00000060600	344.139	445.766	242.513	0.807795	0.100249	7.73361	1.04542e-14	9.87976e-13	Eno3	protein_coding
ENSMUSG00000018589	1529.33	1216.2	1842.45	-0.589065	0.075624	-7.73059	1.0705e-14	1.00665e-12	Glra2	protein_coding
ENSMUSG00000020258	344.762	444.874	244.65	0.806224	0.101886	7.72721	1.09931e-14	1.02862e-12	Glyctk	protein_coding
ENSMUSG00000026224	201.236	283.485	118.987	1.07038	0.138436	7.7086	1.27209e-14	1.18442e-12	4933407L21Rik	protein_coding
ENSMUSG00000021219	3888.98	3339.35	4438.61	-0.414473	0.0535075	-7.70536	1.30474e-14	1.20887e-12	Rgs6	protein_coding
ENSMUSG00000072640	3081.95	3615.59	2548.32	0.483886	0.0616587	7.68554	1.52356e-14	1.40472e-12	Lyrm9	protein_coding
ENSMUSG00000031816	1646.71	1917.88	1375.55	0.47344	0.0612888	7.63871	2.19404e-14	2.01309e-12	Mthfsd	protein_coding
ENSMUSG00000020723	4173.82	3416.9	4930.73	-0.520953	0.0675865	-7.63038	2.34056e-14	2.13192e-12	Cacng4	protein_coding
ENSMUSG00000027981	2170.83	2551.34	1790.33	0.495643	0.0637707	7.63008	2.34612e-14	2.13192e-12	Rnpc3	protein_coding
ENSMUSG00000025132	11118.8	9369.37	12868.1	-0.44496	0.0574819	-7.62762	2.39124e-14	2.16253e-12	Arhgdia	protein_coding
ENSMUSG00000057147	1335.16	1618.89	1051.42	0.599576	0.0773137	7.62536	2.43362e-14	2.19037e-12	Dph6	protein_coding
ENSMUSG00000045648	751.313	530.385	972.241	-0.813346	0.105661	-7.61387	2.66003e-14	2.38281e-12	Vwc2l	protein_coding
ENSMUSG00000052301	1850.61	1438.06	2263.16	-0.62466	0.0805174	-7.60993	2.74236e-14	2.44497e-12	Doc2a	protein_coding
ENSMUSG00000015942	748.751	905.986	591.516	0.596397	0.0773035	7.60047	2.95049e-14	2.61818e-12	Gtf2ird2	protein_coding
ENSMUSG00000038065	9417.29	7070.53	11764.1	-0.704073	0.0918693	-7.59849	2.996e-14	2.64614e-12	Mturn	protein_coding
ENSMUSG00000031360	1515.07	1236.91	1793.24	-0.522344	0.0677924	-7.59579	3.05927e-14	2.68945e-12	Ctps2	protein_coding
ENSMUSG00000025728	5367.26	6214.69	4519.82	0.443935	0.0574827	7.59437	3.09292e-14	2.70645e-12	Pigq	protein_coding
ENSMUSG00000038366	6488.66	5505.49	7471.83	-0.431639	0.0561892	-7.58631	3.29138e-14	2.86684e-12	Lasp1	protein_coding
ENSMUSG00000068290	2073.5	2425.2	1721.79	0.483874	0.0629475	7.575	3.59138e-14	3.11379e-12	Ddrgk1	protein_coding
ENSMUSG00000115729	169.601	106.974	232.228	-0.982011	0.126369	-7.57433	3.6099e-14	3.11556e-12
ENSMUSG00000031428	9327.36	7721.78	10932.9	-0.485781	0.0631089	-7.57244	3.66292e-14	3.14695e-12	Zcchc18	protein_coding
ENSMUSG00000008859	6094.51	5064.17	7124.84	-0.494047	0.0650418	-7.56453	3.89256e-14	3.3291e-12	Rala	protein_coding
ENSMUSG00000025203	52873.9	46195.5	59552.4	-0.363091	0.047592	-7.56247	3.95487e-14	3.36716e-12	Scd2	protein_coding
ENSMUSG00000020374	639.005	469.885	808.125	-0.729469	0.0934917	-7.56102	3.99934e-14	3.38975e-12	Rasgef1c	protein_coding
ENSMUSG00000036086	698.926	863.463	534.39	0.650402	0.083227	7.55828	4.08428e-14	3.44629e-12	Zranb3	protein_coding
ENSMUSG00000075224	1606	1315.42	1896.57	-0.506206	0.0655511	-7.54962	4.36541e-14	3.66714e-12	Lrrc55	protein_coding
ENSMUSG00000025213	59.0712	95.3181	22.8243	1.43149	0.176115	7.54884	4.39154e-14	3.67277e-12	Kazald1	protein_coding
ENSMUSG00000024777	7063.14	5909.38	8216.9	-0.470444	0.0617612	-7.54505	4.52125e-14	3.76459e-12	Ppp2r5b	protein_coding
ENSMUSG00000025875	768.775	605.051	932.499	-0.608075	0.0800896	-7.54193	4.6307e-14	3.83881e-12	Tspan17	protein_coding
ENSMUSG00000055523	371.182	485.534	256.83	0.837946	0.107764	7.53846	4.75545e-14	3.92501e-12	Gucy2g	protein_coding
ENSMUSG00000026425	6620.47	5383.91	7857.03	-0.526792	0.0686739	-7.53743	4.79308e-14	3.93887e-12	Srgap2	protein_coding
ENSMUSG00000039850	1389.61	1636.17	1143.06	0.490807	0.0633756	7.53593	4.84851e-14	3.96717e-12	Endov	protein_coding
ENSMUSG00000040795	899.511	1098.37	700.651	0.611008	0.0785244	7.52767	5.16542e-14	4.20826e-12	Iqcc	protein_coding
ENSMUSG00000039114	3208.55	2455.7	3961.39	-0.6377	0.0813669	-7.52313	5.348e-14	4.33831e-12	Nrn1	protein_coding
ENSMUSG00000026223	12775.6	15549.8	10001.4	0.619699	0.0818825	7.52092	5.4393e-14	4.39351e-12	Itm2c	protein_coding
ENSMUSG00000020121	1771.63	1340.43	2202.83	-0.676605	0.0878631	-7.51727	5.59336e-14	4.49873e-12	Srgap1	protein_coding
ENSMUSG00000038205	3071.33	2597.55	3545.11	-0.436423	0.0571973	-7.5111	5.86341e-14	4.69594e-12	Prkab2	protein_coding
ENSMUSG00000037071	5937.14	4629.9	7244.38	-0.62259	0.0817438	-7.50569	6.11056e-14	4.87323e-12	Scd1	protein_coding
ENSMUSG00000034295	3512.13	2988.07	4036.19	-0.439311	0.0583664	-7.4988	6.44024e-14	5.11458e-12	Fhod3	protein_coding
ENSMUSG00000001763	845.811	1031.53	660.093	0.614972	0.0804226	7.49453	6.65371e-14	5.262e-12	Tspan33	protein_coding
ENSMUSG00000071644	1297.92	1063.76	1532.08	-0.531332	0.0711545	-7.49144	6.81225e-14	5.36493e-12	Eef1g	protein_coding
ENSMUSG00000044352	3423.19	3972.97	2873.42	0.468387	0.0622454	7.4868	7.05712e-14	5.53471e-12	Sowaha	protein_coding
ENSMUSG00000051736	696.06	865.732	526.388	0.683443	0.0903468	7.47655	7.6301e-14	5.95936e-12	Fam229b	protein_coding
ENSMUSG00000022658	6094.93	4912.88	7276.98	-0.554353	0.073409	-7.47446	7.75213e-14	6.02975e-12	Tagln3	protein_coding
ENSMUSG00000024937	1672.35	1254.94	2089.76	-0.696464	0.091695	-7.46941	8.05562e-14	6.24014e-12	Ehbp1l1	protein_coding
ENSMUSG00000034926	4833.46	4120.57	5546.34	-0.420352	0.0556089	-7.46533	8.30936e-14	6.41042e-12	Dhcr24	protein_coding
ENSMUSG00000007021	7193.9	6098.41	8289.38	-0.427007	0.056258	-7.46375	8.40914e-14	6.46102e-12	Syngr3	protein_coding
ENSMUSG00000067594	551.682	692.915	410.448	0.704469	0.0908228	7.46177	8.53652e-14	6.53234e-12	Krt77	protein_coding
ENSMUSG00000089706	396.062	505.607	286.517	0.772427	0.104502	7.4425	9.87986e-14	7.52981e-12	B230216N24Rik	processed_transcript
ENSMUSG00000021913	2684.71	3213.2	2156.22	0.557501	0.0739005	7.43798	1.02237e-13	7.76059e-12	Ogdhl	protein_coding
ENSMUSG00000015961	4296.76	3685.16	4908.36	-0.416999	0.0557795	-7.43676	1.03182e-13	7.80095e-12	Adss	protein_coding
ENSMUSG00000018659	1837.55	2177.17	1497.93	0.507495	0.0663586	7.42832	1.09982e-13	8.28195e-12	Pnpo	protein_coding
ENSMUSG00000021273	2709.89	2285.52	3134.27	-0.451151	0.060168	-7.42217	1.15217e-13	8.64176e-12	Fdft1	protein_coding
ENSMUSG00000022865	12949.4	10278.5	15620.3	-0.591256	0.0791095	-7.42007	1.17062e-13	8.74544e-12	Cxadr	protein_coding
ENSMUSG00000021710	1703.79	1295.67	2111.91	-0.656819	0.0856501	-7.41867	1.18301e-13	8.80317e-12	Nln	protein_coding
ENSMUSG00000073779	69.0497	118.274	19.8252	1.47313	0.189327	7.41075	1.2559e-13	9.30893e-12		antisense
ENSMUSG00000018554	260.913	350.161	171.664	0.920878	0.118981	7.39837	1.37864e-13	1.01788e-11	Ybx2	protein_coding
ENSMUSG00000031349	1687.08	1361.74	2012.41	-0.541928	0.0718942	-7.39778	1.38478e-13	1.01843e-11	Nsdhl	protein_coding
ENSMUSG00000097061	1302.49	1541.47	1063.5	0.526276	0.0703039	7.39482	1.41598e-13	1.03734e-11	9330151L19Rik	protein_coding
ENSMUSG00000033854	1161.74	909.478	1414.01	-0.614884	0.0822891	-7.38954	1.47341e-13	1.07525e-11	Kcnk10	protein_coding
ENSMUSG00000004933	7610.13	6055.46	9164.8	-0.576834	0.0769034	-7.38323	1.545e-13	1.12316e-11	Matk	protein_coding
ENSMUSG00000036036	2085.72	1485.74	2685.7	-0.789327	0.104727	-7.38164	1.56354e-13	1.13228e-11	Zfp57	protein_coding
ENSMUSG00000034744	1331.42	1096.55	1566.29	-0.507627	0.0683931	-7.35638	1.88967e-13	1.36323e-11	Nagk	protein_coding
ENSMUSG00000043061	2933.85	3398.15	2469.56	0.454053	0.0610235	7.35474	1.91298e-13	1.3748e-11	Tmem18	protein_coding
ENSMUSG00000025920	6150.83	5281.61	7020.05	-0.41309	0.0558957	-7.34888	1.99877e-13	1.43101e-11	Stau2	protein_coding
ENSMUSG00000026458	5044.81	4079.67	6009.94	-0.539552	0.0722642	-7.34287	2.09066e-13	1.49116e-11	Ppfia4	protein_coding
ENSMUSG00000053411	561.927	706.463	417.392	0.72593	0.10018	7.33311	2.24866e-13	1.59782e-11	Cbx7	protein_coding
ENSMUSG00000031391	12738.5	9153.67	16323.4	-0.766346	0.101409	-7.31726	2.53084e-13	1.79159e-11	L1cam	protein_coding
ENSMUSG00000037788	7040.35	6182.82	7897.88	-0.357187	0.0486704	-7.30258	2.82306e-13	1.99099e-11	Vopp1	protein_coding
ENSMUSG00000026837	2353.66	1878.44	2828.88	-0.564585	0.0757312	-7.29805	2.91963e-13	2.05145e-11	Col5a1	protein_coding
ENSMUSG00000031872	1182.58	919.679	1445.47	-0.627682	0.0851047	-7.29588	2.96709e-13	2.07708e-11	Bean1	protein_coding
ENSMUSG00000022076	360.134	266.276	453.992	-0.726071	0.0988471	-7.29255	3.0414e-13	2.12124e-11	Klhl1	protein_coding
ENSMUSG00000062376	1325.02	1565.44	1084.61	0.506383	0.0677366	7.28929	3.11586e-13	2.16518e-11	Borcs7	protein_coding
ENSMUSG00000038943	281.8	197.134	366.467	-0.813948	0.108911	-7.2836	3.25036e-13	2.25037e-11	Prc1	protein_coding
ENSMUSG00000053164	430.028	310.21	549.847	-0.772593	0.105795	-7.26623	3.69659e-13	2.54997e-11	Gpr21	protein_coding
ENSMUSG00000022661	6895.61	5629.2	8162.02	-0.530635	0.072781	-7.25186	4.11083e-13	2.82541e-11	Cd200	protein_coding
ENSMUSG00000057411	1199.53	1412.56	986.498	0.499912	0.0675852	7.2481	4.22647e-13	2.89437e-11	Fam173a	protein_coding
ENSMUSG00000038524	579.786	425.102	734.47	-0.738641	0.10117	-7.24063	4.4659e-13	3.04729e-11	Fchsd1	protein_coding
ENSMUSG00000024664	1632.33	1308.1	1956.56	-0.561295	0.0764662	-7.235	4.65518e-13	3.15368e-11	Fads3	protein_coding
ENSMUSG00000026688	3284.38	2719.5	3849.26	-0.500266	0.0688581	-7.23507	4.65278e-13	3.15368e-11	Mgst3	protein_coding
ENSMUSG00000038126	1899.09	2183.46	1614.72	0.428622	0.0586117	7.22493	5.01372e-13	3.38444e-11	Mphosph9	protein_coding
ENSMUSG00000052906	930.42	1124.55	736.285	0.579219	0.077916	7.22049	5.17993e-13	3.48419e-11	Ubxn8	protein_coding
ENSMUSG00000027306	192.696	128.214	257.178	-0.893969	0.122062	-7.20869	5.64947e-13	3.78654e-11	Nusap1	protein_coding
ENSMUSG00000018965	14338.1	11764.7	16911.5	-0.499702	0.0678434	-7.20286	5.89621e-13	3.93796e-11	Ywhah	protein_coding
ENSMUSG00000037419	2139.77	1835.62	2443.91	-0.405593	0.0556394	-7.19871	6.07868e-13	4.04553e-11	Endod1	protein_coding
ENSMUSG00000018567	4717.54	3956.95	5478.12	-0.460428	0.0632639	-7.18921	6.51683e-13	4.32191e-11	Gabarap	protein_coding
ENSMUSG00000036469	2648.97	2122.28	3175.66	-0.568635	0.0785755	-7.18175	6.88259e-13	4.54852e-11	March1	protein_coding
ENSMUSG00000031970	487.853	356.4	619.307	-0.741689	0.101815	-7.17962	6.99056e-13	4.60378e-11	Dbndd1	protein_coding
ENSMUSG00000033491	733.226	549.173	917.279	-0.698381	0.0957054	-7.17869	7.03847e-13	4.61924e-11	Prss35	protein_coding
ENSMUSG00000031993	3387.81	3977.32	2798.3	0.493433	0.0680331	7.14554	8.96414e-13	5.86267e-11	Snx19	protein_coding
ENSMUSG00000015377	2790.42	3234.32	2346.53	0.471802	0.0662714	7.13265	9.84526e-13	6.41673e-11	Dennd6b	protein_coding
ENSMUSG00000017774	1043.91	831.526	1256.29	-0.560087	0.0762855	-7.1279	1.01914e-12	6.61954e-11	Myo1c	protein_coding
ENSMUSG00000027318	133.267	190.874	75.6609	1.08849	0.15015	7.11221	1.142e-12	7.39211e-11	Adam33	protein_coding
ENSMUSG00000031398	2687.2	2068.9	3305.5	-0.640396	0.0884027	-7.11006	1.15989e-12	7.48231e-11	Plxna3	protein_coding
ENSMUSG00000049122	759.933	603.058	916.809	-0.58941	0.0825944	-7.10417	1.21046e-12	7.78195e-11	Frmd3	protein_coding
ENSMUSG00000108616	1523.52	1269.19	1777.86	-0.482966	0.067464	-7.09963	1.25096e-12	8.01502e-11
ENSMUSG00000054428	6747.11	5541.43	7952.8	-0.510725	0.0711643	-7.09644	1.28011e-12	8.17413e-11	Atpif1	protein_coding
ENSMUSG00000021301	5717.54	4873.46	6561.62	-0.425707	0.0594497	-7.09503	1.29327e-12	8.23035e-11	Hecw1	protein_coding
ENSMUSG00000025068	1533.82	1285.8	1781.85	-0.467019	0.0652966	-7.0927	1.31524e-12	8.34204e-11	Gsto1	protein_coding
ENSMUSG00000020657	5566	6328.25	4803.75	0.38461	0.0534042	7.0901	1.34018e-12	8.47183e-11	Dnajc27	protein_coding
ENSMUSG00000039735	16066.3	13795.4	18337.2	-0.412871	0.0579627	-7.08283	1.41241e-12	8.89868e-11	Fnbp1l	protein_coding
ENSMUSG00000067931	917.928	702.048	1133.81	-0.653614	0.0904994	-7.06931	1.55701e-12	9.7771e-11	Zfp948	protein_coding
ENSMUSG00000078815	116.921	165.441	68.4001	1.06107	0.143582	7.0616	1.64598e-12	1.03015e-10	Cacng6	protein_coding
ENSMUSG00000041625	447.143	559.975	334.311	0.69115	0.0949895	7.04966	1.79357e-12	1.11882e-10	Ggact	protein_coding
ENSMUSG00000021268	236754	202218	271291	-0.396914	0.0549641	-7.04907	1.80119e-12	1.11988e-10	Meg3	lincRNA
ENSMUSG00000059013	647.258	485.314	809.202	-0.694961	0.0973206	-7.04847	1.80896e-12	1.12102e-10	Sh2d3c	protein_coding
ENSMUSG00000031604	3964.51	3286.61	4642.41	-0.486283	0.0680684	-7.04477	1.85768e-12	1.14745e-10	Msmo1	protein_coding
ENSMUSG00000028680	663.223	534.848	791.598	-0.551576	0.0774156	-7.04417	1.8657e-12	1.14865e-10	Plk3	protein_coding
ENSMUSG00000027852	4076.43	3421.63	4731.23	-0.469298	0.0664519	-7.03982	1.92489e-12	1.18124e-10	Nras	protein_coding
ENSMUSG00000020905	679.24	484.913	873.566	-0.781006	0.10978	-7.0365	1.97131e-12	1.20582e-10	Usp43	protein_coding
ENSMUSG00000048483	1637.3	1385.78	1888.82	-0.436754	0.0612267	-7.03272	2.02544e-12	1.23493e-10	Zdhhc22	protein_coding
ENSMUSG00000063801	5081.47	5789	4373.93	0.385773	0.0538302	7.02459	2.14695e-12	1.30481e-10	Ap3s2	protein_coding
ENSMUSG00000017929	2431.82	2072.82	2790.82	-0.42622	0.0601978	-7.02106	2.20191e-12	1.33392e-10	B4galt5	protein_coding
ENSMUSG00000098128	371.856	484.985	258.728	0.812782	0.111094	7.02055	2.20997e-12	1.33452e-10		antisense
ENSMUSG00000005682	1627.22	1916.94	1337.49	0.518205	0.0738542	7.01402	2.31562e-12	1.39387e-10	Pan2	protein_coding
ENSMUSG00000044149	1430.93	1193.63	1668.23	-0.469248	0.0657546	-7.01156	2.35671e-12	1.4141e-10	Nkrf	protein_coding
ENSMUSG00000041313	3551.13	2901.73	4200.53	-0.507001	0.0706047	-7.00411	2.48565e-12	1.48675e-10	Slc7a1	protein_coding
ENSMUSG00000022797	6335.26	5260.77	7409.74	-0.486385	0.0687267	-7.00133	2.53536e-12	1.5117e-10	Tfrc	protein_coding
ENSMUSG00000032135	819.868	649.345	990.39	-0.578379	0.0805458	-6.99372	2.67684e-12	1.59104e-10	Mcam	protein_coding
ENSMUSG00000027401	334.243	424.136	244.351	0.732737	0.101601	6.98955	2.75772e-12	1.63397e-10	Tgm3	protein_coding
ENSMUSG00000042506	14097.1	11164.2	17029.9	-0.580939	0.0815067	-6.98674	2.81355e-12	1.66184e-10	Usp22	protein_coding
ENSMUSG00000021773	293.667	211.713	375.621	-0.762266	0.108023	-6.97918	2.96906e-12	1.74823e-10	Comtd1	protein_coding
ENSMUSG00000002804	237.272	309.673	164.872	0.816312	0.111623	6.96275	3.33694e-12	1.95874e-10	Nudt14	protein_coding
ENSMUSG00000045180	5926.57	5133.15	6719.99	-0.382688	0.0543949	-6.95704	3.47487e-12	2.03339e-10	Shroom2	protein_coding
ENSMUSG00000036104	3727.73	4301.04	3154.41	0.439925	0.0625586	6.95548	3.5136e-12	2.04971e-10	Rab3gap1	protein_coding
ENSMUSG00000109857	93.1544	47.6335	138.675	-1.18189	0.161514	-6.95227	3.59463e-12	2.09053e-10
ENSMUSG00000030554	2989.65	2420.38	3558.92	-0.533486	0.0753404	-6.94371	3.81922e-12	2.21433e-10	Synm	protein_coding
ENSMUSG00000004961	4743.02	3914.29	5571.75	-0.48655	0.0685721	-6.93822	3.97066e-12	2.29023e-10	Syt5	protein_coding
ENSMUSG00000053024	2811.8	2259.94	3363.67	-0.54113	0.0757843	-6.93809	3.97437e-12	2.29023e-10	Cntn2	protein_coding
ENSMUSG00000109122	573.67	409.121	738.219	-0.773281	0.107668	-6.93639	4.02253e-12	2.31094e-10
ENSMUSG00000022346	563.149	428.037	698.261	-0.668419	0.0955474	-6.93531	4.05318e-12	2.32149e-10	Myc	protein_coding
ENSMUSG00000013495	1583.37	1833.08	1333.67	0.454379	0.0649618	6.93376	4.098e-12	2.34007e-10	Tmem175	protein_coding
ENSMUSG00000003814	17184.8	15030.9	19338.8	-0.352891	0.0502249	-6.93125	4.17129e-12	2.36968e-10	Calr	protein_coding
ENSMUSG00000067274	3090.26	2424.14	3756.37	-0.619986	0.0901713	-6.93113	4.17493e-12	2.36968e-10	Rplp0	protein_coding
ENSMUSG00000032418	2175.16	1769.14	2581.19	-0.526558	0.0747962	-6.91938	4.53618e-12	2.56702e-10	Me1	protein_coding
ENSMUSG00000029103	5941.08	6749.63	5132.54	0.378537	0.0537693	6.91407	4.70948e-12	2.65713e-10	Lrpap1	protein_coding
ENSMUSG00000004473	201.82	267.684	135.955	0.8661	0.118534	6.90682	4.95651e-12	2.78819e-10	Clec11a	protein_coding
ENSMUSG00000075316	380.788	257.911	503.666	-0.858388	0.122168	-6.90441	5.04114e-12	2.82738e-10	Scn9a	protein_coding
ENSMUSG00000021087	43989.6	37217.2	50761.9	-0.428281	0.0607978	-6.90269	5.10277e-12	2.85348e-10	Rtn1	protein_coding
ENSMUSG00000000392	290.524	380.645	200.404	0.822863	0.113655	6.90009	5.197e-12	2.8976e-10	Fap	protein_coding
ENSMUSG00000027968	876.362	1033.38	719.342	0.505775	0.0719767	6.89453	5.40439e-12	3.00436e-10	Larp7	protein_coding
ENSMUSG00000070305	268.523	345.722	191.323	0.772295	0.108492	6.87928	6.01555e-12	3.33431e-10	Mpzl3	protein_coding
ENSMUSG00000097993	104.542	158.438	50.646	1.18929	0.170887	6.87724	6.10229e-12	3.3725e-10	Ptprv	processed_transcript
ENSMUSG00000027978	1041.13	823.133	1259.13	-0.579174	0.0819095	-6.87106	6.37278e-12	3.51172e-10	Prss12	protein_coding
ENSMUSG00000022639	282.31	201.286	363.334	-0.785877	0.113312	-6.86982	6.4284e-12	3.53207e-10		lincRNA
ENSMUSG00000007655	1075.26	856.347	1294.17	-0.557119	0.0783727	-6.8688	6.47449e-12	3.54708e-10	Cav1	protein_coding
ENSMUSG00000025246	3928.14	3387.7	4468.58	-0.382134	0.0546641	-6.85759	7.00318e-12	3.82564e-10	Tbl1x	protein_coding
ENSMUSG00000026278	628.017	434.224	821.81	-0.830676	0.121085	-6.85659	7.05234e-12	3.83035e-10	Bok	protein_coding
ENSMUSG00000039661	3038.61	2552.05	3525.17	-0.466598	0.0678566	-6.85673	7.04551e-12	3.83035e-10	Dusp26	protein_coding
ENSMUSG00000096929	1102.2	894.825	1309.58	-0.489702	0.0676195	-6.85444	7.15905e-12	3.87717e-10	A330023F24Rik	lincRNA
ENSMUSG00000009828	2003.8	1678.68	2328.93	-0.465201	0.0671466	-6.85098	7.33438e-12	3.96077e-10	Ick	protein_coding
ENSMUSG00000049047	606.001	476.319	735.683	-0.609574	0.0887056	-6.85017	7.37622e-12	3.97202e-10	Armcx3	protein_coding
ENSMUSG00000018909	13672.5	11908	15437	-0.368535	0.0533154	-6.83592	8.14779e-12	4.37504e-10	Arrb1	protein_coding
ENSMUSG00000026426	10359	8768.49	11949.5	-0.438053	0.063351	-6.83205	8.37103e-12	4.48218e-10	Arl8a	protein_coding
ENSMUSG00000033578	2864.37	2340.15	3388.58	-0.519898	0.0752496	-6.82733	8.65107e-12	4.61904e-10	Tmem35a	protein_coding
ENSMUSG00000029208	4777.3	5516.78	4037.82	0.444347	0.0643968	6.82663	8.69304e-12	4.62837e-10	Guf1	protein_coding
ENSMUSG00000033088	835.277	622.115	1048.44	-0.702224	0.101448	-6.82497	8.79441e-12	4.66919e-10	Triobp	protein_coding
ENSMUSG00000050195	36.8953	61.862	11.9286	1.35744	0.188892	6.81283	9.56965e-12	5.06656e-10	Scd4	protein_coding
ENSMUSG00000066952	86.6359	131.425	41.8462	1.22664	0.169232	6.80097	1.03916e-11	5.48638e-10	Myo1h	protein_coding
ENSMUSG00000024211	619.78	484.091	755.469	-0.606636	0.0869008	-6.77795	1.21895e-11	6.39982e-10	Grm8	protein_coding
ENSMUSG00000048215	75.729	120.907	30.5511	1.30209	0.182264	6.77809	1.21773e-11	6.39982e-10	A630023P12Rik	lincRNA
ENSMUSG00000067081	152.758	208.53	96.9867	0.94242	0.133449	6.77556	1.23927e-11	6.48847e-10	Asb18	protein_coding
ENSMUSG00000026697	285.938	397.415	174.461	0.983429	0.148292	6.7751	1.24321e-11	6.49112e-10	Myoc	protein_coding
ENSMUSG00000044499	436.939	336.829	537.05	-0.644345	0.0943225	-6.77352	1.25682e-11	6.54414e-10	Hs3st5	protein_coding
ENSMUSG00000023886	374.881	473.549	276.214	0.724216	0.106588	6.769	1.2968e-11	6.73374e-10	Smoc2	protein_coding
ENSMUSG00000050623	223.058	158.465	287.65	-0.78225	0.113187	-6.76844	1.30183e-11	6.74132e-10	Catsperz	protein_coding
ENSMUSG00000055945	520.522	405.44	635.603	-0.608085	0.0871307	-6.76306	1.35108e-11	6.97726e-10	Prr18	protein_coding
ENSMUSG00000037355	1300.08	1518.33	1081.84	0.476217	0.0693159	6.75784	1.4006e-11	7.21329e-10	Uvssa	protein_coding
ENSMUSG00000040044	1835.44	2126.17	1544.71	0.443963	0.0643881	6.75387	1.4395e-11	7.39348e-10	Orc3	protein_coding
ENSMUSG00000035228	1800.65	2090.7	1510.6	0.453605	0.0659701	6.75049	1.47348e-11	7.54752e-10	Ccdc106	protein_coding
ENSMUSG00000049281	8223.61	6910.5	9536.72	-0.443442	0.0642929	-6.74607	1.51907e-11	7.76e-10	Scn3b	protein_coding
ENSMUSG00000001445	1941.19	2239.81	1642.57	0.427823	0.0620127	6.7451	1.52926e-11	7.79096e-10	Mrpl10	protein_coding
ENSMUSG00000035653	3476.87	2988.02	3965.72	-0.409605	0.0604782	-6.73529	1.63602e-11	8.31094e-10	Lrfn5	protein_coding
ENSMUSG00000036099	4360.89	3792.18	4929.6	-0.370268	0.0542754	-6.73493	1.64011e-11	8.31094e-10	Vezt	protein_coding
ENSMUSG00000062151	2696.77	2056.07	3337.47	-0.667804	0.0992454	-6.7334	1.65744e-11	8.37629e-10	Unc13c	protein_coding
ENSMUSG00000030706	1139.44	1345.52	933.361	0.506301	0.0737727	6.71896	1.83023e-11	9.22484e-10	Mrpl48	protein_coding
ENSMUSG00000018411	29464	23107.5	35820.6	-0.599236	0.0873937	-6.71565	1.87234e-11	9.41199e-10	Mapt	protein_coding
ENSMUSG00000110080	1060.58	1271.38	849.774	0.555259	0.0809485	6.70373	2.03164e-11	1.01857e-09
ENSMUSG00000028789	919.715	1104.69	734.741	0.560035	0.0817496	6.69456	2.16324e-11	1.08167e-09	Azin2	protein_coding
ENSMUSG00000033952	196.965	136.836	257.094	-0.81655	0.120476	-6.69382	2.17426e-11	1.08432e-09	Aspm	protein_coding
ENSMUSG00000041220	3578.38	3056.73	4100.03	-0.411443	0.0605097	-6.68913	2.24494e-11	1.11662e-09	Elovl6	protein_coding
ENSMUSG00000103310	332.3	231.319	433.281	-0.810798	0.117946	-6.68655	2.28488e-11	1.13351e-09	Pcdha12	protein_coding
ENSMUSG00000097048	610.344	735.668	485.02	0.574073	0.0837266	6.68587	2.2956e-11	1.13584e-09	1600020E01Rik	lincRNA
ENSMUSG00000032402	1252.74	1495.47	1010.01	0.55351	0.0826357	6.68182	2.35986e-11	1.16459e-09	Smad3	protein_coding
ENSMUSG00000086596	504.117	389.722	618.512	-0.627515	0.0916705	-6.6802	2.38621e-11	1.17452e-09	Susd5	protein_coding
ENSMUSG00000037656	2169.56	2506.4	1832.71	0.43798	0.0644712	6.67889	2.40754e-11	1.18195e-09	Slc20a2	protein_coding
ENSMUSG00000036533	828.479	685.252	971.705	-0.493898	0.073269	-6.67083	2.54353e-11	1.24547e-09	Cdc42ep3	protein_coding
ENSMUSG00000070348	1890.62	1518.2	2263.03	-0.550189	0.0809024	-6.66956	2.56566e-11	1.25306e-09	Ccnd1	protein_coding
ENSMUSG00000071657	2365.85	2003.19	2728.51	-0.426184	0.0625294	-6.66694	2.61193e-11	1.27237e-09	Bscl2	protein_coding
ENSMUSG00000032648	668.727	833.761	503.693	0.666907	0.0966751	6.66141	2.7121e-11	1.31778e-09	Pygm	protein_coding
ENSMUSG00000021486	2234.28	1922.73	2545.83	-0.403732	0.0601998	-6.65358	2.86047e-11	1.3863e-09	Prelid1	protein_coding
ENSMUSG00000027884	1058.03	1243.57	872.488	0.493719	0.0729181	6.65165	2.89818e-11	1.39783e-09	Clcc1	protein_coding
ENSMUSG00000028693	3180.44	2639.2	3721.68	-0.485466	0.0722373	-6.65161	2.89904e-11	1.39783e-09	Nasp	protein_coding
ENSMUSG00000027199	3973.76	3415.96	4531.57	-0.412123	0.0618333	-6.64741	2.98288e-11	1.43459e-09	Gatm	protein_coding
ENSMUSG00000022672	1705.1	1948.49	1461.7	0.412267	0.0614993	6.64029	3.13059e-11	1.50181e-09	Prkdc	protein_coding
ENSMUSG00000109179	466.204	583.675	348.734	0.692129	0.103051	6.6376	3.18826e-11	1.5256e-09	Gm35339
ENSMUSG00000075511	399.203	491.038	307.368	0.640282	0.0946345	6.63387	3.27008e-11	1.5608e-09		lincRNA
ENSMUSG00000029291	9981.42	8791.15	11171.7	-0.344379	0.0515192	-6.62941	3.37022e-11	1.60455e-09	Rufy3	protein_coding
ENSMUSG00000073787	120.762	73.6438	167.881	-0.984403	0.142634	-6.61586	3.6941e-11	1.75433e-09	Gm10575	processed_transcript
ENSMUSG00000110020	188.782	126.389	251.175	-0.870499	0.126331	-6.61436	3.73174e-11	1.76776e-09
ENSMUSG00000023004	652.012	498.887	805.138	-0.641076	0.0940237	-6.61369	3.74868e-11	1.77135e-09	Tuba1b	protein_coding
ENSMUSG00000038301	5508.88	4683.32	6334.43	-0.427534	0.0638785	-6.60976	3.84939e-11	1.8144e-09	Snx10	protein_coding
ENSMUSG00000026042	983.016	775.456	1190.58	-0.557006	0.0795692	-6.60868	3.8776e-11	1.82315e-09	Col5a2	protein_coding
ENSMUSG00000036752	4699.4	3897.65	5501.15	-0.483153	0.0722526	-6.59365	4.29137e-11	2.01269e-09	Tubb4b	protein_coding
ENSMUSG00000022103	1071.87	887.718	1256.03	-0.479196	0.0710425	-6.58935	4.41767e-11	2.06679e-09	Gfra2	protein_coding
ENSMUSG00000023192	1611.04	1303.32	1918.76	-0.512226	0.0744693	-6.58493	4.55112e-11	2.12397e-09	Grm2	protein_coding
ENSMUSG00000037624	2301.67	1862.81	2740.53	-0.524461	0.0773736	-6.57898	4.73675e-11	2.20515e-09	Kcnk2	protein_coding
ENSMUSG00000009376	2640.31	2018.19	3262.43	-0.658721	0.100043	-6.57853	4.75117e-11	2.20643e-09	Met	protein_coding
ENSMUSG00000019370	68116.8	56560.8	79672.8	-0.478602	0.07166	-6.5739	4.90149e-11	2.27066e-09	Calm3	protein_coding
ENSMUSG00000030323	1839.68	2189.34	1490.01	0.534914	0.0803138	6.56868	5.07637e-11	2.34593e-09	Ift122	protein_coding
ENSMUSG00000020601	3858.51	3348.56	4368.45	-0.370534	0.0555651	-6.56057	5.36038e-11	2.47114e-09	Trib2	protein_coding
ENSMUSG00000027332	2094.03	2575.04	1613.01	0.636403	0.0954287	6.55963	5.39415e-11	2.47463e-09	Ivd	protein_coding
ENSMUSG00000067242	3377.17	2900.31	3854.03	-0.396413	0.0593734	-6.55995	5.38241e-11	2.47463e-09	Lgi1	protein_coding
ENSMUSG00000030401	3908.78	3290.42	4527.13	-0.456153	0.0690701	-6.55851	5.43487e-11	2.48727e-09	Rtn2	protein_coding
ENSMUSG00000028971	348.26	436.571	259.949	0.694993	0.104496	6.55805	5.45173e-11	2.48897e-09	Cort	protein_coding
ENSMUSG00000032026	2318.65	1950.6	2686.7	-0.448362	0.0673081	-6.55188	5.6817e-11	2.5877e-09	Rexo2	protein_coding
ENSMUSG00000022768	226.827	150.742	302.912	-0.871898	0.129466	-6.54665	5.88415e-11	2.67347e-09	Ccdc116	protein_coding
ENSMUSG00000030357	3968.06	3383.8	4552.32	-0.415889	0.0626203	-6.54013	6.14649e-11	2.7793e-09	Fkbp4	protein_coding
ENSMUSG00000032047	6483.6	5673.78	7293.42	-0.367466	0.0559865	-6.54041	6.13507e-11	2.7793e-09	Acat1	protein_coding
ENSMUSG00000023019	1401.4	1761.87	1040.94	0.694067	0.102763	6.5386	6.20965e-11	2.80116e-09	Gpd1	protein_coding
ENSMUSG00000029482	2933.86	2409.46	3458.26	-0.492544	0.0733455	-6.53658	6.29421e-11	2.83254e-09	Aacs	protein_coding
ENSMUSG00000026447	1501.3	1231.79	1770.81	-0.50991	0.0772233	-6.53014	6.57096e-11	2.95006e-09	Pik3c2b	protein_coding
ENSMUSG00000039577	698.889	837.868	559.91	0.567445	0.0871858	6.52322	6.88123e-11	3.08204e-09	Nphp4	protein_coding
ENSMUSG00000103009	291	216.67	365.33	-0.695755	0.104452	-6.52186	6.94423e-11	3.10291e-09		TEC
ENSMUSG00000032534	1290.97	1498.01	1083.94	0.450954	0.0678022	6.52122	6.97388e-11	3.10881e-09	Cep63	protein_coding
ENSMUSG00000020170	2596.7	3020.03	2173.37	0.458048	0.0690454	6.51499	7.26959e-11	3.233e-09	Frs2	protein_coding
ENSMUSG00000029449	1514.32	1261.78	1766.87	-0.471597	0.0713797	-6.51404	7.31569e-11	3.24587e-09	Rhof	protein_coding
ENSMUSG00000031910	315.735	236.542	394.928	-0.683312	0.101818	-6.508	7.61582e-11	3.37112e-09	Has3	protein_coding
ENSMUSG00000027864	2728.64	2324.16	3133.12	-0.423516	0.0643041	-6.50577	7.72953e-11	3.41346e-09	Ptgfrn	protein_coding
ENSMUSG00000047986	256.242	169.755	342.729	-0.872077	0.128094	-6.50352	7.84624e-11	3.45692e-09	Palm3	protein_coding
ENSMUSG00000020277	4510.87	5309.59	3712.15	0.514285	0.0795621	6.49822	8.12755e-11	3.57253e-09	Pfkl	protein_coding
ENSMUSG00000097164	970.354	1159.25	781.456	0.532474	0.0792362	6.49758	8.16243e-11	3.57954e-09		lincRNA
ENSMUSG00000074899	152.957	206.532	99.3823	0.907633	0.133913	6.49681	8.20419e-11	3.58952e-09	Sptbn5	protein_coding
ENSMUSG00000001552	1153.9	931.924	1375.87	-0.523607	0.0777315	-6.49485	8.31171e-11	3.62817e-09	Jup	protein_coding
ENSMUSG00000023951	3318.18	2809.84	3826.51	-0.437514	0.0666668	-6.48909	8.63563e-11	3.76088e-09	Vegfa	protein_coding
ENSMUSG00000033961	643.102	772.124	514.08	0.575395	0.0894151	6.48827	8.68265e-11	3.77266e-09	Zfp446	protein_coding
ENSMUSG00000020475	195.923	267.388	124.459	0.927259	0.139509	6.48774	8.7135e-11	3.77738e-09	Pgam2	protein_coding
ENSMUSG00000027577	1511.32	1258.43	1764.22	-0.478755	0.0731364	-6.48606	8.81074e-11	3.81079e-09	Chrna4	protein_coding
ENSMUSG00000019874	6765.17	5109.39	8420.96	-0.667894	0.100342	-6.48514	8.86467e-11	3.82537e-09	Fabp7	protein_coding
ENSMUSG00000040430	4864.34	4261.99	5466.7	-0.354238	0.0540295	-6.48454	8.90043e-11	3.83205e-09	Pitpnc1	protein_coding
ENSMUSG00000049511	552.082	412.515	691.648	-0.691372	0.104358	-6.48242	9.0261e-11	3.87732e-09	Htr1b	protein_coding
ENSMUSG00000032186	33553	29488.7	37617.3	-0.357497	0.0550073	-6.48003	9.17059e-11	3.93046e-09	Tmod2	protein_coding
ENSMUSG00000031374	192.931	125.686	260.175	-0.895361	0.132361	-6.47196	9.67375e-11	4.13673e-09	Zfp92	protein_coding
ENSMUSG00000097801	131.508	179.921	83.0949	0.939178	0.142046	6.47107	9.73086e-11	4.15176e-09		lincRNA
ENSMUSG00000061950	1799.65	1564.01	2035.29	-0.376718	0.0576411	-6.46984	9.81083e-11	4.17645e-09	Ppp4r1	protein_coding
ENSMUSG00000037278	281.106	212.996	349.215	-0.670704	0.10328	-6.4661	1.00566e-10	4.27145e-09	Tmem97	protein_coding
ENSMUSG00000025170	1166.35	1375.58	957.12	0.516314	0.0800053	6.46023	1.04542e-10	4.43039e-09	Rab40b	protein_coding
ENSMUSG00000096943	120.676	168.049	73.3031	0.9855	0.140007	6.45871	1.056e-10	4.46518e-09		lincRNA
ENSMUSG00000030889	468.383	579.001	357.764	0.64841	0.0975096	6.4549	1.08289e-10	4.56868e-09	Vwa3a	protein_coding
ENSMUSG00000093904	10793.5	12199.2	9387.8	0.36325	0.0553178	6.45017	1.11725e-10	4.70317e-09	Tomm20	protein_coding
ENSMUSG00000021957	5077.49	4349.4	5805.58	-0.408939	0.0626736	-6.44938	1.1231e-10	4.71727e-09	Tkt	protein_coding
ENSMUSG00000049807	4575.31	3898.71	5251.9	-0.425007	0.065346	-6.44713	1.1399e-10	4.7772e-09	Arhgap23	protein_coding
ENSMUSG00000029212	6772.26	5751.04	7793.48	-0.416679	0.0631272	-6.44624	1.1466e-10	4.79467e-09	Gabrb1	protein_coding
ENSMUSG00000044442	1565.28	1817	1313.56	0.435063	0.0651844	6.44414	1.16259e-10	4.85078e-09	N6amt1	protein_coding
ENSMUSG00000035189	1051.55	873.556	1229.54	-0.48786	0.0753487	-6.44267	1.17389e-10	4.88715e-09	Ano4	protein_coding
ENSMUSG00000082229	3275.74	2868.9	3682.58	-0.362129	0.0558973	-6.43857	1.20604e-10	5.00995e-09	Nap1l2	protein_coding
ENSMUSG00000022211	4111.59	3278.24	4944.94	-0.562661	0.0857544	-6.43239	1.25613e-10	5.20661e-09	Carmil3	protein_coding
ENSMUSG00000022389	10001.3	11180	8822.69	0.342061	0.0529391	6.41731	1.38699e-10	5.73644e-09	Tef	protein_coding
ENSMUSG00000090061	4239.67	3549.46	4929.88	-0.459604	0.0705347	-6.41607	1.39839e-10	5.77094e-09	Nwd2	protein_coding
ENSMUSG00000035781	11048.7	12474.1	9623.32	0.362836	0.0556921	6.41545	1.40408e-10	5.78181e-09	R3hdm4	protein_coding
ENSMUSG00000030753	4970.05	5747.01	4193.09	0.427266	0.0646963	6.41433	1.41441e-10	5.81168e-09	Thap12	protein_coding
ENSMUSG00000045284	1719.51	1973.7	1465.31	0.432396	0.0673725	6.41007	1.45455e-10	5.96367e-09	Dcaf12l1	protein_coding
ENSMUSG00000110710	1398.02	1156.06	1639.97	-0.470219	0.0707293	-6.40903	1.46449e-10	5.9914e-09
ENSMUSG00000021708	4671.91	3913.14	5430.67	-0.458618	0.0705707	-6.40121	1.54151e-10	6.2929e-09	Rasgrf2	protein_coding
ENSMUSG00000048216	3012.63	2602.36	3422.9	-0.397383	0.0618133	-6.40047	1.54901e-10	6.30989e-09	Gpr85	protein_coding
ENSMUSG00000051098	2229.48	1867.79	2591.18	-0.462272	0.0714516	-6.39792	1.57504e-10	6.40213e-09	Mblac2	protein_coding
ENSMUSG00000044338	602.657	461.928	743.386	-0.635547	0.0964887	-6.39443	1.61152e-10	6.53635e-09	Aplnr	protein_coding
ENSMUSG00000020431	60221.2	53436.6	67005.9	-0.346515	0.0545885	-6.39209	1.63633e-10	6.6086e-09	Adcy1	protein_coding
ENSMUSG00000063714	246.103	313.061	179.144	0.732215	0.113016	6.39226	1.63448e-10	6.6086e-09		antisense
ENSMUSG00000040339	4667.24	4110.17	5224.32	-0.352207	0.0549959	-6.38473	1.71704e-10	6.91979e-09	Fam102b	protein_coding
ENSMUSG00000002812	1775.29	1442.47	2108.1	-0.509759	0.0771335	-6.38062	1.76367e-10	7.09257e-09	Flii	protein_coding
ENSMUSG00000027522	3062.47	3457.69	2667.26	0.366562	0.0566993	6.38019	1.76866e-10	7.09755e-09	Stx16	protein_coding
ENSMUSG00000043857	3458.9	2842.29	4075.51	-0.500061	0.0771064	-6.37574	1.82086e-10	7.29154e-09	Mgat5b	protein_coding
ENSMUSG00000052560	1705.72	1403.42	2008.01	-0.493531	0.0758033	-6.37316	1.85168e-10	7.39927e-09	Cpne8	protein_coding
ENSMUSG00000001034	1561.79	1271.65	1851.93	-0.526292	0.0821262	-6.3617	1.9953e-10	7.95634e-09	Mapk7	protein_coding
ENSMUSG00000032035	1127.64	918.735	1336.55	-0.516924	0.0798715	-6.35009	2.15192e-10	8.55342e-09	Ets1	protein_coding
ENSMUSG00000032657	1637.76	1384.8	1890.73	-0.430679	0.06634	-6.34993	2.15408e-10	8.55342e-09	Fam189b	protein_coding
ENSMUSG00000025287	669.4	538.435	800.366	-0.551012	0.0856243	-6.34251	2.26053e-10	8.95728e-09	Acot9	protein_coding
ENSMUSG00000023904	2992.3	2582.35	3402.25	-0.398602	0.0625721	-6.33867	2.31754e-10	9.16397e-09	Hcfc1r1	protein_coding
ENSMUSG00000029625	2039	2349.56	1728.45	0.425901	0.0658085	6.33612	2.35616e-10	9.29724e-09	Cpsf4	protein_coding
ENSMUSG00000026017	1326.53	1549.08	1103.97	0.46306	0.0710026	6.33495	2.37423e-10	9.34904e-09	Carf	protein_coding
ENSMUSG00000044433	1745.8	1396.06	2095.54	-0.55344	0.085412	-6.33452	2.38079e-10	9.35536e-09	Camsap3	protein_coding
ENSMUSG00000035311	5769.18	5020.32	6518.04	-0.382306	0.0602472	-6.33336	2.39879e-10	9.40652e-09	Gnptab	protein_coding
ENSMUSG00000098061	158.306	104.152	212.46	-0.882656	0.133982	-6.33	2.45168e-10	9.59403e-09		lincRNA
ENSMUSG00000054459	16013.9	13748.9	18278.9	-0.405915	0.0635741	-6.32296	2.56592e-10	1.00203e-08	Vsnl1	protein_coding
ENSMUSG00000054752	2319.22	1954.92	2683.53	-0.448359	0.0702906	-6.31174	2.75908e-10	1.07524e-08	Fsd1l	protein_coding
ENSMUSG00000049225	2322.47	1996.07	2648.86	-0.393952	0.0612885	-6.3039	2.90257e-10	1.12884e-08	Pdp1	protein_coding
ENSMUSG00000029500	3088.71	3487.26	2690.16	0.365067	0.0571512	6.29558	3.06248e-10	1.18858e-08	Pgam5	protein_coding
ENSMUSG00000021998	448.636	347.301	549.972	-0.60768	0.0922789	-6.29276	3.11875e-10	1.20794e-08	Lcp1	protein_coding
ENSMUSG00000062929	4859.03	4177.63	5540.43	-0.406862	0.0643102	-6.2903	3.16844e-10	1.22468e-08	Cfl2	protein_coding
ENSMUSG00000014444	876.099	701.254	1050.94	-0.545628	0.083975	-6.28983	3.17805e-10	1.22589e-08	Piezo1	protein_coding
ENSMUSG00000034755	2732.56	2275.5	3189.62	-0.492428	0.079138	-6.28818	3.21218e-10	1.23653e-08	Pcdh11x	protein_coding
ENSMUSG00000027435	1250.42	980.916	1519.93	-0.575226	0.0870118	-6.28585	3.26069e-10	1.25265e-08	Cd93	protein_coding
ENSMUSG00000024590	845.546	676.383	1014.71	-0.544093	0.0836697	-6.27535	3.48839e-10	1.33741e-08	Lmnb1	protein_coding
ENSMUSG00000023456	9728.62	8416.61	11040.6	-0.385827	0.0608328	-6.27477	3.50151e-10	1.33972e-08	Tpi1	protein_coding
ENSMUSG00000059149	2337.03	2744.1	1929.97	0.485179	0.0758501	6.26535	3.71986e-10	1.42039e-08	Mfsd4a	protein_coding
ENSMUSG00000044365	2737.64	2353.5	3121.78	-0.408001	0.0648155	-6.26452	3.7398e-10	1.42512e-08	Cxxc4	protein_coding
ENSMUSG00000063018	159.173	208.589	109.758	0.811155	0.124947	6.26251	3.78838e-10	1.44073e-08		processed_transcript
ENSMUSG00000111837	365.642	271.007	460.278	-0.692524	0.105885	-6.26199	3.80085e-10	1.44257e-08
ENSMUSG00000022324	957.623	1121.83	793.418	0.484428	0.0763741	6.26144	3.81444e-10	1.44483e-08	Matn2	protein_coding
ENSMUSG00000042055	2589.12	2976.2	2202.04	0.426742	0.0673964	6.25874	3.88111e-10	1.46714e-08	Wdr11	protein_coding
ENSMUSG00000021732	318.186	221.452	414.92	-0.795893	0.123658	-6.24061	4.35881e-10	1.64443e-08	Fgf10	protein_coding
ENSMUSG00000029471	11908.6	10557.5	13259.6	-0.326201	0.0518271	-6.23662	4.47136e-10	1.68353e-08	Camkk2	protein_coding
ENSMUSG00000025892	4371.34	3833.96	4908.73	-0.347085	0.0548517	-6.23387	4.55062e-10	1.70997e-08	Gria4	protein_coding
ENSMUSG00000030235	4770.42	4037.5	5503.34	-0.432681	0.0682776	-6.23067	4.64439e-10	1.74174e-08	Slco1c1	protein_coding
ENSMUSG00000038208	434.274	524.22	344.328	0.583233	0.0933128	6.23024	4.65734e-10	1.74314e-08	Pgap3	protein_coding
ENSMUSG00000026074	9336.12	8217.88	10454.4	-0.338459	0.0536257	-6.22684	4.7594e-10	1.77781e-08	Map4k4	protein_coding
ENSMUSG00000015879	1050.87	828.887	1272.84	-0.573887	0.0890723	-6.22564	4.79597e-10	1.78794e-08	Fam184b	protein_coding
ENSMUSG00000039474	3630.16	4351	2909.32	0.562688	0.0904309	6.22145	4.92567e-10	1.83268e-08	Wfs1	protein_coding
ENSMUSG00000021179	672.08	787.206	556.955	0.48594	0.076959	6.21586	5.10448e-10	1.89548e-08	Nrde2	protein_coding
ENSMUSG00000028149	14674	12733.9	16614.1	-0.375134	0.05957	-6.21164	5.24349e-10	1.94328e-08	Rap1gds1	protein_coding
ENSMUSG00000033910	5324.31	4628.95	6019.66	-0.37462	0.0596956	-6.20823	5.35842e-10	1.98199e-08	Gucy1a1	protein_coding
ENSMUSG00000034226	425.089	327.973	522.205	-0.628016	0.0999112	-6.20738	5.38766e-10	1.98891e-08	Rhov	protein_coding
ENSMUSG00000041216	2362.75	2027.76	2697.75	-0.391029	0.0615799	-6.1939	5.86924e-10	2.16247e-08	Clvs1	protein_coding
ENSMUSG00000028546	4822.83	4121.44	5524.22	-0.41148	0.065458	-6.19303	5.90173e-10	2.17021e-08	Elavl4	protein_coding
ENSMUSG00000031641	838.07	996.205	679.934	0.5234	0.0825972	6.19002	6.01547e-10	2.20774e-08	Cbr4	protein_coding
ENSMUSG00000022946	3031.47	2543.17	3519.77	-0.445381	0.0701901	-6.18865	6.06817e-10	2.22276e-08	Dopey2	protein_coding
ENSMUSG00000048330	3737.32	4220.71	3253.93	0.362896	0.0576889	6.1848	6.21807e-10	2.27326e-08	Ric3	protein_coding
ENSMUSG00000003410	13505.2	11569.8	15440.6	-0.392792	0.0619922	-6.1776	6.50841e-10	2.37481e-08	Elavl3	protein_coding
ENSMUSG00000036256	947.818	784.372	1111.26	-0.481766	0.0762339	-6.17153	6.76312e-10	2.463e-08	Igfbp7	protein_coding
ENSMUSG00000022420	1113.64	1281.54	945.742	0.425729	0.0679264	6.16934	6.85768e-10	2.49263e-08	Dnal4	protein_coding
ENSMUSG00000039252	5243.51	4499.24	5987.78	-0.403194	0.0644651	-6.16783	6.92336e-10	2.51168e-08	Lgi2	protein_coding
ENSMUSG00000005674	1999.81	1661.72	2337.89	-0.48578	0.0785013	-6.16706	6.95697e-10	2.51903e-08	Tomm40l	protein_coding
ENSMUSG00000042406	4351.12	3784.35	4917.89	-0.371582	0.0595729	-6.16362	7.11008e-10	2.56955e-08	Atf4	protein_coding
ENSMUSG00000063439	653.37	779.426	527.315	0.525035	0.0819916	6.16175	7.19443e-10	2.59508e-08	B9d2	protein_coding
ENSMUSG00000031422	6000.99	5304.14	6697.84	-0.338	0.0545576	-6.15824	7.35569e-10	2.64819e-08	Morf4l2	protein_coding
ENSMUSG00000023150	9654.55	8386.91	10922.2	-0.380682	0.0613986	-6.15692	7.41732e-10	2.6653e-08	Ivns1abp	protein_coding
ENSMUSG00000047606	458.335	360.738	555.932	-0.594808	0.0959358	-6.155	7.50783e-10	2.6927e-08	Ankrd34c	protein_coding
ENSMUSG00000072653	604.451	713.295	495.606	0.49992	0.0788998	6.14981	7.75769e-10	2.77705e-08	Zfp783	transcribed_unprocessed_pseudogene
ENSMUSG00000065979	1816.04	2104.41	1527.67	0.440103	0.0699821	6.14646	7.92318e-10	2.83093e-08	Cpped1	protein_coding
ENSMUSG00000059278	1067.06	1305.27	828.849	0.596818	0.0925801	6.1325	8.65091e-10	3.08511e-08	Naa38	protein_coding
ENSMUSG00000061981	5856.16	5056.23	6656.09	-0.382792	0.0613424	-6.13025	8.77394e-10	3.12309e-08	Flot2	protein_coding
ENSMUSG00000026773	1213.59	1016.28	1410.9	-0.44725	0.071005	-6.12375	9.13994e-10	3.24726e-08	Pfkfb3	protein_coding
ENSMUSG00000021262	7015.98	6145.45	7886.51	-0.36705	0.0599772	-6.11929	9.39916e-10	3.33309e-08	Evl	protein_coding
ENSMUSG00000036578	3393.45	2802.19	3984.7	-0.483936	0.0773837	-6.1129	9.78342e-10	3.46286e-08	Fxyd7	protein_coding
ENSMUSG00000060224	396.68	503.258	290.102	0.72268	0.117727	6.11129	9.8827e-10	3.49146e-08	Pyroxd2	protein_coding
ENSMUSG00000059970	1331.3	1579.98	1082.63	0.54583	0.0918558	6.10816	1.00786e-09	3.55403e-08	Hspa2	protein_coding
ENSMUSG00000024414	880.298	1032.4	728.192	0.481059	0.076798	6.10605	1.02124e-09	3.5945e-08	Mrpl27	protein_coding
ENSMUSG00000047989	1358.05	1576.76	1139.34	0.444287	0.0706693	6.10494	1.02841e-09	3.61301e-08	Ino80c	protein_coding
ENSMUSG00000018572	1468.42	1218.84	1718	-0.465386	0.0739516	-6.1019	1.04817e-09	3.6756e-08	Phf23	protein_coding
ENSMUSG00000095123	1060.34	1224.2	896.468	0.444995	0.0726391	6.09143	1.11906e-09	3.91691e-08		lincRNA
ENSMUSG00000025241	3099.73	3508.28	2691.18	0.386246	0.063418	6.07672	1.22662e-09	4.28547e-08	Fyco1	protein_coding
ENSMUSG00000024378	2246.11	1915.1	2577.12	-0.424198	0.0692729	-6.07509	1.23919e-09	4.32139e-08	Stard4	protein_coding
ENSMUSG00000020828	1445.01	1226.54	1663.49	-0.427921	0.0694795	-6.06907	1.28654e-09	4.47824e-08	Pld2	protein_coding
ENSMUSG00000024440	194.073	139.31	248.836	-0.743462	0.118144	-6.05985	1.36248e-09	4.73388e-08	Pcdh12	protein_coding
ENSMUSG00000001248	5476.44	4667.78	6285.1	-0.412511	0.066805	-6.05819	1.37662e-09	4.76549e-08	Gramd1a	protein_coding
ENSMUSG00000059674	649.693	513.088	786.299	-0.577361	0.0933634	-6.05837	1.37505e-09	4.76549e-08	Cdh24	protein_coding
ENSMUSG00000040359	1764.81	2018.92	1510.7	0.394818	0.063442	6.05401	1.41286e-09	4.88199e-08	Ufl1	protein_coding
ENSMUSG00000055436	10884.3	12217.4	9551.13	0.355263	0.0583319	6.0465	1.48026e-09	5.10553e-08	Srsf11	protein_coding
ENSMUSG00000004451	1189.1	1019.82	1358.38	-0.398777	0.0647241	-6.04133	1.52844e-09	5.26214e-08	Ralb	protein_coding
ENSMUSG00000044835	2176.59	1874.31	2478.88	-0.397197	0.0650227	-6.03891	1.55157e-09	5.33205e-08	Ankrd45	protein_coding
ENSMUSG00000079110	292.836	362.545	223.127	0.641551	0.10294	6.03815	1.55894e-09	5.34763e-08	Capn3	protein_coding
ENSMUSG00000022099	11596.8	10007.7	13185.8	-0.384332	0.0625991	-6.03435	1.59606e-09	5.46506e-08	Dmtn	protein_coding
ENSMUSG00000067873	4472.59	4952.1	3993.08	0.313605	0.051679	6.03247	1.61468e-09	5.51882e-08	Htatsf1	protein_coding
ENSMUSG00000021903	83.6905	119.063	48.3178	0.993728	0.163347	6.03016	1.63796e-09	5.58829e-08	Galnt15	protein_coding
ENSMUSG00000052727	55336.6	43937.7	66735.5	-0.559504	0.0896558	-6.02875	1.6523e-09	5.61692e-08	Map1b	protein_coding
ENSMUSG00000054720	1145.45	946.217	1344.67	-0.479104	0.0771441	-6.02882	1.65164e-09	5.61692e-08	Lrrc8c	protein_coding
ENSMUSG00000019894	4253.41	3660.31	4846.51	-0.407067	0.0673938	-6.02705	1.66978e-09	5.66615e-08	Slc6a15	protein_coding
ENSMUSG00000059995	7822.57	6846.21	8798.92	-0.361645	0.0596042	-6.02662	1.67425e-09	5.67114e-08	Atxn7l3	protein_coding
ENSMUSG00000041439	3611.13	3059.91	4162.35	-0.433308	0.0710076	-6.02362	1.70559e-09	5.76697e-08	Mfsd6	protein_coding
ENSMUSG00000057182	3794.94	3238.92	4350.95	-0.418612	0.0687883	-6.02251	1.71732e-09	5.79626e-08	Scn3a	protein_coding
ENSMUSG00000052848	302.991	234.326	371.656	-0.62183	0.102179	-6.015	1.79891e-09	6.06081e-08	C130026L21Rik	protein_coding
ENSMUSG00000024501	24310.3	12405.1	36215.6	-1.08031	0.177087	-6.01334	1.81734e-09	6.11202e-08	Dpysl3	protein_coding
ENSMUSG00000028251	611.714	488.791	734.638	-0.553561	0.0897462	-6.01119	1.84171e-09	6.17201e-08	Tstd3	protein_coding
ENSMUSG00000042834	21002.5	16540.5	25464.5	-0.589922	0.0971712	-6.01135	1.83982e-09	6.17201e-08	Nrep	protein_coding
ENSMUSG00000074657	49130	43234.3	55025.6	-0.339173	0.0556862	-6.0085	1.87243e-09	6.26385e-08	Kif5a	protein_coding
ENSMUSG00000024539	1432.88	1656.94	1208.82	0.442079	0.0727434	5.99437	2.04273e-09	6.82149e-08	Ptpn2	protein_coding
ENSMUSG00000055026	2403.18	2007.47	2798.89	-0.463223	0.0759709	-5.992	2.07275e-09	6.90953e-08	Gabrg3	protein_coding
ENSMUSG00000005873	17914.9	15798.2	20031.6	-0.343401	0.0569503	-5.99121	2.08282e-09	6.93089e-08	Reep5	protein_coding
ENSMUSG00000109898	28.333	48.3475	8.31841	1.2575	0.192813	5.98817	2.12218e-09	7.04944e-08	6330420H09Rik
ENSMUSG00000022443	2585.11	2109.69	3060.53	-0.480822	0.0760049	-5.97198	2.34384e-09	7.7721e-08	Myh9	protein_coding
ENSMUSG00000008206	3186.44	2666.33	3706.55	-0.461735	0.0764452	-5.96791	2.40319e-09	7.95493e-08	Cers4	protein_coding
ENSMUSG00000047363	65.0864	94.4774	35.6953	1.0218	0.169247	5.96275	2.48034e-09	8.19596e-08	Cstad	protein_coding
ENSMUSG00000020241	873.125	693.89	1052.36	-0.552297	0.0888015	-5.95978	2.52583e-09	8.32878e-08	Col6a2	protein_coding
ENSMUSG00000035576	1005.84	826.648	1185.03	-0.4931	0.0808024	-5.95926	2.53375e-09	8.32878e-08	L3mbtl1	protein_coding
ENSMUSG00000050074	43.522	70.947	16.0969	1.15223	0.191708	5.95954	2.52952e-09	8.32878e-08	Spink8	protein_coding
ENSMUSG00000052395	606.043	722.984	489.102	0.523405	0.0844385	5.95691	2.57055e-09	8.43506e-08	Rft1	protein_coding
ENSMUSG00000019923	24565.2	21848.7	27281.6	-0.310487	0.0514072	-5.95461	2.60689e-09	8.5395e-08	Zwint	protein_coding
ENSMUSG00000009739	5510.65	6292.08	4729.22	0.413916	0.0694916	5.94581	2.75097e-09	8.99586e-08	Pou6f1	protein_coding
ENSMUSG00000020289	1347.91	1537.49	1158.33	0.401631	0.0667397	5.94429	2.77656e-09	9.06387e-08	Nprl3	protein_coding
ENSMUSG00000063506	264.922	192.471	337.372	-0.725682	0.12105	-5.94313	2.79626e-09	9.11242e-08	Arhgap22	protein_coding
ENSMUSG00000000378	1499.83	1259.66	1739.99	-0.454255	0.0755842	-5.93862	2.87428e-09	9.3493e-08	Ccm2	protein_coding
ENSMUSG00000031907	1098.05	941.546	1254.56	-0.417653	0.0705283	-5.93836	2.87884e-09	9.3493e-08	Zfp90	protein_coding
ENSMUSG00000041774	610.349	476.113	744.585	-0.604643	0.100861	-5.93773	2.88991e-09	9.36914e-08	Ydjc	protein_coding
ENSMUSG00000068923	24291.2	21542.4	27040	-0.317391	0.0526694	-5.93681	2.90626e-09	9.40604e-08	Syt11	protein_coding
ENSMUSG00000096199	662.313	789.387	535.238	0.520916	0.0847858	5.93191	2.99436e-09	9.6746e-08	Ptrhd1	protein_coding
ENSMUSG00000030584	2250.72	1916.17	2585.26	-0.40717	0.0667625	-5.93154	3.00109e-09	9.67981e-08	Dpf1	protein_coding
ENSMUSG00000078202	1480.5	1259.51	1701.48	-0.429207	0.0720506	-5.92434	3.13556e-09	1.00963e-07	Nrarp	protein_coding
ENSMUSG00000020451	6215.44	5498.29	6932.59	-0.338669	0.0570098	-5.92153	3.18958e-09	1.02528e-07	Limk2	protein_coding
ENSMUSG00000041710	734.089	566.718	901.461	-0.622426	0.103521	-5.92095	3.20083e-09	1.02715e-07	Trpc5	protein_coding
ENSMUSG00000108880	409.882	316.202	503.562	-0.61317	0.0984605	-5.9198	3.22338e-09	1.03263e-07
ENSMUSG00000014554	628.062	738.95	517.175	0.492244	0.0817051	5.91839	3.25116e-09	1.03977e-07	Dguok	protein_coding
ENSMUSG00000034009	2735.31	2202.68	3267.95	-0.539078	0.0893579	-5.91349	3.34941e-09	1.06938e-07	Rxfp1	protein_coding
ENSMUSG00000020604	302.542	377.625	227.459	0.659906	0.105581	5.913	3.35939e-09	1.07076e-07	Arsg	protein_coding
ENSMUSG00000001473	177.046	123.856	230.236	-0.777916	0.123774	-5.90945	3.43246e-09	1.09199e-07	Tubb6	protein_coding
ENSMUSG00000038569	350.046	424.301	275.791	0.584737	0.0969491	5.90921	3.43757e-09	1.09199e-07	Rad9b	protein_coding
ENSMUSG00000028048	1408.03	1215.36	1600.71	-0.393857	0.0661781	-5.90479	3.53094e-09	1.11977e-07	Gba	protein_coding
ENSMUSG00000019927	2884.95	2537.57	3232.33	-0.342302	0.057285	-5.90111	3.61062e-09	1.14312e-07	Ube2d1	protein_coding
ENSMUSG00000029119	801.579	959.376	643.782	0.542828	0.0900169	5.89968	3.64199e-09	1.15113e-07	Man2b2	protein_coding
ENSMUSG00000029674	2695.78	2362.76	3028.8	-0.355225	0.0596689	-5.89812	3.67673e-09	1.16016e-07	Limk1	protein_coding
ENSMUSG00000099760	215.69	311.665	119.714	1.04313	0.161681	5.8946	3.75586e-09	1.18316e-07		antisense
ENSMUSG00000026792	1150.04	980.314	1319.76	-0.415624	0.0693921	-5.89406	3.7682e-09	1.18507e-07	Lrsam1	protein_coding
ENSMUSG00000020908	295.863	372.578	219.149	0.690247	0.110131	5.89365	3.77761e-09	1.18606e-07	Myh3	protein_coding
ENSMUSG00000052751	953.926	1106.3	801.553	0.463464	0.0788241	5.8921	3.81323e-09	1.19526e-07	Repin1	protein_coding
ENSMUSG00000057455	1669.8	1414.18	1925.42	-0.427866	0.0712529	-5.88931	3.87805e-09	1.21356e-07	Rit2	protein_coding
ENSMUSG00000005442	8943.43	7864.82	10022	-0.347948	0.0586324	-5.88765	3.91734e-09	1.22383e-07	Cic	protein_coding
ENSMUSG00000000056	2967.35	2579.01	3355.69	-0.370465	0.0620363	-5.88475	3.98656e-09	1.2434e-07	Narf	protein_coding
ENSMUSG00000024558	1765.15	1524.5	2005.8	-0.38345	0.0640013	-5.88438	3.99543e-09	1.24411e-07	Mapk4	protein_coding
ENSMUSG00000087082	42.8276	66.6734	18.9817	1.1584	0.183802	5.88358	4.0149e-09	1.24812e-07		antisense
ENSMUSG00000055862	1111.98	882.658	1341.3	-0.56527	0.0940013	-5.88089	4.08059e-09	1.26646e-07	Izumo4	protein_coding
ENSMUSG00000031134	3467.99	3036.07	3899.91	-0.343386	0.0571374	-5.88006	4.10125e-09	1.27078e-07	Rbmx	protein_coding
ENSMUSG00000078786	695.29	811.636	578.943	0.473907	0.0800377	5.87808	4.15041e-09	1.28391e-07	BC024978	protein_coding
ENSMUSG00000029089	557.472	664.62	450.324	0.527752	0.0871381	5.87442	4.24335e-09	1.31052e-07	Pacrgl	protein_coding
ENSMUSG00000041141	6325.72	7311.3	5340.15	0.429435	0.0712002	5.87266	4.28848e-09	1.32014e-07	Pnmal1	protein_coding
ENSMUSG00000072893	1780.15	2115.35	1444.95	0.521394	0.0868088	5.87284	4.28392e-09	1.32014e-07	4933439C10Rik	processed_transcript
ENSMUSG00000029469	1710.6	1949.63	1471.58	0.395128	0.0662088	5.86943	4.37297e-09	1.34396e-07	Ift81	protein_coding
ENSMUSG00000027669	5912.72	5122.02	6703.42	-0.385474	0.065155	-5.86763	4.42064e-09	1.3564e-07	Gnb4	protein_coding
ENSMUSG00000035051	3494.08	3070.77	3917.38	-0.345029	0.0581395	-5.86399	4.51873e-09	1.38425e-07	Dhx57	protein_coding
ENSMUSG00000041921	1239.57	1421.37	1057.77	0.414201	0.0695653	5.86	4.62868e-09	1.41564e-07	Metap1d	protein_coding
ENSMUSG00000008226	1069.82	1260.52	879.127	0.489208	0.0811711	5.85922	4.65037e-09	1.41998e-07	Scrn3	protein_coding
ENSMUSG00000005986	2603.79	2224.35	2983.23	-0.407513	0.0682703	-5.85876	4.66337e-09	1.42165e-07	Ankrd13d	protein_coding
ENSMUSG00000029832	254.172	191.535	316.808	-0.661523	0.110001	-5.85794	4.68651e-09	1.4264e-07	Nfe2l3	protein_coding
ENSMUSG00000025085	7501.83	6591.53	8412.13	-0.344523	0.0580828	-5.85637	4.7308e-09	1.43757e-07	Ablim1	protein_coding
ENSMUSG00000016253	2112.71	2437.43	1787.99	0.437272	0.0738546	5.85323	4.82118e-09	1.46268e-07	Nelfcd	protein_coding
ENSMUSG00000074794	1432.09	1226.7	1637.48	-0.413549	0.0702922	-5.84805	4.97378e-09	1.50656e-07	Arrdc3	protein_coding
ENSMUSG00000033436	4477.32	3989.63	4965.02	-0.312681	0.0529699	-5.84721	4.999e-09	1.51178e-07	Armcx2	protein_coding
ENSMUSG00000070695	2459.6	2020.4	2898.81	-0.494769	0.082784	-5.8464	5.02311e-09	1.51664e-07	Cntnap5a	protein_coding
ENSMUSG00000028822	2641.12	2279.37	3002.88	-0.396444	0.0674595	-5.84517	5.0605e-09	1.52307e-07	Tmem50a	protein_coding
ENSMUSG00000109372	2372.47	2047.84	2697.1	-0.394082	0.0668335	-5.84534	5.05546e-09	1.52307e-07	Gm19410
ENSMUSG00000052852	9644.93	8625.87	10664	-0.310388	0.0528946	-5.84422	5.08954e-09	1.52937e-07	Reep1	protein_coding
ENSMUSG00000030533	1213.64	1043.52	1383.76	-0.40731	0.0696475	-5.83834	5.2722e-09	1.58172e-07	Unc45a	protein_coding
ENSMUSG00000037787	1123.75	1317.67	929.82	0.467932	0.0771072	5.83808	5.28049e-09	1.58172e-07	Apopt1	protein_coding
ENSMUSG00000069808	904.436	763.843	1045.03	-0.438292	0.0739117	-5.83027	5.53376e-09	1.65496e-07	Fam57a	protein_coding
ENSMUSG00000022996	52.4024	81.1714	23.6334	1.09983	0.185838	5.82668	5.65412e-09	1.68829e-07	Wnt10b	protein_coding
ENSMUSG00000015002	5009.59	5670.53	4348.65	0.373463	0.0631921	5.82591	5.68038e-09	1.69345e-07	Efr3a	protein_coding
ENSMUSG00000028944	3777.4	3346.55	4208.25	-0.325109	0.0551755	-5.82292	5.7828e-09	1.71856e-07	Prkag2	protein_coding
ENSMUSG00000109293	59.4106	86.7532	32.068	1.04341	0.170551	5.82311	5.77612e-09	1.71856e-07	Dcst2
ENSMUSG00000019467	3362.78	3855.72	2869.85	0.434703	0.0756003	5.81808	5.95272e-09	1.76628e-07	Arhgef25	protein_coding
ENSMUSG00000055567	8456.54	9470.25	7442.83	0.355337	0.0611466	5.81649	6.00944e-09	1.78032e-07	Unc80	protein_coding
ENSMUSG00000037973	164.971	218.7	111.241	0.82417	0.13082	5.81246	6.15604e-09	1.8209e-07	Ccdc129	protein_coding
ENSMUSG00000057335	7048.92	6008.03	8089.82	-0.416987	0.0706852	-5.8118	6.18045e-09	1.82526e-07	Cep170	protein_coding
ENSMUSG00000037995	576.886	453.651	700.122	-0.587935	0.100736	-5.81139	6.1957e-09	1.82691e-07	Igsf9	protein_coding
ENSMUSG00000029622	660.611	535.133	786.089	-0.538738	0.0930223	-5.80961	6.26175e-09	1.84351e-07	Arpc1b	protein_coding
ENSMUSG00000024426	3102.77	2674.54	3530.99	-0.383885	0.0647327	-5.80777	6.33106e-09	1.86102e-07	Atat1	protein_coding
ENSMUSG00000032269	159.415	218.627	100.203	0.884456	0.158393	5.80467	6.44944e-09	1.89287e-07	Htr3a	protein_coding
ENSMUSG00000027499	19227.2	16242.2	22212.1	-0.450482	0.0777322	-5.80177	6.56186e-09	1.92288e-07	Pkia	protein_coding
ENSMUSG00000021033	2390.95	2700.15	2081.75	0.37463	0.0641344	5.79875	6.68099e-09	1.95476e-07	Gstz1	protein_coding
ENSMUSG00000036941	1281.42	1466.19	1096.64	0.414199	0.0709521	5.79832	6.69818e-09	1.95676e-07	Elac1	protein_coding
ENSMUSG00000040365	2073.28	2343.06	1803.5	0.374943	0.0640824	5.79661	6.76695e-09	1.9738e-07	Trim41	protein_coding
ENSMUSG00000033307	878.468	736.818	1020.12	-0.45926	0.0788595	-5.78708	7.16225e-09	2.08588e-07	Mif	protein_coding
ENSMUSG00000047821	181.457	127.901	235.013	-0.76227	0.130099	-5.78255	7.35751e-09	2.13945e-07	Trim16	protein_coding
ENSMUSG00000020628	2202.1	2493.05	1911.15	0.374191	0.0638591	5.77761	7.57709e-09	2.19992e-07	Trappc12	protein_coding
ENSMUSG00000050373	1249.08	1069.86	1428.31	-0.405825	0.0693304	-5.77179	7.84336e-09	2.27373e-07	Snx21	protein_coding
ENSMUSG00000022580	398.501	478.308	318.695	0.557073	0.0954575	5.76838	8.00356e-09	2.31662e-07	Rhpn1	protein_coding
ENSMUSG00000040459	10920.3	12227.6	9613.09	0.345669	0.0594375	5.76812	8.01589e-09	2.31664e-07	Arglu1	protein_coding
ENSMUSG00000032271	110.395	70.4453	150.345	-0.881765	0.151041	-5.76722	8.05908e-09	2.32557e-07	Nnmt	protein_coding
ENSMUSG00000024261	9505.8	8180.02	10831.6	-0.403631	0.0696981	-5.76551	8.14104e-09	2.34564e-07	Syt4	protein_coding
ENSMUSG00000085133	2508.66	2180.94	2836.38	-0.371945	0.0637464	-5.76475	8.17805e-09	2.35272e-07		sense_intronic
ENSMUSG00000040125	10676.8	9139.09	12214.5	-0.393145	0.0662763	-5.76395	8.21683e-09	2.36028e-07	Gpr26	protein_coding
ENSMUSG00000029552	225.817	167.686	283.947	-0.685513	0.119693	-5.75707	8.55882e-09	2.45479e-07	Tes	protein_coding
ENSMUSG00000075590	9775.45	8193.11	11357.8	-0.453267	0.0774501	-5.7541	8.71023e-09	2.49443e-07	Nrbp2	protein_coding
ENSMUSG00000019998	6861.76	6136.07	7587.45	-0.313918	0.0545605	-5.74686	9.09154e-09	2.59969e-07	Stx7	protein_coding
ENSMUSG00000074227	532.539	656.306	408.772	0.628548	0.105907	5.74649	9.11171e-09	2.60152e-07	Spint2	protein_coding
ENSMUSG00000056656	76.8393	110.085	43.5934	1.01673	0.159953	5.74466	9.21072e-09	2.62582e-07	Apol8	protein_coding
ENSMUSG00000100213	169.368	220.977	117.758	0.782228	0.134381	5.73715	9.62823e-09	2.74071e-07		lincRNA
ENSMUSG00000074001	140.997	186.271	95.7222	0.811908	0.135962	5.73458	9.77539e-09	2.77842e-07	Klhl40	protein_coding
ENSMUSG00000002458	1026.39	850.356	1202.42	-0.480581	0.08268	-5.73363	9.83036e-09	2.78566e-07	Rgs19	protein_coding
ENSMUSG00000038605	868.567	694.148	1042.99	-0.5419	0.0910269	-5.73381	9.81974e-09	2.78566e-07	Samd10	protein_coding
ENSMUSG00000045613	650.377	506.239	794.516	-0.611979	0.106312	-5.73121	9.97148e-09	2.82142e-07	Chrm2	protein_coding
ENSMUSG00000036046	9730.1	8709.94	10750.3	-0.306344	0.0531979	-5.72958	1.00682e-08	2.84452e-07	5031439G07Rik	protein_coding
ENSMUSG00000031207	1384.18	1163.86	1604.5	-0.429145	0.0721094	-5.72867	1.01219e-08	2.85542e-07	Msn	protein_coding
ENSMUSG00000024924	6001.33	5328.41	6674.26	-0.31543	0.0542937	-5.72403	1.04024e-08	2.93019e-07	Vldlr	protein_coding
ENSMUSG00000045007	1548.66	1775.5	1321.82	0.410776	0.0704893	5.72125	1.05745e-08	2.97424e-07	Tubg2	protein_coding
ENSMUSG00000043384	20459.8	16630.1	24289.4	-0.509521	0.0862654	-5.71808	1.07732e-08	3.02563e-07	Gprasp1	protein_coding
ENSMUSG00000051278	492.21	625.623	358.797	0.709458	0.11916	5.71756	1.08064e-08	3.03044e-07	Zgrf1	protein_coding
ENSMUSG00000034349	832.263	682.903	981.624	-0.502802	0.087024	-5.71711	1.0835e-08	3.03397e-07	Smc4	protein_coding
ENSMUSG00000022257	1412.73	1629.01	1196.46	0.433094	0.0749907	5.71419	1.10225e-08	3.08191e-07	Laptm4b	protein_coding
ENSMUSG00000028773	1246.37	1061.14	1431.59	-0.429388	0.0749336	-5.71254	1.113e-08	3.10737e-07	Fabp3	protein_coding
ENSMUSG00000023828	435.615	320.751	550.479	-0.69902	0.121442	-5.71206	1.11619e-08	3.11166e-07	Slc22a3	protein_coding
ENSMUSG00000025037	2478.54	2155.17	2801.92	-0.380616	0.0665262	-5.70872	1.13832e-08	3.16402e-07	Maoa	protein_coding
ENSMUSG00000053368	177.819	131.493	224.145	-0.692284	0.12245	-5.70875	1.13807e-08	3.16402e-07	Rxfp2	protein_coding
ENSMUSG00000116294	46.2354	71.9774	20.4934	1.13079	0.185072	5.70609	1.15603e-08	3.20853e-07
ENSMUSG00000010554	1200.08	1026.24	1373.93	-0.408007	0.0702872	-5.70454	1.16657e-08	3.23305e-07	Mettl16	protein_coding
ENSMUSG00000005553	124.491	165.914	83.0679	0.831673	0.143529	5.69789	1.21301e-08	3.35191e-07	Atp4a	protein_coding
ENSMUSG00000022372	2724.43	2237.86	3211	-0.502883	0.0876421	-5.69808	1.21163e-08	3.35191e-07	Sla	protein_coding
ENSMUSG00000027381	464.356	553.307	375.406	0.525031	0.0895578	5.69618	1.2252e-08	3.38065e-07	Bcl2l11	protein_coding
ENSMUSG00000063146	5983.34	5188.42	6778.26	-0.369816	0.0636486	-5.69576	1.22825e-08	3.38413e-07	Clip2	protein_coding
ENSMUSG00000063297	6742.34	5587.94	7896.75	-0.481807	0.0836163	-5.69188	1.25646e-08	3.45681e-07	Luzp2	protein_coding
ENSMUSG00000116525	131.202	81.2698	181.135	-0.924484	0.152007	-5.69036	1.26774e-08	3.48279e-07
ENSMUSG00000026155	5744.39	5082.82	6405.96	-0.323071	0.0558805	-5.68783	1.28665e-08	3.52961e-07	Smap1	protein_coding
ENSMUSG00000044017	214.472	285.89	143.053	0.8287	0.138868	5.68753	1.28894e-08	3.53075e-07	Adgrd1	protein_coding
ENSMUSG00000051113	187.117	239.336	134.899	0.722465	0.117004	5.6864	1.29744e-08	3.5489e-07	Fam71e1	protein_coding
ENSMUSG00000085782	161.321	218.071	104.572	0.859714	0.148158	5.68567	1.30301e-08	3.55899e-07		antisense
ENSMUSG00000028631	543.989	445.708	642.27	-0.510773	0.0903411	-5.68271	1.32578e-08	3.61595e-07	Kcnq4	protein_coding
ENSMUSG00000024957	448.197	355.336	541.059	-0.561154	0.0948969	-5.68224	1.32946e-08	3.62076e-07	Kcnk4	protein_coding
ENSMUSG00000025555	3694.05	3129.26	4258.84	-0.429439	0.0744484	-5.67775	1.36476e-08	3.71157e-07	Farp1	protein_coding
ENSMUSG00000024976	2771.68	2449.89	3093.48	-0.343215	0.0604232	-5.67496	1.38723e-08	3.76391e-07	Shoc2	protein_coding
ENSMUSG00000055553	883.281	1017.65	748.913	0.423909	0.0731494	5.67486	1.38799e-08	3.76391e-07	Kxd1	protein_coding
ENSMUSG00000004798	7520.22	6723.94	8316.5	-0.314228	0.055324	-5.67424	1.39302e-08	3.77214e-07	Ulk2	protein_coding
ENSMUSG00000032333	2396.92	2107.24	2686.59	-0.357318	0.0631045	-5.67316	1.40188e-08	3.79068e-07	Stoml1	protein_coding
ENSMUSG00000037062	7789.24	6795.54	8782.94	-0.369321	0.0647888	-5.66432	1.47609e-08	3.98565e-07	Sh3glb1	protein_coding
ENSMUSG00000100599	50.2723	74.279	26.2656	1.03385	0.177664	5.66403	1.47855e-08	3.9866e-07	1700120C14Rik	processed_transcript
ENSMUSG00000018451	3895.68	4482.11	3309.26	0.407817	0.0695238	5.65994	1.51423e-08	4.07118e-07	6330403K07Rik	lincRNA
ENSMUSG00000040174	492.195	583.479	400.912	0.510845	0.0877149	5.66002	1.51356e-08	4.07118e-07	Alkbh3	protein_coding
ENSMUSG00000035131	1766.83	1519.95	2013.7	-0.404086	0.0711279	-5.65936	1.51937e-08	4.07921e-07	Brinp3	protein_coding
ENSMUSG00000085007	936.582	742.617	1130.55	-0.58275	0.105207	-5.65314	1.57538e-08	4.2236e-07	Gm11549	processed_transcript
ENSMUSG00000062960	1626.67	1309.37	1943.97	-0.520291	0.087638	-5.65252	1.58108e-08	4.23287e-07	Kdr	protein_coding
ENSMUSG00000022816	2744.35	2309.57	3179.13	-0.436753	0.0752619	-5.65068	1.59811e-08	4.27241e-07	Fstl1	protein_coding
ENSMUSG00000025544	4816.54	5372.82	4260.26	0.33307	0.0585075	5.64847	1.61882e-08	4.32166e-07	Tm9sf2	protein_coding
ENSMUSG00000032303	89.2821	51.7381	126.826	-0.987671	0.161315	-5.64725	1.63038e-08	4.34639e-07	Chrna3	protein_coding
ENSMUSG00000001942	1067.68	1224.85	910.513	0.412897	0.0719193	5.64186	1.68227e-08	4.47838e-07	Siae	protein_coding
ENSMUSG00000023909	1996.51	1700.61	2292.42	-0.415768	0.072371	-5.64148	1.68599e-08	4.48198e-07	Paqr4	protein_coding
ENSMUSG00000000223	4745.93	4242.68	5249.18	-0.299809	0.0524465	-5.63984	1.70209e-08	4.51842e-07	Drp2	protein_coding
ENSMUSG00000022159	1939.64	2180.33	1698.95	0.353	0.0617685	5.63523	1.74827e-08	4.63451e-07	Rab2b	protein_coding
ENSMUSG00000040396	3124.02	3478.92	2769.12	0.321088	0.0562508	5.62647	1.8394e-08	4.86925e-07	Abhd13	protein_coding
ENSMUSG00000000555	351.599	262.141	441.057	-0.671697	0.113782	-5.62376	1.86848e-08	4.93931e-07	Itga5	protein_coding
ENSMUSG00000036362	723.608	543.373	903.842	-0.660666	0.113787	-5.62346	1.87171e-08	4.94095e-07	P2ry13	protein_coding
ENSMUSG00000021311	1695.75	1923.21	1468.28	0.383954	0.0675991	5.61908	1.91981e-08	5.06085e-07	Mtr	protein_coding
ENSMUSG00000031906	6075.18	5134.97	7015.4	-0.432034	0.0754103	-5.61775	1.93458e-08	5.0927e-07	Smpd3	protein_coding
ENSMUSG00000026455	1942.75	2199.12	1686.38	0.376867	0.0664509	5.61391	1.9781e-08	5.2e-07	Klhl12	protein_coding
ENSMUSG00000031149	1187.7	1029.17	1346.22	-0.388116	0.0688443	-5.6129	1.9896e-08	5.22298e-07	Praf2	protein_coding
ENSMUSG00000071042	678.838	570.608	787.067	-0.446598	0.0783143	-5.61055	2.01686e-08	5.28718e-07	Rasgrp3	protein_coding
ENSMUSG00000022295	8926.61	10019.7	7833.54	0.353473	0.0625669	5.6101	2.02207e-08	5.2935e-07	Atp6v1c1	protein_coding
ENSMUSG00000026796	1026.36	851.379	1201.34	-0.468031	0.0812122	-5.60778	2.04934e-08	5.35748e-07	Fam129b	protein_coding
ENSMUSG00000027254	31195.1	26938.9	35451.4	-0.367507	0.0634762	-5.60698	2.0589e-08	5.37503e-07	Map1a	protein_coding
ENSMUSG00000001098	1699.57	1462.26	1936.87	-0.385391	0.0670129	-5.60458	2.08759e-08	5.44241e-07	Kctd10	protein_coding
ENSMUSG00000009555	2211.81	2550.06	1873.55	0.434255	0.0767984	5.60425	2.09163e-08	5.44544e-07	Cdk9	protein_coding
ENSMUSG00000015291	21285.2	18378.6	24191.7	-0.376366	0.0655862	-5.601	2.13113e-08	5.54063e-07	Gdi1	protein_coding
ENSMUSG00000013833	1868.83	2153.5	1584.16	0.422291	0.0736291	5.59929	2.15233e-08	5.58807e-07	Med16	protein_coding
ENSMUSG00000021432	857.962	986.727	729.197	0.424713	0.0750752	5.59053	2.26374e-08	5.86926e-07	Slc35b3	protein_coding
ENSMUSG00000028581	806.62	682.23	931.009	-0.433123	0.0760785	-5.58917	2.2816e-08	5.90748e-07	Laptm5	protein_coding
ENSMUSG00000037933	3897.58	3470.47	4324.68	-0.316918	0.0562899	-5.58885	2.28574e-08	5.91009e-07	Bicd2	protein_coding
ENSMUSG00000021360	704.456	581.024	827.887	-0.486612	0.0850937	-5.58833	2.29268e-08	5.91994e-07	Gcnt2	protein_coding
ENSMUSG00000011148	214.144	269.088	159.2	0.676356	0.1182	5.5871	2.30893e-08	5.95377e-07	Adssl1	protein_coding
ENSMUSG00000032565	678.559	792.614	564.505	0.470507	0.0827775	5.58524	2.33375e-08	6.00956e-07	Nudt16	protein_coding
ENSMUSG00000078307	8300.38	7333.12	9267.64	-0.334323	0.0592641	-5.58492	2.33806e-08	6.01248e-07	AI593442	protein_coding
ENSMUSG00000021476	8435.61	9681.88	7189.34	0.41377	0.0728288	5.58288	2.36562e-08	6.07186e-07	Habp4	protein_coding
ENSMUSG00000054383	182.989	133.109	232.869	-0.710569	0.122075	-5.58274	2.36758e-08	6.07186e-07	Pnma1	protein_coding
ENSMUSG00000031762	879.697	1035.69	723.709	0.474636	0.0812321	5.58057	2.39738e-08	6.13996e-07	Mt2	protein_coding
ENSMUSG00000070509	3570.21	3093.98	4046.44	-0.385507	0.0687604	-5.58023	2.40196e-08	6.14337e-07	Rgma	protein_coding
ENSMUSG00000024411	10111.4	8560.65	11662.2	-0.435915	0.0774138	-5.57865	2.42396e-08	6.19124e-07	Aqp4	protein_coding
ENSMUSG00000019188	3462.15	3016.38	3907.92	-0.363171	0.0641796	-5.57541	2.46954e-08	6.29067e-07	H13	protein_coding
ENSMUSG00000078161	779.818	921.874	637.761	0.52755	0.0989257	5.57548	2.4685e-08	6.29067e-07	Erich3	protein_coding
ENSMUSG00000020651	172.724	228.894	116.554	0.804851	0.148629	5.57506	2.47441e-08	6.29459e-07	Slc26a4	protein_coding
ENSMUSG00000032925	208.121	260.556	155.687	0.678241	0.131388	5.57448	2.48271e-08	6.30721e-07	Itgbl1	protein_coding
ENSMUSG00000033623	3857.38	3441.51	4273.25	-0.310985	0.0553136	-5.57398	2.48977e-08	6.31667e-07	Pcgf3	protein_coding
ENSMUSG00000042015	1926.86	2166.04	1687.69	0.349392	0.0617146	5.57251	2.51098e-08	6.36194e-07	Wdr41	protein_coding
ENSMUSG00000027309	5871.25	5207.72	6534.79	-0.314087	0.0553876	-5.56758	2.58299e-08	6.53561e-07	4930402H24Rik	protein_coding
ENSMUSG00000004018	487.042	571.705	402.379	0.491932	0.0874449	5.56622	2.60326e-08	6.57811e-07	Fancl	protein_coding
ENSMUSG00000057715	5057.63	4358.43	5756.84	-0.399844	0.0715546	-5.56438	2.63083e-08	6.63889e-07	A830018L16Rik	protein_coding
ENSMUSG00000035486	146.527	207.199	85.8559	0.953056	0.167127	5.5636	2.64269e-08	6.6584e-07	Plk5	protein_coding
ENSMUSG00000109460	149.394	99.769	199.019	-0.826491	0.14492	-5.56341	2.64561e-08	6.6584e-07
ENSMUSG00000020808	85.5128	53.3786	117.647	-0.895662	0.157533	-5.56283	2.65431e-08	6.67142e-07	Pimreg	protein_coding
ENSMUSG00000028608	2177.72	2443.09	1912.34	0.351818	0.0627484	5.56062	2.68815e-08	6.73856e-07	0610037L13Rik	protein_coding
ENSMUSG00000031170	394.518	308.745	480.291	-0.572234	0.0965298	-5.56076	2.68609e-08	6.73856e-07	Slc38a5	protein_coding
ENSMUSG00000045095	5732.32	5095.22	6369.42	-0.305737	0.0538784	-5.55896	2.71391e-08	6.79412e-07	Magi1	protein_coding
ENSMUSG00000014077	3152.39	3548.79	2755.98	0.366167	0.0657136	5.55799	2.72902e-08	6.82292e-07	Chp1	protein_coding
ENSMUSG00000022358	514.65	407.66	621.639	-0.572376	0.101583	-5.54996	2.85742e-08	7.13449e-07	Fbxo32	protein_coding
ENSMUSG00000051238	497.135	586.757	407.513	0.486621	0.0838456	5.5492	2.86985e-08	7.15607e-07	Swsap1	protein_coding
ENSMUSG00000026885	833.139	978.634	687.645	0.485505	0.0862542	5.54471	2.94435e-08	7.33217e-07	Ttll11	protein_coding
ENSMUSG00000045348	3882.37	3101.56	4663.19	-0.548256	0.0964898	-5.54367	2.96199e-08	7.36639e-07	Nyap1	protein_coding
ENSMUSG00000004891	993.084	779.029	1207.14	-0.563382	0.0952577	-5.54289	2.97515e-08	7.38939e-07	Nes	protein_coding
ENSMUSG00000025161	187.502	251.438	123.566	0.840589	0.1453	5.54243	2.98299e-08	7.39915e-07	Slc16a3	protein_coding
ENSMUSG00000029121	21575.5	17851.6	25299.5	-0.478241	0.0847109	-5.53388	3.13218e-08	7.75903e-07	Crmp1	protein_coding
ENSMUSG00000031647	3129.95	2718.76	3541.15	-0.371123	0.0660291	-5.52944	3.21251e-08	7.94761e-07	Mfap3l	protein_coding
ENSMUSG00000020547	3221.26	2827.28	3615.24	-0.349509	0.0625701	-5.52805	3.23815e-08	8.00056e-07	Bzw2	protein_coding
ENSMUSG00000019810	1893.57	2116.82	1670.32	0.334911	0.0597168	5.5271	3.25576e-08	8.03356e-07	Fuca2	protein_coding
ENSMUSG00000031323	74.9723	105.82	44.125	0.947813	0.16404	5.52605	3.27514e-08	8.07086e-07	Dmrtc1a	protein_coding
ENSMUSG00000040935	61.0885	91.5145	30.6625	1.06945	0.177899	5.52249	3.34235e-08	8.22575e-07	Padi6	protein_coding
ENSMUSG00000079056	2409.13	2705.37	2112.88	0.347961	0.0621338	5.52109	3.36904e-08	8.28065e-07	Kcnip3	protein_coding
ENSMUSG00000014850	1950.1	2235.33	1664.88	0.400058	0.0702581	5.5147	3.49379e-08	8.57612e-07	Msh3	protein_coding
ENSMUSG00000030854	6322.46	5326.98	7317.94	-0.430335	0.0757001	-5.51419	3.50392e-08	8.58186e-07	Ptpn5	protein_coding
ENSMUSG00000057058	107.728	147.505	67.95	0.876998	0.157051	5.51412	3.50521e-08	8.58186e-07	Skap1	protein_coding
ENSMUSG00000053137	1257.94	1062.39	1453.49	-0.442372	0.079682	-5.51056	3.57687e-08	8.74597e-07	Mapk11	protein_coding
ENSMUSG00000022537	3506.81	3047.51	3966.1	-0.377306	0.0679738	-5.50857	3.61757e-08	8.83406e-07	Tmem44	protein_coding
ENSMUSG00000041571	24298.8	20841.1	27756.5	-0.408836	0.0738243	-5.50826	3.62394e-08	8.8382e-07	Selenow	protein_coding
ENSMUSG00000005125	818.458	590.236	1046.68	-0.71679	0.122745	-5.50471	3.69769e-08	9.00646e-07	Ndrg1	protein_coding
ENSMUSG00000025743	17079.6	14208.6	19950.7	-0.465753	0.0828685	-5.50315	3.73069e-08	9.07513e-07	Sdc3	protein_coding
ENSMUSG00000030301	1552.81	1885.33	1220.29	0.579588	0.102824	5.50171	3.76131e-08	9.13786e-07	Ccdc91	protein_coding
ENSMUSG00000079179	1694.27	1963.96	1424.58	0.427433	0.0743807	5.50145	3.76674e-08	9.1393e-07	Rab10os	antisense
ENSMUSG00000024150	1613.69	1811.1	1416.29	0.340314	0.0605867	5.49759	3.85019e-08	9.32979e-07	Mcfd2	protein_coding
ENSMUSG00000027531	2898.65	3237.47	2559.84	0.328479	0.0587962	5.49678	3.86786e-08	9.36062e-07	Impa1	protein_coding
ENSMUSG00000048327	215.075	156.696	273.453	-0.706711	0.126248	-5.4963	3.87835e-08	9.37399e-07	Ckap2l	protein_coding
ENSMUSG00000097080	192.671	241.159	144.182	0.668384	0.119568	5.49252	3.96248e-08	9.56511e-07	1700086O06Rik	lincRNA
ENSMUSG00000021470	1354.35	1584.48	1124.21	0.463405	0.0813693	5.48992	4.02107e-08	9.69416e-07	Ercc6l2	protein_coding
ENSMUSG00000032128	2486.83	1940.37	3033.29	-0.587685	0.103312	-5.48578	4.11646e-08	9.9115e-07	Robo3	protein_coding
ENSMUSG00000047417	2848.25	3167.62	2528.89	0.319673	0.0575555	5.4846	4.14409e-08	9.96531e-07	Rexo1	protein_coding
ENSMUSG00000085957	35.8699	56.966	14.7738	1.0449	0.191824	5.48331	4.17444e-08	1.00256e-06	Syna	protein_coding
ENSMUSG00000051934	1880.91	2103.58	1658.24	0.339429	0.0613234	5.48278	4.18696e-08	1.00429e-06	Spats2	protein_coding
ENSMUSG00000028069	950.888	774.01	1127.77	-0.501455	0.0880611	-5.48245	4.19478e-08	1.00489e-06	Gpatch4	protein_coding
ENSMUSG00000030077	17665.3	14922	20408.7	-0.442696	0.080307	-5.48059	4.23906e-08	1.01421e-06	Chl1	protein_coding
ENSMUSG00000022462	4132.63	3582.67	4682.6	-0.370331	0.06619	-5.47804	4.30062e-08	1.0272e-06	Slc38a2	protein_coding
ENSMUSG00000030098	1470.83	1262.49	1679.18	-0.404612	0.0733702	-5.47789	4.30424e-08	1.0272e-06	Grip2	protein_coding
ENSMUSG00000028248	14157.8	15541.8	12773.9	0.283902	0.0515121	5.47538	4.36584e-08	1.03875e-06	Pnisr	protein_coding
ENSMUSG00000033361	2319.05	2034.34	2603.75	-0.355001	0.0643726	-5.47544	4.36419e-08	1.03875e-06	Prrg3	protein_coding
ENSMUSG00000070705	1377.67	1557.8	1197.53	0.366227	0.065585	5.47524	4.36913e-08	1.03875e-06	Eid2b	protein_coding
ENSMUSG00000040990	2214.02	1908.6	2519.45	-0.381358	0.0679873	-5.47443	4.38932e-08	1.04224e-06	Sh3kbp1	protein_coding
ENSMUSG00000020212	643.798	744.918	542.678	0.439428	0.0785389	5.47322	4.41938e-08	1.04806e-06	Mdm1	protein_coding
ENSMUSG00000043424	336.523	247.424	425.622	-0.693189	0.131351	-5.47248	4.43769e-08	1.05109e-06	Eif3j2	protein_coding
ENSMUSG00000013698	21096.9	18797.6	23396.1	-0.315357	0.057236	-5.4698	4.50541e-08	1.06579e-06	Pea15a	protein_coding
ENSMUSG00000040640	12288.4	10862.3	13714.4	-0.339182	0.0617935	-5.46903	4.52503e-08	1.0691e-06	Erc2	protein_coding
ENSMUSG00000025731	790.785	920.987	660.582	0.454331	0.0810853	5.46614	4.59944e-08	1.08532e-06	Mettl26	protein_coding
ENSMUSG00000074129	553.308	441.871	664.745	-0.550415	0.0988074	-5.46281	4.68658e-08	1.1045e-06	Rpl13a	protein_coding
ENSMUSG00000027612	3395.94	2987.14	3804.73	-0.351346	0.0641873	-5.46161	4.71847e-08	1.11063e-06	Mmp24	protein_coding
ENSMUSG00000018340	2781.41	2468.06	3094.75	-0.316583	0.0570379	-5.46119	4.72941e-08	1.11182e-06	Anxa6	protein_coding
ENSMUSG00000029777	5262.04	4734.16	5789.92	-0.285561	0.0517155	-5.459	4.78836e-08	1.12428e-06	Gars	protein_coding
ENSMUSG00000005892	133.38	82.1785	184.581	-0.896221	0.16219	-5.45802	4.81477e-08	1.12908e-06	Trh	protein_coding
ENSMUSG00000032332	702.318	574.516	830.121	-0.476293	0.0815253	-5.45643	4.85812e-08	1.13783e-06	Col12a1	protein_coding
ENSMUSG00000034488	3782.64	3272.06	4293.22	-0.388171	0.0707096	-5.45472	4.90491e-08	1.14737e-06	Edil3	protein_coding
ENSMUSG00000003528	1907.04	1626.97	2187.12	-0.415437	0.0753784	-5.45022	5.03074e-08	1.17535e-06	Slc25a1	protein_coding
ENSMUSG00000041362	5463.05	4568.07	6358.04	-0.46328	0.084432	-5.44969	5.04579e-08	1.17741e-06	Shtn1	protein_coding
ENSMUSG00000029004	7219.21	6273.96	8164.46	-0.363125	0.0652627	-5.44277	5.24598e-08	1.22175e-06	Kmt2e	protein_coding
ENSMUSG00000096472	1572.08	1392.34	1751.83	-0.338567	0.0622587	-5.44267	5.2487e-08	1.22175e-06	Cdkn2d	protein_coding
ENSMUSG00000022043	6932.8	6163.49	7702.12	-0.315746	0.0573644	-5.43957	5.34096e-08	1.24169e-06	Trim35	protein_coding
ENSMUSG00000039323	2367.36	1975.32	2759.4	-0.475396	0.0882813	-5.43921	5.35183e-08	1.24269e-06	Igfbp2	protein_coding
ENSMUSG00000005043	334.511	413.564	255.459	0.622191	0.107142	5.43355	5.52436e-08	1.28118e-06	Sgsh	protein_coding
ENSMUSG00000026525	294.438	217.485	371.39	-0.685816	0.124201	-5.43322	5.53463e-08	1.28199e-06	Opn3	protein_coding
ENSMUSG00000028949	3687.43	4163.23	3211.62	0.355552	0.0638927	5.43227	5.56409e-08	1.28723e-06	Smarcd3	protein_coding
ENSMUSG00000035024	1457.85	1650.06	1265.65	0.369004	0.0666906	5.42529	5.78602e-08	1.33694e-06	Ncapd3	protein_coding
ENSMUSG00000033949	302.925	234.297	371.552	-0.605009	0.108787	-5.42454	5.8104e-08	1.34093e-06	Trim36	protein_coding
ENSMUSG00000030878	234.578	176.141	293.016	-0.656678	0.117921	-5.42372	5.83726e-08	1.34549e-06	Cdr2	protein_coding
ENSMUSG00000025034	2434.11	2104.26	2763.95	-0.376587	0.0680428	-5.42061	5.93949e-08	1.36738e-06	Trim8	protein_coding
ENSMUSG00000086555	213.549	281.959	145.14	0.795346	0.140243	5.41885	5.99851e-08	1.37929e-06	Gm13446	processed_transcript
ENSMUSG00000036377	5742.91	4663.98	6821.85	-0.507714	0.0904244	-5.41771	6.03683e-08	1.38642e-06	C530008M17Rik	protein_coding
ENSMUSG00000007036	2486.88	2798.93	2174.84	0.347601	0.0627585	5.41587	6.09929e-08	1.39906e-06	Abhd16a	protein_coding
ENSMUSG00000026163	10236.3	9105.13	11367.5	-0.31315	0.0570911	-5.41338	6.1845e-08	1.41689e-06	Sphkap	protein_coding
ENSMUSG00000037443	648.115	752.344	543.886	0.446298	0.0804174	5.41144	6.25208e-08	1.43064e-06	Cep85	protein_coding
ENSMUSG00000027712	1261.95	1070.5	1453.4	-0.416931	0.0748387	-5.4108	6.27447e-08	1.43402e-06	Anxa5	protein_coding
ENSMUSG00000074890	263.769	319.194	208.345	0.576438	0.106173	5.41015	6.29727e-08	1.4375e-06	Lcmt2	protein_coding
ENSMUSG00000029154	300.964	228.021	373.907	-0.644973	0.115792	-5.40943	6.32241e-08	1.44149e-06	Cwh43	protein_coding
ENSMUSG00000031755	1207.39	1382.96	1031.82	0.402463	0.0726185	5.40811	6.36922e-08	1.44867e-06	Bbs2	protein_coding
ENSMUSG00000070823	759.313	636.118	882.508	-0.44448	0.0797161	-5.40821	6.36595e-08	1.44867e-06	Gm1043	protein_coding
ENSMUSG00000031016	351.083	268.582	433.583	-0.627134	0.111092	-5.40786	6.37805e-08	1.44894e-06	Wee1	protein_coding
ENSMUSG00000023034	2008.97	2360.76	1657.18	0.476344	0.0852461	5.40651	6.42629e-08	1.45814e-06	Nr4a1	protein_coding
ENSMUSG00000003421	1732.37	1943.13	1521.62	0.335403	0.0604988	5.40596	6.44617e-08	1.4609e-06	Nosip	protein_coding
ENSMUSG00000030403	705.506	579.285	831.726	-0.484498	0.086605	-5.40475	6.48986e-08	1.46904e-06	Vasp	protein_coding
ENSMUSG00000036339	972.244	1210.94	733.548	0.651248	0.117145	5.40394	6.51939e-08	1.47396e-06	Tmem260	protein_coding
ENSMUSG00000036672	784.66	651.56	917.761	-0.46392	0.0834697	-5.40141	6.61202e-08	1.49312e-06	Cenpt	protein_coding
ENSMUSG00000009090	5797.34	6500.85	5093.84	0.347078	0.0636322	5.40115	6.62158e-08	1.49349e-06	Ap1b1	protein_coding
ENSMUSG00000068615	917.026	774.454	1059.6	-0.43584	0.0797051	-5.39943	6.68535e-08	1.50608e-06	Gjd2	protein_coding
ENSMUSG00000034317	314.424	246.021	382.827	-0.581594	0.102764	-5.39596	6.8159e-08	1.53366e-06	Trim59	protein_coding
ENSMUSG00000060038	1332.03	1150.3	1513.76	-0.397278	0.0737985	-5.39537	6.83827e-08	1.53686e-06	Dhps	protein_coding
ENSMUSG00000018293	3547.32	2981.38	4113.27	-0.434925	0.0781346	-5.38949	7.06577e-08	1.58611e-06	Pfn1	protein_coding
ENSMUSG00000024143	1456.86	1261.9	1651.83	-0.375631	0.0684881	-5.38826	7.11448e-08	1.59515e-06	Rhoq	protein_coding
ENSMUSG00000016624	605.845	725.606	486.085	0.542545	0.100181	5.38629	7.19289e-08	1.61081e-06	Phf21b	protein_coding
ENSMUSG00000035064	2110.65	1835.93	2385.38	-0.369346	0.0677301	-5.38549	7.22482e-08	1.61605e-06	Eef2k	protein_coding
ENSMUSG00000026814	1007.67	836.878	1178.45	-0.450205	0.0795331	-5.3825	7.34586e-08	1.64118e-06	Eng	protein_coding
ENSMUSG00000024646	2192.2	1857.97	2526.43	-0.42984	0.0788878	-5.37867	7.50394e-08	1.67452e-06	Cyb5a	protein_coding
ENSMUSG00000017679	3271.83	3647.84	2895.83	0.328186	0.0604017	5.37644	7.59743e-08	1.69338e-06	Ttpal	protein_coding
ENSMUSG00000013997	1796.42	2072.78	1520.07	0.429258	0.0784607	5.37389	7.70559e-08	1.71345e-06	Nit1	protein_coding
ENSMUSG00000017176	2047.61	1815.61	2279.62	-0.337792	0.0631215	-5.37404	7.69927e-08	1.71345e-06	Nt5c3b	protein_coding
ENSMUSG00000022948	405.577	481.125	330.03	0.507599	0.0917649	5.37331	7.73026e-08	1.71692e-06	Setd4	protein_coding
ENSMUSG00000006958	1378.92	1584.07	1173.78	0.425396	0.0788653	5.36948	7.89623e-08	1.75172e-06	Chrd	protein_coding
ENSMUSG00000026547	574.413	455.126	693.699	-0.549796	0.0971942	-5.36814	7.95549e-08	1.7628e-06	Tagln2	protein_coding
ENSMUSG00000031502	5185.62	4051.43	6319.82	-0.567988	0.0985067	-5.36688	8.01106e-08	1.77303e-06	Col4a1	protein_coding
ENSMUSG00000025597	546.551	456.591	636.512	-0.463886	0.0858819	-5.36322	8.17521e-08	1.80514e-06	Klhl4	protein_coding
ENSMUSG00000102312	243.105	188.771	297.44	-0.604888	0.112134	-5.36339	8.16763e-08	1.80514e-06	Pcdha3	protein_coding
ENSMUSG00000031451	4046.26	3644.59	4447.92	-0.295761	0.0551664	-5.36245	8.20999e-08	1.8107e-06	Gas6	protein_coding
ENSMUSG00000026463	11400.9	9084.44	13717.4	-0.544539	0.0976974	-5.35902	8.36746e-08	1.84328e-06	Atp2b4	protein_coding
ENSMUSG00000020358	6920.34	6144.59	7696.09	-0.321536	0.0594658	-5.35699	8.46208e-08	1.86195e-06	Hnrnpab	protein_coding
ENSMUSG00000039106	784.34	673.119	895.561	-0.403081	0.0742395	-5.35444	8.58228e-08	1.88621e-06	Htr5a	protein_coding
ENSMUSG00000019891	729.699	840.6	618.798	0.424258	0.077706	5.35374	8.61529e-08	1.89126e-06	Dcbld1	protein_coding
ENSMUSG00000105895	366.412	451.35	281.474	0.623074	0.113062	5.35121	8.737e-08	1.91575e-06
ENSMUSG00000062753	723.825	593.458	854.191	-0.498174	0.0915949	-5.35099	8.74721e-08	1.91577e-06	AI413582	protein_coding
ENSMUSG00000020368	15175.4	13759.1	16591.6	-0.257281	0.0473354	-5.34634	8.97525e-08	1.96311e-06	Canx	protein_coding
ENSMUSG00000058291	1597.5	1390.5	1804.49	-0.374444	0.0697063	-5.34616	8.98413e-08	1.96311e-06	Zfp68	protein_coding
ENSMUSG00000029576	537.739	434.661	640.817	-0.520851	0.0941327	-5.34521	9.03123e-08	1.97112e-06	Radil	protein_coding
ENSMUSG00000034308	429.562	503.554	355.57	0.478519	0.0879783	5.34496	9.04375e-08	1.97158e-06	Sdr42e1	protein_coding
ENSMUSG00000020193	125.101	165.945	84.2571	0.812946	0.14065	5.34337	9.12321e-08	1.98433e-06	Zpbp	protein_coding
ENSMUSG00000074749	505.019	594.185	415.852	0.479239	0.0866908	5.34358	9.11284e-08	1.98433e-06	Kiz	protein_coding
ENSMUSG00000032878	3760.44	3292.94	4227.93	-0.36894	0.0695521	-5.34143	9.22146e-08	2.00339e-06	Ccdc85a	protein_coding
ENSMUSG00000041079	587.052	687.433	486.67	0.464437	0.0837637	5.34051	9.26841e-08	2.01128e-06	Rwdd2b	protein_coding
ENSMUSG00000041765	1295.61	1464.38	1126.85	0.372127	0.0691289	5.33606	9.49875e-08	2.0589e-06	Ubac2	protein_coding
ENSMUSG00000039713	2380.33	2765.09	1995.56	0.462626	0.0874538	5.33418	9.59763e-08	2.07557e-06	Plekhg5	protein_coding
ENSMUSG00000057406	8127.11	7242.36	9011.85	-0.312903	0.05812	-5.33436	9.58808e-08	2.07557e-06	Nsd2	protein_coding
ENSMUSG00000006699	15154.8	13730.8	16578.9	-0.278435	0.0521119	-5.33162	9.7343e-08	2.10272e-06	Cdc42	protein_coding
ENSMUSG00000052336	1913.39	1603.53	2223.25	-0.45329	0.0839229	-5.32724	9.97144e-08	2.15149e-06	Cx3cr1	protein_coding
ENSMUSG00000078490	853.214	971.821	734.608	0.390095	0.0719266	5.32457	1.01191e-07	2.18085e-06	Cfap74	protein_coding
ENSMUSG00000034825	6760.77	5977.78	7543.76	-0.323058	0.0595651	-5.32359	1.01737e-07	2.19012e-06	Nrip3	protein_coding
ENSMUSG00000002341	14384.8	12563.3	16206.4	-0.342555	0.0625275	-5.31849	1.0463e-07	2.24898e-06	Ncan	protein_coding
ENSMUSG00000006522	595.94	717.817	474.063	0.547338	0.0995688	5.31836	1.04709e-07	2.24898e-06	Itih3	protein_coding
ENSMUSG00000040447	1713.99	1916.12	1511.87	0.332626	0.0615681	5.31652	1.05769e-07	2.26916e-06	Spns2	protein_coding
ENSMUSG00000050822	2248.76	1878.04	2619.47	-0.464822	0.0871019	-5.31431	1.07061e-07	2.29428e-06	Slc29a4	protein_coding
ENSMUSG00000110483	33.9984	54.9076	13.0891	1.07197	0.19242	5.31355	1.07513e-07	2.30136e-06
ENSMUSG00000006418	1767.37	2014.74	1520	0.388766	0.0715458	5.31325	1.0769e-07	2.30254e-06	Rnf114	protein_coding
ENSMUSG00000038777	1919.19	1609.92	2228.45	-0.449708	0.0835367	-5.30956	1.09887e-07	2.34687e-06	Sema6c	protein_coding
ENSMUSG00000022375	181.034	233.367	128.701	0.730446	0.133209	5.30851	1.10523e-07	2.35778e-06	Lrrc6	protein_coding
ENSMUSG00000079215	5249.67	5821.24	4678.11	0.313691	0.0585868	5.3063	1.11874e-07	2.38391e-06	Zfp664	protein_coding
ENSMUSG00000015222	60711.8	53521.8	67901.8	-0.338781	0.0631847	-5.30577	1.12198e-07	2.38812e-06	Map2	protein_coding
ENSMUSG00000025137	2628.4	2237.99	3018.81	-0.41476	0.0768117	-5.30381	1.1341e-07	2.41121e-06	Pcyt2	protein_coding
ENSMUSG00000033319	1368.83	1184.88	1552.78	-0.377254	0.0698579	-5.30292	1.13965e-07	2.42029e-06	Fem1c	protein_coding
ENSMUSG00000015217	478.372	393.944	562.8	-0.488123	0.091055	-5.29591	1.18428e-07	2.51224e-06	Hmgb3	protein_coding
ENSMUSG00000021662	1481.84	1203.24	1760.43	-0.512367	0.0944089	-5.29076	1.21807e-07	2.58102e-06	Arhgef28	protein_coding
ENSMUSG00000113679	101.159	134.612	67.7061	0.817144	0.14602	5.28847	1.23344e-07	2.61066e-06	Gm10432
ENSMUSG00000018042	2846.72	3182	2511.44	0.328987	0.0610074	5.28697	1.24357e-07	2.62917e-06	Cyb5r3	protein_coding
ENSMUSG00000028082	2397.34	1965.06	2829.61	-0.500764	0.0938305	-5.28603	1.25001e-07	2.63982e-06	Sh3d19	protein_coding
ENSMUSG00000050821	13907	15894.5	11919.5	0.403125	0.0753013	5.28524	1.25537e-07	2.64819e-06	Fam131a	protein_coding
ENSMUSG00000061298	507.871	597.762	417.98	0.495954	0.0945088	5.2818	1.2792e-07	2.69545e-06	Agbl4	protein_coding
ENSMUSG00000086363	267.224	205.833	328.615	-0.610157	0.111799	-5.28011	1.29103e-07	2.71735e-06	A330102I10Rik	lincRNA
ENSMUSG00000022490	4408.94	3935.5	4882.38	-0.320072	0.0607914	-5.27878	1.30044e-07	2.73411e-06	Ppp1r1a	protein_coding
ENSMUSG00000030092	1780.51	1550.84	2010.17	-0.369997	0.0694718	-5.27758	1.30904e-07	2.74912e-06	Cntn6	protein_coding
ENSMUSG00000030881	5052.27	5613.16	4491.39	0.309902	0.0577007	5.27721	1.31168e-07	2.75162e-06	Arfip2	protein_coding
ENSMUSG00000022340	5588.08	5048.24	6127.91	-0.277054	0.0520212	-5.27682	1.31446e-07	2.75439e-06	Sybu	protein_coding
ENSMUSG00000050332	1076.2	906.065	1246.33	-0.444658	0.0835145	-5.27593	1.32085e-07	2.76471e-06	Amer1	protein_coding
ENSMUSG00000008475	6400.63	5534.33	7266.92	-0.387304	0.0728985	-5.27266	1.34457e-07	2.80855e-06	Arpc5	protein_coding
ENSMUSG00000109536	1364.82	1136.38	1593.27	-0.469183	0.0882096	-5.27264	1.34477e-07	2.80855e-06
ENSMUSG00000027778	1067.46	1204.61	930.316	0.362218	0.0675495	5.27187	1.35044e-07	2.81729e-06	Ift80	protein_coding
ENSMUSG00000040749	227.434	282.793	172.076	0.635527	0.113965	5.27078	1.35846e-07	2.83089e-06	Siah1b	protein_coding
ENSMUSG00000060671	3217.35	2856.58	3578.11	-0.307668	0.0570786	-5.26811	1.37836e-07	2.8692e-06	Atp8b2	protein_coding
ENSMUSG00000028771	2018.64	1788.13	2249.16	-0.325364	0.0610393	-5.26761	1.38209e-07	2.87381e-06	Ptpn12	protein_coding
ENSMUSG00000018537	1629.02	1412.01	1846.03	-0.368814	0.0684252	-5.26631	1.39191e-07	2.89104e-06	Pcgf2	protein_coding
ENSMUSG00000025551	1561.99	1385.51	1738.47	-0.334415	0.0635654	-5.26232	1.42249e-07	2.95132e-06	Fgf14	protein_coding
ENSMUSG00000024897	15498.1	13827	17169.1	-0.311135	0.058677	-5.26181	1.42646e-07	2.95631e-06	Apba1	protein_coding
ENSMUSG00000052726	2038.88	1761.56	2316.19	-0.396198	0.0755313	-5.2544	1.48509e-07	3.07445e-06	Kcnt2	protein_coding
ENSMUSG00000044042	714.673	840.885	588.461	0.482373	0.0892265	5.25399	1.48838e-07	3.07788e-06	Fmn1	protein_coding
ENSMUSG00000029064	34666.3	31256	38076.6	-0.282846	0.0533829	-5.25209	1.50385e-07	3.10649e-06	Gnb1	protein_coding
ENSMUSG00000029335	755.773	627.077	884.47	-0.470963	0.0877797	-5.25181	1.50608e-07	3.10768e-06	Bmp3	protein_coding
ENSMUSG00000021557	12563.7	11349	13778.3	-0.286693	0.0545424	-5.24926	1.52712e-07	3.14081e-06	Agtpbp1	protein_coding
ENSMUSG00000035769	336.171	399.98	272.363	0.527536	0.101694	5.24936	1.52632e-07	3.14081e-06	Xylb	protein_coding
ENSMUSG00000086477	275.763	332.767	218.759	0.562278	0.104702	5.24942	1.52581e-07	3.14081e-06		processed_transcript
ENSMUSG00000001323	6681.63	7469.09	5894.17	0.326543	0.0609462	5.24634	1.55151e-07	3.18751e-06	Srr	protein_coding
ENSMUSG00000028873	181.78	134.258	229.302	-0.6772	0.126737	-5.24004	1.60544e-07	3.29473e-06	Cdca8	protein_coding
ENSMUSG00000026509	3034.06	2687.36	3380.76	-0.314545	0.0587493	-5.23568	1.64376e-07	3.36971e-06	Capn2	protein_coding
ENSMUSG00000024357	686.884	812.811	560.958	0.493309	0.0909338	5.2312	1.68413e-07	3.44873e-06	Sil1	protein_coding
ENSMUSG00000051527	2491.7	1927.21	3056.19	-0.601759	0.111542	-5.22955	1.69923e-07	3.47589e-06	Usp29	protein_coding
ENSMUSG00000061119	725.206	617.253	833.159	-0.410921	0.0764566	-5.22836	1.71017e-07	3.49447e-06	Prcp	protein_coding
ENSMUSG00000078532	812.017	670.601	953.433	-0.480675	0.0906548	-5.22756	1.71766e-07	3.50599e-06	Nkain1	protein_coding
ENSMUSG00000031790	1369.47	1133.49	1605.44	-0.472163	0.0882359	-5.22713	1.72157e-07	3.51018e-06	Mmp15	protein_coding
ENSMUSG00000019647	2931.51	2415.49	3447.53	-0.480341	0.089512	-5.21932	1.79577e-07	3.65754e-06	Sema6a	protein_coding
ENSMUSG00000041417	9130.87	8211.6	10050.2	-0.291368	0.055442	-5.2164	1.82436e-07	3.71176e-06	Pik3r1	protein_coding
ENSMUSG00000104237	97.8457	131.255	64.4364	0.835338	0.150255	5.21329	1.85523e-07	3.77051e-06		lincRNA
ENSMUSG00000001794	4324.26	3691.46	4957.06	-0.395649	0.0732641	-5.21297	1.85839e-07	3.77287e-06	Capns1	protein_coding
ENSMUSG00000027890	432.838	507.705	357.972	0.47732	0.0890204	5.21188	1.86941e-07	3.79089e-06	Gstm4	protein_coding
ENSMUSG00000051351	3843.03	4232.57	3453.5	0.291573	0.0554125	5.21169	1.87128e-07	3.79089e-06	Zfp46	protein_coding
ENSMUSG00000106981	304.552	371.878	237.226	0.589624	0.111161	5.21094	1.87886e-07	3.80218e-06
ENSMUSG00000052684	1643.08	1371.8	1914.36	-0.441983	0.0812791	-5.20991	1.88936e-07	3.81933e-06	Jun	protein_coding
ENSMUSG00000040797	4702.54	5324.53	4080.54	0.388669	0.0752939	5.20919	1.89666e-07	3.83001e-06	Iqsec3	protein_coding
ENSMUSG00000069495	2616.66	2931.18	2302.13	0.339275	0.0641701	5.20673	1.92202e-07	3.87707e-06	Epc2	protein_coding
ENSMUSG00000036856	829.501	696.854	962.147	-0.440096	0.0825015	-5.20514	1.93851e-07	3.90615e-06	Wnt4	protein_coding
ENSMUSG00000038260	940.824	803.316	1078.33	-0.414316	0.0791947	-5.20146	1.97724e-07	3.97996e-06	Trpm4	protein_coding
ENSMUSG00000022197	5983.27	5259.7	6706.83	-0.358086	0.0692063	-5.20078	1.98453e-07	3.99039e-06	Pdzd2	protein_coding
ENSMUSG00000030443	489.066	409.098	569.034	-0.449171	0.0841151	-5.20015	1.99128e-07	3.9997e-06	Zfp583	protein_coding
ENSMUSG00000048920	2242.01	2568.09	1915.94	0.391267	0.072361	5.19646	2.03115e-07	4.07546e-06	Fkrp	protein_coding
ENSMUSG00000039542	17079.5	14228	19930.9	-0.451495	0.0838375	-5.19308	2.06838e-07	4.14576e-06	Ncam1	protein_coding
ENSMUSG00000066152	312.226	249.754	374.699	-0.54332	0.103067	-5.1896	2.10745e-07	4.21959e-06	Slc31a2	protein_coding
ENSMUSG00000028779	1303.98	1473.65	1134.31	0.366734	0.0695491	5.1889	2.1154e-07	4.23102e-06	Pef1	protein_coding
ENSMUSG00000039372	2713.12	2403.75	3022.49	-0.324385	0.0617857	-5.18705	2.13653e-07	4.26877e-06	March4	protein_coding
ENSMUSG00000039830	1388.81	1180.5	1597.13	-0.429952	0.0831588	-5.18444	2.16664e-07	4.32435e-06	Olig2	protein_coding
ENSMUSG00000032579	656.867	759.42	554.314	0.431635	0.0813635	5.18318	2.18136e-07	4.34915e-06	Hemk1	protein_coding
ENSMUSG00000032312	1715.99	1495.89	1936.09	-0.369361	0.0709995	-5.18252	2.18913e-07	4.36004e-06	Csk	protein_coding
ENSMUSG00000025083	850.398	725.633	975.164	-0.405675	0.0764421	-5.18028	2.21558e-07	4.40808e-06	Afap1l2	protein_coding
ENSMUSG00000038115	106.681	153.043	60.3189	0.952313	0.175399	5.18003	2.21849e-07	4.40921e-06	Ano2	protein_coding
ENSMUSG00000074480	682.132	532.456	831.808	-0.582233	0.109053	-5.17237	2.31139e-07	4.58903e-06	Mex3a	protein_coding
ENSMUSG00000028057	1073.47	918.237	1228.7	-0.417377	0.0807759	-5.17091	2.32951e-07	4.62015e-06	Rit1	protein_coding
ENSMUSG00000037999	3708.19	3295.12	4121.27	-0.324766	0.062599	-5.16541	2.39917e-07	4.75332e-06	Arap2	protein_coding
ENSMUSG00000054792	2253.07	1973.51	2532.63	-0.347879	0.0662238	-5.16413	2.41565e-07	4.78097e-06	Klhl18	protein_coding
ENSMUSG00000051343	2377.87	2049.21	2706.53	-0.379338	0.0714876	-5.16295	2.43089e-07	4.80609e-06	Rab11fip5	protein_coding
ENSMUSG00000080268	520.111	626.9	413.323	0.550904	0.104065	5.16235	2.43871e-07	4.81651e-06	Brms1	protein_coding
ENSMUSG00000055022	26288.8	23548.5	29029	-0.306622	0.0593177	-5.16036	2.46469e-07	4.86275e-06	Cntn1	protein_coding
ENSMUSG00000059839	548.252	447.162	649.343	-0.508932	0.0979734	-5.15768	2.50024e-07	4.92774e-06	Zfp874b	protein_coding
ENSMUSG00000032245	420.778	505.848	335.709	0.542884	0.101901	5.15647	2.51646e-07	4.95453e-06	Cln6	protein_coding
ENSMUSG00000056895	425.018	345.217	504.819	-0.514279	0.0984172	-5.15603	2.52241e-07	4.96109e-06	Hist3h2ba	protein_coding
ENSMUSG00000097466	168.387	127.032	209.742	-0.644788	0.121978	-5.15459	2.5419e-07	4.99422e-06	D430036J16Rik	antisense
ENSMUSG00000058454	2182.37	1898.53	2466.21	-0.371344	0.071493	-5.15378	2.55286e-07	5.01056e-06	Dhcr7	protein_coding
ENSMUSG00000030091	2357.46	2700.1	2014.81	0.416346	0.080734	5.15188	2.57888e-07	5.05636e-06	Nup210	protein_coding
ENSMUSG00000022285	18539.7	16762.7	20316.6	-0.254445	0.0482034	-5.15052	2.59758e-07	5.08777e-06	Ywhaz	protein_coding
ENSMUSG00000097195	494.613	403.72	585.507	-0.496698	0.0934222	-5.14924	2.61542e-07	5.11741e-06	Snhg5	processed_transcript
ENSMUSG00000022707	798.861	929.018	668.704	0.434653	0.0805819	5.14771	2.6369e-07	5.15408e-06	Gbe1	protein_coding
ENSMUSG00000105449	222.15	280.137	164.163	0.678499	0.127308	5.14693	2.64785e-07	5.17014e-06
ENSMUSG00000042901	1356.05	1187.65	1524.45	-0.354126	0.0680676	-5.14537	2.67e-07	5.20801e-06	Aida	protein_coding
ENSMUSG00000020458	28902.8	26151.8	31653.7	-0.265429	0.0508207	-5.14318	2.70122e-07	5.26348e-06	Rtn4	protein_coding
ENSMUSG00000040086	37.8328	56.7969	18.8688	0.961137	0.187778	5.13913	2.76013e-07	5.37272e-06	Tnni3k	protein_coding
ENSMUSG00000112278	117.712	157.717	77.7059	0.812078	0.153173	5.13874	2.76588e-07	5.37838e-06
ENSMUSG00000020080	700.679	851.351	550.007	0.573388	0.109004	5.13846	2.76998e-07	5.38082e-06	Hkdc1	protein_coding
ENSMUSG00000026450	46.5803	68.5047	24.656	0.992512	0.178968	5.13357	2.84295e-07	5.51689e-06	Chit1	protein_coding
ENSMUSG00000030911	46.8661	69.5607	24.1716	0.972534	0.185436	5.13272	2.85583e-07	5.53054e-06	Zp2	protein_coding
ENSMUSG00000039199	1218.88	1378.08	1059.67	0.369823	0.0711163	5.1328	2.85458e-07	5.53054e-06	Zdhhc1	protein_coding
ENSMUSG00000003271	248.284	311.514	185.054	0.653217	0.119321	5.13087	2.884e-07	5.57937e-06	Sult2b1	protein_coding
ENSMUSG00000078851	620.19	512.172	728.209	-0.470595	0.0886113	-5.12919	2.90985e-07	5.62363e-06	Hist3h2a	protein_coding
ENSMUSG00000102543	1841.98	2202.36	1481.59	0.53334	0.102852	5.12866	2.91809e-07	5.63378e-06	Pcdhgc5	protein_coding
ENSMUSG00000025366	469.113	385.552	552.674	-0.486186	0.0923365	-5.12716	2.94144e-07	5.67307e-06	Esyt1	protein_coding
ENSMUSG00000054976	2706.66	2386.93	3026.39	-0.33896	0.0654524	-5.12539	2.96929e-07	5.72096e-06	Nyap2	protein_coding
ENSMUSG00000033102	297.457	364.798	230.116	0.597364	0.112366	5.12097	3.03963e-07	5.85051e-06	Cdc14b	protein_coding
ENSMUSG00000025529	1397.93	1214.42	1581.43	-0.371522	0.0716497	-5.11898	3.07194e-07	5.90669e-06	Zfp711	protein_coding
ENSMUSG00000055493	1829.25	2044.78	1613.73	0.327177	0.0625862	5.11658	3.11121e-07	5.97611e-06	Epm2a	protein_coding
ENSMUSG00000027030	2328.41	2063.6	2593.21	-0.321239	0.0618157	-5.11613	3.11867e-07	5.98437e-06	Stk39	protein_coding
ENSMUSG00000071103	281.034	342.811	219.257	0.592327	0.114096	5.11565	3.12657e-07	5.99345e-06	1700029J07Rik	protein_coding
ENSMUSG00000031012	5954.95	5400.34	6509.57	-0.268254	0.0520373	-5.11164	3.19371e-07	6.11593e-06	Cask	protein_coding
ENSMUSG00000027188	1151.33	989.56	1313.1	-0.39995	0.0775887	-5.10479	3.31167e-07	6.33542e-06	Pamr1	protein_coding
ENSMUSG00000020658	7412.41	6546.82	8277.99	-0.319145	0.0609822	-5.10217	3.35773e-07	6.41703e-06	Efr3b	protein_coding
ENSMUSG00000015189	4151.69	4617.27	3686.1	0.3006	0.0572105	5.09912	3.41237e-07	6.51488e-06	Casd1	protein_coding
ENSMUSG00000034110	680.248	577.883	782.612	-0.421871	0.0818067	-5.09784	3.43557e-07	6.55255e-06	Kctd7	protein_coding
ENSMUSG00000018217	650.869	535.162	766.576	-0.485582	0.0929443	-5.0966	3.45803e-07	6.58874e-06	Pmp22	protein_coding
ENSMUSG00000074259	601.594	515.329	687.86	-0.40368	0.0780672	-5.09602	3.46869e-07	6.60239e-06	Gramd2	protein_coding
ENSMUSG00000031628	2299.27	1944.03	2654.51	-0.44144	0.0871041	-5.09481	3.49085e-07	6.63591e-06	Casp3	protein_coding
ENSMUSG00000044475	840.631	952.779	728.484	0.382457	0.0747551	5.09468	3.49332e-07	6.63591e-06	Ascc1	protein_coding
ENSMUSG00000022237	869.95	1063.98	675.921	0.599158	0.12141	5.09382	3.50924e-07	6.65945e-06	Ankrd33b	protein_coding
ENSMUSG00000107108	41.4547	22.1446	60.7649	-0.93809	0.18477	-5.09079	3.56573e-07	6.75987e-06	Gm9936
ENSMUSG00000104807	92.8189	127.563	58.0748	0.869082	0.163628	5.08447	3.68653e-07	6.98188e-06
ENSMUSG00000073418	226.166	299.513	152.82	0.792495	0.150544	5.0835	3.7054e-07	7.01058e-06	C4b	protein_coding
ENSMUSG00000020866	7383.64	6428.67	8338.62	-0.3664	0.0712642	-5.08256	3.72382e-07	7.0384e-06	Cacna1g	protein_coding
ENSMUSG00000042284	1065.63	913.871	1217.39	-0.378938	0.071278	-5.07969	3.78051e-07	7.13841e-06	Itga1	protein_coding
ENSMUSG00000032174	8350.11	9658.04	7042.19	0.444343	0.0876285	5.0766	3.84241e-07	7.24804e-06	Icam5	protein_coding
ENSMUSG00000024892	2049.07	2295.22	1802.91	0.334296	0.0645542	5.074	3.89539e-07	7.33334e-06	Pcx	protein_coding
ENSMUSG00000073591	752.834	642.353	863.315	-0.399353	0.0758781	-5.07419	3.89153e-07	7.33334e-06	Pcdhb22	protein_coding
ENSMUSG00000030609	746.055	632.422	859.688	-0.43161	0.084841	-5.06942	3.99027e-07	7.50448e-06	Aen	protein_coding
ENSMUSG00000035041	43.3744	64.2879	22.461	0.968337	0.184275	5.06613	4.05978e-07	7.62763e-06	Creb3l3	protein_coding
ENSMUSG00000014852	60.6438	87.5981	33.6896	0.967121	0.173232	5.06479	4.08853e-07	7.67401e-06	Adamts13	protein_coding
ENSMUSG00000038252	1290.25	1129.09	1451.4	-0.344204	0.0663254	-5.06364	4.11318e-07	7.70498e-06	Ncapd2	protein_coding
ENSMUSG00000041264	2010.18	1769.86	2250.5	-0.346427	0.0682073	-5.06365	4.11299e-07	7.70498e-06	Uspl1	protein_coding
ENSMUSG00000020290	5212.62	4588.93	5836.32	-0.341231	0.0666693	-5.06303	4.12648e-07	7.72223e-06	Xpo1	protein_coding
ENSMUSG00000022391	6056.42	5202.36	6910.48	-0.383162	0.0732968	-5.06202	4.14836e-07	7.75551e-06	Rangap1	protein_coding
ENSMUSG00000027715	451.026	376.415	525.638	-0.464278	0.0918211	-5.05935	4.20687e-07	7.85711e-06	Ccna2	protein_coding
ENSMUSG00000020107	1991.39	2239.61	1743.17	0.343488	0.0661848	5.05879	4.21921e-07	7.87239e-06	Anapc16	protein_coding
ENSMUSG00000027932	271.024	206.881	335.167	-0.615386	0.116897	-5.05803	4.23599e-07	7.88157e-06	Slc27a3	protein_coding
ENSMUSG00000036737	2768.55	2478.21	3058.9	-0.291698	0.0565927	-5.05801	4.23664e-07	7.88157e-06	Oxsr1	protein_coding
ENSMUSG00000046854	248.932	191.196	306.669	-0.60815	0.116037	-5.05806	4.23542e-07	7.88157e-06	Pip5kl1	protein_coding
ENSMUSG00000040105	1881.57	2115.25	1647.88	0.360116	0.0710677	5.05686	4.26222e-07	7.92137e-06	Plpp6	protein_coding
ENSMUSG00000031799	1289.51	1074.2	1504.82	-0.457478	0.0882457	-5.05559	4.29073e-07	7.96651e-06	Tpm4	protein_coding
ENSMUSG00000030729	34856.5	30656.3	39056.7	-0.346879	0.0681519	-5.05433	4.31906e-07	8.01125e-06	Pgm2l1	protein_coding
ENSMUSG00000026185	7831.18	6538.98	9123.39	-0.456042	0.0886334	-5.05202	4.37163e-07	8.10081e-06	Igfbp5	protein_coding
ENSMUSG00000019461	966.576	813.8	1119.35	-0.42944	0.0823559	-5.05119	4.39059e-07	8.12797e-06	Plscr3	protein_coding
ENSMUSG00000034958	10696.7	9690.58	11702.7	-0.268716	0.0526629	-5.05014	4.41495e-07	8.16507e-06	Atcay	protein_coding
ENSMUSG00000024127	11483.9	9951.47	13016.3	-0.369363	0.0714905	-5.04908	4.43941e-07	8.1998e-06	Prepl	protein_coding
ENSMUSG00000034993	1790.01	1496.58	2083.44	-0.447399	0.0861308	-5.04895	4.44241e-07	8.1998e-06	Vat1	protein_coding
ENSMUSG00000021901	6403.49	7062.97	5744.01	0.284017	0.0551687	5.04556	4.52196e-07	8.33849e-06	Bap1	protein_coding
ENSMUSG00000017715	2473.1	2742.12	2204.09	0.301954	0.058657	5.04468	4.54269e-07	8.36856e-06	Pgs1	protein_coding
ENSMUSG00000061603	14554.6	13184.7	15924.5	-0.276593	0.0546377	-5.04398	4.55958e-07	8.39149e-06	Akap6	protein_coding
ENSMUSG00000032482	17426.8	15430.6	19423	-0.3275	0.0643487	-5.03889	4.68229e-07	8.60894e-06	Cspg5	protein_coding
ENSMUSG00000043463	1230.83	1050.24	1411.43	-0.409382	0.0799956	-5.0371	4.7263e-07	8.68142e-06	Rab9b	protein_coding
ENSMUSG00000008307	283.159	343.302	223.016	0.56369	0.107515	5.03408	4.80149e-07	8.8043e-06	1700109H08Rik	protein_coding
ENSMUSG00000024799	1279.77	1084.03	1475.52	-0.422841	0.0822363	-5.03404	4.80252e-07	8.8043e-06	Vps51	protein_coding
ENSMUSG00000024381	6431.76	5530.53	7332.98	-0.383472	0.0740927	-5.03229	4.84663e-07	8.85557e-06	Bin1	protein_coding
ENSMUSG00000032182	575.348	667.094	483.601	0.444689	0.0867164	5.03257	4.83944e-07	8.85557e-06	Yipf2	protein_coding
ENSMUSG00000033420	991.264	862.271	1120.26	-0.358628	0.0694579	-5.0325	4.84116e-07	8.85557e-06	Antxr1	protein_coding
ENSMUSG00000048755	713.431	812.557	614.304	0.389471	0.0760247	5.03218	4.84922e-07	8.85557e-06	Mcat	protein_coding
ENSMUSG00000028199	630.614	731.016	530.212	0.430269	0.0821693	5.0313	4.87171e-07	8.87948e-06	Cryz	protein_coding
ENSMUSG00000028843	2747.45	2397.41	3097.49	-0.360841	0.070767	-5.03148	4.86704e-07	8.87948e-06	Sh3bgrl3	protein_coding
ENSMUSG00000015745	1185.4	1030.54	1340.26	-0.366009	0.0714709	-5.03068	4.88735e-07	8.8994e-06	Plekho1	protein_coding
ENSMUSG00000087694	416.341	350.17	482.512	-0.447358	0.0882296	-5.02928	4.92336e-07	8.95634e-06	A530058N18Rik	processed_transcript
ENSMUSG00000051950	1610.5	1396.43	1824.57	-0.367413	0.0713423	-5.02827	4.94924e-07	8.99477e-06	B3glct	protein_coding
ENSMUSG00000011589	1806.17	1568.33	2044.01	-0.378573	0.0751918	-5.02197	5.1145e-07	9.28444e-06	Fsd1	protein_coding
ENSMUSG00000024621	2804.64	2475.93	3133.35	-0.331372	0.0650095	-5.02182	5.11845e-07	9.28444e-06	Csf1r	protein_coding
ENSMUSG00000021094	477.475	561.954	392.995	0.477668	0.091855	5.02147	5.12782e-07	9.29251e-06	Dhrs7	protein_coding
ENSMUSG00000050708	1632.94	1386.41	1879.48	-0.435308	0.0879096	-5.01653	5.26121e-07	9.52511e-06	Ftl1	protein_coding
ENSMUSG00000001416	4251.37	3825.98	4676.75	-0.29218	0.0579942	-5.01546	5.29056e-07	9.56907e-06	Cct3	protein_coding
ENSMUSG00000020737	3111.45	2681.72	3541.18	-0.392424	0.0777164	-5.01456	5.31553e-07	9.60505e-06	Jpt1	protein_coding
ENSMUSG00000024059	2607.77	2957.55	2257.99	0.37029	0.072124	5.01256	5.37117e-07	9.69632e-06	Clip4	protein_coding
ENSMUSG00000006731	3821.84	3397.75	4245.94	-0.309359	0.0605491	-5.01219	5.38133e-07	9.7054e-06	B4galnt1	protein_coding
ENSMUSG00000027900	1182.98	1047.97	1317.98	-0.328621	0.0649821	-5.01119	5.40931e-07	9.74656e-06	Dram2	protein_coding
ENSMUSG00000025268	2531.6	2160.96	2902.25	-0.409848	0.0806966	-5.01088	5.41806e-07	9.75303e-06	Maged2	protein_coding
ENSMUSG00000020649	229.823	180.312	279.334	-0.570879	0.110782	-5.01032	5.4339e-07	9.77223e-06	Rrm2	protein_coding
ENSMUSG00000007850	11544	10355.2	12732.9	-0.28754	0.0564327	-5.00923	5.46478e-07	9.81842e-06	Hnrnph1	protein_coding
ENSMUSG00000022799	1531.46	1338.77	1724.14	-0.343463	0.0665359	-5.00871	5.47962e-07	9.82676e-06	Arhgap31	protein_coding
ENSMUSG00000040693	250.904	181.759	320.049	-0.696507	0.140583	-5.0087	5.47982e-07	9.82676e-06	Slco4c1	protein_coding
ENSMUSG00000050545	376.4	447.713	305.087	0.514768	0.0996815	5.007	5.52848e-07	9.90463e-06	Fam228b	protein_coding
ENSMUSG00000001924	11771.3	10057.7	13484.9	-0.390226	0.0749193	-5.00636	5.54682e-07	9.9269e-06	Uba1	protein_coding
ENSMUSG00000042817	159.771	112.455	207.087	-0.74045	0.140321	-5.0062	5.55142e-07	9.9269e-06	Flt3	protein_coding
ENSMUSG00000036452	4977.82	4484.82	5470.81	-0.278645	0.0548348	-5.0054	5.57457e-07	9.94947e-06	Arhgap26	protein_coding
ENSMUSG00000039347	18463.8	20303	16624.7	0.286518	0.0567565	5.00554	5.57051e-07	9.94947e-06	Atp6v0e2	protein_coding
ENSMUSG00000037348	1503.87	1289.19	1718.55	-0.397534	0.0778924	-5.00518	5.58103e-07	9.95161e-06	Paqr7	protein_coding
ENSMUSG00000042590	3374.31	3020.09	3728.52	-0.306709	0.0610513	-5.00419	5.60974e-07	9.99338e-06	Ipo11	protein_coding
ENSMUSG00000021693	6401.3	5745.2	7057.4	-0.289234	0.056988	-5.00249	5.6596e-07	1.00727e-05	Kif2a	protein_coding
ENSMUSG00000003865	783.5	668.08	898.921	-0.400056	0.0773876	-4.99832	5.78316e-07	1.02829e-05	Gys1	protein_coding
ENSMUSG00000022781	2593.35	2324.65	2862.04	-0.293108	0.0578087	-4.99748	5.80834e-07	1.03083e-05	Pak2	protein_coding
ENSMUSG00000031503	4081.92	3283.06	4880.77	-0.496518	0.0908734	-4.99758	5.80528e-07	1.03083e-05	Col4a2	protein_coding
ENSMUSG00000091337	14727.8	13004.4	16451.1	-0.343333	0.0687916	-4.99662	5.83425e-07	1.03446e-05	Eid1	protein_coding
ENSMUSG00000001018	2020.52	2310.82	1730.22	0.395153	0.0771709	4.99338	5.93307e-07	1.05099e-05	Snapin	protein_coding
ENSMUSG00000049521	405.616	339.544	471.687	-0.458618	0.0924469	-4.99226	5.9676e-07	1.05612e-05	Cdc42ep1	protein_coding
ENSMUSG00000054051	2094.98	2320.74	1869.22	0.307609	0.0609517	4.9908	6.0129e-07	1.06314e-05	Ercc6	protein_coding
ENSMUSG00000038280	2498.3	2806	2190.59	0.346288	0.0683645	4.98766	6.11165e-07	1.07959e-05	Ostm1	protein_coding
ENSMUSG00000038827	2026.93	2264.68	1789.18	0.325785	0.0640198	4.98353	6.24361e-07	1.10187e-05	Fam206a	protein_coding
ENSMUSG00000022761	5533.73	4879.59	6187.86	-0.33761	0.0671275	-4.9802	6.3519e-07	1.11994e-05	Lztr1	protein_coding
ENSMUSG00000038241	2018.81	1741.52	2296.09	-0.372134	0.0723451	-4.97824	6.41649e-07	1.13027e-05	Cep250	protein_coding
ENSMUSG00000039530	7879.48	8698.08	7060.88	0.278761	0.0545257	4.97363	6.57119e-07	1.15644e-05	Tusc3	protein_coding
ENSMUSG00000026554	6628.31	7319.89	5936.74	0.289629	0.0571544	4.97344	6.57755e-07	1.15649e-05	Dcaf8	protein_coding
ENSMUSG00000029076	7294.57	7936	6653.14	0.242178	0.0478821	4.97226	6.61753e-07	1.16243e-05	Sdf4	protein_coding
ENSMUSG00000025982	17806.4	19520.6	16092.3	0.272794	0.0541887	4.97079	6.66817e-07	1.17003e-05	Sf3b1	protein_coding
ENSMUSG00000070461	762.686	863.025	662.346	0.380239	0.07652	4.97064	6.67317e-07	1.17003e-05		sense_overlapping
ENSMUSG00000068196	337.157	262.279	412.035	-0.590545	0.117353	-4.97016	6.68963e-07	1.17183e-05	Col8a1	protein_coding
ENSMUSG00000031409	1321.16	1513.51	1128.81	0.413418	0.082671	4.96778	6.77236e-07	1.18523e-05	Tceal6	protein_coding
ENSMUSG00000024451	615.911	517.4	714.422	-0.432103	0.0836354	-4.96649	6.81756e-07	1.19203e-05	Arap3	protein_coding
ENSMUSG00000001082	721.362	616.687	826.038	-0.410443	0.0821113	-4.96544	6.85457e-07	1.19519e-05	Mfsd10	protein_coding
ENSMUSG00000024142	1770.4	1993.94	1546.85	0.355159	0.0703978	4.96556	6.85028e-07	1.19519e-05	Mlst8	protein_coding
ENSMUSG00000039385	3077.77	2745.97	3409.58	-0.314002	0.0629687	-4.96549	6.85277e-07	1.19519e-05	Cdh6	protein_coding
ENSMUSG00000022055	15171.8	13469	16874.6	-0.321869	0.0642863	-4.96257	6.95665e-07	1.21187e-05	Nefl	protein_coding
ENSMUSG00000102206	163.847	125.926	201.768	-0.61501	0.125855	-4.96171	6.98749e-07	1.21612e-05	Pcdha11	protein_coding
ENSMUSG00000031723	658.586	761.727	555.445	0.422985	0.0820192	4.9595	7.06732e-07	1.22888e-05	Txnl4b	protein_coding
ENSMUSG00000045589	11476.1	13098.9	9853.31	0.389102	0.0764555	4.95919	7.07875e-07	1.22974e-05	Frrs1l	protein_coding
ENSMUSG00000026500	444.687	364.364	525.01	-0.489654	0.0959683	-4.95772	7.13266e-07	1.23797e-05	Cox20	protein_coding
ENSMUSG00000039585	7021.48	6372.23	7670.72	-0.26911	0.0539661	-4.95654	7.17599e-07	1.24434e-05	Myo9a	protein_coding
ENSMUSG00000020288	1545.84	1365.94	1725.74	-0.322825	0.0637681	-4.9555	7.21462e-07	1.2492e-05	Ahsa2	protein_coding
ENSMUSG00000041460	111.401	145.517	77.2844	0.756537	0.145812	4.95543	7.2172e-07	1.2492e-05	Cacna2d4	protein_coding
ENSMUSG00000032492	291.195	237.329	345.061	-0.508549	0.102956	-4.95157	7.3616e-07	1.27302e-05	Pth1r	protein_coding
ENSMUSG00000075318	17379.4	15504.3	19254.4	-0.312793	0.0628024	-4.9513	7.37189e-07	1.27364e-05	Scn2a	protein_coding
ENSMUSG00000030894	2288.5	2512.07	2064.93	0.295608	0.060163	4.94978	7.42981e-07	1.28247e-05	Tpp1	protein_coding
ENSMUSG00000102234	101.088	145.775	56.4007	0.950388	0.174878	4.94742	7.52018e-07	1.29689e-05		antisense
ENSMUSG00000063229	9634.17	8603.57	10664.8	-0.302567	0.0603242	-4.94629	7.56431e-07	1.30331e-05	Ldha	protein_coding
ENSMUSG00000028033	5093.16	4542.42	5643.89	-0.308149	0.0615518	-4.94535	7.60084e-07	1.30841e-05	Kcnq5	protein_coding
ENSMUSG00000024459	195.323	150.744	239.901	-0.597197	0.115676	-4.94478	7.62305e-07	1.31104e-05	H2-M5	protein_coding
ENSMUSG00000024486	723.39	623.667	823.114	-0.385315	0.0766658	-4.94404	7.65189e-07	1.3148e-05	Hbegf	protein_coding
ENSMUSG00000022519	876.271	758.417	994.126	-0.38425	0.0770754	-4.94352	7.67262e-07	1.31717e-05	Srl	protein_coding
ENSMUSG00000008090	569.378	485.874	652.882	-0.410555	0.0818363	-4.94146	7.75413e-07	1.32995e-05	Fgfrl1	protein_coding
ENSMUSG00000015846	729.869	840.595	619.142	0.422651	0.0840929	4.94094	7.77456e-07	1.33225e-05	Rxra	protein_coding
ENSMUSG00000028518	2953.22	2633.49	3272.95	-0.31094	0.0623415	-4.94032	7.79944e-07	1.3353e-05	Prkaa2	protein_coding
ENSMUSG00000035828	1014.57	879.757	1149.38	-0.37717	0.075823	-4.93577	7.98334e-07	1.36555e-05	Pim3	protein_coding
ENSMUSG00000026430	864.933	742.715	987.151	-0.400864	0.0803471	-4.93327	8.08626e-07	1.3819e-05	Rassf5	protein_coding
ENSMUSG00000024691	262.233	200.633	323.833	-0.611066	0.117902	-4.93296	8.09935e-07	1.38289e-05	Fam111a	protein_coding
ENSMUSG00000045136	10888.2	7150.3	14626.1	-0.804571	0.160669	-4.93198	8.14005e-07	1.388e-05	Tubb2b	protein_coding
ENSMUSG00000050963	1263.88	1112.06	1415.7	-0.332591	0.0657221	-4.93188	8.14399e-07	1.388e-05	Kcns2	protein_coding
ENSMUSG00000025758	258.335	208.051	308.618	-0.526822	0.104119	-4.93115	8.17478e-07	1.392e-05	Plk4	protein_coding
ENSMUSG00000034007	2138.9	1836.54	2441.26	-0.395293	0.0789415	-4.92856	8.2839e-07	1.40931e-05	Scaper	protein_coding
ENSMUSG00000030093	590.483	489.982	690.984	-0.457285	0.0891773	-4.92641	8.37537e-07	1.42359e-05	Wnt7a	protein_coding
ENSMUSG00000059316	4013.58	3560.7	4466.47	-0.308965	0.0611865	-4.9251	8.43157e-07	1.43185e-05	Slc27a4	protein_coding
ENSMUSG00000031299	14231.6	12791.6	15671.6	-0.289455	0.0581676	-4.92452	8.45693e-07	1.43487e-05	Pdha1	protein_coding
ENSMUSG00000053617	2072.05	2373.85	1770.25	0.415509	0.0844351	4.91797	8.74472e-07	1.48237e-05	Sh3pxd2a	protein_coding
ENSMUSG00000024180	525.051	605.627	444.475	0.42279	0.083913	4.9176	8.76097e-07	1.48379e-05	Tmem8	protein_coding
ENSMUSG00000042523	7581.11	8333.65	6828.57	0.276054	0.0551611	4.91522	8.86818e-07	1.5006e-05	Dnal1	protein_coding
ENSMUSG00000043391	5435.19	4895.33	5975.04	-0.287529	0.0581117	-4.91361	8.94162e-07	1.51168e-05	2510009E07Rik	protein_coding
ENSMUSG00000019849	2790.05	2419.32	3160.79	-0.363383	0.071809	-4.91267	8.98457e-07	1.51487e-05	Prep	protein_coding
ENSMUSG00000024193	853.955	721.976	985.934	-0.427967	0.0858398	-4.91276	8.98045e-07	1.51487e-05	Phf1	protein_coding
ENSMUSG00000026181	2133.86	1913.41	2354.3	-0.286254	0.0570809	-4.91298	8.97042e-07	1.51487e-05	Ppm1f	protein_coding
ENSMUSG00000021130	3963.74	4602.28	3325.2	0.440355	0.087281	4.91211	9.01035e-07	1.51787e-05	Galnt16	protein_coding
ENSMUSG00000020807	2126.02	1902.93	2349.11	-0.286829	0.0569793	-4.91133	9.04602e-07	1.52252e-05	4933427D14Rik	protein_coding
ENSMUSG00000021194	5903.7	5125.6	6681.8	-0.344074	0.0668274	-4.91066	9.07726e-07	1.52642e-05	Chga	protein_coding
ENSMUSG00000111465	54.3634	79.8453	28.8816	0.962806	0.183149	4.91046	9.08638e-07	1.52659e-05
ENSMUSG00000030844	1025.51	905.083	1145.95	-0.352159	0.0728292	-4.90359	9.41004e-07	1.57957e-05	Rgs10	protein_coding
ENSMUSG00000029238	5918.86	6562.39	5275.33	0.30745	0.0618668	4.90203	9.48517e-07	1.59076e-05	Clock	protein_coding
ENSMUSG00000028613	8582.25	7701.79	9462.72	-0.294776	0.0596121	-4.90137	9.51714e-07	1.59471e-05	Lrp8	protein_coding
ENSMUSG00000030249	580.325	483.218	677.432	-0.447586	0.0870245	-4.8993	9.61803e-07	1.60957e-05	Abcc9	protein_coding
ENSMUSG00000111235	36.9533	54.4403	19.4664	0.923295	0.186132	4.8992	9.62287e-07	1.60957e-05
ENSMUSG00000030545	497.276	578.77	415.781	0.447115	0.0885733	4.89834	9.66484e-07	1.61374e-05	Pex11a	protein_coding
ENSMUSG00000072294	1391.75	1193.39	1590.11	-0.403136	0.0816473	-4.89837	9.66363e-07	1.61374e-05	Klf12	protein_coding
ENSMUSG00000021702	197.954	246.497	149.411	0.630251	0.124203	4.89796	9.68351e-07	1.61543e-05	Thbs4	protein_coding
ENSMUSG00000040009	4438.25	4002.01	4874.49	-0.284195	0.0576071	-4.89747	9.70794e-07	1.61808e-05	Gnaz	protein_coding
ENSMUSG00000018669	1498.98	1689.62	1308.35	0.355126	0.0709302	4.89608	9.77678e-07	1.62811e-05	Cdk5rap3	protein_coding
ENSMUSG00000028194	6785.14	6189.09	7381.19	-0.246503	0.049683	-4.89373	9.89417e-07	1.64621e-05	Ddah1	protein_coding
ENSMUSG00000041997	6092.69	5466.61	6718.78	-0.293518	0.059302	-4.89304	9.92897e-07	1.65055e-05	Tlk1	protein_coding
ENSMUSG00000027953	793.019	901.822	684.217	0.375675	0.0746291	4.89239	9.962e-07	1.65458e-05	Slc50a1	protein_coding
ENSMUSG00000070436	1498.97	1278.89	1719.04	-0.401917	0.0799061	-4.89105	1.00297e-06	1.66437e-05	Serpinh1	protein_coding
ENSMUSG00000038398	2020.51	2248.86	1792.16	0.329482	0.0671206	4.89041	1.00626e-06	1.66835e-05	Upf3a	protein_coding
ENSMUSG00000027405	2505.15	2263.03	2747.27	-0.266972	0.0535378	-4.88942	1.01132e-06	1.67529e-05	Nop56	protein_coding
ENSMUSG00000020096	323.569	389.298	257.839	0.552436	0.114768	4.88923	1.01229e-06	1.67542e-05	Tbata	protein_coding
ENSMUSG00000036427	12897.9	11161.7	14634.1	-0.35508	0.0694731	-4.88799	1.01872e-06	1.68459e-05	Gpi1	protein_coding
ENSMUSG00000006435	4668.98	5122.24	4215.73	0.291099	0.0598911	4.88447	1.03709e-06	1.71346e-05	Neurl1a	protein_coding
ENSMUSG00000057181	4663.59	5229.75	4097.42	0.328059	0.0650307	4.88294	1.04518e-06	1.72532e-05	5730455P16Rik	protein_coding
ENSMUSG00000030104	1452.32	1267.71	1636.93	-0.363786	0.0739917	-4.88244	1.04783e-06	1.72819e-05	Edem1	protein_coding
ENSMUSG00000024588	2546.79	2854.68	2238.91	0.333149	0.0666308	4.88154	1.0526e-06	1.73454e-05	Fech	protein_coding
ENSMUSG00000005161	7261.54	6520.05	8003.02	-0.305011	0.0628327	-4.87527	1.08659e-06	1.78899e-05	Prdx2	protein_coding
ENSMUSG00000040037	14042.6	12457.3	15627.8	-0.319812	0.0647326	-4.87457	1.09048e-06	1.79384e-05	Negr1	protein_coding
ENSMUSG00000024165	304.174	244.031	364.317	-0.533616	0.10814	-4.87388	1.09426e-06	1.79849e-05	Jpt2	protein_coding
ENSMUSG00000026000	4569.55	5058.06	4081.04	0.313193	0.0642257	4.87048	1.11328e-06	1.82816e-05	Lancl1	protein_coding
ENSMUSG00000018634	1522.71	1330.23	1715.2	-0.363693	0.074475	-4.87022	1.11475e-06	1.82898e-05	Crhr1	protein_coding
ENSMUSG00000018347	636.164	729.242	543.087	0.406031	0.081422	4.86945	1.11908e-06	1.83449e-05	Zkscan6	protein_coding
ENSMUSG00000029174	1216.2	1364.59	1067.81	0.354713	0.0728781	4.86809	1.12685e-06	1.84562e-05	Tbc1d1	protein_coding
ENSMUSG00000042734	3839.55	3443.33	4235.78	-0.304659	0.0626152	-4.86623	1.13747e-06	1.86141e-05	Ttc9	protein_coding
ENSMUSG00000003526	445.432	527.955	362.91	0.496093	0.0982659	4.86541	1.14217e-06	1.86588e-05	Prodh	protein_coding
ENSMUSG00000025964	6485.33	5641.73	7328.92	-0.357558	0.0715622	-4.86553	1.14151e-06	1.86588e-05	Adam23	protein_coding
ENSMUSG00000029313	563.2	653.606	472.794	0.453681	0.0937633	4.86329	1.15453e-06	1.88444e-05	Aff1	protein_coding
ENSMUSG00000024130	5823.83	4994.92	6652.74	-0.385966	0.0767377	-4.86262	1.1584e-06	1.88912e-05	Abca3	protein_coding
ENSMUSG00000006649	56.9498	81.6395	32.2602	0.925224	0.177839	4.86164	1.16416e-06	1.89525e-05	Nphs1	protein_coding
ENSMUSG00000032435	4184.49	3758.65	4610.33	-0.273457	0.054717	-4.86171	1.16375e-06	1.89525e-05	Dync1li1	protein_coding
ENSMUSG00000024665	5032.32	4540.23	5524.41	-0.275851	0.0559611	-4.8613	1.1662e-06	1.89693e-05	Fads2	protein_coding
ENSMUSG00000057176	248.902	299.414	198.39	0.544307	0.110351	4.85459	1.20637e-06	1.96058e-05	Ccdc189	protein_coding
ENSMUSG00000083844	1183.52	1335.3	1031.73	0.353284	0.0707718	4.85436	1.20777e-06	1.96118e-05	Ube2d-ps	transcribed_unprocessed_pseudogene
ENSMUSG00000069520	1853.61	2038.96	1668.26	0.285999	0.0583654	4.84942	1.23822e-06	2.00889e-05	Tmem19	protein_coding
ENSMUSG00000021704	3559.12	3918.84	3199.41	0.286809	0.0583357	4.84891	1.24144e-06	2.01239e-05	Mtx3	protein_coding
ENSMUSG00000036002	1489.44	1297.77	1681.1	-0.358089	0.0725014	-4.84547	1.2631e-06	2.04574e-05	Fam214b	protein_coding
ENSMUSG00000040998	5579.11	4859.07	6299.15	-0.351746	0.0705023	-4.84189	1.28611e-06	2.08122e-05	Npnt	protein_coding
ENSMUSG00000032109	280.911	350.994	210.827	0.636448	0.136159	4.83964	1.30073e-06	2.10309e-05	Nlrx1	protein_coding
ENSMUSG00000035521	2605.78	2913.62	2297.93	0.328549	0.066521	4.83881	1.30616e-06	2.11006e-05	Gnptg	protein_coding
ENSMUSG00000020268	238.746	308.194	169.298	0.729881	0.138211	4.83485	1.33244e-06	2.15068e-05	Lyrm7	protein_coding
ENSMUSG00000032586	1053.89	1202.72	905.069	0.39791	0.0812193	4.83268	1.3471e-06	2.17248e-05	Traip	protein_coding
ENSMUSG00000024325	1084.15	1277.61	890.689	0.493114	0.101562	4.83232	1.34954e-06	2.17456e-05	Ring1	protein_coding
ENSMUSG00000061911	13116.4	11731.8	14500.9	-0.299823	0.0612664	-4.83169	1.35376e-06	2.17951e-05	Myt1l	protein_coding
ENSMUSG00000112035	77.1042	102.038	52.1708	0.757885	0.159094	4.83128	1.35658e-06	2.18218e-05
ENSMUSG00000067377	1876.29	1659.19	2093.39	-0.339658	0.0706868	-4.82914	1.37121e-06	2.20385e-05	Tspan6	protein_coding
ENSMUSG00000063568	2539.42	2268.1	2810.73	-0.309419	0.063717	-4.82839	1.37643e-06	2.21036e-05	Jazf1	protein_coding
ENSMUSG00000056917	862.99	734.151	991.829	-0.413799	0.084349	-4.82805	1.37874e-06	2.21218e-05	Sipa1	protein_coding
ENSMUSG00000038836	576.971	682.561	471.381	0.492757	0.0974926	4.82769	1.38123e-06	2.21431e-05	Agbl3	protein_coding
ENSMUSG00000063160	4011.26	3459	4563.53	-0.369561	0.0736837	-4.8265	1.38952e-06	2.22571e-05	Numbl	protein_coding
ENSMUSG00000030500	1935.3	1522.49	2348.1	-0.563131	0.113352	-4.82422	1.40552e-06	2.24943e-05	Slc17a6	protein_coding
ENSMUSG00000015749	4970.72	4480.57	5460.86	-0.273491	0.0556312	-4.82366	1.40949e-06	2.25197e-05	Anp32e	protein_coding
ENSMUSG00000043872	521.291	435.06	607.522	-0.456581	0.0933839	-4.82382	1.40833e-06	2.25197e-05	Zmym1	protein_coding
ENSMUSG00000008167	1496.6	1296.8	1696.39	-0.372906	0.076114	-4.8224	1.41845e-06	2.26436e-05	Fbxw9	protein_coding
ENSMUSG00000004113	7269.93	6215.23	8324.63	-0.396622	0.0799139	-4.82161	1.42404e-06	2.27138e-05	Cacna1b	protein_coding
ENSMUSG00000027326	105.81	73.9837	137.635	-0.726477	0.15024	-4.82121	1.42688e-06	2.27398e-05	Knl1	protein_coding
ENSMUSG00000048004	973.046	770.071	1176.02	-0.55763	0.113353	-4.81816	1.44891e-06	2.30715e-05	Tmem196	protein_coding
ENSMUSG00000068748	24991.1	21363.8	28618.5	-0.401708	0.0815964	-4.81759	1.45305e-06	2.3118e-05	Ptprz1	protein_coding
ENSMUSG00000037519	1946.33	2155.56	1737.1	0.297504	0.0604513	4.81137	1.49897e-06	2.38285e-05	Ppfia1	protein_coding
ENSMUSG00000033191	658.204	552.138	764.27	-0.427456	0.0845162	-4.80928	1.51475e-06	2.40591e-05	Tie1	protein_coding
ENSMUSG00000072964	3713.69	3342.52	4084.86	-0.277613	0.0566413	-4.80895	1.51726e-06	2.40787e-05	Bhlhb9	protein_coding
ENSMUSG00000021610	4519.35	4951.97	4086.74	0.269025	0.0551339	4.80653	1.5357e-06	2.43509e-05	Clptm1l	protein_coding
ENSMUSG00000039611	2465.97	2176.89	2755.04	-0.332188	0.0682425	-4.80561	1.54279e-06	2.44429e-05	Tmem246	protein_coding
ENSMUSG00000027879	2492.32	2755.13	2229.51	0.295723	0.0604846	4.8042	1.55371e-06	2.45952e-05	Sec22b	protein_coding
ENSMUSG00000030979	1097.42	1235.01	959.822	0.353182	0.0724329	4.80359	1.55845e-06	2.46496e-05	Uros	protein_coding
ENSMUSG00000059772	597.915	510.313	685.516	-0.402839	0.0817987	-4.80335	1.56032e-06	2.46585e-05	Slx1b	protein_coding
ENSMUSG00000037872	1917.92	1658.93	2176.9	-0.354453	0.0703623	-4.80128	1.57653e-06	2.48939e-05	Ackr1	protein_coding
ENSMUSG00000014813	332.365	265.404	399.327	-0.538859	0.109818	-4.79747	1.60686e-06	2.53516e-05	Stc1	protein_coding
ENSMUSG00000031827	2091.89	1847.31	2336.48	-0.336153	0.0697473	-4.79613	1.6176e-06	2.54998e-05	Cotl1	protein_coding
ENSMUSG00000018287	1592.15	1764.34	1419.97	0.299715	0.0611034	4.79547	1.62294e-06	2.55626e-05	Spag7	protein_coding
ENSMUSG00000046034	744.065	845.253	642.877	0.378591	0.0774092	4.79516	1.62542e-06	2.55803e-05	Otulin	protein_coding
ENSMUSG00000046822	3557.98	3950.64	3165.33	0.318751	0.0661392	4.79411	1.63397e-06	2.56935e-05	Slc39a3	protein_coding
ENSMUSG00000055629	3575.32	3163.38	3987.26	-0.324632	0.0667944	-4.79012	1.66683e-06	2.61885e-05	B4galnt4	protein_coding
ENSMUSG00000115099	355.858	443.35	268.366	0.628008	0.126739	4.7895	1.672e-06	2.62479e-05
ENSMUSG00000107318	82.8113	112.374	53.2482	0.840386	0.161139	4.78861	1.6794e-06	2.63422e-05	Gm30003
ENSMUSG00000030862	277.088	331.474	222.702	0.524506	0.106463	4.78747	1.68895e-06	2.64701e-05	Cpxm2	protein_coding
ENSMUSG00000090053	509.253	421.827	596.679	-0.472174	0.0976473	-4.78709	1.69216e-06	2.64983e-05	Palm2	protein_coding
ENSMUSG00000015016	660.923	771.132	550.713	0.446349	0.0890681	4.78419	1.71676e-06	2.68391e-05	Acsf3	protein_coding
ENSMUSG00000056413	10379.6	9213.77	11545.5	-0.333943	0.0703921	-4.78426	1.7162e-06	2.68391e-05	Adap1	protein_coding
ENSMUSG00000036860	533.798	624.699	442.896	0.454651	0.0898076	4.78363	1.7216e-06	2.68925e-05	Mrpl55	protein_coding
ENSMUSG00000020484	3184.69	2784.89	3584.49	-0.358183	0.0742975	-4.78247	1.73158e-06	2.70261e-05	Xbp1	protein_coding
ENSMUSG00000018899	191.426	234.91	147.942	0.593336	0.124367	4.78053	1.74834e-06	2.72632e-05	Irf1	protein_coding
ENSMUSG00000049932	1058.3	931.015	1185.58	-0.342162	0.0707521	-4.78038	1.74965e-06	2.72632e-05	H2afx	protein_coding
ENSMUSG00000052928	2894.95	2548.45	3241.44	-0.341042	0.0706941	-4.77817	1.76895e-06	2.75412e-05	Ctif	protein_coding
ENSMUSG00000030123	5872.54	5004.01	6741.07	-0.396807	0.0798663	-4.77335	1.81187e-06	2.81833e-05	Plxnd1	protein_coding
ENSMUSG00000032850	6252.66	6928.49	5576.83	0.303446	0.0625354	4.77314	1.8138e-06	2.81833e-05	Rnft2	protein_coding
ENSMUSG00000105230	211.08	166.39	255.77	-0.559452	0.114039	-4.77304	1.81467e-06	2.81833e-05
ENSMUSG00000021275	4033	4450.22	3615.78	0.305477	0.0640979	4.77269	1.81782e-06	2.8209e-05	Tecpr2	protein_coding
ENSMUSG00000051359	21602.8	19570.7	23634.9	-0.275087	0.0573989	-4.77247	1.81979e-06	2.82164e-05	Ncald	protein_coding
ENSMUSG00000040972	3273.77	2872.27	3675.27	-0.35296	0.0737207	-4.76881	1.85316e-06	2.87103e-05	Igsf21	protein_coding
ENSMUSG00000026950	446.322	528.568	364.076	0.49159	0.0979313	4.76563	1.88265e-06	2.91433e-05	Neb	protein_coding
ENSMUSG00000028047	1073.08	922.64	1223.52	-0.385962	0.0791407	-4.76459	1.89242e-06	2.92705e-05	Thbs3	protein_coding
ENSMUSG00000001786	948.592	1062.88	834.3	0.338718	0.0699272	4.7638	1.89977e-06	2.93603e-05	Fbxo7	protein_coding
ENSMUSG00000019942	200.809	147.809	253.809	-0.664115	0.136132	-4.76263	1.91089e-06	2.9508e-05	Cdk1	protein_coding
ENSMUSG00000063646	3694.35	3359.05	4029.64	-0.254607	0.0526723	-4.76166	1.92007e-06	2.96255e-05	Jakmip1	protein_coding
ENSMUSG00000061455	1948.61	2156.35	1740.87	0.297265	0.0611875	4.7607	1.92924e-06	2.97426e-05	Stx17	protein_coding
ENSMUSG00000027993	10388.7	9416.02	11361.3	-0.262713	0.0543718	-4.75986	1.9373e-06	2.98426e-05	Trim2	protein_coding
ENSMUSG00000021287	148.15	187.31	108.989	0.66714	0.133736	4.75903	1.94523e-06	2.99405e-05	Xrcc3	protein_coding
ENSMUSG00000053004	424.09	342.847	505.334	-0.510287	0.102295	-4.75745	1.9605e-06	3.01508e-05	Hrh1	protein_coding
ENSMUSG00000051497	960.79	814.964	1106.62	-0.427578	0.0900125	-4.75601	1.97457e-06	3.03426e-05	Kcnj16	protein_coding
ENSMUSG00000103651	521.787	593.967	449.608	0.403213	0.0865297	4.75369	1.99735e-06	3.06677e-05		TEC
ENSMUSG00000116243	14.4657	25.1658	3.7656	0.951916	0.189023	4.74999	2.03431e-06	3.12098e-05
ENSMUSG00000109408	165.517	206.674	124.36	0.632341	0.129483	4.74959	2.03828e-06	3.12454e-05	A930037H05Rik
ENSMUSG00000037010	1135.61	915.108	1356.12	-0.516861	0.104645	-4.74834	2.05098e-06	3.14145e-05	Apln	protein_coding
ENSMUSG00000036989	4698.99	4160.22	5237.76	-0.316819	0.0652313	-4.74791	2.05533e-06	3.14557e-05	Trim3	protein_coding
ENSMUSG00000032803	1508.86	1330.78	1686.94	-0.323424	0.0663833	-4.74697	2.06488e-06	3.15763e-05	Cdv3	protein_coding
ENSMUSG00000048696	850.347	702.828	997.865	-0.47464	0.0991233	-4.74674	2.06718e-06	3.1586e-05	Mex3d	protein_coding
ENSMUSG00000020515	2056.65	2287.9	1825.39	0.309687	0.0636288	4.74358	2.09978e-06	3.20581e-05	Cnot8	protein_coding
ENSMUSG00000036887	904.968	792.805	1017.13	-0.353273	0.0737021	-4.74193	2.11691e-06	3.22936e-05	C1qa	protein_coding
ENSMUSG00000048076	8768.69	9577.07	7960.31	0.250574	0.0517034	4.73937	2.14382e-06	3.26778e-05	Arf1	protein_coding
ENSMUSG00000025212	4585.32	4119.79	5050.84	-0.285158	0.0592077	-4.73805	2.15783e-06	3.28648e-05	Sfxn3	protein_coding
ENSMUSG00000043410	308.967	367.239	250.695	0.507508	0.10291	4.73754	2.16328e-06	3.29212e-05	Hfm1	protein_coding
ENSMUSG00000049775	24857.7	21395.2	28320.2	-0.395512	0.0831041	-4.73556	2.18452e-06	3.32177e-05	Tmsb4x	protein_coding
ENSMUSG00000026414	76.1682	105.039	47.2976	0.829752	0.172126	4.73505	2.18996e-06	3.32737e-05	Tnnt2	protein_coding
ENSMUSG00000020778	683.144	790.183	576.105	0.420322	0.0846977	4.73489	2.19172e-06	3.32737e-05	Ten1	protein_coding
ENSMUSG00000066979	2173.02	2406.43	1939.61	0.297126	0.0614423	4.73455	2.19539e-06	3.33026e-05	Bub3	protein_coding
ENSMUSG00000111000	34.1066	51.6541	16.559	0.956238	0.189446	4.73243	2.21847e-06	3.36258e-05
ENSMUSG00000031765	1821.6	2117.48	1525.72	0.428315	0.0859116	4.72919	2.25419e-06	3.41397e-05	Mt1	protein_coding
ENSMUSG00000102018	93.0237	121.465	64.5826	0.741869	0.152153	4.72847	2.26214e-06	3.42328e-05	K230010J24Rik	protein_coding
ENSMUSG00000024521	126.684	168.613	84.7553	0.782871	0.15342	4.72826	2.26448e-06	3.42407e-05	Pmaip1	protein_coding
ENSMUSG00000079084	740.975	636.504	845.447	-0.394059	0.0823958	-4.72784	2.26917e-06	3.42842e-05	Ccdc82	protein_coding
ENSMUSG00000031295	1686.57	1888.69	1484.45	0.326026	0.0669305	4.72626	2.28694e-06	3.45251e-05	Phka2	protein_coding
ENSMUSG00000050796	559.901	644.508	475.295	0.425661	0.0900021	4.72471	2.30439e-06	3.47607e-05	B3galt6	protein_coding
ENSMUSG00000034205	138.663	102.937	174.388	-0.649561	0.133672	-4.72409	2.31145e-06	3.48395e-05	Loxl2	protein_coding
ENSMUSG00000032405	2400.21	2635.89	2164.54	0.282999	0.0594599	4.72275	2.32678e-06	3.50425e-05	Pias1	protein_coding
ENSMUSG00000033039	2613.77	2326.35	2901.19	-0.308902	0.0643853	-4.72146	2.34163e-06	3.52382e-05	Micall1	protein_coding
ENSMUSG00000038886	8722.48	9414.33	8030.63	0.22857	0.0480459	4.71958	2.36328e-06	3.55357e-05	Man2a2	protein_coding
ENSMUSG00000003847	5484.9	6036.35	4933.44	0.299873	0.0638654	4.71796	2.38227e-06	3.57927e-05	Nfat5	protein_coding
ENSMUSG00000020135	7851.65	6802.08	8901.21	-0.371521	0.0772727	-4.71584	2.40712e-06	3.61374e-05	Apc2	protein_coding
ENSMUSG00000097595	67.5327	91.5647	43.5007	0.818476	0.16286	4.71548	2.41145e-06	3.61737e-05		lincRNA
ENSMUSG00000029484	472.169	374.157	570.181	-0.559484	0.121898	-4.71484	2.41905e-06	3.6249e-05	Anxa3	protein_coding
ENSMUSG00000032564	3262.64	2817.15	3708.14	-0.356793	0.0718926	-4.71473	2.42031e-06	3.6249e-05	Cpne4	protein_coding
ENSMUSG00000030270	571.166	438.601	703.73	-0.601179	0.121575	-4.71451	2.4229e-06	3.6259e-05	Cpne9	protein_coding
ENSMUSG00000059974	18249.3	16665.8	19832.7	-0.257856	0.0546989	-4.71058	2.47015e-06	3.69369e-05	Ntm	protein_coding
ENSMUSG00000020056	570.878	661.273	480.482	0.426593	0.087105	4.70844	2.49623e-06	3.72975e-05	Washc3	protein_coding
ENSMUSG00000019944	535.304	447.727	622.881	-0.447636	0.0935308	-4.70693	2.51475e-06	3.75445e-05	Rhobtb1	protein_coding
ENSMUSG00000108778	50.6478	71.4443	29.8514	0.869931	0.177202	4.70578	2.52899e-06	3.77273e-05
ENSMUSG00000061461	589.594	689.477	489.71	0.458785	0.0949112	4.70446	2.54537e-06	3.79417e-05	Smim20	protein_coding
ENSMUSG00000004530	4345.38	3816.53	4874.24	-0.342969	0.071918	-4.70284	2.56568e-06	3.82143e-05	Coro1c	protein_coding
ENSMUSG00000085148	735.833	625.172	846.494	-0.415949	0.0868555	-4.70251	2.56977e-06	3.82451e-05	Mir22hg	processed_transcript
ENSMUSG00000001403	106.809	76.1433	137.475	-0.704953	0.145931	-4.70184	2.57821e-06	3.83172e-05	Ube2c	protein_coding
ENSMUSG00000032126	606.633	697.965	515.3	0.412214	0.0852428	4.70178	2.57906e-06	3.83172e-05	Hmbs	protein_coding
ENSMUSG00000041609	2365.78	2098.1	2633.46	-0.323688	0.0683283	-4.70165	2.5807e-06	3.83172e-05	Bicdl1	protein_coding
ENSMUSG00000047945	13243.5	11388.2	15098.7	-0.390587	0.0817958	-4.70115	2.58697e-06	3.83802e-05	Marcksl1	protein_coding
ENSMUSG00000003872	1385.65	1175.93	1595.37	-0.419174	0.0875876	-4.70032	2.59749e-06	3.85061e-05	Lin7b	protein_coding
ENSMUSG00000004865	4939.12	4502.25	5375.99	-0.246889	0.0517266	-4.69709	2.63898e-06	3.90903e-05	Srpk1	protein_coding
ENSMUSG00000032018	3608	3181.42	4034.57	-0.32423	0.067177	-4.69668	2.64424e-06	3.91247e-05	Sc5d	protein_coding
ENSMUSG00000039714	896.81	750.765	1042.85	-0.457888	0.0979701	-4.69659	2.64543e-06	3.91247e-05	Cplx3	protein_coding
ENSMUSG00000013150	913.049	800.035	1026.06	-0.355217	0.0755661	-4.69593	2.65398e-06	3.92204e-05	Gfod2	protein_coding
ENSMUSG00000030707	2645.56	2327.12	2964	-0.337964	0.0708794	-4.69299	2.69242e-06	3.97298e-05	Coro1a	protein_coding
ENSMUSG00000031343	5842.88	5250.39	6435.38	-0.298069	0.063482	-4.69297	2.69266e-06	3.97298e-05	Gabra3	protein_coding
ENSMUSG00000106383	286.932	340.495	233.368	0.50289	0.104026	4.69148	2.71231e-06	3.99886e-05
ENSMUSG00000033669	357.476	289.457	425.495	-0.511081	0.106092	-4.69099	2.71891e-06	4.00547e-05	Zfp7	protein_coding
ENSMUSG00000025782	691.415	786.303	596.527	0.383147	0.0803426	4.69062	2.72384e-06	4.00619e-05	Taf3	protein_coding
ENSMUSG00000026970	1344.47	1184.27	1504.68	-0.326233	0.0675633	-4.69051	2.72529e-06	4.00619e-05	Rbms1	protein_coding
ENSMUSG00000079339	157.478	118.984	195.973	-0.625421	0.130711	-4.69047	2.72576e-06	4.00619e-05	Ifit1bl1	protein_coding
ENSMUSG00000050541	434.616	359.833	509.399	-0.47307	0.0994178	-4.69022	2.72905e-06	4.00791e-05	Adra1b	protein_coding
ENSMUSG00000038900	243.59	192.746	294.433	-0.555186	0.116789	-4.68976	2.73532e-06	4.014e-05	Rpl12	protein_coding
ENSMUSG00000030611	836.201	943.871	728.531	0.356255	0.074082	4.68635	2.78116e-06	4.0781e-05	Mrps11	protein_coding
ENSMUSG00000001986	6735.42	5962.49	7508.35	-0.311741	0.0645776	-4.6861	2.78462e-06	4.08e-05	Gria3	protein_coding
ENSMUSG00000050164	513.138	416.706	609.57	-0.499729	0.101141	-4.68465	2.80443e-06	4.10586e-05	Mchr1	protein_coding
ENSMUSG00000015214	2591.34	2838.27	2344.4	0.26592	0.0557933	4.6808	2.85759e-06	4.1772e-05	Mtmr1	protein_coding
ENSMUSG00000023800	3013.14	2624.77	3401.51	-0.356301	0.074214	-4.68085	2.85686e-06	4.1772e-05	Tiam2	protein_coding
ENSMUSG00000033788	234.356	185.096	283.616	-0.556059	0.118709	-4.68009	2.8675e-06	4.18846e-05	Dysf	protein_coding
ENSMUSG00000036295	3943.85	3577.56	4310.15	-0.269881	0.0573808	-4.67892	2.88386e-06	4.20909e-05	Lrrn3	protein_coding
ENSMUSG00000025579	5608.4	6596.12	4620.69	0.490091	0.107502	4.67835	2.89193e-06	4.21762e-05	Gaa	protein_coding
ENSMUSG00000016150	4192.65	3639.68	4745.63	-0.376811	0.0803374	-4.67737	2.90576e-06	4.23111e-05	Tenm1	protein_coding
ENSMUSG00000028617	927.464	820.005	1034.92	-0.334966	0.0713445	-4.67722	2.90789e-06	4.23111e-05	Lrrc42	protein_coding
ENSMUSG00000057778	372.873	441.818	303.928	0.492611	0.100708	4.67727	2.90716e-06	4.23111e-05	Cyb5d2	protein_coding
ENSMUSG00000020251	193.215	244.383	142.048	0.662644	0.138659	4.67635	2.92033e-06	4.24593e-05	Glt8d2	protein_coding
ENSMUSG00000073607	53.7461	33.517	73.9752	-0.788595	0.177391	-4.67417	2.9515e-06	4.28796e-05	Gm10548	transcribed_processed_pseudogene
ENSMUSG00000001844	1019.5	1139.65	899.341	0.329711	0.0692232	4.6736	2.95963e-06	4.29647e-05	Zdhhc4	protein_coding
ENSMUSG00000029634	2252.58	2529.08	1976.08	0.348924	0.0741238	4.67128	2.99334e-06	4.34206e-05	Rnf6	protein_coding
ENSMUSG00000026437	620.594	506.202	734.985	-0.491679	0.101249	-4.67082	3.00004e-06	4.34845e-05	Cdk18	protein_coding
ENSMUSG00000034994	38935.6	35781.5	42089.7	-0.238228	0.0508476	-4.66908	3.0255e-06	4.38199e-05	Eef2	protein_coding
ENSMUSG00000036959	1064.62	889.7	1239.54	-0.434766	0.0882934	-4.66686	3.05831e-06	4.42612e-05	Bcorl1	protein_coding
ENSMUSG00000022061	204.221	249.88	158.562	0.57679	0.117452	4.66578	3.07455e-06	4.44622e-05	Nkx3-1	protein_coding
ENSMUSG00000035936	6382.9	6927.65	5838.15	0.242631	0.0514476	4.66483	3.08873e-06	4.46332e-05	Aldh5a1	protein_coding
ENSMUSG00000026605	385.369	320.237	450.501	-0.463637	0.0988394	-4.6635	3.10875e-06	4.48881e-05	Cenpf	protein_coding
ENSMUSG00000031822	2059.43	2357.87	1760.99	0.424928	0.0954203	4.66282	3.11909e-06	4.5003e-05	Gse1	protein_coding
ENSMUSG00000025702	3467.25	3103.89	3830.62	-0.306949	0.0658039	-4.66216	3.12909e-06	4.51128e-05	March8	protein_coding
ENSMUSG00000022433	5091.69	4620.48	5562.91	-0.263267	0.0558696	-4.65909	3.17609e-06	4.57555e-05	Csnk1e	protein_coding
ENSMUSG00000039463	1433.01	1619.84	1246.18	0.363428	0.0764993	4.65877	3.18104e-06	4.57919e-05	Slc9a8	protein_coding
ENSMUSG00000026820	1224.15	1083.17	1365.13	-0.33483	0.0719564	-4.6573	3.20379e-06	4.60843e-05	Ptges2	protein_coding
ENSMUSG00000051817	1990.08	1702.45	2277.71	-0.40063	0.084634	-4.6563	3.21937e-06	4.62732e-05	Sox12	protein_coding
ENSMUSG00000070282	168.531	209.608	127.454	0.630657	0.133521	4.65389	3.25737e-06	4.67838e-05		transcribed_processed_pseudogene
ENSMUSG00000029419	6394.54	7069.56	5719.52	0.297323	0.0629789	4.65271	3.27606e-06	4.70165e-05	Gm996	protein_coding
ENSMUSG00000018750	3736.84	3378.07	4095.62	-0.262926	0.0553127	-4.65031	3.31432e-06	4.75296e-05	Zbtb4	protein_coding
ENSMUSG00000000441	4920.73	4509.8	5331.66	-0.238112	0.0506803	-4.64921	3.33204e-06	4.77113e-05	Raf1	protein_coding
ENSMUSG00000071691	197.402	237.753	157.051	0.544372	0.115315	4.64934	3.33e-06	4.77113e-05	Gm960	protein_coding
ENSMUSG00000070462	670.843	555.523	786.162	-0.466468	0.0978184	-4.64781	3.35481e-06	4.80009e-05	Tlnrd1	protein_coding
ENSMUSG00000034613	4025.11	3591.48	4458.73	-0.299199	0.0630556	-4.6472	3.36467e-06	4.81056e-05	Ppm1h	protein_coding
ENSMUSG00000005357	266.088	202.366	329.81	-0.606191	0.121029	-4.64684	3.3706e-06	4.8154e-05	Slc1a6	protein_coding
ENSMUSG00000026158	4924.65	5495.6	4353.7	0.33363	0.0714789	4.646	3.38425e-06	4.83125e-05	Ogfrl1	protein_coding
ENSMUSG00000021993	1334.58	1511.62	1157.55	0.356202	0.073759	4.64555	3.39168e-06	4.8382e-05	Mipep	protein_coding
ENSMUSG00000019876	238.268	287.581	188.955	0.553831	0.12027	4.64261	3.44034e-06	4.90391e-05	Pkib	protein_coding
ENSMUSG00000022711	1271.33	1411.99	1130.67	0.302693	0.0633264	4.64239	3.44409e-06	4.90556e-05	Pmm2	protein_coding
ENSMUSG00000027371	751.713	857.652	645.774	0.378832	0.0779847	4.64193	3.45162e-06	4.91258e-05	Fahd2a	protein_coding
ENSMUSG00000058192	1851.47	1671.24	2031.69	-0.282767	0.0605412	-4.64141	3.46044e-06	4.92142e-05	Zfp846	protein_coding
ENSMUSG00000041920	867.138	735.872	998.405	-0.419171	0.0883848	-4.64029	3.47917e-06	4.94435e-05	Slc16a6	protein_coding
ENSMUSG00000049327	1274.01	1124	1424.02	-0.320542	0.0669629	-4.63922	3.4973e-06	4.96637e-05	Kmt5a	protein_coding
ENSMUSG00000028049	1533.68	1372.09	1695.27	-0.301356	0.0643674	-4.63705	3.53409e-06	5.01109e-05	Scamp3	protein_coding
ENSMUSG00000032254	178.338	136.861	219.816	-0.602388	0.127615	-4.63718	3.532e-06	5.01109e-05	Kif23	protein_coding
ENSMUSG00000069835	621.126	718.343	523.91	0.432086	0.0915238	4.63612	3.55016e-06	5.0301e-05	Sat2	protein_coding
ENSMUSG00000024500	7728.66	6966.81	8490.51	-0.288382	0.0620817	-4.63412	3.58455e-06	5.07503e-05	Ppp2r2b	protein_coding
ENSMUSG00000002102	4814.27	4332.82	5295.71	-0.288538	0.061806	-4.63367	3.59248e-06	5.08245e-05	Psmc3	protein_coding
ENSMUSG00000027469	346.773	282.427	411.12	-0.492295	0.10183	-4.63273	3.60875e-06	5.10165e-05	Tpx2	protein_coding
ENSMUSG00000049420	1167.81	1031.1	1304.51	-0.334302	0.071634	-4.63221	3.61781e-06	5.11063e-05	Tmem200a	protein_coding
ENSMUSG00000039018	827.185	939.622	714.748	0.366659	0.0761262	4.63202	3.6211e-06	5.11145e-05	Mtg1	protein_coding
ENSMUSG00000020086	1725.98	1508.69	1943.27	-0.355849	0.0760925	-4.6315	3.63032e-06	5.12065e-05	H2afy2	protein_coding
ENSMUSG00000021047	3557.8	3889.01	3226.6	0.264296	0.0564045	4.62798	3.69243e-06	5.20049e-05	Nova1	protein_coding
ENSMUSG00000053134	624.012	730.958	517.066	0.466791	0.0993937	4.62808	3.69078e-06	5.20049e-05	Supt7l	protein_coding
ENSMUSG00000002808	1521.18	1327.22	1715.13	-0.364484	0.0783563	-4.62747	3.70152e-06	5.20942e-05	Epdr1	protein_coding
ENSMUSG00000020893	2224.97	2481.77	1968.16	0.335129	0.0725956	4.62634	3.72176e-06	5.23401e-05	Per1	protein_coding
ENSMUSG00000097277	424.731	495.471	353.991	0.446145	0.0918636	4.62333	3.77635e-06	5.30683e-05	2900076A07Rik	lincRNA
ENSMUSG00000005871	63528.7	56290.8	70766.7	-0.338303	0.0739035	-4.62276	3.78668e-06	5.31739e-05	Apc	protein_coding
ENSMUSG00000038658	3361.56	3670.23	3052.88	0.259738	0.0554527	4.6221	3.79877e-06	5.3304e-05	Ric1	protein_coding
ENSMUSG00000011306	2310.83	2526.34	2095.33	0.27615	0.0597708	4.62155	3.80886e-06	5.33345e-05	Sugp1	protein_coding
ENSMUSG00000027858	3099.73	2543.92	3655.53	-0.487704	0.104033	-4.62152	3.80941e-06	5.33345e-05	Tspan2	protein_coding
ENSMUSG00000028278	5918.67	5327.18	6510.16	-0.285027	0.0609817	-4.6217	3.80607e-06	5.33345e-05	Rragd	protein_coding
ENSMUSG00000026843	2202.02	2418.74	1985.3	0.280157	0.0598454	4.62054	3.82746e-06	5.35476e-05	Fubp3	protein_coding
ENSMUSG00000029314	95.1622	68.1799	122.144	-0.694089	0.14812	-4.61979	3.84128e-06	5.37012e-05	Gpat3	protein_coding
ENSMUSG00000037447	447.017	516.895	377.138	0.424133	0.0891648	4.61674	3.89818e-06	5.44162e-05	Arid5a	protein_coding
ENSMUSG00000041769	2953.84	2642.2	3265.48	-0.30169	0.0646555	-4.61685	3.89614e-06	5.44162e-05	Ppp2r2d	protein_coding
ENSMUSG00000034636	15358.4	14135	16581.8	-0.237468	0.0514194	-4.61485	3.93385e-06	5.48736e-05	Zyg11b	protein_coding
ENSMUSG00000026280	2711.31	2962.54	2460.08	0.264563	0.0566445	4.6146	3.93849e-06	5.48978e-05	Atg4b	protein_coding
ENSMUSG00000036353	2798.88	2282.2	3315.55	-0.502475	0.1086	-4.6137	3.95557e-06	5.50952e-05	P2ry12	protein_coding
ENSMUSG00000020912	288.116	448.889	127.344	0.902953	0.193165	4.61239	3.9807e-06	5.54044e-05	Krt12	protein_coding
ENSMUSG00000050312	669.379	782.316	556.442	0.454353	0.0944503	4.61166	3.99468e-06	5.5558e-05	Nsun3	protein_coding
ENSMUSG00000039201	467.178	386	548.355	-0.470963	0.0995401	-4.61029	4.02116e-06	5.58852e-05	Tbc1d25	protein_coding
ENSMUSG00000027465	2880.85	3136.95	2624.75	0.253057	0.0542913	4.60759	4.07355e-06	5.65718e-05	Tbc1d20	protein_coding
ENSMUSG00000008604	3329.93	2954.3	3705.55	-0.306302	0.0646196	-4.60302	4.16417e-06	5.77878e-05	Ubqln4	protein_coding
ENSMUSG00000004221	2001.34	2197.43	1805.25	0.282995	0.0610224	4.60064	4.21203e-06	5.83662e-05	Ikbkg	protein_coding
ENSMUSG00000040016	464.157	369.826	558.488	-0.539847	0.116573	-4.60071	4.21055e-06	5.83662e-05	Ptger3	protein_coding
ENSMUSG00000056612	250.68	201.342	300.018	-0.523734	0.112773	-4.59833	4.25886e-06	5.8972e-05	Ppp1r14b	protein_coding
ENSMUSG00000059743	223.319	173.9	272.738	-0.573729	0.124897	-4.59809	4.2639e-06	5.89985e-05	Fdps	protein_coding
ENSMUSG00000043300	2133.38	1909.02	2357.74	-0.305829	0.0663195	-4.59398	4.34873e-06	6.01282e-05	B3galnt1	protein_coding
ENSMUSG00000007682	6714.97	5659.92	7770.01	-0.439	0.0954043	-4.59243	4.38114e-06	6.05321e-05	Dio2	protein_coding
ENSMUSG00000023755	276.512	226.095	326.93	-0.493756	0.107857	-4.59201	4.38988e-06	6.06085e-05	Rhebl1	protein_coding
ENSMUSG00000039233	2723.53	3064.7	2382.37	0.367107	0.0809504	4.59104	4.41044e-06	6.08036e-05	Tbce	protein_coding
ENSMUSG00000100954	80.1883	55.4893	104.887	-0.712125	0.161338	-4.59107	4.40978e-06	6.08036e-05		antisense
ENSMUSG00000020150	251.561	198.052	305.07	-0.56364	0.120776	-4.59026	4.42701e-06	6.09876e-05	Gamt	protein_coding
ENSMUSG00000034432	3059.99	3343.98	2776	0.264065	0.0568484	4.58789	4.47749e-06	6.1638e-05	Cops8	protein_coding
ENSMUSG00000007739	3806.54	3467.71	4145.36	-0.260087	0.0564735	-4.5854	4.53113e-06	6.2331e-05	Cct4	protein_coding
ENSMUSG00000039361	9298.16	8503.75	10092.6	-0.248067	0.0537754	-4.58373	4.56746e-06	6.27852e-05	Picalm	protein_coding
ENSMUSG00000028284	4156.89	4576.62	3737.15	0.279752	0.0597805	4.5833	4.57691e-06	6.28693e-05	Map3k7	protein_coding
ENSMUSG00000036833	375.995	437.933	314.058	0.445073	0.0928364	4.5804	4.64077e-06	6.37002e-05	Pnpla7	protein_coding
ENSMUSG00000002017	2038.5	1801.93	2275.07	-0.318873	0.0678539	-4.57954	4.65994e-06	6.38243e-05	Fam98a	protein_coding
ENSMUSG00000025986	7040.48	6408.87	7672.09	-0.26716	0.0583908	-4.57965	4.65747e-06	6.38243e-05	Slc39a10	protein_coding
ENSMUSG00000030337	2223.5	2510.99	1936.01	0.367756	0.0800573	4.57972	4.65592e-06	6.38243e-05	Vamp1	protein_coding
ENSMUSG00000003500	3675.96	3234.74	4117.18	-0.332518	0.0710806	-4.57876	4.67741e-06	6.40172e-05	Impdh1	protein_coding
ENSMUSG00000022940	706.361	806.08	606.642	0.388295	0.0826562	4.57546	4.75173e-06	6.49872e-05	Pigp	protein_coding
ENSMUSG00000021665	3265.4	2866.57	3664.23	-0.35336	0.0773436	-4.57473	4.76838e-06	6.51534e-05	Hexb	protein_coding
ENSMUSG00000090564	58.3716	36.5669	80.1763	-0.793298	0.175653	-4.57462	4.77077e-06	6.51534e-05	A430057M04Rik	processed_transcript
ENSMUSG00000030649	850.199	964.437	735.961	0.368564	0.0782268	4.57394	4.78641e-06	6.53198e-05	Anapc15	protein_coding
ENSMUSG00000026663	2451.9	2763.32	2140.47	0.352966	0.0757432	4.57258	4.81744e-06	6.56958e-05	Atf6	protein_coding
ENSMUSG00000085438	32942.4	29146.9	36737.9	-0.33546	0.0734315	-4.57175	4.83659e-06	6.59095e-05	1700020I14Rik	lincRNA
ENSMUSG00000039133	68.2362	95.2646	41.2078	0.861582	0.173132	4.57101	4.85379e-06	6.60962e-05		protein_coding
ENSMUSG00000025959	5020.84	4422.64	5619.04	-0.335148	0.0722882	-4.56735	4.93934e-06	6.72127e-05	Klf7	protein_coding
ENSMUSG00000109398	441.581	510.484	372.678	0.428016	0.0920888	4.56652	4.95896e-06	6.74311e-05
ENSMUSG00000040570	2397.62	2127.09	2668.15	-0.320188	0.0692905	-4.5659	4.97355e-06	6.7581e-05	Rundc3b	protein_coding
ENSMUSG00000024592	588.397	696.112	480.683	0.483281	0.10046	4.56343	5.03239e-06	6.83313e-05	C330018D20Rik	protein_coding
ENSMUSG00000049288	1431.83	1246.36	1617.3	-0.348565	0.0736975	-4.56295	5.04406e-06	6.84406e-05	Lix1l	protein_coding
ENSMUSG00000104148	199.552	158.179	240.925	-0.548755	0.124324	-4.56262	5.052e-06	6.84992e-05	Pcdha2	protein_coding
ENSMUSG00000031278	5584.33	5013.29	6155.37	-0.294286	0.0639964	-4.56196	5.06784e-06	6.86647e-05	Acsl4	protein_coding
ENSMUSG00000097697	32.1376	15.8338	48.4414	-0.918461	0.19033	-4.56127	5.08461e-06	6.88426e-05	4833412C05Rik	lincRNA
ENSMUSG00000022353	3765.44	3131.54	4399.34	-0.454887	0.0969672	-4.56079	5.09611e-06	6.89488e-05	Mtss1	protein_coding
ENSMUSG00000035355	498.828	401.81	595.846	-0.515371	0.108355	-4.55989	5.11799e-06	6.91954e-05	Kcnh4	protein_coding
ENSMUSG00000021250	726.036	871.97	580.101	0.538911	0.122013	4.55771	5.1714e-06	6.98675e-05	Fos	protein_coding
ENSMUSG00000059921	2002.88	1745.97	2259.79	-0.351374	0.0750067	-4.55622	5.20819e-06	7.03143e-05	Unc5c	protein_coding
ENSMUSG00000001518	584.924	673.664	496.184	0.413082	0.0878381	4.55472	5.24545e-06	7.07668e-05	Itfg2	protein_coding
ENSMUSG00000045969	1117.08	972.696	1261.47	-0.361929	0.0783965	-4.55379	5.26877e-06	7.10306e-05	Ing1	protein_coding
ENSMUSG00000038552	4170.25	3725.36	4615.13	-0.30767	0.0672283	-4.55296	5.28976e-06	7.12123e-05	Fndc4	protein_coding
ENSMUSG00000041939	1132.98	1014.67	1251.29	-0.302503	0.0661845	-4.55295	5.28978e-06	7.12123e-05	Mvk	protein_coding
ENSMUSG00000026098	239.477	289.118	189.836	0.539755	0.112096	4.55258	5.29911e-06	7.12871e-05	Pms1	protein_coding
ENSMUSG00000020297	31045.7	28366.3	33725.1	-0.241895	0.0523797	-4.55165	5.32257e-06	7.15519e-05	Nsg2	protein_coding
ENSMUSG00000006464	2680.1	2921.12	2439.09	0.258696	0.0563549	4.55101	5.33881e-06	7.17192e-05	Bbs1	protein_coding
ENSMUSG00000039676	100.177	130.702	69.6523	0.727361	0.156798	4.54917	5.38591e-06	7.23005e-05	Capsl	protein_coding
ENSMUSG00000031776	5941.51	5352.84	6530.18	-0.279837	0.0606744	-4.54663	5.45117e-06	7.31246e-05	Arl2bp	protein_coding
ENSMUSG00000003575	6288.9	6894.11	5683.69	0.28407	0.0626089	4.54332	5.53745e-06	7.42294e-05	Crtc1	protein_coding
ENSMUSG00000107879	936.359	1074.17	798.548	0.405565	0.0876864	4.54074	5.6058e-06	7.50924e-05	9330102E08Rik
ENSMUSG00000019487	241.195	191.532	290.858	-0.534807	0.110682	-4.54009	5.62313e-06	7.5271e-05	Trip10	protein_coding
ENSMUSG00000032911	999.107	870.62	1127.59	-0.352521	0.0754888	-4.53991	5.62788e-06	7.52813e-05	Cspg4	protein_coding
ENSMUSG00000042997	678.55	761.854	595.246	0.349114	0.0760699	4.53877	5.65825e-06	7.56341e-05	Nhlrc3	protein_coding
ENSMUSG00000035847	24298.4	22041.3	26555.5	-0.266723	0.0582291	-4.53766	5.68811e-06	7.59794e-05	Ids	protein_coding
ENSMUSG00000020846	1370.78	1203.86	1537.69	-0.338344	0.0731813	-4.533	5.81514e-06	7.76214e-05	Rflnb	protein_coding
ENSMUSG00000032528	1141.91	1334.5	949.324	0.462467	0.101913	4.53213	5.83922e-06	7.78879e-05	Vipr1	protein_coding
ENSMUSG00000038292	84.5137	111.329	57.698	0.748617	0.155789	4.52956	5.91079e-06	7.87869e-05	Ccdc155	protein_coding
ENSMUSG00000009551	67.2401	44.3028	90.1774	-0.778777	0.162806	-4.52811	5.95128e-06	7.92708e-05	6330409D20Rik	protein_coding
ENSMUSG00000030127	3958.51	4415.3	3501.73	0.331028	0.07285	4.52793	5.9563e-06	7.92817e-05	Cops7a	protein_coding
ENSMUSG00000042354	1409.05	1253.18	1564.92	-0.30695	0.0663344	-4.52693	5.98457e-06	7.9602e-05	Gnl3	protein_coding
ENSMUSG00000022365	1560.15	1711.37	1408.92	0.279375	0.0611575	4.52567	6.02052e-06	8.00238e-05	Derl1	protein_coding
ENSMUSG00000031155	977.256	848.02	1106.49	-0.35827	0.0763824	-4.52316	6.09242e-06	8.09226e-05	Pim2	protein_coding
ENSMUSG00000023980	697.769	787.304	608.234	0.365114	0.0805699	4.52299	6.09717e-06	8.09287e-05	Taf8	protein_coding
ENSMUSG00000044816	365.012	438.823	291.201	0.534863	0.113741	4.52247	6.11227e-06	8.10308e-05	D630023F18Rik	protein_coding
ENSMUSG00000056158	3270.18	2925.06	3615.29	-0.289653	0.0624218	-4.52243	6.11343e-06	8.10308e-05	Car10	protein_coding
ENSMUSG00000027107	30.9966	45.9162	16.0769	0.879523	0.189805	4.52214	6.12163e-06	8.10827e-05	Chrna1	protein_coding
ENSMUSG00000028367	2593.75	2293.11	2894.38	-0.333851	0.0736289	-4.52179	6.13183e-06	8.11609e-05	Txn1	protein_coding
ENSMUSG00000030180	2201.09	2411.4	1990.79	0.26909	0.0585713	4.5183	6.23376e-06	8.24522e-05	Kdm5a	protein_coding
ENSMUSG00000030987	3724.69	4087.21	3362.18	0.273835	0.0597112	4.51732	6.26286e-06	8.27793e-05	Stim1	protein_coding
ENSMUSG00000025757	6366.31	5780.01	6952.61	-0.260645	0.0569216	-4.5162	6.29601e-06	8.31593e-05	Hspa4l	protein_coding
ENSMUSG00000116250	73.8777	100.687	47.0685	0.794969	0.17103	4.51333	6.38183e-06	8.42339e-05
ENSMUSG00000022376	1669.21	1468.55	1869.88	-0.330546	0.0713594	-4.51193	6.42395e-06	8.47306e-05	Adcy8	protein_coding
ENSMUSG00000086119	400.952	304.687	497.217	-0.608609	0.128908	-4.50964	6.49369e-06	8.55908e-05		antisense
ENSMUSG00000061759	765.668	866.96	664.375	0.368797	0.0806532	4.50744	6.5615e-06	8.64244e-05	Armt1	protein_coding
ENSMUSG00000044934	761.866	883.676	640.055	0.424022	0.0894028	4.50608	6.60366e-06	8.6919e-05	Zfp367	protein_coding
ENSMUSG00000025762	717.282	612.411	822.153	-0.405137	0.0886471	-4.50584	6.61099e-06	8.69549e-05	Larp1b	protein_coding
ENSMUSG00000015981	2841.56	2557.61	3125.52	-0.286586	0.0629987	-4.50492	6.63967e-06	8.72716e-05	Stk32c	protein_coding
ENSMUSG00000011658	527.672	609.129	446.215	0.42348	0.091655	4.5022	6.72531e-06	8.83357e-05	Fuz	protein_coding
ENSMUSG00000032507	2628.54	2371.9	2885.19	-0.278994	0.0613534	-4.49987	6.79944e-06	8.92474e-05	Fbxl2	protein_coding
ENSMUSG00000044933	1040.37	1195.44	885.297	0.421497	0.094851	4.49546	6.94181e-06	9.10529e-05	Sstr3	protein_coding
ENSMUSG00000020171	2189.67	2408.7	1970.64	0.27452	0.0595448	4.49446	6.97481e-06	9.14222e-05	Yeats4	protein_coding
ENSMUSG00000046593	299.831	239.29	360.371	-0.53672	0.11892	-4.49355	7.00471e-06	9.17505e-05	Tmem215	protein_coding
ENSMUSG00000026889	3050.83	3374.33	2727.32	0.295424	0.0645087	4.49254	7.03789e-06	9.21214e-05	Rbm18	protein_coding
ENSMUSG00000022665	939.278	778.533	1100.02	-0.462793	0.100906	-4.49136	7.07691e-06	9.2568e-05	Ccdc80	protein_coding
ENSMUSG00000027291	2953.89	3213.46	2694.32	0.254451	0.0563277	4.48864	7.1678e-06	9.36849e-05	Vps39	protein_coding
ENSMUSG00000042417	41.207	57.8945	24.5195	0.81742	0.182029	4.48851	7.17222e-06	9.36849e-05	Ccno	protein_coding
ENSMUSG00000029233	698.389	792.592	604.186	0.370459	0.0806201	4.48762	7.20244e-06	9.40147e-05	Srd5a3	protein_coding
ENSMUSG00000024072	1662.33	1868.95	1455.71	0.33886	0.0733293	4.48746	7.2079e-06	9.40211e-05	Yipf4	protein_coding
ENSMUSG00000056698	644.017	724.455	563.579	0.353886	0.0781651	4.48677	7.23117e-06	9.42596e-05	Elmod3	protein_coding
ENSMUSG00000020315	52917.5	48107.6	57727.5	-0.254667	0.0558995	-4.48558	7.27153e-06	9.47203e-05	Sptbn1	protein_coding
ENSMUSG00000026643	4654.55	4268.26	5040.84	-0.227657	0.0498076	-4.48454	7.30713e-06	9.51185e-05	Nmt2	protein_coding
ENSMUSG00000052446	550.374	466.972	633.776	-0.409346	0.0877116	-4.48427	7.31647e-06	9.51745e-05	Zfp961	protein_coding
ENSMUSG00000097545	9272.76	8170.28	10375.2	-0.320999	0.0692472	-4.48302	7.35942e-06	9.56674e-05	Mir124a-1hg	lincRNA
ENSMUSG00000037805	580.012	497.184	662.84	-0.39687	0.0875115	-4.48185	7.4e-06	9.61288e-05	Rpl10a	protein_coding
ENSMUSG00000069114	738.889	647.172	830.606	-0.347985	0.076431	-4.48074	7.43863e-06	9.65642e-05	Zbtb10	protein_coding
ENSMUSG00000071369	1765.89	1542.28	1989.51	-0.34724	0.0752257	-4.4794	7.48519e-06	9.7102e-05	Map3k5	protein_coding
ENSMUSG00000027650	784.664	878.112	691.216	0.343149	0.0766199	4.47655	7.5858e-06	9.83396e-05	Tti1	protein_coding
ENSMUSG00000018401	4102.22	3645.27	4559.18	-0.30449	0.0661955	-4.4762	7.59827e-06	9.84338e-05	Mtmr4	protein_coding
ENSMUSG00000062373	5937.79	5389.64	6485.94	-0.266987	0.0592373	-4.47579	7.61293e-06	9.85562e-05	Tmem65	protein_coding
ENSMUSG00000051235	190.928	234.293	147.564	0.584612	0.123263	4.47504	7.63977e-06	9.88359e-05	Gen1	protein_coding
ENSMUSG00000018548	15943.9	14528.6	17359.1	-0.26031	0.0580096	-4.47297	7.71396e-06	9.97274e-05	Trim37	protein_coding
ENSMUSG00000013629	884.098	750.961	1017.24	-0.408491	0.0885943	-4.47273	7.72287e-06	9.97744e-05	Cad	protein_coding
ENSMUSG00000030752	150.923	191.814	110.032	0.662108	0.141378	4.47243	7.73363e-06	9.98452e-05	Kdm8	protein_coding
ENSMUSG00000031284	6830.7	6028.7	7632.69	-0.333826	0.0740175	-4.46994	7.82403e-06	0.000100943	Pak3	protein_coding
ENSMUSG00000092274	921.41	1054.78	788.041	0.40098	0.0876634	4.46835	7.88251e-06	0.000101628	Neat1	lincRNA
ENSMUSG00000032366	8035.73	7394.4	8677.07	-0.232141	0.0516295	-4.46766	7.90806e-06	0.000101888	Tpm1	protein_coding
ENSMUSG00000086604	29.6549	43.801	15.5088	0.777053	0.192465	4.46706	7.93009e-06	0.000102103		processed_transcript
ENSMUSG00000024776	579.49	501.867	657.113	-0.376321	0.0835448	-4.4661	7.96593e-06	0.000102494	Stambpl1	protein_coding
ENSMUSG00000020986	6198.36	5677.21	6719.5	-0.247458	0.0552618	-4.465	8.00703e-06	0.000102953	Sec23a	protein_coding
ENSMUSG00000025465	1612.46	1449.29	1775.62	-0.291757	0.0649628	-4.46392	8.04741e-06	0.000103402	Echs1	protein_coding
ENSMUSG00000040022	4439.64	4915.03	3964.24	0.297503	0.0652936	4.46265	8.09523e-06	0.000103946	Rab11fip2	protein_coding
ENSMUSG00000056429	5358.57	5816.55	4900.6	0.247035	0.0550034	4.45882	8.24105e-06	0.000105746	Tgoln1	protein_coding
ENSMUSG00000052915	7833.8	7188.68	8478.91	-0.23489	0.0521432	-4.45778	8.28118e-06	0.000106189	Msl1	protein_coding
ENSMUSG00000020917	7238.1	6433.9	8042.3	-0.306914	0.0673154	-4.45556	8.36732e-06	0.000107221	Acly	protein_coding
ENSMUSG00000025905	373.984	267.797	480.17	-0.692964	0.140682	-4.45274	8.47799e-06	0.000108463	Oprk1	protein_coding
ENSMUSG00000025993	962.306	841.361	1083.25	-0.344691	0.0753543	-4.45281	8.47555e-06	0.000108463	Slc40a1	protein_coding
ENSMUSG00000039886	457.493	382.952	532.034	-0.442579	0.097567	-4.45266	8.48144e-06	0.000108463	Tmem120a	protein_coding
ENSMUSG00000054676	1065.37	1190.36	940.383	0.343707	0.0781484	4.45237	8.49294e-06	0.000108536	1600014C10Rik	protein_coding
ENSMUSG00000086771	37.1306	53.5745	20.6868	0.850418	0.1856	4.4494	8.61087e-06	0.000109969		lincRNA
ENSMUSG00000040451	1034.36	1159.89	908.827	0.334222	0.0730722	4.44854	8.64575e-06	0.00011034	Sgms1	protein_coding
ENSMUSG00000028364	2310.51	1897.51	2723.51	-0.47079	0.100818	-4.44797	8.66869e-06	0.000110558	Tnc	protein_coding
ENSMUSG00000020230	2716.87	2394.45	3039.29	-0.332841	0.0736979	-4.44775	8.6775e-06	0.000110596	Prmt2	protein_coding
ENSMUSG00000002767	838.94	950.115	727.765	0.36402	0.0793592	4.44686	8.71347e-06	0.000110926	Mrpl2	protein_coding
ENSMUSG00000031819	3102.45	3388.08	2816.81	0.251641	0.0553078	4.44682	8.71516e-06	0.000110926	Emc8	protein_coding
ENSMUSG00000062762	6215.5	6761.57	5669.42	0.243538	0.0537827	4.44566	8.76215e-06	0.000111449	Ei24	protein_coding
ENSMUSG00000055134	76.636	52.0687	101.203	-0.738934	0.160226	-4.44516	8.78252e-06	0.000111633		processed_transcript
ENSMUSG00000026404	498.921	583.591	414.251	0.44276	0.0926413	4.44492	8.7925e-06	0.000111685	Ddx59	protein_coding
ENSMUSG00000031930	1566.89	1721	1412.79	0.2877	0.0646543	4.44445	8.81155e-06	0.000111852	Wwp2	protein_coding
ENSMUSG00000024795	142.973	108.423	177.523	-0.609542	0.130368	-4.44369	8.8428e-06	0.000112173	Kif20b	protein_coding
ENSMUSG00000049148	248.379	185.283	311.475	-0.632196	0.141523	-4.4432	8.86318e-06	0.000112356	Plcxd3	protein_coding
ENSMUSG00000028034	6956.32	6401.32	7511.32	-0.2188	0.048358	-4.44269	8.88427e-06	0.000112548	Fubp1	protein_coding
ENSMUSG00000049489	473.095	546.772	399.417	0.415654	0.0895434	4.44022	8.9867e-06	0.000113769	Fam58b	protein_coding
ENSMUSG00000028868	983.819	847.533	1120.11	-0.37705	0.0823939	-4.44005	8.99363e-06	0.000113781	Wasf2	protein_coding
ENSMUSG00000004846	1222.05	1064.52	1379.58	-0.356439	0.0786742	-4.43971	9.00813e-06	0.000113888	Plod3	protein_coding
ENSMUSG00000037143	215.004	260.58	169.428	0.547921	0.119758	4.43955	9.01463e-06	0.000113894	Cfap61	protein_coding
ENSMUSG00000028551	185.907	146.693	225.121	-0.551249	0.123161	-4.43928	9.02619e-06	0.000113964	Cdkn2c	protein_coding
ENSMUSG00000020186	556.471	472.598	640.345	-0.41216	0.0912151	-4.43875	9.0481e-06	0.000114164	Csrp2	protein_coding
ENSMUSG00000026205	13.3937	22.8875	3.89987	0.844745	0.186724	4.43807	9.0771e-06	0.000114454	Slc23a3	protein_coding
ENSMUSG00000006638	295.88	232.422	359.337	-0.559955	0.135728	-4.43739	9.10555e-06	0.0001147	Abhd1	processed_transcript
ENSMUSG00000032064	4837.5	4431.43	5243.56	-0.254587	0.0577238	-4.43731	9.1088e-06	0.0001147	Dixdc1	protein_coding
ENSMUSG00000060371	14345	12724.5	15965.6	-0.32236	0.0720172	-4.43681	9.13003e-06	0.000114891	Caln1	protein_coding
ENSMUSG00000027164	1013.48	1126.7	900.254	0.321306	0.0719285	4.43596	9.1663e-06	0.000115271	Traf6	protein_coding
ENSMUSG00000046841	1589.57	1401.6	1777.54	-0.328027	0.0724138	-4.43411	9.24542e-06	0.000116189	Ckap4	protein_coding
ENSMUSG00000033707	686.54	597.758	775.323	-0.359306	0.0792927	-4.43245	9.31681e-06	0.000117008	C030006K11Rik	protein_coding
ENSMUSG00000031709	5773.58	5310.53	6236.63	-0.237466	0.0535	-4.43202	9.33527e-06	0.000117162	Tbc1d9	protein_coding
ENSMUSG00000029036	1481.88	1305.6	1658.17	-0.327815	0.0721165	-4.43019	9.41516e-06	0.000118086	Atad3a	protein_coding
ENSMUSG00000030695	15622.1	13670.1	17574.2	-0.338531	0.0739479	-4.42982	9.43116e-06	0.000118208	Aldoa	protein_coding
ENSMUSG00000071253	2067.7	2324.32	1811.07	0.337316	0.0738328	4.4266	9.57305e-06	0.000119907	Slc25a16	protein_coding
ENSMUSG00000047921	2158.06	2456.87	1859.25	0.387388	0.0868624	4.42269	9.7478e-06	0.000122015	Trappc9	protein_coding
ENSMUSG00000081272	1103.11	971.536	1234.68	-0.331444	0.0731514	-4.42083	9.83246e-06	0.000122994		processed_pseudogene
ENSMUSG00000022837	1013.84	1127.69	899.987	0.314263	0.0697469	4.41883	9.92363e-06	0.000124052	Iqcb1	protein_coding
ENSMUSG00000002329	1356.56	1214.16	1498.95	-0.306956	0.0696386	-4.41852	9.93786e-06	0.000124148	Mdp1	protein_coding
ENSMUSG00000033763	9486.08	8571.35	10400.8	-0.276014	0.0619189	-4.41733	9.99254e-06	0.000124748	Mtss1l	protein_coding
ENSMUSG00000040033	1293.99	1151.18	1436.8	-0.309047	0.0688309	-4.41356	1.01685e-05	0.000126862	Stat2	protein_coding
ENSMUSG00000075703	3729.6	3377.26	4081.93	-0.264732	0.0589476	-4.41189	1.02472e-05	0.000127759	Selenoi	protein_coding
ENSMUSG00000054910	105.244	135.411	75.078	0.686812	0.14874	4.41146	1.02676e-05	0.000127929	4931415C17Rik	processed_transcript
ENSMUSG00000022338	3571.75	3873.09	3270.42	0.240378	0.0538274	4.41066	1.03055e-05	0.000128316	Eny2	protein_coding
ENSMUSG00000026341	3339.45	3035.93	3642.98	-0.25305	0.0563585	-4.40962	1.03553e-05	0.000128851	Actr3	protein_coding
ENSMUSG00000063894	1403.53	1562.99	1244.08	0.323907	0.0726744	4.40869	1.03999e-05	0.000129321	Zkscan8	protein_coding
ENSMUSG00000100600	419.74	347.221	492.258	-0.447782	0.0945689	-4.40833	1.04171e-05	0.00012945	A230077H06Rik	antisense
ENSMUSG00000024442	1572.92	1734.99	1410.85	0.283584	0.0626395	4.40779	1.04431e-05	0.000129517	0610009O20Rik	protein_coding
ENSMUSG00000039449	2419.13	2623.66	2214.6	0.248325	0.0561174	4.40787	1.0439e-05	0.000129517	Prpf18	protein_coding
ENSMUSG00000058558	2332.38	2635.66	2029.1	0.357623	0.0789683	4.40795	1.04356e-05	0.000129517	Rpl5	protein_coding
ENSMUSG00000039166	4852.62	4259.71	5445.53	-0.355498	0.0813825	-4.40663	1.04989e-05	0.000130125	Akap7	protein_coding
ENSMUSG00000038418	5216.79	5957.47	4476.12	0.405622	0.0939959	4.40644	1.05083e-05	0.000130156	Egr1	protein_coding
ENSMUSG00000027575	3970.17	4321.46	3618.88	0.259677	0.0587918	4.40549	1.05546e-05	0.000130558	Arfgap1	protein_coding
ENSMUSG00000085289	69.7726	92.7383	46.8069	0.740741	0.164815	4.40563	1.05479e-05	0.000130558		antisense
ENSMUSG00000001103	100.73	142.31	59.1492	0.811546	0.184103	4.40336	1.06585e-05	0.000131671	Sebox	protein_coding
ENSMUSG00000040327	2178.01	2430.65	1925.36	0.338171	0.0773617	4.40346	1.06538e-05	0.000131671	Cul9	protein_coding
ENSMUSG00000030272	3505.52	3212.55	3798.5	-0.243005	0.0548463	-4.40312	1.06705e-05	0.000131732	Camk1	protein_coding
ENSMUSG00000021624	114.835	83.9912	145.679	-0.660742	0.143628	-4.40276	1.0688e-05	0.000131827	Cd180	protein_coding
ENSMUSG00000061086	326.307	394.069	258.545	0.534851	0.114758	4.40268	1.06921e-05	0.000131827	Myl4	protein_coding
ENSMUSG00000095567	2864.54	2535.69	3193.39	-0.305802	0.0668243	-4.40146	1.07523e-05	0.000132483	Noc2l	protein_coding
ENSMUSG00000109715	167.889	127.625	208.153	-0.607237	0.128587	-4.40127	1.07619e-05	0.000132515
ENSMUSG00000028849	8342.42	7499.86	9184.98	-0.273451	0.0604416	-4.4	1.08253e-05	0.000133209	Map7d1	protein_coding
ENSMUSG00000004837	275.214	220.551	329.877	-0.524618	0.116739	-4.39871	1.08897e-05	0.000133914	Grap	protein_coding
ENSMUSG00000104415	53.063	79.6983	26.4278	0.880619	0.19103	4.3983	1.09103e-05	0.00013408		TEC
ENSMUSG00000034275	5441.1	4901.82	5980.38	-0.266998	0.0589513	-4.39798	1.09265e-05	0.000134193	Igsf9b	protein_coding
ENSMUSG00000004508	1189.95	1044.63	1335.26	-0.343648	0.0772597	-4.3977	1.09407e-05	0.000134279	Gab2	protein_coding
ENSMUSG00000036986	509.912	580.957	438.867	0.390256	0.0887218	4.39747	1.09522e-05	0.000134333	Pml	protein_coding
ENSMUSG00000003949	4817.22	5468.63	4165.8	0.382378	0.0869697	4.39699	1.09761e-05	0.000134451	Hlf	protein_coding
ENSMUSG00000041303	1462.26	1605.6	1318.92	0.281158	0.0633876	4.39707	1.09722e-05	0.000134451	Gtf3c3	protein_coding
ENSMUSG00000030693	12.4342	21.7039	3.16458	0.865756	0.185261	4.39631	1.10109e-05	0.000134791	Klk10	protein_coding
ENSMUSG00000097039	569.674	490.839	648.51	-0.393944	0.0906626	-4.39452	1.11015e-05	0.000135812	Pvt1	lincRNA
ENSMUSG00000040631	2345.18	2017.47	2672.88	-0.394221	0.0899279	-4.39435	1.11107e-05	0.000135836	Dok4	protein_coding
ENSMUSG00000074781	4640.73	5036.6	4244.86	0.241216	0.0541716	4.3931	1.11746e-05	0.000136529	Ube2n	protein_coding
ENSMUSG00000035722	810.136	707.111	913.161	-0.350595	0.0777567	-4.39101	1.12824e-05	0.000137758	Abca7	protein_coding
ENSMUSG00000009566	403.94	334.667	473.213	-0.457853	0.101579	-4.38922	1.13759e-05	0.00013881	Fpgs	protein_coding
ENSMUSG00000047648	409.317	342.173	476.461	-0.446159	0.0997315	-4.38758	1.14618e-05	0.000139768	Fbxo30	protein_coding
ENSMUSG00000097960	67.4515	93.4552	41.4478	0.83276	0.172162	4.3864	1.15241e-05	0.000140436	A330074K22Rik	lincRNA
ENSMUSG00000024758	48287.5	43912	52663.1	-0.244644	0.0544153	-4.38515	1.15904e-05	0.000141153	Rtn3	protein_coding
ENSMUSG00000037833	51.977	31.4841	72.4698	-0.799989	0.180731	-4.38267	1.17231e-05	0.000142586	Sh2d4b	protein_coding
ENSMUSG00000061650	1354.36	1495.36	1213.36	0.295376	0.066611	4.38272	1.17206e-05	0.000142586	Med9	protein_coding
ENSMUSG00000041468	1057.56	913.004	1202.11	-0.371053	0.0820198	-4.38244	1.17359e-05	0.000142649	Gpr12	protein_coding
ENSMUSG00000039904	654.135	561.825	746.445	-0.387246	0.0858024	-4.38197	1.17611e-05	0.000142864	Gpr37	protein_coding
ENSMUSG00000024030	1075.25	1218.72	931.787	0.375097	0.0852302	4.38034	1.18493e-05	0.000143661	Abcg1	protein_coding
ENSMUSG00000037544	65.656	44.424	86.8881	-0.741264	0.163403	-4.38034	1.18495e-05	0.000143661	Dlgap5	protein_coding
ENSMUSG00000040701	605.594	690.149	521.038	0.3886	0.0866932	4.38038	1.1847e-05	0.000143661	Ap1g2	protein_coding
ENSMUSG00000059518	1141.54	966.333	1316.75	-0.422775	0.0953284	-4.37905	1.19197e-05	0.00014442	Znhit1	protein_coding
ENSMUSG00000039976	5990.45	5142.46	6838.45	-0.398395	0.09095	-4.37757	1.2001e-05	0.000145311	Tbc1d16	protein_coding
ENSMUSG00000020250	2806.79	2555.19	3058.38	-0.25278	0.0569513	-4.37624	1.20746e-05	0.000146109	Txnrd1	protein_coding
ENSMUSG00000031748	41271	36763.9	45778.1	-0.292166	0.0645148	-4.37548	1.21166e-05	0.000146524	Gnao1	protein_coding
ENSMUSG00000074505	4891.15	4377.69	5404.61	-0.287251	0.0639298	-4.37491	1.21484e-05	0.000146814	Fat3	protein_coding
ENSMUSG00000029869	4165.43	3635.17	4695.69	-0.358395	0.08113	-4.37417	1.21895e-05	0.000147216	Ephb6	protein_coding
ENSMUSG00000041119	1086.56	971.238	1201.89	-0.304026	0.0688286	-4.3736	1.22212e-05	0.000147505	Pde9a	protein_coding
ENSMUSG00000027209	129.499	93.7068	165.291	-0.660535	0.150836	-4.37271	1.22715e-05	0.000148018	Fam227b	protein_coding
ENSMUSG00000015095	4207.6	4609.19	3806.01	0.267604	0.060266	4.36942	1.24575e-05	0.000150166	Fbxw5	protein_coding
ENSMUSG00000020897	96.2179	68.9729	123.463	-0.675178	0.153912	-4.36783	1.25489e-05	0.000151171	Aurkb	protein_coding
ENSMUSG00000026188	1775.49	1594.59	1956.39	-0.293191	0.0666422	-4.36705	1.25936e-05	0.000151613	Tmem169	protein_coding
ENSMUSG00000020228	289.378	339.649	239.107	0.467138	0.103952	4.36054	1.29744e-05	0.000155998	Helb	protein_coding
ENSMUSG00000024878	670.93	777.132	564.728	0.423333	0.0927769	4.36056	1.2973e-05	0.000155998	Cbwd1	protein_coding
ENSMUSG00000022681	1390.61	1256.64	1524.59	-0.288327	0.0667384	-4.35968	1.30252e-05	0.000156509	Ntan1	protein_coding
ENSMUSG00000045174	1449.61	1261.71	1637.51	-0.355108	0.0792369	-4.35896	1.30679e-05	0.000156923	Amer3	protein_coding
ENSMUSG00000023505	163.835	126.33	201.339	-0.580121	0.130876	-4.35813	1.31178e-05	0.000157422	Cdca3	protein_coding
ENSMUSG00000039982	4431.97	3978.29	4885.65	-0.291631	0.0662871	-4.35623	1.32321e-05	0.000158692	Dtx4	protein_coding
ENSMUSG00000018678	500.882	577.346	424.419	0.429258	0.101468	4.35493	1.33109e-05	0.000159536	Sp2	protein_coding
ENSMUSG00000025938	506.593	406.967	606.218	-0.511705	0.112361	-4.35398	1.33688e-05	0.000160129	Slco5a1	protein_coding
ENSMUSG00000028136	6062.19	5601.98	6522.41	-0.212969	0.0482884	-4.35251	1.34589e-05	0.000161106	Snx27	protein_coding
ENSMUSG00000086822	61.9557	83.8027	40.1087	0.773811	0.169761	4.35126	1.35358e-05	0.000161925	5330413P13Rik	processed_transcript
ENSMUSG00000107134	279.347	222.63	336.063	-0.530357	0.119081	-4.34843	1.37117e-05	0.000163925
ENSMUSG00000024598	507.331	415.266	599.396	-0.487519	0.11221	-4.3462	1.38518e-05	0.000165495	Fbn2	protein_coding
ENSMUSG00000003062	1652.9	1494.06	1811.75	-0.275633	0.0628083	-4.34479	1.39407e-05	0.000166447	Stard3nl	protein_coding
ENSMUSG00000024891	573.996	481.153	666.839	-0.428497	0.0939301	-4.34466	1.39491e-05	0.000166447	Slc29a2	protein_coding
ENSMUSG00000035596	4163.7	3627	4700.39	-0.335993	0.0733075	-4.34149	1.41517e-05	0.000168757	Mboat7	protein_coding
ENSMUSG00000049287	492.802	560.058	425.546	0.380307	0.0862633	4.34135	1.4161e-05	0.000168762	Iba57	protein_coding
ENSMUSG00000048807	1015.78	874.866	1156.69	-0.381453	0.0860495	-4.34074	1.42006e-05	0.000169128	Slc35e4	protein_coding
ENSMUSG00000022905	6346.06	6902.15	5789.97	0.244101	0.0552874	4.3401	1.42418e-05	0.000169511	Kpna1	protein_coding
ENSMUSG00000025151	18247.8	16160.9	20334.8	-0.31245	0.0700352	-4.33923	1.42984e-05	0.000169971	Maged1	protein_coding
ENSMUSG00000032621	4826.43	5227.51	4425.35	0.245057	0.0563552	4.33928	1.42953e-05	0.000169971	Srek1	protein_coding
ENSMUSG00000003810	5431.97	4908.46	5955.47	-0.266345	0.0601133	-4.3389	1.43201e-05	0.000170122	Mast2	protein_coding
ENSMUSG00000024962	1274.59	1121.43	1427.74	-0.339827	0.0774428	-4.33821	1.43647e-05	0.000170545	Vegfb	protein_coding
ENSMUSG00000005034	24290.5	22339.1	26241.9	-0.229158	0.052293	-4.33625	1.44936e-05	0.000171967	Prkacb	protein_coding
ENSMUSG00000042604	844.298	728.271	960.326	-0.377701	0.0845773	-4.336	1.45099e-05	0.000172052	Kcna4	protein_coding
ENSMUSG00000052516	10838.5	9816.17	11860.9	-0.266298	0.0605385	-4.33562	1.45349e-05	0.000172241	Robo2	protein_coding
ENSMUSG00000020231	3314.46	2978.55	3650.37	-0.281998	0.0638013	-4.33337	1.46843e-05	0.000173903	Dip2a	protein_coding
ENSMUSG00000024158	2232.18	2512.06	1952.29	0.336953	0.0748858	4.33308	1.47039e-05	0.000174025	Hagh	protein_coding
ENSMUSG00000033722	304.859	360.545	249.173	0.487427	0.111614	4.33135	1.48198e-05	0.000175287	BC034090	protein_coding
ENSMUSG00000056004	2313.38	2091.37	2535.38	-0.273861	0.0624362	-4.33096	1.4846e-05	0.000175488	9330182L06Rik	protein_coding
ENSMUSG00000079469	997.578	1103.09	892.062	0.313455	0.0732581	4.32955	1.49411e-05	0.000176502	Pigb	protein_coding
ENSMUSG00000046994	1918.17	1723.43	2112.9	-0.28944	0.0662302	-4.3264	1.51568e-05	0.000178937	Mars2	protein_coding
ENSMUSG00000020782	40.2464	57.0482	23.4447	0.82692	0.184657	4.32607	1.51791e-05	0.000179088	Llgl2	protein_coding
ENSMUSG00000020758	222.216	173.554	270.878	-0.561301	0.129663	-4.32564	1.52092e-05	0.000179332	Itgb4	protein_coding
ENSMUSG00000089872	1920.01	1756.32	2083.7	-0.252263	0.0582555	-4.32414	1.53129e-05	0.000180442	Rps6kc1	protein_coding
ENSMUSG00000037946	435.449	357.939	512.959	-0.470007	0.104436	-4.32292	1.53977e-05	0.000181329	Fgd3	protein_coding
ENSMUSG00000036196	384.957	451.096	318.817	0.460081	0.10239	4.3225	1.54272e-05	0.000181562	Slc26a8	protein_coding
ENSMUSG00000105692	469.199	400.762	537.635	-0.396647	0.0885287	-4.3213	1.55113e-05	0.000182439
ENSMUSG00000070808	955.06	819.338	1090.78	-0.376811	0.0828751	-4.31956	1.56343e-05	0.000183771	Bicra	protein_coding
ENSMUSG00000028795	1417.92	1211.47	1624.36	-0.399502	0.0907463	-4.31803	1.57426e-05	0.000184929	Ccdc28b	protein_coding
ENSMUSG00000062257	16958.8	15379.1	18538.5	-0.260094	0.0591955	-4.31774	1.57636e-05	0.000185061	Opcml	protein_coding
ENSMUSG00000026470	2953.36	3212.49	2694.22	0.245428	0.0559334	4.31622	1.58724e-05	0.000186107	Stx6	protein_coding
ENSMUSG00000079434	136.793	176.038	97.5477	0.675294	0.154384	4.31629	1.58675e-05	0.000186107	Neu2	protein_coding
ENSMUSG00000036769	904.09	787.263	1020.92	-0.354795	0.0799041	-4.31476	1.59776e-05	0.000187224	Wdr44	protein_coding
ENSMUSG00000056952	1884.87	1696.68	2073.07	-0.288921	0.0666838	-4.31313	1.60963e-05	0.000188382	Tatdn2	protein_coding
ENSMUSG00000062127	1848.75	1652.8	2044.71	-0.294448	0.0668974	-4.31326	1.60864e-05	0.000188382	Cttnbp2nl	protein_coding
ENSMUSG00000019823	703.749	595.382	812.116	-0.42776	0.100732	-4.31239	1.615e-05	0.000188776	Mical1	protein_coding
ENSMUSG00000036764	245.695	294.901	196.488	0.519358	0.112474	4.31246	1.61448e-05	0.000188776	Dnajc12	protein_coding
ENSMUSG00000089682	4459.4	4823.23	4095.56	0.234048	0.0537544	4.31148	1.62162e-05	0.000189433	Bcl2l2	protein_coding
ENSMUSG00000030268	2835.41	2504.07	3166.74	-0.313729	0.0701299	-4.31102	1.62506e-05	0.000189718	Bcat1	protein_coding
ENSMUSG00000035517	1403.92	1252.53	1555.3	-0.300667	0.0682729	-4.31001	1.63246e-05	0.000190464	Tdrd7	protein_coding
ENSMUSG00000019796	6692.01	7341.12	6042.9	0.272945	0.0623913	4.30883	1.64121e-05	0.000191367	Lrp11	protein_coding
ENSMUSG00000022217	608.129	516.802	699.456	-0.410042	0.0933776	-4.30847	1.64385e-05	0.000191556	Emc9	protein_coding
ENSMUSG00000051864	965.76	1077	854.526	0.323847	0.0742942	4.30556	1.66562e-05	0.000193973	Tbc1d22a	protein_coding
ENSMUSG00000097787	117.89	148.125	87.6555	0.634092	0.136594	4.30532	1.66744e-05	0.000194066	2700046G09Rik	lincRNA
ENSMUSG00000048915	1250.84	1114.02	1387.66	-0.305734	0.0697589	-4.30399	1.67746e-05	0.000195112	Efna5	protein_coding
ENSMUSG00000005683	11237.3	10088	12386.6	-0.273402	0.0614802	-4.30228	1.6905e-05	0.000196387	Cs	protein_coding
ENSMUSG00000017386	1077.75	956.565	1198.94	-0.322045	0.0747489	-4.3023	1.69033e-05	0.000196387	Traf4	protein_coding
ENSMUSG00000032393	10262.6	11243.9	9281.18	0.262665	0.0596626	4.30203	1.69243e-05	0.00019649	Dpp8	protein_coding
ENSMUSG00000069565	1880.59	1669.06	2092.12	-0.30276	0.0680344	-4.30055	1.70374e-05	0.000197682	Dazap1	protein_coding
ENSMUSG00000097141	115.788	153.729	77.8473	0.736552	0.167443	4.30004	1.70764e-05	0.000198013		TEC
ENSMUSG00000026028	10589.9	9590.81	11589	-0.279881	0.0653663	-4.29878	1.71737e-05	0.00019902	Trak2	protein_coding
ENSMUSG00000059475	1608.75	1447.16	1770.34	-0.280997	0.064169	-4.29695	1.73165e-05	0.000200551	Zfp426	protein_coding
ENSMUSG00000030536	1985.92	1767.96	2203.88	-0.292366	0.0655073	-4.29588	1.74001e-05	0.000201396	Iqgap1	protein_coding
ENSMUSG00000026841	1147.36	1497.75	796.965	0.680596	0.170179	4.29506	1.74647e-05	0.00020202	Fibcd1	protein_coding
ENSMUSG00000110790	63.3631	84.2338	42.4925	0.734472	0.168071	4.29383	1.75614e-05	0.000203014
ENSMUSG00000020101	976.436	837.923	1114.95	-0.393449	0.0904336	-4.29362	1.75783e-05	0.000203085	Vsir	protein_coding
ENSMUSG00000079227	201.644	149.7	253.588	-0.631635	0.143658	-4.29319	1.76127e-05	0.000203359	Ccr5	protein_coding
ENSMUSG00000009640	942.297	1044.05	840.548	0.310358	0.071908	4.29297	1.76303e-05	0.000203437	Dmap1	protein_coding
ENSMUSG00000019846	1095.14	922.473	1267.82	-0.41732	0.0922189	-4.29211	1.76985e-05	0.000204073	Lama4	protein_coding
ENSMUSG00000051890	1087.95	1241.33	934.579	0.383383	0.0869813	4.292	1.77069e-05	0.000204073	Klhdc1	protein_coding
ENSMUSG00000079685	58.4885	37.6836	79.2935	-0.756023	0.174106	-4.29105	1.77827e-05	0.00020482	Ulbp1	protein_coding
ENSMUSG00000033061	775.32	623.213	927.427	-0.514364	0.11823	-4.28614	1.81807e-05	0.000209277	Resp18	protein_coding
ENSMUSG00000029823	9965.25	10803.2	9127.3	0.245052	0.0568883	4.285	1.82737e-05	0.00021022	Luc7l2	protein_coding
ENSMUSG00000019935	515.009	433.009	597.008	-0.44007	0.103634	-4.28377	1.83756e-05	0.000211264	Slc17a8	protein_coding
ENSMUSG00000017716	131.955	103.52	160.391	-0.5541	0.132292	-4.28357	1.83918e-05	0.000211321	Birc5	protein_coding
ENSMUSG00000029761	1510.47	1313.05	1707.88	-0.357519	0.0812338	-4.28268	1.84658e-05	0.000212043	Cald1	protein_coding
ENSMUSG00000025809	6229.11	5634.91	6823.31	-0.272352	0.0629465	-4.28103	1.86026e-05	0.000213171	Itgb1	protein_coding
ENSMUSG00000026200	818.541	932.556	704.526	0.386385	0.0884727	4.28096	1.86092e-05	0.000213171	Glb1l	protein_coding
ENSMUSG00000028528	12317.4	11219.5	13415.4	-0.245044	0.0560426	-4.28132	1.85785e-05	0.000213171	Dnajc6	protein_coding
ENSMUSG00000068117	35.0651	52.5911	17.5391	0.864962	0.191282	4.28108	1.85986e-05	0.000213171	Mei1	protein_coding
ENSMUSG00000075284	498.907	423.497	574.318	-0.411201	0.0940302	-4.27965	1.87189e-05	0.000214298	Wipf1	protein_coding
ENSMUSG00000030737	833.501	732.036	934.966	-0.336647	0.0769311	-4.27913	1.87624e-05	0.000214666	Slco2b1	protein_coding
ENSMUSG00000062190	4990.04	4578.54	5401.54	-0.240142	0.0558481	-4.27689	1.89525e-05	0.00021671	Lancl2	protein_coding
ENSMUSG00000023328	2784.94	2482.25	3087.63	-0.316636	0.0743897	-4.27571	1.90526e-05	0.000217591	Ache	protein_coding
ENSMUSG00000054675	530.074	433.176	626.972	-0.488585	0.113332	-4.27575	1.90497e-05	0.000217591	Tmem119	protein_coding
ENSMUSG00000038540	33.8212	49.3667	18.2758	0.862951	0.1881	4.27278	1.9305e-05	0.00022034	Tmc3	protein_coding
ENSMUSG00000000409	279.544	233.585	325.503	-0.447321	0.104234	-4.27256	1.93244e-05	0.000220429	Lck	protein_coding
ENSMUSG00000022791	4368.58	4775.75	3961.41	0.282384	0.0669864	4.27153	1.94136e-05	0.000221179	Tnk2	protein_coding
ENSMUSG00000035778	259.742	214.848	304.635	-0.461851	0.105061	-4.27156	1.94107e-05	0.000221179	Ggta1	protein_coding
ENSMUSG00000027574	626.27	718.355	534.185	0.390992	0.0868284	4.27028	1.95225e-05	0.000222286	Nkain4	protein_coding
ENSMUSG00000019235	1586.67	1408.85	1764.49	-0.313369	0.0722002	-4.26873	1.96592e-05	0.000223707	Rps6kl1	protein_coding
ENSMUSG00000097769	328.258	268.229	388.286	-0.485945	0.112796	-4.26759	1.97595e-05	0.000224714	Snhg4	processed_transcript
ENSMUSG00000024330	1057.93	864.533	1251.32	-0.481068	0.108459	-4.26605	1.9896e-05	0.00022613	Col11a2	protein_coding
ENSMUSG00000000126	768.527	661.411	875.644	-0.386815	0.0893488	-4.26536	1.99579e-05	0.000226442	Wnt9a	protein_coding
ENSMUSG00000024063	2188.01	1966.99	2409.03	-0.289693	0.0673478	-4.26534	1.99594e-05	0.000226442	Lbh	protein_coding
ENSMUSG00000049538	422.883	357.279	488.488	-0.416804	0.0945553	-4.2654	1.99548e-05	0.000226442	Adamts16	protein_coding
ENSMUSG00000063694	456.204	389.571	522.836	-0.402433	0.0929688	-4.26489	2.00004e-05	0.000226772	Cycs	protein_coding
ENSMUSG00000065990	1864.19	2124.97	1603.4	0.375142	0.0842855	4.26383	2.00951e-05	0.000227709	Aurkaip1	protein_coding
ENSMUSG00000038555	5454.91	4925.67	5984.15	-0.27144	0.0625737	-4.26192	2.02682e-05	0.000229395	Reep2	protein_coding
ENSMUSG00000085042	33.5382	48.9273	18.1492	0.859876	0.187456	4.26194	2.02657e-05	0.000229395	Abhd11os	antisense
ENSMUSG00000070420	380.016	434.498	325.534	0.39566	0.0912936	4.26114	2.03383e-05	0.00023005	Zscan25	protein_coding
ENSMUSG00000018417	2552.58	2302.74	2802.43	-0.263809	0.0600676	-4.25914	2.0521e-05	0.000231802	Myo1b	protein_coding
ENSMUSG00000039068	2597.32	2840.51	2354.14	0.265996	0.0617553	4.25918	2.05178e-05	0.000231802	Zzz3	protein_coding
ENSMUSG00000062991	538.744	472.433	605.056	-0.35286	0.0830721	-4.25905	2.05299e-05	0.000231802	Nrg1	protein_coding
ENSMUSG00000002908	1154.09	1023.63	1284.55	-0.322903	0.0752595	-4.25858	2.05725e-05	0.000232144	Kcnn1	protein_coding
ENSMUSG00000024952	1117.02	1003.26	1230.79	-0.297651	0.0701527	-4.25777	2.06473e-05	0.000232849	Rps6ka4	protein_coding
ENSMUSG00000019809	1275.77	1417.36	1134.19	0.303404	0.0692389	4.25706	2.07134e-05	0.000233455	Pex3	protein_coding
ENSMUSG00000071350	299.889	349.498	250.279	0.44557	0.101173	4.25687	2.07309e-05	0.000233513	Setdb2	protein_coding
ENSMUSG00000022401	818.976	909.341	728.612	0.319652	0.0752411	4.25527	2.08799e-05	0.000235051	Xpnpep3	protein_coding
ENSMUSG00000027200	3928.53	3503.42	4353.64	-0.293825	0.0670234	-4.25387	2.10106e-05	0.000236382	Sema6d	protein_coding
ENSMUSG00000005237	461.617	537.807	385.426	0.438773	0.0987406	4.25201	2.11856e-05	0.000238209	Dnah2	protein_coding
ENSMUSG00000021245	1262.55	1407.58	1117.51	0.311647	0.0708607	4.25132	2.12516e-05	0.000238809	Mlh3	protein_coding
ENSMUSG00000053897	587.407	501.262	673.552	-0.401436	0.0930331	-4.24789	2.15795e-05	0.00024235	Slc39a8	protein_coding
ENSMUSG00000032030	3610.2	3962.72	3257.69	0.269457	0.0620526	4.24596	2.17658e-05	0.000244297	Cul5	protein_coding
ENSMUSG00000038760	307.253	245.885	368.622	-0.514834	0.115232	-4.24545	2.18155e-05	0.000244709	Trhr	protein_coding
ENSMUSG00000033712	4007.79	4371.91	3643.67	0.267954	0.0631858	4.2451	2.18495e-05	0.000244945	Ccar2	protein_coding
ENSMUSG00000029911	819.356	914.53	724.182	0.328045	0.0762298	4.24371	2.19851e-05	0.00024632	Ssbp1	protein_coding
ENSMUSG00000031749	3880.53	3518.92	4242.15	-0.263788	0.0613406	-4.24284	2.20708e-05	0.000247133	St3gal2	protein_coding
ENSMUSG00000000282	1393.81	1217.55	1570.06	-0.349662	0.0808564	-4.24266	2.20883e-05	0.000247182	Mnt	protein_coding
ENSMUSG00000001891	2983.66	2613.32	3354	-0.350569	0.0819741	-4.24179	2.21746e-05	0.000248001	Ugp2	protein_coding
ENSMUSG00000025421	2851.98	3113.19	2590.77	0.264355	0.0619342	4.2413	2.22225e-05	0.00024839	Hdhd2	protein_coding
ENSMUSG00000078716	4143.53	4488.51	3798.56	0.234954	0.0546748	4.24066	2.22862e-05	0.000248955	Tmem8b	protein_coding
ENSMUSG00000031994	311.277	259.298	363.257	-0.444306	0.100874	-4.23962	2.23902e-05	0.000249969	Adamts8	protein_coding
ENSMUSG00000036779	2138.06	2317.48	1958.64	0.244975	0.0575231	4.23847	2.25049e-05	0.000250805	Papd5	protein_coding
ENSMUSG00000042857	170.202	207.605	132.799	0.557415	0.127942	4.23855	2.24963e-05	0.000250805	Gm9776	protein_coding
ENSMUSG00000045427	3097.38	3357.44	2837.33	0.244781	0.057462	4.23858	2.24936e-05	0.000250805	Hnrnph2	protein_coding
ENSMUSG00000022033	144.959	104.571	185.346	-0.659486	0.152245	-4.23705	2.26478e-05	0.000252249	Pbk	protein_coding
ENSMUSG00000073234	33.5707	14.4606	52.6808	-0.826945	0.19267	-4.23655	2.26983e-05	0.000252662	Gm8773	protein_coding
ENSMUSG00000025407	168.624	211.638	125.609	0.638622	0.13823	4.23604	2.275e-05	0.000253089	Gli1	protein_coding
ENSMUSG00000035776	6254.18	5494.51	7013.85	-0.339061	0.0787786	-4.23372	2.29861e-05	0.000255565	Cd99l2	protein_coding
ENSMUSG00000032172	5695.47	5159.14	6231.81	-0.26768	0.0625212	-4.23215	2.31463e-05	0.000257044	Olfm2	protein_coding
ENSMUSG00000063060	193.243	149.717	236.768	-0.566381	0.125662	-4.23219	2.31423e-05	0.000257044	Sox7	protein_coding
ENSMUSG00000038685	1367.5	1507.8	1227.2	0.293979	0.0689226	4.23127	2.32377e-05	0.000257907	Rtel1	protein_coding
ENSMUSG00000035173	2376.25	2146.29	2606.21	-0.285442	0.067708	-4.22928	2.34436e-05	0.00026004	Ccdc186	protein_coding
ENSMUSG00000008682	185.829	144.706	226.953	-0.56217	0.128695	-4.2287	2.3505e-05	0.000260499	Rpl10	protein_coding
ENSMUSG00000058441	2634.04	2351.96	2916.13	-0.297769	0.0690108	-4.22862	2.35126e-05	0.000260499	Panx2	protein_coding
ENSMUSG00000015357	1166.19	1289.28	1043.11	0.291045	0.0672448	4.2282	2.35568e-05	0.000260836	Clpx	protein_coding
ENSMUSG00000034098	1795.22	1592.97	1997.46	-0.310402	0.0716996	-4.22689	2.36945e-05	0.000262207	Fstl5	protein_coding
ENSMUSG00000021036	2551.91	2309.43	2794.4	-0.264327	0.0613923	-4.22574	2.38157e-05	0.000263394	Sptlc2	protein_coding
ENSMUSG00000089809	1806.45	1559.67	2053.23	-0.376921	0.0871589	-4.22507	2.38868e-05	0.000264026	A930011G23Rik	protein_coding
ENSMUSG00000042116	1015.93	875.066	1156.79	-0.375681	0.0861004	-4.22467	2.39288e-05	0.000264336	Vwa1	protein_coding
ENSMUSG00000063661	79.3513	104.603	54.0996	0.694303	0.170347	4.22412	2.39872e-05	0.000264825	Krt73	protein_coding
ENSMUSG00000032578	292.815	248.493	337.136	-0.429269	0.107551	-4.22369	2.40338e-05	0.000265185	Cish	protein_coding
ENSMUSG00000061755	4655.73	5169.16	4142.3	0.311375	0.0728681	4.22207	2.42069e-05	0.000266939	Bod1l	protein_coding
ENSMUSG00000021696	520.05	426.534	613.566	-0.483576	0.113262	-4.22085	2.43387e-05	0.000268178	Elovl7	protein_coding
ENSMUSG00000024870	5321.43	5812.42	4830.44	0.259942	0.0606975	4.22076	2.43476e-05	0.000268178	Rab1b	protein_coding
ENSMUSG00000035711	204.305	159.784	248.827	-0.556272	0.125787	-4.22056	2.43692e-05	0.000268259	Dok3	protein_coding
ENSMUSG00000029636	5270.89	5710.39	4831.39	0.237797	0.055704	4.2204	2.43872e-05	0.000268301	Wasf3	protein_coding
ENSMUSG00000068921	2772.56	3011.85	2533.28	0.24122	0.0562373	4.21863	2.45791e-05	0.000270255	Dap3	protein_coding
ENSMUSG00000038619	11326.2	12590.1	10062.3	0.309117	0.071734	4.2167	2.47907e-05	0.000272424	Ensa	protein_coding
ENSMUSG00000049303	932.518	1111.4	753.639	0.501961	0.116591	4.21647	2.4816e-05	0.000272543	Syt12	protein_coding
ENSMUSG00000041565	97.0209	70.505	123.537	-0.652582	0.151593	-4.21338	2.51582e-05	0.000276141	L3mbtl4	protein_coding
ENSMUSG00000038975	2001.07	1818.13	2184.02	-0.266914	0.0631939	-4.21321	2.51767e-05	0.000276184	Rabggtb	protein_coding
ENSMUSG00000019054	3240.2	3583.67	2896.72	0.287066	0.0660737	4.21194	2.53191e-05	0.000277585	Fis1	protein_coding
ENSMUSG00000037234	5114.98	4716.54	5513.42	-0.226788	0.0535595	-4.20829	2.57315e-05	0.000281943	Hook3	protein_coding
ENSMUSG00000005936	3907.12	3613.32	4200.92	-0.216935	0.0511611	-4.20736	2.58372e-05	0.000282937	Kctd20	protein_coding
ENSMUSG00000086896	48.1212	66.0223	30.2201	0.775215	0.178182	4.20478	2.61342e-05	0.000286023	Cyp4x1os	antisense
ENSMUSG00000097123	169.357	203.674	135.04	0.532293	0.126849	4.20265	2.63813e-05	0.000288561		lincRNA
ENSMUSG00000114827	386.066	319.806	452.326	-0.470006	0.116059	-4.20116	2.65548e-05	0.00029029
ENSMUSG00000006494	2518.17	2736.87	2299.47	0.244908	0.0574704	4.20057	2.66245e-05	0.000290884	Pdk1	protein_coding
ENSMUSG00000024502	3895.67	3553.14	4238.2	-0.258175	0.0614035	-4.19924	2.67812e-05	0.000291753	Jakmip2	protein_coding
ENSMUSG00000036905	931.08	825.066	1037.09	-0.328735	0.0785971	-4.19968	2.67297e-05	0.000291753	C1qb	protein_coding
ENSMUSG00000044768	1751.65	1591.42	1911.87	-0.268836	0.0639001	-4.19938	2.6765e-05	0.000291753	D1Ertd622e	protein_coding
ENSMUSG00000053825	6637.2	6046.09	7228.31	-0.251702	0.0591164	-4.19931	2.67734e-05	0.000291753	Ppfia2	protein_coding
ENSMUSG00000087620	365.155	299.342	430.967	-0.479682	0.112102	-4.19924	2.67807e-05	0.000291753	5330434G04Rik	lincRNA
ENSMUSG00000021209	993.049	1119.18	866.923	0.363425	0.0877622	4.19854	2.6864e-05	0.000292487	Ppp4r4	protein_coding
ENSMUSG00000041096	3192.1	2913.49	3470.7	-0.239355	0.0557611	-4.19794	2.69357e-05	0.000293098	Tspyl2	protein_coding
ENSMUSG00000031242	3967.74	3599.32	4336.16	-0.269601	0.0639408	-4.19732	2.70088e-05	0.000293724	2610002M06Rik	protein_coding
ENSMUSG00000070003	5200.1	5887.4	4512.8	0.367329	0.0865308	4.19626	2.71362e-05	0.000294941	Ssbp4	protein_coding
ENSMUSG00000091996	33.0422	51.8083	14.2761	0.821806	0.192722	4.19565	2.72092e-05	0.000295564	BC049352	protein_coding
ENSMUSG00000037847	225.658	272.945	178.371	0.536779	0.119357	4.19509	2.72761e-05	0.00029612	Nmrk1	protein_coding
ENSMUSG00000033006	1305.05	1120.38	1489.71	-0.384834	0.0890314	-4.19449	2.73484e-05	0.000296735	Sox10	protein_coding
ENSMUSG00000022827	412.056	472.897	351.215	0.403411	0.0938098	4.19325	2.7498e-05	0.000298154	Rabl3	protein_coding
ENSMUSG00000024187	641.127	554.22	728.034	-0.36652	0.0844763	-4.19315	2.75107e-05	0.000298154	Fam234a	protein_coding
ENSMUSG00000029559	4542.35	4977.9	4106.8	0.269149	0.0631539	4.19052	2.78312e-05	0.000301282	2210016L21Rik	protein_coding
ENSMUSG00000104960	342.628	398.952	286.304	0.441742	0.101899	4.19062	2.78192e-05	0.000301282	Snhg8
ENSMUSG00000074738	762.941	850.282	675.6	0.326878	0.0776721	4.19	2.78956e-05	0.000301806	Fndc10	protein_coding
ENSMUSG00000074136	89.4089	114.8	64.0183	0.661626	0.159698	4.18883	2.80398e-05	0.000303193	4930513N10Rik	processed_transcript
ENSMUSG00000041552	408.419	353.895	462.943	-0.379327	0.091107	-4.18714	2.82496e-05	0.000305286	Ptchd1	protein_coding
ENSMUSG00000036896	974.651	866.543	1082.76	-0.317115	0.0755023	-4.18662	2.83137e-05	0.000305804	C1qc	protein_coding
ENSMUSG00000038060	106.986	133.16	80.8116	0.597536	0.14655	4.18585	2.84104e-05	0.000306673	Dlec1	protein_coding
ENSMUSG00000045822	317.182	257.846	376.519	-0.484532	0.109128	-4.1848	2.85413e-05	0.00030791	Zswim3	protein_coding
ENSMUSG00000090841	2702.75	2377.41	3028.08	-0.342939	0.0818395	-4.18367	2.86836e-05	0.000309269	Myl6	protein_coding
ENSMUSG00000029030	4104.35	3731	4477.69	-0.2663	0.063566	-4.18291	2.87801e-05	0.000310133	Tprgl	protein_coding
ENSMUSG00000029657	11322.5	10353	12292	-0.227989	0.0530065	-4.18262	2.88173e-05	0.000310357	Hsph1	protein_coding
ENSMUSG00000058503	1613.66	1781.1	1446.22	0.288062	0.0673905	4.1823	2.88579e-05	0.000310617	Fam133b	protein_coding
ENSMUSG00000020652	246.953	293.609	200.296	0.494619	0.11359	4.18192	2.89061e-05	0.000310958	Cenpo	protein_coding
ENSMUSG00000011254	668.259	753.546	582.972	0.338849	0.0770369	4.1808	2.9048e-05	0.000312308	Thg1l	protein_coding
ENSMUSG00000003153	7168.4	6377.99	7958.81	-0.291601	0.0669424	-4.17904	2.92744e-05	0.000314562	Slc2a3	protein_coding
ENSMUSG00000029029	747.422	833.638	661.205	0.332733	0.0801744	4.17835	2.93633e-05	0.000315338	Wrap73	protein_coding
ENSMUSG00000004366	6595.01	7538	5652.01	0.394323	0.093203	4.17716	2.95173e-05	0.000316643	Sst	protein_coding
ENSMUSG00000032131	2244.94	1970.94	2518.93	-0.322123	0.0735349	-4.17715	2.95183e-05	0.000316643	Abcg4	protein_coding
ENSMUSG00000020109	1830.04	2032.65	1627.42	0.312181	0.0739749	4.17445	2.9871e-05	0.000320245	Dnajb12	protein_coding
ENSMUSG00000028793	2171.61	1927	2416.23	-0.319432	0.0758995	-4.17369	2.99701e-05	0.000321126	Rnf19b	protein_coding
ENSMUSG00000038936	2832.63	2590.58	3074.69	-0.246143	0.0584748	-4.17274	3.00962e-05	0.000322294	Sccpdh	protein_coding
ENSMUSG00000027584	1916.01	1736.69	2095.32	-0.272474	0.0651328	-4.17223	3.01629e-05	0.000322825	Oprl1	protein_coding
ENSMUSG00000070564	28.6879	41.9377	15.4381	0.833243	0.189925	4.17183	3.02158e-05	0.000323208	Ntn5	protein_coding
ENSMUSG00000087380	104.882	79.0552	130.709	-0.606766	0.146865	-4.17148	3.02628e-05	0.000323528	2210408F21Rik	processed_transcript
ENSMUSG00000029528	1436.96	1582.7	1291.23	0.293839	0.0702863	4.17123	3.02955e-05	0.000323694	Pxn	protein_coding
ENSMUSG00000046169	320.343	261.069	379.617	-0.483397	0.110096	-4.17088	3.03425e-05	0.000324014	Adamts6	protein_coding
ENSMUSG00000052040	4902.64	4383.79	5421.48	-0.284252	0.0658434	-4.17053	3.03891e-05	0.000324328	Klf13	protein_coding
ENSMUSG00000078700	503.168	440.384	565.952	-0.363843	0.0896866	-4.17024	3.0428e-05	0.000324559	D030028A08Rik	processed_transcript
ENSMUSG00000028085	871.468	982.725	760.21	0.348249	0.0811673	4.16895	3.06008e-05	0.000326219	Gatb	protein_coding
ENSMUSG00000025510	915.98	802.111	1029.85	-0.344177	0.0808697	-4.16869	3.06359e-05	0.000326409	Cd151	protein_coding
ENSMUSG00000025348	564.552	474.799	654.306	-0.42389	0.0983506	-4.16756	3.07877e-05	0.000327572	Itga7	protein_coding
ENSMUSG00000045201	452.726	391.95	513.502	-0.373795	0.0885665	-4.16749	3.07971e-05	0.000327572	Lrrc3b	protein_coding
ENSMUSG00000055067	1474.59	1647.86	1301.32	0.323376	0.0757091	4.16771	3.07676e-05	0.000327572	Smyd3	protein_coding
ENSMUSG00000020887	38.8411	23.5127	54.1694	-0.763043	0.184706	-4.16725	3.08292e-05	0.00032773	A230052G05Rik	protein_coding
ENSMUSG00000028639	12045.6	10689	13402.3	-0.332697	0.0813635	-4.16262	3.14619e-05	0.000334267	Ybx1	protein_coding
ENSMUSG00000019978	8367.25	7694.33	9040.17	-0.227103	0.0538536	-4.16241	3.14913e-05	0.000334391	Epb41l2	protein_coding
ENSMUSG00000092203	388.86	326.936	450.783	-0.43017	0.102312	-4.1621	3.15329e-05	0.000334646	1110038B12Rik	processed_transcript
ENSMUSG00000021982	2016.28	2216.55	1816.01	0.277367	0.0654801	4.1616	3.1602e-05	0.000335003	Cdadc1	protein_coding
ENSMUSG00000079598	3664.76	4099.84	3229.68	0.326538	0.076585	4.16165	3.15954e-05	0.000335003	Clec2l	protein_coding
ENSMUSG00000026655	841.727	722.685	960.769	-0.39215	0.0933711	-4.16132	3.16408e-05	0.000335225	Fam107b	protein_coding
ENSMUSG00000104279	109.991	137.1	82.8813	0.608253	0.140185	4.15633	3.23401e-05	0.000342443		TEC
ENSMUSG00000102224	12.1285	21.5428	2.71416	0.821579	0.181497	4.15607	3.2377e-05	0.000342642	4930447F24Rik	processed_transcript
ENSMUSG00000027379	94.5195	68.8339	120.205	-0.646351	0.152864	-4.15565	3.24358e-05	0.000343072	Bub1	protein_coding
ENSMUSG00000026675	1157.4	1046.56	1268.25	-0.275428	0.065747	-4.15542	3.24689e-05	0.00034323	Hsd17b7	protein_coding
ENSMUSG00000017858	1353.1	1487.18	1219.02	0.276474	0.0653297	4.15459	3.25871e-05	0.000344094	Ift52	protein_coding
ENSMUSG00000036985	3039.68	2736.86	3342.51	-0.272039	0.0636542	-4.15459	3.25866e-05	0.000344094	Zdhhc9	protein_coding
ENSMUSG00000103707	171.62	132.781	210.458	-0.573266	0.14063	-4.15393	3.26819e-05	0.000344903	Pcdha6	protein_coding
ENSMUSG00000031297	409.083	336.234	481.932	-0.469414	0.109751	-4.15327	3.27762e-05	0.000345704	Slc7a3	protein_coding
ENSMUSG00000051499	209.761	172.053	247.468	-0.477111	0.114839	-4.15113	3.30843e-05	0.000348759	Zfp786	protein_coding
ENSMUSG00000001036	4868.49	4501.11	5235.87	-0.217745	0.0520365	-4.15016	3.32247e-05	0.000350045	Epn2	protein_coding
ENSMUSG00000031665	1157.85	1006.3	1309.4	-0.352382	0.081813	-4.14976	3.32822e-05	0.000350455	Sall1	protein_coding
ENSMUSG00000024112	3746.23	3241.74	4250.71	-0.366288	0.085797	-4.14805	3.3532e-05	0.000352889	Cacna1h	protein_coding
ENSMUSG00000038708	5328.46	5767.72	4889.2	0.242028	0.0582142	4.14671	3.37289e-05	0.000354764	Golga4	protein_coding
ENSMUSG00000017692	893.579	999.147	788.01	0.338781	0.0821382	4.14414	3.41092e-05	0.000358564	Rhbdl3	protein_coding
ENSMUSG00000040669	2938.79	3180.36	2697.21	0.239823	0.0576257	4.1436	3.419e-05	0.000359213	Phc1	protein_coding
ENSMUSG00000003849	139.051	169.46	108.642	0.555548	0.130698	4.14271	3.43226e-05	0.00036027	Nqo1	protein_coding
ENSMUSG00000033220	135.968	106.984	164.951	-0.541027	0.138559	-4.14267	3.43287e-05	0.00036027	Rac2	protein_coding
ENSMUSG00000103695	213.048	168.088	258.007	-0.53982	0.136748	-4.14219	3.44008e-05	0.000360827	A830029E22Rik	lincRNA
ENSMUSG00000020330	193.735	151.273	236.197	-0.555325	0.130219	-4.14162	3.44859e-05	0.000361518	Hmmr	protein_coding
ENSMUSG00000032575	1749.32	1549.58	1949.06	-0.334304	0.0818379	-4.14071	3.46238e-05	0.000362763	Manf	protein_coding
ENSMUSG00000026219	11286.2	12170.7	10401.7	0.230961	0.0556409	4.14033	3.46803e-05	0.000362952	Trip12	protein_coding
ENSMUSG00000043670	4138.6	3675.77	4601.44	-0.308584	0.0728266	-4.14045	3.46618e-05	0.000362952	Diras1	protein_coding
ENSMUSG00000092083	1306.77	1147.74	1465.8	-0.336722	0.0796036	-4.1401	3.47154e-05	0.000363119	Kcnb2	protein_coding
ENSMUSG00000033186	2379.21	2692.12	2066.3	0.356493	0.0832844	4.13951	3.48048e-05	0.000363853	Mzt1	protein_coding
ENSMUSG00000026888	1034.31	899.888	1168.72	-0.366901	0.0889078	-4.1392	3.48526e-05	0.00036415	Grb14	protein_coding
ENSMUSG00000006589	882.708	775.066	990.35	-0.347646	0.0843224	-4.13595	3.53494e-05	0.000369137	Aprt	protein_coding
ENSMUSG00000043323	2739.01	2997.7	2480.31	0.261527	0.0619009	4.13547	3.54233e-05	0.000369705	Fbrsl1	protein_coding
ENSMUSG00000022641	1004.7	1127.68	881.716	0.348808	0.0842621	4.13312	3.57878e-05	0.000373209	Bbx	protein_coding
ENSMUSG00000041642	27331.6	24099	30564.2	-0.338176	0.0818014	-4.13305	3.57986e-05	0.000373209	Kif21b	protein_coding
ENSMUSG00000003226	7049.31	7664.38	6434.24	0.248734	0.0595094	4.13269	3.58535e-05	0.000373576	Ranbp2	protein_coding
ENSMUSG00000032456	39.4941	55.5968	23.3914	0.769907	0.186864	4.13226	3.59219e-05	0.000374082	Nmnat3	protein_coding
ENSMUSG00000005897	538.119	607.916	468.322	0.366073	0.0889387	4.12954	3.63494e-05	0.000378303	Nr2c1	protein_coding
ENSMUSG00000071636	113.84	142.442	85.2383	0.622293	0.140952	4.12942	3.63673e-05	0.000378303	Rimbp3	protein_coding
ENSMUSG00000028926	7283.63	6625.36	7941.9	-0.263709	0.0636969	-4.129	3.64341e-05	0.00037879	Cdk14	protein_coding
ENSMUSG00000056267	857.071	959.736	754.407	0.333647	0.0794104	4.1271	3.6737e-05	0.00038173	Cep70	protein_coding
ENSMUSG00000035960	1382.78	1248.97	1516.58	-0.278443	0.0671294	-4.12588	3.69312e-05	0.000383536	Apex1	protein_coding
ENSMUSG00000020629	1147.59	1290.17	1005	0.340434	0.0806213	4.12464	3.71309e-05	0.000385398	Adi1	protein_coding
ENSMUSG00000006932	30666.9	32728.1	28605.6	0.193907	0.0466928	4.12324	3.73586e-05	0.000387319	Ctnnb1	protein_coding
ENSMUSG00000022064	670.128	753.771	586.486	0.344025	0.0812341	4.12337	3.73375e-05	0.000387319	Pibf1	protein_coding
ENSMUSG00000022505	2116.53	1858.05	2375.01	-0.333913	0.0787017	-4.12299	3.73979e-05	0.000387319	Emp2	protein_coding
ENSMUSG00000071708	3083.17	2778.14	3388.2	-0.272477	0.0645559	-4.123	3.73969e-05	0.000387319	Sms	protein_coding
ENSMUSG00000019102	78.1655	101.948	54.3828	0.708969	0.157588	4.12286	3.74193e-05	0.000387329	Aldh3a1	protein_coding
ENSMUSG00000114961	21.3644	32.9721	9.75657	0.84118	0.19308	4.12236	3.7501e-05	0.000387962	A930002C04Rik
ENSMUSG00000039943	2708.87	3009.6	2408.13	0.308056	0.0733137	4.12196	3.75661e-05	0.000388423	Plcb4	protein_coding
ENSMUSG00000047181	4094.03	3505.55	4682.52	-0.400617	0.0975574	-4.12108	3.77103e-05	0.000389618	Samd14	protein_coding
ENSMUSG00000097284	550.987	644.35	457.625	0.449372	0.106512	4.121	3.77229e-05	0.000389618	4930480K23Rik	lincRNA
ENSMUSG00000020773	138.894	102.524	175.264	-0.630123	0.144049	-4.12071	3.77704e-05	0.000389896	Trim47	protein_coding
ENSMUSG00000038267	4700.59	4298.06	5103.12	-0.234732	0.0557394	-4.12029	3.78396e-05	0.000390396	Slc22a23	protein_coding
ENSMUSG00000076437	670.172	565.46	774.883	-0.424402	0.102335	-4.11825	3.81754e-05	0.000393646	Selenoh	protein_coding
ENSMUSG00000020717	980.381	854.344	1106.42	-0.343575	0.079824	-4.11703	3.83781e-05	0.000395521	Pecam1	protein_coding
ENSMUSG00000025130	5326.49	4938.42	5714.56	-0.211657	0.051093	-4.11591	3.85652e-05	0.000397233	P4hb	protein_coding
ENSMUSG00000028221	1720.92	1566.59	1875.25	-0.257223	0.061916	-4.11563	3.86126e-05	0.000397503	Tmem55a	protein_coding
ENSMUSG00000056899	101.011	130.811	71.2114	0.693071	0.154203	4.11461	3.87835e-05	0.000399046	Immp2l	protein_coding
ENSMUSG00000046182	2082.37	2289.59	1875.14	0.28279	0.0680062	4.11355	3.89616e-05	0.000400468	Gsg1l	protein_coding
ENSMUSG00000100801	2534.72	2129.31	2940.12	-0.443608	0.111742	-4.11354	3.89641e-05	0.000400468		processed_pseudogene
ENSMUSG00000031840	19788.3	21692.8	17883.8	0.280245	0.0681195	4.11253	3.91339e-05	0.000401776	Rab3a	protein_coding
ENSMUSG00000090112	3169.93	3443.43	2896.43	0.247668	0.0596895	4.11258	3.91258e-05	0.000401776	Shprh	protein_coding
ENSMUSG00000028291	2287.35	2080.09	2494.61	-0.245295	0.0579957	-4.11184	3.92511e-05	0.00040276	Akirin2	protein_coding
ENSMUSG00000006304	9091.39	8404.42	9778.36	-0.218185	0.0526893	-4.10943	3.96635e-05	0.000406551	Arpc2	protein_coding
ENSMUSG00000021395	5865.88	5403.19	6328.58	-0.230423	0.0558066	-4.10944	3.96619e-05	0.000406551	Spin1	protein_coding
ENSMUSG00000084898	407.349	340.749	473.95	-0.433444	0.101728	-4.1081	3.98931e-05	0.000408683		lincRNA
ENSMUSG00000007038	1681.76	1840.72	1522.8	0.265963	0.0637402	4.1074	4.00133e-05	0.000409692	Neu1	protein_coding
ENSMUSG00000020359	289.654	332.534	246.773	0.413359	0.101508	4.10694	4.00941e-05	0.000410297	Phykpl	protein_coding
ENSMUSG00000005610	46515.6	43081.4	49949.8	-0.216102	0.0523859	-4.10636	4.01936e-05	0.000411092	Eif4g2	protein_coding
ENSMUSG00000058690	7371.32	6814.12	7928.52	-0.225712	0.0550086	-4.10544	4.0354e-05	0.00041251	Ccser2	protein_coding
ENSMUSG00000027276	418.611	349.599	487.623	-0.435126	0.101687	-4.10427	4.05597e-05	0.000414388	Jag1	protein_coding
ENSMUSG00000033253	3075.48	3398.09	2752.87	0.300892	0.0728896	4.10332	4.07258e-05	0.000415861	Szt2	protein_coding
ENSMUSG00000022453	743.895	831.937	655.854	0.328707	0.0781621	4.10319	4.07493e-05	0.000415876	Naga	protein_coding
ENSMUSG00000036249	760.968	666.211	855.726	-0.354481	0.0871511	-4.1018	4.09956e-05	0.000418164	Rbm43	protein_coding
ENSMUSG00000035919	792.773	884.226	701.319	0.332414	0.0815233	4.10157	4.10357e-05	0.000418347	Bbs9	protein_coding
ENSMUSG00000046798	3159.19	3484.79	2833.58	0.283559	0.0674831	4.10036	4.12511e-05	0.000420317	Cldn12	protein_coding
ENSMUSG00000037362	10357.9	9190.92	11524.8	-0.310366	0.0738793	-4.09963	4.13819e-05	0.000421422	Nov	protein_coding
ENSMUSG00000022780	45.3868	61.188	29.5856	0.724962	0.177474	4.099	4.1494e-05	0.000422336	Meltf	protein_coding
ENSMUSG00000007613	1652.3	1455.33	1849.28	-0.340265	0.0828991	-4.09883	4.1525e-05	0.000422424	Tgfbr1	protein_coding
ENSMUSG00000097618	40.1993	24.663	55.7355	-0.734315	0.186188	-4.09839	4.16032e-05	0.000422992		lincRNA
ENSMUSG00000020733	1127.14	1005.12	1249.17	-0.297441	0.0707082	-4.09656	4.19326e-05	0.000426112	Slc9a3r1	protein_coding
ENSMUSG00000028011	91.6156	120.005	63.2263	0.701825	0.160955	4.09511	4.21959e-05	0.000428327	Tdo2	protein_coding
ENSMUSG00000029310	1932.67	2158.46	1706.88	0.320675	0.0763458	4.09512	4.21951e-05	0.000428327	Nudt9	protein_coding
ENSMUSG00000069670	3825.91	3504.34	4147.49	-0.239731	0.0579231	-4.0941	4.23814e-05	0.000429979	Nkain2	protein_coding
ENSMUSG00000029452	80.0586	103.273	56.8441	0.677185	0.156044	4.09397	4.24056e-05	0.000429994	Tmem116	protein_coding
ENSMUSG00000045259	137.515	169.484	105.545	0.581427	0.132275	4.09361	4.24708e-05	0.000430193	Klhdc9	protein_coding
ENSMUSG00000073792	632.357	717.08	547.633	0.364662	0.0858403	4.09372	4.24516e-05	0.000430193	Alg6	protein_coding
ENSMUSG00000021044	1619.07	1781.57	1456.56	0.277223	0.0661263	4.09326	4.25349e-05	0.000430612	Adck1	protein_coding
ENSMUSG00000001946	665.809	585.309	746.309	-0.334381	0.0796616	-4.09297	4.25882e-05	0.000430921	Esam	protein_coding
ENSMUSG00000015932	7335.78	6727.36	7944.2	-0.238767	0.0578565	-4.09176	4.2811e-05	0.000432944	Dstn	protein_coding
ENSMUSG00000069094	2032.16	1843.75	2220.56	-0.250093	0.0593735	-4.09097	4.29571e-05	0.000434188	Pde7a	protein_coding
ENSMUSG00000026201	2152.98	2374.1	1931.87	0.279808	0.0664529	4.08982	4.317e-05	0.000436107	Stk16	protein_coding
ENSMUSG00000029919	420.073	356.713	483.433	-0.409754	0.0975527	-4.08949	4.32326e-05	0.000436344	Hpgds	protein_coding
ENSMUSG00000038437	5265.93	5727.64	4804.22	0.252636	0.0612955	4.08933	4.32627e-05	0.000436344	Mllt6	protein_coding
ENSMUSG00000049804	4442.11	3839.68	5044.53	-0.364337	0.0857898	-4.08944	4.32407e-05	0.000436344	Armcx4	protein_coding
ENSMUSG00000030102	7282.09	8246.98	6317.2	0.372978	0.0915207	4.08793	4.35247e-05	0.000438752	Itpr1	protein_coding
ENSMUSG00000054008	7367.73	8044.27	6691.19	0.253023	0.0605829	4.08566	4.39511e-05	0.000442814	Ndst1	protein_coding
ENSMUSG00000022965	3858.13	3523.26	4192.99	-0.258105	0.0634666	-4.08418	4.42328e-05	0.000445415	Ifngr2	protein_coding
ENSMUSG00000032802	2221.32	2442.49	2000.14	0.279047	0.0672867	4.08317	4.44248e-05	0.00044711	Srxn1	protein_coding
ENSMUSG00000028041	3316.08	2982.71	3649.46	-0.278328	0.0667451	-4.08301	4.44555e-05	0.000447181	Adam15	protein_coding
ENSMUSG00000035621	2429.13	2113.1	2745.16	-0.347115	0.0814514	-4.08174	4.46999e-05	0.0004494	Midn	protein_coding
ENSMUSG00000042992	808.612	898.722	718.503	0.309661	0.0744085	4.08119	4.48057e-05	0.000450225	Borcs5	protein_coding
ENSMUSG00000051166	5823.14	6291.15	5355.12	0.247367	0.0614756	4.07702	4.56171e-05	0.000458134	Eml5	protein_coding
ENSMUSG00000068566	3401.69	2887.82	3915.56	-0.385439	0.0872487	-4.07625	4.57671e-05	0.000459397	Myadm	protein_coding
ENSMUSG00000041528	2257.48	2448.57	2066.39	0.247449	0.060474	4.07452	4.6109e-05	0.000462582	Rnf123	protein_coding
ENSMUSG00000004360	3960.73	3587.75	4333.7	-0.247701	0.0586434	-4.07345	4.63217e-05	0.00046447	9330159F19Rik	protein_coding
ENSMUSG00000020838	29.5988	15.6992	43.4984	-0.790416	0.192446	-4.07238	4.65359e-05	0.000466371	Slc6a4	protein_coding
ENSMUSG00000022416	5081.11	4614.46	5547.76	-0.242901	0.0576588	-4.07173	4.66656e-05	0.000467423	Cacna1i	protein_coding
ENSMUSG00000028295	833.598	959.212	707.984	0.403115	0.0952732	4.06937	4.71394e-05	0.000471919	Smim8	protein_coding
ENSMUSG00000038542	1468.33	1604.75	1331.9	0.25287	0.0603805	4.06824	4.73696e-05	0.000473972	Pcid2	protein_coding
ENSMUSG00000059323	309.798	258.499	361.097	-0.441891	0.107189	-4.06537	4.79554e-05	0.000479326	Vps28	protein_coding
ENSMUSG00000063063	8532.49	7934.39	9130.59	-0.200384	0.0488288	-4.06545	4.79408e-05	0.000479326	Ctnna2	protein_coding
ENSMUSG00000071753	431.167	364.199	498.135	-0.424055	0.103542	-4.06496	4.80406e-05	0.000479924	C230004F18Rik	processed_transcript
ENSMUSG00000036368	409.719	472.857	346.581	0.412045	0.0979762	4.06435	4.81671e-05	0.000480679	Rmdn2	protein_coding
ENSMUSG00000048222	327.349	388.771	265.926	0.49397	0.118925	4.06441	4.81541e-05	0.000480679	Mfap1b	protein_coding
ENSMUSG00000000326	1952.13	1737.01	2167.24	-0.306771	0.0739551	-4.06334	4.83764e-05	0.000482513	Comt	protein_coding
ENSMUSG00000034121	288.102	339.47	236.734	0.468366	0.109525	4.06301	4.84442e-05	0.000482934	Mks1	protein_coding
ENSMUSG00000042569	790.418	891.363	689.473	0.346306	0.0823486	4.0628	4.84884e-05	0.00048312	Dhrs7b	protein_coding
ENSMUSG00000020311	2248.47	2462.26	2034.69	0.264752	0.0638852	4.06192	4.86717e-05	0.000484692	Erlec1	protein_coding
ENSMUSG00000019785	1221.44	1091.24	1351.64	-0.293539	0.0703497	-4.0607	4.89263e-05	0.00048697	Clvs2	protein_coding
ENSMUSG00000042567	391.135	451.606	330.664	0.423948	0.105022	4.0596	4.91578e-05	0.000489016	Nek10	protein_coding
ENSMUSG00000030220	756.013	660.994	851.032	-0.345413	0.0826806	-4.05756	4.9589e-05	0.000493047	Arhgdib	protein_coding
ENSMUSG00000045467	40.2027	55.5861	24.8194	0.769345	0.182049	4.05669	4.97728e-05	0.000494614	Ttll13	protein_coding
ENSMUSG00000037824	1877.94	1699.71	2056.17	-0.258685	0.0621308	-4.05536	5.00575e-05	0.000497182	Tspan14	protein_coding
ENSMUSG00000004151	2764.84	2463.17	3066.51	-0.295348	0.0703667	-4.05451	5.02399e-05	0.000498731	Etv1	protein_coding
ENSMUSG00000115928	56.416	77.053	35.7789	0.784986	0.172541	4.05365	5.04257e-05	0.000500313
ENSMUSG00000045327	31.5371	45.6453	17.429	0.796874	0.189797	4.05272	5.0625e-05	0.000502027	6330549D23Rik	transcribed_processed_pseudogene
ENSMUSG00000043542	3579.34	3225.24	3933.44	-0.282952	0.0692574	-4.052	5.07815e-05	0.000503315	Zc2hc1a	protein_coding
ENSMUSG00000023764	639.353	738.781	539.926	0.418181	0.0992905	4.0517	5.08479e-05	0.000503708	Sfi1	protein_coding
ENSMUSG00000045328	305.909	254.051	357.767	-0.447346	0.10742	-4.05146	5.0899e-05	0.000503951	Cenpe	protein_coding
ENSMUSG00000020961	1326.06	1482.74	1169.39	0.333775	0.0815642	4.05078	5.10462e-05	0.000505144	Ston2	protein_coding
ENSMUSG00000000876	956.593	1065.72	847.466	0.312006	0.0747287	4.05063	5.10793e-05	0.000505206	Pxmp4	protein_coding
ENSMUSG00000027420	129.992	91.1929	168.791	-0.685687	0.160825	-4.0476	5.17444e-05	0.000511517	Bfsp1	protein_coding
ENSMUSG00000020527	730.089	636.236	823.942	-0.340258	0.0798388	-4.04748	5.17722e-05	0.000511525	Myo19	protein_coding
ENSMUSG00000028256	801.764	889.46	714.068	0.307456	0.074729	4.0468	5.19216e-05	0.000512465	Odf2l	protein_coding
ENSMUSG00000064125	1972.9	1677.08	2268.72	-0.388897	0.0899162	-4.04688	5.19052e-05	0.000512465	Prr36	protein_coding
ENSMUSG00000032285	1087.31	1207.71	966.911	0.308536	0.0748974	4.04489	5.23466e-05	0.00051639	Dnaja4	protein_coding
ENSMUSG00000014767	1579.18	1726.83	1431.53	0.257992	0.062315	4.04239	5.2909e-05	0.000521666	Tbp	protein_coding
ENSMUSG00000029189	4251.77	3857.59	4645.95	-0.269684	0.0664838	-4.04205	5.29848e-05	0.000522141	Sel1l3	protein_coding
ENSMUSG00000027752	770.22	683.967	856.474	-0.315973	0.0776376	-4.04082	5.32638e-05	0.000524616	Exosc8	protein_coding
ENSMUSG00000016481	849.894	765.674	934.113	-0.286533	0.0706449	-4.04063	5.33077e-05	0.000524776	Cr1l	protein_coding
ENSMUSG00000112803	12.0426	19.5843	4.5009	0.730767	0.18725	4.04025	5.33946e-05	0.000525357
ENSMUSG00000024766	292.972	345.59	240.354	0.473109	0.112597	4.03502	5.45971e-05	0.000536909	Lipo3	protein_coding
ENSMUSG00000032011	20183.4	18108.2	22258.6	-0.280965	0.0677763	-4.03424	5.47786e-05	0.000538415	Thy1	protein_coding
ENSMUSG00000070699	616.397	724.723	508.071	0.45916	0.107832	4.03391	5.48559e-05	0.000538894	Sars2	protein_coding
ENSMUSG00000022013	1615.95	1782.56	1449.33	0.287965	0.0701924	4.03263	5.51567e-05	0.000541286	Dnajc15	protein_coding
ENSMUSG00000022841	2595.24	2361.41	2829.07	-0.250387	0.0608687	-4.03269	5.51411e-05	0.000541286	Ap2m1	protein_coding
ENSMUSG00000028914	1225.61	1100.12	1351.09	-0.283404	0.0688109	-4.03159	5.54009e-05	0.000543401	Casp9	protein_coding
ENSMUSG00000020235	2425.48	2153.8	2697.17	-0.313113	0.0765474	-4.03074	5.56014e-05	0.000545084	Fzr1	protein_coding
ENSMUSG00000024544	1401.1	1265.24	1536.95	-0.288696	0.0723872	-4.02723	5.64368e-05	0.000552701	Ldlrad4	protein_coding
ENSMUSG00000036437	1094.98	978.311	1211.64	-0.300368	0.0734508	-4.02729	5.6423e-05	0.000552701	Npy1r	protein_coding
ENSMUSG00000046160	4258.12	3780.43	4735.81	-0.318024	0.0784106	-4.02486	5.70082e-05	0.000558007	Olig1	protein_coding
ENSMUSG00000037169	879.384	763.147	995.621	-0.363938	0.0890499	-4.0242	5.71694e-05	0.000559295	Mycn	protein_coding
ENSMUSG00000057375	1071.23	1180.03	962.429	0.284399	0.0695026	4.02403	5.72098e-05	0.000559401	Yipf1	protein_coding
ENSMUSG00000052581	1946.78	1776.24	2117.32	-0.250299	0.0615927	-4.02259	5.75613e-05	0.000562547	Lrrtm4	protein_coding
ENSMUSG00000026657	5474.74	4957.46	5992.02	-0.261899	0.0637933	-4.02164	5.77933e-05	0.000564523	Frmd4a	protein_coding
ENSMUSG00000045087	150.747	114.611	186.882	-0.594764	0.140611	-4.02045	5.80864e-05	0.000567092	S1pr5	protein_coding
ENSMUSG00000001288	313.954	259.415	368.493	-0.456397	0.110224	-4.01772	5.87642e-05	0.00057331	Rarg	protein_coding
ENSMUSG00000035877	3208.42	3511.52	2905.32	0.271243	0.0669854	4.01764	5.87839e-05	0.00057331	Zhx3	protein_coding
ENSMUSG00000086401	157.572	191.502	123.641	0.543053	0.129302	4.01723	5.88862e-05	0.000574011	Gm15559	processed_transcript
ENSMUSG00000087226	27.3738	40.7897	13.9579	0.825971	0.192053	4.01642	5.90901e-05	0.000575702	Gm14015	lincRNA
ENSMUSG00000027896	195.211	158.972	231.451	-0.485427	0.117069	-4.0148	5.94967e-05	0.000579215	Slc16a4	protein_coding
ENSMUSG00000033419	19119.6	17197.1	21042	-0.270474	0.0652182	-4.01474	5.9512e-05	0.000579215	Snap91	protein_coding
ENSMUSG00000029538	1754.73	1902.84	1606.62	0.251164	0.0628816	4.0138	5.97484e-05	0.000581203	Srsf9	protein_coding
ENSMUSG00000072966	4309.69	3799.58	4819.8	-0.324283	0.078726	-4.01369	5.97777e-05	0.000581203	Gprasp2	protein_coding
ENSMUSG00000003208	345.509	398.149	292.869	0.413595	0.100103	4.01354	5.9814e-05	0.000581257	Ccdc94	protein_coding
ENSMUSG00000022812	10563.3	9648.65	11477.9	-0.245062	0.0602555	-4.01267	6.00346e-05	0.000583101	Gsk3b	protein_coding
ENSMUSG00000028630	4590.49	4182.51	4998.47	-0.259771	0.064666	-4.01126	6.03948e-05	0.000586298	Dyrk2	protein_coding
ENSMUSG00000021820	10051.2	10910.5	9191.94	0.236615	0.0579154	4.00682	6.15416e-05	0.000597124	Camk2g	protein_coding
ENSMUSG00000012443	291.702	240.302	343.101	-0.467377	0.116738	-4.00641	6.16476e-05	0.000597331	Kif11	protein_coding
ENSMUSG00000021288	30280.3	27683.2	32877.5	-0.238705	0.0585235	-4.00646	6.16367e-05	0.000597331	Klc1	protein_coding
ENSMUSG00000028104	1034	1136.23	931.764	0.294272	0.0744338	4.00638	6.16577e-05	0.000597331	Polr3gl	protein_coding
ENSMUSG00000049866	3090.37	2778.23	3402.52	-0.281834	0.0690914	-4.00614	6.17194e-05	0.000597623	Arl4c	protein_coding
ENSMUSG00000034021	5683.86	5252.87	6114.84	-0.216746	0.0535514	-4.00563	6.18516e-05	0.00059834	Pds5b	protein_coding
ENSMUSG00000090258	232.092	280.397	183.787	0.529573	0.130227	4.00561	6.18569e-05	0.00059834	Churc1	protein_coding
ENSMUSG00000041957	255.694	314.59	196.799	0.568456	0.141871	4.00458	6.21281e-05	0.000600656	Pkp2	protein_coding
ENSMUSG00000113124	19.5575	30.5259	8.58921	0.811166	0.192745	4.00412	6.22477e-05	0.000601505
ENSMUSG00000002266	510.957	406.011	615.902	-0.524656	0.129981	-4.00133	6.29863e-05	0.00060802	Zim1	protein_coding
ENSMUSG00000030630	745.911	651.409	840.413	-0.34238	0.0824994	-4.00145	6.29545e-05	0.00060802	Fah	protein_coding
ENSMUSG00000023048	671.091	775.565	566.618	0.427665	0.110314	4.00074	6.31453e-05	0.000609244	Prr13	protein_coding
ENSMUSG00000025417	2969.01	3320.07	2617.96	0.330661	0.081792	3.9995	6.34754e-05	0.000612117	Pip4k2c	protein_coding
ENSMUSG00000068732	2552.93	2781.75	2324.1	0.250956	0.0616835	3.99911	6.35802e-05	0.000612815	Tmem167b	protein_coding
ENSMUSG00000024942	729.881	617.929	841.834	-0.410822	0.0991787	-3.99476	6.47596e-05	0.000623864	Capn1	protein_coding
ENSMUSG00000039646	249.792	288.834	210.75	0.423827	0.105188	3.99403	6.49608e-05	0.000625483	Vasn	protein_coding
ENSMUSG00000017686	4384.76	4744.56	4024.96	0.226793	0.0556925	3.99354	6.5094e-05	0.000625975	Rhot1	protein_coding
ENSMUSG00000019775	4890.24	4492.17	5288.31	-0.233487	0.057886	-3.99351	6.51015e-05	0.000625975	Rgs17	protein_coding
ENSMUSG00000038354	479.772	547.658	411.887	0.392454	0.0966734	3.99348	6.51112e-05	0.000625975	Ankrd35	protein_coding
ENSMUSG00000025738	20798.4	22826.6	18770.2	0.273661	0.0674838	3.99276	6.53097e-05	0.000627454	Fbxl16	protein_coding
ENSMUSG00000035686	545.873	631.98	459.766	0.418721	0.101313	3.99268	6.53314e-05	0.000627454	Thrsp	protein_coding
ENSMUSG00000020191	20.1865	30.1048	10.2682	0.745818	0.193064	3.99217	6.54722e-05	0.000628487	Spata48	protein_coding
ENSMUSG00000032244	8667.49	8080.55	9254.42	-0.19403	0.0481717	-3.99195	6.55311e-05	0.000628732	Fem1b	protein_coding
ENSMUSG00000025393	35065.6	31801	38330.2	-0.26281	0.0649283	-3.99176	6.55845e-05	0.000628926	Atp5b	protein_coding
ENSMUSG00000015488	2214.14	2407.78	2020.5	0.239645	0.0585174	3.99039	6.59656e-05	0.000632259	Cacfd1	protein_coding
ENSMUSG00000027349	1994.59	2157.41	1831.78	0.237605	0.0592213	3.98958	6.61904e-05	0.000634092	Fam98b	protein_coding
ENSMUSG00000026344	5944.44	5288.21	6600.67	-0.321375	0.0814285	-3.9892	6.62978e-05	0.0006348	Lypd1	protein_coding
ENSMUSG00000074064	841.537	941.567	741.507	0.317462	0.0763042	3.98873	6.64286e-05	0.00063573	Mlycd	protein_coding
ENSMUSG00000020900	11118.6	9791.82	12445.5	-0.31531	0.0754595	-3.98825	6.65625e-05	0.000636689	Myh10	protein_coding
ENSMUSG00000046204	2969.1	2616.62	3321.57	-0.334721	0.0833953	-3.98776	6.66996e-05	0.000637678	Pnma2	protein_coding
ENSMUSG00000045903	760.366	875.949	644.782	0.415333	0.10376	3.98606	6.71806e-05	0.000641952	Npas4	protein_coding
ENSMUSG00000005262	2980.15	3203.76	2756.53	0.220696	0.0552555	3.98435	6.76639e-05	0.000646243	Ufd1	protein_coding
ENSMUSG00000037287	3196.23	3449.26	2943.21	0.221241	0.0546481	3.98351	6.79047e-05	0.000648216	Tbcel	protein_coding
ENSMUSG00000040055	1075.23	1223.58	926.873	0.370932	0.0896982	3.98269	6.81402e-05	0.000650135	Gjb6	protein_coding
ENSMUSG00000035086	5454.11	5902.82	5005.39	0.232356	0.0575763	3.98131	6.85354e-05	0.000653576	Becn1	protein_coding
ENSMUSG00000109714	409.791	343.802	475.781	-0.427452	0.1021	-3.98054	6.87575e-05	0.000655363
ENSMUSG00000089857	335.681	284.264	387.099	-0.415139	0.104115	-3.97998	6.89202e-05	0.000656583	Zfp882	protein_coding
ENSMUSG00000020936	5978.28	6446.45	5510.11	0.223538	0.0556248	3.97876	6.9275e-05	0.000659631	Nmt1	protein_coding
ENSMUSG00000042444	3626.46	3317.23	3935.69	-0.245078	0.0610787	-3.97576	7.01555e-05	0.000667679	Mindy2	protein_coding
ENSMUSG00000025207	3154.16	2788.71	3519.61	-0.32728	0.0818813	-3.9752	7.03202e-05	0.000668909	Sema4g	protein_coding
ENSMUSG00000020719	24264	22432.3	26095.6	-0.198226	0.0485393	-3.975	7.03799e-05	0.00066914	Ddx5	protein_coding
ENSMUSG00000076441	106.415	75.8908	136.94	-0.662058	0.159618	-3.97466	7.048e-05	0.000669755	Ass1	protein_coding
ENSMUSG00000032698	802.655	712.992	892.318	-0.311503	0.0770015	-3.97398	7.06809e-05	0.000671326	Lmo2	protein_coding
ENSMUSG00000009013	5029.21	4417.05	5641.38	-0.336511	0.0830106	-3.97306	7.09565e-05	0.000673268	Dynll1	protein_coding
ENSMUSG00000025885	4021.99	4402.75	3641.24	0.262849	0.064751	3.9731	7.09433e-05	0.000673268	Myo5b	protein_coding
ENSMUSG00000022525	733.643	832.718	634.568	0.36551	0.0894851	3.97276	7.10448e-05	0.000673429	Hrasls	protein_coding
ENSMUSG00000025026	5591.14	5172.15	6010.14	-0.209403	0.0519139	-3.97283	7.10228e-05	0.000673429	Add3	protein_coding
ENSMUSG00000109130	202.834	244.453	161.216	0.523229	0.120366	3.97241	7.11497e-05	0.000674085
ENSMUSG00000035944	229.257	268.989	189.525	0.458352	0.117195	3.97213	7.12343e-05	0.000674549	Ttc38	protein_coding
ENSMUSG00000002733	1248.34	1375.2	1121.49	0.285809	0.0710312	3.97188	7.13062e-05	0.000674891	Plekha3	protein_coding
ENSMUSG00000059552	591.18	510.756	671.605	-0.364059	0.0875803	-3.97163	7.13822e-05	0.000675272	Trp53	protein_coding
ENSMUSG00000041064	66.8019	45.1822	88.4217	-0.720037	0.16818	-3.9709	7.1603e-05	0.000677023	Pif1	protein_coding
[truncated: 3,091 more rows]

## Sheet: B-Significant striatum
X	baseMean	MUT.Mean	CTRL.Mean	log2FoldChange	lfcSE	stat	pvalue	padj	symbol	biotype
ENSMUSG00000073779	230.068	390.097	70.0381	2.17293	0.140884	14.0461	8.14011e-45	1.44471e-40		antisense
ENSMUSG00000022044	8596.72	6219.1	10974.3	-0.837399	0.0602001	-13.5	1.56478e-41	1.38858e-37	Stmn4	protein_coding
ENSMUSG00000024501	16149.7	9630.65	22668.7	-1.18934	0.0867885	-12.8528	8.29332e-38	4.90633e-34	Dpysl3	protein_coding
ENSMUSG00000001525	27028.9	16750.5	37307.4	-1.12593	0.0860382	-12.3534	4.67233e-35	2.07311e-31	Tubb5	protein_coding
ENSMUSG00000097451	38784.7	26709.9	50859.4	-0.928793	0.0745197	-11.9097	1.05386e-32	3.7408e-29		processed_transcript
ENSMUSG00000027500	35596.4	24464.3	46728.4	-0.945601	0.077	-11.7692	5.62264e-32	1.66318e-28	Stmn2	protein_coding
ENSMUSG00000047261	22136.7	16633.4	27640	-0.728737	0.0604382	-11.6438	2.4681e-31	6.2577e-28	Gap43	protein_coding
ENSMUSG00000074264	2920.5	3814.52	2026.49	0.888832	0.0750645	11.2328	2.81449e-29	6.24394e-26	Amy1	protein_coding
ENSMUSG00000024769	537.936	729.41	346.461	1.03407	0.0884392	10.9797	4.7868e-28	9.43956e-25	Cdc42bpg	protein_coding
ENSMUSG00000079523	2327.6	1551.48	3103.72	-1.02205	0.0897147	-10.9449	7.03104e-28	1.24787e-24	Tmsb10	protein_coding
ENSMUSG00000019027	737.051	1026.74	447.357	1.12898	0.0967122	10.788	3.92247e-27	6.32872e-24	Dnah1	protein_coding
ENSMUSG00000060600	472.991	639.225	306.756	1.03846	0.0920242	10.678	1.2896e-26	1.90732e-23	Eno3	protein_coding
ENSMUSG00000097545	6475.58	5091.73	7859.42	-0.68833	0.0659858	-10.2268	1.50342e-24	1.9059e-21	Mir124a-1hg	lincRNA
ENSMUSG00000005682	2086.16	2570.41	1601.91	0.668137	0.0628256	10.2313	1.43582e-24	1.9059e-21	Pan2	protein_coding
ENSMUSG00000021196	18770.8	13722	23819.6	-0.813286	0.0779937	-10.0452	9.64053e-24	1.14067e-20	Pfkp	protein_coding
ENSMUSG00000062380	17174.8	11466.7	22882.9	-0.976907	0.0920857	-10.0375	1.04245e-23	1.15634e-20	Tubb3	protein_coding
ENSMUSG00000032024	1928.52	1420.1	2436.94	-0.781132	0.0748834	-9.99486	1.60513e-23	1.67575e-20	Clmp	protein_coding
ENSMUSG00000097391	1424.45	1027.16	1821.74	-0.831106	0.0801498	-9.93125	3.04415e-23	3.00153e-20	Mirg	lincRNA
ENSMUSG00000073433	2463.34	1617.66	3309.03	-1.03424	0.099575	-9.90211	4.07599e-23	3.80741e-20	Arhgdig	protein_coding
ENSMUSG00000022658	4630.57	3606.62	5654.52	-0.654078	0.0639242	-9.88749	4.71693e-23	4.18581e-20	Tagln3	protein_coding
ENSMUSG00000048920	2413.91	2934.27	1893.56	0.649139	0.0639398	9.85245	6.68942e-23	5.65352e-20	Fkrp	protein_coding
ENSMUSG00000025950	4571.5	3574.34	5568.65	-0.669518	0.0668403	-9.73635	2.10996e-22	1.70216e-19	Idh1	protein_coding
ENSMUSG00000093930	27415.5	20479.3	34351.8	-0.744472	0.073678	-9.67747	3.75895e-22	2.9006e-19	Hmgcs1	protein_coding
ENSMUSG00000070348	2263	1735.1	2790.91	-0.657184	0.0652572	-9.61837	6.68843e-22	4.94609e-19	Ccnd1	protein_coding
ENSMUSG00000019370	56253.7	46405.7	66101.7	-0.541429	0.0551838	-9.60663	7.4959e-22	5.32149e-19	Calm3	protein_coding
ENSMUSG00000027397	4714.55	3744.43	5684.67	-0.605238	0.0611695	-9.57618	1.00705e-21	6.87428e-19	Slc20a1	protein_coding
ENSMUSG00000024186	1762.7	1289.61	2235.79	-0.855121	0.0886373	-9.46522	2.92941e-21	1.9256e-18	Rgs11	protein_coding
ENSMUSG00000036246	911.867	679.403	1144.33	-0.759107	0.0771613	-9.44915	3.41595e-21	2.16522e-18	Gmip	protein_coding
ENSMUSG00000033854	946.795	698.211	1195.38	-0.765983	0.0773754	-9.44106	3.69039e-21	2.25852e-18	Kcnk10	protein_coding
ENSMUSG00000035279	294.072	404.333	183.81	1.07324	0.105603	9.41827	4.58596e-21	2.71306e-18	Ssc5d	protein_coding
ENSMUSG00000085586	208.648	298.852	118.443	1.24555	0.124146	9.35914	8.03856e-21	4.6022e-18		processed_transcript
ENSMUSG00000067931	946.444	674.051	1218.84	-0.843156	0.08549	-9.33573	1.00299e-20	5.56282e-18	Zfp948	protein_coding
ENSMUSG00000027009	862.518	576.06	1148.98	-0.929732	0.0921629	-9.32052	1.15768e-20	6.18829e-18	Itga4	protein_coding
ENSMUSG00000109122	658.14	483.848	832.432	-0.825467	0.0861628	-9.318	1.1855e-20	6.18829e-18
ENSMUSG00000000489	907.654	606.847	1208.46	-0.938925	0.0943348	-9.2423	2.41248e-20	1.22334e-17	Pdgfb	protein_coding
ENSMUSG00000007682	3202.89	2391.42	4014.35	-0.803061	0.0850502	-9.21981	2.97628e-20	1.46731e-17	Dio2	protein_coding
ENSMUSG00000026688	2953.64	2290.78	3616.49	-0.713436	0.0759467	-9.18168	4.24417e-20	2.01463e-17	Mgst3	protein_coding
ENSMUSG00000031604	4168.63	3243.35	5093.91	-0.658163	0.0690177	-9.17994	4.3135e-20	2.01463e-17	Msmo1	protein_coding
ENSMUSG00000038065	7162.36	4924.61	9400.12	-0.92293	0.0947939	-9.17107	4.68357e-20	2.08122e-17	Mturn	protein_coding
ENSMUSG00000041649	516.196	357.563	674.828	-0.874227	0.0891975	-9.17091	4.6906e-20	2.08122e-17	Klf8	protein_coding
ENSMUSG00000029032	172.17	253.604	90.7361	1.33352	0.134137	9.14788	5.80639e-20	2.51346e-17	Arhgef16	protein_coding
ENSMUSG00000004933	5536.73	4028.32	7045.13	-0.817028	0.0859365	-9.07771	1.10885e-19	4.68569e-17	Matk	protein_coding
ENSMUSG00000031328	7764.2	5652.83	9875.57	-0.849608	0.0918816	-9.01061	2.04909e-19	8.3826e-17	Flna	protein_coding
ENSMUSG00000001986	5028.1	3952.3	6103.9	-0.587246	0.0621526	-9.00907	2.07817e-19	8.3826e-17	Gria3	protein_coding
ENSMUSG00000003872	801.752	549.39	1054.11	-0.938217	0.0993689	-8.97706	2.78088e-19	1.07445e-16	Lin7b	protein_coding
ENSMUSG00000028832	1095.27	828.224	1362.32	-0.732905	0.0785373	-8.97691	2.7848e-19	1.07445e-16	Stmn1	protein_coding
ENSMUSG00000021301	3824.45	2882.34	4766.55	-0.712447	0.0759245	-8.92111	4.61635e-19	1.74321e-16	Hecw1	protein_coding
ENSMUSG00000020635	1666.62	1310.07	2023.16	-0.658785	0.0719213	-8.89265	5.96671e-19	2.20619e-16	Fkbp1b	protein_coding
ENSMUSG00000071658	6447.94	5058.18	7837.69	-0.63644	0.0692108	-8.85498	8.37022e-19	3.03173e-16	Gng3	protein_coding
ENSMUSG00000015942	1002.9	1245.91	759.886	0.708072	0.0765088	8.84185	9.4149e-19	3.34191e-16	Gtf2ird2	protein_coding
ENSMUSG00000026278	594.632	398.605	790.659	-1.01717	0.112363	-8.8315	1.03279e-18	3.5941e-16	Bok	protein_coding
ENSMUSG00000021913	3115.24	3810.5	2419.99	0.6802	0.0748868	8.80435	1.3161e-18	4.49195e-16	Ogdhl	protein_coding
ENSMUSG00000020953	996.399	725.124	1267.67	-0.764052	0.0813585	-8.79113	1.48064e-18	4.95818e-16	Coch	protein_coding
ENSMUSG00000035246	3257.95	2578.16	3937.74	-0.571097	0.0621366	-8.76124	1.93121e-18	6.34723e-16	Pcyt1b	protein_coding
ENSMUSG00000021273	2220.42	1732.68	2708.17	-0.639586	0.0700546	-8.74953	2.14244e-18	6.91346e-16	Fdft1	protein_coding
ENSMUSG00000021303	6407.63	4739.33	8075.94	-0.74726	0.080836	-8.72251	2.7209e-18	8.62332e-16	Gng4	protein_coding
ENSMUSG00000045136	9401.9	6833.61	11970.2	-0.795221	0.0865283	-8.69086	3.59712e-18	1.12003e-15	Tubb2b	protein_coding
ENSMUSG00000044847	5263.14	3839.59	6686.68	-0.801908	0.0878213	-8.68444	3.80601e-18	1.16464e-15	Lsm11	protein_coding
ENSMUSG00000021066	3904.58	3191.27	4617.88	-0.540251	0.0604254	-8.6682	4.39002e-18	1.32058e-15	Atl1	protein_coding
ENSMUSG00000067242	2671.08	2044.81	3297.35	-0.675063	0.0742146	-8.64581	5.34257e-18	1.58033e-15	Lgi1	protein_coding
ENSMUSG00000026407	159.478	228.365	90.5914	1.21928	0.131533	8.58522	9.06612e-18	2.6378e-15	Cacna1s	protein_coding
ENSMUSG00000111465	84.6225	133.522	35.7235	1.55537	0.165644	8.57195	1.01745e-17	2.91253e-15
ENSMUSG00000031647	2473.94	1978.54	2969.34	-0.609921	0.0690565	-8.56151	1.11403e-17	3.13839e-15	Mfap3l	protein_coding
ENSMUSG00000030782	577.795	413.379	742.211	-0.830254	0.0926878	-8.49463	1.98569e-17	5.50656e-15	Tgfb1i1	protein_coding
ENSMUSG00000027394	3333.64	2455.19	4212.09	-0.76259	0.0852166	-8.45602	2.76662e-17	7.55416e-15	Ttl	protein_coding
ENSMUSG00000027581	18846.8	15075.5	22618.2	-0.61204	0.0703702	-8.4303	3.44782e-17	9.27149e-15	Stmn3	protein_coding
ENSMUSG00000037071	7047.49	5607.11	8487.86	-0.578314	0.0662055	-8.34525	7.10651e-17	1.88248e-14	Scd1	protein_coding
ENSMUSG00000032186	30104.5	24755	35454	-0.496281	0.0574115	-8.31697	9.02429e-17	2.35534e-14	Tmod2	protein_coding
ENSMUSG00000031799	1516.3	1251.82	1780.78	-0.540477	0.0637523	-8.28365	1.19455e-16	3.07259e-14	Tpm4	protein_coding
ENSMUSG00000021448	1678.26	1297.38	2059.13	-0.653771	0.075185	-8.27102	1.32823e-16	3.36763e-14	Shc3	protein_coding
ENSMUSG00000036036	2221.28	1729.64	2712.91	-0.683856	0.0802319	-8.25382	1.53416e-16	3.83498e-14	Zfp57	protein_coding
ENSMUSG00000018965	12629.7	10505.4	14754.1	-0.482433	0.0566854	-8.23485	1.79785e-16	4.4317e-14	Ywhah	protein_coding
ENSMUSG00000031137	7325.93	5581.47	9070.39	-0.677206	0.0778491	-8.2032	2.34068e-16	5.69074e-14	Fgf13	protein_coding
ENSMUSG00000024646	2374.7	1996.77	2752.62	-0.520939	0.0626368	-8.19994	2.40507e-16	5.76826e-14	Cyb5a	protein_coding
ENSMUSG00000030729	20148.7	15684.2	24613.2	-0.611287	0.0705698	-8.16865	3.11862e-16	7.37991e-14	Pgm2l1	protein_coding
ENSMUSG00000029212	7320.69	5679.87	8961.51	-0.611806	0.0706017	-8.15035	3.62867e-16	8.47389e-14	Gabrb1	protein_coding
ENSMUSG00000024378	2106.22	1686.49	2525.94	-0.574815	0.0676403	-8.14259	3.86911e-16	8.91804e-14	Stard4	protein_coding
ENSMUSG00000031983	5747.57	6690.98	4804.16	0.511552	0.061584	8.12407	4.50795e-16	1.02573e-13	2310022B05Rik	protein_coding
ENSMUSG00000025986	5463.42	4566.72	6360.12	-0.47359	0.0564893	-8.12111	4.61925e-16	1.03775e-13	Slc39a10	protein_coding
ENSMUSG00000033022	2206.88	1703.45	2710.3	-0.680546	0.0807411	-8.0775	6.61102e-16	1.46666e-13	Cdo1	protein_coding
ENSMUSG00000072235	12473.9	9047.08	15900.7	-0.780871	0.0903522	-8.05942	7.66565e-16	1.67963e-13	Tuba1a	protein_coding
ENSMUSG00000031349	1705.98	1296.73	2115.22	-0.694031	0.0821563	-8.01829	1.07229e-15	2.32084e-13	Nsdhl	protein_coding
ENSMUSG00000029223	17506.5	14141.3	20871.6	-0.56114	0.0673913	-8.00327	1.21161e-15	2.59079e-13	Uchl1	protein_coding
ENSMUSG00000024981	1676.55	1327.5	2025.6	-0.633276	0.0767454	-7.98922	1.3579e-15	2.86906e-13	Acsl5	protein_coding
ENSMUSG00000027981	3730.08	4570.53	2889.63	0.634725	0.0752555	7.96647	1.63277e-15	3.40923e-13	Rnpc3	protein_coding
ENSMUSG00000098912	1529.65	1217.21	1842.09	-0.576529	0.0690737	-7.95199	1.83534e-15	3.78764e-13		processed_transcript
ENSMUSG00000075318	14010.3	11424.8	16595.8	-0.511554	0.0617605	-7.91641	2.4447e-15	4.98719e-13	Scn2a	protein_coding
ENSMUSG00000028197	733.359	533.91	932.808	-0.811128	0.0986139	-7.90827	2.60987e-15	5.26364e-13	Col24a1	protein_coding
ENSMUSG00000036469	2247.01	1608.4	2885.62	-0.818895	0.0969075	-7.89426	2.92049e-15	5.82393e-13	March1	protein_coding
ENSMUSG00000062151	5768.5	4180.99	7356.01	-0.791827	0.0949144	-7.84136	4.45676e-15	8.78873e-13	Unc13c	protein_coding
ENSMUSG00000049148	430.628	297.352	563.904	-0.895489	0.107204	-7.83295	4.76553e-15	9.29436e-13	Plcxd3	protein_coding
ENSMUSG00000049281	8624.22	7064.33	10184.1	-0.507949	0.0621371	-7.83083	4.84659e-15	9.3497e-13	Scn3b	protein_coding
ENSMUSG00000032249	5075.54	4025.18	6125.9	-0.589961	0.0717452	-7.82841	4.94065e-15	9.42867e-13	Anp32a	protein_coding
ENSMUSG00000058420	1756.79	1287.65	2225.94	-0.722917	0.0850272	-7.82529	5.06503e-15	9.5632e-13	Syt17	protein_coding
ENSMUSG00000020484	2879.63	2340.3	3418.95	-0.544071	0.0668308	-7.82215	5.19292e-15	9.70146e-13	Xbp1	protein_coding
ENSMUSG00000033961	929.611	1139.2	720.024	0.653805	0.0796637	7.80503	5.94853e-15	1.09973e-12	Zfp446	protein_coding
ENSMUSG00000110710	1169.85	909.246	1430.45	-0.667198	0.0824467	-7.76983	7.85904e-15	1.43796e-12
ENSMUSG00000074227	1146.02	1426.96	865.092	0.660473	0.0788915	7.76078	8.44101e-15	1.52868e-12	Spint2	protein_coding
ENSMUSG00000073418	340.329	449.546	231.113	0.910854	0.109899	7.7589	8.56675e-15	1.53578e-12	C4b	protein_coding
ENSMUSG00000036067	917.792	674.264	1161.32	-0.757381	0.0918268	-7.74757	9.36681e-15	1.66242e-12	Slc2a6	protein_coding
ENSMUSG00000025485	2267.76	1866.09	2669.42	-0.542223	0.0680178	-7.74389	9.64175e-15	1.69428e-12	Ric8a	protein_coding
ENSMUSG00000042105	23188.6	18356	28021.1	-0.601011	0.0739773	-7.74103	9.86115e-15	1.71584e-12	Inpp5f	protein_coding
ENSMUSG00000029231	7153.55	5920.99	8386.11	-0.484895	0.0603312	-7.72612	1.10874e-14	1.91047e-12	Pdgfra	protein_coding
ENSMUSG00000019894	3473.17	2763.36	4182.98	-0.597543	0.0739974	-7.71762	1.1852e-14	2.0226e-12	Slc6a15	protein_coding
ENSMUSG00000022351	5086.91	4025.42	6148.4	-0.584675	0.0718483	-7.71324	1.22663e-14	2.07336e-12	Sqle	protein_coding
ENSMUSG00000041959	756.673	469.71	1043.64	-1.08676	0.134543	-7.68652	1.51186e-14	2.53136e-12	S100a10	protein_coding
ENSMUSG00000027533	3987.92	3257.18	4718.66	-0.566946	0.0718665	-7.66872	1.73727e-14	2.88159e-12	Fabp5	protein_coding
ENSMUSG00000053192	18335.1	14519.3	22150.8	-0.618561	0.0774155	-7.64904	2.02478e-14	3.32739e-12	Mllt11	protein_coding
ENSMUSG00000008859	5484.85	4590.96	6378.75	-0.497686	0.0634135	-7.63437	2.26921e-14	3.69485e-12	Rala	protein_coding
ENSMUSG00000026163	6442.6	5315.26	7569.95	-0.518416	0.0656849	-7.62226	2.49265e-14	4.02178e-12	Sphkap	protein_coding
ENSMUSG00000020604	482.168	616.203	348.133	0.764415	0.0926278	7.61734	2.58954e-14	4.14046e-12	Arsg	protein_coding
ENSMUSG00000002343	1144.7	923.758	1365.65	-0.565361	0.0713557	-7.61071	2.72584e-14	4.31948e-12	Armc6	protein_coding
ENSMUSG00000102252	17014.7	14107.9	19921.5	-0.487786	0.0618076	-7.59534	3.06988e-14	4.82161e-12	Snrpn	protein_coding
ENSMUSG00000024325	1466.21	1805.62	1126.81	0.660651	0.0820707	7.59318	3.12141e-14	4.85954e-12	Ring1	protein_coding
ENSMUSG00000032026	2086.78	1764.38	2409.19	-0.466113	0.0599307	-7.57643	3.55202e-14	5.48186e-12	Rexo2	protein_coding
ENSMUSG00000046699	2013.2	1543.28	2483.11	-0.677706	0.0850454	-7.54108	4.661e-14	7.13133e-12	Slitrk4	protein_coding
ENSMUSG00000000056	2964.25	2469.75	3458.76	-0.483725	0.061955	-7.53358	4.93675e-14	7.48867e-12	Narf	protein_coding
ENSMUSG00000040536	5333.42	4346.31	6320.53	-0.521529	0.0661603	-7.52432	5.29947e-14	7.97076e-12	Necab1	protein_coding
ENSMUSG00000041624	419.866	318.583	521.149	-0.746859	0.097115	-7.50493	6.14607e-14	9.16643e-12	Gucy1a2	protein_coding
ENSMUSG00000007655	1091.99	858.265	1325.72	-0.622377	0.079296	-7.49638	6.56062e-14	9.70316e-12	Cav1	protein_coding
ENSMUSG00000098061	220.82	138.344	303.296	-1.02905	0.12525	-7.49245	6.76018e-14	9.91568e-12		lincRNA
ENSMUSG00000032572	289.599	390.249	188.949	1.02284	0.136322	7.48771	7.00832e-14	1.01954e-11	Col6a4	protein_coding
ENSMUSG00000020193	439.254	580.4	298.108	0.891579	0.109704	7.4795	7.46083e-14	1.07654e-11	Zpbp	protein_coding
ENSMUSG00000019785	1083.51	873.145	1293.87	-0.575418	0.0739612	-7.47836	7.52549e-14	1.07712e-11	Clvs2	protein_coding
ENSMUSG00000041625	638.217	807.512	468.922	0.738637	0.0918274	7.46209	8.51623e-14	1.20917e-11	Ggact	protein_coding
ENSMUSG00000035545	20907.5	24643.2	17171.9	0.48161	0.0614211	7.45486	8.99622e-14	1.26718e-11	Leng8	protein_coding
ENSMUSG00000021814	1791.83	1412.3	2171.36	-0.606465	0.0772504	-7.44496	9.69721e-14	1.35517e-11	Anxa7	protein_coding
ENSMUSG00000068290	2634.06	3078.59	2189.52	0.481996	0.0624317	7.42587	1.12044e-13	1.55357e-11	Ddrgk1	protein_coding
ENSMUSG00000097767	23150.4	18333.7	27967	-0.644622	0.0842395	-7.42098	1.16258e-13	1.5995e-11	Miat	lincRNA
ENSMUSG00000000805	1027.08	804.982	1249.17	-0.623096	0.0798415	-7.41548	1.21186e-13	1.65446e-11	Car4	protein_coding
ENSMUSG00000005871	43420.1	33760.1	53080	-0.659467	0.0849361	-7.39997	1.3621e-13	1.84539e-11	Apc	protein_coding
ENSMUSG00000029580	19022.2	14702.6	23341.9	-0.6382	0.0813997	-7.36598	1.75848e-13	2.35509e-11	Actb	protein_coding
ENSMUSG00000092035	11495.8	13510.6	9481	0.560034	0.0747255	7.3655	1.76486e-13	2.35509e-11	Peg10	protein_coding
ENSMUSG00000035847	21419.1	18007.6	24830.5	-0.437228	0.0571028	-7.34853	2.00402e-13	2.65428e-11	Ids	protein_coding
ENSMUSG00000111837	351.522	258.499	444.545	-0.771744	0.100428	-7.32222	2.43906e-13	3.15973e-11
ENSMUSG00000059796	2411.12	1912.74	2909.5	-0.622514	0.0817898	-7.3234	2.41773e-13	3.15973e-11	Eif4a1	protein_coding
ENSMUSG00000020003	2178.43	2570.52	1786.33	0.497887	0.0648079	7.32268	2.43062e-13	3.15973e-11	Pex7	protein_coding
ENSMUSG00000030652	1055.65	1268.25	843.045	0.596058	0.0781188	7.31872	2.50355e-13	3.21978e-11	Coq7	protein_coding
ENSMUSG00000029625	2409.03	2899.96	1918.1	0.551028	0.0708887	7.29966	2.88496e-13	3.68361e-11	Cpsf4	protein_coding
ENSMUSG00000078185	1556.89	1192.48	1921.29	-0.685233	0.0892411	-7.28664	3.17778e-13	4.02851e-11	Chml	protein_coding
ENSMUSG00000031789	242.973	350.208	135.738	1.1786	0.150162	7.27278	3.52166e-13	4.43279e-11	Cngb1	protein_coding
ENSMUSG00000038943	396.6	287.373	505.826	-0.771441	0.0986401	-7.27102	3.56789e-13	4.45936e-11	Prc1	protein_coding
ENSMUSG00000073411	1367.26	1640.66	1093.86	0.58803	0.0776562	7.26292	3.78824e-13	4.70166e-11	H2-D1	protein_coding
ENSMUSG00000057715	2324.46	1749.34	2899.58	-0.70676	0.0910346	-7.25935	3.88941e-13	4.79369e-11	A830018L16Rik	protein_coding
ENSMUSG00000050321	2934.99	2037.35	3832.63	-0.868207	0.11137	-7.25197	4.1076e-13	5.02771e-11	Neto1	protein_coding
ENSMUSG00000018507	730.312	539.656	920.968	-0.73097	0.093968	-7.24429	4.34705e-13	5.28434e-11	Trpv2	protein_coding
ENSMUSG00000013833	1886.28	2278.16	1494.4	0.603524	0.0794518	7.24147	4.43843e-13	5.35873e-11	Med16	protein_coding
ENSMUSG00000033880	392.195	493.269	291.121	0.755274	0.09941	7.23894	4.5221e-13	5.40882e-11	Lgals3bp	protein_coding
ENSMUSG00000031980	3813.4	5101.48	2525.31	0.927356	0.117056	7.23838	4.54087e-13	5.40882e-11	Agt	protein_coding
ENSMUSG00000075316	1263.92	913.802	1614.04	-0.773767	0.0986975	-7.23453	4.67146e-13	5.52727e-11	Scn9a	protein_coding
ENSMUSG00000067879	6522.31	4956.29	8088.33	-0.705204	0.0922662	-7.23257	4.73921e-13	5.5703e-11	3110035E14Rik	protein_coding
ENSMUSG00000055078	4010.57	2956.92	5064.23	-0.772757	0.101032	-7.22787	4.90625e-13	5.72869e-11	Gabra5	protein_coding
ENSMUSG00000074899	218.023	303.64	132.406	1.06051	0.130809	7.2265	4.95618e-13	5.74917e-11	Sptbn5	protein_coding
ENSMUSG00000032575	1766.41	1479.21	2053.61	-0.520841	0.070836	-7.21775	5.28565e-13	6.09154e-11	Manf	protein_coding
ENSMUSG00000035311	5624.62	4792.9	6456.34	-0.442484	0.0597462	-7.20743	5.70164e-13	6.5131e-11	Gnptab	protein_coding
ENSMUSG00000025505	1003.03	1203.34	802.712	0.585421	0.077648	7.20688	5.72483e-13	6.5131e-11	Tmem80	protein_coding
ENSMUSG00000028004	582.142	367.542	796.741	-0.998858	0.123368	-7.18752	6.59809e-13	7.45878e-11	Npy2r	protein_coding
ENSMUSG00000022159	2347.35	2776.26	1918.44	0.558495	0.0759408	7.13777	9.48581e-13	1.06553e-10	Rab2b	protein_coding
ENSMUSG00000018012	2293.85	1726.24	2861.47	-0.750481	0.101696	-7.13391	9.75588e-13	1.08898e-10	Rac3	protein_coding
ENSMUSG00000041362	3916.05	3281.49	4550.61	-0.477287	0.0647982	-7.11114	1.15086e-12	1.27659e-10	Shtn1	protein_coding
ENSMUSG00000033392	19200.7	16543.1	21858.3	-0.418253	0.0574962	-7.09761	1.26931e-12	1.39924e-10	Clasp2	protein_coding
ENSMUSG00000052446	698.726	545.067	852.385	-0.636059	0.0851504	-7.07812	1.46122e-12	1.60085e-10	Zfp961	protein_coding
ENSMUSG00000030091	2417.86	2848.69	1987.03	0.525699	0.0721101	7.01852	2.24236e-12	2.44156e-10	Nup210	protein_coding
ENSMUSG00000037600	33.6076	58.3535	8.86162	1.6562	0.202941	7.01209	2.34779e-12	2.54077e-10	Kdf1	protein_coding
ENSMUSG00000036437	757.862	528.306	987.418	-0.857503	0.113737	-6.99669	2.62089e-12	2.81913e-10	Npy1r	protein_coding
ENSMUSG00000034349	893.995	718.503	1069.49	-0.555814	0.0754099	-6.99228	2.70447e-12	2.8915e-10	Smc4	protein_coding
ENSMUSG00000047989	1662.03	1988.1	1335.96	0.553967	0.0752576	6.97533	3.05161e-12	3.24312e-10	Ino80c	protein_coding
ENSMUSG00000053025	7872.27	5750.96	9993.58	-0.749908	0.0987039	-6.97242	3.11539e-12	3.29119e-10	Sv2b	protein_coding
ENSMUSG00000040640	8109.3	6526.03	9692.58	-0.550268	0.0747168	-6.96239	3.34546e-12	3.51333e-10	Erc2	protein_coding
ENSMUSG00000058672	17082.5	14028.4	20136.6	-0.481307	0.0654165	-6.95877	3.43248e-12	3.5835e-10	Tubb2a	protein_coding
ENSMUSG00000005674	1933.89	1518.73	2349.05	-0.630828	0.0862806	-6.95563	3.50986e-12	3.62933e-10	Tomm40l	protein_coding
ENSMUSG00000026028	7506.43	6271.86	8741	-0.464163	0.0639193	-6.95533	3.51727e-12	3.62933e-10	Trak2	protein_coding
ENSMUSG00000047606	435.692	317.902	553.483	-0.760385	0.101853	-6.94507	3.78283e-12	3.88079e-10	Ankrd34c	protein_coding
ENSMUSG00000032735	4083.1	3444.88	4721.32	-0.479038	0.0672675	-6.93224	4.14225e-12	4.22509e-10	Ablim3	protein_coding
ENSMUSG00000030590	969.034	787.77	1150.3	-0.590597	0.0838225	-6.92663	4.30981e-12	4.33704e-10	Fam98c	protein_coding
ENSMUSG00000052852	9876.21	8383.08	11369.4	-0.441865	0.0616669	-6.92653	4.31286e-12	4.33704e-10	Reep1	protein_coding
ENSMUSG00000048617	377.338	498.231	256.444	0.852166	0.108915	6.92612	4.32531e-12	4.33704e-10	Rtbdn	protein_coding
ENSMUSG00000030838	95.5625	141.285	49.8398	1.2361	0.158309	6.92161	4.4653e-12	4.45225e-10	Ush1c	protein_coding
ENSMUSG00000041468	621.651	453.73	789.573	-0.727505	0.0956184	-6.91615	4.64087e-12	4.60146e-10	Gpr12	protein_coding
ENSMUSG00000030946	1164.71	1457.71	871.711	0.689727	0.0919992	6.886	5.73826e-12	5.65793e-10	Lhpp	protein_coding
ENSMUSG00000036913	1243.86	913.643	1574.08	-0.75249	0.102727	-6.87012	6.41478e-12	6.29003e-10	Trim67	protein_coding
ENSMUSG00000042834	14842.3	11879.2	17805.4	-0.614126	0.0865791	-6.85707	7.02849e-12	6.85393e-10	Nrep	protein_coding
ENSMUSG00000026014	4571.38	3717.85	5424.91	-0.492738	0.0674683	-6.85324	7.2196e-12	7.00183e-10	Raph1	protein_coding
ENSMUSG00000031548	977.536	1163.75	791.32	0.620653	0.0907818	6.84991	7.3895e-12	7.12765e-10	Sfrp1	protein_coding
ENSMUSG00000035835	3901.99	3192.16	4611.82	-0.515254	0.0716734	-6.84627	7.58001e-12	7.2719e-10	Plppr3	protein_coding
ENSMUSG00000000184	3352.25	2337.2	4367.31	-0.836416	0.11149	-6.84013	7.91204e-12	7.54962e-10	Ccnd2	protein_coding
ENSMUSG00000020932	10479.2	12506.4	8451.98	0.530696	0.0731341	6.82192	8.98341e-12	8.52607e-10	Gfap	protein_coding
ENSMUSG00000020657	8203.12	9331.84	7074.4	0.439574	0.0635551	6.79936	1.05088e-11	9.92078e-10	Dnajc27	protein_coding
ENSMUSG00000062376	1459.79	1719.3	1200.27	0.507681	0.0713901	6.78628	1.1506e-11	1.08047e-09	Borcs7	protein_coding
ENSMUSG00000021613	2801.99	2243.53	3360.45	-0.592342	0.0835206	-6.78002	1.2016e-11	1.12242e-09	Hapln1	protein_coding
ENSMUSG00000046169	521.893	380.966	662.821	-0.762662	0.105507	-6.76521	1.33114e-11	1.23691e-09	Adamts6	protein_coding
ENSMUSG00000078851	492.45	375.17	609.73	-0.667623	0.092032	-6.76177	1.36313e-11	1.26004e-09	Hist3h2a	protein_coding
ENSMUSG00000019960	1388.96	1095.66	1682.27	-0.575686	0.0793204	-6.75785	1.40059e-11	1.28796e-09	Dusp6	protein_coding
ENSMUSG00000039824	475.101	338.198	612.004	-0.802054	0.110207	-6.75472	1.43108e-11	1.30922e-09	Myl6b	protein_coding
ENSMUSG00000054901	196.555	274.698	118.412	1.04996	0.139126	6.7512	1.46623e-11	1.33449e-09	Arhgef33	protein_coding
ENSMUSG00000042208	3552.12	2895.72	4208.52	-0.560926	0.0801079	-6.74989	1.47955e-11	1.33975e-09	0610010F05Rik	protein_coding
ENSMUSG00000032047	6903.5	6059.43	7747.56	-0.379041	0.0551162	-6.74315	1.5499e-11	1.39632e-09	Acat1	protein_coding
ENSMUSG00000018567	5133.31	4243.21	6023.4	-0.534159	0.0769065	-6.7328	1.66429e-11	1.49181e-09	Gabarap	protein_coding
ENSMUSG00000115729	116.535	69.6539	163.416	-1.0655	0.141784	-6.72445	1.76258e-11	1.57198e-09
ENSMUSG00000079179	1855.95	2174.54	1537.37	0.450582	0.0633352	6.7187	1.83359e-11	1.62713e-09	Rab10os	antisense
ENSMUSG00000028057	1281.94	1085.99	1477.9	-0.464112	0.0672895	-6.70164	2.06097e-11	1.8198e-09	Rit1	protein_coding
ENSMUSG00000100826	5741.8	4231.5	7252.1	-0.731216	0.100453	-6.69555	2.14859e-11	1.87848e-09	Ipw	processed_transcript
ENSMUSG00000041263	3081.12	2419.21	3743.02	-0.596331	0.0833479	-6.69601	2.14192e-11	1.87848e-09	Rusc1	protein_coding
ENSMUSG00000027993	9585.66	8369.46	10801.9	-0.371514	0.0540147	-6.69397	2.17197e-11	1.88961e-09	Trim2	protein_coding
ENSMUSG00000022342	1094.88	633.751	1556.01	-1.11246	0.14718	-6.68716	2.27546e-11	1.96999e-09	Kcnv1	protein_coding
ENSMUSG00000020803	1300.3	1032.59	1568.01	-0.624379	0.0900378	-6.68217	2.35432e-11	2.02837e-09	Txndc17	protein_coding
ENSMUSG00000029165	1664.45	1953.57	1375.32	0.484784	0.0690612	6.67665	2.44469e-11	2.09606e-09	Agbl5	protein_coding
ENSMUSG00000059991	1515.96	1798.98	1232.94	0.531798	0.0757856	6.66989	2.55989e-11	2.18427e-09	Nptx2	protein_coding
ENSMUSG00000068748	33899	27581.9	40216.1	-0.487277	0.0682718	-6.66838	2.58637e-11	2.19631e-09	Ptprz1	protein_coding
ENSMUSG00000071644	1537.87	1284.8	1790.95	-0.505086	0.0735938	-6.66134	2.71343e-11	2.29323e-09	Eef1g	protein_coding
ENSMUSG00000050963	1275.49	1018.09	1532.89	-0.564817	0.0798059	-6.65771	2.78134e-11	2.32845e-09	Kcns2	protein_coding
ENSMUSG00000052906	1108.56	1323.92	893.206	0.549242	0.0781562	6.65818	2.77245e-11	2.32845e-09	Ubxn8	protein_coding
ENSMUSG00000021256	1356.09	1081.73	1630.44	-0.590287	0.0846625	-6.64802	2.97055e-11	2.47518e-09	Vash1	protein_coding
ENSMUSG00000033460	2826.41	2221.57	3431.25	-0.576592	0.080349	-6.64724	2.98649e-11	2.47684e-09	Armcx1	protein_coding
ENSMUSG00000030792	109.274	51.7709	166.777	-1.2781	0.182867	-6.64473	3.03771e-11	2.4961e-09	Dkkl1	protein_coding
ENSMUSG00000048304	2851.76	2433.38	3270.15	-0.421974	0.0612766	-6.64467	3.03906e-11	2.4961e-09	Slitrk3	protein_coding
ENSMUSG00000023456	9945.9	8521.49	11370.3	-0.409469	0.0594968	-6.64404	3.05192e-11	2.4961e-09	Tpi1	protein_coding
ENSMUSG00000021670	7985.89	6303.13	9668.66	-0.552366	0.0768093	-6.62671	3.43241e-11	2.79443e-09	Hmgcr	protein_coding
ENSMUSG00000036353	2351.81	1843.36	2860.25	-0.6385	0.0918726	-6.62287	3.52294e-11	2.85503e-09	P2ry12	protein_coding
ENSMUSG00000024357	938.834	1132.28	745.383	0.608529	0.0878259	6.61681	3.67022e-11	2.96087e-09	Sil1	protein_coding
ENSMUSG00000029385	1183.44	941.321	1425.56	-0.60132	0.0866713	-6.61335	3.7572e-11	3.01519e-09	Ccng2	protein_coding
ENSMUSG00000032018	4269.08	3602.01	4936.15	-0.44893	0.0652563	-6.61279	3.77154e-11	3.01519e-09	Sc5d	protein_coding
ENSMUSG00000028337	1439.36	1099.64	1779.08	-0.662849	0.093857	-6.60363	4.01215e-11	3.19317e-09	Coro2a	protein_coding
ENSMUSG00000039470	4660.6	3869.32	5451.88	-0.482762	0.0697482	-6.59719	4.19031e-11	3.32007e-09	Zdhhc2	protein_coding
ENSMUSG00000020131	386.782	510.556	263.008	0.848162	0.113359	6.5959	4.22673e-11	3.33404e-09	Pcsk4	protein_coding
ENSMUSG00000027968	891.924	1052.77	731.078	0.552458	0.0815442	6.59097	4.36959e-11	3.43148e-09	Larp7	protein_coding
ENSMUSG00000050967	3359.56	2731.89	3987.23	-0.531231	0.076463	-6.58451	4.56382e-11	3.56822e-09	Creg2	protein_coding
ENSMUSG00000030301	2063.52	2473.32	1653.71	0.543159	0.0772378	6.5767	4.81011e-11	3.74429e-09	Ccdc91	protein_coding
ENSMUSG00000052395	757.079	916.336	597.821	0.593657	0.0850205	6.57509	4.86227e-11	3.76836e-09	Rft1	protein_coding
ENSMUSG00000038760	726.926	467.272	986.581	-0.936173	0.122925	-6.55945	5.40054e-11	4.16734e-09	Trhr	protein_coding
ENSMUSG00000064065	1282.32	863.189	1701.46	-0.890347	0.122491	-6.55615	5.52162e-11	4.24233e-09	Ipcef1	protein_coding
ENSMUSG00000030707	1564.93	1186.93	1942.93	-0.673989	0.0953906	-6.53723	6.26679e-11	4.7941e-09	Coro1a	protein_coding
ENSMUSG00000049122	578.783	455.302	702.265	-0.612722	0.0884943	-6.53581	6.32644e-11	4.81896e-09	Frmd3	protein_coding
ENSMUSG00000026489	683.06	822.883	543.236	0.606466	0.089153	6.52997	6.57808e-11	4.96799e-09	Coq8a	protein_coding
ENSMUSG00000063714	289.741	375.046	204.437	0.791483	0.109468	6.53058	6.55157e-11	4.96799e-09		antisense
ENSMUSG00000047507	5247.8	6262.45	4233.14	0.608691	0.0926166	6.515	7.26919e-11	5.46668e-09	Baiap3	protein_coding
ENSMUSG00000066441	1624.52	1335.32	1913.72	-0.522482	0.0770468	-6.50963	7.53365e-11	5.61795e-09	Rdh11	protein_coding
ENSMUSG00000022661	7155.47	6014.33	8296.62	-0.453122	0.0665659	-6.51013	7.5085e-11	5.61795e-09	Cd200	protein_coding
ENSMUSG00000031285	6259.21	4635.24	7883.18	-0.739758	0.106156	-6.50733	7.64962e-11	5.68056e-09	Dcx	protein_coding
ENSMUSG00000062372	1938.16	2357.26	1519.07	0.632694	0.0925679	6.50236	7.9071e-11	5.8473e-09	Otof	protein_coding
ENSMUSG00000026605	496.314	367.869	624.759	-0.729107	0.104667	-6.50058	8.00084e-11	5.89207e-09	Cenpf	protein_coding
ENSMUSG00000018554	274.222	376.476	171.969	0.987485	0.13388	6.47713	9.34834e-11	6.85597e-09	Ybx2	protein_coding
ENSMUSG00000057147	1311.87	1555.17	1068.56	0.541495	0.0799504	6.47352	9.57469e-11	6.99307e-09	Dph6	protein_coding
ENSMUSG00000026479	479.874	599.872	359.876	0.721433	0.105587	6.47092	9.74059e-11	7.08508e-09	Lamc2	protein_coding
ENSMUSG00000029161	1619.11	1289.16	1949.05	-0.610502	0.0904968	-6.46535	1.01064e-10	7.32115e-09	Cgref1	protein_coding
ENSMUSG00000025905	1006.72	769.616	1243.83	-0.641814	0.0913349	-6.46167	1.03554e-10	7.47103e-09	Oprk1	protein_coding
ENSMUSG00000026042	1131.39	901.841	1360.93	-0.600162	0.0889355	-6.4608	1.04153e-10	7.4838e-09	Col5a2	protein_coding
ENSMUSG00000054836	583.173	686.248	480.098	0.551248	0.0833615	6.45929	1.05195e-10	7.52826e-09	Elp6	protein_coding
ENSMUSG00000052751	1444.76	1664.94	1224.58	0.45658	0.0685002	6.45468	1.08445e-10	7.72965e-09	Repin1	protein_coding
ENSMUSG00000035576	1335.19	1092.16	1578.21	-0.548004	0.0821093	-6.4491	1.12516e-10	7.98775e-09	L3mbtl1	protein_coding
ENSMUSG00000046607	2597.94	2067.61	3128.27	-0.587475	0.0860954	-6.44161	1.18213e-10	8.35873e-09	Hrk	protein_coding
ENSMUSG00000020914	847.403	597.337	1097.47	-0.789846	0.109865	-6.4384	1.2074e-10	8.50352e-09	Top2a	protein_coding
ENSMUSG00000038205	2531.35	2118.33	2944.36	-0.468336	0.0696468	-6.43276	1.25306e-10	8.79026e-09	Prkab2	protein_coding
ENSMUSG00000038301	4834.41	3841.03	5827.78	-0.597003	0.0878465	-6.42245	1.34097e-10	9.36987e-09	Snx10	protein_coding
ENSMUSG00000066456	3360.96	2893.41	3828.5	-0.435265	0.0663311	-6.40904	1.46435e-10	1.01918e-08	Hmgn3	protein_coding
ENSMUSG00000033578	2826.42	2126.46	3526.38	-0.675849	0.0961865	-6.40541	1.49967e-10	1.03969e-08	Tmem35a	protein_coding
ENSMUSG00000043061	3749.32	4333.45	3165.19	0.438597	0.065528	6.40027	1.55101e-10	1.0711e-08	Tmem18	protein_coding
ENSMUSG00000029007	621.195	750.357	492.033	0.627162	0.0951175	6.39515	1.60388e-10	1.10332e-08	Agtrap	protein_coding
ENSMUSG00000051736	883.657	1050.77	716.544	0.538242	0.0797692	6.39144	1.64336e-10	1.12611e-08	Fam229b	protein_coding
ENSMUSG00000051435	363.878	456.503	271.252	0.701401	0.101507	6.38832	1.67723e-10	1.1449e-08	Fhad1	protein_coding
ENSMUSG00000028809	10479.8	11939	9020.57	0.392117	0.0591909	6.37986	1.7725e-10	1.2017e-08	Srrm1	protein_coding
ENSMUSG00000096943	128.654	176.466	80.8424	0.98928	0.142642	6.37973	1.77397e-10	1.2017e-08		lincRNA
ENSMUSG00000074129	519.952	402.388	637.516	-0.680009	0.102889	-6.37891	1.78356e-10	1.2036e-08	Rpl13a	protein_coding
ENSMUSG00000048721	901.752	1160.14	643.368	0.816442	0.121159	6.37	1.89024e-10	1.27075e-08	Fndc9	protein_coding
ENSMUSG00000030303	1821.62	1541.24	2102	-0.460982	0.0700245	-6.36369	1.96968e-10	1.31917e-08	Far2	protein_coding
ENSMUSG00000020288	1760.29	1476.38	2044.2	-0.46092	0.0695749	-6.33958	2.304e-10	1.53727e-08	Ahsa2	protein_coding
ENSMUSG00000063229	6545.41	5347.1	7743.72	-0.497521	0.0737306	-6.32356	2.55602e-10	1.69903e-08	Ldha	protein_coding
ENSMUSG00000056167	4016.65	4564.94	3468.35	0.386945	0.0592448	6.29834	3.00846e-10	1.99232e-08	Cnot10	protein_coding
ENSMUSG00000063882	6524.89	5687.73	7362.05	-0.419015	0.0655434	-6.29485	3.07707e-10	2.03018e-08	Uqcrh	protein_coding
ENSMUSG00000031134	3682.74	3168.67	4196.82	-0.426335	0.065876	-6.29239	3.12619e-10	2.05495e-08	Rbmx	protein_coding
ENSMUSG00000018919	162.355	219.502	105.209	0.936117	0.134413	6.28061	3.37238e-10	2.20104e-08	Tm4sf5	protein_coding
ENSMUSG00000031323	90.6008	131.323	49.8784	1.13752	0.164356	6.28057	3.37324e-10	2.20104e-08	Dmrtc1a	protein_coding
ENSMUSG00000020170	2911.85	3390.22	2433.48	0.470884	0.0716939	6.27372	3.52532e-10	2.29185e-08	Frs2	protein_coding
ENSMUSG00000021087	40788.6	35105.1	46472.1	-0.380453	0.058159	-6.26983	3.61453e-10	2.34127e-08	Rtn1	protein_coding
ENSMUSG00000062753	574.091	439.825	708.357	-0.697206	0.107444	-6.26355	3.76302e-10	2.42226e-08	AI413582	protein_coding
ENSMUSG00000053137	856.845	673.872	1039.82	-0.611129	0.0920597	-6.26283	3.78052e-10	2.42226e-08	Mapk11	protein_coding
ENSMUSG00000022797	7018.61	5817.79	8219.43	-0.499772	0.0763319	-6.26303	3.77575e-10	2.42226e-08	Tfrc	protein_coding
ENSMUSG00000036578	2665.38	2143.93	3186.82	-0.571021	0.0871148	-6.25496	3.97624e-10	2.5385e-08	Fxyd7	protein_coding
ENSMUSG00000041710	652.874	487.731	818.017	-0.695548	0.102041	-6.25429	3.99328e-10	2.54024e-08	Trpc5	protein_coding
ENSMUSG00000056258	7448.62	6263.81	8633.43	-0.437942	0.0665619	-6.25364	4.0099e-10	2.5417e-08	Kcnq3	protein_coding
ENSMUSG00000037035	455.947	343.896	567.999	-0.691351	0.103645	-6.23788	4.43543e-10	2.80142e-08	Inhbb	protein_coding
ENSMUSG00000048458	1126.42	748.538	1504.3	-0.899363	0.129569	-6.23554	4.50213e-10	2.83347e-08	Fam212b	protein_coding
ENSMUSG00000040365	2124.91	2478.81	1771.02	0.490611	0.0755957	6.23423	4.54001e-10	2.84721e-08	Trim41	protein_coding
ENSMUSG00000063801	5568.22	6274.54	4861.9	0.37646	0.0587477	6.23154	4.61876e-10	2.8864e-08	Ap3s2	protein_coding
ENSMUSG00000025420	352.341	449.606	255.077	0.768286	0.114164	6.22636	4.7739e-10	2.97289e-08	Katnal2	protein_coding
ENSMUSG00000026224	275.915	352.589	199.24	0.79583	0.121705	6.22179	4.91529e-10	3.05023e-08	4933407L21Rik	protein_coding
ENSMUSG00000078350	762.873	999.996	525.751	0.831808	0.120412	6.21914	4.99897e-10	3.09135e-08	Smim1	protein_coding
ENSMUSG00000019942	259.592	180.455	338.73	-0.857926	0.132943	-6.20713	5.39602e-10	3.3253e-08	Cdk1	protein_coding
ENSMUSG00000038702	1118.89	927.324	1310.46	-0.51231	0.0793908	-6.20273	5.54926e-10	3.4031e-08	Dsel	protein_coding
ENSMUSG00000026643	4430.38	3840.68	5020.08	-0.399438	0.0625445	-6.20241	5.56062e-10	3.4031e-08	Nmt2	protein_coding
ENSMUSG00000021130	6916.06	7948.97	5883.16	0.475785	0.0754359	6.20155	5.59096e-10	3.40991e-08	Galnt16	protein_coding
ENSMUSG00000025370	911.487	715.368	1107.61	-0.62828	0.0963509	-6.19999	5.64655e-10	3.43202e-08	Cdh9	protein_coding
ENSMUSG00000009013	3970.45	3054.12	4886.77	-0.673986	0.103156	-6.18438	6.23476e-10	3.77661e-08	Dynll1	protein_coding
ENSMUSG00000021662	1565.4	1257.63	1873.17	-0.541886	0.0820481	-6.17868	6.46381e-10	3.90203e-08	Arhgef28	protein_coding
ENSMUSG00000042015	2227.29	2536.07	1918.51	0.406661	0.0636595	6.17703	6.53195e-10	3.9298e-08	Wdr41	protein_coding
ENSMUSG00000032355	319.724	210.615	428.834	-0.901719	0.129001	-6.17598	6.57548e-10	3.94262e-08	Mlip	protein_coding
ENSMUSG00000024799	1145.04	918.126	1371.96	-0.554996	0.0844583	-6.16116	7.22118e-10	4.31521e-08	Vps51	protein_coding
ENSMUSG00000030711	265.648	360.783	170.513	0.945827	0.138758	6.15839	7.3486e-10	4.37661e-08	Sult1a1	protein_coding
ENSMUSG00000018405	431.96	310.448	553.471	-0.770224	0.114822	-6.15472	7.52124e-10	4.46445e-08	Mrm1	protein_coding
ENSMUSG00000103310	166.403	105.426	227.38	-0.944115	0.131953	-6.15323	7.59221e-10	4.49155e-08	Pcdha12	protein_coding
ENSMUSG00000051113	247.373	325.214	169.533	0.836142	0.121261	6.14611	7.94044e-10	4.68196e-08	Fam71e1	protein_coding
ENSMUSG00000041488	2246.2	2645.19	1847.22	0.489612	0.0749698	6.14439	8.02713e-10	4.7174e-08	Stx3	protein_coding
ENSMUSG00000036362	616.83	476.348	757.311	-0.659484	0.102203	-6.12465	9.08826e-10	5.32338e-08	P2ry13	protein_coding
ENSMUSG00000049775	22061.8	17130.7	26992.9	-0.655242	0.101416	-6.11641	9.57061e-10	5.58747e-08	Tmsb4x	protein_coding
ENSMUSG00000047139	1893.09	1358.47	2427.72	-0.804926	0.125204	-6.11558	9.62043e-10	5.59814e-08	Cd24a	protein_coding
ENSMUSG00000050248	431.627	536.455	326.799	0.662734	0.0995471	6.11124	9.88597e-10	5.73386e-08	Evc2	protein_coding
ENSMUSG00000049107	82.172	50.275	114.069	-1.01724	0.166136	-6.10995	9.96621e-10	5.76157e-08	Ntf3	protein_coding
ENSMUSG00000032946	3078.25	2328.19	3828.31	-0.704834	0.111649	-6.10357	1.03723e-09	5.97688e-08	Rasgrp2	protein_coding
ENSMUSG00000039936	959.666	733.578	1185.75	-0.66659	0.102624	-6.10205	1.04719e-09	5.99531e-08	Pik3cd	protein_coding
ENSMUSG00000031993	3499.06	4036.73	2961.38	0.486059	0.0783804	6.10235	1.04521e-09	5.99531e-08	Snx19	protein_coding
ENSMUSG00000028789	1015.15	1190.52	839.781	0.509302	0.0800159	6.0995	1.06401e-09	6.07204e-08	Azin2	protein_coding
ENSMUSG00000044349	122978	105945	140010	-0.416723	0.0662696	-6.0964	1.08483e-09	6.17102e-08	Snhg11	protein_coding
ENSMUSG00000021848	596.887	827.367	366.408	0.990063	0.141384	6.09517	1.09322e-09	6.19889e-08	Otx2	protein_coding
ENSMUSG00000001036	4838.79	4242.77	5434.8	-0.355149	0.0565973	-6.08488	1.16577e-09	6.58921e-08	Epn2	protein_coding
ENSMUSG00000039850	1398.44	1599.89	1197	0.421686	0.066887	6.08073	1.19637e-09	6.7407e-08	Endov	protein_coding
ENSMUSG00000028975	1345.86	1540.98	1150.74	0.423445	0.0671808	6.0751	1.23907e-09	6.95917e-08	Pex14	protein_coding
ENSMUSG00000071862	3401.15	2753.7	4048.61	-0.562338	0.0883755	-6.06573	1.31355e-09	7.35425e-08	Lrrtm2	protein_coding
ENSMUSG00000097589	246.864	180.214	313.514	-0.769139	0.120838	-6.06174	1.34661e-09	7.51559e-08	Dleu2	processed_transcript
ENSMUSG00000031130	124.862	80.3824	169.342	-0.954347	0.145854	-6.05989	1.36216e-09	7.57858e-08	Brs3	protein_coding
ENSMUSG00000032297	2575.52	2958.72	2192.32	0.458276	0.0736061	6.05739	1.38347e-09	7.67308e-08	Celf6	protein_coding
ENSMUSG00000048216	2305.04	1907.65	2702.42	-0.494376	0.0776174	-6.04591	1.48565e-09	8.21411e-08	Gpr85	protein_coding
ENSMUSG00000025558	8611.54	7148.62	10074.5	-0.479056	0.0751693	-6.04085	1.53306e-09	8.44537e-08	Dock9	protein_coding
ENSMUSG00000066800	966.492	815.878	1117.11	-0.468492	0.0750104	-6.04043	1.53699e-09	8.44537e-08	Rnasel	protein_coding
ENSMUSG00000026344	5733.36	4818.21	6648.51	-0.410681	0.0639134	-6.02843	1.65563e-09	9.06917e-08	Lypd1	protein_coding
ENSMUSG00000024180	527.906	637.754	418.057	0.580884	0.0900174	6.02682	1.67219e-09	9.13169e-08	Tmem8	protein_coding
ENSMUSG00000025959	3661.39	3126.64	4196.14	-0.403058	0.0639015	-6.02144	1.72872e-09	9.41145e-08	Klf7	protein_coding
ENSMUSG00000042269	63.4941	96.7636	30.2245	1.25698	0.17982	6.01685	1.77848e-09	9.65276e-08	Fam92b	protein_coding
ENSMUSG00000057522	8033.26	8897.16	7169.37	0.326923	0.0532448	6.0116	1.83701e-09	9.8798e-08	Spop	protein_coding
ENSMUSG00000018659	2121.85	2395.8	1847.89	0.398598	0.064737	6.01245	1.82745e-09	9.8798e-08	Pnpo	protein_coding
ENSMUSG00000073096	999.782	1169.61	829.952	0.517235	0.0836473	6.01161	1.83688e-09	9.8798e-08	Lrrc61	protein_coding
ENSMUSG00000038112	6196.29	4484.99	7907.59	-0.724915	0.106672	-6.00785	1.87997e-09	1.00499e-07	AW551984	protein_coding
ENSMUSG00000112278	153.163	203.436	102.891	0.888107	0.135977	6.00811	1.87701e-09	1.00499e-07
ENSMUSG00000025607	3285.18	3803.56	2766.8	0.46328	0.0741217	6.00734	1.88592e-09	1.00515e-07	Copg2	protein_coding
ENSMUSG00000037062	7033.09	6209.05	7857.12	-0.346686	0.056189	-6.00627	1.89837e-09	1.00875e-07	Sh3glb1	protein_coding
ENSMUSG00000069808	928.124	753.622	1102.63	-0.526817	0.082647	-6.00495	1.91392e-09	1.01398e-07	Fam57a	protein_coding
ENSMUSG00000024261	7390.15	6292.9	8487.4	-0.387495	0.0610708	-6.00172	1.95235e-09	1.03126e-07	Syt4	protein_coding
ENSMUSG00000046523	1027.2	782.668	1271.74	-0.687999	0.108268	-5.99918	1.98322e-09	1.04343e-07	Kctd4	protein_coding
ENSMUSG00000041774	517.805	398.504	637.105	-0.653444	0.102078	-5.99885	1.98716e-09	1.04343e-07	Ydjc	protein_coding
ENSMUSG00000029561	123.094	165.853	80.3342	0.931646	0.145286	5.99218	2.07044e-09	1.08396e-07	Oasl2	protein_coding
ENSMUSG00000022365	2379.59	2651.46	2107.72	0.365185	0.0600772	5.9828	2.19337e-09	1.14494e-07	Derl1	protein_coding
ENSMUSG00000020652	297.838	367.986	227.69	0.672676	0.106248	5.97335	2.3243e-09	1.20973e-07	Cenpo	protein_coding
ENSMUSG00000026841	1571.4	1900.67	1242.13	0.591424	0.0926364	5.97252	2.33614e-09	1.21234e-07	Fibcd1	protein_coding
ENSMUSG00000085042	81.1017	121.105	41.0982	1.18921	0.174429	5.97112	2.35631e-09	1.21924e-07	Abhd11os	antisense
ENSMUSG00000017724	874.981	699.995	1049.97	-0.561943	0.0882496	-5.96801	2.40164e-09	1.23908e-07	Etv4	protein_coding
ENSMUSG00000000031	837.1	1111.32	562.876	0.856091	0.125875	5.96746	2.40979e-09	1.23968e-07	H19	lincRNA
ENSMUSG00000022360	339.591	262.361	416.82	-0.654999	0.104519	-5.96216	2.4893e-09	1.27688e-07	Atad2	protein_coding
ENSMUSG00000032839	1478.62	1210.26	1746.98	-0.510845	0.0807502	-5.95993	2.5235e-09	1.29069e-07	Trpc1	protein_coding
ENSMUSG00000030161	15333.2	13725.7	16940.7	-0.301317	0.0493444	-5.95362	2.62275e-09	1.3376e-07	Gabarapl1	protein_coding
ENSMUSG00000016253	2010.33	2293.6	1727.07	0.433815	0.0709547	5.94871	2.70267e-09	1.37441e-07	Nelfcd	protein_coding
ENSMUSG00000001034	1272.68	1082.76	1462.61	-0.45628	0.0746227	-5.94386	2.78389e-09	1.41167e-07	Mapk7	protein_coding
ENSMUSG00000019471	4319.46	4813.18	3825.74	0.350987	0.0578161	5.93799	2.88543e-09	1.45899e-07	Cdc37	protein_coding
ENSMUSG00000038552	4121.48	3578.23	4664.74	-0.421104	0.0696144	-5.93596	2.9214e-09	1.47298e-07	Fndc4	protein_coding
ENSMUSG00000027852	3644.11	3050.78	4237.43	-0.49271	0.0801473	-5.93081	3.01453e-09	1.51563e-07	Nras	protein_coding
ENSMUSG00000032534	1576.99	1842.65	1311.34	0.482694	0.0775127	5.92973	3.03442e-09	1.52132e-07	Cep63	protein_coding
ENSMUSG00000044475	1108.97	1295.26	922.676	0.470702	0.0754979	5.89994	3.63638e-09	1.81799e-07	Ascc1	protein_coding
ENSMUSG00000028226	1452.09	1199.25	1704.93	-0.522163	0.0850061	-5.89528	3.74043e-09	1.86475e-07	Mmp16	protein_coding
ENSMUSG00000105039	56.286	85.9106	26.6614	1.24157	0.18326	5.89305	3.79141e-09	1.88487e-07
ENSMUSG00000106383	345.015	420.059	269.972	0.622556	0.0998889	5.88426	3.99835e-09	1.9822e-07
ENSMUSG00000037111	3744.4	3116.63	4372.18	-0.448686	0.0714916	-5.88125	4.07171e-09	2.01294e-07	Setd7	protein_coding
ENSMUSG00000023067	972.488	753.811	1191.16	-0.62445	0.0986077	-5.87687	4.18094e-09	2.0612e-07	Cdkn1a	protein_coding
ENSMUSG00000040125	6911.6	5591.55	8231.66	-0.52033	0.0822605	-5.87242	4.29482e-09	2.11148e-07	Gpr26	protein_coding
ENSMUSG00000001467	6240.98	4871.75	7610.2	-0.597372	0.0935407	-5.8716	4.31606e-09	2.11606e-07	Cyp51	protein_coding
ENSMUSG00000020919	1644.57	1908.05	1381.09	0.482745	0.0798035	5.86066	4.61045e-09	2.25417e-07	Stat5b	protein_coding
ENSMUSG00000004360	3795.63	3301.53	4289.74	-0.346618	0.056618	-5.85749	4.69902e-09	2.29116e-07	9330159F19Rik	protein_coding
ENSMUSG00000028613	6721.43	5909.61	7533.24	-0.350181	0.0579565	-5.8549	4.77292e-09	2.32081e-07	Lrp8	protein_coding
ENSMUSG00000040557	507.36	630.218	384.502	0.659223	0.102562	5.85419	4.79339e-09	2.3244e-07	Mettl27	protein_coding
ENSMUSG00000006517	1099.55	851.005	1348.09	-0.641448	0.103499	-5.84981	4.92146e-09	2.38e-07	Mvd	protein_coding
ENSMUSG00000030835	5227.01	6018.45	4435.56	0.47873	0.0805319	5.84826	4.96741e-09	2.3957e-07	Nomo1	protein_coding
ENSMUSG00000031577	1105.75	1292.58	918.922	0.491228	0.0803049	5.84698	5.00576e-09	2.40765e-07	Tti2	protein_coding
ENSMUSG00000039901	999.881	1146.63	853.134	0.467883	0.0788278	5.83949	5.23611e-09	2.50487e-07	9130011E15Rik	protein_coding
ENSMUSG00000057058	150.329	197.577	103.082	0.841133	0.130643	5.83973	5.22862e-09	2.50487e-07	Skap1	protein_coding
ENSMUSG00000102312	161.077	113.46	208.693	-0.806166	0.127394	-5.83868	5.26157e-09	2.51028e-07	Pcdha3	protein_coding
ENSMUSG00000026404	574.935	699.536	450.334	0.590508	0.0932703	5.83675	5.32275e-09	2.53266e-07	Ddx59	protein_coding
ENSMUSG00000007036	2542.93	2892.56	2193.3	0.400616	0.0661599	5.83599	5.34706e-09	2.53743e-07	Abhd16a	protein_coding
ENSMUSG00000049630	1424.72	1051.9	1797.54	-0.68091	0.102848	-5.83452	5.39455e-09	2.55004e-07	C1ql3	protein_coding
ENSMUSG00000046598	5293.24	4395.16	6191.33	-0.472841	0.076523	-5.83384	5.41676e-09	2.55004e-07	Bdh1	protein_coding
ENSMUSG00000033712	4371.38	4890.66	3852.09	0.36246	0.0606571	5.83387	5.41555e-09	2.55004e-07	Ccar2	protein_coding
ENSMUSG00000024500	6134.94	5314.29	6955.59	-0.376177	0.0619188	-5.83048	5.52665e-09	2.5949e-07	Ppp2r2b	protein_coding
ENSMUSG00000015961	4075.16	3576.66	4573.66	-0.362947	0.0604868	-5.82517	5.70546e-09	2.67178e-07	Adss	protein_coding
ENSMUSG00000051335	1701.41	1439.75	1963.06	-0.43401	0.0710471	-5.82232	5.80357e-09	2.71057e-07	Gfod1	protein_coding
ENSMUSG00000030111	438.082	544.074	332.091	0.712327	0.123801	5.82098	5.85045e-09	2.72529e-07	A2m	protein_coding
ENSMUSG00000027575	3888.72	4329.67	3447.77	0.354822	0.059836	5.81735	5.97873e-09	2.77776e-07	Arfgap1	protein_coding
ENSMUSG00000056515	4631.38	4073.4	5189.36	-0.373104	0.0626312	-5.81657	6.00657e-09	2.78341e-07	Rab31	protein_coding
ENSMUSG00000000088	5526.48	4832.91	6220.04	-0.388201	0.0651539	-5.81566	6.03968e-09	2.79001e-07	Cox5a	protein_coding
ENSMUSG00000038836	837.945	990.977	684.912	0.526377	0.0858324	5.815	6.06321e-09	2.79001e-07	Agbl3	protein_coding
ENSMUSG00000002930	239.082	332.984	145.18	1.00054	0.149508	5.81487	6.06798e-09	2.79001e-07	Ppp1r17	protein_coding
ENSMUSG00000041571	17701	13883.4	21518.6	-0.634341	0.103738	-5.81402	6.09885e-09	2.79696e-07	Selenow	protein_coding
ENSMUSG00000015880	129.145	88.6239	169.665	-0.854151	0.143677	-5.81194	6.1754e-09	2.82477e-07	Ncapg	protein_coding
ENSMUSG00000032245	451.2	537.432	364.969	0.555948	0.0911781	5.80888	6.28913e-09	2.8694e-07	Cln6	protein_coding
ENSMUSG00000043629	334.917	251.119	418.714	-0.696495	0.111034	-5.80831	6.3108e-09	2.8719e-07	1700019D03Rik	protein_coding
ENSMUSG00000051278	580.67	729.9	431.44	0.691306	0.107174	5.80785	6.3279e-09	2.87232e-07	Zgrf1	protein_coding
ENSMUSG00000028863	6377.06	7049.57	5704.54	0.32693	0.0552146	5.80658	6.37626e-09	2.88688e-07	Meaf6	protein_coding
ENSMUSG00000024030	1572.79	1859.25	1286.32	0.566348	0.0968587	5.799	6.67122e-09	3.01274e-07	Abcg1	protein_coding
ENSMUSG00000048327	272.145	193.322	350.968	-0.791643	0.127707	-5.79553	6.81045e-09	3.06781e-07	Ckap2l	protein_coding
ENSMUSG00000020547	2648.15	2229.6	3066.71	-0.491001	0.0824557	-5.79508	6.8288e-09	3.06829e-07	Bzw2	protein_coding
ENSMUSG00000002228	96.6405	58.5628	134.718	-1.00227	0.155043	-5.78778	7.13239e-09	3.19661e-07	Ppm1j	protein_coding
ENSMUSG00000022340	4167.26	3552.13	4782.38	-0.403233	0.0661836	-5.78416	7.28774e-09	3.258e-07	Sybu	protein_coding
ENSMUSG00000051098	3020.28	2533.24	3507.33	-0.463144	0.0763318	-5.77482	7.70357e-09	3.43525e-07	Mblac2	protein_coding
ENSMUSG00000032182	796.899	929.165	664.632	0.491071	0.0816774	5.77016	7.91976e-09	3.514e-07	Yipf2	protein_coding
ENSMUSG00000034384	198.083	283.066	113.1	1.03718	0.175018	5.77041	7.90785e-09	3.514e-07	Barhl2	protein_coding
ENSMUSG00000006356	2153.57	1656.09	2651.06	-0.649247	0.104774	-5.76589	8.12292e-09	3.59515e-07	Crip2	protein_coding
ENSMUSG00000052372	940.73	767.933	1113.53	-0.531136	0.087303	-5.76205	8.30988e-09	3.66875e-07	Il1rapl1	protein_coding
ENSMUSG00000022453	899.2	1055.79	742.615	0.510495	0.0848062	5.76085	8.36931e-09	3.68523e-07	Naga	protein_coding
ENSMUSG00000003849	245.65	308.53	182.77	0.712209	0.115697	5.76046	8.38874e-09	3.68523e-07	Nqo1	protein_coding
ENSMUSG00000039706	1981.87	1667.21	2296.53	-0.466346	0.0775263	-5.75682	8.57149e-09	3.75622e-07	Ldb2	protein_coding
ENSMUSG00000026383	1013.49	1170.86	856.12	0.45357	0.0756883	5.74981	8.93454e-09	3.90567e-07	Epb41l5	protein_coding
ENSMUSG00000025889	9473.35	6725.83	12220.9	-0.790812	0.124783	-5.74851	9.00312e-09	3.92598e-07	Snca	protein_coding
ENSMUSG00000000058	1218.19	940.286	1496.1	-0.647553	0.105262	-5.74389	9.25263e-09	4.02489e-07	Cav2	protein_coding
ENSMUSG00000042590	2963.88	2605.5	3322.25	-0.360494	0.0609914	-5.74063	9.4327e-09	4.09319e-07	Ipo11	protein_coding
ENSMUSG00000058254	22205.6	18646	25765.1	-0.455734	0.0754953	-5.73114	9.97591e-09	4.31835e-07	Tspan7	protein_coding
ENSMUSG00000026872	5209.53	4455.56	5963.49	-0.421295	0.07054	-5.7272	1.021e-08	4.40892e-07	Zeb2	protein_coding
ENSMUSG00000026458	6377.52	5471.35	7283.7	-0.41795	0.0704072	-5.72349	1.04359e-08	4.49555e-07	Ppfia4	protein_coding
ENSMUSG00000044442	1602.25	1853.75	1350.74	0.439925	0.0729345	5.72102	1.05888e-08	4.55036e-07	N6amt1	protein_coding
ENSMUSG00000021614	3371.28	2733.08	4009.49	-0.543332	0.0900756	-5.71803	1.07764e-08	4.60133e-07	Vcan	protein_coding
ENSMUSG00000091264	6912.79	5903.35	7922.22	-0.416037	0.0694366	-5.71794	1.07824e-08	4.60133e-07	Smim13	protein_coding
ENSMUSG00000001416	4798.62	4271.53	5325.71	-0.325644	0.0554943	-5.71789	1.07852e-08	4.60133e-07	Cct3	protein_coding
ENSMUSG00000028843	2112.06	1751.06	2473.06	-0.529711	0.0903007	-5.71677	1.08568e-08	4.62078e-07	Sh3bgrl3	protein_coding
ENSMUSG00000035967	4492.96	3969.74	5016.18	-0.363163	0.0621801	-5.71378	1.10495e-08	4.69156e-07	Ints6l	protein_coding
ENSMUSG00000033174	5716.87	5202.92	6230.83	-0.310561	0.0541785	-5.70295	1.17749e-08	4.97574e-07	Mgll	protein_coding
ENSMUSG00000020538	1627.02	1925.84	1328.2	0.531517	0.0887763	5.7031	1.17647e-08	4.97574e-07	Srebf1	protein_coding
ENSMUSG00000028347	5855.57	5190.89	6520.25	-0.348256	0.0596935	-5.70155	1.18724e-08	5.005e-07	Tmeff1	protein_coding
ENSMUSG00000025728	5567.96	6219.18	4916.73	0.329373	0.0558525	5.69818	1.21092e-08	5.09275e-07	Pigq	protein_coding
ENSMUSG00000031776	6677.11	5921.93	7432.29	-0.347555	0.0596053	-5.69705	1.21896e-08	5.11445e-07	Arl2bp	protein_coding
ENSMUSG00000042406	4435.35	3927.78	4942.93	-0.326575	0.0555262	-5.6966	1.2222e-08	5.11596e-07	Atf4	protein_coding
ENSMUSG00000020628	2399.55	2750.29	2048.82	0.465855	0.0807616	5.69559	1.22945e-08	5.13419e-07	Trappc12	protein_coding
ENSMUSG00000002458	950.868	802.152	1099.58	-0.470311	0.0797151	-5.6936	1.2439e-08	5.18232e-07	Rgs19	protein_coding
ENSMUSG00000015879	957.659	730.913	1184.4	-0.624169	0.0985447	-5.69259	1.25124e-08	5.2007e-07	Fam184b	protein_coding
ENSMUSG00000070699	641.144	797.054	485.234	0.648797	0.10287	5.69135	1.26036e-08	5.22636e-07	Sars2	protein_coding
ENSMUSG00000025946	108.134	65.7717	150.497	-0.982219	0.147133	-5.68507	1.30756e-08	5.40947e-07	Pth2r	protein_coding
ENSMUSG00000022296	5748.41	5095.48	6401.33	-0.35582	0.0613096	-5.68217	1.32995e-08	5.4893e-07	Baalc	protein_coding
ENSMUSG00000037010	1067.02	764.041	1370	-0.764885	0.124729	-5.67517	1.38547e-08	5.7052e-07	Apln	protein_coding
ENSMUSG00000042734	3334.24	2865.99	3802.49	-0.424522	0.0724108	-5.672	1.4114e-08	5.79851e-07	Ttc9	protein_coding
ENSMUSG00000064247	787.184	934.948	639.42	0.54775	0.0923476	5.66586	1.46285e-08	5.99601e-07	Plcxd1	protein_coding
ENSMUSG00000025161	240.644	311.042	170.247	0.789471	0.12775	5.65904	1.52218e-08	6.22482e-07	Slc16a3	protein_coding
ENSMUSG00000018669	1579.62	1833.84	1325.4	0.431966	0.0716995	5.65071	1.5979e-08	6.51941e-07	Cdk5rap3	protein_coding
ENSMUSG00000043259	2658.95	2329.97	2987.93	-0.38274	0.066126	-5.64548	1.64724e-08	6.70533e-07	Fam13c	protein_coding
ENSMUSG00000055723	1736.24	1457.35	2015.13	-0.423162	0.070193	-5.64101	1.69057e-08	6.86594e-07	Rras2	protein_coding
ENSMUSG00000050108	23.7944	41.8489	5.73996	1.3719	0.211623	5.63848	1.71559e-08	6.95166e-07	Bpifc	protein_coding
ENSMUSG00000025068	1861.1	1611.01	2111.2	-0.392737	0.0672092	-5.63619	1.7385e-08	7.02844e-07	Gsto1	protein_coding
ENSMUSG00000056486	11113.2	8842.68	13383.7	-0.585042	0.0973113	-5.63575	1.74294e-08	7.03039e-07	Chn1	protein_coding
ENSMUSG00000030077	17945.2	15165.6	20724.8	-0.435314	0.0733139	-5.63247	1.77642e-08	7.14918e-07	Chl1	protein_coding
ENSMUSG00000030589	201.328	260.508	142.147	0.780387	0.124703	5.63143	1.78726e-08	7.17653e-07	Rasgrp4	protein_coding
ENSMUSG00000049420	770.222	615.392	925.052	-0.553139	0.0909022	-5.6301	1.801e-08	7.2154e-07	Tmem200a	protein_coding
ENSMUSG00000059187	1211	941.765	1480.24	-0.616042	0.101088	-5.62092	1.89947e-08	7.59273e-07	Fam19a1	protein_coding
ENSMUSG00000013539	2333.87	2041.37	2626.37	-0.387448	0.0672753	-5.61746	1.93783e-08	7.7287e-07	Tango2	protein_coding
ENSMUSG00000026516	5081.04	5695.06	4467.02	0.33069	0.0565888	5.61548	1.9602e-08	7.80037e-07	Nvl	protein_coding
ENSMUSG00000024925	369.32	289.887	448.754	-0.618311	0.104822	-5.60946	2.02954e-08	8.02233e-07	Rnaseh2c	protein_coding
ENSMUSG00000078202	1574.42	1335	1813.83	-0.4599	0.079417	-5.60955	2.02857e-08	8.02233e-07	Nrarp	protein_coding
ENSMUSG00000043439	315.05	395.708	234.392	0.716201	0.119623	5.60951	2.02896e-08	8.02233e-07	Epop	protein_coding
ENSMUSG00000025255	2968.04	3727.37	2208.72	0.703191	0.117157	5.60471	2.08607e-08	8.22747e-07	Zfhx4	protein_coding
ENSMUSG00000036339	1390.03	1731.37	1048.7	0.708198	0.124046	5.60249	2.11298e-08	8.31512e-07	Tmem260	protein_coding
ENSMUSG00000033063	817.994	598.542	1037.45	-0.714381	0.113618	-5.59953	2.14937e-08	8.43961e-07	Cntnap3	protein_coding
ENSMUSG00000029208	5943.27	6699.8	5186.73	0.342831	0.058545	5.59814	2.16659e-08	8.48843e-07	Guf1	protein_coding
ENSMUSG00000020719	24707.3	21959.4	27455.2	-0.307483	0.0530887	-5.59694	2.18165e-08	8.52862e-07	Ddx5	protein_coding
ENSMUSG00000027306	263.807	188.636	338.978	-0.775117	0.12904	-5.59633	2.18941e-08	8.54015e-07	Nusap1	protein_coding
ENSMUSG00000033342	3018.6	2477.17	3560.04	-0.508302	0.0853552	-5.59594	2.19433e-08	8.54057e-07	Plppr5	protein_coding
ENSMUSG00000096472	1566.99	1331.87	1802.12	-0.425116	0.0723607	-5.59273	2.23531e-08	8.68102e-07	Cdkn2d	protein_coding
ENSMUSG00000037355	1595.64	1843.55	1347.73	0.41377	0.0695408	5.59096	2.25818e-08	8.75071e-07	Uvssa	protein_coding
ENSMUSG00000036304	254.3	178.3	330.3	-0.818737	0.137982	-5.58665	2.31497e-08	8.95123e-07	Zdhhc23	protein_coding
ENSMUSG00000001891	3230.59	2854.39	3606.78	-0.33383	0.0578384	-5.5843	2.34649e-08	9.05335e-07	Ugp2	protein_coding
ENSMUSG00000034613	2956.81	2578	3335.63	-0.337091	0.0575751	-5.58334	2.35939e-08	9.0834e-07	Ppm1h	protein_coding
ENSMUSG00000025579	11840.9	13917.6	9764.26	0.556738	0.101247	5.58118	2.38895e-08	9.17731e-07	Gaa	protein_coding
ENSMUSG00000034209	207.265	123.634	290.895	-1.00917	0.169305	-5.57999	2.40537e-08	9.20055e-07	Rasl10a	protein_coding
ENSMUSG00000013698	25828.9	22807.5	28850.3	-0.362286	0.0633384	-5.58013	2.40345e-08	9.20055e-07	Pea15a	protein_coding
ENSMUSG00000076432	3643.81	3096.88	4190.75	-0.425977	0.0726896	-5.57613	2.45921e-08	9.36611e-07	Ywhaq	protein_coding
ENSMUSG00000085438	26362.4	22882.9	29842	-0.409472	0.0715175	-5.57625	2.45759e-08	9.36611e-07	1700020I14Rik	lincRNA
ENSMUSG00000014837	2185.97	1874.36	2497.57	-0.446099	0.0783777	-5.57182	2.52087e-08	9.58039e-07	4931428F04Rik	protein_coding
ENSMUSG00000039145	4664.76	3924.41	5405.11	-0.43476	0.0735844	-5.56094	2.6832e-08	1.01755e-06	Camk1d	protein_coding
ENSMUSG00000022865	8681.41	6995.56	10367.3	-0.557571	0.0942607	-5.5584	2.72258e-08	1.03028e-06	Cxadr	protein_coding
ENSMUSG00000059742	2293.53	1872.69	2714.36	-0.520485	0.0878632	-5.55626	2.75611e-08	1.04075e-06	Kcnh7	protein_coding
ENSMUSG00000020024	2243.39	1952.34	2534.44	-0.408732	0.0719591	-5.55325	2.80409e-08	1.05662e-06	Cep83	protein_coding
ENSMUSG00000102018	120.421	160.64	80.202	0.869878	0.141247	5.5521	2.82259e-08	1.06134e-06	K230010J24Rik	protein_coding
ENSMUSG00000020142	4217.48	3541.34	4893.61	-0.409823	0.0686165	-5.55053	2.848e-08	1.06863e-06	Slc1a4	protein_coding
ENSMUSG00000016150	6007.07	5127.23	6886.91	-0.382312	0.0647853	-5.54814	2.88719e-08	1.08105e-06	Tenm1	protein_coding
ENSMUSG00000095123	1193.57	1372.49	1014.66	0.430863	0.0742109	5.54448	2.9483e-08	1.10161e-06		lincRNA
ENSMUSG00000019945	135.064	172.873	97.2557	0.774961	0.134264	5.54122	3.00365e-08	1.11993e-06	Cabcoco1	protein_coding
ENSMUSG00000019865	193.829	126.901	260.758	-0.908297	0.161374	-5.53709	3.07537e-08	1.14427e-06	Nmbr	protein_coding
ENSMUSG00000001763	1071.48	1254.62	888.338	0.494801	0.0849979	5.53551	3.10324e-08	1.15222e-06	Tspan33	protein_coding
ENSMUSG00000018548	13601.1	12131.3	15071	-0.316998	0.0557223	-5.53454	3.12038e-08	1.15617e-06	Trim37	protein_coding
ENSMUSG00000058013	6070.87	5123.7	7018.04	-0.444475	0.0763859	-5.53044	3.19424e-08	1.18107e-06	Sept11	protein_coding
ENSMUSG00000109714	257.798	188.839	326.758	-0.735281	0.124047	-5.52888	3.22282e-08	1.18916e-06
ENSMUSG00000025287	655.27	521.201	789.339	-0.557098	0.0928462	-5.51976	3.39457e-08	1.24994e-06	Acot9	protein_coding
ENSMUSG00000028773	1008.34	846.577	1170.1	-0.499012	0.088276	-5.5178	3.43261e-08	1.26132e-06	Fabp3	protein_coding
ENSMUSG00000028693	3243.94	2828.73	3659.14	-0.378775	0.0663894	-5.51688	3.45061e-08	1.26532e-06	Nasp	protein_coding
ENSMUSG00000022537	2365.11	1936.79	2793.44	-0.525832	0.0906364	-5.51384	3.51081e-08	1.28474e-06	Tmem44	protein_coding
ENSMUSG00000039463	1557.1	1793.5	1320.7	0.444295	0.077238	5.51197	3.54832e-08	1.29579e-06	Slc9a8	protein_coding
ENSMUSG00000035769	421.902	498.767	345.037	0.530948	0.0918567	5.51161	3.5557e-08	1.29582e-06	Xylb	protein_coding
ENSMUSG00000059518	1152.97	944.521	1361.42	-0.559793	0.099351	-5.51108	3.56639e-08	1.29705e-06	Znhit1	protein_coding
ENSMUSG00000043843	4327.7	5248.31	3407.09	0.581233	0.0970876	5.50972	3.59395e-08	1.30441e-06	Tmem145	protein_coding
ENSMUSG00000063694	476.068	361.676	590.46	-0.660503	0.109894	-5.50866	3.61571e-08	1.3047e-06	Cycs	protein_coding
ENSMUSG00000025384	1412.03	1148.59	1675.46	-0.525478	0.0896679	-5.50849	3.61917e-08	1.3047e-06	Faap100	protein_coding
ENSMUSG00000001175	91430.8	80186.4	102675	-0.370372	0.0651707	-5.50888	3.61115e-08	1.3047e-06	Calm1	protein_coding
ENSMUSG00000008318	357.877	443.181	272.573	0.668651	0.114207	5.50825	3.62418e-08	1.3047e-06	Relt	protein_coding
ENSMUSG00000074575	827.162	504.548	1149.78	-0.974465	0.146965	-5.50758	3.63808e-08	1.30706e-06	Kcng1	protein_coding
ENSMUSG00000021779	911.968	692.405	1131.53	-0.643486	0.10498	-5.50658	3.65873e-08	1.30918e-06	Thrb	protein_coding
ENSMUSG00000038569	514.443	619.693	409.194	0.579658	0.0989478	5.50682	3.65374e-08	1.30918e-06	Rad9b	protein_coding
ENSMUSG00000020782	57.8954	82.5859	33.205	1.0307	0.177378	5.50372	3.71861e-08	1.32793e-06	Llgl2	protein_coding
ENSMUSG00000022665	710.554	596.131	824.977	-0.492137	0.0870963	-5.49963	3.80595e-08	1.35638e-06	Ccdc80	protein_coding
ENSMUSG00000029030	5137.52	4622.09	5652.95	-0.300957	0.0535062	-5.49786	3.84426e-08	1.36729e-06	Tprgl	protein_coding
ENSMUSG00000029004	6269.41	5341.98	7196.85	-0.409467	0.0706366	-5.49354	3.93949e-08	1.39241e-06	Kmt2e	protein_coding
ENSMUSG00000031278	4917.07	4192.91	5641.24	-0.389001	0.0665862	-5.49379	3.93397e-08	1.39241e-06	Acsl4	protein_coding
ENSMUSG00000055067	1740.67	1954.98	1526.37	0.391935	0.0701636	5.49363	3.93753e-08	1.39241e-06	Smyd3	protein_coding
ENSMUSG00000002804	313.642	398.483	228.801	0.721193	0.11765	5.49324	3.94625e-08	1.39241e-06	Nudt14	protein_coding
ENSMUSG00000020431	21278.2	16391.5	26164.9	-0.616924	0.101579	-5.49237	3.96568e-08	1.39649e-06	Adcy1	protein_coding
ENSMUSG00000072653	1021.55	1187.81	855.297	0.471214	0.0817111	5.49097	3.99723e-08	1.40481e-06	Zfp783	transcribed_unprocessed_pseudogene
ENSMUSG00000048271	6514.35	7144.97	5883.74	0.283454	0.0504646	5.48569	4.11868e-08	1.44463e-06	Rbm33	protein_coding
ENSMUSG00000072720	225.362	280.713	170.011	0.677882	0.114637	5.47931	4.2698e-08	1.49468e-06	Myo18b	protein_coding
ENSMUSG00000030898	525.789	366.022	685.555	-0.785287	0.124914	-5.47785	4.30533e-08	1.50415e-06	Cckbr	protein_coding
ENSMUSG00000023951	3764.73	3288.8	4240.67	-0.382161	0.0677617	-5.4773	4.31857e-08	1.50581e-06	Vegfa	protein_coding
ENSMUSG00000050211	2237.85	1584.17	2891.53	-0.788631	0.136916	-5.4738	4.40484e-08	1.52988e-06	Pla2g4e	protein_coding
ENSMUSG00000016559	7268.11	8097.67	6438.55	0.327302	0.057846	5.47395	4.40105e-08	1.52988e-06	H3f3b	protein_coding
ENSMUSG00000097993	142.263	206.157	78.3682	1.07718	0.173065	5.47339	4.41519e-08	1.53048e-06	Ptprv	processed_transcript
ENSMUSG00000028033	2358.1	1860.22	2855.98	-0.573933	0.0959905	-5.47281	4.42956e-08	1.53247e-06	Kcnq5	protein_coding
ENSMUSG00000039194	533.047	433.43	632.664	-0.572508	0.102744	-5.4702	4.49534e-08	1.5498e-06	Rlbp1	protein_coding
ENSMUSG00000034958	8965.87	7907.41	10024.3	-0.328635	0.0578371	-5.47013	4.49712e-08	1.5498e-06	Atcay	protein_coding
ENSMUSG00000001018	2336.3	2605.67	2066.93	0.341278	0.0606098	5.469	4.52584e-08	1.55668e-06	Snapin	protein_coding
ENSMUSG00000022186	27833.4	24752.1	30914.7	-0.302109	0.0532667	-5.46806	4.54999e-08	1.56196e-06	Oxct1	protein_coding
ENSMUSG00000033253	3394.39	3820.43	2968.35	0.361529	0.0637445	5.46278	4.68747e-08	1.60605e-06	Szt2	protein_coding
ENSMUSG00000038685	1744.36	1997.53	1491.19	0.389256	0.0673567	5.45651	4.85591e-08	1.66055e-06	Rtel1	protein_coding
ENSMUSG00000023495	4785.69	3987.58	5583.8	-0.50982	0.0911817	-5.45516	4.89294e-08	1.67e-06	Pcbp4	protein_coding
ENSMUSG00000041079	575.651	676.47	474.832	0.50049	0.0869155	5.45407	4.92288e-08	1.67699e-06	Rwdd2b	protein_coding
ENSMUSG00000053164	154.217	101.777	206.658	-0.887205	0.151644	-5.45271	4.96081e-08	1.68668e-06	Gpr21	protein_coding
ENSMUSG00000034616	1765.31	1513.03	2017.58	-0.432744	0.0770266	-5.45014	5.03304e-08	1.70796e-06	Ssh3	protein_coding
ENSMUSG00000113216	536.931	429.16	644.703	-0.581678	0.102073	-5.44615	5.14711e-08	1.74205e-06
ENSMUSG00000078786	770.662	905.557	635.767	0.512515	0.0900152	5.44594	5.15312e-08	1.74205e-06	BC024978	protein_coding
ENSMUSG00000029554	946.447	1144.11	748.784	0.604272	0.10688	5.4421	5.2657e-08	1.77672e-06	Mad1l1	protein_coding
ENSMUSG00000054428	6332.51	5310.37	7354.64	-0.510291	0.091802	-5.44113	5.29448e-08	1.78304e-06	Atpif1	protein_coding
ENSMUSG00000042055	3010.77	3453.24	2568.3	0.460598	0.0832285	5.43829	5.37941e-08	1.80526e-06	Wdr11	protein_coding
ENSMUSG00000039908	455.218	554.08	356.356	0.624996	0.110297	5.43825	5.38078e-08	1.80526e-06	Slc26a11	protein_coding
ENSMUSG00000047228	376.844	274.89	478.798	-0.718467	0.118446	-5.43469	5.48905e-08	1.83811e-06	A2ml1	protein_coding
ENSMUSG00000022211	6984.67	6008.59	7960.75	-0.402865	0.0710218	-5.43311	5.53801e-08	1.85101e-06	Carmil3	protein_coding
ENSMUSG00000031004	1108.58	795.709	1421.45	-0.729304	0.116943	-5.43074	5.61221e-08	1.87009e-06	Mki67	protein_coding
ENSMUSG00000067336	9397.56	8317.73	10477.4	-0.315367	0.0558741	-5.43061	5.61616e-08	1.87009e-06	Bmpr2	protein_coding
ENSMUSG00000029245	8342.58	7313.18	9371.99	-0.360077	0.0639726	-5.42923	5.65991e-08	1.88112e-06	Epha5	protein_coding
ENSMUSG00000020523	2280.74	2581.83	1979.65	0.374114	0.0660732	5.42771	5.70821e-08	1.89363e-06	Fam114a2	protein_coding
ENSMUSG00000034825	5580.22	4605.4	6555.03	-0.505591	0.0881637	-5.42613	5.75887e-08	1.90687e-06	Nrip3	protein_coding
ENSMUSG00000021486	2204.41	1931.69	2477.13	-0.39017	0.0705418	-5.42039	5.94697e-08	1.96549e-06	Prelid1	protein_coding
ENSMUSG00000035486	378.094	509.105	247.083	0.885713	0.150782	5.41776	6.03488e-08	1.99084e-06	Plk5	protein_coding
ENSMUSG00000055862	1096.63	946.593	1246.66	-0.441443	0.0804422	-5.41201	6.23215e-08	2.0483e-06	Izumo4	protein_coding
ENSMUSG00000028937	9139.22	7778	10500.4	-0.415357	0.0727284	-5.41207	6.23001e-08	2.0483e-06	Acot7	protein_coding
ENSMUSG00000027378	972.778	1149.96	795.597	0.499842	0.085931	5.41161	6.24593e-08	2.04903e-06	Nphp1	protein_coding
ENSMUSG00000024957	177.499	126.656	228.342	-0.769001	0.131543	-5.40773	6.38282e-08	2.09008e-06	Kcnk4	protein_coding
ENSMUSG00000056413	6559.94	5592.6	7527.27	-0.439505	0.0780859	-5.40681	6.41586e-08	2.09703e-06	Adap1	protein_coding
ENSMUSG00000030401	2750.7	2265.66	3235.73	-0.533799	0.0955182	-5.40394	6.51931e-08	2.12692e-06	Rtn2	protein_coding
ENSMUSG00000056656	83.6667	117.691	49.6429	0.995044	0.169599	5.40127	6.61713e-08	2.15488e-06	Apol8	protein_coding
ENSMUSG00000031840	18237.8	20369.4	16106.2	0.36803	0.0669155	5.39455	6.86972e-08	2.23304e-06	Rab3a	protein_coding
ENSMUSG00000068391	573.72	708.292	439.148	0.62176	0.10364	5.39289	6.9332e-08	2.24955e-06	Chrac1	protein_coding
ENSMUSG00000038398	1860	2097.33	1622.68	0.369433	0.0659359	5.39194	6.96992e-08	2.25734e-06	Upf3a	protein_coding
ENSMUSG00000022994	3366.02	3810.18	2921.87	0.38955	0.0696909	5.39144	6.9894e-08	2.25952e-06	Adcy6	protein_coding
ENSMUSG00000090841	3179.77	2797.01	3562.53	-0.383853	0.0698168	-5.39022	7.03716e-08	2.27083e-06	Myl6	protein_coding
ENSMUSG00000029552	197.817	148.084	247.55	-0.693994	0.120941	-5.38893	7.08798e-08	2.27894e-06	Tes	protein_coding
ENSMUSG00000022474	3293.89	2930.94	3656.84	-0.354945	0.0647959	-5.38907	7.08228e-08	2.27894e-06	Pmm1	protein_coding
ENSMUSG00000075020	402.78	307.932	497.627	-0.651242	0.111501	-5.38811	7.12029e-08	2.28519e-06		lincRNA
ENSMUSG00000027499	16982.3	13714.5	20250.1	-0.559641	0.0981292	-5.38743	7.14704e-08	2.28963e-06	Pkia	protein_coding
ENSMUSG00000020640	3358.73	2976.8	3740.67	-0.323196	0.057957	-5.38566	7.21781e-08	2.30814e-06	Itsn2	protein_coding
ENSMUSG00000005986	2674.61	2346.09	3003.12	-0.365758	0.0658625	-5.384	7.28489e-08	2.3254e-06	Ankrd13d	protein_coding
ENSMUSG00000036779	2387.14	2688.72	2085.57	0.36113	0.0645271	5.38253	7.34453e-08	2.33603e-06	Papd5	protein_coding
ENSMUSG00000097960	380.474	513.369	247.579	0.882373	0.161449	5.38267	7.3389e-08	2.33603e-06	A330074K22Rik	lincRNA
ENSMUSG00000031231	5964.88	5258.89	6670.87	-0.375738	0.0683444	-5.38126	7.3965e-08	2.34836e-06	Cox7b	protein_coding
ENSMUSG00000049047	572.241	450.601	693.881	-0.611901	0.107899	-5.37624	7.6058e-08	2.4062e-06	Armcx3	protein_coding
ENSMUSG00000027900	1401.27	1216.14	1586.4	-0.409574	0.0741591	-5.37627	7.60435e-08	2.4062e-06	Dram2	protein_coding
ENSMUSG00000052726	894.062	677.81	1110.31	-0.680869	0.118448	-5.37586	7.62194e-08	2.40702e-06	Kcnt2	protein_coding
ENSMUSG00000026223	14650.7	17201.4	12099.9	0.517225	0.0923268	5.37481	7.66616e-08	2.41668e-06	Itm2c	protein_coding
ENSMUSG00000028089	633.436	774.537	492.335	0.606038	0.102904	5.37323	7.73386e-08	2.4337e-06	Chd1l	protein_coding
ENSMUSG00000097801	261.559	329.154	193.965	0.694403	0.11789	5.36899	7.91771e-08	2.48714e-06		lincRNA
ENSMUSG00000054752	2229.03	1879.94	2578.13	-0.463811	0.0827455	-5.36523	8.08479e-08	2.53368e-06	Fsd1l	protein_coding
ENSMUSG00000027522	3414.26	3857.79	2970.73	0.381326	0.0685049	5.36501	8.0944e-08	2.53368e-06	Stx16	protein_coding
ENSMUSG00000020734	1145.9	963.189	1328.6	-0.486436	0.0885527	-5.36285	8.19193e-08	2.55969e-06	Grin2c	protein_coding
ENSMUSG00000030340	232.544	292.813	172.276	0.704265	0.121085	5.3592	8.35923e-08	2.60738e-06	Scnn1a	protein_coding
ENSMUSG00000022033	196.928	136.837	257.019	-0.798149	0.132804	-5.35669	8.47594e-08	2.63914e-06	Pbk	protein_coding
ENSMUSG00000027326	148.311	106.994	189.629	-0.750713	0.129612	-5.3548	8.56499e-08	2.6622e-06	Knl1	protein_coding
ENSMUSG00000041658	4556.87	3890.61	5223.13	-0.409374	0.0725521	-5.34972	8.8092e-08	2.73332e-06	Rragb	protein_coding
ENSMUSG00000024776	603.556	482.812	724.301	-0.554348	0.0963033	-5.34384	9.09981e-08	2.81856e-06	Stambpl1	protein_coding
ENSMUSG00000054409	354.529	272.766	436.291	-0.667695	0.120872	-5.33834	9.38006e-08	2.9003e-06	Tmem74	protein_coding
ENSMUSG00000104279	111.573	148.866	74.2801	0.869972	0.155934	5.33043	9.79787e-08	3.02422e-06		TEC
ENSMUSG00000069670	2655.57	2037.42	3273.72	-0.636472	0.10879	-5.32671	1.0001e-07	3.08155e-06	Nkain2	protein_coding
ENSMUSG00000020986	5743.52	5098.38	6388.66	-0.317462	0.0575392	-5.324	1.01509e-07	3.12234e-06	Sec23a	protein_coding
ENSMUSG00000036104	4025.88	4417.74	3634.03	0.329778	0.0615795	5.32262	1.02282e-07	3.14067e-06	Rab3gap1	protein_coding
ENSMUSG00000030609	674.784	572.409	777.158	-0.447173	0.0807786	-5.31926	1.04193e-07	3.1938e-06	Aen	protein_coding
ENSMUSG00000071103	369.926	450.243	289.61	0.587221	0.101014	5.31784	1.05004e-07	3.21313e-06	1700029J07Rik	protein_coding
ENSMUSG00000055436	11839.1	13283.3	10394.9	0.334735	0.0602623	5.3154	1.06425e-07	3.25099e-06	Srsf11	protein_coding
ENSMUSG00000007944	2532.13	2006.64	3057.63	-0.613186	0.111847	-5.3139	1.07303e-07	3.27219e-06	Ttc9b	protein_coding
ENSMUSG00000027525	5388.25	4785.51	5991	-0.331522	0.0606235	-5.30931	1.10042e-07	3.34996e-06	Phactr3	protein_coding
ENSMUSG00000063804	1294.96	1506.13	1083.8	0.468971	0.083916	5.30523	1.12528e-07	3.41977e-06	Lin28b	protein_coding
ENSMUSG00000007908	1475.31	1684.31	1266.31	0.408029	0.0735602	5.30453	1.12962e-07	3.42711e-06	Hmgcll1	protein_coding
ENSMUSG00000028883	1042.44	779.387	1305.49	-0.658148	0.109566	-5.29923	1.16293e-07	3.52213e-06	Sema3a	protein_coding
ENSMUSG00000026500	621.158	515.405	726.911	-0.498234	0.0896292	-5.29705	1.17691e-07	3.55625e-06	Cox20	protein_coding
ENSMUSG00000047921	2248	2641.56	1854.44	0.541848	0.102254	5.29685	1.1782e-07	3.55625e-06	Trappc9	protein_coding
ENSMUSG00000034220	4495.82	3921.9	5069.74	-0.371216	0.0674911	-5.29625	1.18205e-07	3.56181e-06	Gpc1	protein_coding
ENSMUSG00000045733	5006.65	4089.37	5923.93	-0.496068	0.0864133	-5.29342	1.20049e-07	3.61124e-06	Sprn	protein_coding
ENSMUSG00000053825	5876.7	4982.47	6770.94	-0.423748	0.075452	-5.29281	1.20454e-07	3.61729e-06	Ppfia2	protein_coding
ENSMUSG00000028222	4510.19	3402.51	5617.87	-0.621624	0.101686	-5.29115	1.21553e-07	3.64411e-06	Calb1	protein_coding
ENSMUSG00000045648	1228.63	982.349	1474.91	-0.554811	0.0968662	-5.29021	1.22178e-07	3.65669e-06	Vwc2l	protein_coding
ENSMUSG00000104411	79.85	114.037	45.6627	1.03431	0.171362	5.28726	1.24164e-07	3.70987e-06		lincRNA
ENSMUSG00000022043	6795.54	5992.67	7598.4	-0.316284	0.057232	-5.28667	1.24565e-07	3.71558e-06	Trim35	protein_coding
ENSMUSG00000046532	547.968	400.672	695.264	-0.685229	0.111484	-5.28558	1.25308e-07	3.73148e-06	Ar	protein_coding
ENSMUSG00000008601	31.5188	51.2027	11.8349	1.22853	0.206621	5.27159	1.35247e-07	4.0207e-06	Rab25	protein_coding
ENSMUSG00000014846	2007.23	1600.14	2414.31	-0.575974	0.103193	-5.26871	1.37386e-07	4.07585e-06	Tppp3	protein_coding
ENSMUSG00000022346	441.64	348.305	534.974	-0.571495	0.0995607	-5.26848	1.37561e-07	4.07585e-06	Myc	protein_coding
ENSMUSG00000036099	4372.91	3844.96	4900.86	-0.359768	0.0661036	-5.26422	1.40784e-07	4.16438e-06	Vezt	protein_coding
ENSMUSG00000097195	449.869	370.847	528.892	-0.529344	0.0976551	-5.26226	1.42298e-07	4.20217e-06	Snhg5	processed_transcript
ENSMUSG00000098128	242.264	338.707	145.82	0.980512	0.168399	5.25635	1.46944e-07	4.33217e-06		antisense
ENSMUSG00000087620	543.792	424.9	662.685	-0.593493	0.102963	-5.25568	1.47476e-07	4.34024e-06	5330434G04Rik	lincRNA
ENSMUSG00000086228	1045.84	1345.57	746.117	0.766293	0.137913	5.2554	1.47707e-07	4.34024e-06	Ubap1l	protein_coding
ENSMUSG00000056895	350.909	279.236	422.581	-0.60387	0.111727	-5.25472	1.48248e-07	4.34057e-06	Hist3h2ba	protein_coding
ENSMUSG00000011148	481.329	615.452	347.205	0.747568	0.133684	5.25449	1.48439e-07	4.34057e-06	Adssl1	protein_coding
ENSMUSG00000044279	59.9731	86.0232	33.9231	1.01285	0.180922	5.25447	1.48452e-07	4.34057e-06	Crb3	protein_coding
ENSMUSG00000053368	162.432	214.59	110.275	0.826606	0.139973	5.25387	1.48933e-07	4.34746e-06	Rxfp2	protein_coding
ENSMUSG00000026527	3508.75	3141.48	3876.03	-0.300671	0.0555696	-5.24718	1.54446e-07	4.501e-06	Rgs7	protein_coding
ENSMUSG00000005357	483.57	361.988	605.153	-0.672358	0.116624	-5.23803	1.62303e-07	4.72223e-06	Slc1a6	protein_coding
ENSMUSG00000029465	4257.21	3652.79	4861.64	-0.420029	0.0769568	-5.23681	1.63374e-07	4.74559e-06	Arpc3	protein_coding
ENSMUSG00000026322	208.03	154.971	261.088	-0.702954	0.125485	-5.22959	1.69886e-07	4.92649e-06	Htr4	protein_coding
ENSMUSG00000030536	2008.44	1745.66	2271.23	-0.361914	0.0660118	-5.2293	1.70156e-07	4.92649e-06	Iqgap1	protein_coding
ENSMUSG00000023367	731.163	848.246	614.08	0.444625	0.0801499	5.2239	1.75197e-07	5.06417e-06	Tmem176a	protein_coding
ENSMUSG00000103770	160.852	99.3467	222.358	-0.937727	0.144457	-5.21473	1.84081e-07	5.31231e-06	Pcdha9	protein_coding
ENSMUSG00000106981	456.66	537.908	375.413	0.503846	0.0911176	5.21154	1.87284e-07	5.39596e-06
ENSMUSG00000100600	518.994	432.307	605.681	-0.476652	0.0865415	-5.20889	1.89975e-07	5.46464e-06	A230077H06Rik	antisense
ENSMUSG00000035653	3629.68	3202.46	4056.89	-0.345238	0.064064	-5.20779	1.91099e-07	5.48806e-06	Lrfn5	protein_coding
ENSMUSG00000019066	586.967	441.705	732.229	-0.659268	0.113536	-5.20379	1.95263e-07	5.59858e-06	Rab3d	protein_coding
ENSMUSG00000023004	743.313	598.693	887.932	-0.551773	0.100003	-5.20323	1.95858e-07	5.6066e-06	Tuba1b	protein_coding
ENSMUSG00000009555	1875.06	2162.42	1587.69	0.434844	0.0791367	5.20264	1.96475e-07	5.6152e-06	Cdk9	protein_coding
ENSMUSG00000015016	833.875	977.501	690.249	0.478933	0.0861031	5.20176	1.97406e-07	5.62369e-06	Acsf3	protein_coding
ENSMUSG00000024766	482.867	575.851	389.882	0.550277	0.100067	5.20188	1.9728e-07	5.62369e-06	Lipo3	protein_coding
ENSMUSG00000059898	132.504	75.5998	189.408	-1.01201	0.181902	-5.1956	2.04066e-07	5.80411e-06	Dsc3	protein_coding
ENSMUSG00000033952	264.557	192.877	336.237	-0.715672	0.124199	-5.17774	2.24589e-07	6.37762e-06	Aspm	protein_coding
ENSMUSG00000036427	16442.2	14334.9	18549.5	-0.35789	0.0659805	-5.1759	2.26819e-07	6.43065e-06	Gpi1	protein_coding
ENSMUSG00000037344	1411.8	1631.78	1191.82	0.464018	0.0864074	5.17349	2.29758e-07	6.50357e-06	Slc12a9	protein_coding
ENSMUSG00000028069	823.955	704.132	943.778	-0.427309	0.0793149	-5.17228	2.3125e-07	6.52798e-06	Gpatch4	protein_coding
ENSMUSG00000089889	138.455	182.24	94.6703	0.816625	0.14025	5.1722	2.31356e-07	6.52798e-06	0610040B10Rik	antisense
ENSMUSG00000019817	2575.7	2930.91	2220.49	0.466752	0.0919946	5.17146	2.32276e-07	6.54355e-06	Plagl1	protein_coding
ENSMUSG00000006930	28176.7	32331.3	24022.1	0.465912	0.0892873	5.16755	2.37177e-07	6.67102e-06	Hap1	protein_coding
ENSMUSG00000039474	3427.92	4114.17	2741.66	0.581514	0.108394	5.16272	2.43391e-07	6.83498e-06	Wfs1	protein_coding
ENSMUSG00000032254	217.092	158.695	275.49	-0.716338	0.126212	-5.15927	2.4791e-07	6.94393e-06	Kif23	protein_coding
ENSMUSG00000021179	704.724	809.454	599.995	0.432279	0.0801624	5.15894	2.48357e-07	6.94393e-06	Nrde2	protein_coding
ENSMUSG00000044934	731.754	847.469	616.04	0.451554	0.0829968	5.15887	2.48445e-07	6.94393e-06	Zfp367	protein_coding
ENSMUSG00000036941	1665.03	1874.43	1455.64	0.369583	0.0691931	5.15291	2.56481e-07	7.14603e-06	Elac1	protein_coding
ENSMUSG00000030987	3703.69	4136.43	3270.95	0.376054	0.071936	5.15306	2.56274e-07	7.14603e-06	Stim1	protein_coding
ENSMUSG00000025400	339.59	436.168	243.012	0.759322	0.135807	5.15196	2.57777e-07	7.1709e-06	Tac2	protein_coding
ENSMUSG00000052291	325.648	394.312	256.984	0.563832	0.0994808	5.15078	2.59412e-07	7.20507e-06		pseudogene
ENSMUSG00000036752	4167.53	3595.38	4739.68	-0.374898	0.0689151	-5.14941	2.6131e-07	7.24646e-06	Tubb4b	protein_coding
ENSMUSG00000056306	1542.9	1178.16	1907.64	-0.625354	0.108107	-5.14764	2.63778e-07	7.30349e-06	Sertm1	protein_coding
ENSMUSG00000074652	530.577	661.881	399.273	0.689389	0.129821	5.14095	2.73348e-07	7.55667e-06	Myh7b	protein_coding
ENSMUSG00000030844	1721.9	1501.14	1942.66	-0.400009	0.0759709	-5.13976	2.75084e-07	7.58473e-06	Rgs10	protein_coding
ENSMUSG00000054676	1570.27	1765.24	1375.3	0.384125	0.0729262	5.13967	2.75218e-07	7.58473e-06	1600014C10Rik	protein_coding
ENSMUSG00000053134	785.342	910.367	660.318	0.489316	0.0929892	5.13923	2.75864e-07	7.59074e-06	Supt7l	protein_coding
ENSMUSG00000022295	8335.56	9082.13	7589	0.279583	0.0534799	5.13644	2.79985e-07	7.69221e-06	Atp6v1c1	protein_coding
ENSMUSG00000017446	240.885	296.227	185.544	0.662589	0.131109	5.13531	2.81675e-07	7.72669e-06	C1qtnf1	protein_coding
ENSMUSG00000074794	1549.76	1287.36	1812.16	-0.494097	0.0915144	-5.1348	2.82439e-07	7.7357e-06	Arrdc3	protein_coding
ENSMUSG00000040037	13454	11389.7	15518.3	-0.39413	0.0710915	-5.13216	2.8643e-07	7.82299e-06	Negr1	protein_coding
ENSMUSG00000015749	4262.03	3740.41	4783.65	-0.33016	0.0612981	-5.13211	2.86508e-07	7.82299e-06	Anp32e	protein_coding
ENSMUSG00000042340	132.56	179.248	85.8716	0.876524	0.146541	5.13151	2.8742e-07	7.83584e-06	Ctf1	protein_coding
ENSMUSG00000003421	1672.23	1944.71	1399.76	0.460743	0.0846375	5.13047	2.89018e-07	7.86731e-06	Nosip	protein_coding
ENSMUSG00000034684	994.167	1263.61	724.728	0.715438	0.126536	5.12781	2.93135e-07	7.96716e-06	Sema3f	protein_coding
ENSMUSG00000097321	110.701	145.407	75.996	0.810131	0.143844	5.12334	3.00163e-07	8.1457e-06	1700028E10Rik	processed_transcript
ENSMUSG00000028367	2843.53	2468.79	3218.27	-0.4073	0.0772642	-5.11961	3.06171e-07	8.29605e-06	Txn1	protein_coding
ENSMUSG00000107318	133.475	177.71	89.2406	0.837417	0.144509	5.11781	3.09102e-07	8.3627e-06	Gm30003
ENSMUSG00000102995	109.649	79.2861	140.011	-0.758691	0.145127	-5.11666	3.10999e-07	8.40124e-06		TEC
ENSMUSG00000001248	5498.21	4794.09	6202.33	-0.381151	0.072018	-5.11477	3.1413e-07	8.47292e-06	Gramd1a	protein_coding
ENSMUSG00000025875	1092.67	884.791	1300.55	-0.552639	0.103591	-5.1136	3.1607e-07	8.51231e-06	Tspan17	protein_coding
ENSMUSG00000045294	2129.48	1800.95	2458.02	-0.457336	0.0860358	-5.11295	3.17161e-07	8.52875e-06	Insig1	protein_coding
ENSMUSG00000079469	1276.88	1455.05	1098.71	0.40963	0.0770213	5.10959	3.22867e-07	8.66905e-06	Pigb	protein_coding
ENSMUSG00000070305	215.039	273.986	156.091	0.730099	0.129628	5.10737	3.26678e-07	8.75814e-06	Mpzl3	protein_coding
ENSMUSG00000029177	221.526	163.411	279.642	-0.722273	0.136176	-5.10657	3.28051e-07	8.78169e-06	Cenpa	protein_coding
ENSMUSG00000022768	217.19	162.721	271.659	-0.696559	0.133092	-5.10612	3.28845e-07	8.78968e-06	Ccdc116	protein_coding
ENSMUSG00000035048	1092.49	1264.64	920.35	0.406399	0.0736331	5.10459	3.31505e-07	8.84743e-06	Anapc13	protein_coding
ENSMUSG00000031835	4969.98	5478	4461.97	0.310351	0.0593805	5.10354	3.33356e-07	8.88349e-06	Mbtps1	protein_coding
ENSMUSG00000039556	219.416	281.03	157.802	0.70893	0.118704	5.10252	3.35152e-07	8.91797e-06	Ppp1r3f	protein_coding
ENSMUSG00000036251	105.397	149.588	61.2063	1.00789	0.164267	5.10158	3.36828e-07	8.94915e-06	Trpm8	protein_coding
ENSMUSG00000032564	2374.42	1960.92	2787.92	-0.493593	0.0908852	-5.09965	3.40277e-07	9.02725e-06	Cpne4	protein_coding
ENSMUSG00000021939	15740.5	17118	14363.1	0.275339	0.0531511	5.0985	3.42349e-07	9.05725e-06	Ctsb	protein_coding
ENSMUSG00000045284	2310.63	2580.79	2040.47	0.416806	0.0837276	5.09846	3.42428e-07	9.05725e-06	Dcaf12l1	protein_coding
ENSMUSG00000001157	1689.59	1496.38	1882.81	-0.330708	0.0627329	-5.0925	3.5338e-07	9.33302e-06	Gmcl1	protein_coding
ENSMUSG00000049571	844.069	1007.06	681.077	0.538294	0.0983975	5.09104	3.56104e-07	9.37706e-06	Cfap46	protein_coding
ENSMUSG00000028487	120.905	168.031	73.7786	0.905175	0.182263	5.0913	3.55621e-07	9.37706e-06	Bnc2	protein_coding
ENSMUSG00000025758	297.343	227.042	367.643	-0.619213	0.108077	-5.08597	3.65744e-07	9.61662e-06	Plk4	protein_coding
ENSMUSG00000019874	12072.9	9559.4	14586.5	-0.585191	0.10683	-5.08333	3.70871e-07	9.73701e-06	Fabp7	protein_coding
ENSMUSG00000022414	1414.98	1599.68	1230.29	0.378408	0.0713845	5.0812	3.75057e-07	9.83236e-06	Tab1	protein_coding
ENSMUSG00000109857	61.1763	35.6697	86.6829	-0.967902	0.184087	-5.08073	3.7598e-07	9.84203e-06
ENSMUSG00000005161	7498.07	6651.44	8344.7	-0.362224	0.0700072	-5.07609	3.85284e-07	1.00707e-05	Prdx2	protein_coding
ENSMUSG00000024944	1685.2	1922.41	1448	0.380855	0.0706429	5.0757	3.86067e-07	1.00763e-05	Arl2	protein_coding
ENSMUSG00000103707	134.676	88.8237	180.528	-0.863697	0.150949	-5.07003	3.97745e-07	1.03659e-05	Pcdha6	protein_coding
ENSMUSG00000035095	542.476	643.935	441.016	0.556399	0.106314	5.06923	3.9942e-07	1.03943e-05	Fam167a	protein_coding
ENSMUSG00000027978	364.641	260.097	469.185	-0.765608	0.142595	-5.06871	4.00511e-07	1.04074e-05	Prss12	protein_coding
ENSMUSG00000058589	10010.5	8863.85	11157.2	-0.305064	0.0575138	-5.06707	4.03993e-07	1.04826e-05	Anks1b	protein_coding
ENSMUSG00000108477	104.171	138.22	70.1225	0.836994	0.151084	5.06192	4.15053e-07	1.07538e-05
ENSMUSG00000021721	628.762	515.405	742.12	-0.498595	0.0915954	-5.06026	4.18679e-07	1.08319e-05	Htr1a	protein_coding
ENSMUSG00000045007	1507.73	1700.28	1315.18	0.385866	0.0739803	5.0564	4.27249e-07	1.10215e-05	Tubg2	protein_coding
ENSMUSG00000021311	1625.53	1854.47	1396.6	0.436289	0.0843919	5.05649	4.27051e-07	1.10215e-05	Mtr	protein_coding
ENSMUSG00000021719	8941.81	7386.47	10497.1	-0.491068	0.091129	-5.05279	4.35407e-07	1.12157e-05	Rgs7bp	protein_coding
ENSMUSG00000020330	164.358	118.282	210.434	-0.751823	0.137948	-5.05211	4.36953e-07	1.12174e-05	Hmmr	protein_coding
ENSMUSG00000097974	228.134	180.573	275.696	-0.60023	0.114253	-5.05246	4.36164e-07	1.12174e-05		lincRNA
ENSMUSG00000043498	2480.48	2039.25	2921.72	-0.510538	0.0950436	-5.05193	4.37371e-07	1.12174e-05		pseudogene
ENSMUSG00000022639	514.477	399.209	629.745	-0.5872	0.104204	-5.04751	4.47595e-07	1.14631e-05		lincRNA
ENSMUSG00000042354	1416.29	1204.49	1628.09	-0.43974	0.0832712	-5.0462	4.50684e-07	1.15256e-05	Gnl3	protein_coding
ENSMUSG00000040852	760.854	868.041	653.667	0.412625	0.0786743	5.03673	4.73553e-07	1.2093e-05	Plekhh2	protein_coding
ENSMUSG00000024691	292.214	232.191	352.237	-0.57092	0.105679	-5.0356	4.76356e-07	1.21471e-05	Fam111a	protein_coding
ENSMUSG00000026114	67.9153	93.9878	41.8427	0.93606	0.167612	5.03422	4.79804e-07	1.22174e-05	Cnga3	protein_coding
ENSMUSG00000012443	338.824	258.377	419.271	-0.638755	0.11517	-5.03388	4.80646e-07	1.22214e-05	Kif11	protein_coding
ENSMUSG00000033983	1079.58	1227.45	931.704	0.397206	0.0757302	5.02746	4.97016e-07	1.26195e-05	Coil	protein_coding
ENSMUSG00000057561	1883.74	1566.26	2201.22	-0.478507	0.0893258	-5.02707	4.98022e-07	1.2627e-05	Eif1a	protein_coding
ENSMUSG00000028779	1460.67	1645.53	1275.8	0.369562	0.0707304	5.02423	5.05459e-07	1.27973e-05	Pef1	protein_coding
ENSMUSG00000084898	238.843	173.987	303.699	-0.706178	0.123974	-5.01914	5.19029e-07	1.31221e-05		lincRNA
ENSMUSG00000035200	127.12	170.328	83.9129	0.851464	0.161919	5.0176	5.23198e-07	1.32087e-05	Chrnb4	protein_coding
ENSMUSG00000042182	9088.05	8079.87	10096.2	-0.36842	0.0728635	-5.01577	5.28228e-07	1.33111e-05	Bend6	protein_coding
ENSMUSG00000043621	254.464	312.964	195.964	0.617755	0.11214	5.01557	5.28752e-07	1.33111e-05	Ubxn10	protein_coding
ENSMUSG00000038618	115.183	155.059	75.3069	0.863446	0.146076	5.01293	5.36061e-07	1.34759e-05	Rassf7	protein_coding
ENSMUSG00000036790	1496.77	1262.59	1730.96	-0.427494	0.0796667	-5.00942	5.45935e-07	1.37048e-05	Slitrk2	protein_coding
ENSMUSG00000026156	2048.84	1797.54	2300.15	-0.357688	0.0687223	-5.00901	5.47119e-07	1.37151e-05	B3gat2	protein_coding
ENSMUSG00000034796	5272.64	3876.78	6668.5	-0.710526	0.128114	-5.00871	5.47954e-07	1.37166e-05	Cpne7	protein_coding
ENSMUSG00000070695	2866.17	2360.87	3371.47	-0.438033	0.0787843	-5.00724	5.52158e-07	1.38024e-05	Cntnap5a	protein_coding
ENSMUSG00000021470	1827.15	2066.12	1588.17	0.389246	0.0750203	5.00445	5.60226e-07	1.39844e-05	Ercc6l2	protein_coding
ENSMUSG00000091586	175.026	222.158	127.894	0.707079	0.126264	5.00384	5.61992e-07	1.40087e-05	Cyp4f17	protein_coding
ENSMUSG00000042708	252.702	311.159	194.245	0.617103	0.111972	4.99688	5.82662e-07	1.45036e-05	Shcbp1l	protein_coding
ENSMUSG00000020290	6674.28	5794.97	7553.59	-0.355233	0.0671658	-4.995	5.88347e-07	1.46246e-05	Xpo1	protein_coding
ENSMUSG00000034799	12980	11027.1	14932.8	-0.404159	0.0755156	-4.99418	5.90868e-07	1.46668e-05	Unc13a	protein_coding
ENSMUSG00000046711	441.003	535.638	346.367	0.573797	0.104483	4.99353	5.92842e-07	1.46952e-05	Hmga1	protein_coding
ENSMUSG00000044067	1590.14	1232.35	1947.94	-0.630243	0.117562	-4.9921	5.9727e-07	1.47843e-05	Gpr22	protein_coding
ENSMUSG00000011256	1458.84	1112.94	1804.74	-0.626936	0.112893	-4.98959	6.05061e-07	1.49563e-05	Adam19	protein_coding
ENSMUSG00000029119	1071.56	1254.72	888.403	0.481815	0.0907937	4.9879	6.10388e-07	1.5067e-05	Man2b2	protein_coding
ENSMUSG00000021098	883.508	1061.56	705.459	0.542292	0.0990941	4.98611	6.1606e-07	1.51859e-05	4930447C04Rik	protein_coding
ENSMUSG00000031755	1586.34	1802.69	1369.99	0.391547	0.0750131	4.98304	6.25914e-07	1.5386e-05	Bbs2	protein_coding
ENSMUSG00000026644	84.6116	113.579	55.6441	0.859014	0.162236	4.98312	6.25681e-07	1.5386e-05	Acbd7	protein_coding
ENSMUSG00000036882	6146.98	4630.13	7663.84	-0.671117	0.124687	-4.98047	6.34286e-07	1.55335e-05	Arhgap33	protein_coding
ENSMUSG00000031283	403.973	306.005	501.942	-0.670384	0.126192	-4.98072	6.33475e-07	1.55335e-05	Chrdl1	protein_coding
ENSMUSG00000071753	524.229	400.675	647.783	-0.646892	0.119076	-4.98013	6.35413e-07	1.55335e-05	C230004F18Rik	processed_transcript
ENSMUSG00000006522	1288.89	1589.99	987.788	0.617978	0.111113	4.98028	6.34934e-07	1.55335e-05	Itih3	protein_coding
ENSMUSG00000087075	223.386	291.245	155.526	0.783609	0.139215	4.97969	6.36862e-07	1.55475e-05	Lbhd2	protein_coding
ENSMUSG00000103092	161.541	112.07	211.013	-0.774039	0.131996	-4.97872	6.40051e-07	1.56039e-05	Pcdha5	protein_coding
ENSMUSG00000053477	10135.7	7997.06	12274.3	-0.599471	0.112892	-4.97723	6.45022e-07	1.57035e-05	Tcf4	protein_coding
ENSMUSG00000063354	51.7114	72.345	31.0778	0.942909	0.179213	4.9755	6.50793e-07	1.58223e-05	Slc39a4	protein_coding
ENSMUSG00000060548	3352.52	2837.32	3867.72	-0.442435	0.0844401	-4.97489	6.52835e-07	1.58286e-05	Tnfrsf19	protein_coding
ENSMUSG00000028860	48.0753	68.14	28.0105	0.976072	0.182858	4.97505	6.52317e-07	1.58286e-05	Sytl1	protein_coding
ENSMUSG00000027282	4443.38	3982.04	4904.72	-0.31663	0.0620707	-4.97032	6.68437e-07	1.61847e-05	Mtch2	protein_coding
ENSMUSG00000060510	2803.55	2462.5	3144.6	-0.362624	0.0704331	-4.96982	6.70156e-07	1.62043e-05	Zfp266	protein_coding
ENSMUSG00000041324	301.744	216.75	386.739	-0.749407	0.139749	-4.96746	6.7835e-07	1.63801e-05	Inhba	protein_coding
ENSMUSG00000025213	78.5766	113.456	43.6974	1.02167	0.182267	4.963	6.94135e-07	1.67385e-05	Kazald1	protein_coding
ENSMUSG00000021948	1389.07	1183.4	1594.74	-0.402288	0.0759083	-4.96246	6.96057e-07	1.67393e-05	Prkcd	protein_coding
ENSMUSG00000040543	3303	3753.58	2852.42	0.432164	0.0861763	4.96268	6.95259e-07	1.67393e-05	Pitpnm3	protein_coding
ENSMUSG00000041460	183.414	230.126	136.703	0.691643	0.13097	4.96029	7.03877e-07	1.69045e-05	Cacna2d4	protein_coding
ENSMUSG00000018411	21788.8	18369.9	25207.8	-0.419119	0.0785176	-4.95347	7.29016e-07	1.74846e-05	Mapt	protein_coding
ENSMUSG00000022761	4823.54	4216.78	5430.3	-0.370506	0.0718893	-4.95267	7.32004e-07	1.75325e-05	Lztr1	protein_coding
ENSMUSG00000021514	1216.74	1048.14	1385.33	-0.393506	0.0756275	-4.95064	7.39705e-07	1.76931e-05	Zfp369	protein_coding
ENSMUSG00000033430	2256.89	2519.97	1993.81	0.369696	0.0733994	4.9503	7.41005e-07	1.77003e-05	Terf2ip	protein_coding
ENSMUSG00000035960	1346.2	1166.04	1526.37	-0.389241	0.0753078	-4.94736	7.52255e-07	1.79449e-05	Apex1	protein_coding
ENSMUSG00000030104	1172.25	1002.24	1342.26	-0.4106	0.0787889	-4.94563	7.58985e-07	1.80812e-05	Edem1	protein_coding
ENSMUSG00000024276	2539.86	2248.95	2830.77	-0.339181	0.0663455	-4.94198	7.73326e-07	1.83981e-05	Zfp397	protein_coding
ENSMUSG00000025551	1546.46	1299.84	1793.09	-0.456076	0.0870704	-4.94149	7.75264e-07	1.84195e-05	Fgf14	protein_coding
ENSMUSG00000030554	2051.56	1624.99	2478.12	-0.519308	0.0921895	-4.94069	7.78449e-07	1.84705e-05	Synm	protein_coding
ENSMUSG00000020589	9345.08	7586.69	11103.5	-0.515772	0.0959119	-4.93979	7.82059e-07	1.85066e-05	Fam49a	protein_coding
ENSMUSG00000063887	3868.35	3356.85	4379.85	-0.376345	0.0725144	-4.93997	7.81351e-07	1.85066e-05	Nlgn1	protein_coding
ENSMUSG00000085307	31.8727	49.5521	14.1934	1.10122	0.204957	4.93889	7.8569e-07	1.85678e-05		antisense
ENSMUSG00000018293	3632.94	3200.19	4065.69	-0.368802	0.072904	-4.93743	7.916e-07	1.86826e-05	Pfn1	protein_coding
ENSMUSG00000032368	5306.1	6310.41	4301.79	0.517008	0.096099	4.93486	8.02084e-07	1.89049e-05	Zic1	protein_coding
ENSMUSG00000071369	1068.3	895.189	1241.41	-0.434321	0.0816057	-4.93407	8.0532e-07	1.89058e-05	Map3k5	protein_coding
ENSMUSG00000046994	1668.64	1438.7	1898.57	-0.402917	0.0780334	-4.93427	8.04503e-07	1.89058e-05	Mars2	protein_coding
ENSMUSG00000048310	516.747	597.506	435.987	0.457288	0.0886472	4.93418	8.04885e-07	1.89058e-05	Pskh1	protein_coding
ENSMUSG00000029838	25080.2	22413.9	27746.6	-0.329951	0.0652689	-4.93316	8.09084e-07	1.89691e-05	Ptn	protein_coding
ENSMUSG00000078816	5362.84	4120.91	6604.77	-0.614044	0.11113	-4.93205	8.13692e-07	1.9052e-05	Prkcg	protein_coding
ENSMUSG00000104597	6864.39	5750.66	7978.12	-0.454423	0.0862871	-4.92937	8.24962e-07	1.92904e-05
ENSMUSG00000091337	12430.1	10922.5	13937.7	-0.375597	0.0740627	-4.92804	8.30592e-07	1.93827e-05	Eid1	protein_coding
ENSMUSG00000007837	314.477	373.821	255.132	0.534073	0.101945	4.92792	8.31091e-07	1.93827e-05	Prrg2	protein_coding
ENSMUSG00000028158	952.817	1140.42	765.214	0.573662	0.112605	4.92667	8.36427e-07	1.94815e-05	Mttp	protein_coding
ENSMUSG00000041540	1602.81	1381.41	1824.2	-0.357333	0.0678414	-4.92475	8.44664e-07	1.96476e-05	Sox5	protein_coding
ENSMUSG00000040174	558.047	662.46	453.634	0.492476	0.0909814	4.92308	8.51925e-07	1.97905e-05	Alkbh3	protein_coding
ENSMUSG00000036395	121.986	158.149	85.8238	0.77622	0.146508	4.92198	8.56729e-07	1.98761e-05	Glb1l2	protein_coding
ENSMUSG00000097796	109.671	74.1914	145.151	-0.818948	0.145058	-4.91456	8.8984e-07	2.05904e-05	Gm16702	lincRNA
ENSMUSG00000097032	137.687	177.416	97.9577	0.756935	0.141444	4.91481	8.88697e-07	2.05904e-05	4930539J05Rik	antisense
ENSMUSG00000031212	506.199	332.972	679.426	-0.847579	0.142091	-4.91081	9.07008e-07	2.09604e-05	Pgr15l	protein_coding
ENSMUSG00000029546	125.249	181.504	68.995	0.972017	0.193207	4.90983	9.11561e-07	2.10382e-05	Uncx	protein_coding
ENSMUSG00000041992	4785.07	4219.5	5350.64	-0.300952	0.0580374	-4.90795	9.20327e-07	2.12129e-05	Rapgef5	protein_coding
ENSMUSG00000034121	387.243	463.311	311.175	0.523049	0.0972661	4.90696	9.24967e-07	2.12922e-05	Mks1	protein_coding
ENSMUSG00000041679	88.975	118.874	59.0758	0.847208	0.156167	4.905	9.34262e-07	2.14783e-05	Lrrc29	protein_coding
ENSMUSG00000036769	943.233	810.53	1075.94	-0.403043	0.0781226	-4.90428	9.3772e-07	2.15299e-05	Wdr44	protein_coding
ENSMUSG00000060038	1176.46	965.612	1387.32	-0.520792	0.100865	-4.90256	9.45939e-07	2.16347e-05	Dhps	protein_coding
ENSMUSG00000026678	9129.65	7408.65	10850.7	-0.520011	0.0979937	-4.9026	9.45779e-07	2.16347e-05	Rgs5	protein_coding
ENSMUSG00000034110	769.573	657.03	882.115	-0.416565	0.0808124	-4.90299	9.43884e-07	2.16347e-05	Kctd7	protein_coding
ENSMUSG00000021928	704.936	603.298	806.574	-0.438201	0.0869196	-4.89409	9.87636e-07	2.25593e-05	Ebpl	protein_coding
ENSMUSG00000070802	18003.5	20540.2	15466.8	0.477967	0.104278	4.88746	1.02143e-06	2.33012e-05	Pnmal2	protein_coding
ENSMUSG00000033774	106.918	76.5451	137.291	-0.755951	0.150347	-4.88623	1.02783e-06	2.34172e-05	Npbwr1	protein_coding
ENSMUSG00000004451	1357.03	1170.91	1543.15	-0.387404	0.0752859	-4.88404	1.03933e-06	2.36185e-05	Ralb	protein_coding
ENSMUSG00000027381	416.585	484.29	348.879	0.474662	0.09294	4.88408	1.0391e-06	2.36185e-05	Bcl2l11	protein_coding
ENSMUSG00000029126	15149.6	13618.8	16680.4	-0.301232	0.0600023	-4.88253	1.04733e-06	2.37698e-05	Nsg1	protein_coding
ENSMUSG00000062257	10590.5	9190.55	11990.4	-0.376289	0.0732988	-4.88188	1.05081e-06	2.38184e-05	Opcml	protein_coding
ENSMUSG00000051951	2693.55	2161.45	3225.66	-0.561209	0.107456	-4.88015	1.06007e-06	2.39975e-05	Xkr4	protein_coding
ENSMUSG00000038530	9812.85	7974.81	11650.9	-0.504837	0.0943659	-4.87751	1.07434e-06	2.42279e-05	Rgs4	protein_coding
ENSMUSG00000007850	12953.2	11840.8	14065.6	-0.257823	0.0517401	-4.87767	1.07346e-06	2.42279e-05	Hnrnph1	protein_coding
ENSMUSG00000028973	1678.63	1909.59	1447.68	0.40279	0.0791372	4.87776	1.07297e-06	2.42279e-05	Abcb8	protein_coding
ENSMUSG00000042506	12761.4	10992.3	14530.4	-0.365432	0.0701047	-4.87577	1.08384e-06	2.44112e-05	Usp22	protein_coding
ENSMUSG00000044288	5476.5	4352.44	6600.56	-0.555292	0.103289	-4.87115	1.10951e-06	2.49547e-05	Cnr1	protein_coding
ENSMUSG00000033377	795.997	667.644	924.351	-0.462861	0.0899544	-4.87092	1.11079e-06	2.49547e-05	Palmd	protein_coding
ENSMUSG00000097403	68.4238	93.7458	43.1017	0.897234	0.168697	4.86963	1.11806e-06	2.50863e-05	9230116N13Rik	lincRNA
ENSMUSG00000005043	396.677	468.825	324.53	0.55018	0.112953	4.86898	1.12177e-06	2.51379e-05	Sgsh	protein_coding
ENSMUSG00000071757	705.542	602.051	809.033	-0.408917	0.079315	-4.86669	1.13484e-06	2.53987e-05	Zhx2	protein_coding
ENSMUSG00000073988	412.639	332.817	492.461	-0.514258	0.0963274	-4.86417	1.14941e-06	2.56923e-05	Ttpa	protein_coding
ENSMUSG00000024777	6409.79	5694.56	7125.01	-0.320259	0.0634315	-4.86345	1.15356e-06	2.57403e-05	Ppp2r5b	protein_coding
ENSMUSG00000021943	492.536	574.083	410.99	0.50756	0.103263	4.8633	1.15446e-06	2.57403e-05	Gdf10	protein_coding
ENSMUSG00000030000	8788.6	7343.58	10233.6	-0.426953	0.0803285	-4.86233	1.16009e-06	2.58335e-05	Add2	protein_coding
ENSMUSG00000033788	290.222	213.453	366.991	-0.687327	0.126196	-4.86205	1.16174e-06	2.58379e-05	Dysf	protein_coding
ENSMUSG00000028607	327.522	389.819	265.225	0.540249	0.10552	4.86142	1.16549e-06	2.58887e-05	Cpt2	protein_coding
ENSMUSG00000045518	157.954	207.703	108.205	0.806607	0.159907	4.86098	1.16806e-06	2.59134e-05	Onecut3	protein_coding
ENSMUSG00000031422	7190.35	6409.51	7971.19	-0.301678	0.0595974	-4.85965	1.17595e-06	2.60558e-05	Morf4l2	protein_coding
ENSMUSG00000018589	2593.55	2183.84	3003.26	-0.44837	0.0867939	-4.85839	1.18343e-06	2.61564e-05	Glra2	protein_coding
ENSMUSG00000003153	6842.75	5820.06	7865.44	-0.353378	0.0663643	-4.85846	1.18299e-06	2.61564e-05	Slc2a3	protein_coding
ENSMUSG00000045259	165.401	211.16	119.641	0.727031	0.136821	4.85662	1.19407e-06	2.63586e-05	Klhdc9	protein_coding
ENSMUSG00000061650	1522.63	1698.08	1347.18	0.33774	0.0671469	4.85628	1.19611e-06	2.6371e-05	Med9	protein_coding
ENSMUSG00000104033	221.044	154.484	287.604	-0.784505	0.147671	-4.85518	1.20276e-06	2.64846e-05		TEC
ENSMUSG00000020814	669.086	797.296	540.877	0.547155	0.107477	4.85417	1.20889e-06	2.65866e-05	Mxra7	protein_coding
ENSMUSG00000044646	543.395	641.11	445.68	0.5188	0.102224	4.84898	1.24097e-06	2.72583e-05	Zbtb7c	protein_coding
ENSMUSG00000040373	2215.52	2546.33	1884.71	0.393661	0.0754269	4.8482	1.24586e-06	2.73319e-05	Cacng5	protein_coding
ENSMUSG00000058355	5904.97	5245.51	6564.44	-0.324696	0.0645596	-4.8459	1.26038e-06	2.76164e-05	Abce1	protein_coding
ENSMUSG00000057778	450.451	515.538	385.363	0.445951	0.0900864	4.8452	1.26484e-06	2.76798e-05	Cyb5d2	protein_coding
ENSMUSG00000048978	6628.44	5806.3	7450.58	-0.375082	0.0748536	-4.84388	1.27328e-06	2.78303e-05	Nrsn1	protein_coding
ENSMUSG00000086181	187.956	140.818	235.094	-0.659156	0.122554	-4.842	1.28537e-06	2.80599e-05		processed_transcript
ENSMUSG00000005087	286.5	224.86	348.14	-0.59763	0.116326	-4.83999	1.29847e-06	2.8233e-05	Cd44	protein_coding
ENSMUSG00000041073	2704.96	2159.33	3250.58	-0.552707	0.10581	-4.83981	1.29966e-06	2.8233e-05	Nacad	protein_coding
ENSMUSG00000039106	620.787	520.05	721.523	-0.4356	0.0834186	-4.84007	1.29795e-06	2.8233e-05	Htr5a	protein_coding
ENSMUSG00000036438	26090.8	22459.8	29721.8	-0.417135	0.0827748	-4.84044	1.29553e-06	2.8233e-05	Calm2	protein_coding
ENSMUSG00000030235	3981.59	3339.79	4623.39	-0.422132	0.080144	-4.8391	1.30431e-06	2.82993e-05	Slco1c1	protein_coding
ENSMUSG00000066643	2645.24	2913.08	2377.39	0.338019	0.0694574	4.83784	1.31259e-06	2.84442e-05	Wdr35	protein_coding
ENSMUSG00000030704	19597.4	16957.4	22237.4	-0.369156	0.0719823	-4.83531	1.32939e-06	2.87732e-05	Rab6a	protein_coding
ENSMUSG00000035829	1976.28	2218.69	1733.87	0.365541	0.0731612	4.83259	1.34766e-06	2.91331e-05	Ppp1r26	protein_coding
ENSMUSG00000021250	627.993	771.041	484.945	0.64622	0.137591	4.83017	1.36414e-06	2.94535e-05	Fos	protein_coding
ENSMUSG00000002102	4310.2	3904.57	4715.82	-0.296072	0.060135	-4.82878	1.37374e-06	2.96247e-05	Psmc3	protein_coding
ENSMUSG00000030443	472.691	394.816	550.566	-0.498273	0.100441	-4.82647	1.38977e-06	2.99339e-05	Zfp583	protein_coding
ENSMUSG00000014850	1944.55	2165.78	1723.33	0.333452	0.0667673	4.82375	1.40884e-06	3.0308e-05	Msh3	protein_coding
ENSMUSG00000057176	356.087	434.605	277.569	0.596821	0.11368	4.82304	1.41385e-06	3.0379e-05	Ccdc189	protein_coding
ENSMUSG00000097131	230.427	287.246	173.609	0.657402	0.123534	4.82276	1.41587e-06	3.03856e-05		lincRNA
ENSMUSG00000020218	134.97	166.887	103.053	0.665018	0.145102	4.82181	1.42261e-06	3.04934e-05	Wif1	protein_coding
ENSMUSG00000039640	1749.56	1528.8	1970.32	-0.416504	0.0858543	-4.8195	1.43921e-06	3.0812e-05	Mrpl12	protein_coding
ENSMUSG00000035431	730.304	609.114	851.495	-0.432325	0.0821639	-4.81889	1.44361e-06	3.08522e-05	Sstr1	protein_coding
ENSMUSG00000033623	3291.11	2908.91	3673.32	-0.36259	0.0733288	-4.81875	1.44457e-06	3.08522e-05	Pcgf3	protein_coding
ENSMUSG00000089810	648.426	746.484	550.368	0.461802	0.0935303	4.8168	1.45878e-06	3.11183e-05		antisense
ENSMUSG00000022594	11659.2	9548.58	13769.9	-0.505846	0.0984838	-4.81463	1.47472e-06	3.14205e-05	Lynx1	protein_coding
ENSMUSG00000037601	2723.38	2379	3067.76	-0.384339	0.0772265	-4.81383	1.48068e-06	3.15097e-05	Nme1	protein_coding
ENSMUSG00000028822	2363.86	2089.67	2638.05	-0.360297	0.0729369	-4.81283	1.48806e-06	3.16289e-05	Tmem50a	protein_coding
ENSMUSG00000050334	2609.22	2090.53	3127.91	-0.563647	0.109662	-4.80852	1.52052e-06	3.228e-05	C130071C03Rik	lincRNA
ENSMUSG00000106870	183.453	143.389	223.518	-0.612496	0.120754	-4.80536	1.54472e-06	3.27547e-05
ENSMUSG00000042761	532.69	428.87	636.51	-0.532329	0.102167	-4.80098	1.5789e-06	3.34396e-05	Mrap2	protein_coding
ENSMUSG00000020173	1686.76	1350.04	2023.48	-0.511169	0.0946144	-4.79881	1.59614e-06	3.37644e-05	Cobl	protein_coding
ENSMUSG00000035711	161.706	114.389	209.024	-0.764307	0.150301	-4.79796	1.60288e-06	3.38494e-05	Dok3	protein_coding
ENSMUSG00000029064	27978.5	25237	30719.9	-0.279595	0.0564087	-4.79783	1.60397e-06	3.38494e-05	Gnb1	protein_coding
ENSMUSG00000054814	5124.39	4449.71	5799.07	-0.382435	0.0761014	-4.79679	1.61231e-06	3.39446e-05	Usp46	protein_coding
ENSMUSG00000041837	972.842	1124.29	821.396	0.437041	0.085793	4.79686	1.61175e-06	3.39446e-05	Pdcd7	protein_coding
ENSMUSG00000021033	2592.46	3001.88	2183.05	0.4406	0.0858286	4.79572	1.62091e-06	3.40853e-05	Gstz1	protein_coding
ENSMUSG00000034361	1549.05	1249.09	1849.01	-0.503044	0.094026	-4.79264	1.64598e-06	3.45714e-05	Cpne2	protein_coding
ENSMUSG00000102753	80.1699	51.4831	108.857	-0.878583	0.159823	-4.79063	1.66259e-06	3.48379e-05		TEC
ENSMUSG00000031959	1700.35	1877.44	1523.25	0.329773	0.0675808	4.79067	1.66225e-06	3.48379e-05	Wdr59	protein_coding
ENSMUSG00000020102	3334.14	2842.23	3826.06	-0.405371	0.0792037	-4.78635	1.69842e-06	3.55286e-05	Slc16a7	protein_coding
ENSMUSG00000058498	436.258	528.867	343.648	0.590069	0.115696	4.78621	1.69956e-06	3.55286e-05	Rnf207	protein_coding
ENSMUSG00000005897	650.68	736.012	565.348	0.415834	0.0858987	4.78487	1.71096e-06	3.57248e-05	Nr2c1	protein_coding
ENSMUSG00000054976	2415.02	2018.82	2811.22	-0.458399	0.0894128	-4.78294	1.72747e-06	3.60272e-05	Nyap2	protein_coding
ENSMUSG00000029168	9989.17	8068.15	11910.2	-0.500402	0.0939367	-4.78193	1.73618e-06	3.61663e-05	Dpysl5	protein_coding
ENSMUSG00000027331	246.091	187.9	304.282	-0.640365	0.123762	-4.78156	1.7394e-06	3.61909e-05	Knstrn	protein_coding
ENSMUSG00000029201	1497.73	1327.89	1667.56	-0.324975	0.0653661	-4.78109	1.74348e-06	3.62333e-05	Ugdh	protein_coding
ENSMUSG00000032899	133.662	88.6481	178.677	-0.836346	0.149216	-4.77949	1.75744e-06	3.64809e-05	Styk1	protein_coding
ENSMUSG00000028023	253.58	321.852	185.308	0.712493	0.156316	4.77667	1.78218e-06	3.6951e-05	Pitx2	protein_coding
ENSMUSG00000066357	16841	18473.6	15208.3	0.355697	0.0762491	4.77003	1.84194e-06	3.81456e-05	Wdr6	protein_coding
ENSMUSG00000037997	1821.75	2036.47	1607.04	0.331218	0.0664596	4.76978	1.84424e-06	3.81486e-05	Parp11	protein_coding
ENSMUSG00000033998	1905.91	1687.48	2124.35	-0.339501	0.0687752	-4.76805	1.86018e-06	3.84335e-05	Kcnk1	protein_coding
ENSMUSG00000030854	7094.65	5780.38	8408.91	-0.500887	0.0961606	-4.7675	1.86528e-06	3.84494e-05	Ptpn5	protein_coding
ENSMUSG00000055493	2196.8	2480.65	1912.94	0.375156	0.075374	4.76754	1.86487e-06	3.84494e-05	Epm2a	protein_coding
ENSMUSG00000024610	171.673	216.32	127.025	0.692141	0.136586	4.76108	1.92562e-06	3.96473e-05	Cd74	protein_coding
ENSMUSG00000011382	572.522	701.824	443.219	0.575268	0.105851	4.76038	1.93227e-06	3.9738e-05	Dhdh	protein_coding
ENSMUSG00000027332	2291.49	2709.84	1873.13	0.529239	0.105951	4.75965	1.93934e-06	3.98372e-05	Ivd	protein_coding
ENSMUSG00000031910	229.761	158.842	300.679	-0.783555	0.144558	-4.75895	1.946e-06	3.98818e-05	Has3	protein_coding
ENSMUSG00000020905	243.067	185.626	300.508	-0.636571	0.121932	-4.75918	1.94377e-06	3.98818e-05	Usp43	protein_coding
ENSMUSG00000109372	669.963	464.018	875.908	-0.786182	0.152011	-4.75865	1.9489e-06	3.9895e-05	Gm19410
ENSMUSG00000024172	2852.91	2434.55	3271.26	-0.437349	0.0884026	-4.75782	1.95694e-06	4.00137e-05	St6gal2	protein_coding
ENSMUSG00000032218	141.067	108.919	173.214	-0.644683	0.137996	-4.75693	1.96563e-06	4.01449e-05	Ccnb2	protein_coding
ENSMUSG00000026335	7285.75	8007.89	6563.6	0.310298	0.0639813	4.75531	1.98145e-06	4.04216e-05	Pam	protein_coding
ENSMUSG00000024924	5105.17	4397.22	5813.13	-0.377162	0.0744636	-4.75345	1.99975e-06	4.0748e-05	Vldlr	protein_coding
ENSMUSG00000053062	3529.06	3140.21	3917.91	-0.324652	0.0660224	-4.75286	2.00557e-06	4.08199e-05	Jam2	protein_coding
ENSMUSG00000028551	176.833	135.316	218.349	-0.639409	0.126504	-4.75178	2.0163e-06	4.09613e-05	Cdkn2c	protein_coding
ENSMUSG00000086401	116.81	149.238	84.3813	0.72422	0.139798	4.7517	2.01714e-06	4.09613e-05	Gm15559	processed_transcript
ENSMUSG00000032329	4705.17	5163.04	4247.31	0.278789	0.0568681	4.74829	2.05149e-06	4.16112e-05	Hmg20a	protein_coding
ENSMUSG00000006731	2844.06	2455.75	3232.36	-0.395765	0.0795941	-4.74682	2.06642e-06	4.18662e-05	B4galnt1	protein_coding
ENSMUSG00000034997	795.223	626.172	964.273	-0.561635	0.106073	-4.74601	2.07473e-06	4.19866e-05	Htr2a	protein_coding
ENSMUSG00000038909	3588.93	3993.92	3183.94	0.367891	0.0769559	4.7454	2.08091e-06	4.20637e-05	Kat7	protein_coding
ENSMUSG00000045174	1234.97	1068.85	1401.1	-0.371263	0.0739285	-4.74285	2.1073e-06	4.25487e-05	Amer3	protein_coding
ENSMUSG00000026202	8751.81	7341.34	10162.3	-0.421217	0.0814014	-4.74256	2.11037e-06	4.25623e-05	Tuba4a	protein_coding
ENSMUSG00000000766	201.678	150.441	252.916	-0.671689	0.127949	-4.73917	2.14601e-06	4.31162e-05	Oprm1	protein_coding
ENSMUSG00000021710	1432.03	1097.15	1766.92	-0.604392	0.111986	-4.73902	2.14755e-06	4.31162e-05	Nln	protein_coding
ENSMUSG00000040877	321.508	381.138	261.878	0.527197	0.105429	4.73916	2.14611e-06	4.31162e-05	Wdr25	protein_coding
ENSMUSG00000105449	257.085	328.374	185.795	0.726275	0.139335	4.73923	2.1453e-06	4.31162e-05
ENSMUSG00000087038	205.37	158.523	252.216	-0.640827	0.132373	-4.73849	2.15314e-06	4.31796e-05	2900079G21Rik	lincRNA
ENSMUSG00000000078	2995.01	2525.08	3464.94	-0.450154	0.0895548	-4.73597	2.18013e-06	4.36715e-05	Klf6	protein_coding
ENSMUSG00000004151	1613.25	1284.9	1941.61	-0.49396	0.090467	-4.73531	2.18719e-06	4.37636e-05	Etv1	protein_coding
ENSMUSG00000063160	3232.6	2788.45	3676.76	-0.391995	0.078775	-4.73231	2.21983e-06	4.43167e-05	Numbl	protein_coding
ENSMUSG00000005968	133.789	173.38	94.1968	0.761876	0.144872	4.73238	2.21901e-06	4.43167e-05	Tuft1	protein_coding
ENSMUSG00000028416	4242.27	3794.27	4690.27	-0.34094	0.0708365	-4.729	2.2563e-06	4.49942e-05	Bag1	protein_coding
ENSMUSG00000027469	389.926	300.115	479.738	-0.588662	0.109014	-4.72868	2.25988e-06	4.50149e-05	Tpx2	protein_coding
ENSMUSG00000021732	283.998	225.908	342.088	-0.584255	0.119161	-4.72836	2.2634e-06	4.50346e-05	Fgf10	protein_coding
ENSMUSG00000025212	3577.89	3083.19	4072.59	-0.373406	0.0740435	-4.72778	2.26987e-06	4.51127e-05	Sfxn3	protein_coding
ENSMUSG00000097048	612.266	719.335	505.197	0.487538	0.0962972	4.72613	2.28834e-06	4.53781e-05	1600020E01Rik	lincRNA
ENSMUSG00000111128	673.825	788.452	559.197	0.490427	0.0991167	4.72636	2.28582e-06	4.53781e-05
ENSMUSG00000014813	340.701	276.422	404.979	-0.514356	0.100381	-4.72566	2.2937e-06	4.54337e-05	Stc1	protein_coding
ENSMUSG00000067028	1025.31	859.378	1191.24	-0.453594	0.0898888	-4.7233	2.3205e-06	4.59134e-05	Cntnap5b	protein_coding
ENSMUSG00000054720	1144.38	948.182	1340.58	-0.438225	0.0840353	-4.71999	2.35857e-06	4.66146e-05	Lrrc8c	protein_coding
ENSMUSG00000004018	533.759	617.758	449.759	0.459772	0.0929951	4.71832	2.37796e-06	4.69456e-05	Fancl	protein_coding
ENSMUSG00000034744	1338.54	1160.54	1516.54	-0.414237	0.0857159	-4.71736	2.38923e-06	4.70603e-05	Nagk	protein_coding
ENSMUSG00000004798	6435.16	5738.09	7132.22	-0.307859	0.0627494	-4.71745	2.38816e-06	4.70603e-05	Ulk2	protein_coding
ENSMUSG00000026280	3072.9	3373.88	2771.93	0.286705	0.0589962	4.71715	2.39173e-06	4.70603e-05	Atg4b	protein_coding
ENSMUSG00000051427	1611.47	1786.94	1435.99	0.337402	0.0697858	4.71649	2.39945e-06	4.7094e-05	Ccdc157	protein_coding
ENSMUSG00000049191	1870.58	2072.15	1669.02	0.362838	0.0769199	4.71633	2.4014e-06	4.7094e-05	Rtl5	protein_coding
ENSMUSG00000034951	1829.16	2042.85	1615.47	0.376389	0.078986	4.71637	2.4009e-06	4.7094e-05	Cog7	protein_coding
ENSMUSG00000074884	2556.33	2308.1	2804.55	-0.31049	0.0647351	-4.71213	2.45142e-06	4.7969e-05	Serf2	protein_coding
ENSMUSG00000039199	1529.18	1724.41	1333.96	0.356351	0.071739	4.71213	2.45135e-06	4.7969e-05	Zdhhc1	protein_coding
ENSMUSG00000028893	856.667	996.565	716.769	0.497398	0.105225	4.71177	2.45572e-06	4.80002e-05	Sesn2	protein_coding
ENSMUSG00000000386	30.4373	47.2801	13.5945	1.12012	0.202425	4.71128	2.46163e-06	4.80626e-05	Mx1	protein_coding
ENSMUSG00000033102	566.4	678.342	454.457	0.556209	0.111565	4.70777	2.50443e-06	4.88446e-05	Cdc14b	protein_coding
ENSMUSG00000003974	1921.22	1543.15	2299.29	-0.539908	0.105512	-4.70748	2.50796e-06	4.88598e-05	Grm3	protein_coding
ENSMUSG00000031297	958.421	769.214	1147.63	-0.518385	0.0989739	-4.70554	2.53193e-06	4.92727e-05	Slc7a3	protein_coding
ENSMUSG00000079339	98.4132	63.402	133.424	-0.86998	0.161419	-4.70462	2.54336e-06	4.94409e-05	Ifit1bl1	protein_coding
ENSMUSG00000050511	253.487	192.199	314.775	-0.638004	0.121145	-4.7043	2.5474e-06	4.94652e-05	Oprd1	protein_coding
ENSMUSG00000066652	127.858	83.1846	172.531	-0.860127	0.163487	-4.70351	2.55732e-06	4.96036e-05	Lefty2	protein_coding
ENSMUSG00000067279	1636.24	1464.71	1807.77	-0.342783	0.0719295	-4.7016	2.58129e-06	4.99593e-05	Ppp1r3c	protein_coding
ENSMUSG00000022763	1857.59	2089.8	1625.37	0.356534	0.0724484	4.70172	2.57978e-06	4.99593e-05	Aifm3	protein_coding
ENSMUSG00000057706	797.964	654.867	941.062	-0.512695	0.1035	-4.70105	2.58829e-06	5.00308e-05	Mex3b	protein_coding
ENSMUSG00000020253	668.39	816.447	520.333	0.64195	0.144391	4.70086	2.59062e-06	5.00308e-05	Ppm1m	protein_coding
ENSMUSG00000040339	5461.05	4653.09	6269.01	-0.435862	0.0885237	-4.6991	2.61305e-06	5.04091e-05	Fam102b	protein_coding
ENSMUSG00000043410	499.363	584.025	414.7	0.475278	0.0946847	4.69816	2.62513e-06	5.05872e-05	Hfm1	protein_coding
ENSMUSG00000087381	312.383	385.266	239.5	0.619539	0.119214	4.69541	2.66078e-06	5.12185e-05		antisense
ENSMUSG00000000948	855.787	665.971	1045.6	-0.608736	0.120006	-4.69343	2.68668e-06	5.16611e-05		protein_coding
ENSMUSG00000010066	6847.44	7872.45	5822.42	0.468689	0.10038	4.68959	2.73754e-06	5.25821e-05	Cacna2d2	protein_coding
ENSMUSG00000033427	93.638	127.476	59.7997	0.876465	0.161614	4.68875	2.74879e-06	5.27412e-05	Upb1	protein_coding
ENSMUSG00000029469	2056.36	2353.38	1759.34	0.41627	0.0843612	4.68765	2.76357e-06	5.29103e-05	Ift81	protein_coding
ENSMUSG00000038872	1990.45	2327.52	1653.37	0.493088	0.101551	4.68772	2.76269e-06	5.29103e-05	Zfhx3	protein_coding
ENSMUSG00000079215	6332.95	6904.07	5761.84	0.264661	0.0549871	4.68546	2.79332e-06	5.33648e-05	Zfp664	protein_coding
ENSMUSG00000048330	4326.06	4800.89	3851.23	0.334041	0.0693109	4.68564	2.79092e-06	5.33648e-05	Ric3	protein_coding
ENSMUSG00000033615	11930.4	9432.91	14427.8	-0.561839	0.109522	-4.68407	2.8123e-06	5.36696e-05	Cplx1	protein_coding
ENSMUSG00000055540	748.113	596.689	899.537	-0.581395	0.118357	-4.68226	2.8373e-06	5.40857e-05	Epha6	protein_coding
ENSMUSG00000026219	13816.6	15092.2	12541	0.29904	0.0630199	4.68205	2.8402e-06	5.40857e-05	Trip12	protein_coding
ENSMUSG00000034636	13326.9	11968.3	14685.5	-0.276941	0.0567814	-4.67928	2.8788e-06	5.47619e-05	Zyg11b	protein_coding
ENSMUSG00000022018	834.472	701.505	967.439	-0.460876	0.0938052	-4.67807	2.89587e-06	5.50278e-05	Rgcc	protein_coding
ENSMUSG00000020681	1047.48	1261.62	833.336	0.583135	0.125746	4.66973	3.01601e-06	5.72494e-05	Ace	protein_coding
ENSMUSG00000022456	19993.2	18454.1	21532.2	-0.233162	0.0490317	-4.66667	3.06117e-06	5.80445e-05	Sept3	protein_coding
ENSMUSG00000032740	7215.7	6414.97	8016.43	-0.349212	0.0730788	-4.66626	3.06734e-06	5.80995e-05	Ccdc88a	protein_coding
ENSMUSG00000051934	1604.22	1808.48	1399.97	0.379894	0.0786584	4.66453	3.0933e-06	5.85287e-05	Spats2	protein_coding
ENSMUSG00000046818	207.826	154.154	261.498	-0.687478	0.137066	-4.66339	3.11045e-06	5.87905e-05	Ddit4l	protein_coding
ENSMUSG00000020649	225.37	167.962	282.778	-0.678071	0.135389	-4.66297	3.11679e-06	5.88477e-05	Rrm2	protein_coding
ENSMUSG00000029471	5517.97	4500.51	6535.43	-0.516254	0.103357	-4.66234	3.12639e-06	5.89662e-05	Camkk2	protein_coding
ENSMUSG00000040204	73.7614	42.5244	104.998	-0.979227	0.178094	-4.66026	3.15804e-06	5.94156e-05	Pclaf	protein_coding
ENSMUSG00000031360	1921.56	1653.22	2189.9	-0.405663	0.0829424	-4.66012	3.16026e-06	5.94156e-05	Ctps2	protein_coding
ENSMUSG00000040018	1316.67	1472.67	1160.67	0.345594	0.0713019	4.66053	3.15398e-06	5.94156e-05	Cox15	protein_coding
ENSMUSG00000037169	462.219	351.521	572.918	-0.622164	0.117859	-4.6597	3.16671e-06	5.94738e-05	Mycn	protein_coding
ENSMUSG00000033061	4087.46	3274.97	4899.96	-0.546475	0.108435	-4.65853	3.18469e-06	5.9715e-05	Resp18	protein_coding
ENSMUSG00000032624	3687.33	3990.38	3384.29	0.2652	0.0561674	4.65843	3.18628e-06	5.9715e-05	Eml4	protein_coding
ENSMUSG00000028251	798.392	681.327	915.456	-0.438668	0.0906623	-4.65567	3.22934e-06	6.04581e-05	Tstd3	protein_coding
ENSMUSG00000038214	428.831	504.07	353.592	0.500096	0.101134	4.65467	3.24498e-06	6.06869e-05	Bend3	protein_coding
ENSMUSG00000031824	7826.89	8677.1	6976.67	0.346795	0.0734586	4.65278	3.27485e-06	6.11168e-05	6430548M08Rik	protein_coding
ENSMUSG00000029313	611.462	692.519	530.404	0.401558	0.0837658	4.65284	3.27397e-06	6.11168e-05	Aff1	protein_coding
ENSMUSG00000003518	4972.51	4437.27	5507.76	-0.286733	0.0587952	-4.6518	3.29058e-06	6.13458e-05	Dusp3	protein_coding
ENSMUSG00000041319	354.495	418.384	290.606	0.497469	0.0993082	4.65122	3.29984e-06	6.14539e-05	Thoc6	protein_coding
ENSMUSG00000042604	926.023	740.175	1111.87	-0.543323	0.10682	-4.65014	3.31708e-06	6.16122e-05	Kcna4	protein_coding
ENSMUSG00000041058	2704.02	2397.21	3010.83	-0.325017	0.0670696	-4.65004	3.31876e-06	6.16122e-05	Wwp1	protein_coding
ENSMUSG00000036764	523.656	610.94	436.371	0.475001	0.0965843	4.65006	3.31833e-06	6.16122e-05	Dnajc12	protein_coding
ENSMUSG00000031167	1515.12	1299.22	1731.01	-0.408038	0.0832489	-4.64934	3.32997e-06	6.17558e-05	Rbm3	protein_coding
ENSMUSG00000028630	2902.5	2531.86	3273.13	-0.34131	0.0690518	-4.64894	3.3365e-06	6.18123e-05	Dyrk2	protein_coding
ENSMUSG00000041921	1480.27	1682.15	1278.39	0.371688	0.0751216	4.6464	3.3777e-06	6.25103e-05	Metap1d	protein_coding
ENSMUSG00000031930	1709.44	1909.71	1509.17	0.350837	0.0730981	4.64568	3.38964e-06	6.26659e-05	Wwp2	protein_coding
ENSMUSG00000025137	2907.31	2495.62	3319	-0.417201	0.0864076	-4.64394	3.41827e-06	6.31295e-05	Pcyt2	protein_coding
ENSMUSG00000094002	1536.45	1365.2	1707.69	-0.350758	0.0738548	-4.64354	3.42489e-06	6.3186e-05	Gm9866	lincRNA
ENSMUSG00000035041	51.6623	73.5594	29.7652	0.965447	0.184375	4.64189	3.45235e-06	6.36264e-05	Creb3l3	protein_coding
ENSMUSG00000007603	3694.03	4131.25	3256.81	0.318243	0.0650057	4.63755	3.52569e-06	6.49107e-05	Dus3l	protein_coding
ENSMUSG00000039913	1135.71	961.41	1310.02	-0.428792	0.0866346	-4.63563	3.55855e-06	6.54478e-05	Pak7	protein_coding
ENSMUSG00000029821	630.612	722.368	538.856	0.442387	0.0930946	4.6352	3.56591e-06	6.55153e-05	Gsdme	protein_coding
ENSMUSG00000070823	906.454	758.615	1054.29	-0.434708	0.0862716	-4.63474	3.57386e-06	6.55935e-05	Gm1043	protein_coding
ENSMUSG00000022382	985.679	798.531	1172.83	-0.511313	0.100766	-4.6334	3.59707e-06	6.59513e-05	Wnt7b	protein_coding
ENSMUSG00000052525	77.3578	103.023	51.6924	0.82026	0.164005	4.63232	3.61585e-06	6.62272e-05	Spdya	protein_coding
ENSMUSG00000026816	1090.2	1233.94	946.458	0.373771	0.0766685	4.63027	3.65198e-06	6.68199e-05	Gtf3c5	protein_coding
ENSMUSG00000040564	182.63	245.185	120.075	0.835517	0.152005	4.62999	3.65691e-06	6.68412e-05	Apoc1	protein_coding
ENSMUSG00000030621	1676.07	1406.76	1945.38	-0.439065	0.0879329	-4.62758	3.69969e-06	6.75484e-05	Me3	protein_coding
ENSMUSG00000003031	2099.31	1835.55	2363.07	-0.361631	0.0746222	-4.62738	3.70321e-06	6.75484e-05	Cdkn1b	protein_coding
ENSMUSG00000024661	24319	21357.9	27280.2	-0.38831	0.082278	-4.6267	3.71535e-06	6.77002e-05	Fth1	protein_coding
ENSMUSG00000028261	1636.8	1426.52	1847.07	-0.377207	0.0781045	-4.6237	3.7695e-06	6.86165e-05	Ndufaf4	protein_coding
ENSMUSG00000028678	101.05	70.3676	131.733	-0.769445	0.148769	-4.62342	3.77468e-06	6.86402e-05	Kif2c	protein_coding
ENSMUSG00000026683	281.006	214.962	347.051	-0.627881	0.123927	-4.62321	3.77854e-06	6.86402e-05	Nuf2	protein_coding
ENSMUSG00000020395	31.6508	47.5621	15.7395	1.02107	0.202468	4.62255	3.79042e-06	6.87857e-05	Itk	protein_coding
ENSMUSG00000056612	289.613	232.266	346.959	-0.548244	0.110562	-4.62114	3.8163e-06	6.91845e-05	Ppp1r14b	protein_coding
ENSMUSG00000038708	6023.42	6657.41	5389.43	0.322708	0.0681258	4.61955	3.84574e-06	6.96471e-05	Golga4	protein_coding
ENSMUSG00000041216	2306.76	2011.32	2602.21	-0.338704	0.0688502	-4.61822	3.87037e-06	7.00217e-05	Clvs1	protein_coding
ENSMUSG00000069835	675.681	786.163	565.2	0.447712	0.0900104	4.61662	3.9004e-06	7.04932e-05	Sat2	protein_coding
ENSMUSG00000041559	901.722	1106.44	697.005	0.623197	0.129199	4.61488	3.93327e-06	7.10149e-05	Fmod	protein_coding
ENSMUSG00000052155	4264.72	3506.96	5022.48	-0.461047	0.0898736	-4.61405	3.9489e-06	7.12247e-05	Acvr2a	protein_coding
ENSMUSG00000026141	471.933	336.054	607.812	-0.742955	0.14403	-4.61226	3.98306e-06	7.17678e-05	Col19a1	protein_coding
ENSMUSG00000006941	3560.99	3257	3864.97	-0.268047	0.0570771	-4.61055	4.01611e-06	7.22899e-05	Eif1b	protein_coding
ENSMUSG00000048922	106.027	74.4394	137.615	-0.758864	0.151371	-4.60978	4.03098e-06	7.24842e-05	Cdca2	protein_coding
ENSMUSG00000037990	1714.26	1329.23	2099.29	-0.582687	0.11103	-4.60814	4.06284e-06	7.29832e-05	Sh3rf3	protein_coding
ENSMUSG00000058440	965.432	1096.07	834.797	0.364097	0.0740714	4.60735	4.07831e-06	7.3187e-05	Nrf1	protein_coding
ENSMUSG00000051391	46505.3	39250.4	53760.2	-0.403588	0.0800933	-4.60641	4.09675e-06	7.33999e-05	Ywhag	protein_coding
ENSMUSG00000045409	2488.24	2737.33	2239.14	0.297303	0.0626149	4.60626	4.09973e-06	7.33999e-05	Trim39	protein_coding
ENSMUSG00000062252	344.315	431.524	257.105	0.658719	0.127744	4.60612	4.10259e-06	7.33999e-05	Lhfpl5	protein_coding
ENSMUSG00000069206	418.119	336.684	499.554	-0.537681	0.10777	-4.60331	4.15834e-06	7.43224e-05	Zfp874a	protein_coding
ENSMUSG00000055373	6261.49	5386.96	7136.03	-0.421002	0.0880107	-4.6009	4.20668e-06	7.50751e-05	Fut9	protein_coding
ENSMUSG00000027198	1974.13	2198.24	1750.02	0.364923	0.0783875	4.60079	4.20891e-06	7.50751e-05	Ext2	protein_coding
ENSMUSG00000079657	1174.04	1415.28	932.8	0.563704	0.112781	4.59743	4.27744e-06	7.62209e-05	Rab26	protein_coding
ENSMUSG00000056888	47.2798	26.3443	68.2153	-0.967022	0.192609	-4.59658	4.29492e-06	7.64556e-05	Glipr1	protein_coding
ENSMUSG00000030649	1045.46	1180.87	910.054	0.343372	0.0701921	4.59411	4.34597e-06	7.72869e-05	Anapc15	protein_coding
ENSMUSG00000049176	2262.21	1926.11	2598.31	-0.413439	0.0842094	-4.59266	4.37628e-06	7.7748e-05	Frmpd4	protein_coding
ENSMUSG00000056851	8275.92	9043.16	7508.67	0.305208	0.0658631	4.59017	4.42893e-06	7.86046e-05	Pcbp2	protein_coding
ENSMUSG00000058291	1811.63	1576.43	2046.83	-0.383896	0.0802547	-4.58619	4.51409e-06	7.99884e-05	Zfp68	protein_coding
ENSMUSG00000008226	1259.57	1438.56	1080.59	0.409036	0.084936	4.58611	4.51591e-06	7.99884e-05	Scrn3	protein_coding
ENSMUSG00000018666	2398.96	2616.79	2181.13	0.278492	0.0593933	4.58555	4.52788e-06	8.01205e-05	Cbx1	protein_coding
ENSMUSG00000015217	537.819	448.965	626.673	-0.487095	0.102694	-4.5826	4.59234e-06	8.11802e-05	Hmgb3	protein_coding
ENSMUSG00000103009	264.582	208.343	320.821	-0.580839	0.117688	-4.58103	4.62688e-06	8.17093e-05		TEC
ENSMUSG00000024427	649.372	528.901	769.843	-0.49129	0.0972602	-4.57978	4.65467e-06	8.21184e-05	Spry4	protein_coding
ENSMUSG00000076437	660.204	554.164	766.243	-0.448075	0.0917025	-4.57955	4.6598e-06	8.21272e-05	Selenoh	protein_coding
ENSMUSG00000049092	1879.7	1646.77	2112.63	-0.351475	0.0731775	-4.57877	4.67722e-06	8.23525e-05	Gpr137c	protein_coding
ENSMUSG00000053094	2247.1	2464.72	2029.49	0.323596	0.0702724	4.57765	4.70225e-06	8.27111e-05	Tmem248	protein_coding
ENSMUSG00000014554	731.127	822.523	639.73	0.378647	0.0800812	4.57592	4.74125e-06	8.33146e-05	Dguok	protein_coding
ENSMUSG00000020358	6648.75	5986.09	7311.4	-0.302557	0.0643876	-4.57546	4.75174e-06	8.34163e-05	Hnrnpab	protein_coding
ENSMUSG00000024989	103.886	71.6496	136.122	-0.778687	0.156803	-4.57511	4.75972e-06	8.34366e-05	Cep55	protein_coding
ENSMUSG00000022525	1066.59	1241.92	891.266	0.479848	0.100834	4.575	4.7623e-06	8.34366e-05	Hrasls	protein_coding
ENSMUSG00000040714	77.0083	106.982	47.0341	0.914853	0.164728	4.5741	4.78271e-06	8.37116e-05	Klc3	protein_coding
ENSMUSG00000030533	1244.16	1098.72	1389.61	-0.346056	0.0730274	-4.57361	4.79402e-06	8.38268e-05	Unc45a	protein_coding
ENSMUSG00000024937	1513.5	1249	1778	-0.478679	0.0965024	-4.57284	4.81146e-06	8.39664e-05	Ehbp1l1	protein_coding
ENSMUSG00000003348	778.821	669.51	888.131	-0.402324	0.0837356	-4.57285	4.81136e-06	8.39664e-05	Mob3a	protein_coding
ENSMUSG00000041534	28.2462	41.5907	14.9018	0.906927	0.206212	4.57163	4.83941e-06	8.43711e-05	Rbp3	protein_coding
ENSMUSG00000019850	180.581	139.707	221.454	-0.620153	0.128471	-4.56955	4.88768e-06	8.50496e-05	Tnfaip3	protein_coding
ENSMUSG00000079227	204.955	159.119	250.791	-0.608459	0.123538	-4.56954	4.88791e-06	8.50496e-05	Ccr5	protein_coding
ENSMUSG00000023980	747.402	844.161	650.644	0.377746	0.0791982	4.56769	4.93134e-06	8.57213e-05	Taf8	protein_coding
ENSMUSG00000027335	130.985	90.2227	171.748	-0.776709	0.151269	-4.56639	4.96184e-06	8.61671e-05	Adra1d	protein_coding
ENSMUSG00000097787	145.099	184.408	105.791	0.704528	0.140471	4.56527	4.98857e-06	8.65465e-05	2700046G09Rik	lincRNA
ENSMUSG00000020629	1573.21	1805.89	1340.53	0.430869	0.0903498	4.56388	5.02173e-06	8.70368e-05	Adi1	protein_coding
ENSMUSG00000019920	2309.45	2050.31	2568.59	-0.323137	0.0679554	-4.56321	5.03776e-06	8.72295e-05	Lims1	protein_coding
ENSMUSG00000034413	1670.65	1247.33	2093.97	-0.660198	0.127404	-4.56265	5.05124e-06	8.72924e-05	Neurl1b	protein_coding
ENSMUSG00000111092	338.75	438.313	239.187	0.745922	0.146402	4.56275	5.04874e-06	8.72924e-05
ENSMUSG00000079316	1272.67	1117.24	1428.1	-0.383296	0.0820686	-4.55997	5.11613e-06	8.83278e-05	Rab9	protein_coding
ENSMUSG00000047648	559.086	470.503	647.67	-0.444472	0.0913914	-4.55935	5.13125e-06	8.85028e-05	Fbxo30	protein_coding
ENSMUSG00000039497	404.277	343.37	465.183	-0.457896	0.0976979	-4.55914	5.13635e-06	8.85048e-05	Dse	protein_coding
ENSMUSG00000041141	7241.85	8216.95	6266.75	0.410024	0.0874542	4.55658	5.19934e-06	8.95033e-05	Pnmal1	protein_coding
ENSMUSG00000021903	112.621	148.518	76.7252	0.789715	0.160092	4.55592	5.21558e-06	8.96959e-05	Galnt15	protein_coding
ENSMUSG00000087211	220.557	293.41	147.703	0.787897	0.174314	4.55367	5.27177e-06	9.05744e-05	Lhx1os	lincRNA
ENSMUSG00000057378	4351.72	3807.67	4895.77	-0.372062	0.0786418	-4.55177	5.31971e-06	9.13097e-05	Ryr3	protein_coding
ENSMUSG00000042790	3496.16	3829.42	3162.89	0.319041	0.0697452	4.55066	5.34769e-06	9.17012e-05	Rnf214	protein_coding
ENSMUSG00000029782	1455.59	1621.23	1289.95	0.353387	0.0758583	4.5495	5.37737e-06	9.21211e-05	Tmem209	protein_coding
ENSMUSG00000031517	46711.8	39585.8	53837.8	-0.414448	0.0843106	-4.54899	5.39052e-06	9.22133e-05	Gpm6a	protein_coding
ENSMUSG00000074627	67.2303	91.0859	43.3747	0.849724	0.168593	4.54888	5.39314e-06	9.22133e-05	Mroh8	protein_coding
ENSMUSG00000072964	4512.11	3955.89	5068.34	-0.321362	0.0663409	-4.54392	5.52187e-06	9.43235e-05	Bhlhb9	protein_coding
ENSMUSG00000053702	3686.5	3289.2	4083.8	-0.324637	0.0692553	-4.54044	5.61367e-06	9.57309e-05	Nebl	protein_coding
ENSMUSG00000029328	9094.19	8237.58	9950.8	-0.289737	0.062249	-4.54039	5.61505e-06	9.57309e-05	Hnrnpdl	protein_coding
ENSMUSG00000035131	2317.05	2053.04	2581.07	-0.315482	0.0662497	-4.53602	5.73256e-06	9.76405e-05	Brinp3	protein_coding
ENSMUSG00000045671	2175.34	1830.12	2520.56	-0.422656	0.0857849	-4.53373	5.79507e-06	9.86106e-05	Spred2	protein_coding
ENSMUSG00000044117	9089.18	8357.29	9821.06	-0.260664	0.0567001	-4.53187	5.84639e-06	9.93886e-05	2900011O08Rik	protein_coding
ENSMUSG00000026463	9590.37	7730.77	11450	-0.447444	0.0842701	-4.53047	5.88538e-06	9.99558e-05	Atp2b4	protein_coding
ENSMUSG00000031970	915.974	810.804	1021.14	-0.360738	0.0780677	-4.52802	5.95385e-06	0.000101022	Dbndd1	protein_coding
ENSMUSG00000038128	10578	7846.99	13308.9	-0.656338	0.124604	-4.52652	5.9962e-06	0.000101613	Camk4	protein_coding
ENSMUSG00000072294	1898.85	1668.25	2129.45	-0.347949	0.073411	-4.52624	6.00411e-06	0.000101613	Klf12	protein_coding
ENSMUSG00000022956	5787.06	5181.77	6392.35	-0.34553	0.0754594	-4.52618	6.00587e-06	0.000101613	Atp5o	protein_coding
ENSMUSG00000027349	1859.06	2041.71	1676.4	0.316113	0.0688694	4.52422	6.06191e-06	0.000102464	Fam98b	protein_coding
ENSMUSG00000038095	7610.16	8211.04	7009.27	0.249304	0.0542688	4.5213	6.14615e-06	0.000103789	Sbno1	protein_coding
ENSMUSG00000036095	4567.09	3718.24	5415.94	-0.482287	0.0952865	-4.52034	6.17395e-06	0.000104159	Dgkb	protein_coding
ENSMUSG00000038295	241.291	186.877	295.706	-0.596504	0.119457	-4.51752	6.25675e-06	0.000105456	Atg9b	protein_coding
ENSMUSG00000002210	927.429	1055.7	799.153	0.412202	0.0875999	4.51723	6.26537e-06	0.000105501	Smg9	protein_coding
ENSMUSG00000059475	1689.17	1483.59	1894.75	-0.36097	0.0768768	-4.51685	6.27657e-06	0.000105589	Zfp426	protein_coding
ENSMUSG00000022996	52.0561	70.8379	33.2744	0.803282	0.191121	4.51638	6.29051e-06	0.000105724	Wnt10b	protein_coding
ENSMUSG00000016494	1448.6	1233.66	1663.53	-0.411004	0.0853835	-4.51604	6.30075e-06	0.000105795	Cd34	protein_coding
ENSMUSG00000033526	4785.47	5405.42	4165.52	0.386054	0.0825128	4.51581	6.3075e-06	0.000105809	Ppip5k1	protein_coding
ENSMUSG00000066979	2258.26	2499.58	2016.94	0.313293	0.0669466	4.51445	6.34826e-06	0.000106392	Bub3	protein_coding
ENSMUSG00000031093	1255.88	1063.97	1447.79	-0.426569	0.0882653	-4.51382	6.36713e-06	0.000106607	Dock11	protein_coding
ENSMUSG00000028114	1396.86	1558.8	1234.92	0.33728	0.0718967	4.51167	6.43179e-06	0.000107588	Mettl14	protein_coding
ENSMUSG00000021495	3903.54	3523.14	4283.93	-0.299127	0.0646726	-4.51069	6.46166e-06	0.000107986	Fam193b	protein_coding
ENSMUSG00000008682	189.891	146.299	233.483	-0.611339	0.123886	-4.50963	6.49415e-06	0.000108427	Rpl10	protein_coding
ENSMUSG00000021360	480.05	369.132	590.968	-0.607502	0.120238	-4.50916	6.5086e-06	0.000108495	Gcnt2	protein_coding
ENSMUSG00000026568	2193.67	1912.66	2474.69	-0.375163	0.0794701	-4.5091	6.51043e-06	0.000108495	Mpc2	protein_coding
ENSMUSG00000097123	237.191	294.638	179.744	0.627018	0.122339	4.50749	6.55978e-06	0.000109215		lincRNA
ENSMUSG00000071866	1723.49	1545.24	1901.74	-0.327128	0.0710657	-4.50477	6.64458e-06	0.000110523	Ppia	protein_coding
ENSMUSG00000109293	45.492	63.4725	27.5115	0.895578	0.184103	4.5042	6.66245e-06	0.000110716	Dcst2
ENSMUSG00000037443	721.348	816.18	626.516	0.382406	0.081299	4.50332	6.6901e-06	0.000111072	Cep85	protein_coding
ENSMUSG00000050708	1511.97	1298.35	1725.6	-0.453865	0.100949	-4.50215	6.72684e-06	0.000111578	Ftl1	protein_coding
ENSMUSG00000002329	1363.8	1186.32	1541.29	-0.35807	0.0749253	-4.5014	6.75078e-06	0.00011187	Mdp1	protein_coding
ENSMUSG00000083674	183.08	222.95	143.21	0.596654	0.125043	4.49859	6.84065e-06	0.000113254	Gm38402	unitary_pseudogene
ENSMUSG00000041642	10763.6	8598.63	12928.7	-0.51708	0.10131	-4.49737	6.88008e-06	0.0001138	Kif21b	protein_coding
ENSMUSG00000099170	42.5787	63.7727	21.3846	1.04827	0.196701	4.49289	7.02635e-06	0.000116111	5730403I07Rik	lincRNA
ENSMUSG00000020212	825.523	932.499	718.547	0.37171	0.0787189	4.49099	7.0893e-06	0.000117043	Mdm1	protein_coding
ENSMUSG00000003033	4042.76	4453.46	3632.06	0.301305	0.0650161	4.48869	7.16638e-06	0.000118205	Ap1m1	protein_coding
ENSMUSG00000108880	837.035	638.145	1035.93	-0.631456	0.127916	-4.48431	7.31516e-06	0.000120547
ENSMUSG00000036617	2126.81	1787.14	2466.48	-0.38878	0.0778477	-4.48174	7.40366e-06	0.000121602	Etl4	protein_coding
ENSMUSG00000036295	4683.38	4160.41	5206.34	-0.319925	0.0683482	-4.4817	7.40514e-06	0.000121602	Lrrn3	protein_coding
ENSMUSG00000003992	4469.28	4992.12	3946.43	0.341587	0.0731403	4.48214	7.38969e-06	0.000121602	Ssbp2	protein_coding
ENSMUSG00000022622	150.338	189.429	111.246	0.667023	0.131408	4.48166	7.40658e-06	0.000121602	Acr	protein_coding
ENSMUSG00000001518	806.1	936.528	675.672	0.422043	0.0860252	4.47744	7.55426e-06	0.000123912	Itfg2	protein_coding
ENSMUSG00000017715	2571.17	2795.96	2346.37	0.285019	0.0628499	4.47514	7.63596e-06	0.000125137	Pgs1	protein_coding
ENSMUSG00000031816	1422.16	1623.39	1220.92	0.385303	0.080328	4.47314	7.70797e-06	0.0001262	Mthfsd	protein_coding
ENSMUSG00000020444	2615.2	2320.84	2909.56	-0.364809	0.0804139	-4.47223	7.74082e-06	0.000126621	Guk1	protein_coding
ENSMUSG00000067081	226.167	275.417	176.918	0.592216	0.124472	4.47105	7.78379e-06	0.000127207	Asb18	protein_coding
ENSMUSG00000044986	1088.66	968.919	1208.39	-0.369642	0.0826798	-4.47007	7.8194e-06	0.000127671	Tst	protein_coding
ENSMUSG00000001445	2192.47	2454.46	1930.47	0.327565	0.0694369	4.46632	7.95769e-06	0.00012981	Mrpl10	protein_coding
ENSMUSG00000071415	2125.55	1927.36	2323.73	-0.319192	0.0712221	-4.46357	8.06056e-06	0.000131367	Rpl23	protein_coding
ENSMUSG00000034917	80.9561	106.526	55.3858	0.769335	0.171741	4.46209	8.11646e-06	0.000132157	Tjp3	protein_coding
ENSMUSG00000023960	12955.6	14195.9	11715.2	0.298064	0.0654281	4.45992	8.19921e-06	0.000133382	Enpp5	protein_coding
ENSMUSG00000108228	218.125	270.941	165.308	0.658896	0.143727	4.45934	8.22132e-06	0.000133619	6430584L05Rik
ENSMUSG00000103529	106.419	78.9931	133.845	-0.68362	0.147775	-4.45721	8.30351e-06	0.000134478		TEC
ENSMUSG00000008475	4788.46	3969.13	5607.79	-0.503306	0.108054	-4.45697	8.31275e-06	0.000134478	Arpc5	protein_coding
ENSMUSG00000022788	2734.01	2298.74	3169.28	-0.45927	0.0971866	-4.45679	8.31966e-06	0.000134478	Fgd4	protein_coding
ENSMUSG00000028333	1589.06	1333.3	1844.81	-0.42839	0.0881475	-4.45777	8.2818e-06	0.000134478	Anp32b	protein_coding
ENSMUSG00000030127	3284.5	3657.94	2911.07	0.317604	0.067889	4.4575	8.292e-06	0.000134478	Cops7a	protein_coding
ENSMUSG00000037321	161.311	197.375	125.246	0.605486	0.126023	4.45703	8.31017e-06	0.000134478	Tap1	protein_coding
ENSMUSG00000011306	2286.82	2541.3	2032.33	0.28857	0.061231	4.45631	8.33824e-06	0.000134656	Sugp1	protein_coding
ENSMUSG00000006711	1422.4	1231.4	1613.4	-0.356096	0.074543	-4.45596	8.35194e-06	0.000134672	D130043K22Rik	protein_coding
ENSMUSG00000029291	10695.8	9649.72	11741.9	-0.261305	0.0561691	-4.4557	8.362e-06	0.000134672	Rufy3	protein_coding
ENSMUSG00000003949	3979.07	4591.77	3366.37	0.452131	0.0982542	4.45588	8.3549e-06	0.000134672	Hlf	protein_coding
ENSMUSG00000028351	5925.09	5382.06	6468.11	-0.266913	0.0581159	-4.45429	8.41718e-06	0.000135438	Brinp1	protein_coding
ENSMUSG00000059278	1191.67	1408.17	975.171	0.486121	0.0990129	4.45301	8.46757e-06	0.000136125	Naa38	protein_coding
ENSMUSG00000092083	1151.06	989.241	1312.89	-0.40847	0.0872524	-4.45162	8.52267e-06	0.000136763	Kcnb2	protein_coding
ENSMUSG00000020064	1423.16	1255.67	1590.64	-0.325658	0.069475	-4.45176	8.51702e-06	0.000136763	Herc4	protein_coding
ENSMUSG00000009687	639.359	528.672	750.047	-0.504847	0.109276	-4.45141	8.53081e-06	0.00013677	Fxyd5	protein_coding
ENSMUSG00000037994	130.446	96.7249	164.168	-0.677794	0.141936	-4.45083	8.55385e-06	0.000137016	Slc9b2	protein_coding
ENSMUSG00000035184	1520.41	1238.46	1802.35	-0.517145	0.108126	-4.45039	8.57155e-06	0.000137176	Fam124a	protein_coding
ENSMUSG00000031155	906.706	769.164	1044.25	-0.402041	0.0833632	-4.44894	8.62953e-06	0.000137979	Pim2	protein_coding
ENSMUSG00000032118	11567.6	10670	12465.2	-0.229949	0.0505671	-4.44693	8.71042e-06	0.000139147	Fez1	protein_coding
ENSMUSG00000049612	4225.81	3611.13	4840.5	-0.411001	0.0872858	-4.445	8.78935e-06	0.000140282	Omg	protein_coding
ENSMUSG00000021534	506.423	386.631	626.214	-0.629357	0.127543	-4.44287	8.8767e-06	0.000141549	1700001L19Rik	protein_coding
ENSMUSG00000029154	108.159	74.0617	142.257	-0.778116	0.171355	-4.44166	8.92677e-06	0.000141584	Cwh43	protein_coding
ENSMUSG00000052040	2897.93	2279.89	3515.97	-0.536657	0.104345	-4.44231	8.89997e-06	0.000141584	Klf13	protein_coding
ENSMUSG00000022099	7087.18	6082.24	8092.13	-0.388206	0.0815663	-4.44194	8.91508e-06	0.000141584	Dmtn	protein_coding
ENSMUSG00000022305	2327.74	2580.58	2074.89	0.327295	0.0715067	4.44197	8.91372e-06	0.000141584	Lrp12	protein_coding
ENSMUSG00000056429	7999.35	8850.07	7148.64	0.334806	0.0739493	4.44182	8.92024e-06	0.000141584	Tgoln1	protein_coding
ENSMUSG00000030309	1046.33	1197.81	894.848	0.425315	0.0920075	4.44173	8.92386e-06	0.000141584	Caprin2	protein_coding
ENSMUSG00000050623	76.4863	49.3829	103.59	-0.835289	0.176207	-4.44136	8.93901e-06	0.000141651	Catsperz	protein_coding
ENSMUSG00000028150	49.6457	70.6693	28.6221	0.930567	0.188731	4.44032	8.98267e-06	0.000142216	Rorc	protein_coding
ENSMUSG00000036833	392.929	448.504	337.353	0.437234	0.0969304	4.43889	9.04251e-06	0.000143036	Pnpla7	protein_coding
ENSMUSG00000036698	9563.62	10412.6	8714.61	0.319502	0.0730038	4.43828	9.06803e-06	0.000143312	Ago2	protein_coding
ENSMUSG00000072944	96.6475	129.051	64.2443	0.813135	0.160983	4.43773	9.09111e-06	0.000143549	Nup62cl	protein_coding
ENSMUSG00000029120	18714.8	16706.5	20723	-0.317677	0.0690856	-4.4361	9.1603e-06	0.000144385	Ppp2r2c	protein_coding
ENSMUSG00000032850	5660.67	6122.76	5198.58	0.279682	0.0627487	4.43616	9.15761e-06	0.000144385	Rnft2	protein_coding
ENSMUSG00000030706	1153.7	1311.72	995.675	0.36559	0.0768292	4.43492	9.21066e-06	0.00014505	Mrpl48	protein_coding
ENSMUSG00000046792	485.588	562.375	408.801	0.452225	0.0965174	4.43468	9.22075e-06	0.00014508	Zfp787	protein_coding
ENSMUSG00000040459	13593.1	15064.5	12121.8	0.300266	0.0646184	4.4338	9.25884e-06	0.00014555	Arglu1	protein_coding
ENSMUSG00000046613	3543.53	2948.52	4138.54	-0.483067	0.104535	-4.42933	9.45254e-06	0.000148463	Vwa5b2	protein_coding
ENSMUSG00000030123	2800.84	2059.8	3541.88	-0.672097	0.1316	-4.42838	9.4945e-06	0.000148859	Plxnd1	protein_coding
ENSMUSG00000022701	340.749	395.729	285.768	0.480149	0.105024	4.42855	9.48685e-06	0.000148859	Ccdc191	protein_coding
ENSMUSG00000004035	586.459	678.912	494.005	0.453643	0.0969949	4.42697	9.55671e-06	0.000149702	Gstm7	protein_coding
ENSMUSG00000031016	377.115	284.576	469.654	-0.639766	0.130253	-4.42575	9.6108e-06	0.000150417	Wee1	protein_coding
ENSMUSG00000044674	1132.34	1375.84	888.829	0.576437	0.119836	4.42498	9.64531e-06	0.000150824	Fzd1	protein_coding
ENSMUSG00000048439	494.369	559.682	429.055	0.406206	0.0897378	4.42468	9.65845e-06	0.000150896	Nupl2	protein_coding
ENSMUSG00000091994	261.071	314.9	207.243	0.540079	0.109838	4.42369	9.70306e-06	0.00015146	E130317F20Rik	processed_transcript
ENSMUSG00000090952	129.156	160.928	97.3833	0.652024	0.137358	4.42291	9.7382e-06	0.000151875		processed_transcript
ENSMUSG00000005873	22303	20180.7	24425.2	-0.295494	0.065257	-4.42198	9.78028e-06	0.000152263	Reep5	protein_coding
ENSMUSG00000040151	4884.87	5371.9	4397.84	0.28317	0.0616413	4.42201	9.77871e-06	0.000152263	Hs2st1	protein_coding
ENSMUSG00000033307	742.988	608.431	877.545	-0.506865	0.107334	-4.42086	9.83076e-06	0.000152915	Mif	protein_coding
ENSMUSG00000060240	10616.7	9198.54	12034.9	-0.384603	0.0828782	-4.42007	9.8668e-06	0.000153341	Cend1	protein_coding
ENSMUSG00000024502	3281.42	2940	3622.85	-0.280191	0.0604905	-4.418	9.9618e-06	0.000154682	Jakmip2	protein_coding
ENSMUSG00000022034	96.6405	67.1866	126.094	-0.758005	0.149825	-4.41756	9.982e-06	0.00015477	Esco2	protein_coding
ENSMUSG00000032482	15366.1	13633.9	17098.3	-0.327996	0.0712756	-4.4175	9.9849e-06	0.00015477	Cspg5	protein_coding
ENSMUSG00000026234	17068	18373.3	15762.6	0.274219	0.0623156	4.41662	1.00257e-05	0.000155267	Ncl	protein_coding
ENSMUSG00000039960	1461.09	1254.39	1667.8	-0.402255	0.0861982	-4.41501	1.01006e-05	0.000156291	Rhou	protein_coding
ENSMUSG00000025920	6612.21	5953.84	7270.59	-0.291347	0.0637938	-4.41336	1.01778e-05	0.000157348	Stau2	protein_coding
ENSMUSG00000039976	4746.61	3943.87	5549.35	-0.477097	0.10116	-4.41207	1.02388e-05	0.000158154	Tbc1d16	protein_coding
ENSMUSG00000025407	284.301	339.2	229.402	0.512445	0.105585	4.41039	1.03184e-05	0.000159245	Gli1	protein_coding
ENSMUSG00000020736	1390.32	1230.23	1550.41	-0.359049	0.0795717	-4.40663	1.04993e-05	0.000161895	Nt5c	protein_coding
ENSMUSG00000056367	3264.17	2598.02	3930.33	-0.569815	0.120969	-4.4061	1.05246e-05	0.000162145	Actr3b	protein_coding
ENSMUSG00000028911	3192.32	3519.21	2865.44	0.312456	0.0690144	4.40558	1.055e-05	0.000162395	Srsf4	protein_coding
ENSMUSG00000033170	596.453	750.619	442.287	0.668189	0.135747	4.40341	1.06563e-05	0.000163889	Card10	protein_coding
ENSMUSG00000049421	2674.29	2335.24	3013.34	-0.360857	0.077674	-4.40276	1.0688e-05	0.000164235	Zfp260	protein_coding
ENSMUSG00000015290	2225.05	2010.77	2439.32	-0.279617	0.0614369	-4.4014	1.07554e-05	0.000165126	Ubl4a	protein_coding
ENSMUSG00000012126	485.178	591.435	378.921	0.579488	0.118132	4.39731	1.09603e-05	0.000168127	Ubxn11	protein_coding
ENSMUSG00000034973	3672.62	4070.03	3275.21	0.320638	0.070452	4.39673	1.09894e-05	0.000168429	Dopey1	protein_coding
ENSMUSG00000096929	1250.85	987.76	1513.94	-0.526616	0.103359	-4.39542	1.10558e-05	0.0001693	A330023F24Rik	lincRNA
ENSMUSG00000040797	7070.52	7759.07	6381.97	0.31577	0.0709533	4.39507	1.10735e-05	0.000169424	Iqsec3	protein_coding
ENSMUSG00000068037	262.743	165.118	360.368	-0.879141	0.173619	-4.39322	1.11686e-05	0.000170716	Mas1	protein_coding
ENSMUSG00000025328	21.7005	33.8756	9.52539	1.02502	0.208766	4.39305	1.11771e-05	0.000170716	Padi3	protein_coding
ENSMUSG00000034918	100.58	133.481	67.6796	0.805487	0.162784	4.39285	1.11875e-05	0.000170727	Cdhr2	protein_coding
ENSMUSG00000031428	12921.6	11167.9	14675.3	-0.33966	0.0710457	-4.39245	1.12082e-05	0.000170896	Zcchc18	protein_coding
ENSMUSG00000008206	3356.47	2949.21	3763.72	-0.39985	0.0916811	-4.39118	1.12737e-05	0.000171747	Cers4	protein_coding
ENSMUSG00000034488	4841.88	3992.94	5690.81	-0.46756	0.0966983	-4.38854	1.14117e-05	0.0001737	Edil3	protein_coding
ENSMUSG00000018287	1998.26	2242.61	1753.91	0.338383	0.0729182	4.38834	1.1422e-05	0.000173709	Spag7	protein_coding
ENSMUSG00000031027	217.488	271.32	163.657	0.644121	0.13261	4.38813	1.14327e-05	0.000173722	Stk33	protein_coding
ENSMUSG00000007279	147.721	187.859	107.584	0.694078	0.14732	4.38626	1.15315e-05	0.000175074	Scube2	protein_coding
ENSMUSG00000036086	555.944	622.85	489.038	0.380986	0.0855573	4.38553	1.15706e-05	0.000175517	Zranb3	protein_coding
ENSMUSG00000040325	1644.61	1822.7	1466.51	0.331386	0.0736222	4.38467	1.16161e-05	0.000176057	Dcaf1	protein_coding
ENSMUSG00000032109	201.612	240.537	162.687	0.544724	0.119244	4.38368	1.16693e-05	0.000176712	Nlrx1	protein_coding
ENSMUSG00000024486	904.905	760.182	1049.63	-0.418965	0.0872021	-4.38343	1.16823e-05	0.000176759	Hbegf	protein_coding
ENSMUSG00000034480	909.217	749.95	1068.48	-0.450969	0.09215	-4.38146	1.17889e-05	0.00017822	Diaph2	protein_coding
ENSMUSG00000031907	1226.07	1096.74	1355.41	-0.339889	0.076622	-4.38104	1.18116e-05	0.00017841	Zfp90	protein_coding
ENSMUSG00000026639	203.996	250.015	157.976	0.619578	0.137069	4.37926	1.19083e-05	0.000179718	Lamb3	protein_coding
ENSMUSG00000049353	30.7476	44.9287	16.5664	0.793309	0.210423	4.37455	1.21685e-05	0.000183488	Rd3	protein_coding
ENSMUSG00000009090	6740.93	7593.03	5888.82	0.399271	0.0909967	4.37152	1.23385e-05	0.000185895	Ap1b1	protein_coding
ENSMUSG00000059891	26.1676	38.6948	13.6403	0.925978	0.20539	4.37049	1.23968e-05	0.000186615	Tsks	protein_coding
ENSMUSG00000078453	266.482	215.222	317.741	-0.560827	0.128037	-4.36975	1.24388e-05	0.000186964	Abracl	protein_coding
ENSMUSG00000037408	631.088	710.942	551.234	0.408919	0.0936261	4.36971	1.24411e-05	0.000186964	Cnnm4	protein_coding
ENSMUSG00000022435	38.0262	54.7931	21.2594	0.937835	0.196659	4.3694	1.24587e-05	0.00018707	Upk3a	protein_coding
ENSMUSG00000049225	3376.44	2882.47	3870.4	-0.41262	0.0885621	-4.36853	1.25084e-05	0.000187658	Pdp1	protein_coding
ENSMUSG00000059149	1090.72	1238.12	943.322	0.384774	0.0834864	4.36791	1.25442e-05	0.000188036	Mfsd4a	protein_coding
ENSMUSG00000031391	12667.4	10590.2	14744.5	-0.41879	0.0862697	-4.36634	1.26345e-05	0.000189229	L1cam	protein_coding
ENSMUSG00000054383	160.133	117.881	202.385	-0.680365	0.13954	-4.36597	1.2656e-05	0.000189392	Pnma1	protein_coding
ENSMUSG00000036202	3147.72	3600.47	2694.96	0.395155	0.0844372	4.36525	1.26977e-05	0.000189855	Rif1	protein_coding
ENSMUSG00000097311	145.156	102.917	187.395	-0.742909	0.158312	-4.36312	1.28221e-05	0.000191554		lincRNA
ENSMUSG00000030138	2541.51	2791.81	2291.21	0.280114	0.0618834	4.36016	1.29967e-05	0.000193999	Bms1	protein_coding
ENSMUSG00000049422	2933	2593.55	3272.45	-0.370305	0.0841336	-4.35962	1.30289e-05	0.000194317	Chchd10	protein_coding
ENSMUSG00000053310	10499.2	6817.87	14180.5	-0.84048	0.16762	-4.35817	1.31152e-05	0.000195276	Nrgn	protein_coding
ENSMUSG00000086425	72.8059	96.0902	49.5215	0.782097	0.165238	4.35825	1.31109e-05	0.000195276		lincRNA
ENSMUSG00000047793	1950.02	2257.36	1642.68	0.419122	0.0881946	4.3533	1.34101e-05	0.000199499	Sned1	protein_coding
ENSMUSG00000005089	81685.8	71392.4	91979.1	-0.331318	0.0710493	-4.35169	1.3509e-05	0.000200802	Slc1a2	protein_coding
ENSMUSG00000069184	442.142	368.235	516.049	-0.476482	0.103004	-4.35023	1.35993e-05	0.000201975	Zfp72	protein_coding
ENSMUSG00000044629	4041.39	3467.34	4615.44	-0.413001	0.0900285	-4.3497	1.36326e-05	0.000202301	Cnrip1	protein_coding
ENSMUSG00000033216	617.193	701.866	532.52	0.406177	0.0898801	4.34868	1.3696e-05	0.000203072	Eefsec	protein_coding
ENSMUSG00000031104	717.149	612.314	821.985	-0.427874	0.0945414	-4.3474	1.37763e-05	0.000203752	Rab33a	protein_coding
ENSMUSG00000040133	700.102	586.085	814.118	-0.407488	0.0841437	-4.34756	1.37661e-05	0.000203752	Gpr176	protein_coding
ENSMUSG00000092274	1346.6	1506.6	1186.59	0.328395	0.0716331	4.34772	1.37562e-05	0.000203752	Neat1	lincRNA
ENSMUSG00000035121	112.146	139.86	84.4331	0.659149	0.144211	4.34625	1.38484e-05	0.000204647	Neil2	protein_coding
ENSMUSG00000115311	39.6539	55.4817	23.8261	0.861733	0.193395	4.34588	1.38721e-05	0.000204827
ENSMUSG00000047721	776.74	680.555	872.925	-0.404964	0.0931471	-4.34515	1.39182e-05	0.000205337	Bola2	protein_coding
ENSMUSG00000025815	632.478	729.936	535.02	0.433156	0.0934429	4.34439	1.39662e-05	0.000205875	Dhtkd1	protein_coding
ENSMUSG00000049583	11203.3	9400.17	13006.5	-0.442316	0.0939882	-4.34418	1.39796e-05	0.0002059	Grm5	protein_coding
ENSMUSG00000027896	222.404	174.303	270.505	-0.558222	0.113864	-4.34051	1.42154e-05	0.0002092	Slc16a4	protein_coding
ENSMUSG00000090121	29.8662	45.5151	14.2173	1.01065	0.205248	4.33839	1.43528e-05	0.000211046	Abhd12b	protein_coding
ENSMUSG00000043872	559.577	485.544	633.611	-0.389163	0.086196	-4.33791	1.43843e-05	0.000211334	Zmym1	protein_coding
ENSMUSG00000037996	9407.55	8092.37	10722.7	-0.371937	0.0794434	-4.33681	1.44564e-05	0.000212219	Slc24a2	protein_coding
ENSMUSG00000033669	371.624	322.447	420.801	-0.421759	0.0968295	-4.33596	1.45125e-05	0.000212866	Zfp7	protein_coding
ENSMUSG00000027199	5056.78	4477.62	5635.94	-0.338056	0.0750895	-4.33522	1.45613e-05	0.000213405	Gatm	protein_coding
ENSMUSG00000035580	167.267	134.525	200.008	-0.561581	0.128698	-4.33461	1.46021e-05	0.000213662	Kcnh8	protein_coding
ENSMUSG00000027977	1651.12	1521.02	1781.21	-0.281618	0.0652262	-4.3346	1.46029e-05	0.000213662	Ndst3	protein_coding
ENSMUSG00000032621	6073.01	6612.74	5533.27	0.265692	0.0596206	4.33428	1.46235e-05	0.000213788	Srek1	protein_coding
ENSMUSG00000027329	646.565	557	736.13	-0.40528	0.0893421	-4.33395	1.46458e-05	0.000213872	Spef1	protein_coding
ENSMUSG00000067194	10244.5	9002.36	11486.6	-0.364093	0.0807848	-4.33384	1.46534e-05	0.000213872	Eif1ax	protein_coding
ENSMUSG00000029364	8088.5	7059.86	9117.15	-0.387614	0.0865334	-4.33331	1.46885e-05	0.000214208	Wsb2	protein_coding
ENSMUSG00000021171	2549.31	2261.11	2837.52	-0.290665	0.0631386	-4.33264	1.47332e-05	0.000214684	Esyt2	protein_coding
ENSMUSG00000022048	9268.92	7507.56	11030.3	-0.479888	0.0971851	-4.32727	1.50971e-05	0.000219806	Dpysl2	protein_coding
ENSMUSG00000067889	16752.1	13426.3	20077.9	-0.540778	0.114201	-4.32614	1.51748e-05	0.000220756	Sptbn2	protein_coding
ENSMUSG00000032271	54.3868	30.8311	77.9425	-0.93063	0.195178	-4.32565	1.52085e-05	0.000221064	Nnmt	protein_coding
ENSMUSG00000097164	894.149	1029.41	758.885	0.427077	0.0930571	4.32542	1.52241e-05	0.00022111		lincRNA
ENSMUSG00000059588	578.74	484.8	672.681	-0.427818	0.0900595	-4.32398	1.53237e-05	0.000222375	Calcrl	protein_coding
ENSMUSG00000003309	110.001	139.646	80.3562	0.688526	0.146298	4.32326	1.53744e-05	0.000222929	Ap1m2	protein_coding
ENSMUSG00000066705	9414.1	8209.19	10619	-0.369121	0.0810809	-4.3222	1.54478e-05	0.000223628	Fxyd6	protein_coding
ENSMUSG00000039354	2268.85	2508.34	2029.35	0.324029	0.0731191	4.32222	1.54466e-05	0.000223628	Smarcal1	protein_coding
ENSMUSG00000028048	1211.13	1066.12	1356.15	-0.347061	0.0770457	-4.31943	1.56434e-05	0.000226274	Gba	protein_coding
ENSMUSG00000036672	749.668	666.836	832.5	-0.351533	0.0801389	-4.31634	1.58636e-05	0.000229273	Cenpt	protein_coding
ENSMUSG00000040669	3208.65	3554.24	2863.05	0.301124	0.0666143	4.3159	1.58951e-05	0.000229541	Phc1	protein_coding
ENSMUSG00000020521	856.195	737.747	974.643	-0.404912	0.0894257	-4.31437	1.60057e-05	0.00023095	Rnft1	protein_coding
ENSMUSG00000014550	2957.4	3201.23	2713.58	0.257987	0.0587037	4.31307	1.61006e-05	0.000232131	Rbsn	protein_coding
ENSMUSG00000074646	76.1238	101.43	50.817	0.800523	0.162939	4.31289	1.61137e-05	0.000232131	6430550D23Rik	protein_coding
ENSMUSG00000030089	414.037	485.224	342.85	0.469961	0.100569	4.31256	1.61376e-05	0.000232287	Slc41a3	protein_coding
ENSMUSG00000039114	4535.7	3723.19	5348.2	-0.490325	0.104939	-4.30886	1.64096e-05	0.000235819	Nrn1	protein_coding
ENSMUSG00000022265	5229.46	4686.83	5772.09	-0.280412	0.0620087	-4.30898	1.64006e-05	0.000235819	Ank	protein_coding
ENSMUSG00000030894	2921.85	3189.28	2654.42	0.315913	0.0736787	4.30647	1.65877e-05	0.000238187	Tpp1	protein_coding
ENSMUSG00000028047	1182.51	996.318	1368.71	-0.458415	0.101334	-4.3057	1.66456e-05	0.000238824	Thbs3	protein_coding
ENSMUSG00000026824	2813.44	2449.15	3177.74	-0.36355	0.0796385	-4.30525	1.66795e-05	0.000239118	Kcnj3	protein_coding
ENSMUSG00000018678	525.203	617.099	433.308	0.500313	0.112456	4.30397	1.67766e-05	0.000240316	Sp2	protein_coding
ENSMUSG00000031242	4453.23	3987.64	4918.83	-0.288217	0.0638718	-4.30377	1.67915e-05	0.000240336	2610002M06Rik	protein_coding
ENSMUSG00000019966	4083.95	3374.14	4793.76	-0.469522	0.0992736	-4.3033	1.68276e-05	0.000240566	Kitl	protein_coding
ENSMUSG00000006442	1402.07	1207.5	1596.64	-0.40137	0.0889898	-4.3032	1.68348e-05	0.000240566	Srm	protein_coding
ENSMUSG00000061013	249.794	201.224	298.364	-0.540603	0.118054	-4.30235	1.68997e-05	0.0002413	Mkx	protein_coding
ENSMUSG00000019984	1698.88	1870.2	1527.57	0.29961	0.0674878	4.30164	1.69541e-05	0.000241883	Med23	protein_coding
ENSMUSG00000061032	10769.5	11702.8	9836.26	0.282647	0.0649427	4.30112	1.69936e-05	0.000242251	Rrp1	protein_coding
ENSMUSG00000031860	531.333	613.112	449.553	0.415825	0.0891624	4.30032	1.70551e-05	0.000242932	Pbx4	protein_coding
ENSMUSG00000028771	2111.1	1907.29	2314.91	-0.280791	0.0631393	-4.29939	1.71265e-05	0.000243754	Ptpn12	protein_coding
ENSMUSG00000085148	544.45	453.537	635.362	-0.474224	0.103899	-4.29881	1.71715e-05	0.000244199	Mir22hg	processed_transcript
ENSMUSG00000068876	622.248	476.604	767.892	-0.601662	0.123327	-4.29716	1.72999e-05	0.000245604	Cgn	protein_coding
ENSMUSG00000026200	908.748	1024.32	793.179	0.364722	0.0806929	4.29701	1.73118e-05	0.000245604	Glb1l	protein_coding
ENSMUSG00000043993	191.665	234.192	149.139	0.580226	0.120582	4.29713	1.73025e-05	0.000245604		processed_transcript
ENSMUSG00000037411	101.693	129.27	74.1152	0.684868	0.16397	4.29649	1.73526e-05	0.000245985	Serpine1	protein_coding
ENSMUSG00000036873	1173.45	1052.72	1294.17	-0.34361	0.0794714	-4.29588	1.74e-05	0.000246461	2410004B18Rik	protein_coding
ENSMUSG00000030615	945.258	799.844	1090.67	-0.447726	0.0989772	-4.29512	1.74603e-05	0.000247117	Tmem126a	protein_coding
ENSMUSG00000041939	1165.21	996.381	1334.04	-0.410764	0.0901102	-4.29409	1.75408e-05	0.00024806	Mvk	protein_coding
ENSMUSG00000033444	3983.27	4347.78	3618.76	0.281301	0.0640311	4.29377	1.75663e-05	0.000248222	Specc1l	protein_coding
ENSMUSG00000020527	855.153	746.981	963.324	-0.388697	0.0885176	-4.29259	1.76597e-05	0.000249343	Myo19	protein_coding
ENSMUSG00000097466	198.334	139.893	256.775	-0.738635	0.160951	-4.29214	1.76961e-05	0.000249659	D430036J16Rik	antisense
ENSMUSG00000108607	66.763	90.7254	42.8006	0.841497	0.16896	4.29028	1.78451e-05	0.000251561
ENSMUSG00000029174	1319.79	1503.1	1136.49	0.409856	0.0918864	4.28951	1.79069e-05	0.000252231	Tbc1d1	protein_coding
ENSMUSG00000017716	164.943	126.829	203.057	-0.610897	0.131249	-4.28903	1.79451e-05	0.000252503	Birc5	protein_coding
ENSMUSG00000003062	1898.86	1660.84	2136.88	-0.354588	0.0782098	-4.28892	1.79546e-05	0.000252503	Stard3nl	protein_coding
ENSMUSG00000035910	660.856	742.343	579.369	0.373237	0.0845209	4.28711	1.81013e-05	0.000254364	Dcdc2a	protein_coding
ENSMUSG00000044937	156.762	192.2	121.324	0.6013	0.129605	4.28369	1.83823e-05	0.000258108	Ttc41	protein_coding
ENSMUSG00000037788	3799.68	3138.92	4460.43	-0.460024	0.0970982	-4.28023	1.86704e-05	0.000261947	Vopp1	protein_coding
ENSMUSG00000061755	6102.86	6824.52	5381.2	0.352314	0.0795582	4.27962	1.87216e-05	0.000262458	Bod1l	protein_coding
ENSMUSG00000026807	102.201	130.195	74.2073	0.697147	0.149155	4.27878	1.87919e-05	0.000263235	Ak8	protein_coding
ENSMUSG00000030730	72.0953	100.752	43.4387	0.895567	0.180891	4.27751	1.88999e-05	0.00026454	Atp2a1	protein_coding
ENSMUSG00000092203	397.215	342.831	451.6	-0.44236	0.104641	-4.27679	1.89609e-05	0.000265184	1110038B12Rik	processed_transcript
ENSMUSG00000019689	422.136	348.563	495.709	-0.49816	0.110389	-4.27573	1.9051e-05	0.000266234	Fmc1	protein_coding
ENSMUSG00000020591	4795.16	5348.61	4241.71	0.315578	0.0698392	4.27366	1.92289e-05	0.000268508	Ntsr2	protein_coding
ENSMUSG00000015083	81.9071	108.028	55.7866	0.779303	0.167123	4.27349	1.9244e-05	0.000268508	C8g	protein_coding
ENSMUSG00000029634	2432.09	2648.97	2215.22	0.284739	0.0655638	4.2708	1.94769e-05	0.000271545	Rnf6	protein_coding
ENSMUSG00000038242	196.654	127.048	266.261	-0.805322	0.187694	-4.26959	1.95836e-05	0.00027239	Aox4	protein_coding
ENSMUSG00000022309	718.24	613.958	822.521	-0.407812	0.0894742	-4.26986	1.95597e-05	0.00027239	Angpt1	protein_coding
ENSMUSG00000032011	18659.3	16651.9	20666.7	-0.301163	0.0673374	-4.26962	1.95807e-05	0.00027239	Thy1	protein_coding
ENSMUSG00000038605	1361.46	1190.28	1532.64	-0.374183	0.0846553	-4.26767	1.97522e-05	0.000274113	Samd10	protein_coding
ENSMUSG00000063511	18351.5	20156.3	16546.8	0.254893	0.0568261	4.26799	1.97246e-05	0.000274113	Snrnp70	protein_coding
ENSMUSG00000066406	2925.82	3340.39	2511.25	0.390708	0.0852554	4.26763	1.97556e-05	0.000274113	Akap13	protein_coding
ENSMUSG00000025783	18.8784	33.2734	4.48349	1.15766	0.211228	4.26748	1.97693e-05	0.000274113		protein_coding
ENSMUSG00000021665	3397.69	3055.15	3740.22	-0.326124	0.0752493	-4.26725	1.97899e-05	0.000274185	Hexb	protein_coding
ENSMUSG00000104362	732.332	582.352	882.312	-0.556148	0.118982	-4.26671	1.9838e-05	0.000274423		TEC
ENSMUSG00000086370	1424.96	1236.44	1613.47	-0.39452	0.0890446	-4.26672	1.9837e-05	0.000274423	Ftx	lincRNA
ENSMUSG00000031628	2142.76	1931.6	2353.92	-0.306229	0.0700597	-4.26531	1.99623e-05	0.000275928	Casp3	protein_coding
ENSMUSG00000006589	764.085	649.472	878.699	-0.446897	0.100883	-4.26475	2.00128e-05	0.00027641	Aprt	protein_coding
ENSMUSG00000104868	431.243	345.947	516.54	-0.506756	0.104521	-4.26433	2.00498e-05	0.000276707
ENSMUSG00000021811	962.61	865.595	1059.62	-0.315381	0.0724723	-4.26248	2.0217e-05	0.000278796	Dnajc9	protein_coding
ENSMUSG00000071691	213.737	261.772	165.703	0.580391	0.120509	4.2623	2.02335e-05	0.000278807	Gm960	protein_coding
ENSMUSG00000030465	16306.1	13953.9	18658.3	-0.392622	0.0852872	-4.25906	2.05293e-05	0.000282663	Psd3	protein_coding
ENSMUSG00000008575	5316.58	4629.1	6004.06	-0.353636	0.0777197	-4.25844	2.0586e-05	0.000283008	Nfib	protein_coding
ENSMUSG00000022536	9353.74	9978.07	8729.4	0.218089	0.0506552	4.25842	2.05881e-05	0.000283008	Glyr1	protein_coding
ENSMUSG00000015377	3660.04	4179.7	3140.37	0.415799	0.0931617	4.25826	2.06021e-05	0.000283008	Dennd6b	protein_coding
ENSMUSG00000042816	175.013	213.383	136.644	0.599246	0.139841	4.2571	2.07099e-05	0.000284269	Gpr151	protein_coding
ENSMUSG00000025128	1328.82	933.195	1724.45	-0.740989	0.148247	-4.25685	2.07323e-05	0.000284356	Bhlhe22	protein_coding
ENSMUSG00000030093	677.463	546.115	808.812	-0.526152	0.113414	-4.25577	2.08331e-05	0.000285518	Wnt7a	protein_coding
ENSMUSG00000029592	1841.43	2030.6	1652.25	0.334214	0.0778486	4.25539	2.08683e-05	0.000285779	Usp30	protein_coding
ENSMUSG00000004328	583.396	713.911	452.881	0.593732	0.127488	4.25494	2.09108e-05	0.000286141	Hif3a	protein_coding
ENSMUSG00000030108	660.475	760.875	560.075	0.464256	0.109961	4.25447	2.09541e-05	0.000286512	Slc6a13	protein_coding
ENSMUSG00000025583	2770.06	3036.18	2503.93	0.336857	0.080545	4.25384	2.10136e-05	0.000287104	Rptor	protein_coding
ENSMUSG00000031299	13114.8	11749.2	14480.4	-0.272496	0.0607138	-4.2529	2.11018e-05	0.000288089	Pdha1	protein_coding
ENSMUSG00000020737	1918.25	1522.31	2314.18	-0.559969	0.121008	-4.25164	2.12208e-05	0.000289491	Jpt1	protein_coding
ENSMUSG00000060512	269.87	213.288	326.452	-0.574466	0.126014	-4.25058	2.13219e-05	0.000290647	0610040J01Rik	protein_coding
ENSMUSG00000026662	3161.83	3509.14	2814.51	0.286987	0.0637258	4.24945	2.14296e-05	0.000291889	Sephs1	protein_coding
ENSMUSG00000032366	8580.38	7938.1	9222.66	-0.234064	0.0541394	-4.24906	2.14668e-05	0.000292172	Tpm1	protein_coding
ENSMUSG00000032777	5859.18	6488.47	5229.89	0.3471	0.0811171	4.24749	2.16183e-05	0.000294009	Gtf3c1	protein_coding
ENSMUSG00000032549	35560.2	31890	39230.5	-0.26375	0.0587474	-4.2468	2.16846e-05	0.000294009	Rab6b	protein_coding
ENSMUSG00000062661	8393.86	7663.08	9124.64	-0.236405	0.0536481	-4.2469	2.16752e-05	0.000294009	Ncs1	protein_coding
ENSMUSG00000043065	676.21	770.597	581.823	0.400498	0.0895098	4.24712	2.16537e-05	0.000294009	Spice1	protein_coding
ENSMUSG00000022766	174.824	213.968	135.679	0.606302	0.146326	4.24701	2.16647e-05	0.000294009	Serpind1	protein_coding
ENSMUSG00000071265	718.033	554.539	881.527	-0.600983	0.126426	-4.24544	2.18166e-05	0.000295573	1700086L19Rik	lincRNA
ENSMUSG00000040359	2172.12	2375.23	1969	0.291523	0.067237	4.24484	2.18746e-05	0.000296002	Ufl1	protein_coding
ENSMUSG00000027778	1334.59	1495.38	1173.81	0.343781	0.077108	4.24477	2.18816e-05	0.000296002	Ift80	protein_coding
ENSMUSG00000028224	1015.04	1141.4	888.675	0.358754	0.0806934	4.24307	2.20482e-05	0.000298028	Nbn	protein_coding
ENSMUSG00000030344	38.8887	54.0731	23.7044	0.854525	0.191602	4.24103	2.22492e-05	0.000300516	Akap3	protein_coding
ENSMUSG00000029449	1429.17	1205.2	1653.15	-0.40579	0.0868634	-4.23896	2.24556e-05	0.000302843	Rhof	protein_coding
ENSMUSG00000017176	1922.06	1739.64	2104.49	-0.318936	0.0747021	-4.23908	2.24435e-05	0.000302843	Nt5c3b	protein_coding
ENSMUSG00000108616	892.01	681.915	1102.11	-0.628007	0.138579	-4.23759	2.25933e-05	0.000304469
ENSMUSG00000057497	819.058	703.795	934.32	-0.413492	0.0931392	-4.23697	2.26556e-05	0.000305077	Fam136a	protein_coding
ENSMUSG00000073234	22.1302	10.2323	34.0281	-0.885093	0.211571	-4.23659	2.26941e-05	0.000305364	Gm8773	protein_coding
ENSMUSG00000061654	488.468	403.966	572.97	-0.445481	0.0942301	-4.23498	2.28571e-05	0.000307324	Spry3	protein_coding
ENSMUSG00000027384	1390.74	1231.69	1549.79	-0.366733	0.0853415	-4.23328	2.3031e-05	0.000309337	Ndufaf5	protein_coding
ENSMUSG00000023972	808.246	909.897	706.596	0.378156	0.08664	4.23317	2.30417e-05	0.000309337	Ptk7	protein_coding
ENSMUSG00000021044	1603.98	1762.06	1445.9	0.293705	0.0672	4.23259	2.31012e-05	0.000309902	Adck1	protein_coding
ENSMUSG00000050071	2338.15	2071.15	2605.15	-0.345053	0.0787272	-4.23238	2.31229e-05	0.000309958	Bex1	protein_coding
ENSMUSG00000006464	2744.39	2997.11	2491.67	0.300475	0.070192	4.23071	2.32952e-05	0.000312033	Bbs1	protein_coding
ENSMUSG00000054675	429.578	359.065	500.091	-0.469597	0.105248	-4.23024	2.33446e-05	0.000312458	Tmem119	protein_coding
ENSMUSG00000028886	1697.24	1870.36	1524.12	0.297665	0.0678473	4.22994	2.33751e-05	0.000312632	Eya3	protein_coding
ENSMUSG00000021223	170.774	134.589	206.958	-0.589765	0.141528	-4.22929	2.34428e-05	0.0003133	Papln	protein_coding
ENSMUSG00000044149	1833.14	1509.85	2156.43	-0.461132	0.097913	-4.22756	2.36235e-05	0.000315478	Nkrf	protein_coding
ENSMUSG00000051652	1164.15	1001.28	1327.01	-0.379054	0.083337	-4.22654	2.37308e-05	0.000316672	Lrrc3	protein_coding
ENSMUSG00000006699	14935.1	13588.1	16282	-0.285439	0.0661564	-4.22445	2.39521e-05	0.000319386	Cdc42	protein_coding
ENSMUSG00000070337	255.49	335.747	175.232	0.760022	0.162169	4.22366	2.40367e-05	0.000320272	Gpr179	protein_coding
ENSMUSG00000079641	588.018	469.434	706.601	-0.562466	0.125333	-4.22319	2.40869e-05	0.000320701	Rpl39	protein_coding
ENSMUSG00000000305	3802.38	4239.21	3365.55	0.370337	0.0874815	4.22167	2.42495e-05	0.000322623	Cdh4	protein_coding
ENSMUSG00000051811	204.182	250.403	157.961	0.600555	0.131869	4.22078	2.4346e-05	0.000323665	Cox6b2	protein_coding
ENSMUSG00000013495	1641.09	1809.52	1472.65	0.302033	0.0690157	4.22032	2.4396e-05	0.000324087	Tmem175	protein_coding
ENSMUSG00000017664	1647.87	1787.08	1508.66	0.286452	0.0676078	4.21694	2.47635e-05	0.000328723	Slc35c2	protein_coding
ENSMUSG00000039294	901.721	787.793	1015.65	-0.354747	0.0796833	-4.21676	2.47834e-05	0.000328741	BC017643	protein_coding
ENSMUSG00000044037	981.077	1083.17	878.984	0.31983	0.074007	4.21596	2.48723e-05	0.000329674	Als2cl	protein_coding
ENSMUSG00000024013	532.234	663.979	400.488	0.639534	0.133215	4.21557	2.49148e-05	0.000329991	Fgd2	protein_coding
ENSMUSG00000023764	795.53	971.422	619.637	0.577237	0.120747	4.21395	2.5094e-05	0.000332117	Sfi1	protein_coding
ENSMUSG00000061298	674.025	771.203	576.846	0.435952	0.10132	4.21308	2.51916e-05	0.00033316	Agbl4	protein_coding
ENSMUSG00000018765	4059.41	4490.45	3628.38	0.336828	0.0787906	4.21232	2.5276e-05	0.000334027	Fxr2	protein_coding
ENSMUSG00000022311	2190.86	1881.27	2500.45	-0.367465	0.0800177	-4.21126	2.53951e-05	0.000335351	Csmd3	protein_coding
ENSMUSG00000090946	697.633	595.396	799.87	-0.42319	0.0951622	-4.20999	2.55379e-05	0.000336986	Ccdc71l	protein_coding
ENSMUSG00000034009	869.489	486.636	1252.34	-0.90244	0.200254	-4.20978	2.55624e-05	0.000337059	Rxfp1	protein_coding
ENSMUSG00000024953	6098.18	5636.11	6560.26	-0.251221	0.0590488	-4.20793	2.57723e-05	0.000339574	Prdx5	protein_coding
ENSMUSG00000029053	4250.46	3825.96	4674.97	-0.288887	0.0660932	-4.20693	2.58866e-05	0.000340827	Prkcz	protein_coding
ENSMUSG00000005583	8603.93	6184.33	11023.5	-0.696926	0.137346	-4.20298	2.63421e-05	0.000346568	Mef2c	protein_coding
ENSMUSG00000026000	3938.46	4192.99	3683.94	0.246177	0.0591664	4.20171	2.64911e-05	0.00034827	Lancl1	protein_coding
ENSMUSG00000027715	615.9	522.604	709.195	-0.410985	0.0905013	-4.20151	2.65146e-05	0.000348321	Ccna2	protein_coding
ENSMUSG00000042388	6142.91	5240.93	7044.88	-0.434676	0.0996222	-4.20088	2.65875e-05	0.00034902	Dlgap3	protein_coding
ENSMUSG00000033849	2339.03	1985.11	2692.96	-0.434422	0.0973635	-4.19901	2.68079e-05	0.000351398	B3galt2	protein_coding
ENSMUSG00000028291	2161.1	1934.87	2387.32	-0.289742	0.0657979	-4.19901	2.68082e-05	0.000351398	Akirin2	protein_coding
ENSMUSG00000004837	273.325	222.907	323.742	-0.510103	0.114164	-4.19774	2.6959e-05	0.000353114	Grap	protein_coding
ENSMUSG00000021763	408.408	477.229	339.587	0.477622	0.108154	4.19741	2.69981e-05	0.000353365	BC067074	protein_coding
ENSMUSG00000038628	2160.89	1921.12	2400.66	-0.324007	0.0739558	-4.19716	2.70288e-05	0.000353506	Polr3k	protein_coding
ENSMUSG00000025371	1214.65	1340.71	1088.6	0.300981	0.0689852	4.19605	2.71614e-05	0.000354978	Chmp6	protein_coding
ENSMUSG00000020297	30394.4	27103.7	33685.1	-0.304152	0.0690515	-4.19528	2.72529e-05	0.000355913	Nsg2	protein_coding
ENSMUSG00000020101	1020.5	882.545	1158.45	-0.385375	0.0870899	-4.19397	2.74112e-05	0.000357716	Vsir	protein_coding
ENSMUSG00000035151	1856.61	2053.65	1659.57	0.280424	0.0633411	4.19267	2.75695e-05	0.000359518	Elmod2	protein_coding
ENSMUSG00000030323	1576.11	1766.91	1385.31	0.373881	0.0872566	4.19116	2.77533e-05	0.000361649	Ift122	protein_coding
ENSMUSG00000026820	1117.44	994.866	1240.01	-0.340645	0.0796312	-4.19025	2.78652e-05	0.00036284	Ptges2	protein_coding
ENSMUSG00000075334	1993.71	1661.21	2326.22	-0.410762	0.0866599	-4.18901	2.80175e-05	0.000364557	Rprm	protein_coding
ENSMUSG00000050050	91.0512	119.772	62.3306	0.760695	0.161867	4.18867	2.80591e-05	0.00036483	Ccdc158	protein_coding
ENSMUSG00000037993	1396.44	1588.31	1204.58	0.426559	0.102338	4.18812	2.81274e-05	0.000365381	Dhx38	protein_coding
ENSMUSG00000044641	265.718	326.916	204.519	0.586343	0.121377	4.188	2.81427e-05	0.000365381	Pard6b	protein_coding
ENSMUSG00000003814	18369.7	16232	20507.5	-0.299802	0.066898	-4.18774	2.81749e-05	0.000365532	Calr	protein_coding
ENSMUSG00000022292	1188.99	1041.21	1336.77	-0.359102	0.0815888	-4.18675	2.82972e-05	0.00036685	Rrm2b	protein_coding
ENSMUSG00000023904	3274.53	2974.7	3574.35	-0.287871	0.0674482	-4.1856	2.84408e-05	0.000368444	Hcfc1r1	protein_coding
ENSMUSG00000037108	589.696	681.796	497.595	0.418428	0.0918314	4.18542	2.84638e-05	0.000368472	Zcwpw1	protein_coding
ENSMUSG00000029055	3502.15	3947.71	3056.58	0.339184	0.0754861	4.18465	2.85602e-05	0.000369182	Plch2	protein_coding
ENSMUSG00000036928	550.201	638.795	461.608	0.444216	0.0982945	4.18469	2.85554e-05	0.000369182	Stag3	protein_coding
ENSMUSG00000022321	2208.98	1911.47	2506.49	-0.362581	0.0806014	-4.18361	2.86912e-05	0.000370604	Cdh10	protein_coding
ENSMUSG00000097595	57.8057	80.8718	34.7395	0.894304	0.184755	4.18248	2.88344e-05	0.000372184		lincRNA
ENSMUSG00000032869	1653.72	1830.46	1476.98	0.321626	0.0745082	4.18091	2.90341e-05	0.00037449	Psmf1	protein_coding
ENSMUSG00000030695	16889	14906.5	18871.4	-0.313856	0.0705131	-4.18072	2.90594e-05	0.000374543	Aldoa	protein_coding
ENSMUSG00000046380	482.698	553.437	411.96	0.408169	0.0915566	4.1794	2.92285e-05	0.000376449	Jrk	protein_coding
ENSMUSG00000032418	2453.75	2146.87	2760.63	-0.36032	0.0821141	-4.17773	2.94428e-05	0.000378934	Me1	protein_coding
ENSMUSG00000069094	2140.58	1951.62	2329.55	-0.262208	0.0610301	-4.17696	2.95437e-05	0.000379957	Pde7a	protein_coding
ENSMUSG00000024976	3067.9	2796.51	3339.29	-0.26731	0.0622822	-4.17615	2.9648e-05	0.000381022	Shoc2	protein_coding
ENSMUSG00000009640	1010.9	1120.7	901.109	0.341473	0.0803298	4.17553	2.97291e-05	0.000381788	Dmap1	protein_coding
ENSMUSG00000041798	330.955	404.765	257.145	0.587455	0.126569	4.17459	2.98517e-05	0.000383086	Gck	protein_coding
ENSMUSG00000053963	7979.51	6685.38	9273.65	-0.444583	0.0978884	-4.17422	2.99014e-05	0.000383446	Stum	protein_coding
ENSMUSG00000025930	81.8578	61.9548	101.761	-0.640773	0.15651	-4.17379	2.99569e-05	0.000383829	Msc	protein_coding
ENSMUSG00000014245	418.157	485.827	350.487	0.448285	0.100268	4.17366	2.99745e-05	0.000383829	Pigl	protein_coding
ENSMUSG00000044197	590.546	667.942	513.149	0.400519	0.094012	4.17308	3.00514e-05	0.000384536	Gpr146	protein_coding
ENSMUSG00000032532	2231.94	1786.15	2677.73	-0.560199	0.127384	-4.17065	3.03732e-05	0.000388374	Cck	protein_coding
ENSMUSG00000020770	1305.99	1467.2	1144.79	0.353242	0.0805093	4.16935	3.05463e-05	0.000390306	Unk	protein_coding
ENSMUSG00000053411	831.337	975.303	687.371	0.482058	0.108275	4.16918	3.05695e-05	0.000390322	Cbx7	protein_coding
ENSMUSG00000002274	1621.95	1429.91	1813.99	-0.351409	0.0811474	-4.16747	3.07993e-05	0.000392974	Metrn	protein_coding
ENSMUSG00000078700	436.805	372.885	500.724	-0.417542	0.0946718	-4.16552	3.1064e-05	0.000396066	D030028A08Rik	processed_transcript
ENSMUSG00000068323	130.326	177.192	83.4603	0.805028	0.18423	4.16467	3.11809e-05	0.000397271	Slc4a5	protein_coding
ENSMUSG00000027716	1285.71	1126.1	1445.32	-0.350409	0.0796772	-4.1645	3.12041e-05	0.000397281	Trpc3	protein_coding
ENSMUSG00000045969	991.251	888.669	1093.83	-0.326258	0.07673	-4.16396	3.12776e-05	0.000397931	Ing1	protein_coding
ENSMUSG00000008668	756.756	646.424	867.088	-0.434044	0.100677	-4.16182	3.15715e-05	0.000401383	Rps18	protein_coding
ENSMUSG00000005732	2937.32	2714.72	3159.93	-0.268399	0.0644656	-4.16084	3.17073e-05	0.000402821	Ranbp1	protein_coding
ENSMUSG00000085873	337.854	411.189	264.518	0.568256	0.122895	4.1599	3.18384e-05	0.000404198		antisense
ENSMUSG00000022490	3253.93	2792.18	3715.67	-0.437783	0.103518	-4.15885	3.19854e-05	0.000405774	Ppp1r1a	protein_coding
ENSMUSG00000028830	2990.32	3270.46	2710.18	0.304573	0.072463	4.15859	3.2022e-05	0.000405948	AU040320	protein_coding
ENSMUSG00000056596	3109.79	2767.8	3451.79	-0.341409	0.0803687	-4.15717	3.2221e-05	0.000408179	Trnp1	protein_coding
ENSMUSG00000031994	148.729	109.234	188.225	-0.667052	0.141651	-4.15698	3.22477e-05	0.000408225	Adamts8	protein_coding
ENSMUSG00000029681	1116.15	1248.19	984.123	0.339523	0.0779171	4.15529	3.24869e-05	0.000410961	Bcl7b	protein_coding
ENSMUSG00000021268	331668	300063	363273	-0.291785	0.068386	-4.15369	3.27157e-05	0.00041356	Meg3	lincRNA
ENSMUSG00000038366	5105.76	4444.71	5766.82	-0.340038	0.0759037	-4.15228	3.29178e-05	0.000415819	Lasp1	protein_coding
ENSMUSG00000040820	830.08	921.912	738.248	0.374632	0.0924439	4.1484	3.34801e-05	0.000422621	Hlcs	protein_coding
ENSMUSG00000024451	601.284	503.449	699.118	-0.451693	0.102004	-4.14583	3.38586e-05	0.000427095	Arap3	protein_coding
ENSMUSG00000048004	1004.21	808.942	1199.48	-0.520282	0.113442	-4.14533	3.39327e-05	0.000427726	Tmem196	protein_coding
ENSMUSG00000038290	2285.96	2503.9	2068.02	0.317813	0.0765628	4.14405	3.41228e-05	0.000429817	Smg6	protein_coding
ENSMUSG00000004347	806.275	661.936	950.615	-0.462808	0.0995773	-4.14189	3.44458e-05	0.000433578	Pde1c	protein_coding
ENSMUSG00000038957	1281.81	1410.58	1153.04	0.330209	0.0793626	4.13537	3.54378e-05	0.000445747	Edc3	protein_coding
ENSMUSG00000074102	2561.74	2305.1	2818.38	-0.294091	0.068667	-4.13368	3.57008e-05	0.000448737	Rbm15b	protein_coding
ENSMUSG00000020949	7934.09	7096.56	8771.62	-0.331442	0.0782493	-4.13338	3.57463e-05	0.000448991	Fkbp3	protein_coding
ENSMUSG00000096847	4541.88	4054.59	5029.16	-0.296934	0.0683445	-4.13082	3.61469e-05	0.000453703	Tmem151b	protein_coding
ENSMUSG00000047414	2957	2566.89	3347.1	-0.350284	0.0785025	-4.13058	3.61856e-05	0.000453868	Flrt2	protein_coding
ENSMUSG00000017774	1083.17	942.924	1223.42	-0.383251	0.0896989	-4.13027	3.62336e-05	0.000454149	Myo1c	protein_coding
ENSMUSG00000031398	3068.97	2771.4	3366.53	-0.303684	0.0720292	-4.12928	3.639e-05	0.000455787	Plxna3	protein_coding
ENSMUSG00000021820	10557	11733.5	9380.58	0.333125	0.0780203	4.12862	3.64951e-05	0.000456781	Camk2g	protein_coding
ENSMUSG00000007034	15.885	25.5638	6.20625	0.962459	0.211859	4.12835	3.65373e-05	0.000456986	Slc44a4	protein_coding
ENSMUSG00000089857	438.886	367.81	509.961	-0.455284	0.103078	-4.12711	3.67349e-05	0.000459134	Zfp882	protein_coding
ENSMUSG00000049872	128.82	94.0067	163.633	-0.689894	0.151731	-4.12584	3.69392e-05	0.000461363	Fam26e	protein_coding
ENSMUSG00000064337	169002	149050	188954	-0.365978	0.086256	-4.12296	3.74027e-05	0.000466824		Mt_rRNA
ENSMUSG00000039982	3000.04	2667.62	3332.47	-0.29427	0.0672918	-4.12111	3.77059e-05	0.000470277	Dtx4	protein_coding
ENSMUSG00000041769	3208.82	2874.46	3543.17	-0.329584	0.0782112	-4.12049	3.78065e-05	0.000471201	Ppp2r2d	protein_coding
ENSMUSG00000003528	2225.23	1984.29	2466.17	-0.324373	0.0761682	-4.1194	3.79865e-05	0.000473112	Slc25a1	protein_coding
ENSMUSG00000020268	241.797	307.587	176.008	0.681478	0.1563	4.11858	3.81219e-05	0.000474465	Lyrm7	protein_coding
ENSMUSG00000074607	1457.13	1696.82	1217.43	0.479546	0.11498	4.11829	3.81688e-05	0.000474717	Tox2	protein_coding
ENSMUSG00000004996	337.761	285.923	389.598	-0.456892	0.108407	-4.11624	3.85105e-05	0.00047863	Mri1	protein_coding
ENSMUSG00000028756	7363.78	7973.7	6753.87	0.228342	0.0535862	4.11588	3.85698e-05	0.000479032	Pink1	protein_coding
ENSMUSG00000015501	8486.79	7313.48	9660.09	-0.357055	0.0793837	-4.11462	3.87818e-05	0.000481328	Hivep2	protein_coding
ENSMUSG00000028957	2255.1	2501.05	2009.15	0.296403	0.0682584	4.11435	3.8827e-05	0.000481553	Per3	protein_coding
ENSMUSG00000029595	255.749	342.487	169.01	0.796872	0.169825	4.11391	3.89015e-05	0.000482139	Lhx5	protein_coding
ENSMUSG00000001855	1728.46	1952.26	1504.66	0.378731	0.0883368	4.11262	3.91186e-05	0.000484492	Nup214	protein_coding
ENSMUSG00000005125	1038.41	804.614	1272.2	-0.571842	0.120393	-4.11194	3.92355e-05	0.0004856	Ndrg1	protein_coding
ENSMUSG00000059839	466.211	374.572	557.85	-0.518265	0.112607	-4.11168	3.92792e-05	0.000485802	Zfp874b	protein_coding
ENSMUSG00000085925	236.595	278.284	194.906	0.500874	0.117527	4.11126	3.93507e-05	0.000486349	Rtl1	protein_coding
ENSMUSG00000030421	2961.17	3255.85	2666.49	0.296022	0.0695873	4.11091	3.94102e-05	0.000486745	Uri1	protein_coding
ENSMUSG00000038048	312.146	254.111	370.181	-0.527445	0.124457	-4.10962	3.96304e-05	0.000489124	Cntnap5c	protein_coding
ENSMUSG00000028608	2582.29	2886.2	2278.38	0.306453	0.0696114	4.10944	3.96612e-05	0.000489165	0610037L13Rik	protein_coding
ENSMUSG00000025499	3560.4	3138.35	3982.44	-0.374429	0.089676	-4.10749	3.99982e-05	0.000492978	Hras	protein_coding
ENSMUSG00000038775	197.622	235.523	159.722	0.541798	0.127334	4.10672	4.01321e-05	0.000494285	Vill	protein_coding
ENSMUSG00000029765	5351.26	4763.92	5938.59	-0.271571	0.0617992	-4.10525	4.03874e-05	0.000497085	Plxna4	protein_coding
ENSMUSG00000042305	3364.72	2981.47	3747.97	-0.354358	0.0840077	-4.10435	4.0546e-05	0.000498528	Tmem183a	protein_coding
ENSMUSG00000045411	1751.56	1551.53	1951.58	-0.308755	0.0709246	-4.10426	4.05609e-05	0.000498528	2410002F23Rik	protein_coding
ENSMUSG00000062210	905.693	775.579	1035.81	-0.38025	0.0851238	-4.10135	4.10738e-05	0.000504483	Tnfaip8	protein_coding
ENSMUSG00000030380	843.607	1004.25	682.968	0.510855	0.112814	4.10106	4.11254e-05	0.000504768	Mzf1	protein_coding
ENSMUSG00000030002	7690.72	8453.39	6928.04	0.291626	0.0686446	4.1004	4.12435e-05	0.000505867	Dusp11	protein_coding
ENSMUSG00000020027	1106.32	961.075	1251.56	-0.375274	0.0865304	-4.0986	4.15661e-05	0.000509472	Socs2	protein_coding
[truncated: 2,941 more rows]

## Sheet: C-Significant aNSCs
	baseMean	MUT4OHT.Mean	CTRL4OHT.Mean	log2FoldChange	lfcSE	stat	pvalue	padj	symbol	biotype
[truncated: 5,688 more rows]

[truncated: 4 more sheets: D-Significant cortex-striatum, E-Significant all 3 sets, F-GO terms cortex-striatum, G-KEGG cortex-striatum]
