# Supplementary material for: HAT cofactor TRRAP modulates microtubule dynamics via SP1 signaling to prevent neurodegeneration
Source: eLife. 2021 Feb 17;10:e61531. doi: 10.7554/eLife.61531 (PMC7939550; doi:10.7554/eLife.61531)
Supplement: Supplementary file 2. — (A) The list of protein changes after Trrap deletion. (B) The comparison between protein changes (proteomics, q < 0.1) and mRNA changes (transcriptomics, adjusted p-value <0.05). [file elife-61531-supp2.xlsx]

## Sheet: A-Significant proteomics
logFC	AveExpr	t	P.Value	adj.P.Val	B	fdrtool.pval	fdrtool.qval	description	short.name	sub.cell	GO	GO.ID	gene.name	ID
1.48054	14.2658	17.5071	1.55e-10	1.07e-06	14.1309	3.33e-15	2.2e-11	Ras-related protein Rab-26	RAB26_MOUSE	SUBCELLULAR LOCATION: Cytoplasmic vesicle, secretory vesicle membrane {ECO:0000305|PubMed:20038531}; Lipid-anchor {ECO:0000305|PubMed:20038531}; Cytoplasmic side {ECO:0000305|PubMed:20038531}. Golgi apparatus membrane {ECO:0000250|UniProtKB:Q9ULW5}; Lipid-anchor {ECO:0000250|UniProtKB:Q9ULW5}; Cytoplasmic side {ECO:0000250|UniProtKB:Q9ULW5}. Note=Not localized at the plasma membrane (By similarit…	endosome [GO:0005768]; Golgi membrane [GO:0000139]; intrinsic component of plasma membrane [GO:0031226]; plasma membrane [GO:0005886]; secretory granule membrane [GO:0030667]; synaptic vesicle [GO:0008021]; transport vesicle membrane [GO:0030658]; GMP binding [GO:0019002]; GTP binding [GO:0005525]; GTPase activity [GO:0003924]; exocrine system development [GO:0035272]; Golgi to plasma membrane pr…	GO:0000139; GO:0003924; GO:0005525; GO:0005768; GO:0005886; GO:0006904; GO:0008021; GO:0009306; GO:0017157; GO:0019002; GO:0030658; GO:0030667; GO:0031226; GO:0035272; GO:0043001; GO:0045055; GO:0072659	Rab26	Q504M8
0.980821	16.0184	16.2417	4.01e-10	1.39e-06	13.3264	2.8e-13	9.23e-10	Synaptotagmin-12 (Synaptotagmin XII) (SytXII)	SYT12_MOUSE	SUBCELLULAR LOCATION: Cytoplasmic vesicle, secretory vesicle, synaptic vesicle membrane {ECO:0000250}; Single-pass membrane protein {ECO:0000250}.	cell junction [GO:0030054]; integral component of membrane [GO:0016021]; plasma membrane [GO:0005886]; synaptic vesicle membrane [GO:0030672]; calcium ion binding [GO:0005509]; calcium-dependent phospholipid binding [GO:0005544]; clathrin binding [GO:0030276]; syntaxin binding [GO:0019905]; calcium ion-regulated exocytosis of neurotransmitter [GO:0048791]; long-term synaptic potentiation [GO:0060…	GO:0005509; GO:0005544; GO:0005886; GO:0006906; GO:0016021; GO:0017158; GO:0019905; GO:0030054; GO:0030276; GO:0030672; GO:0046928; GO:0048791; GO:0048792; GO:0060291	Syt12	Q920N7
-1.12933	16.832	-15.1606	9.55e-10	2.2e-06	12.5724	3.92e-12	8.61e-09	Tubulin polymerization-promoting protein family member 3	TPPP3_MOUSE	SUBCELLULAR LOCATION: Cytoplasm, cytoskeleton {ECO:0000305}.	microtubule [GO:0005874]; microtubule bundle [GO:0097427]; perinuclear region of cytoplasm [GO:0048471]; tubulin binding [GO:0015631]; microtubule bundle formation [GO:0001578]; microtubule polymerization [GO:0046785]	GO:0001578; GO:0005874; GO:0015631; GO:0046785; GO:0048471; GO:0097427	Tppp3	Q9CRB6
-1.30127	14.3278	-14.1138	2.34e-09	4.04e-06	11.7764	1.01e-10	1.67e-07	Transformation/transcription domain-associated protein (Tra1 homolog)	TRRAP_MOUSE	SUBCELLULAR LOCATION: Nucleus {ECO:0000250}.	Golgi apparatus [GO:0005794]; histone acetyltransferase complex [GO:0000123]; NuA4 histone acetyltransferase complex [GO:0035267]; nucleoplasm [GO:0005654]; nucleus [GO:0005634]; STAGA complex [GO:0030914]; Swr1 complex [GO:0000812]; transcription factor complex [GO:0005667]; transcription factor TFTC complex [GO:0033276]; kinase activity [GO:0016301]; transcription coactivator activity [GO:00037…	GO:0000123; GO:0000812; GO:0003712; GO:0003713; GO:0005634; GO:0005654; GO:0005667; GO:0005794; GO:0006281; GO:0006351; GO:0006355; GO:0007093; GO:0016301; GO:0016578; GO:0030914; GO:0033276; GO:0035267; GO:0043967; GO:0043968	Trrap	Q80YV3
-0.736848	16.6404	-13.7215	3.32e-09	4.6e-06	11.4599	3.23e-10	4.26e-07	Argininosuccinate synthase (EC 6.3.4.5) (Citrulline--aspartate ligase)	ASSY_MOUSE	SUBCELLULAR LOCATION: Cytoplasm, cytosol {ECO:0000250|UniProtKB:P00966}.	cell body fiber [GO:0070852]; cytosol [GO:0005829]; endoplasmic reticulum [GO:0005783]; lysosome [GO:0005764]; mitochondrial outer membrane [GO:0005741]; mitochondrion [GO:0005739]; myelin sheath [GO:0043209]; nucleus [GO:0005634]; perikaryon [GO:0043204]; amino acid binding [GO:0016597]; argininosuccinate synthase activity [GO:0004055]; ATP binding [GO:0005524]; identical protein binding [GO:004…	GO:0000050; GO:0000052; GO:0000053; GO:0001822; GO:0001889; GO:0004055; GO:0005524; GO:0005634; GO:0005739; GO:0005741; GO:0005764; GO:0005783; GO:0005829; GO:0006526; GO:0006531; GO:0006953; GO:0007494; GO:0007568; GO:0007584; GO:0007623; GO:0010043; GO:0010046; GO:0015643; GO:0016597; GO:0032355; GO:0042802; GO:0043204; GO:0043209; GO:0045429; GO:0060416; GO:0060539; GO:0070852; GO:0071222; GO:…	Ass1	P16460
-0.951901	17.5159	-12.3673	1.2e-08	1.05e-05	10.2824	1.4e-08	1.32e-05	Stathmin-4 (Stathmin-like protein B3) (RB3)	STMN4_MOUSE	SUBCELLULAR LOCATION: Golgi apparatus {ECO:0000250}. Cell projection, growth cone {ECO:0000250}. Cell projection, axon {ECO:0000250}.	cytoplasm [GO:0005737]; Golgi apparatus [GO:0005794]; growth cone [GO:0030426]; neuron projection [GO:0043005]; tubulin binding [GO:0015631]; microtubule depolymerization [GO:0007019]; neuron projection development [GO:0031175]; regulation of cytoskeleton organization [GO:0051493]; regulation of microtubule polymerization or depolymerization [GO:0031110]	GO:0005737; GO:0005794; GO:0007019; GO:0015631; GO:0030426; GO:0031110; GO:0031175; GO:0043005; GO:0051493	Stmn4	P63042
-0.646782	14.9801	-12.3499	1.22e-08	1.05e-05	10.2664	1.47e-08	1.36e-05	Contactin-associated protein 1 (Caspr) (Caspr1) (MHDNIV) (NCP1) (Neurexin IV) (Neurexin-4) (Paranodin)	CNTP1_MOUSE	SUBCELLULAR LOCATION: Membrane {ECO:0000305}; Single-pass type I membrane protein {ECO:0000305}. Cell junction, paranodal septate junction {ECO:0000269|PubMed:25378149}.	integral component of membrane [GO:0016021]; myelin sheath [GO:0043209]; paranodal junction [GO:0033010]; paranode region of axon [GO:0033270]; plasma membrane [GO:0005886]; SH3 domain binding [GO:0017124]; cell adhesion [GO:0007155]; central nervous system myelination [GO:0022010]; cytoskeleton organization [GO:0007010]; myelination in peripheral nervous system [GO:0022011]; neuromuscular proces…	GO:0002175; GO:0005886; GO:0007010; GO:0007155; GO:0016021; GO:0017124; GO:0019227; GO:0022010; GO:0022011; GO:0030913; GO:0031175; GO:0033010; GO:0033270; GO:0043209; GO:0048812; GO:0050884; GO:0050885; GO:0071205	Cntnap1	O54991
0.848278	14.9896	12.4954	1.05e-08	1.05e-05	10.3998	2.09e-08	1.72e-05	Methyltransferase-like 26	MTL26_MOUSE				Mettl26	Q9DCS2
-0.585177	15.4459	-11.7117	2.32e-08	1.53e-05	9.66073	7.62e-08	4.97e-05	SH2 domain-containing protein 3C (Cas/HEF1-associated signal transducer) (SH2 domain-containing Eph receptor-binding protein 1)	SH2D3_MOUSE	SUBCELLULAR LOCATION: Cytoplasm {ECO:0000269|PubMed:10692442}. Membrane {ECO:0000269|PubMed:10692442}; Peripheral membrane protein {ECO:0000269|PubMed:10692442}. Note=Associated with the membrane when EGF-stimulated. Found at ruffling membranes.	cytoplasm [GO:0005737]; membrane [GO:0016020]; guanyl-nucleotide exchange factor activity [GO:0005085]; SH3/SH2 adaptor activity [GO:0005070]; transmembrane receptor protein tyrosine kinase adaptor activity [GO:0005068]; JNK cascade [GO:0007254]; signal transduction [GO:0007165]; small GTPase mediated signal transduction [GO:0007264]	GO:0005068; GO:0005070; GO:0005085; GO:0005737; GO:0007165; GO:0007254; GO:0007264; GO:0016020	Sh2d3c	Q9QZS8
-0.652606	14.5921	-11.6661	2.44e-08	1.53e-05	9.61612	8.55e-08	5.39e-05	Dyslexia-associated protein KIAA0319 homolog	K0319_MOUSE	SUBCELLULAR LOCATION: Cell membrane {ECO:0000250|UniProtKB:Q5VV43}; Single-pass type I membrane protein {ECO:0000250|UniProtKB:Q5VV43}. Early endosome membrane {ECO:0000250|UniProtKB:Q5VV43}; Single-pass type I membrane protein {ECO:0000250|UniProtKB:Q5VV43}.	early endosome [GO:0005769]; early endosome membrane [GO:0031901]; integral component of membrane [GO:0016021]; intracellular membrane-bounded organelle [GO:0043231]; plasma membrane [GO:0005886]; negative regulation of dendrite development [GO:2000171]; neuron migration [GO:0001764]	GO:0001764; GO:0005769; GO:0005886; GO:0016021; GO:0031901; GO:0043231; GO:2000171	Kiaa0319	Q5SZV5
-1.10359	15.3965	-11.5378	2.79e-08	1.53e-05	9.48959	1.18e-07	6.64e-05	Neurofilament heavy polypeptide (NF-H) (200 kDa neurofilament protein) (Neurofilament triplet H protein)	NFH_MOUSE	SUBCELLULAR LOCATION: Cytoplasm {ECO:0000250|UniProtKB:P12036}.	axon [GO:0030424]; cytoplasm [GO:0005737]; cytoskeleton [GO:0005856]; mitochondrion [GO:0005739]; myelin sheath [GO:0043209]; neurofibrillary tangle [GO:0097418]; neurofilament [GO:0005883]; postsynaptic density [GO:0014069]; protein kinase binding [GO:0019901]; structural molecule activity [GO:0005198]; axon development [GO:0061564]; cellular response to leukemia inhibitory factor [GO:1990830]; …	GO:0000226; GO:0005198; GO:0005737; GO:0005739; GO:0005856; GO:0005883; GO:0014069; GO:0019901; GO:0030424; GO:0033693; GO:0043209; GO:0045104; GO:0045110; GO:0048936; GO:0060052; GO:0061564; GO:0097418; GO:1902513; GO:1990830	Nefh	P19246
-0.669924	15.0377	-11.4816	2.96e-08	1.53e-05	9.43375	1.35e-07	7.22e-05	RUN and SH3 domain-containing protein 1	RUSC1_MOUSE	SUBCELLULAR LOCATION: Cytoplasm {ECO:0000269|PubMed:22404429}. Nucleus {ECO:0000250}. Cytoplasm, cytoskeleton {ECO:0000269|PubMed:22404429}. Cytoplasmic vesicle {ECO:0000305|PubMed:22404429}. Early endosome {ECO:0000305|PubMed:22404429}. Cell junction, synapse, postsynaptic cell membrane, postsynaptic density {ECO:0000269|PubMed:22404429}. Golgi apparatus {ECO:0000305|PubMed:22404429}. Note=Trans…	cell junction [GO:0030054]; cytoplasmic vesicle [GO:0031410]; cytosol [GO:0005829]; early endosome [GO:0005769]; Golgi apparatus [GO:0005794]; microtubule [GO:0005874]; microtubule cytoskeleton [GO:0015630]; nucleus [GO:0005634]; postsynaptic density [GO:0014069]; postsynaptic membrane [GO:0045211]; actin binding [GO:0003779]; protein polyubiquitination [GO:0000209]	GO:0000209; GO:0003779; GO:0005634; GO:0005769; GO:0005794; GO:0005829; GO:0005874; GO:0014069; GO:0015630; GO:0030054; GO:0031410; GO:0045211	Rusc1	Q8BG26
-1.25057	14.7798	-11.4355	3.1e-08	1.53e-05	9.38777	1.52e-07	7.7e-05	Peripherin	PERI_MOUSE		axon [GO:0030424]; C-fiber [GO:0044299]; intermediate filament [GO:0005882]; neurofilament [GO:0005883]; neuronal cell body [GO:0043025]; photoreceptor outer segment [GO:0001750]; photoreceptor outer segment membrane [GO:0042622]; type III intermediate filament [GO:0045098]; structural molecule activity [GO:0005198]; intermediate filament cytoskeleton organization [GO:0045104]	GO:0001750; GO:0005198; GO:0005882; GO:0005883; GO:0030424; GO:0042622; GO:0043025; GO:0044299; GO:0045098; GO:0045104	Prph	P15331
0.977338	15.6904	11.4692	3e-08	1.53e-05	9.42143	2.76e-07	0.000130123	Phosphoglycerate mutase 2 (EC 5.4.2.11) (EC 5.4.2.4) (BPG-dependent PGAM 2) (Muscle-specific phosphoglycerate mutase) (Phosphoglycerate mutase isozyme M) (PGAM-M)	PGAM2_MOUSE		cytosol [GO:0005829]; nucleus [GO:0005634]; 2,3-bisphosphoglycerate-dependent phosphoglycerate mutase activity [GO:0046538]; bisphosphoglycerate mutase activity [GO:0004082]; cofactor binding [GO:0048037]; hydrolase activity [GO:0016787]; phosphoglycerate mutase activity [GO:0004619]; gluconeogenesis [GO:0006094]; glycolytic process [GO:0006096]; Notch signaling pathway [GO:0007219]; regulation o…	GO:0004082; GO:0004619; GO:0005634; GO:0005829; GO:0006094; GO:0006096; GO:0006941; GO:0007219; GO:0007283; GO:0016787; GO:0043456; GO:0046538; GO:0046689; GO:0048037	Pgam2	O70250
0.587282	15.6119	11.1355	4.28e-08	1.97e-05	9.08353	6.11e-07	0.000255119	Protein-L-isoaspartate O-methyltransferase domain-containing protein 2	PCMD2_MOUSE	SUBCELLULAR LOCATION: Cytoplasm {ECO:0000250}.	cytoplasm [GO:0005737]; protein-L-isoaspartate (D-aspartate) O-methyltransferase activity [GO:0004719]	GO:0004719; GO:0005737	Pcmtd2	Q8BHD8
-0.73036	15.3433	-10.8313	5.97e-08	2.58e-05	8.76649	6.48e-07	0.000267061	Neurofilament light polypeptide (NF-L) (68 kDa neurofilament protein) (Neurofilament triplet L protein)	NFL_MOUSE		axon [GO:0030424]; axon cytoplasm [GO:1904115]; cytoplasm [GO:0005737]; growth cone [GO:0030426]; intermediate filament [GO:0005882]; myelin sheath [GO:0043209]; neurofilament [GO:0005883]; neuron projection [GO:0043005]; TSC1-TSC2 complex [GO:0033596]; identical protein binding [GO:0042802]; protein binding, bridging [GO:0030674]; protein C-terminus binding [GO:0008022]; protein heterodimerizati…	GO:0000226; GO:0005200; GO:0005737; GO:0005882; GO:0005883; GO:0008022; GO:0008089; GO:0008090; GO:0014012; GO:0019896; GO:0021510; GO:0021766; GO:0021987; GO:0030424; GO:0030426; GO:0030674; GO:0031133; GO:0033596; GO:0033693; GO:0040011; GO:0042802; GO:0043005; GO:0043209; GO:0043434; GO:0043524; GO:0045105; GO:0045109; GO:0045110; GO:0046982; GO:0048812; GO:0050772; GO:0050885; GO:0051258; GO:…	Nefl	P08551
0.919503	14.8647	10.7241	6.72e-08	2.74e-05	8.65266	1.58e-06	0.000594002	Nucleotide triphosphate diphosphatase NUDT15 (EC 3.6.1.9) (MutT homolog 2) (mMTH2) (Nucleoside diphosphate-linked moiety X motif 15) (Nudix motif 15) (Nucleoside diphosphate-linked to another moiety X hydrolase 15) (Nudix hydrolase 15)	NUD15_MOUSE		cytosol [GO:0005829]; 8-oxo-7,8-dihydrodeoxyguanosine triphosphate pyrophosphatase activity [GO:0035539]; 8-oxo-7,8-dihydroguanosine triphosphate pyrophosphatase activity [GO:0008413]; metal ion binding [GO:0046872]; NADH pyrophosphatase activity [GO:0035529]; nucleoside-diphosphatase activity [GO:0017110]; nucleoside-triphosphate diphosphatase activity [GO:0047429]; dGTP catabolic process [GO:00…	GO:0000278; GO:0000302; GO:0005829; GO:0006195; GO:0006203; GO:0008413; GO:0009217; GO:0017110; GO:0035529; GO:0035539; GO:0042738; GO:0046872; GO:0047429; GO:0061136; GO:1901292	Nudt15	Q8BG93
-0.540276	15.0483	-10.2741	1.12e-07	4.01e-05	8.16257	2.32e-06	0.00081513	Importin subunit alpha-1 (Importin alpha P1) (Karyopherin subunit alpha-2) (Pendulin) (Pore targeting complex 58 kDa subunit) (PTAC58) (RAG cohort protein 1) (SRP1-alpha)	IMA1_MOUSE	SUBCELLULAR LOCATION: Cytoplasm {ECO:0000250}. Nucleus {ECO:0000250}.	cytosol [GO:0005829]; nuclear pore [GO:0005643]; nucleoplasm [GO:0005654]; histone deacetylase binding [GO:0042826]; nuclear import signal receptor activity [GO:0061608]; nuclear localization sequence binding [GO:0008139]; protein transporter activity [GO:0008565]; repressing transcription factor binding [GO:0070491]; NLS-bearing protein import into nucleus [GO:0006607]; protein import into nucle…	GO:0005643; GO:0005654; GO:0005829; GO:0006606; GO:0006607; GO:0008139; GO:0008565; GO:0042826; GO:0061608; GO:0070491	Kpna2	P52293
-0.515982	16.8008	-10.2448	1.16e-07	4.01e-05	8.12989	2.47e-06	0.000858438	Serotransferrin (Transferrin) (Beta-1 metal-binding globulin) (Siderophilin)	TRFE_MOUSE	SUBCELLULAR LOCATION: Secreted.	apical plasma membrane [GO:0016324]; basal part of cell [GO:0045178]; basal plasma membrane [GO:0009925]; cell surface [GO:0009986]; clathrin-coated pit [GO:0005905]; cytoplasmic vesicle [GO:0031410]; dense body [GO:0097433]; early endosome [GO:0005769]; endocytic vesicle [GO:0030139]; endosome [GO:0005768]; extracellular region [GO:0005576]; extracellular space [GO:0005615]; extrinsic component …	GO:0005576; GO:0005615; GO:0005768; GO:0005769; GO:0005770; GO:0005905; GO:0006826; GO:0006879; GO:0007015; GO:0007257; GO:0008198; GO:0008199; GO:0009925; GO:0009986; GO:0015091; GO:0016020; GO:0016324; GO:0030120; GO:0030139; GO:0030316; GO:0031232; GO:0031410; GO:0031982; GO:0034986; GO:0042327; GO:0045178; GO:0045780; GO:0045893; GO:0048260; GO:0048471; GO:0055037; GO:0060395; GO:0070371; GO:…	Tf	Q921I1
-0.53897	14.8722	-10.1075	1.36e-07	4.42e-05	7.97587	3.35e-06	0.00108395	Complement C3 (HSE-MSF) [Cleaved into: Complement C3 beta chain; C3-beta-c (C3bc); Complement C3 alpha chain; C3a anaphylatoxin; Acylation stimulating protein (ASP) (C3adesArg); Complement C3b alpha' chain; Complement C3c alpha' chain fragment 1; Complement C3dg fragment; Complement C3g fragment; Complement C3d fragment; Complement C3f fragment; Complement C3c alpha' chain fragment 2]	CO3_MOUSE	SUBCELLULAR LOCATION: Secreted.	extracellular space [GO:0005615]; protein-containing complex [GO:0032991]; C5L2 anaphylatoxin chemotactic receptor binding [GO:0031715]; endopeptidase inhibitor activity [GO:0004866]; amyloid-beta clearance [GO:0097242]; complement activation [GO:0006956]; complement activation, alternative pathway [GO:0006957]; complement activation, classical pathway [GO:0006958]; fatty acid metabolic process […	GO:0001798; GO:0001934; GO:0001970; GO:0004866; GO:0005615; GO:0006631; GO:0006911; GO:0006954; GO:0006956; GO:0006957; GO:0006958; GO:0010575; GO:0010828; GO:0010866; GO:0010884; GO:0031715; GO:0032991; GO:0045745; GO:0045766; GO:0050766; GO:0097242; GO:2000427	C3	P01027
1.01642	15.7835	10.3369	1.04e-07	4e-05	8.23213	3.74e-06	0.00117444	Protein-arginine deiminase type-2 (EC 3.5.3.15) (Peptidylarginine deiminase II) (Protein-arginine deiminase type II)	PADI2_MOUSE	SUBCELLULAR LOCATION: Cytoplasm {ECO:0000250}.	cytoplasm [GO:0005737]; nucleus [GO:0005634]; transcriptionally active chromatin [GO:0035327]; calcium ion binding [GO:0005509]; estrogen receptor binding [GO:0030331]; protein-arginine deiminase activity [GO:0004668]; cellular response to leukemia inhibitory factor [GO:1990830]; chromatin-mediated maintenance of transcription [GO:0048096]; histone citrullination [GO:0036414]; histone H3-R26 citr…	GO:0004668; GO:0005509; GO:0005634; GO:0005737; GO:0010848; GO:0018101; GO:0030331; GO:0030520; GO:0035327; GO:0036413; GO:0036414; GO:0048096; GO:0070100; GO:1901624; GO:1990830	Padi2	Q08642
-1.0023	16.0846	-9.86031	1.82e-07	5.1e-05	7.69348	5.73e-06	0.00157763	Stathmin-2 (Superior cervical ganglion-10 protein) (Protein SCG10)	STMN2_MOUSE	SUBCELLULAR LOCATION: Cytoplasm {ECO:0000269|PubMed:16618812}. Cytoplasm, perinuclear region {ECO:0000269|PubMed:16618812}. Cell projection, growth cone {ECO:0000269|PubMed:16618812}. Cell projection, axon {ECO:0000269|PubMed:16618812}. Membrane {ECO:0000305}; Peripheral membrane protein {ECO:0000305}; Cytoplasmic side {ECO:0000305}. Endosome {ECO:0000250}. Golgi apparatus {ECO:0000250}. Cell pro…	cytoplasm [GO:0005737]; endosome [GO:0005768]; Golgi apparatus [GO:0005794]; growth cone [GO:0030426]; lamellipodium [GO:0030027]; membrane [GO:0016020]; neuron projection [GO:0043005]; neuronal cell body [GO:0043025]; perinuclear region of cytoplasm [GO:0048471]; calcium-dependent protein binding [GO:0048306]; tubulin binding [GO:0015631]; cellular response to nerve growth factor stimulus [GO:19…	GO:0005737; GO:0005768; GO:0005794; GO:0007019; GO:0007026; GO:0010976; GO:0010977; GO:0015631; GO:0016020; GO:0030027; GO:0030426; GO:0031115; GO:0031117; GO:0031175; GO:0043005; GO:0043025; GO:0048306; GO:0048471; GO:0051493; GO:1990090	Stmn2	P55821
-0.771656	16.6574	-9.78907	1.98e-07	5.1e-05	7.61088	6.68e-06	0.00173574	Neurofilament medium polypeptide (NF-M) (160 kDa neurofilament protein) (Neurofilament 3) (Neurofilament triplet M protein)	NFM_MOUSE		axon [GO:0030424]; myelin sheath [GO:0043209]; neurofilament [GO:0005883]; neuromuscular junction [GO:0031594]; neuron projection [GO:0043005]; postsynaptic density [GO:0014069]; structural molecule activity [GO:0005198]; axo-dendritic transport [GO:0008088]; axon development [GO:0061564]; intermediate filament bundle assembly [GO:0045110]; intermediate filament cytoskeleton organization [GO:0045…	GO:0000226; GO:0005198; GO:0005883; GO:0008088; GO:0014069; GO:0030424; GO:0031133; GO:0031594; GO:0043005; GO:0043209; GO:0045104; GO:0045110; GO:0060052; GO:0061564	Nefm	P08553
-0.497159	15.9278	-9.785	1.99e-07	5.1e-05	7.60614	6.74e-06	0.00174491	Hydroxymethylglutaryl-CoA synthase, cytoplasmic (HMG-CoA synthase) (EC 2.3.3.10) (3-hydroxy-3-methylglutaryl coenzyme A synthase)	HMCS1_MOUSE	SUBCELLULAR LOCATION: Cytoplasm {ECO:0000250}.	cytosol [GO:0005829]; drug binding [GO:0008144]; hydroxymethylglutaryl-CoA synthase activity [GO:0004421]; isomerase activity [GO:0016853]; organic acid binding [GO:0043177]; protein homodimerization activity [GO:0042803]; brain development [GO:0007420]; cellular response to cholesterol [GO:0071397]; cellular response to follicle-stimulating hormone stimulus [GO:0071372]; cellular response to low…	GO:0001889; GO:0004421; GO:0005829; GO:0006695; GO:0007420; GO:0008144; GO:0008299; GO:0008584; GO:0009645; GO:0014074; GO:0016853; GO:0033197; GO:0042493; GO:0042803; GO:0043177; GO:0046690; GO:0071372; GO:0071397; GO:0071404	Hmgcs1	Q8JZK9
0.73521	14.6095	10.0504	1.45e-07	4.42e-05	7.91115	6.94e-06	0.00177673	Protein FAM173A	F173A_MOUSE	SUBCELLULAR LOCATION: Membrane {ECO:0000305}; Single-pass membrane protein {ECO:0000305}.	integral component of membrane [GO:0016021]	GO:0016021	Fam173a	Q501J2
0.60563	16.1004	10.0403	1.47e-07	4.42e-05	7.89975	7.09e-06	0.00179952	Serine racemase (EC 5.1.1.18) (D-serine ammonia-lyase) (D-serine dehydratase) (EC 4.3.1.18) (L-serine ammonia-lyase) (L-serine dehydratase) (EC 4.3.1.17)	SRR_MOUSE		apical part of cell [GO:0045177]; cytoplasm [GO:0005737]; neuronal cell body [GO:0043025]; plasma membrane [GO:0005886]; ATP binding [GO:0005524]; calcium ion binding [GO:0005509]; D-serine ammonia-lyase activity [GO:0008721]; glycine binding [GO:0016594]; L-serine ammonia-lyase activity [GO:0003941]; magnesium ion binding [GO:0000287]; PDZ domain binding [GO:0030165]; protein homodimerization ac…	GO:0000287; GO:0003941; GO:0005509; GO:0005524; GO:0005737; GO:0005886; GO:0006563; GO:0007420; GO:0007568; GO:0008721; GO:0009069; GO:0016594; GO:0018114; GO:0030165; GO:0030170; GO:0030378; GO:0032496; GO:0042803; GO:0042866; GO:0043025; GO:0043278; GO:0045177; GO:0051289; GO:0070178; GO:0070179	Srr	Q9QZX7
-0.636858	14.1664	-9.62353	2.42e-07	5.98e-05	7.41683	9.49e-06	0.00230046	N-terminal EF-hand calcium-binding protein 1 (EF-hand calcium-binding protein 1)	NECA1_MOUSE	SUBCELLULAR LOCATION: Cytoplasm {ECO:0000269|PubMed:12044471}.	cytosol [GO:0005829]; nucleoplasm [GO:0005654]; nucleus [GO:0005634]; calcium ion binding [GO:0005509]	GO:0005509; GO:0005634; GO:0005654; GO:0005829	Necab1	Q8BG18
0.491286	16.0412	9.79499	1.97e-07	5.1e-05	7.61776	1.19e-05	0.00276118	Sorting nexin-32 (Sorting nexin-6B)	SNX32_MOUSE		endosome [GO:0005768]; extrinsic component of membrane [GO:0019898]; phosphatidylinositol binding [GO:0035091]; endocytosis [GO:0006897]; protein transport [GO:0015031]; vesicle organization [GO:0016050]	GO:0005768; GO:0006897; GO:0015031; GO:0016050; GO:0019898; GO:0035091	Snx32	Q80ZJ7
-0.641493	14.6616	-9.46974	2.92e-07	6.96e-05	7.23382	1.31e-05	0.0029745	Squalene monooxygenase (EC 1.14.14.17) (Squalene epoxidase) (SE)	ERG1_MOUSE	SUBCELLULAR LOCATION: Microsome membrane; Multi-pass membrane protein. Endoplasmic reticulum membrane; Multi-pass membrane protein.	endoplasmic reticulum [GO:0005783]; endoplasmic reticulum membrane [GO:0005789]; integral component of membrane [GO:0016021]; organelle membrane [GO:0031090]; flavin adenine dinucleotide binding [GO:0050660]; squalene monooxygenase activity [GO:0004506]; cellular aromatic compound metabolic process [GO:0006725]; cholesterol metabolic process [GO:0008203]; response to organic substance [GO:0010033…	GO:0004506; GO:0005783; GO:0005789; GO:0006725; GO:0008203; GO:0010033; GO:0016021; GO:0016126; GO:0031090; GO:0050660	Sqle	P52019
-0.691317	14.1156	-9.27244	3.73e-07	8.59e-05	6.99513	1.96e-05	0.00429001	Transmembrane protein 47 (Transmembrane 4 superfamily member 10)	TMM47_MOUSE	SUBCELLULAR LOCATION: Membrane {ECO:0000305}; Multi-pass membrane protein {ECO:0000305}. Cell junction {ECO:0000269|PubMed:17195181, ECO:0000269|PubMed:26990309}. Cell junction, adherens junction {ECO:0000250|UniProtKB:Q9XSV3}. Note=In undifferentiated cultured podocytes localizes to the perinuclear region and translocates to the cell membrane after Cadherin appearance at cell-cell contacts. Upon…	adherens junction [GO:0005912]; cell-cell junction [GO:0005911]; integral component of membrane [GO:0016021]; plasma membrane [GO:0005886]	GO:0005886; GO:0005911; GO:0005912; GO:0016021	Tmem47	Q9JJG6
-0.582475	14.6021	-9.15593	4.31e-07	9.63e-05	6.85208	2.48e-05	0.00526966	Guanine nucleotide-binding protein G(I)/G(S)/G(O) subunit gamma-4	GBG4_MOUSE	SUBCELLULAR LOCATION: Cell membrane {ECO:0000305}; Lipid-anchor {ECO:0000305}; Cytoplasmic side {ECO:0000305}.	heterotrimeric G-protein complex [GO:0005834]; GTPase activity [GO:0003924]; signal transducer activity [GO:0004871]; G-protein coupled receptor signaling pathway [GO:0007186]; negative regulation of cell growth [GO:0030308]	GO:0003924; GO:0004871; GO:0005834; GO:0007186; GO:0030308	Gng4	P50153
-0.480093	16.217	-9.0109	5.18e-07	0.00010954	6.67179	3.31e-05	0.00672211	Synembryn-A (Protein Ric-8A)	RIC8A_MOUSE	SUBCELLULAR LOCATION: Cytoplasm {ECO:0000250}. Cell membrane {ECO:0000250}. Note=Colocalizes with GNAI1 and RGS14 at the plasma membrane (By similarity). Colocalizes with RIC8A in CA2 hippocampal neurons. {ECO:0000250, ECO:0000269|PubMed:21158412}.	cytoplasm [GO:0005737]; cytosol [GO:0005829]; membrane [GO:0016020]; plasma membrane [GO:0005886]; G-protein alpha-subunit binding [GO:0001965]; GTPase activator activity [GO:0005096]; guanyl-nucleotide exchange factor activity [GO:0005085]; adenylate cyclase-inhibiting G-protein coupled receptor signaling pathway [GO:0007193]; basement membrane organization [GO:0071711]; cell migration involved …	GO:0001701; GO:0001944; GO:0001965; GO:0005085; GO:0005096; GO:0005737; GO:0005829; GO:0005886; GO:0007193; GO:0007369; GO:0008277; GO:0008542; GO:0009416; GO:0016020; GO:0042074; GO:0070586; GO:0071711	Ric8a	Q3TIR3
-0.624148	15.767	-8.91448	5.87e-07	0.000115944	6.55056	4.01e-05	0.00783617	RAS guanyl-releasing protein 2 (Calcium and DAG-regulated guanine nucleotide exchange factor I) (CalDAG-GEFI) (F25B3.3 kinase-like protein)	GRP2_MOUSE	SUBCELLULAR LOCATION: Cytoplasm, cytosol {ECO:0000250}. Cell membrane {ECO:0000250}; Peripheral membrane protein {ECO:0000250}. Cell junction, synapse, synaptosome {ECO:0000250}. Cell projection, ruffle membrane {ECO:0000305}; Peripheral membrane protein {ECO:0000305}. Note=Found both in the cytosol and associated with membranes. Enriched at juxtamembrane areas and membrane ruffles. Localizes to …	cell junction [GO:0030054]; cytosol [GO:0005829]; neuron projection [GO:0043005]; plasma membrane [GO:0005886]; ruffle membrane [GO:0032587]; synapse [GO:0045202]; calcium ion binding [GO:0005509]; guanyl-nucleotide exchange factor activity [GO:0005085]; cellular response to calcium ion [GO:0071277]; positive regulation of GTPase activity [GO:0043547]; small GTPase mediated signal transduction [G…	GO:0005085; GO:0005509; GO:0005829; GO:0005886; GO:0007264; GO:0030054; GO:0032587; GO:0043005; GO:0043547; GO:0045202; GO:0071277	Rasgrp2	Q9QUG9
-0.554388	13.8757	-8.82278	6.6e-07	0.00012689	6.43422	4.8e-05	0.00900495	Olfactomedin-like protein 3	OLFL3_MOUSE	SUBCELLULAR LOCATION: Secreted {ECO:0000250}.	extracellular space [GO:0005615]; multicellular organism development [GO:0007275]	GO:0005615; GO:0007275	Olfml3	Q8BK62
-0.411369	16.5008	-8.77597	7.02e-07	0.000131198	6.37443	5.25e-05	0.00964127	SLIT-ROBO Rho GTPase-activating protein 2 (srGAP2) (Formin-binding protein 2) (Formin-binding protein 27) (FBP-27)	SRGP2_MOUSE	SUBCELLULAR LOCATION: Cell membrane {ECO:0000250}. Cell projection, dendritic spine {ECO:0000250}. Cell junction, synapse, postsynaptic cell membrane, postsynaptic density. Cell junction, synapse, postsynaptic cell membrane. Cell projection, lamellipodium {ECO:0000250}. Cytoplasmic vesicle, phagosome. Nucleus {ECO:0000250}. Cytoplasm {ECO:0000250}. Note=Recruited to actin-rich phagosomes during p…	cell junction [GO:0030054]; cytosol [GO:0005829]; dendritic spine head [GO:0044327]; lamellipodium [GO:0030027]; mitochondrial inner membrane [GO:0005743]; nucleoplasm [GO:0005654]; phagocytic vesicle [GO:0045335]; plasma membrane [GO:0005886]; postsynaptic density [GO:0014069]; postsynaptic membrane [GO:0045211]; GTPase activator activity [GO:0005096]; identical protein binding [GO:0042802]; pro…	GO:0003363; GO:0005096; GO:0005654; GO:0005743; GO:0005829; GO:0005886; GO:0007165; GO:0014069; GO:0021816; GO:0030027; GO:0030054; GO:0030336; GO:0034446; GO:0042802; GO:0042803; GO:0043547; GO:0044327; GO:0045211; GO:0045335; GO:0046847; GO:0048365; GO:0048812; GO:0051014; GO:0060996; GO:2001223	Srgap2	Q91Z67
0.627165	16.7615	9.00475	5.22e-07	0.00010954	6.66409	5.79e-05	0.0103585	Putative peptidyl-tRNA hydrolase PTRHD1 (EC 3.1.1.29) (Peptidyl-tRNA hydrolase domain-containing protein 1)	PTRD1_MOUSE		aminoacyl-tRNA hydrolase activity [GO:0004045]	GO:0004045	Ptrhd1	D3Z4S3
0.456807	15.6174	8.96365	5.51e-07	0.000112054	6.61252	6.27e-05	0.0109611	PHD finger protein 20-like protein 1	P20L1_MOUSE		nucleus [GO:0005634]; metal ion binding [GO:0046872]; regulation of transcription, DNA-templated [GO:0006355]	GO:0005634; GO:0006355; GO:0046872	Phf20l1	Q8CCJ9
-0.460855	16.3827	-8.64385	8.34e-07	0.000147952	6.20427	6.77e-05	0.01157	Atlastin-1 (EC 3.6.5.-) (Spastic paraplegia 3A homolog)	ATLA1_MOUSE	SUBCELLULAR LOCATION: Endoplasmic reticulum membrane {ECO:0000250|UniProtKB:Q8WXF7}; Multi-pass membrane protein {ECO:0000250|UniProtKB:Q8WXF7}. Golgi apparatus membrane {ECO:0000250|UniProtKB:Q8WXF7}; Multi-pass membrane protein {ECO:0000250|UniProtKB:Q8WXF7}. Cell projection, axon {ECO:0000250|UniProtKB:Q6PST4}. Note=Localizes to endoplasmic reticulum tubular network. {ECO:0000269|PubMed:246688…	axon [GO:0030424]; cytoplasm [GO:0005737]; endoplasmic reticulum [GO:0005783]; endoplasmic reticulum membrane [GO:0005789]; endoplasmic reticulum tubular network [GO:0071782]; endoplasmic reticulum tubular network membrane [GO:0098826]; Golgi apparatus [GO:0005794]; Golgi cis cisterna [GO:0000137]; Golgi membrane [GO:0000139]; integral component of membrane [GO:0016021]; GTP binding [GO:0005525];…	GO:0000137; GO:0000139; GO:0003924; GO:0005525; GO:0005737; GO:0005783; GO:0005789; GO:0005794; GO:0007029; GO:0007409; GO:0016021; GO:0030424; GO:0042802; GO:0051260; GO:0071782; GO:0098826; GO:1990809	Atl1	Q8BH66
0.518114	16.0558	8.70996	7.65e-07	0.000139233	6.28968	0.000101308	0.0150146	Serine/threonine-protein phosphatase CPPED1 (EC 3.1.3.16) (Calcineurin-like phosphoesterase domain-containing protein 1)	CPPED_MOUSE	SUBCELLULAR LOCATION: Cytoplasm {ECO:0000250}.	cytosol [GO:0005829]; plasma membrane [GO:0005886]; metal ion binding [GO:0046872]; phosphoprotein phosphatase activity [GO:0004721]	GO:0004721; GO:0005829; GO:0005886; GO:0046872	Cpped1	Q8BFS6
-0.663264	16.4677	-8.42658	1.11e-06	0.000178692	5.91973	0.000102055	0.0150808	Stathmin-3 (Hippocampus abundant transcript 3) (SCG10-like protein) (SCG10-related protein HiAT3)	STMN3_MOUSE	SUBCELLULAR LOCATION: Golgi apparatus. Cell projection, growth cone. Cell projection, axon.	cytoplasm [GO:0005737]; Golgi apparatus [GO:0005794]; growth cone [GO:0030426]; neuron projection [GO:0043005]; protein domain specific binding [GO:0019904]; tubulin binding [GO:0015631]; cytoplasmic microtubule organization [GO:0031122]; microtubule depolymerization [GO:0007019]; negative regulation of Rac protein signal transduction [GO:0035021]; neuron projection development [GO:0031175]; regu…	GO:0005737; GO:0005794; GO:0007019; GO:0015631; GO:0019904; GO:0030426; GO:0031110; GO:0031122; GO:0031175; GO:0035021; GO:0043005; GO:0043087; GO:0051493	Stmn3	O70166
-0.604965	15.9124	-8.41907	1.12e-06	0.000178692	5.90978	0.000103497	0.0152075	Nuclear receptor-interacting protein 3	NRIP3_MOUSE		aspartic-type endopeptidase activity [GO:0004190]	GO:0004190	Nrip3	Q9JJR9
-0.746919	14.8616	-8.40295	1.15e-06	0.000178692	5.88842	0.000106654	0.01548	Coiled-coil domain-containing protein 184	CC184_MOUSE		cytoplasm [GO:0005737]	GO:0005737	Ccdc184	Q8BMK5
-0.761439	14.9431	-8.39174	1.17e-06	0.000178692	5.87354	0.000108904	0.0156703	Neuronal vesicle trafficking-associated protein 1 (M234) (Neuron-enriched endosomal protein of 21 kDa) (Neuron-specific protein family member 1) (p21)	NSG1_MOUSE	SUBCELLULAR LOCATION: Membrane {ECO:0000250|UniProtKB:P02683}; Single-pass type II membrane protein {ECO:0000250|UniProtKB:P02683}. Golgi apparatus, trans-Golgi network membrane {ECO:0000250|UniProtKB:P02683}. Endosome membrane {ECO:0000250|UniProtKB:P02683}. Cell projection, dendrite {ECO:0000250|UniProtKB:P02683}. Early endosome membrane {ECO:0000250|UniProtKB:P02683}. Late endosome membrane {E…	cytoplasmic vesicle membrane [GO:0030659]; dendrite [GO:0030425]; early endosome membrane [GO:0031901]; endoplasmic reticulum [GO:0005783]; endoplasmic reticulum membrane [GO:0005789]; endosome [GO:0005768]; Golgi cisterna membrane [GO:0032580]; integral component of membrane [GO:0016021]; late endosome [GO:0005770]; lateral plasma membrane [GO:0016328]; lysosomal lumen [GO:0043202]; multivesicul…	GO:0001881; GO:0001921; GO:0005768; GO:0005770; GO:0005783; GO:0005789; GO:0006915; GO:0007212; GO:0016021; GO:0016328; GO:0030425; GO:0030659; GO:0031901; GO:0032051; GO:0032580; GO:0032585; GO:0032588; GO:0036477; GO:0042982; GO:0043202; GO:0045211; GO:0048268; GO:0055038; GO:0098814; GO:0098845; GO:0098887; GO:0099627; GO:0099630; GO:1900271	Nsg1	Q62092
-0.695543	15.22	-8.3778	1.19e-06	0.000178692	5.85503	0.000111762	0.0159072	Cathepsin L1 (EC 3.4.22.15) (Cathepsin L) (Major excreted protein) (MEP) (p39 cysteine proteinase) [Cleaved into: Cathepsin L1 heavy chain; Cathepsin L1 light chain]	CATL1_MOUSE	SUBCELLULAR LOCATION: Lysosome.	apical part of cell [GO:0045177]; cytoplasm [GO:0005737]; cytoplasmic vesicle [GO:0031410]; external side of plasma membrane [GO:0009897]; extracellular space [GO:0005615]; lysosome [GO:0005764]; microvillus [GO:0005902]; neuron projection [GO:0043005]; nucleolus [GO:0005730]; nucleus [GO:0005634]; perikaryon [GO:0043204]; secretory granule [GO:0030141]; vacuole [GO:0005773]; aminopeptidase activ…	GO:0004177; GO:0004197; GO:0005615; GO:0005634; GO:0005730; GO:0005737; GO:0005764; GO:0005773; GO:0005902; GO:0006508; GO:0007154; GO:0007283; GO:0008584; GO:0009267; GO:0009749; GO:0009897; GO:0010259; GO:0010839; GO:0014070; GO:0016485; GO:0016540; GO:0016807; GO:0021675; GO:0030141; GO:0031069; GO:0031410; GO:0034698; GO:0042277; GO:0042393; GO:0043005; GO:0043204; GO:0045177; GO:0046697; GO:…	Ctsl	P06797
-0.463845	17.0067	-8.34666	1.24e-06	0.000182383	5.81356	0.000118409	0.0164388	Kinesin light chain 1 (KLC 1)	KLC1_MOUSE	SUBCELLULAR LOCATION: Cell projection, growth cone {ECO:0000250}. Cytoplasmic vesicle {ECO:0000250}. Cytoplasm, cytoskeleton {ECO:0000305}.	axon [GO:0030424]; ciliary rootlet [GO:0035253]; cytoplasm [GO:0005737]; cytoplasmic vesicle [GO:0031410]; cytosol [GO:0005829]; growth cone [GO:0030426]; kinesin complex [GO:0005871]; membrane-bounded organelle [GO:0043227]; microtubule [GO:0005874]; neuron projection [GO:0043005]; microtubule motor activity [GO:0003777]; axo-dendritic transport [GO:0008088]; microtubule-based movement [GO:00070…	GO:0003777; GO:0005737; GO:0005829; GO:0005871; GO:0005874; GO:0007018; GO:0008088; GO:0030424; GO:0030426; GO:0031410; GO:0035253; GO:0035617; GO:0043005; GO:0043227	Klc1	O88447
-0.68931	17.4466	-8.32713	1.27e-06	0.000183352	5.7875	0.000122763	0.0167731	2',3'-cyclic-nucleotide 3'-phosphodiesterase (CNP) (CNPase) (EC 3.1.4.37)	CN37_MOUSE	SUBCELLULAR LOCATION: Membrane {ECO:0000269|PubMed:18076147}; Lipid-anchor {ECO:0000269|PubMed:18076147}. Melanosome {ECO:0000250}. Note=Firmly bound to membrane structures of brain white matter.	cytoplasm [GO:0005737]; cytosol [GO:0005829]; extracellular space [GO:0005615]; melanosome [GO:0042470]; membrane [GO:0016020]; microtubule [GO:0005874]; microvillus [GO:0005902]; mitochondrial inner membrane [GO:0005743]; mitochondrial outer membrane [GO:0005741]; myelin sheath [GO:0043209]; myelin sheath abaxonal region [GO:0035748]; myelin sheath adaxonal region [GO:0035749]; nucleoplasm [GO:0…	GO:0000226; GO:0003723; GO:0004113; GO:0005615; GO:0005634; GO:0005654; GO:0005737; GO:0005741; GO:0005743; GO:0005829; GO:0005874; GO:0005886; GO:0005902; GO:0007409; GO:0007568; GO:0008344; GO:0009214; GO:0009636; GO:0016020; GO:0030551; GO:0030900; GO:0031143; GO:0032496; GO:0035748; GO:0035749; GO:0042470; GO:0043209; GO:0046902; GO:0048471; GO:0048709	Cnp	P16330
-0.617119	14.6382	-8.24962	1.41e-06	0.000190823	5.68356	0.000141587	0.0181042	Protein cordon-bleu	COBL_MOUSE	SUBCELLULAR LOCATION: Cell membrane {ECO:0000250}; Peripheral membrane protein {ECO:0000250}; Cytoplasmic side {ECO:0000250}. Cytoplasm, cytoskeleton. Cell projection, ruffle. Cytoplasm. Note=Recruited to the cell membrane via interaction with PACSIN1 (By similarity). Colocalizes with the actin cytoskeleton. Detected throughout the neuron cell body, as well as in axons and dendrites. {ECO:0000250…	axon [GO:0030424]; axonal growth cone [GO:0044295]; cell cortex [GO:0005938]; cytoskeleton [GO:0005856]; dendrite [GO:0030425]; dendritic growth cone [GO:0044294]; neuronal cell body [GO:0043025]; perinuclear region of cytoplasm [GO:0048471]; plasma membrane [GO:0005886]; ruffle [GO:0001726]; actin monomer binding [GO:0003785]; actin crosslink formation [GO:0051764]; actin filament network format…	GO:0000578; GO:0001726; GO:0001757; GO:0001843; GO:0001889; GO:0003785; GO:0005856; GO:0005886; GO:0005938; GO:0030041; GO:0030424; GO:0030425; GO:0030903; GO:0033504; GO:0043025; GO:0044294; GO:0044295; GO:0048471; GO:0048565; GO:0048669; GO:0051639; GO:0051764; GO:1900006; GO:1900029	Cobl	Q5NBX1
-0.474558	15.7438	-8.24465	1.42e-06	0.000190823	5.67688	0.00014288	0.0181894	Reticulon-4 (Neurite outgrowth inhibitor) (Nogo protein)	RTN4_MOUSE	SUBCELLULAR LOCATION: Endoplasmic reticulum membrane {ECO:0000250|UniProtKB:Q9NQC3}; Multi-pass membrane protein {ECO:0000255}. Note=Anchored to the membrane of the endoplasmic reticulum through 2 putative transmembrane domains. Localizes throughout the ER tubular network. Co-localizes with TMEM33 at the ER sheets. {ECO:0000250|UniProtKB:Q9NQC3}.	axon [GO:0030424]; cell projection [GO:0042995]; dendritic growth cone [GO:0044294]; endoplasmic reticulum [GO:0005783]; endoplasmic reticulum membrane [GO:0005789]; endoplasmic reticulum tubular network [GO:0071782]; endoplasmic reticulum tubular network membrane [GO:0098826]; integral component of endoplasmic reticulum membrane [GO:0030176]; intracellular [GO:0005622]; neuronal cell body [GO:00…	GO:0001525; GO:0005622; GO:0005635; GO:0005783; GO:0005789; GO:0007399; GO:0007413; GO:0010634; GO:0014069; GO:0021801; GO:0030176; GO:0030308; GO:0030334; GO:0030424; GO:0030517; GO:0031625; GO:0033601; GO:0042995; GO:0043025; GO:0044294; GO:0045296; GO:0048694; GO:0050821; GO:0051292; GO:0051897; GO:0051960; GO:0060317; GO:0071782; GO:0071786; GO:0071787; GO:0098826; GO:1903860; GO:1905552; GO:…	Rtn4	Q99P72
-0.60775	15.3172	-8.24358	1.42e-06	0.000190823	5.67544	0.00014316	0.0182078	Transmembrane protein 165 (TPA-regulated locus protein) (Transmembrane protein PFT27) (Transmembrane protein TPARL)	TM165_MOUSE	SUBCELLULAR LOCATION: Golgi apparatus membrane {ECO:0000250}; Multi-pass membrane protein {ECO:0000250}. Golgi apparatus, trans-Golgi network membrane {ECO:0000250}. Lysosome membrane {ECO:0000250}. Early endosome membrane {ECO:0000250}. Late endosome membrane {ECO:0000250}.	early endosome membrane [GO:0031901]; endosome membrane [GO:0010008]; Golgi apparatus [GO:0005794]; integral component of membrane [GO:0016021]; intracellular membrane-bounded organelle [GO:0043231]; late endosome membrane [GO:0031902]; lysosomal membrane [GO:0005765]; trans-Golgi network membrane [GO:0032588]; cellular calcium ion homeostasis [GO:0006874]; Golgi calcium ion transport [GO:0032472…	GO:0005765; GO:0005794; GO:0006487; GO:0006874; GO:0010008; GO:0016021; GO:0031901; GO:0031902; GO:0032472; GO:0032588; GO:0035751; GO:0043231	Tmem165	P52875
-0.500236	16.8261	-8.23863	1.43e-06	0.000190823	5.66878	0.000144463	0.0182927	Delta(24)-sterol reductase (EC 1.3.1.72) (24-dehydrocholesterol reductase) (3-beta-hydroxysterol Delta-24-reductase)	DHC24_MOUSE	SUBCELLULAR LOCATION: Endoplasmic reticulum membrane {ECO:0000250}; Single-pass membrane protein {ECO:0000250}. Golgi apparatus membrane {ECO:0000250}; Single-pass membrane protein {ECO:0000250}.	cytoskeleton [GO:0005856]; cytosol [GO:0005829]; endoplasmic reticulum [GO:0005783]; endoplasmic reticulum membrane [GO:0005789]; Golgi membrane [GO:0000139]; integral component of membrane [GO:0016021]; nucleus [GO:0005634]; delta24(24-1) sterol reductase activity [GO:0000246]; delta24-sterol reductase activity [GO:0050614]; enzyme binding [GO:0019899]; flavin adenine dinucleotide binding [GO:00…	GO:0000139; GO:0000246; GO:0005634; GO:0005783; GO:0005789; GO:0005829; GO:0005856; GO:0006695; GO:0006979; GO:0007265; GO:0008104; GO:0008203; GO:0008285; GO:0009725; GO:0009888; GO:0016021; GO:0016125; GO:0016614; GO:0016628; GO:0019899; GO:0030539; GO:0031639; GO:0042605; GO:0042987; GO:0043066; GO:0043154; GO:0043588; GO:0050614; GO:0050660; GO:0055114; GO:0061024	Dhcr24	Q8VCH6
-0.601492	16.2501	-8.21696	1.48e-06	0.000192833	5.63955	0.000150303	0.0186644	Prolyl endopeptidase-like (EC 3.4.21.-) (Prolylendopeptidase-like)	PPCEL_MOUSE	SUBCELLULAR LOCATION: Cytoplasm, cytosol {ECO:0000250|UniProtKB:Q4J6C6}.	cytoskeleton [GO:0005856]; cytosol [GO:0005829]; Golgi apparatus [GO:0005794]; serine-type endopeptidase activity [GO:0004252]; serine-type exopeptidase activity [GO:0070008]; regulation of synaptic vesicle exocytosis [GO:2000300]	GO:0004252; GO:0005794; GO:0005829; GO:0005856; GO:0070008; GO:2000300	Prepl	Q8C167
0.548741	16.171	8.45882	1.07e-06	0.000178692	5.96232	0.000160959	0.0193069	Heat shock-related 70 kDa protein 2 (Heat shock protein 70.2)	HSP72_MOUSE	SUBCELLULAR LOCATION: Cytoplasm, cytoskeleton, spindle {ECO:0000269|PubMed:24557841}. Note=Colocalizes with SHCBP1L at spindle during the meiosis process (PubMed:24557841). {ECO:0000269|PubMed:24557841}.	CatSper complex [GO:0036128]; cell surface [GO:0009986]; cytosol [GO:0005829]; male germ cell nucleus [GO:0001673]; meiotic spindle [GO:0072687]; mitochondrion [GO:0005739]; myelin sheath [GO:0043209]; nucleoplasm [GO:0005654]; synaptonemal complex [GO:0000795]; ATP binding [GO:0005524]; chaperone binding [GO:0051087]; disordered domain specific binding [GO:0097718]; enzyme binding [GO:0019899]; …	GO:0000795; GO:0001673; GO:0001934; GO:0005524; GO:0005654; GO:0005739; GO:0005829; GO:0007140; GO:0007141; GO:0007283; GO:0007286; GO:0009408; GO:0009409; GO:0009986; GO:0010971; GO:0019899; GO:0032781; GO:0036128; GO:0042026; GO:0043209; GO:0048156; GO:0051082; GO:0051087; GO:0051861; GO:0070194; GO:0072687; GO:0090084; GO:0097718; GO:1901896	Hspa2	P17156
-0.574533	15.7171	-8.17127	1.57e-06	0.000194803	5.57773	0.000163349	0.019445	Double C2-like domain-containing protein alpha (Doc2-alpha)	DOC2A_MOUSE	SUBCELLULAR LOCATION: Cytoplasmic vesicle, secretory vesicle, synaptic vesicle membrane {ECO:0000250}; Peripheral membrane protein {ECO:0000250}. Cell junction, synapse, synaptosome {ECO:0000250}. Lysosome {ECO:0000250}.	cell junction [GO:0030054]; exocytic vesicle [GO:0070382]; lysosome [GO:0005764]; neuron projection [GO:0043005]; nucleolus [GO:0005730]; nucleus [GO:0005634]; plasma membrane [GO:0005886]; synaptic vesicle membrane [GO:0030672]; calcium ion binding [GO:0005509]; calcium-dependent phospholipid binding [GO:0005544]; clathrin binding [GO:0030276]; syntaxin binding [GO:0019905]; calcium ion-regulate…	GO:0005509; GO:0005544; GO:0005634; GO:0005730; GO:0005764; GO:0005886; GO:0006906; GO:0017158; GO:0019905; GO:0030054; GO:0030276; GO:0030672; GO:0043005; GO:0048791; GO:0070382	Doc2a	Q7TNF0
-0.549144	16.0698	-8.1635	1.59e-06	0.000194803	5.56719	0.000165671	0.0195772	Long-chain-fatty-acid--CoA ligase 5 (EC 6.2.1.3) (Long-chain acyl-CoA synthetase 5) (LACS 5)	ACSL5_MOUSE	SUBCELLULAR LOCATION: Mitochondrion {ECO:0000250}. Endoplasmic reticulum {ECO:0000250}. Mitochondrion outer membrane {ECO:0000250}; Single-pass type III membrane protein {ECO:0000250}. Endoplasmic reticulum membrane {ECO:0000250}; Single-pass type III membrane protein {ECO:0000250}.	endoplasmic reticulum [GO:0005783]; endoplasmic reticulum membrane [GO:0005789]; integral component of membrane [GO:0016021]; mitochondrial inner membrane [GO:0005743]; mitochondrial outer membrane [GO:0005741]; mitochondrion [GO:0005739]; nucleolus [GO:0005730]; nucleus [GO:0005634]; ATP binding [GO:0005524]; decanoate-CoA ligase activity [GO:0102391]; long-chain fatty acid-CoA ligase activity […	GO:0001676; GO:0004467; GO:0005524; GO:0005634; GO:0005730; GO:0005739; GO:0005741; GO:0005743; GO:0005783; GO:0005789; GO:0016021; GO:0102391; GO:2001236	Acsl5	Q8JZR0
-0.435284	16.3487	-8.1563	1.6e-06	0.000194803	5.55741	0.000167853	0.0196997	Ubiquitin carboxyl-terminal hydrolase 22 (EC 3.4.19.12) (Deubiquitinating enzyme 22) (Ubiquitin thioesterase 22) (Ubiquitin-specific-processing protease 22)	UBP22_MOUSE	SUBCELLULAR LOCATION: Nucleus {ECO:0000269|PubMed:27013495}.	nuclear speck [GO:0016607]; SAGA complex [GO:0000124]; enzyme binding [GO:0019899]; H4 histone acetyltransferase activity [GO:0010485]; ligand-dependent nuclear receptor transcription coactivator activity [GO:0030374]; thiol-dependent ubiquitin-specific protease activity [GO:0004843]; transcription coactivator activity [GO:0003713]; zinc ion binding [GO:0008270]; cell cycle [GO:0007049]; histone …	GO:0000124; GO:0003713; GO:0004843; GO:0006351; GO:0006511; GO:0007049; GO:0008270; GO:0010485; GO:0016574; GO:0016578; GO:0016579; GO:0016607; GO:0019899; GO:0030374; GO:0045893; GO:0045931	Usp22	Q5DU02
0.469066	15.3622	8.42859	1.11e-06	0.000178692	5.92238	0.000170043	0.0198209	Lysosomal alpha-glucosidase (EC 3.2.1.20) (Acid maltase)	LYAG_MOUSE	SUBCELLULAR LOCATION: Lysosome {ECO:0000250|UniProtKB:P10253}. Lysosome membrane {ECO:0000250|UniProtKB:P10253}.	lysosomal membrane [GO:0005765]; lysosome [GO:0005764]; membrane [GO:0016020]; alpha-1,4-glucosidase activity [GO:0004558]; carbohydrate binding [GO:0030246]; maltose alpha-glucosidase activity [GO:0032450]; oligo-1,6-glucosidase activity [GO:0004574]; cardiac muscle contraction [GO:0060048]; diaphragm contraction [GO:0002086]; glycogen catabolic process [GO:0005980]; glycogen metabolic process […	GO:0002026; GO:0002086; GO:0003007; GO:0004558; GO:0004574; GO:0005764; GO:0005765; GO:0005977; GO:0005980; GO:0006941; GO:0007040; GO:0007626; GO:0009888; GO:0016020; GO:0030246; GO:0032450; GO:0043181; GO:0046716; GO:0050884; GO:0050885; GO:0060048	Gaa	P70699
-0.671467	17.3094	-8.14168	1.64e-06	0.000195319	5.53755	0.00017236	0.0199475	Transmembrane protein 35A (Peroxisomal membrane protein 52) (PMP52)	TM35A_MOUSE	SUBCELLULAR LOCATION: Peroxisome membrane; Multi-pass membrane protein. Cytoplasmic vesicle {ECO:0000250}. Note=Shedding may lead to a soluble peptide. {ECO:0000250}.	cytoplasmic vesicle [GO:0031410]; integral component of membrane [GO:0016021]; peroxisomal membrane [GO:0005778]	GO:0005778; GO:0016021; GO:0031410	Tmem35a	Q9D328
-0.582119	16.067	-8.10532	1.72e-06	0.000200344	5.48802	0.000184073	0.0209358	Sorting nexin-10	SNX10_MOUSE	SUBCELLULAR LOCATION: Cytoplasm {ECO:0000269|PubMed:22174188}. Endosome membrane {ECO:0000269|PubMed:22174188}; Peripheral membrane protein {ECO:0000269|PubMed:22174188}; Cytoplasmic side {ECO:0000269|PubMed:22174188}. Cytoplasm, cytoskeleton, microtubule organizing center, centrosome {ECO:0000250}. Note=May also localize to nucleus and endoplasmic reticulum.	centrosome [GO:0005813]; endoplasmic reticulum [GO:0005783]; endosome [GO:0005768]; extrinsic component of endosome membrane [GO:0031313]; extrinsic component of membrane [GO:0019898]; nucleus [GO:0005634]; 1-phosphatidylinositol binding [GO:0005545]; ATPase binding [GO:0051117]; phosphatidylinositol binding [GO:0035091]; cellular response to leukemia inhibitory factor [GO:1990830]; cilium assemb…	GO:0005545; GO:0005634; GO:0005768; GO:0005783; GO:0005813; GO:0006897; GO:0007032; GO:0015031; GO:0016050; GO:0019898; GO:0030316; GO:0031313; GO:0035091; GO:0051117; GO:0060271; GO:0061512; GO:0071539; GO:1990830	Snx10	Q9CWT3
-0.429811	15.7116	-8.01006	1.96e-06	0.00021563	5.35744	0.000218405	0.0240249	Far upstream element-binding protein 1 (FBP) (FUSE-binding protein 1)	FUBP1_MOUSE	SUBCELLULAR LOCATION: Nucleus {ECO:0000305}.	nucleoplasm [GO:0005654]; nucleus [GO:0005634]; DNA binding [GO:0003677]; RNA binding [GO:0003723]; transcriptional activator activity, RNA polymerase II distal enhancer sequence-specific DNA binding [GO:0001205]; developmental cell growth [GO:0048588]; hematopoietic stem cell proliferation [GO:0071425]; positive regulation of gene expression [GO:0010628]; regulation of transcription by RNA polym…	GO:0001205; GO:0003677; GO:0003723; GO:0005634; GO:0005654; GO:0006357; GO:0010628; GO:0048103; GO:0048588; GO:0071425	Fubp1	Q91WJ8
-0.496286	16.0053	-7.93198	2.19e-06	0.000236637	5.24952	0.000250938	0.0267707	Lanosterol 14-alpha demethylase (LDM) (EC 1.14.13.70) (CYPLI) (Cytochrome P450 51A1) (Cytochrome P450-14DM) (Cytochrome P45014DM) (Cytochrome P450LI) (Sterol 14-alpha demethylase)	CP51A_MOUSE	SUBCELLULAR LOCATION: Endoplasmic reticulum membrane {ECO:0000305}. Microsome membrane {ECO:0000305}.	endoplasmic reticulum [GO:0005783]; endoplasmic reticulum membrane [GO:0005789]; integral component of membrane [GO:0016021]; organelle membrane [GO:0031090]; plasma membrane [GO:0005886]; heme binding [GO:0020037]; iron ion binding [GO:0005506]; sterol 14-demethylase activity [GO:0008398]; cholesterol biosynthetic process [GO:0006695]; cholesterol biosynthetic process via 24,25-dihydrolanosterol…	GO:0005506; GO:0005783; GO:0005789; GO:0005886; GO:0006694; GO:0006695; GO:0008398; GO:0016021; GO:0020037; GO:0031090; GO:0033488	Cyp51a1	Q8K0C4
-0.61305	15.1441	-7.91671	2.24e-06	0.000238023	5.22832	0.000257811	0.0273297	Phosphomevalonate kinase (PMKase) (EC 2.7.4.2)	PMVK_MOUSE	SUBCELLULAR LOCATION: Cytoplasm, cytosol {ECO:0000250|UniProtKB:Q15126}.	cytosol [GO:0005829]; peroxisome [GO:0005777]; ATP binding [GO:0005524]; phosphomevalonate kinase activity [GO:0004631]; cholesterol biosynthetic process [GO:0006695]; isopentenyl diphosphate biosynthetic process, mevalonate pathway [GO:0019287]; response to cholesterol [GO:0070723]; sterol biosynthetic process [GO:0016126]	GO:0004631; GO:0005524; GO:0005777; GO:0005829; GO:0006695; GO:0016126; GO:0019287; GO:0070723	Pmvk	Q9D1G2
0.434296	15.9592	8.1767	1.56e-06	0.000194803	5.58509	0.000266817	0.0280516	Carbonyl reductase family member 4 (EC 1.-.-.-) (3-ketoacyl-[acyl-carrier-protein] reductase beta subunit) (KAR beta subunit) (3-oxoacyl-[acyl-carrier-protein] reductase) (EC 1.1.1.-) (Quinone reductase CBR4)	CBR4_MOUSE	SUBCELLULAR LOCATION: Mitochondrion matrix {ECO:0000250|UniProtKB:Q8N4T8}.	mitochondrial matrix [GO:0005759]; mitochondrion [GO:0005739]; oxidoreductase complex [GO:1990204]; 3-oxoacyl-[acyl-carrier-protein] reductase (NADH) activity [GO:0047025]; NAD(P)H dehydrogenase (quinone) activity [GO:0003955]; NADPH binding [GO:0070402]; NADPH dehydrogenase (quinone) activity [GO:0008753]; quinone binding [GO:0048038]; daunorubicin metabolic process [GO:0044597]; doxorubicin met…	GO:0003955; GO:0005739; GO:0005759; GO:0006633; GO:0008753; GO:0044597; GO:0044598; GO:0047025; GO:0048038; GO:0051289; GO:0051290; GO:0055114; GO:0070402; GO:1990204	Cbr4	Q91VT4
0.442142	18.1297	8.09854	1.74e-06	0.000200344	5.47877	0.000306075	0.0310643	Protein Mpv17 (Mpv-17)	MPV17_MOUSE	SUBCELLULAR LOCATION: Mitochondrion inner membrane {ECO:0000250}; Multi-pass membrane protein {ECO:0000250}.	integral component of membrane [GO:0016021]; mitochondrial inner membrane [GO:0005743]; mitochondrion [GO:0005739]; peroxisome [GO:0005777]; cellular response to reactive oxygen species [GO:0034614]; glomerular basement membrane development [GO:0032836]; homeostatic process [GO:0042592]; inner ear development [GO:0048839]; mitochondrial genome maintenance [GO:0000002]; reactive oxygen species met…	GO:0000002; GO:0005739; GO:0005743; GO:0005777; GO:0016021; GO:0032836; GO:0034614; GO:0042592; GO:0048839; GO:0072593; GO:2000377	Mpv17	P19258
0.360095	16.7522	8.06235	1.83e-06	0.00020545	5.42927	0.000326032	0.0325171	Biliverdin reductase A (BVR A) (EC 1.3.1.24) (Biliverdin-IX alpha-reductase)	BIEA_MOUSE	SUBCELLULAR LOCATION: Cytoplasm {ECO:0000250}.	cytosol [GO:0005829]; biliverdin reductase activity [GO:0004074]; nucleotide binding [GO:0000166]; zinc ion binding [GO:0008270]; heme catabolic process [GO:0042167]; oxidation-reduction process [GO:0055114]	GO:0000166; GO:0004074; GO:0005829; GO:0008270; GO:0042167; GO:0055114	Blvra	Q9CY64
0.442218	16.5685	8.05654	1.84e-06	0.00020545	5.4213	0.000329351	0.0327538	CDGSH iron-sulfur domain-containing protein 2 (MitoNEET-related 1 protein) (Miner1) (Nervous system overexpressed protein 70)	CISD2_MOUSE	SUBCELLULAR LOCATION: Endoplasmic reticulum membrane {ECO:0000269|PubMed:19451219}; Single-pass membrane protein {ECO:0000269|PubMed:19451219}. Mitochondrion outer membrane {ECO:0000269|PubMed:19451219}; Single-pass membrane protein {ECO:0000269|PubMed:19451219}. Note=According to PubMed:19451219, it mainly localizes to the mitochondrion outer membrane and localizes only at low level to the endop…	endoplasmic reticulum [GO:0005783]; endoplasmic reticulum membrane [GO:0005789]; integral component of membrane [GO:0016021]; mitochondrial outer membrane [GO:0005741]; perinuclear region of cytoplasm [GO:0048471]; protein-containing complex [GO:0032991]; 2 iron, 2 sulfur cluster binding [GO:0051537]; metal ion binding [GO:0046872]; protein homodimerization activity [GO:0042803]; autophagy of mit…	GO:0000422; GO:0005741; GO:0005783; GO:0005789; GO:0010259; GO:0010506; GO:0016021; GO:0032991; GO:0042803; GO:0046872; GO:0048471; GO:0051537	Cisd2	Q9CQB5
-0.450428	16.6159	-7.76865	2.75e-06	0.000276182	5.02115	0.000334228	0.0330993	Iduronate 2-sulfatase (EC 3.1.6.13) (Alpha-L-iduronate sulfate sulfatase)	IDS_MOUSE	SUBCELLULAR LOCATION: Lysosome.	lysosome [GO:0005764]; iduronate-2-sulfatase activity [GO:0004423]; metal ion binding [GO:0046872]; sulfuric ester hydrolase activity [GO:0008484]; metabolic process [GO:0008152]	GO:0004423; GO:0005764; GO:0008152; GO:0008484; GO:0046872	Ids	Q08890
-0.399435	15.9299	-7.7157	2.97e-06	0.000285997	4.94635	0.000366365	0.035305	Ectoderm-neural cortex protein 1 (ENC-1)	ENC1_MOUSE	SUBCELLULAR LOCATION: Nucleus matrix {ECO:0000250}. Cytoplasm. Cytoplasm, cytoskeleton. Note=Interacts with the actin cytoskeleton.	Cul3-RING ubiquitin ligase complex [GO:0031463]; cytoplasm [GO:0005737]; cytoskeleton [GO:0005856]; neuronal cell body [GO:0043025]; nuclear chromatin [GO:0000790]; nuclear matrix [GO:0016363]; nucleolus [GO:0005730]; nucleoplasm [GO:0005654]; actin binding [GO:0003779]; negative regulation of translation [GO:0017148]; positive regulation of neuron projection development [GO:0010976]; proteasomal…	GO:0000790; GO:0003779; GO:0005654; GO:0005730; GO:0005737; GO:0005856; GO:0010499; GO:0010976; GO:0016363; GO:0016567; GO:0017148; GO:0031463; GO:0043025	Enc1	O35709
-0.426748	14.9842	-7.69485	3.06e-06	0.000285997	4.91678	0.000379796	0.0361921	G protein-coupled receptor kinase 6 (EC 2.7.11.16) (G protein-coupled receptor kinase GRK6)	GRK6_MOUSE	SUBCELLULAR LOCATION: Membrane; Lipid-anchor.	membrane [GO:0016020]; ATP binding [GO:0005524]; beta-adrenergic receptor kinase activity [GO:0047696]; G-protein coupled receptor kinase activity [GO:0004703]; Wnt signaling pathway [GO:0016055]	GO:0004703; GO:0005524; GO:0016020; GO:0016055; GO:0047696	Grk6	O70293
-0.407364	14.8592	-7.67079	3.17e-06	0.00029204	4.8826	0.000395863	0.0372276	Noelin-3 (Olfactomedin-3) (Optimedin)	NOE3_MOUSE	SUBCELLULAR LOCATION: Secreted {ECO:0000269|PubMed:22632720}. Cell junction, synapse {ECO:0000305|PubMed:22632720}. Note=Isoform 2 is secreted more efficiently than isoform 1.	AMPA glutamate receptor complex [GO:0032281]; cell junction [GO:0030054]; extracellular space [GO:0005615]; Golgi apparatus [GO:0005794]; synapse [GO:0045202]; eye photoreceptor cell development [GO:0042462]	GO:0005615; GO:0005794; GO:0030054; GO:0032281; GO:0042462; GO:0045202	Olfm3	P63056
-0.492438	15.0652	-7.6176	3.42e-06	0.000310483	4.80675	0.000433668	0.03956	Protein dopey-2	DOP2_MOUSE		cytosol [GO:0005829]; endosome [GO:0005768]; trans-Golgi network [GO:0005802]; cognition [GO:0050890]; Golgi to endosome transport [GO:0006895]; protein transport [GO:0015031]	GO:0005768; GO:0005802; GO:0005829; GO:0006895; GO:0015031; GO:0050890	Dopey2	Q3UHQ6
-0.526811	15.2671	-7.60966	3.46e-06	0.000310483	4.7954	0.00043959	0.0399128	Coiled-coil domain-containing protein 136	CC136_MOUSE	SUBCELLULAR LOCATION: Cytoplasmic vesicle, secretory vesicle, acrosome membrane {ECO:0000269|PubMed:27076447}; Single-pass membrane protein {ECO:0000305}. Note=Exclusively localized on a peripheral part of acrosome membrane (Golgi phase), localized on the equatorial segment of the acrosome (maturation phase). {ECO:0000269|PubMed:27076447}.	acrosomal membrane [GO:0002080]; integral component of membrane [GO:0016021]; mitochondrion [GO:0005739]; acrosome assembly [GO:0001675]; single fertilization [GO:0007338]; spermatogenesis [GO:0007283]	GO:0001675; GO:0002080; GO:0005739; GO:0007283; GO:0007338; GO:0016021	Ccdc136	Q3TVA9
0.615188	14.297	7.85546	2.44e-06	0.00025544	5.14298	0.000465535	0.0414202	Epididymis-specific alpha-mannosidase (EC 3.2.1.24) (Mannosidase alpha class 2B member 2)	MA2B2_MOUSE	SUBCELLULAR LOCATION: Secreted.	extracellular space [GO:0005615]; alpha-mannosidase activity [GO:0004559]; carbohydrate binding [GO:0030246]; metal ion binding [GO:0046872]; mannose metabolic process [GO:0006013]; protein deglycosylation [GO:0006517]	GO:0004559; GO:0005615; GO:0006013; GO:0006517; GO:0030246; GO:0046872	Man2b2	O54782
0.396737	16.2207	7.79941	2.64e-06	0.000272313	5.06444	0.000511965	0.0439719	Arfaptin-2 (ADP-ribosylation factor-interacting protein 2)	ARFP2_MOUSE		cell cortex [GO:0005938]; cytoplasm [GO:0005737]; ruffle [GO:0001726]; trans-Golgi network membrane [GO:0032588]; cadherin binding [GO:0045296]; GTP-dependent protein binding [GO:0030742]; identical protein binding [GO:0042802]; phosphatidylinositol-4-phosphate binding [GO:0070273]; protein domain specific binding [GO:0019904]; actin cytoskeleton organization [GO:0030036]; regulation of Arp2/3 co…	GO:0001726; GO:0005737; GO:0005938; GO:0019904; GO:0030036; GO:0030742; GO:0031529; GO:0032588; GO:0034315; GO:0042802; GO:0045296; GO:0070273	Arfip2	Q8K221
-0.619904	16.5215	-7.51346	3.97e-06	0.000352117	4.65713	0.000517634	0.0442714	Neuroendocrine convertase 2 (NEC 2) (EC 3.4.21.94) (KEX2-like endoprotease 2) (Prohormone convertase 2) (Proprotein convertase 2) (PC2)	NEC2_MOUSE	SUBCELLULAR LOCATION: Cytoplasmic vesicle, secretory vesicle {ECO:0000250|UniProtKB:P16519}. Secreted {ECO:0000250|UniProtKB:P16519}. Note=Localized in the secretion granules. {ECO:0000250|UniProtKB:P16519}.	dendrite [GO:0030425]; endoplasmic reticulum lumen [GO:0005788]; extracellular space [GO:0005615]; intracellular membrane-bounded organelle [GO:0043231]; membrane [GO:0016020]; nucleus [GO:0005634]; perikaryon [GO:0043204]; secretory granule lumen [GO:0034774]; transport vesicle [GO:0030133]; endopeptidase activity [GO:0004175]; serine-type endopeptidase activity [GO:0004252]; enkephalin processi…	GO:0004175; GO:0004252; GO:0005615; GO:0005634; GO:0005788; GO:0006508; GO:0007399; GO:0016020; GO:0016485; GO:0016486; GO:0016540; GO:0030070; GO:0030133; GO:0030425; GO:0034230; GO:0034231; GO:0034774; GO:0043204; GO:0043231	Pcsk2	P21661
0.514212	16.2299	7.77773	2.72e-06	0.000276182	5.03394	0.000531055	0.0449705	Intercellular adhesion molecule 5 (ICAM-5) (Telencephalin)	ICAM5_MOUSE	SUBCELLULAR LOCATION: Membrane {ECO:0000269|PubMed:7794412}; Single-pass type I membrane protein {ECO:0000269|PubMed:7794412}.	integral component of plasma membrane [GO:0005887]; plasma membrane [GO:0005886]; integrin binding [GO:0005178]; cell adhesion [GO:0007155]; cell-cell adhesion [GO:0098609]; phagocytosis [GO:0006909]	GO:0005178; GO:0005886; GO:0005887; GO:0006909; GO:0007155; GO:0098609	Icam5	Q60625
0.420886	16.0166	7.75081	2.82e-06	0.00027921	4.99599	0.000555684	0.0462181	Quinone oxidoreductase (EC 1.6.5.5) (NADPH:quinone reductase) (Zeta-crystallin)	QOR_MOUSE	SUBCELLULAR LOCATION: Cytoplasm {ECO:0000250}.	cytosol [GO:0005829]; mRNA 3'-UTR binding [GO:0003730]; NADP binding [GO:0050661]; NADPH binding [GO:0070402]; NADPH:quinone reductase activity [GO:0003960]; zinc ion binding [GO:0008270]; protein homotetramerization [GO:0051289]; xenobiotic catabolic process [GO:0042178]	GO:0003730; GO:0003960; GO:0005829; GO:0008270; GO:0042178; GO:0050661; GO:0051289; GO:0070402	Cryz	P47199
-0.365683	15.8633	-7.45218	4.34e-06	0.000380008	4.56839	0.000573883	0.0471117	E3 ubiquitin-protein ligase LRSAM1 (EC 2.3.2.27) (Leucine-rich repeat and sterile alpha motif-containing protein 1) (RING-type E3 ubiquitin transferase LRSAM1) (Tsg101-associated ligase)	LRSM1_MOUSE	SUBCELLULAR LOCATION: Cytoplasm {ECO:0000250|UniProtKB:Q6UWE0}. Note=Displays a punctuate distribution and localizes to a submembranal ring (PubMed:15256501). Localizes to intracellular bacterial pathogens (By similarity). {ECO:0000250|UniProtKB:Q6UWE0}.	cytoplasm [GO:0005737]; cytosol [GO:0005829]; membrane [GO:0016020]; plasma membrane [GO:0005886]; metal ion binding [GO:0046872]; ubiquitin protein ligase activity [GO:0061630]; ubiquitin-protein transferase activity [GO:0004842]; autophagy [GO:0006914]; negative regulation of endocytosis [GO:0045806]; positive regulation of autophagosome assembly [GO:2000786]; positive regulation of xenophagy […	GO:0000209; GO:0004842; GO:0005737; GO:0005829; GO:0005886; GO:0006914; GO:0007165; GO:0016020; GO:0030163; GO:0045806; GO:0046755; GO:0046872; GO:0051865; GO:0061630; GO:0070086; GO:1904417; GO:2000786	Lrsam1	Q80ZI6
0.68164	15.4107	7.71392	2.98e-06	0.000285997	4.94382	0.000591163	0.0479391	Diphthine--ammonia ligase (EC 6.3.1.14) (ATP-binding domain-containing protein 4) (Diphthamide synthase) (Diphthamide synthetase) (Protein DPH6 homolog)	DPH6_MOUSE		nucleolus [GO:0005730]; nucleus [GO:0005634]; ATP binding [GO:0005524]; diphthine-ammonia ligase activity [GO:0017178]; peptidyl-diphthamide biosynthetic process from peptidyl-histidine [GO:0017183]; positive regulation of protein targeting to mitochondrion [GO:1903955]; regulation of protein stability [GO:0031647]	GO:0005524; GO:0005634; GO:0005730; GO:0017178; GO:0017183; GO:0031647; GO:1903955	Dph6	Q9CQ28
0.49086	17.0041	7.69558	3.06e-06	0.000285997	4.91783	0.00060957	0.0487984	ATP-dependent 6-phosphofructokinase, liver type (ATP-PFK) (PFK-L) (EC 2.7.1.11) (6-phosphofructokinase type B) (Phosphofructo-1-kinase isozyme B) (PFK-B) (Phosphohexokinase)	PFKAL_MOUSE	SUBCELLULAR LOCATION: Cytoplasm {ECO:0000255|HAMAP-Rule:MF_03184}.	6-phosphofructokinase complex [GO:0005945]; cytosol [GO:0005829]; 6-phosphofructokinase activity [GO:0003872]; ATP binding [GO:0005524]; fructose binding [GO:0070061]; fructose-6-phosphate binding [GO:0070095]; identical protein binding [GO:0042802]; kinase binding [GO:0019900]; metal ion binding [GO:0046872]; fructose 1,6-bisphosphate metabolic process [GO:0030388]; fructose 6-phosphate metaboli…	GO:0003872; GO:0005524; GO:0005829; GO:0005945; GO:0006002; GO:0006096; GO:0009749; GO:0019900; GO:0030388; GO:0042802; GO:0046676; GO:0046872; GO:0051259; GO:0051289; GO:0061615; GO:0070061; GO:0070095	Pfkl	P12382
-0.637475	13.6322	-7.40084	4.68e-06	0.000395338	4.49365	0.00062534	0.0495174	Guanidinoacetate N-methyltransferase (EC 2.1.1.2)	GAMT_MOUSE	SUBCELLULAR LOCATION: Cell projection, microvillus {ECO:0000269|PubMed:8312439}. Note=Detected in microvilli of the epithelial cells lining the caput epididymis.	cytoplasm [GO:0005737]; microvillus [GO:0005902]; nucleus [GO:0005634]; guanidinoacetate N-methyltransferase activity [GO:0030731]; animal organ morphogenesis [GO:0009887]; creatine biosynthetic process [GO:0006601]; regulation of multicellular organism growth [GO:0040014]; S-adenosylhomocysteine metabolic process [GO:0046498]; S-adenosylmethionine metabolic process [GO:0046500]; spermatogenesis …	GO:0005634; GO:0005737; GO:0005902; GO:0006601; GO:0007283; GO:0009887; GO:0030731; GO:0040014; GO:0046498; GO:0046500	Gamt	O35969
-0.492894	17.3741	-7.39339	4.73e-06	0.000395338	4.48277	0.000633153	0.0498679	Retinol dehydrogenase 11 (EC 1.1.1.300) (Androgen-regulated short-chain dehydrogenase/reductase 1) (Cell line MC/9.IL4-derived protein 1) (M42C60) (Prostate short-chain dehydrogenase/reductase 1) (Retinal reductase 1) (RalR1) (Short-chain aldehyde dehydrogenase) (SCALD)	RDH11_MOUSE	SUBCELLULAR LOCATION: Endoplasmic reticulum membrane {ECO:0000250}; Single-pass type II membrane protein {ECO:0000250}.	endoplasmic reticulum membrane [GO:0005789]; integral component of membrane [GO:0016021]; intracellular [GO:0005622]; photoreceptor inner segment [GO:0001917]; NADP-retinol dehydrogenase activity [GO:0052650]; oxidoreductase activity [GO:0016491]; retinol dehydrogenase activity [GO:0004745]; adaptation of rhodopsin mediated signaling [GO:0016062]; retinal metabolic process [GO:0042574]; retinol m…	GO:0001917; GO:0004745; GO:0005622; GO:0005789; GO:0016021; GO:0016062; GO:0016491; GO:0042572; GO:0042574; GO:0052650	Rdh11	Q9QYF1
-0.396813	15.6522	-7.3869	4.77e-06	0.000395338	4.47329	0.000640037	0.0501735	cAMP-dependent protein kinase type I-beta regulatory subunit	KAP1_MOUSE	SUBCELLULAR LOCATION: Cell membrane {ECO:0000250}.	cAMP-dependent protein kinase complex [GO:0005952]; cytoplasm [GO:0005737]; plasma membrane [GO:0005886]; cAMP binding [GO:0030552]; cAMP-dependent protein kinase inhibitor activity [GO:0004862]; cAMP-dependent protein kinase regulator activity [GO:0008603]; protein kinase A catalytic subunit binding [GO:0034236]; animal organ morphogenesis [GO:0009887]; cell proliferation [GO:0008283]; learning …	GO:0004862; GO:0005737; GO:0005886; GO:0005952; GO:0006468; GO:0007611; GO:0008283; GO:0008603; GO:0009887; GO:0030552; GO:0034236; GO:2000480	Prkar1b	P12849
-0.35103	15.6562	-7.38307	4.8e-06	0.000395338	4.46768	0.000644132	0.050354	Mitogen-activated protein kinase 7 (MAP kinase 7) (MAPK 7) (EC 2.7.11.24) (Big MAP kinase 1) (BMK-1) (Extracellular signal-regulated kinase 5) (ERK-5)	MK07_MOUSE	SUBCELLULAR LOCATION: Cytoplasm {ECO:0000269|PubMed:11139578}. Nucleus {ECO:0000269|PubMed:11139578}. Nucleus, PML body {ECO:0000250}. Note=Translocates to the nucleus upon activation. {ECO:0000250}.; SUBCELLULAR LOCATION: Isoform 1: Cytoplasm {ECO:0000250}. Nucleus {ECO:0000250}. Note=Isoform 1 is detected in cytoplasm and nucleus. {ECO:0000250}.; SUBCELLULAR LOCATION: Isoform 2: Nucleus {ECO:00…	cytoplasm [GO:0005737]; cytosol [GO:0005829]; nucleoplasm [GO:0005654]; nucleus [GO:0005634]; PML body [GO:0016605]; ATP binding [GO:0005524]; mitogen-activated protein kinase binding [GO:0051019]; protein kinase activity [GO:0004672]; protein serine/threonine kinase activity [GO:0004674]; cell cycle [GO:0007049]; cell differentiation [GO:0030154]; cellular response to growth factor stimulus [GO:…	GO:0004672; GO:0004674; GO:0005524; GO:0005634; GO:0005654; GO:0005737; GO:0005829; GO:0006468; GO:0007049; GO:0010468; GO:0016605; GO:0018105; GO:0030154; GO:0034115; GO:0036003; GO:0043066; GO:0043407; GO:0045765; GO:0045944; GO:0051019; GO:0051247; GO:0060761; GO:0070301; GO:0070377; GO:0070885; GO:0071310; GO:0071363; GO:0071499; GO:0071560; GO:1902176; GO:2000352; GO:2001240	Mapk7	Q9WVS8
-0.438078	15.0257	-7.34775	5.05e-06	0.000396347	4.41597	0.000683041	0.05202	SPATS2-like protein	SPS2L_MOUSE	SUBCELLULAR LOCATION: Cytoplasm {ECO:0000250}. Nucleus, nucleolus {ECO:0000250}.	cytosol [GO:0005829]; nucleolus [GO:0005730]; nucleus [GO:0005634]; protein-containing complex [GO:0032991]	GO:0005634; GO:0005730; GO:0005829; GO:0032991	Spats2l	Q91WJ7
-0.761009	13.6066	-7.34272	5.09e-06	0.000396347	4.40858	0.000688761	0.0522577	Ermin (Juxtanodin) (JN)	ERMIN_MOUSE	SUBCELLULAR LOCATION: Cytoplasm, cytoskeleton {ECO:0000269|PubMed:16421295}.	cell cortex [GO:0005938]; cytoplasm [GO:0005737]; cytoskeleton [GO:0005856]; filopodium [GO:0030175]; internode region of axon [GO:0033269]; myelin sheath [GO:0043209]; neuronal cell body [GO:0043025]; paranode region of axon [GO:0033270]; actin filament binding [GO:0051015]; actin filament organization [GO:0007015]; morphogenesis of a branching structure [GO:0001763]; regulation of cell projecti…	GO:0001763; GO:0005737; GO:0005856; GO:0005938; GO:0007015; GO:0008360; GO:0030175; GO:0031344; GO:0033269; GO:0033270; GO:0043025; GO:0043209; GO:0051015	Ermn	Q5EBJ4
-0.389066	15.4073	-7.32319	5.24e-06	0.000396347	4.3799	0.000711378	0.0531803	Ras-related GTP-binding protein B (Rag B) (RagB)	RRAGB_MOUSE	SUBCELLULAR LOCATION: Cytoplasm {ECO:0000250|UniProtKB:Q5VZM2}. Lysosome {ECO:0000250|UniProtKB:Q5VZM2}.	cytoplasm [GO:0005737]; EGO complex [GO:0034448]; Gtr1-Gtr2 GTPase complex [GO:1990131]; lysosome [GO:0005764]; nucleus [GO:0005634]; GTP binding [GO:0005525]; GTPase activity [GO:0003924]; GTPase binding [GO:0051020]; guanyl ribonucleotide binding [GO:0032561]; protein heterodimerization activity [GO:0046982]; cellular protein localization [GO:0034613]; cellular response to amino acid starvation…	GO:0003924; GO:0005525; GO:0005634; GO:0005737; GO:0005764; GO:0009267; GO:0010506; GO:0032006; GO:0032008; GO:0032561; GO:0034198; GO:0034448; GO:0034613; GO:0046982; GO:0051020; GO:0071230; GO:1904263; GO:1990131; GO:1990253	Rragb	Q6NTA4
-0.462884	15.1198	-7.32253	5.25e-06	0.000396347	4.37893	0.000712149	0.0532113	Protocadherin alpha-4 (PCDH-alpha-4)	PCDA4_MOUSE	SUBCELLULAR LOCATION: Cell membrane {ECO:0000269|PubMed:9655502}; Single-pass type I membrane protein {ECO:0000305|PubMed:27161523, ECO:0000305|PubMed:9655502}. Note=Detected in dendrites and synapses. {ECO:0000269|PubMed:9655502}.	endoplasmic reticulum [GO:0005783]; integral component of plasma membrane [GO:0005887]; membrane [GO:0016020]; synapse [GO:0045202]; calcium ion binding [GO:0005509]; identical protein binding [GO:0042802]; cell adhesion [GO:0007155]; cell-cell signaling [GO:0007267]; homophilic cell adhesion via plasma membrane adhesion molecules [GO:0007156]; nervous system development [GO:0007399]	GO:0005509; GO:0005783; GO:0005887; GO:0007155; GO:0007156; GO:0007267; GO:0007399; GO:0016020; GO:0042802; GO:0045202	Pcdha4	O88689
-0.410138	15.8416	-7.31873	5.28e-06	0.000396347	4.37333	0.000716643	0.0533912	Neuron navigator 1 (Pore membrane and/or filament-interacting-like protein 3)	NAV1_MOUSE	SUBCELLULAR LOCATION: Cytoplasm, cytoskeleton {ECO:0000269|PubMed:15797708}. Note=Associates with a subset of microtubule plus ends. Enriched in neuronal growth cones.	axon initial segment [GO:0043194]; cytoplasm [GO:0005737]; microtubule [GO:0005874]; microtubule cytoskeleton [GO:0015630]; microtubule bundle formation [GO:0001578]; neuron migration [GO:0001764]	GO:0001578; GO:0001764; GO:0005737; GO:0005874; GO:0015630; GO:0043194	Nav1	Q8CH77
-0.55411	15.3323	-7.31205	5.33e-06	0.000396347	4.36351	0.00072459	0.0537068	Potassium/sodium hyperpolarization-activated cyclic nucleotide-gated channel 3 (Hyperpolarization-activated cation channel 3) (HAC-3)	HCN3_MOUSE	SUBCELLULAR LOCATION: Cell membrane {ECO:0000269|PubMed:15923185, ECO:0000269|PubMed:23382386}; Multi-pass membrane protein {ECO:0000269|PubMed:15923185}.	cone cell pedicle [GO:0044316]; dendrite [GO:0030425]; integral component of plasma membrane [GO:0005887]; neuronal cell body [GO:0043025]; plasma membrane [GO:0005886]; cAMP binding [GO:0030552]; voltage-gated potassium channel activity [GO:0005249]; voltage-gated sodium channel activity [GO:0005248]; cellular response to dopamine [GO:1903351]; potassium ion transmembrane transport [GO:0071805];…	GO:0005248; GO:0005249; GO:0005886; GO:0005887; GO:0030425; GO:0030552; GO:0034765; GO:0035725; GO:0042391; GO:0043025; GO:0044316; GO:0071805; GO:0072718; GO:1903351	Hcn3	O88705
-0.48285	15.7074	-7.29304	5.48e-06	0.000403278	4.33551	0.000747653	0.0547148	Armadillo repeat-containing protein 6	ARMC6_MOUSE		cytosol [GO:0005829]; hematopoietic progenitor cell differentiation [GO:0002244]	GO:0002244; GO:0005829	Armc6	Q8BNU0
-0.512833	15.5242	-7.27909	5.59e-06	0.000407342	4.31492	0.00076502	0.0554572	NAC-alpha domain-containing protein 1	NACAD_MOUSE	SUBCELLULAR LOCATION: Cytoplasm {ECO:0000250}. Nucleus {ECO:0000250}.	nascent polypeptide-associated complex [GO:0005854]; nucleus [GO:0005634]; protein transport [GO:0015031]	GO:0005634; GO:0005854; GO:0015031	Nacad	Q5SWP3
-0.498651	15.4908	-7.25027	5.84e-06	0.000420533	4.27232	0.000802067	0.057397	Coronin-2A	COR2A_MOUSE		actin cytoskeleton [GO:0015629]; brush border [GO:0005903]; transcriptional repressor complex [GO:0017053]; actin binding [GO:0003779]; actin filament binding [GO:0051015]; actin cytoskeleton organization [GO:0030036]	GO:0003779; GO:0005903; GO:0015629; GO:0017053; GO:0030036; GO:0051015	Coro2a	Q8C0P5
-0.461371	16.1517	-7.21061	6.19e-06	0.000435535	4.21348	0.000855791	0.0601231	Transferrin receptor protein 1 (TR) (TfR) (TfR1) (Trfr) (CD antigen CD71)	TFR1_MOUSE	SUBCELLULAR LOCATION: Cell membrane {ECO:0000250|UniProtKB:P02786}; Single-pass type II membrane protein {ECO:0000250|UniProtKB:P02786}. Melanosome {ECO:0000250|UniProtKB:P02786}.	basolateral plasma membrane [GO:0016323]; cell surface [GO:0009986]; clathrin-coated pit [GO:0005905]; cytoplasmic vesicle [GO:0031410]; early endosome [GO:0005769]; endosome [GO:0005768]; endosome membrane [GO:0010008]; external side of plasma membrane [GO:0009897]; extracellular exosome [GO:0070062]; extracellular region [GO:0005576]; HFE-transferrin receptor complex [GO:1990712]; integral comp…	GO:0003725; GO:0004998; GO:0005381; GO:0005576; GO:0005768; GO:0005769; GO:0005886; GO:0005887; GO:0005905; GO:0006879; GO:0009897; GO:0009986; GO:0010008; GO:0016020; GO:0016323; GO:0030316; GO:0030890; GO:0031410; GO:0031623; GO:0031668; GO:0033570; GO:0033572; GO:0035690; GO:0042102; GO:0042470; GO:0042802; GO:0042803; GO:0045780; GO:0045830; GO:0048471; GO:0055037; GO:0070062; GO:0071281; GO:…	Tfrc	Q62351
0.406523	15.3138	7.41953	4.55e-06	0.000393555	4.52089	0.000959631	0.0651196	Dual specificity protein phosphatase 23 (EC 3.1.3.16) (EC 3.1.3.48) (Low molecular mass dual specificity phosphatase 3) (LDP-3)	DUS23_MOUSE	SUBCELLULAR LOCATION: Cytoplasm, cytosol {ECO:0000250}. Nucleus {ECO:0000250}. Note=Mainly cytosolic. Weakly nuclear (By similarity). {ECO:0000250}.	cytoplasm [GO:0005737]; cytosol [GO:0005829]; nucleoplasm [GO:0005654]; nucleus [GO:0005634]; phosphatase activity [GO:0016791]; protein serine/threonine phosphatase activity [GO:0004722]; protein tyrosine phosphatase activity [GO:0004725]; protein tyrosine/serine/threonine phosphatase activity [GO:0008138]; dephosphorylation [GO:0016311]	GO:0004722; GO:0004725; GO:0005634; GO:0005654; GO:0005737; GO:0005829; GO:0008138; GO:0016311; GO:0016791	Dusp23	Q6NT99
-0.48871	14.3471	-7.10486	7.25e-06	0.000478663	4.05555	0.00101576	0.0676813	Dysbindin domain-containing protein 1	DBND1_MOUSE		synaptic vesicle membrane [GO:0030672]; neuron projection development [GO:0031175]	GO:0030672; GO:0031175	Dbndd1	Q9CZ00
-0.651284	16.8186	-7.10474	7.25e-06	0.000478663	4.05537	0.00101596	0.0676903	Breast carcinoma-amplified sequence 1 homolog (Novel amplified in breast cancer 1 homolog)	BCAS1_MOUSE	SUBCELLULAR LOCATION: Cytoplasm {ECO:0000250}.	cytosol [GO:0005829]; protein homodimerization activity [GO:0042803]	GO:0005829; GO:0042803	Bcas1	Q80YN3
-0.431534	14.7483	-7.10352	7.26e-06	0.000478663	4.05354	0.00101796	0.0677795	Rho guanine nucleotide exchange factor 28 (190 kDa guanine nucleotide exchange factor) (p190-RhoGEF) (p190RhoGEF) (Rho guanine nucleotide exchange factor) (Rho-interacting protein 2)	ARG28_MOUSE	SUBCELLULAR LOCATION: Cytoplasm. Cell membrane. Note=Colocalizes with the microtubule radial and cortical systems.	cytoplasm [GO:0005737]; plasma membrane [GO:0005886]; guanyl-nucleotide exchange factor activity [GO:0005085]; metal ion binding [GO:0046872]; Rho guanyl-nucleotide exchange factor activity [GO:0005089]; RNA binding [GO:0003723]; central nervous system neuron axonogenesis [GO:0021955]; intracellular signal transduction [GO:0035556]; neurofilament cytoskeleton organization [GO:0060052]; regulation…	GO:0003723; GO:0005085; GO:0005089; GO:0005737; GO:0005886; GO:0021955; GO:0035023; GO:0035556; GO:0046872; GO:0060052	Arhgef28	P97433
0.597879	15.2563	7.32374	5.24e-06	0.000396347	4.38071	0.00111942	0.0721759	Glycerol-3-phosphate dehydrogenase [NAD(+)], cytoplasmic (GPD-C) (GPDH-C) (EC 1.1.1.8)	GPDA_MOUSE	SUBCELLULAR LOCATION: Cytoplasm.	cytosol [GO:0005829]; glycerol-3-phosphate dehydrogenase complex [GO:0009331]; mitochondrion [GO:0005739]; glycerol-3-phosphate dehydrogenase [NAD+] activity [GO:0004367]; glycerol-3-phosphate dehydrogenase activity [GO:0004368]; NAD binding [GO:0051287]; protein homodimerization activity [GO:0042803]; cellular response to cAMP [GO:0071320]; cellular response to tumor necrosis factor [GO:0071356]…	GO:0004367; GO:0004368; GO:0005739; GO:0005829; GO:0006072; GO:0006094; GO:0006116; GO:0006127; GO:0009331; GO:0042803; GO:0045821; GO:0046168; GO:0046486; GO:0051287; GO:0071320; GO:0071356	Gpd1	P13707
-0.505611	15.3885	-7.04159	7.97e-06	0.000510818	3.96029	0.0011243	0.0723802	Rab proteins geranylgeranyltransferase component A 2 (Choroideremia-like protein) (Rab escort protein 2) (REP-2)	RAE2_MOUSE	SUBCELLULAR LOCATION: Cytoplasm, cytosol {ECO:0000250}.	cytosol [GO:0005829]; nucleoplasm [GO:0005654]; nucleus [GO:0005634]; Rab-protein geranylgeranyltransferase complex [GO:0005968]; GDP-dissociation inhibitor activity [GO:0005092]; GTPase activator activity [GO:0005096]; Rab GTPase binding [GO:0017137]; intracellular protein transport [GO:0006886]; protein geranylgeranylation [GO:0018344]; small GTPase mediated signal transduction [GO:0007264]	GO:0005092; GO:0005096; GO:0005634; GO:0005654; GO:0005829; GO:0005968; GO:0006886; GO:0007264; GO:0017137; GO:0018344	Chml	Q9QZD5
0.476453	16.0925	7.31989	5.27e-06	0.000396347	4.37504	0.00112634	0.0724656	Ataxin-7-like protein 3B	A7L3B_MOUSE	SUBCELLULAR LOCATION: Cytoplasm {ECO:0000250|UniProtKB:Q96GX2}.	cytoplasm [GO:0005737]; regulation of gene expression [GO:0010468]	GO:0005737; GO:0010468	Atxn7l3b	Q3UD01
0.417841	15.572	7.31886	5.27e-06	0.000396347	4.37353	0.00112818	0.0725427	Spermatogenesis-associated serine-rich protein 2 (Serine-rich spermatocytes and round spermatid 59 kDa protein) (p59scr)	SPAS2_MOUSE	SUBCELLULAR LOCATION: Cytoplasm {ECO:0000269|PubMed:11944913}.	cytoplasm [GO:0005737]; cytosol [GO:0005829]	GO:0005737; GO:0005829	Spats2	Q8K1N4
-0.345426	16.3098	-7.02623	8.16e-06	0.000517072	3.93708	0.00115221	0.0735378	TSC22 domain family protein 3 (Glucocorticoid-induced leucine zipper protein) (TSC22-related-inducible leucine zipper 3) (Tilz3)	T22D3_MOUSE	SUBCELLULAR LOCATION: Isoform 1: Cytoplasm. Nucleus. Note=Localization depends on differentiation status of myoblasts. In undifferentiated myoblasts, isoform 1 localizes to the cytoplasm, but in differentiating myoblasts, isoform 1 is localized to the nucleus.; SUBCELLULAR LOCATION: Isoform 4: Cytoplasm. Nucleus. Note=Localization depends on differentiation status of myoblasts. In undifferentiate…	cytoplasm [GO:0005737]; nucleus [GO:0005634]; DNA binding transcription factor activity [GO:0003700]; MRF binding [GO:0043426]; negative regulation of activation-induced cell death of T cells [GO:0070236]; negative regulation of skeletal muscle tissue development [GO:0048642]; negative regulation of transcription by RNA polymerase II [GO:0000122]; response to osmotic stress [GO:0006970]	GO:0000122; GO:0003700; GO:0005634; GO:0005737; GO:0006970; GO:0043426; GO:0048642; GO:0070236	Tsc22d3	Q9Z2S7
-0.602877	16.768	-7.01715	8.27e-06	0.000517072	3.92336	0.001169	0.0742244	Oligoribonuclease, mitochondrial (EC 3.1.-.-) (RNA exonuclease 2 homolog) (Small fragment nuclease)	ORN_MOUSE	SUBCELLULAR LOCATION: Mitochondrion intermembrane space {ECO:0000250}. Mitochondrion matrix {ECO:0000250}.	focal adhesion [GO:0005925]; mitochondrial intermembrane space [GO:0005758]; mitochondrial matrix [GO:0005759]; mitochondrion [GO:0005739]; nucleolus [GO:0005730]; nucleus [GO:0005634]; 3'-5' exonuclease activity [GO:0008408]; 3'-5'-exoribonuclease activity [GO:0000175]; nucleic acid binding [GO:0003676]; nucleic acid phosphodiester bond hydrolysis [GO:0090305]; nucleobase-containing compound met…	GO:0000175; GO:0003676; GO:0005634; GO:0005730; GO:0005739; GO:0005758; GO:0005759; GO:0005925; GO:0006139; GO:0008408; GO:0090305	Rexo2	Q9D8S4
-0.522283	15.0055	-7.01539	8.3e-06	0.000517072	3.92068	0.00117229	0.0743584	A-kinase anchor protein SPHKAP (SPHK1-interactor and AKAP domain-containing protein)	SPKAP_MOUSE	SUBCELLULAR LOCATION: Cytoplasm {ECO:0000250}. Note=Colocalizes with SPHK1 in the cytoplasm. {ECO:0000250}.	mitochondrion [GO:0005739]; Z disc [GO:0030018]; protein kinase A binding [GO:0051018]; regulation of protein kinase A signaling [GO:0010738]	GO:0005739; GO:0010738; GO:0030018; GO:0051018	Sphkap	Q6NSW3
-0.35409	16.0503	-6.98717	8.66e-06	0.000530089	3.87791	0.00122611	0.0765204	Immunoglobulin superfamily containing leucine-rich repeat protein 2 (Leucine-rich repeat domain and immunoglobulin domain-containing axon extension protein)	ISLR2_MOUSE	SUBCELLULAR LOCATION: Cell membrane {ECO:0000269|PubMed:19755105}; Single-pass membrane protein {ECO:0000269|PubMed:19755105}.	cell surface [GO:0009986]; integral component of membrane [GO:0016021]; plasma membrane [GO:0005886]; positive regulation of axon extension [GO:0045773]	GO:0005886; GO:0009986; GO:0016021; GO:0045773	Islr2	Q5RKR3
0.420161	15.5024	7.24348	5.9e-06	0.000420533	4.26225	0.0012719	0.078306	Cell surface hyaluronidase (EC 3.2.1.35) (Transmembrane protein 2)	TMEM2_MOUSE	SUBCELLULAR LOCATION: Cell membrane {ECO:0000250|UniProtKB:Q9UHN6}; Single-pass type II membrane protein {ECO:0000250|UniProtKB:Q9UHN6}.	integral component of plasma membrane [GO:0005887]; cadherin binding [GO:0045296]; calcium ion binding [GO:0005509]; hyalurononglucosaminidase activity [GO:0004415]; angiogenesis [GO:0001525]; hyaluronan catabolic process [GO:0030214]; regulation of sprouting angiogenesis [GO:1903670]	GO:0001525; GO:0004415; GO:0005509; GO:0005887; GO:0030214; GO:0045296; GO:1903670	Tmem2	Q5FWI3
-0.543786	14.9122	-6.93709	9.34e-06	0.000557191	3.80173	0.00132725	0.0804012	3-hydroxy-3-methylglutaryl-coenzyme A reductase (HMG-CoA reductase) (EC 1.1.1.34)	HMDH_MOUSE	SUBCELLULAR LOCATION: Endoplasmic reticulum membrane {ECO:0000250}; Multi-pass membrane protein {ECO:0000250}.	endoplasmic reticulum [GO:0005783]; endoplasmic reticulum membrane [GO:0005789]; integral component of membrane [GO:0016021]; peroxisomal membrane [GO:0005778]; coenzyme binding [GO:0050662]; hydroxymethylglutaryl-CoA reductase (NADPH) activity [GO:0004420]; hydroxymethylglutaryl-CoA reductase activity [GO:0042282]; NADPH binding [GO:0070402]; protein homodimerization activity [GO:0042803]; aging…	GO:0004420; GO:0005778; GO:0005783; GO:0005789; GO:0006695; GO:0006743; GO:0007568; GO:0007584; GO:0008299; GO:0008542; GO:0010664; GO:0010666; GO:0015936; GO:0016021; GO:0032874; GO:0042282; GO:0042803; GO:0043407; GO:0045445; GO:0045471; GO:0048643; GO:0048661; GO:0050662; GO:0051262; GO:0061045; GO:0061179; GO:0070374; GO:0070402; GO:0097756	Hmgcr	Q01237
-0.345301	16.2671	-6.92907	9.46e-06	0.000559218	3.78949	0.00134415	0.0810275	Neural cell adhesion molecule L1 (N-CAM-L1) (NCAM-L1) (CD antigen CD171)	L1CAM_MOUSE	SUBCELLULAR LOCATION: Cell membrane {ECO:0000250|UniProtKB:Q05695}; Single-pass type I membrane protein {ECO:0000250|UniProtKB:Q05695}. Cell projection, growth cone {ECO:0000250|UniProtKB:Q05695}. Note=Colocalized with SHTN1 in close apposition with actin filaments in filopodia and lamellipodia of axonalne growth cones of hippocampal neurons. {ECO:0000250|UniProtKB:Q05695}.	axon [GO:0030424]; axonal growth cone [GO:0044295]; cell surface [GO:0009986]; external side of plasma membrane [GO:0009897]; extracellular matrix [GO:0031012]; integral component of membrane [GO:0016021]; membrane [GO:0016020]; neuronal cell body [GO:0043025]; plasma membrane [GO:0005886]; presynaptic membrane [GO:0042734]; terminal bouton [GO:0043195]; identical protein binding [GO:0042802]; in…	GO:0005178; GO:0005886; GO:0007156; GO:0007157; GO:0007159; GO:0007160; GO:0007166; GO:0007411; GO:0009897; GO:0009986; GO:0016020; GO:0016021; GO:0016477; GO:0019904; GO:0022409; GO:0030424; GO:0031012; GO:0031175; GO:0033631; GO:0033691; GO:0034109; GO:0042734; GO:0042802; GO:0043025; GO:0043195; GO:0043621; GO:0044295; GO:0045773; GO:0050808; GO:0050850; GO:0061564	L1cam	P11627
0.423727	15.0894	7.20612	6.23e-06	0.000435535	4.20682	0.0013492	0.0812137	Integral membrane protein 2C (Transmembrane protein BRI3) [Cleaved into: CT-BRI3]	ITM2C_MOUSE	SUBCELLULAR LOCATION: Lysosome membrane {ECO:0000269|PubMed:14592447}; Single-pass type II membrane protein {ECO:0000269|PubMed:14592447}. Cell membrane {ECO:0000250}; Single-pass type II membrane protein {ECO:0000250}.	extracellular exosome [GO:0070062]; Golgi apparatus [GO:0005794]; integral component of membrane [GO:0016021]; lysosomal membrane [GO:0005765]; lysosome [GO:0005764]; perinuclear region of cytoplasm [GO:0048471]; plasma membrane [GO:0005886]; amyloid-beta binding [GO:0001540]; ATP binding [GO:0005524]; negative regulation of amyloid precursor protein biosynthetic process [GO:0042985]; negative re…	GO:0001540; GO:0005524; GO:0005764; GO:0005765; GO:0005794; GO:0005886; GO:0007399; GO:0010977; GO:0016021; GO:0030182; GO:0042985; GO:0048471; GO:0070062; GO:2001238	Itm2c	Q91VK4
0.366817	15.1181	7.17732	6.5e-06	0.000450076	4.16393	0.00141175	0.0834731	Inositol 1,4,5-trisphosphate receptor type 1 (IP3 receptor isoform 1) (IP3R 1) (InsP3R1) (Inositol 1,4,5-trisphosphate-binding protein P400) (Protein PCD-6) (Purkinje cell protein 1) (Type 1 inositol 1,4,5-trisphosphate receptor) (Type 1 InsP3 receptor)	ITPR1_MOUSE	SUBCELLULAR LOCATION: Endoplasmic reticulum membrane {ECO:0000305|PubMed:25368151}; Multi-pass membrane protein {ECO:0000255}. Cytoplasmic vesicle, secretory vesicle membrane {ECO:0000250|UniProtKB:Q9TU34}; Multi-pass membrane protein {ECO:0000255}. Cytoplasm, perinuclear region {ECO:0000250|UniProtKB:Q14643}. Note=Endoplasmic reticulum and secretory granules (By similarity). {ECO:0000250|UniProt…	calcineurin complex [GO:0005955]; cytoplasm [GO:0005737]; endoplasmic reticulum [GO:0005783]; endoplasmic reticulum membrane [GO:0005789]; integral component of membrane [GO:0016021]; nuclear envelope [GO:0005635]; nuclear inner membrane [GO:0005637]; nucleolus [GO:0005730]; perinuclear region of cytoplasm [GO:0048471]; plasma membrane [GO:0005886]; platelet dense granule membrane [GO:0031088]; p…	GO:0001666; GO:0005220; GO:0005509; GO:0005635; GO:0005637; GO:0005730; GO:0005737; GO:0005783; GO:0005789; GO:0005886; GO:0005955; GO:0006816; GO:0009791; GO:0014069; GO:0015278; GO:0016021; GO:0016529; GO:0019855; GO:0030658; GO:0031088; GO:0031094; GO:0032469; GO:0032991; GO:0035091; GO:0042045; GO:0048471; GO:0050849; GO:0050882; GO:0051209; GO:0070059; GO:0070679	Itpr1	P11881
0.616152	13.3738	7.15132	6.76e-06	0.000463249	4.12514	0.00147049	0.0855228	Protein PML	PML_MOUSE	SUBCELLULAR LOCATION: Nucleus {ECO:0000250}. Nucleus, nucleoplasm. Cytoplasm. Nucleus, PML body. Nucleus, nucleolus {ECO:0000250}. Endoplasmic reticulum membrane; Peripheral membrane protein; Cytoplasmic side. Early endosome membrane {ECO:0000250}; Peripheral membrane protein {ECO:0000250}; Cytoplasmic side {ECO:0000250}. Note=Detected in the nucleolus after DNA damage. Acetylation at Lys-497 is …	cytoplasm [GO:0005737]; cytosol [GO:0005829]; early endosome membrane [GO:0031901]; extrinsic component of endoplasmic reticulum membrane [GO:0042406]; nuclear chromosome, telomeric region [GO:0000784]; nuclear matrix [GO:0016363]; nuclear membrane [GO:0031965]; nucleolus [GO:0005730]; nucleoplasm [GO:0005654]; nucleus [GO:0005634]; PML body [GO:0016605]; cobalt ion binding [GO:0050897]; DNA bind…	GO:0000784; GO:0001666; GO:0001932; GO:0002230; GO:0003677; GO:0003713; GO:0005634; GO:0005654; GO:0005730; GO:0005737; GO:0005829; GO:0006351; GO:0006355; GO:0006605; GO:0006606; GO:0006915; GO:0006919; GO:0006977; GO:0007050; GO:0007179; GO:0007182; GO:0007569; GO:0008270; GO:0008285; GO:0008630; GO:0008631; GO:0009411; GO:0010332; GO:0010522; GO:0010761; GO:0016032; GO:0016363; GO:0016525; GO:…	Pml	Q60953
0.402556	15.721	7.10725	7.22e-06	0.000478663	4.05914	0.00157522	0.0890164	L-fucose kinase (Fucokinase) (EC 2.7.1.52)	FUK_MOUSE		ATP binding [GO:0005524]; fucokinase activity [GO:0050201]; carbohydrate phosphorylation [GO:0046835]; GDP-L-fucose salvage [GO:0042352]	GO:0005524; GO:0042352; GO:0046835; GO:0050201	Fuk	Q7TMC8
-0.49263	16.4884	-6.82502	1.11e-05	0.000641596	3.62994	0.00158209	0.0892388	Ras-related protein Rab-9B	RAB9B_MOUSE	SUBCELLULAR LOCATION: Cell membrane {ECO:0000305}; Lipid-anchor {ECO:0000305}; Cytoplasmic side {ECO:0000305}. Cytoplasmic vesicle, phagosome membrane {ECO:0000250}; Lipid-anchor {ECO:0000250}; Cytoplasmic side {ECO:0000250}. Note=Recruited to phagosomes containing S.aureus or Mycobacterium. {ECO:0000250}.	cytosol [GO:0005829]; phagocytic vesicle [GO:0045335]; phagocytic vesicle membrane [GO:0030670]; plasma membrane [GO:0005886]; GDP binding [GO:0019003]; GTP binding [GO:0005525]; GTPase activity [GO:0003924]; identical protein binding [GO:0042802]; protein transport [GO:0015031]; retrograde transport, endosome to Golgi [GO:0042147]	GO:0003924; GO:0005525; GO:0005829; GO:0005886; GO:0015031; GO:0019003; GO:0030670; GO:0042147; GO:0042802; GO:0045335	Rab9b	Q8BHH2
0.512109	15.646	7.09359	7.37e-06	0.000481272	4.03862	0.00160907	0.0901035	Wolframin	WFS1_MOUSE	SUBCELLULAR LOCATION: Endoplasmic reticulum membrane; Multi-pass membrane protein.	dendrite [GO:0030425]; endoplasmic reticulum [GO:0005783]; integral component of endoplasmic reticulum membrane [GO:0030176]; proteasome complex [GO:0000502]; activating transcription factor binding [GO:0033613]; ATPase binding [GO:0051117]; calcium-dependent protein binding [GO:0048306]; calmodulin binding [GO:0005516]; ubiquitin protein ligase binding [GO:0031625]; calcium ion homeostasis [GO:0…	GO:0000122; GO:0000502; GO:0001822; GO:0003091; GO:0005516; GO:0005783; GO:0007601; GO:0007605; GO:0030176; GO:0030425; GO:0030433; GO:0030968; GO:0031016; GO:0031398; GO:0031625; GO:0032469; GO:0033613; GO:0034976; GO:0042048; GO:0042593; GO:0043069; GO:0043433; GO:0043524; GO:0045927; GO:0048306; GO:0050821; GO:0050877; GO:0051117; GO:0051247; GO:0051726; GO:0051928; GO:0055074; GO:1902236; GO:…	Wfs1	P56695
-0.461728	16.0337	-6.80539	1.14e-05	0.000645605	3.59965	0.00163113	0.0908014	Noelin-2 (Olfactomedin-2)	NOE2_MOUSE	SUBCELLULAR LOCATION: Secreted {ECO:0000250|UniProtKB:O95897}. Cell junction, synapse {ECO:0000269|PubMed:25218043, ECO:0000305|PubMed:22632720}. Membrane {ECO:0000269|PubMed:25218043}. Nucleus {ECO:0000250|UniProtKB:O95897}. Cytoplasm {ECO:0000250|UniProtKB:O95897}. Note=Nuclear localization is induced by TGF-beta. {ECO:0000250|UniProtKB:O95897}.	AMPA glutamate receptor complex [GO:0032281]; cell junction [GO:0030054]; cytoplasm [GO:0005737]; extracellular region [GO:0005576]; nucleoplasm [GO:0005654]; nucleus [GO:0005634]; synaptic membrane [GO:0097060]; locomotory behavior [GO:0007626]; positive regulation of smooth muscle cell differentiation [GO:0051152]; protein secretion [GO:0009306]; regulation of vascular smooth muscle cell dediff…	GO:0005576; GO:0005634; GO:0005654; GO:0005737; GO:0007601; GO:0007626; GO:0009306; GO:0030054; GO:0032281; GO:0051152; GO:0097060; GO:1905174	Olfm2	Q8BM13
-0.377167	16.5129	-6.79827	1.16e-05	0.000645605	3.58866	0.00164926	0.0913687	Delta(14)-sterol reductase (Delta-14-SR) (EC 1.3.1.70) (C-14 sterol reductase) (C14SR) (Sterol C14-reductase) (Transmembrane 7 superfamily member 2)	ERG24_MOUSE	SUBCELLULAR LOCATION: Endoplasmic reticulum membrane {ECO:0000250}; Multi-pass membrane protein {ECO:0000250}. Microsome membrane {ECO:0000269|Ref.2}; Multi-pass membrane protein {ECO:0000269|Ref.2}.	endoplasmic reticulum [GO:0005783]; integral component of endoplasmic reticulum membrane [GO:0030176]; intracellular membrane-bounded organelle [GO:0043231]; organelle membrane [GO:0031090]; receptor complex [GO:0043235]; delta14-sterol reductase activity [GO:0050613]; NADP binding [GO:0050661]; oxidoreductase activity, acting on the CH-CH group of donors [GO:0016627]; cholesterol biosynthetic pr…	GO:0005783; GO:0006695; GO:0016126; GO:0016627; GO:0030176; GO:0031090; GO:0043231; GO:0043235; GO:0050613; GO:0050661	Tm7sf2	Q71KT5
-0.462567	16.3898	-6.79453	1.16e-05	0.000645605	3.58288	0.00165885	0.0916669	Diphosphomevalonate decarboxylase (EC 4.1.1.33) (Mevalonate (diphospho)decarboxylase) (MDDase) (Mevalonate pyrophosphate decarboxylase)	MVD1_MOUSE		cytosol [GO:0005829]; ATP binding [GO:0005524]; diphosphomevalonate decarboxylase activity [GO:0004163]; Hsp70 protein binding [GO:0030544]; protein homodimerization activity [GO:0042803]; cholesterol biosynthetic process [GO:0006695]; isopentenyl diphosphate biosynthetic process, mevalonate pathway [GO:0019287]; isoprenoid biosynthetic process [GO:0008299]; positive regulation of cell proliferat…	GO:0004163; GO:0005524; GO:0005829; GO:0006695; GO:0008284; GO:0008299; GO:0019287; GO:0030544; GO:0042803	Mvd	Q99JF5
-0.362963	14.9076	-6.77874	1.19e-05	0.000649738	3.55846	0.00169993	0.0929261	G-protein coupled receptor-associated sorting protein 1 (GASP-1)	GASP1_MOUSE	SUBCELLULAR LOCATION: Cytoplasm {ECO:0000250}.	cytosol [GO:0005829]; endosome to lysosome transport [GO:0008333]; G-protein coupled receptor catabolic process [GO:1990172]	GO:0005829; GO:0008333; GO:1990172	Gprasp1	Q5U4C1
-0.422363	15.2922	-6.77774	1.19e-05	0.000649738	3.55692	0.00170254	0.0930054	Laminin subunit alpha-4 (Laminin-14 subunit alpha) (Laminin-8 subunit alpha) (Laminin-9 subunit alpha)	LAMA4_MOUSE	SUBCELLULAR LOCATION: Secreted, extracellular space, extracellular matrix, basement membrane. Note=Major component.	basal lamina [GO:0005605]; basement membrane [GO:0005604]; extracellular matrix [GO:0031012]; extracellular region [GO:0005576]; extracellular space [GO:0005615]; signaling receptor binding [GO:0005102]; blood vessel development [GO:0001568]; brown fat cell differentiation [GO:0050873]; cell adhesion [GO:0007155]; regulation of cell adhesion [GO:0030155]; regulation of cell migration [GO:0030334]…	GO:0001568; GO:0005102; GO:0005576; GO:0005604; GO:0005605; GO:0005615; GO:0007155; GO:0030155; GO:0030334; GO:0031012; GO:0045995; GO:0050873	Lama4	P97927
0.383414	16.628	7.05061	7.87e-06	0.000508621	3.97391	0.00171993	0.0935296	ATP synthase mitochondrial F1 complex assembly factor 2	ATPF2_MOUSE	SUBCELLULAR LOCATION: Mitochondrion {ECO:0000250}.	cytosol [GO:0005829]; mitochondrion [GO:0005739]; nuclear speck [GO:0016607]; proton-transporting ATP synthase complex assembly [GO:0043461]	GO:0005739; GO:0005829; GO:0016607; GO:0043461	Atpaf2	Q91YY4
-0.409178	15.7528	-6.76309	1.22e-05	0.000651968	3.53423	0.00174156	0.0941751	Transgelin-2 (SM22-beta)	TAGL2_MOUSE		cadherin binding [GO:0045296]; epithelial cell differentiation [GO:0030855]	GO:0030855; GO:0045296	Tagln2	Q9WVA4
-0.50141	13.9447	-6.76149	1.22e-05	0.000651968	3.53175	0.00174585	0.0943025	Protein NOV homolog (NovH) (CCN family member 3) (Nephroblastoma-overexpressed gene protein homolog)	NOV_MOUSE	SUBCELLULAR LOCATION: Secreted {ECO:0000269|PubMed:23705021}. Cytoplasm {ECO:0000250|UniProtKB:P48745}. Cell junction, gap junction {ECO:0000250|UniProtKB:P48745}. Note=Localizes at the Gap junction in presence of GJA1/CX43. {ECO:0000250|UniProtKB:Q9QZQ5}.	axon [GO:0030424]; cytoplasm [GO:0005737]; dendrite [GO:0030425]; extracellular region [GO:0005576]; extracellular space [GO:0005615]; gap junction [GO:0005921]; intracellular membrane-bounded organelle [GO:0043231]; neuronal cell body [GO:0043025]; proteinaceous extracellular matrix [GO:0005578]; growth factor activity [GO:0008083]; heparin binding [GO:0008201]; insulin-like growth factor bindin…	GO:0001525; GO:0002062; GO:0005112; GO:0005178; GO:0005520; GO:0005576; GO:0005578; GO:0005615; GO:0005737; GO:0005921; GO:0007155; GO:0008083; GO:0008201; GO:0010468; GO:0010761; GO:0010832; GO:0014909; GO:0030308; GO:0030424; GO:0030425; GO:0033627; GO:0035767; GO:0043025; GO:0043231; GO:0044342; GO:0045747; GO:0046676; GO:0048659; GO:0050728; GO:0060326; GO:0060392; GO:0060548; GO:0061484; GO:…	Nov	Q64299
-1.01154	15.4503	-6.7227	1.3e-05	0.000680231	3.47151	0.00185337	0.0974	Sodium channel subunit beta-4	SCN4B_MOUSE	SUBCELLULAR LOCATION: Cell membrane {ECO:0000250}; Single-pass type I membrane protein {ECO:0000250}.	intercalated disc [GO:0014704]; intrinsic component of plasma membrane [GO:0031226]; voltage-gated sodium channel complex [GO:0001518]; ion channel binding [GO:0044325]; sodium channel regulator activity [GO:0017080]; voltage-gated ion channel activity [GO:0005244]; voltage-gated sodium channel activity [GO:0005248]; voltage-gated sodium channel activity involved in cardiac muscle cell action pot…	GO:0001518; GO:0005244; GO:0005248; GO:0006814; GO:0010765; GO:0014704; GO:0017080; GO:0031226; GO:0035725; GO:0044325; GO:0060048; GO:0060307; GO:0086002; GO:0086006; GO:0086012; GO:0086016; GO:0086091; GO:2000649	Scn4b	Q7M729
-0.499381	15.2068	-6.71827	1.31e-05	0.000680231	3.46463	0.00186601	0.0977533	E3 ubiquitin-protein ligase PDZRN3 (EC 2.3.2.27) (PDZ domain-containing RING finger protein 3) (RING-type E3 ubiquitin transferase PDZRN3) (Semaphorin cytoplasmic domain-associated protein 3) (Protein SEMACAP3)	PZRN3_MOUSE	SUBCELLULAR LOCATION: Cell junction, synapse {ECO:0000269|PubMed:17576800}. Cytoplasm {ECO:0000250|UniProtKB:E7FDW2}. Note=Localizes to the postsynaptic region of neuromuscular junctions. {ECO:0000269|PubMed:17576800}.	cell junction [GO:0030054]; cytosol [GO:0005829]; neuromuscular junction [GO:0031594]; nucleoplasm [GO:0005654]; nucleus [GO:0005634]; ubiquitin protein ligase activity [GO:0061630]; ubiquitin-protein transferase activity [GO:0004842]; zinc ion binding [GO:0008270]; neuromuscular junction development [GO:0007528]; protein ubiquitination [GO:0016567]	GO:0004842; GO:0005634; GO:0005654; GO:0005829; GO:0007528; GO:0008270; GO:0016567; GO:0030054; GO:0031594; GO:0061630	Pdzrn3	Q69ZS0
0.403741	16.7201	6.9888	8.64e-06	0.000530089	3.88039	0.00189171	0.0984643	Mitochondrial fission 1 protein (FIS1 homolog) (Tetratricopeptide repeat protein 11) (TPR repeat protein 11)	FIS1_MOUSE	SUBCELLULAR LOCATION: Mitochondrion outer membrane; Single-pass membrane protein. Peroxisome membrane {ECO:0000250}; Single-pass membrane protein {ECO:0000250}.	endoplasmic reticulum [GO:0005783]; integral component of mitochondrial outer membrane [GO:0031307]; integral component of peroxisomal membrane [GO:0005779]; mitochondrion [GO:0005739]; peroxisome [GO:0005777]; protein-containing complex [GO:0032991]; signaling receptor binding [GO:0005102]; autophagy of mitochondrion [GO:0000422]; calcium-mediated signaling using intracellular calcium source [GO…	GO:0000266; GO:0000422; GO:0001836; GO:0005102; GO:0005739; GO:0005777; GO:0005779; GO:0005783; GO:0006626; GO:0007204; GO:0008053; GO:0010821; GO:0016559; GO:0031307; GO:0032471; GO:0032991; GO:0035584; GO:0043280; GO:0043653; GO:0051260; GO:0051561; GO:0070584; GO:0090141; GO:0090314; GO:2001244	Fis1	Q9CQ92
-0.517109	15.0122	-6.70239	1.34e-05	0.00069201	3.43989	0.00191205	0.0990208	Copine-8 (Copine VIII)	CPNE8_MOUSE				Cpne8	Q9DC53
0.454863	13.9945	6.97618	8.8e-06	0.000534267	3.86122	0.00192868	0.0994715	Pancreatic progenitor cell differentiation and proliferation factor (Exocrine differentiation and proliferation factor)	PPDPF_MOUSE		cell fate specification [GO:0001708]; exocrine pancreas development [GO:0031017]	GO:0001708; GO:0031017	Ppdpf	Q9CR37

## Sheet: B-Significant proteomics-RNseq
ENSEMBL	UNIPROT	LFC	Pval	Qval	rna.LFC	rna.Pval	rna.Padj	Symbol	Pvals_comb
ENSMUSG00000009418	Q8CH77	-0.410138	5.28e-06	0.0533912	-0.0624641	0.815676	0.897026	Nav1	5.75183e-05		Not significant in RNA-seq
ENSMUSG00000056185	Q80ZJ7	0.491286	1.97e-07	0.00276118	-0.0172242	0.75155	0.85541	Snx32	2.47633e-06
ENSMUSG00000016344	Q9CR37	0.454863	8.8e-06	0.0994715	0.0714268	0.442259	0.629359	Ppdpf	5.23716e-05
ENSMUSG00000024754	Q5FWI3	0.420161	5.9e-06	0.078306	0.0862571	0.277883	0.467534	Tmem2	2.34796e-05
ENSMUSG00000029234	P52875	-0.60775	1.42e-06	0.0182078	0.0720314	0.238591	0.423456	Tmem165	5.38619e-06
ENSMUSG00000046480	Q7M729	-1.01154	1.3e-05	0.0974	-0.24883	0.160764	0.322193	Scn4b	2.94229e-05
ENSMUSG00000026830	Q5EBJ4	-0.761009	5.09e-06	0.0522577	-0.304922	0.113061	0.250995	Ermn	8.84405e-06
ENSMUSG00000024164	P01027	-0.53897	1.36e-07	0.00108395	0.304782	0.0944321	0.220626	C3	2.46202e-07
ENSMUSG00000027419	P21661	-0.619904	3.97e-06	0.0442714	-0.120695	0.0911052	0.214925	Pcsk2	5.72641e-06
ENSMUSG00000032554	Q921I1	-0.515982	1.16e-07	0.000858438	-0.390364	0.0571367	0.152642	Trf	1.31444e-07
ENSMUSG00000006782	P16330	-0.68931	1.27e-06	0.0167731	-0.306584	0.0429833	0.123507	Cnp	9.67502e-07
ENSMUSG00000017167	O54991	-0.646782	1.22e-08	1.36e-05	-0.32564	0.0427657	0.123162	Cntnap1	1.16734e-08
ENSMUSG00000027965	P63056	-0.407364	3.17e-06	0.0372276	-0.157893	0.0418255	0.121138	Olfm3	2.23223e-06
ENSMUSG00000001999	Q9CY64	0.360095	1.83e-06	0.0325171	0.213719	0.0402062	0.117621	Blvra	1.28208e-06
ENSMUSG00000013523	Q80YN3	-0.651284	7.25e-06	0.0676903	-0.201503	0.036764	0.110071	Bcas1	4.30134e-06
ENSMUSG00000074886	O70293	-0.426748	3.06e-06	0.0361921	-0.113827	0.0359947	0.108179	Grk6	1.87481e-06
ENSMUSG00000021477	P06797	-0.695543	1.19e-06	0.0159072	-0.135436	0.0265589	0.0851552	Ctsl	5.77423e-07
ENSMUSG00000028165	Q9CQB5	0.442218	1.84e-06	0.0327538	0.396538	0.0166264	0.0588825	Cisd2	5.59921e-07
ENSMUSG00000031431	Q9Z2S7	-0.345426	8.16e-06	0.0735378	-0.186792	0.0102245	0.0404632	Tsc22d3	1.4433e-06
ENSMUSG00000038305	Q91WJ7	-0.438078	5.05e-06	0.05202	-0.236	0.00881739	0.0361513	Spats2l	7.98257e-07
ENSMUSG00000027848	Q8BK62	-0.554388	6.6e-07	0.00900495	-0.349489	0.00788491	0.033001	Olfml3	1.04465e-07
ENSMUSG00000025855	P12849	-0.396813	4.77e-06	0.0501735	-0.17615	0.00424723	0.0201448	Prkar1b	3.79146e-07
ENSMUSG00000051243	Q5RKR3	-0.35409	8.66e-06	0.0765204	-0.252304	0.00391551	0.0188217	Islr2	6.17118e-07
ENSMUSG00000029769	Q3TVA9	-0.526811	3.46e-06	0.0399128	-0.192149	0.00269759	0.0139157	Ccdc136	1.8191e-07
ENSMUSG00000041773	O35709	-0.399435	2.97e-06	0.035305	-0.23261	0.00190224	0.0104276	Enc1	1.12946e-07
ENSMUSG00000018362	P52293	-0.540276	1.12e-07	0.00081513	-0.546029	0.00165546	0.00929864	Kpna2	4.34021e-09
ENSMUSG00000033405	Q8BG93	0.919503	6.72e-08	0.000594002	0.657692	0.00115092	0.00687752	Nudt15	1.87808e-09
ENSMUSG00000033703	Q7TMC8	0.402556	7.22e-06	0.0890164	0.276873	0.00112658	0.0067663	Fuk	1.59646e-07
ENSMUSG00000072501	Q8CCJ9	0.456807	5.51e-07	0.0109611	0.211779	0.000994278	0.00611149	Phf20l1	1.22307e-08
ENSMUSG00000035357	Q69ZS0	-0.499381	1.31e-05	0.0977533	-0.235277	0.000977463	0.00602852	Pdzrn3	2.45511e-07
ENSMUSG00000025666	Q9JJG6	-0.691317	3.73e-07	0.00429001	-0.206536	0.000842855	0.00534591	Tmem47	7.19325e-09
ENSMUSG00000026544	Q6NT99	0.406523	4.55e-06	0.0651196	0.40788	0.000588119	0.00397569	Dusp23	5.54962e-08
ENSMUSG00000027589	Q8BHD8	0.587282	4.28e-08	0.000255119	0.235446	0.000389073	0.00283933	Pcmtd2	4.29938e-10
ENSMUSG00000074748	Q3UD01	0.476453	5.27e-06	0.0724656	0.17649	0.000382928	0.00280098	Atxn7l3b	4.24213e-08
ENSMUSG00000107283	P19258	0.442142	1.74e-06	0.0310643	0.267094	0.000329558	0.00245864	Mpv17	1.27757e-08
ENSMUSG00000041658	Q6NTA4	-0.389066	5.24e-06	0.0531803	-0.206517	0.000114833	0.00101518	Rragb	1.33771e-08
ENSMUSG00000042709	Q91YY4	0.383414	7.87e-06	0.0935296	0.281163	0.000109692	0.000977502	Atpaf2	1.888e-08
ENSMUSG00000076441	P16460	-0.736848	3.32e-09	4.26e-07	-0.662058	7.048e-05	0.000669755	Ass1	7.03934e-12
ENSMUSG00000030102	P11881	0.366817	6.5e-06	0.0834731	0.372978	4.35247e-05	0.000438752	Itpr1	6.50295e-09
ENSMUSG00000037362	Q64299	-0.50141	1.22e-05	0.0943025	-0.310366	4.13819e-05	0.000421422	Nov	1.13122e-08
ENSMUSG00000019054	Q9CQ92	0.403741	8.64e-06	0.0984643	0.287066	2.53191e-05	0.000277585	Fis1	5.08458e-09
ENSMUSG00000049303	Q920N7	0.980821	4.01e-10	9.23e-10	0.501961	2.4816e-05	0.000272543	Syt12	3.30789e-13
ENSMUSG00000032172	Q8BM13	-0.461728	1.14e-05	0.0908014	-0.26768	2.31463e-05	0.000257044	Olfm2	6.08362e-09
ENSMUSG00000019846	P97927	-0.422363	1.19e-05	0.0930054	-0.41732	1.76985e-05	0.000204073	Lama4	4.90325e-09
ENSMUSG00000036986	Q60953	0.616152	6.76e-06	0.0855228	0.390256	1.09522e-05	0.000134333	Pml	1.80105e-09
ENSMUSG00000028034	Q91WJ8	-0.429811	1.96e-06	0.0240249	-0.2188	8.88427e-06	0.000112548	Fubp1	4.48804e-10
ENSMUSG00000035847	Q08890	-0.450428	2.75e-06	0.0330993	-0.266723	5.68811e-06	7.59794e-05	Ids	4.04839e-10
ENSMUSG00000020150	O35969	-0.637475	4.68e-06	0.0495174	-0.56364	4.42701e-06	6.09876e-05	Gamt	5.30392e-10
ENSMUSG00000025579	P70699	0.469066	1.11e-06	0.0198209	0.490091	2.89193e-06	4.21762e-05	Gaa	8.8163e-11
ENSMUSG00000022055	P08551	-0.73036	5.97e-08	0.000267061	-0.321869	6.95665e-07	1.21187e-05	Nefl	1.3212e-12
ENSMUSG00000028199	P47199	0.420886	2.82e-06	0.0462181	0.430269	4.87171e-07	8.87948e-06	Cryz	3.88976e-11
ENSMUSG00000024799	Q71KT5	-0.377167	1.16e-05	0.0913687	-0.422841	4.80252e-07	8.8043e-06	Vps51	1.49933e-10
ENSMUSG00000043463	Q8BHH2	-0.49263	1.11e-05	0.0892388	-0.409382	4.7263e-07	8.68142e-06	Rab9b	1.41508e-10
ENSMUSG00000024127	Q8C167	-0.601492	1.48e-06	0.0186644	-0.369363	4.43941e-07	8.1998e-06	Prepl	1.90875e-11
ENSMUSG00000032174	Q60625	0.514212	2.72e-06	0.0449705	0.444343	3.84241e-07	7.24804e-06	Icam5	2.98771e-11
ENSMUSG00000020458	Q99P72	-0.474558	1.42e-06	0.0181894	-0.265429	2.70122e-07	5.26348e-06	Rtn4	1.13496e-11
ENSMUSG00000001323	Q9QZX7	0.60563	1.47e-07	0.00179952	0.326543	1.55151e-07	3.18751e-06	Srr	7.3922e-13
ENSMUSG00000030881	Q8K221	0.396737	2.64e-06	0.0439719	0.309902	1.31168e-07	2.75162e-06	Arfip2	1.02817e-11
ENSMUSG00000021662	P97433	-0.431534	7.26e-06	0.0677795	-0.512367	1.21807e-07	2.58102e-06	Arhgef28	2.54276e-11
ENSMUSG00000034825	Q9JJR9	-0.604965	1.12e-06	0.0152075	-0.323058	1.01737e-07	2.19012e-06	Nrip3	3.50985e-12
ENSMUSG00000026547	Q9WVA4	-0.409178	1.22e-05	0.0941751	-0.549796	7.95549e-08	1.7628e-06	Tagln2	2.78174e-11
ENSMUSG00000025731	Q9DCS2	0.848278	1.05e-08	1.72e-05	0.454331	4.59944e-08	1.08532e-06	Mettl26	1.75146e-14
ENSMUSG00000051934	Q8K1N4	0.417841	5.27e-06	0.0725427	0.339429	4.18696e-08	1.00429e-06	Spats2	6.65095e-12
ENSMUSG00000043384	Q5U4C1	-0.362963	1.19e-05	0.0929261	-0.509521	1.07732e-08	3.02563e-07	Gprasp1	3.93388e-12
ENSMUSG00000026792	Q80ZI6	-0.365683	4.34e-06	0.0471117	-0.415624	3.7682e-09	1.18507e-07	Lrsam1	5.355e-13
ENSMUSG00000029119	O54782	0.615188	2.44e-06	0.0414202	0.542828	3.64199e-09	1.15113e-07	Man2b2	2.96401e-13
ENSMUSG00000096199	D3Z4S3	0.627165	5.22e-07	0.0103585	0.520916	2.99436e-09	9.6746e-08	Ptrhd1	5.4851e-14
ENSMUSG00000059970	P17156	0.548741	1.07e-06	0.0193069	0.54583	1.00786e-09	3.55403e-08	Hspa2	3.82441e-14
ENSMUSG00000065979	Q8BFS6	0.518114	7.65e-07	0.0150146	0.440103	7.92318e-10	2.83093e-08	Cpped1	2.18443e-14
ENSMUSG00000022946	Q3UHQ6	-0.492438	3.42e-06	0.03956	-0.445381	6.06817e-10	2.22276e-08	Dopey2	7.2239e-14
ENSMUSG00000031641	Q91VT4	0.434296	1.56e-06	0.0280516	0.5234	6.01547e-10	2.20774e-08	Cbr4	3.34097e-14
ENSMUSG00000039474	P56695	0.512109	7.37e-06	0.0901035	0.562688	4.92567e-10	1.83268e-08	Wfs1	1.24333e-13
ENSMUSG00000001034	Q9WVS8	-0.35103	4.8e-06	0.050354	-0.526292	1.9953e-10	7.95634e-09	Mapk7	3.40783e-14
ENSMUSG00000052560	Q9DC53	-0.517109	1.34e-05	0.0990208	-0.493531	1.85168e-10	7.39927e-09	Cpne8	8.59256e-14
ENSMUSG00000020475	O70250	0.977338	3e-08	0.000130123	0.927259	8.7135e-11	3.77738e-09	Pgam2	1.08445e-16
ENSMUSG00000020277	P12382	0.49086	3.06e-06	0.0487984	0.514285	8.12755e-11	3.57253e-09	Pfkl	9.18468e-15
ENSMUSG00000023019	P13707	0.597879	5.24e-06	0.0721759	0.694067	6.20965e-11	2.80116e-09	Gpd1	1.19291e-14
ENSMUSG00000032026	Q9D8S4	-0.602877	8.27e-06	0.0742244	-0.448362	5.6817e-11	2.5877e-09	Rexo2	1.70537e-14
ENSMUSG00000038301	Q9CWT3	-0.582119	1.72e-06	0.0209358	-0.427534	3.84939e-11	1.8144e-09	Snx10	2.53276e-15
ENSMUSG00000033578	Q9D328	-0.671467	1.64e-06	0.0199475	-0.519898	8.65107e-12	4.61904e-10	Tmem35a	5.6459e-16
ENSMUSG00000042506	Q5DU02	-0.435284	1.6e-06	0.0196997	-0.580939	2.81355e-12	1.66184e-10	Usp22	1.84308e-16
ENSMUSG00000022797	Q62351	-0.461371	6.19e-06	0.0601231	-0.486385	2.53536e-12	1.5117e-10	Tfrc	6.22941e-16
ENSMUSG00000059013	Q9QZS8	-0.585177	2.32e-08	4.97e-05	-0.694961	1.80896e-12	1.12102e-10	Sh2d3c	1.91446e-18
ENSMUSG00000031970	Q9CZ00	-0.48871	7.25e-06	0.0676813	-0.741689	6.99056e-13	4.60378e-11	Dbndd1	2.069e-16
ENSMUSG00000057411	Q501J2	0.73521	1.45e-07	0.00177673	0.499912	4.22647e-13	2.89437e-11	Fam173a	2.77241e-18
ENSMUSG00000034926	Q8VCH6	-0.500236	1.43e-06	0.0182927	-0.420352	8.30936e-14	6.41042e-12	Dhcr24	5.29677e-18
ENSMUSG00000026223	Q91VK4	0.423727	6.23e-06	0.0812137	0.619699	5.4393e-14	4.39351e-12	Itm2c	1.47505e-17
ENSMUSG00000026425	Q91Z67	-0.411369	7.02e-07	0.00964127	-0.526792	4.79308e-14	3.93887e-12	Srgap2	1.54234e-18
ENSMUSG00000052301	Q7TNF0	-0.574533	1.57e-06	0.019445	-0.62466	2.74236e-14	2.44497e-12	Doc2a	1.96296e-18
ENSMUSG00000057147	Q9CQ28	0.68164	2.98e-06	0.0479391	0.599576	2.43362e-14	2.19037e-12	Dph6	3.26859e-18
ENSMUSG00000002343	Q8BNU0	-0.48285	5.48e-06	0.0547148	-0.556674	2.46363e-15	2.51703e-13	Armc6	6.31179e-19
ENSMUSG00000006517	Q99JF5	-0.462567	1.16e-05	0.0916669	-0.725776	5.36364e-16	6.14413e-14	Mvd	2.957e-19
ENSMUSG00000027952	Q9D1G2	-0.61305	2.24e-06	0.0273297	-0.524093	2.92021e-16	3.40709e-14	Pmvk	3.25616e-20
ENSMUSG00000029126	Q62092	-0.761439	1.17e-06	0.0156703	-0.522151	2.10268e-16	2.54762e-14	Nsg1	1.24869e-20
ENSMUSG00000066441	Q9QYF1	-0.492894	4.73e-06	0.0498679	-0.540924	1.89164e-17	2.59087e-15	Rdh11	4.63194e-21
ENSMUSG00000029875	Q8BMK5	-0.746919	1.15e-06	0.01548	-0.787262	1.11476e-17	1.60841e-15	Ccdc184	6.88563e-22
ENSMUSG00000025485	Q3TIR3	-0.480093	5.18e-07	0.00672211	-0.561371	9.98462e-18	1.45169e-15	Ric8a	2.8249e-22
ENSMUSG00000022351	P52019	-0.641493	2.92e-07	0.0029745	-0.535134	2.05122e-18	3.23084e-16	Sqle	3.40055e-23
ENSMUSG00000006711	Q5SZV5	-0.652606	2.44e-08	5.39e-05	-0.641479	7.4545e-20	1.39502e-17	D130043K22Rik	1.13811e-25
ENSMUSG00000021066	Q8BH66	-0.460855	8.34e-07	0.01157	-0.493681	2.61966e-20	5.15772e-18	Atl1	1.31275e-24
ENSMUSG00000028927	Q08642	1.01642	1.04e-07	0.00117444	0.923367	8.83053e-21	1.77559e-18	Padi2	5.80918e-26
ENSMUSG00000022044	P63042	-0.951901	1.2e-08	1.32e-05	-0.839105	1.99597e-21	4.49116e-19	Stmn4	1.6024e-27
ENSMUSG00000020173	Q5NBX1	-0.617119	1.41e-06	0.0181042	-0.708232	8.83055e-23	2.31405e-20	Cobl	8.12472e-27
ENSMUSG00000001467	Q8K0C4	-0.496286	2.19e-06	0.0267707	-0.5653	8.93741e-23	2.31405e-20	Cyp51	1.26834e-26
ENSMUSG00000078185	Q9QZD5	-0.505611	7.97e-06	0.0723802	-0.761146	8.88065e-23	2.31405e-20	Chml	4.49554e-26
ENSMUSG00000021670	Q01237	-0.543786	9.34e-06	0.0804012	-0.490846	2.73109e-23	7.70452e-21	Hmgcr	1.64621e-26
ENSMUSG00000032946	Q9QUG9	-0.624148	5.87e-07	0.00783617	-0.934556	3.13055e-24	1.00289e-21	Rasgrp2	1.27658e-28
ENSMUSG00000027581	O70166	-0.663264	1.11e-06	0.0150808	-0.710738	2.02965e-24	6.93044e-22	Stmn3	1.56048e-28
ENSMUSG00000041263	Q8BG26	-0.669924	2.96e-08	7.22e-05	-0.788716	6.71708e-25	2.53919e-22	Rusc1	1.47122e-30
ENSMUSG00000028051	O88705	-0.55411	5.33e-06	0.0537068	-0.936465	1.38081e-27	6.69199e-25	Hcn3	5.51901e-31
ENSMUSG00000040536	Q8BG18	-0.636858	2.42e-07	0.00230046	-0.74029	6.59709e-29	3.56262e-26	Necab1	1.29512e-33
ENSMUSG00000093930	Q8JZK9	-0.497159	1.99e-07	0.00174491	-0.709857	5.27403e-29	2.93189e-26	Hmgcs1	8.5581e-34
ENSMUSG00000024981	Q8JZR0	-0.549144	1.59e-06	0.0195772	-0.674006	1.09424e-29	7.38651e-27	Acsl5	1.40991e-33
ENSMUSG00000041073	Q5SWP3	-0.512833	5.59e-06	0.0554572	-0.945585	1.96744e-36	1.85933e-33	Nacad	1.04823e-39
ENSMUSG00000028337	Q8C0P5	-0.498651	5.84e-06	0.057397	-0.985091	6.98508e-38	7.76618e-35	Coro2a	4.02239e-41
ENSMUSG00000020396	P19246	-1.10359	2.79e-08	6.64e-05	-1.23348	4.2095e-38	4.97274e-35	Nefh	1.22678e-43
ENSMUSG00000022054	P08553	-0.771656	1.98e-07	0.00173574	-1.02551	6.06208e-44	1.14579e-40	Nefm	1.3917e-48
ENSMUSG00000014846	Q9CRB6	-1.12933	9.55e-10	8.61e-09	-1.29178	2.3782e-44	5.61878e-41	Tppp3	2.77576e-51
ENSMUSG00000027500	P55821	-1.0023	1.82e-07	0.00157763	-1.01971	1.73123e-45	8.18052e-42	Stmn2	3.768e-50
ENSMUSG00000079657	Q504M8	1.48054	1.55e-10	2.2e-11	1.38402	5.85013e-59	5.52866e-55	Rab26	1.42974e-66
ENSMUSG00000021303	P50153	-0.582475	4.31e-07	0.00526966	-1.055	1.01674e-77	1.92173e-73	Gng4	8.45486e-82
ENSMUSG00000104252	O88689	-0.462884	5.25e-06	0.0532113	-0.0192287	0.652967		Pcdha4	4.65653e-05
