# Supplementary material for: HAT cofactor TRRAP modulates microtubule dynamics via SP1 signaling to prevent neurodegeneration
Source: eLife. 2021 Feb 17;10:e61531. doi: 10.7554/eLife.61531 (PMC7939550; doi:10.7554/eLife.61531)
Supplement: Supplementary file 3. — The list includes the results from the TFBS enrichment analysis using the following lists as a template: (A) DEGs in D. (B) First 2940 DEGs from the list in A sorted by adjusted p-value. (C) DEGs 2941 to 5090 from the list in A sorted by adjusted p-value. (D) First 2940 DEGs from the list in B sorted by adjusted p-value. (E) DEGs 2941 to 4741 from the list in B sorted by adjusted p-value. (F) DEGs in E. [file elife-61531-supp3.xlsx]

## Sheet: A-Cortex-striatum
Overlap Results
Collection(s):	TFT
# overlaps shown:	10
# genesets in collections:	615
# genes in comparison (n):	2416
# genes in universe (N):	45956
Gene Set Name	# Genes in Gene Set (K)	Description	# Genes in Overlap (k)	k/K	p-value	FDR q-value			% genes
GGGCGGR_SP1_Q6	2940	Genes having at least one occurence of the highly conserved motif M6 GGGCGGR sites. The motif matches transcription factor binding site V$SP1_Q6 (v7.4 TRANSFAC).	489	0.1663	1.27e-122	7.83e-120	404.93	Sp1	20.2401
CTTTGT_LEF1_Q2	1972	Genes having at least one occurence of the highly conserved motif M13 CTTTGT sites. The motif matches transcription factor binding site V$LEF1_Q2 (v7.4 TRANSFAC).	365	0.1851	1.31e-103	4.01e-101	341.769	TCF1	15.1076
CAGGTG_E12_Q6	2485	Genes having at least one occurence of the highly conserved motif M12 CAGGTG sites. The motif matches transcription factor binding site V$E12_Q6 (v7.4 TRANSFAC).	382	0.1537	1.15e-83	2.36e-81	275.518	TCF3	15.8113
GGGAGGRR_MAZ_Q6	2274	Genes having at least one occurence of the highly conserved motif M24 GGGAGGRR sites. The motif matches transcription factor binding site V$MAZ_Q6 (v7.4 TRANSFAC).	349	0.1535	7.4e-76	1.14e-73	249.579	MAZ	14.4454
TTGTTT_FOXO4_01	2061	Genes having at least one occurence of the highly conserved motif M60 TTGTTT sites. The motif matches transcription factor binding site V$FOXO4_01 (v7.4 TRANSFAC).	311	0.1509	1.68e-65	2.07e-63	215.177	FOXO4	12.8725
GGGTGGRR_PAX4_03	1294	Genes having at least one occurence of the highly conserved motif M56 GGGTGGRR sites. The motif matches transcription factor binding site V$PAX4_03 (v7.4 TRANSFAC).	235	0.1816	4.23e-64	4.33e-62	210.523	PAX4	9.72682
AACTTT_UNKNOWN	1890	Genes having at least one occurence of the highly conserved motif M17 AACTTT in the region spanning up to 4 kb around their transcription start sites. The motif does not match any known transcription factor binding site (v7.4 TRANSFAC).	281	0.1487	1.29e-57	1.13e-55	188.983	Unk.	11.6308
TGGAAA_NFAT_Q4_01	1896	Genes having at least one occurence of the highly conserved motif M55 TGGAAA sites. The motif matches transcription factor binding site V$NFAT_Q4_01 (v7.4 TRANSFAC).	281	0.1482	2.51e-57	1.93e-55	188.022	NFAT	11.6308
CAGCTG_AP4_Q5	1524	Genes having at least one occurence of the highly conserved motif M15 CAGCTG sites. The motif matches transcription factor binding site V$AP4_Q5 (v7.4 TRANSFAC).	239	0.1568	4.92e-53	3.36e-51	173.764	AP4	9.89238
GATTGGY_NFY_Q6_01	1160	Genes having at least one occurence of the highly conserved motif M5 GATTGGY sites. The motif matches transcription factor binding site V$NFY_Q6_01 (v7.4 TRANSFAC).	187	0.1612	3.53e-43	2.17e-41	141.023	NFY	7.74007
Gene/Gene Set Overlap Matrix
Entrez Gene Id	Gene Symbol	Gene Description	GGGCGGR_SP1_Q6	CTTTGT_LEF1_Q2	CAGGTG_E12_Q6	GGGAGGRR_MAZ_Q6	TTGTTT_FOXO4_01	GGGTGGRR_PAX4_03	AACTTT_UNKNOWN	TGGAAA_NFAT_Q4_01	CAGCTG_AP4_Q5	GATTGGY_NFY_Q6_01
10274	STAG1	stromal antigen 1	GGGCGGR_SP1_Q6	CTTTGT_LEF1_Q2	CAGGTG_E12_Q6	GGGAGGRR_MAZ_Q6	TTGTTT_FOXO4_01	GGGTGGRR_PAX4_03	AACTTT_UNKNOWN	TGGAAA_NFAT_Q4_01		GATTGGY_NFY_Q6_01
11337	GABARAP	GABA(A) receptor-associated protein	GGGCGGR_SP1_Q6	CTTTGT_LEF1_Q2	CAGGTG_E12_Q6	GGGAGGRR_MAZ_Q6	TTGTTT_FOXO4_01	GGGTGGRR_PAX4_03	AACTTT_UNKNOWN	TGGAAA_NFAT_Q4_01
9043	SPAG9	sperm associated antigen 9	GGGCGGR_SP1_Q6	CTTTGT_LEF1_Q2	CAGGTG_E12_Q6	GGGAGGRR_MAZ_Q6	TTGTTT_FOXO4_01	GGGTGGRR_PAX4_03	AACTTT_UNKNOWN	TGGAAA_NFAT_Q4_01
5521	PPP2R2B	protein phosphatase 2, regulatory subunit B, beta	GGGCGGR_SP1_Q6	CTTTGT_LEF1_Q2	CAGGTG_E12_Q6	GGGAGGRR_MAZ_Q6	TTGTTT_FOXO4_01	GGGTGGRR_PAX4_03	AACTTT_UNKNOWN
11075	STMN2	stathmin-like 2	GGGCGGR_SP1_Q6	CTTTGT_LEF1_Q2	CAGGTG_E12_Q6	GGGAGGRR_MAZ_Q6	TTGTTT_FOXO4_01	GGGTGGRR_PAX4_03		TGGAAA_NFAT_Q4_01	CAGCTG_AP4_Q5	GATTGGY_NFY_Q6_01
7059	THBS3	thrombospondin 3	GGGCGGR_SP1_Q6	CTTTGT_LEF1_Q2	CAGGTG_E12_Q6	GGGAGGRR_MAZ_Q6	TTGTTT_FOXO4_01	GGGTGGRR_PAX4_03		TGGAAA_NFAT_Q4_01
4580	MTX1	metaxin 1	GGGCGGR_SP1_Q6	CTTTGT_LEF1_Q2	CAGGTG_E12_Q6	GGGAGGRR_MAZ_Q6	TTGTTT_FOXO4_01	GGGTGGRR_PAX4_03		TGGAAA_NFAT_Q4_01
4302	MLLT6	myeloid/lymphoid or mixed-lineage leukemia (trithorax homolog, Drosophila); translocated to, 6	GGGCGGR_SP1_Q6	CTTTGT_LEF1_Q2	CAGGTG_E12_Q6	GGGAGGRR_MAZ_Q6	TTGTTT_FOXO4_01	GGGTGGRR_PAX4_03
54207	KCNK10	potassium channel, subfamily K, member 10	GGGCGGR_SP1_Q6	CTTTGT_LEF1_Q2	CAGGTG_E12_Q6	GGGAGGRR_MAZ_Q6	TTGTTT_FOXO4_01	GGGTGGRR_PAX4_03
55806	HR	hairless homolog (mouse)	GGGCGGR_SP1_Q6	CTTTGT_LEF1_Q2	CAGGTG_E12_Q6	GGGAGGRR_MAZ_Q6	TTGTTT_FOXO4_01	GGGTGGRR_PAX4_03
2115	ETV1	ets variant 1	GGGCGGR_SP1_Q6	CTTTGT_LEF1_Q2	CAGGTG_E12_Q6	GGGAGGRR_MAZ_Q6	TTGTTT_FOXO4_01		AACTTT_UNKNOWN	TGGAAA_NFAT_Q4_01	CAGCTG_AP4_Q5
2118	ETV4	ets variant 4	GGGCGGR_SP1_Q6	CTTTGT_LEF1_Q2	CAGGTG_E12_Q6	GGGAGGRR_MAZ_Q6	TTGTTT_FOXO4_01		AACTTT_UNKNOWN			GATTGGY_NFY_Q6_01
1400	CRMP1	collapsin response mediator protein 1	GGGCGGR_SP1_Q6	CTTTGT_LEF1_Q2	CAGGTG_E12_Q6	GGGAGGRR_MAZ_Q6	TTGTTT_FOXO4_01
2735	GLI1	GLI family zinc finger 1	GGGCGGR_SP1_Q6	CTTTGT_LEF1_Q2	CAGGTG_E12_Q6	GGGAGGRR_MAZ_Q6	TTGTTT_FOXO4_01
1462	VCAN	versican	GGGCGGR_SP1_Q6	CTTTGT_LEF1_Q2	CAGGTG_E12_Q6	GGGAGGRR_MAZ_Q6		GGGTGGRR_PAX4_03	AACTTT_UNKNOWN	TGGAAA_NFAT_Q4_01
124930	ANKRD13B	ankyrin repeat domain 13B	GGGCGGR_SP1_Q6	CTTTGT_LEF1_Q2	CAGGTG_E12_Q6	GGGAGGRR_MAZ_Q6		GGGTGGRR_PAX4_03	AACTTT_UNKNOWN
10602	CDC42EP3	CDC42 effector protein (Rho GTPase binding) 3	GGGCGGR_SP1_Q6	CTTTGT_LEF1_Q2	CAGGTG_E12_Q6	GGGAGGRR_MAZ_Q6		GGGTGGRR_PAX4_03		TGGAAA_NFAT_Q4_01	CAGCTG_AP4_Q5
5916	RARG	retinoic acid receptor, gamma	GGGCGGR_SP1_Q6	CTTTGT_LEF1_Q2	CAGGTG_E12_Q6	GGGAGGRR_MAZ_Q6		GGGTGGRR_PAX4_03		TGGAAA_NFAT_Q4_01
10492	SYNCRIP	synaptotagmin binding, cytoplasmic RNA interacting protein	GGGCGGR_SP1_Q6	CTTTGT_LEF1_Q2	CAGGTG_E12_Q6	GGGAGGRR_MAZ_Q6		GGGTGGRR_PAX4_03		TGGAAA_NFAT_Q4_01
28951	TRIB2	tribbles homolog 2 (Drosophila)	GGGCGGR_SP1_Q6	CTTTGT_LEF1_Q2	CAGGTG_E12_Q6	GGGAGGRR_MAZ_Q6		GGGTGGRR_PAX4_03		TGGAAA_NFAT_Q4_01
7534	YWHAZ	tyrosine 3-monooxygenase/tryptophan 5-monooxygenase activation protein, zeta polypeptide	GGGCGGR_SP1_Q6	CTTTGT_LEF1_Q2	CAGGTG_E12_Q6	GGGAGGRR_MAZ_Q6		GGGTGGRR_PAX4_03			CAGCTG_AP4_Q5	GATTGGY_NFY_Q6_01
57060	PCBP4	poly(rC) binding protein 4	GGGCGGR_SP1_Q6	CTTTGT_LEF1_Q2	CAGGTG_E12_Q6	GGGAGGRR_MAZ_Q6		GGGTGGRR_PAX4_03			CAGCTG_AP4_Q5
9253	NUMBL	numb homolog (Drosophila)-like	GGGCGGR_SP1_Q6	CTTTGT_LEF1_Q2	CAGGTG_E12_Q6	GGGAGGRR_MAZ_Q6		GGGTGGRR_PAX4_03			CAGCTG_AP4_Q5
59274	MESDC1	mesoderm development candidate 1	GGGCGGR_SP1_Q6	CTTTGT_LEF1_Q2	CAGGTG_E12_Q6	GGGAGGRR_MAZ_Q6		GGGTGGRR_PAX4_03			CAGCTG_AP4_Q5
3159	HMGA1	high mobility group AT-hook 1	GGGCGGR_SP1_Q6	CTTTGT_LEF1_Q2	CAGGTG_E12_Q6	GGGAGGRR_MAZ_Q6		GGGTGGRR_PAX4_03				GATTGGY_NFY_Q6_01
4137	MAPT	microtubule-associated protein tau	GGGCGGR_SP1_Q6	CTTTGT_LEF1_Q2	CAGGTG_E12_Q6	GGGAGGRR_MAZ_Q6		GGGTGGRR_PAX4_03
222950	C7orf51	chromosome 7 open reading frame 51	GGGCGGR_SP1_Q6	CTTTGT_LEF1_Q2	CAGGTG_E12_Q6	GGGAGGRR_MAZ_Q6		GGGTGGRR_PAX4_03
1303	COL12A1	collagen, type XII, alpha 1	GGGCGGR_SP1_Q6	CTTTGT_LEF1_Q2	CAGGTG_E12_Q6	GGGAGGRR_MAZ_Q6				TGGAAA_NFAT_Q4_01
5639	PRRG2	proline rich Gla (G-carboxyglutamic acid) 2	GGGCGGR_SP1_Q6	CTTTGT_LEF1_Q2	CAGGTG_E12_Q6	GGGAGGRR_MAZ_Q6					CAGCTG_AP4_Q5
10625	IVNS1ABP	influenza virus NS1A binding protein	GGGCGGR_SP1_Q6	CTTTGT_LEF1_Q2	CAGGTG_E12_Q6	GGGAGGRR_MAZ_Q6						GATTGGY_NFY_Q6_01
9590	AKAP12	A kinase (PRKA) anchor protein 12	GGGCGGR_SP1_Q6	CTTTGT_LEF1_Q2	CAGGTG_E12_Q6	GGGAGGRR_MAZ_Q6
23085	ERC1	ELKS/RAB6-interacting/CAST family member 1	GGGCGGR_SP1_Q6	CTTTGT_LEF1_Q2	CAGGTG_E12_Q6	GGGAGGRR_MAZ_Q6
4208	MEF2C	myocyte enhancer factor 2C	GGGCGGR_SP1_Q6	CTTTGT_LEF1_Q2	CAGGTG_E12_Q6		TTGTTT_FOXO4_01		AACTTT_UNKNOWN	TGGAAA_NFAT_Q4_01	CAGCTG_AP4_Q5
84251	SGIP1	SH3-domain GRB2-like (endophilin) interacting protein 1	GGGCGGR_SP1_Q6	CTTTGT_LEF1_Q2	CAGGTG_E12_Q6		TTGTTT_FOXO4_01			TGGAAA_NFAT_Q4_01	CAGCTG_AP4_Q5	GATTGGY_NFY_Q6_01
284	ANGPT1	angiopoietin 1	GGGCGGR_SP1_Q6	CTTTGT_LEF1_Q2	CAGGTG_E12_Q6		TTGTTT_FOXO4_01			TGGAAA_NFAT_Q4_01	CAGCTG_AP4_Q5
4904	YBX1	Y box binding protein 1	GGGCGGR_SP1_Q6	CTTTGT_LEF1_Q2	CAGGTG_E12_Q6		TTGTTT_FOXO4_01
11143	KAT7	K(lysine) acetyltransferase 7	GGGCGGR_SP1_Q6	CTTTGT_LEF1_Q2	CAGGTG_E12_Q6		TTGTTT_FOXO4_01
6252	RTN1	reticulon 1	GGGCGGR_SP1_Q6	CTTTGT_LEF1_Q2	CAGGTG_E12_Q6		TTGTTT_FOXO4_01
54800	KLHL24	kelch-like 24 (Drosophila)	GGGCGGR_SP1_Q6	CTTTGT_LEF1_Q2	CAGGTG_E12_Q6		TTGTTT_FOXO4_01
8301	PICALM	phosphatidylinositol binding clathrin assembly protein	GGGCGGR_SP1_Q6	CTTTGT_LEF1_Q2	CAGGTG_E12_Q6			GGGTGGRR_PAX4_03	AACTTT_UNKNOWN	TGGAAA_NFAT_Q4_01	CAGCTG_AP4_Q5
81551	STMN4	stathmin-like 4	GGGCGGR_SP1_Q6	CTTTGT_LEF1_Q2	CAGGTG_E12_Q6			GGGTGGRR_PAX4_03	AACTTT_UNKNOWN			GATTGGY_NFY_Q6_01
51621	KLF13	Kruppel-like factor 13	GGGCGGR_SP1_Q6	CTTTGT_LEF1_Q2	CAGGTG_E12_Q6			GGGTGGRR_PAX4_03		TGGAAA_NFAT_Q4_01	CAGCTG_AP4_Q5
139285	FAM123B	family with sequence similarity 123B	GGGCGGR_SP1_Q6	CTTTGT_LEF1_Q2	CAGGTG_E12_Q6			GGGTGGRR_PAX4_03			CAGCTG_AP4_Q5	GATTGGY_NFY_Q6_01
57142	RTN4	reticulon 4	GGGCGGR_SP1_Q6	CTTTGT_LEF1_Q2	CAGGTG_E12_Q6			GGGTGGRR_PAX4_03
23647	ARFIP2	ADP-ribosylation factor interacting protein 2	GGGCGGR_SP1_Q6	CTTTGT_LEF1_Q2	CAGGTG_E12_Q6			GGGTGGRR_PAX4_03
7008	TEF	thyrotrophic embryonic factor	GGGCGGR_SP1_Q6	CTTTGT_LEF1_Q2	CAGGTG_E12_Q6				AACTTT_UNKNOWN		CAGCTG_AP4_Q5	GATTGGY_NFY_Q6_01
51155	HN1	hematological and neurological expressed 1	GGGCGGR_SP1_Q6	CTTTGT_LEF1_Q2	CAGGTG_E12_Q6				AACTTT_UNKNOWN		CAGCTG_AP4_Q5
23033	DOPEY1	dopey family member 1	GGGCGGR_SP1_Q6	CTTTGT_LEF1_Q2	CAGGTG_E12_Q6				AACTTT_UNKNOWN
85508	SCRT2	scratch homolog 2, zinc finger protein (Drosophila)	GGGCGGR_SP1_Q6	CTTTGT_LEF1_Q2	CAGGTG_E12_Q6				AACTTT_UNKNOWN
28969	BZW2	basic leucine zipper and W2 domains 2	GGGCGGR_SP1_Q6	CTTTGT_LEF1_Q2	CAGGTG_E12_Q6					TGGAAA_NFAT_Q4_01
805	CALM2	calmodulin 2 (phosphorylase kinase, delta)	GGGCGGR_SP1_Q6	CTTTGT_LEF1_Q2	CAGGTG_E12_Q6						CAGCTG_AP4_Q5	GATTGGY_NFY_Q6_01
140465	MYL6B	myosin, light chain 6B, alkali, smooth muscle and non-muscle	GGGCGGR_SP1_Q6	CTTTGT_LEF1_Q2	CAGGTG_E12_Q6						CAGCTG_AP4_Q5
2140	EYA3	eyes absent homolog 3 (Drosophila)	GGGCGGR_SP1_Q6	CTTTGT_LEF1_Q2	CAGGTG_E12_Q6						CAGCTG_AP4_Q5
3157	HMGCS1	3-hydroxy-3-methylglutaryl-CoA synthase 1 (soluble)	GGGCGGR_SP1_Q6	CTTTGT_LEF1_Q2	CAGGTG_E12_Q6							GATTGGY_NFY_Q6_01
9929	JOSD1	Josephin domain containing 1	GGGCGGR_SP1_Q6	CTTTGT_LEF1_Q2	CAGGTG_E12_Q6
23240	KIAA0922	KIAA0922	GGGCGGR_SP1_Q6	CTTTGT_LEF1_Q2	CAGGTG_E12_Q6
56890	MDM1	Mdm1 nuclear protein homolog (mouse)	GGGCGGR_SP1_Q6	CTTTGT_LEF1_Q2	CAGGTG_E12_Q6
659	BMPR2	bone morphogenetic protein receptor, type II (serine/threonine kinase)	GGGCGGR_SP1_Q6	CTTTGT_LEF1_Q2		GGGAGGRR_MAZ_Q6	TTGTTT_FOXO4_01	GGGTGGRR_PAX4_03	AACTTT_UNKNOWN	TGGAAA_NFAT_Q4_01	CAGCTG_AP4_Q5
9572	NR1D1	nuclear receptor subfamily 1, group D, member 1	GGGCGGR_SP1_Q6	CTTTGT_LEF1_Q2		GGGAGGRR_MAZ_Q6	TTGTTT_FOXO4_01	GGGTGGRR_PAX4_03	AACTTT_UNKNOWN	TGGAAA_NFAT_Q4_01		GATTGGY_NFY_Q6_01
7157	TP53	tumor protein p53	GGGCGGR_SP1_Q6	CTTTGT_LEF1_Q2		GGGAGGRR_MAZ_Q6	TTGTTT_FOXO4_01	GGGTGGRR_PAX4_03	AACTTT_UNKNOWN	TGGAAA_NFAT_Q4_01
9618	TRAF4	TNF receptor-associated factor 4	GGGCGGR_SP1_Q6	CTTTGT_LEF1_Q2		GGGAGGRR_MAZ_Q6	TTGTTT_FOXO4_01	GGGTGGRR_PAX4_03	AACTTT_UNKNOWN		CAGCTG_AP4_Q5
91851	CHRDL1	chordin-like 1	GGGCGGR_SP1_Q6	CTTTGT_LEF1_Q2		GGGAGGRR_MAZ_Q6	TTGTTT_FOXO4_01	GGGTGGRR_PAX4_03	AACTTT_UNKNOWN
6483	ST3GAL2	ST3 beta-galactoside alpha-2,3-sialyltransferase 2	GGGCGGR_SP1_Q6	CTTTGT_LEF1_Q2		GGGAGGRR_MAZ_Q6	TTGTTT_FOXO4_01	GGGTGGRR_PAX4_03	AACTTT_UNKNOWN
55904	MLL5	myeloid/lymphoid or mixed-lineage leukemia 5 (trithorax homolog, Drosophila)	GGGCGGR_SP1_Q6	CTTTGT_LEF1_Q2		GGGAGGRR_MAZ_Q6	TTGTTT_FOXO4_01	GGGTGGRR_PAX4_03				GATTGGY_NFY_Q6_01
7023	TFAP4	transcription factor AP-4 (activating enhancer binding protein 4)	GGGCGGR_SP1_Q6	CTTTGT_LEF1_Q2		GGGAGGRR_MAZ_Q6	TTGTTT_FOXO4_01		AACTTT_UNKNOWN	TGGAAA_NFAT_Q4_01	CAGCTG_AP4_Q5
26050	SLITRK5	SLIT and NTRK-like family, member 5	GGGCGGR_SP1_Q6	CTTTGT_LEF1_Q2		GGGAGGRR_MAZ_Q6	TTGTTT_FOXO4_01		AACTTT_UNKNOWN	TGGAAA_NFAT_Q4_01	CAGCTG_AP4_Q5
6660	SOX5	SRY (sex determining region Y)-box 5	GGGCGGR_SP1_Q6	CTTTGT_LEF1_Q2		GGGAGGRR_MAZ_Q6	TTGTTT_FOXO4_01		AACTTT_UNKNOWN	TGGAAA_NFAT_Q4_01	CAGCTG_AP4_Q5
4893	NRAS	neuroblastoma RAS viral (v-ras) oncogene homolog	GGGCGGR_SP1_Q6	CTTTGT_LEF1_Q2		GGGAGGRR_MAZ_Q6	TTGTTT_FOXO4_01		AACTTT_UNKNOWN	TGGAAA_NFAT_Q4_01
124540	MSI2	musashi homolog 2 (Drosophila)	GGGCGGR_SP1_Q6	CTTTGT_LEF1_Q2		GGGAGGRR_MAZ_Q6	TTGTTT_FOXO4_01		AACTTT_UNKNOWN
168455	C7orf74	chromosome 7 open reading frame 74	GGGCGGR_SP1_Q6	CTTTGT_LEF1_Q2		GGGAGGRR_MAZ_Q6	TTGTTT_FOXO4_01		AACTTT_UNKNOWN
56884	FSTL5	follistatin-like 5	GGGCGGR_SP1_Q6	CTTTGT_LEF1_Q2		GGGAGGRR_MAZ_Q6	TTGTTT_FOXO4_01			TGGAAA_NFAT_Q4_01
901	CCNG2	cyclin G2	GGGCGGR_SP1_Q6	CTTTGT_LEF1_Q2		GGGAGGRR_MAZ_Q6	TTGTTT_FOXO4_01					GATTGGY_NFY_Q6_01
4082	MARCKS	myristoylated alanine-rich protein kinase C substrate	GGGCGGR_SP1_Q6	CTTTGT_LEF1_Q2		GGGAGGRR_MAZ_Q6	TTGTTT_FOXO4_01					GATTGGY_NFY_Q6_01
3927	LASP1	LIM and SH3 protein 1	GGGCGGR_SP1_Q6	CTTTGT_LEF1_Q2		GGGAGGRR_MAZ_Q6		GGGTGGRR_PAX4_03	AACTTT_UNKNOWN
10971	YWHAQ	tyrosine 3-monooxygenase/tryptophan 5-monooxygenase activation protein, theta polypeptide	GGGCGGR_SP1_Q6	CTTTGT_LEF1_Q2		GGGAGGRR_MAZ_Q6		GGGTGGRR_PAX4_03		TGGAAA_NFAT_Q4_01
1982	EIF4G2	eukaryotic translation initiation factor 4 gamma, 2	GGGCGGR_SP1_Q6	CTTTGT_LEF1_Q2		GGGAGGRR_MAZ_Q6		GGGTGGRR_PAX4_03			CAGCTG_AP4_Q5	GATTGGY_NFY_Q6_01
60468	BACH2	BTB and CNC homology 1, basic leucine zipper transcription factor 2	GGGCGGR_SP1_Q6	CTTTGT_LEF1_Q2		GGGAGGRR_MAZ_Q6		GGGTGGRR_PAX4_03			CAGCTG_AP4_Q5
7532	YWHAG	tyrosine 3-monooxygenase/tryptophan 5-monooxygenase activation protein, gamma polypeptide	GGGCGGR_SP1_Q6	CTTTGT_LEF1_Q2		GGGAGGRR_MAZ_Q6		GGGTGGRR_PAX4_03
1937	EEF1G	eukaryotic translation elongation factor 1 gamma	GGGCGGR_SP1_Q6	CTTTGT_LEF1_Q2		GGGAGGRR_MAZ_Q6		GGGTGGRR_PAX4_03
3005	H1F0	H1 histone family, member 0	GGGCGGR_SP1_Q6	CTTTGT_LEF1_Q2		GGGAGGRR_MAZ_Q6			AACTTT_UNKNOWN	TGGAAA_NFAT_Q4_01	CAGCTG_AP4_Q5
7476	WNT7A	wingless-type MMTV integration site family, member 7A	GGGCGGR_SP1_Q6	CTTTGT_LEF1_Q2		GGGAGGRR_MAZ_Q6			AACTTT_UNKNOWN
9987	HNRPDL	heterogeneous nuclear ribonucleoprotein D-like	GGGCGGR_SP1_Q6	CTTTGT_LEF1_Q2		GGGAGGRR_MAZ_Q6					CAGCTG_AP4_Q5
1655	DDX5	DEAD (Asp-Glu-Ala-Asp) box polypeptide 5	GGGCGGR_SP1_Q6	CTTTGT_LEF1_Q2		GGGAGGRR_MAZ_Q6					CAGCTG_AP4_Q5
51070	NOSIP	nitric oxide synthase interacting protein	GGGCGGR_SP1_Q6	CTTTGT_LEF1_Q2		GGGAGGRR_MAZ_Q6					CAGCTG_AP4_Q5
83461	CDCA3	cell division cycle associated 3	GGGCGGR_SP1_Q6	CTTTGT_LEF1_Q2		GGGAGGRR_MAZ_Q6					CAGCTG_AP4_Q5
6253	RTN2	reticulon 2	GGGCGGR_SP1_Q6	CTTTGT_LEF1_Q2		GGGAGGRR_MAZ_Q6					CAGCTG_AP4_Q5
5833	PCYT2	phosphate cytidylyltransferase 2, ethanolamine	GGGCGGR_SP1_Q6	CTTTGT_LEF1_Q2		GGGAGGRR_MAZ_Q6						GATTGGY_NFY_Q6_01
57048	PLSCR3	phospholipid scramblase 3	GGGCGGR_SP1_Q6	CTTTGT_LEF1_Q2		GGGAGGRR_MAZ_Q6
57805	KIAA1967	KIAA1967	GGGCGGR_SP1_Q6	CTTTGT_LEF1_Q2		GGGAGGRR_MAZ_Q6
84929	FIBCD1	fibrinogen C domain containing 1	GGGCGGR_SP1_Q6	CTTTGT_LEF1_Q2		GGGAGGRR_MAZ_Q6
2913	GRM3	glutamate receptor, metabotropic 3	GGGCGGR_SP1_Q6	CTTTGT_LEF1_Q2			TTGTTT_FOXO4_01	GGGTGGRR_PAX4_03	AACTTT_UNKNOWN	TGGAAA_NFAT_Q4_01
5396	PRRX1	paired related homeobox 1	GGGCGGR_SP1_Q6	CTTTGT_LEF1_Q2			TTGTTT_FOXO4_01	GGGTGGRR_PAX4_03	AACTTT_UNKNOWN	TGGAAA_NFAT_Q4_01
8609	KLF7	Kruppel-like factor 7 (ubiquitous)	GGGCGGR_SP1_Q6	CTTTGT_LEF1_Q2			TTGTTT_FOXO4_01	GGGTGGRR_PAX4_03		TGGAAA_NFAT_Q4_01
5571	PRKAG1	protein kinase, AMP-activated, gamma 1 non-catalytic subunit	GGGCGGR_SP1_Q6	CTTTGT_LEF1_Q2			TTGTTT_FOXO4_01	GGGTGGRR_PAX4_03
5782	PTPN12	protein tyrosine phosphatase, non-receptor type 12	GGGCGGR_SP1_Q6	CTTTGT_LEF1_Q2			TTGTTT_FOXO4_01	GGGTGGRR_PAX4_03
257106	ARHGAP30	Rho GTPase activating protein 30	GGGCGGR_SP1_Q6	CTTTGT_LEF1_Q2			TTGTTT_FOXO4_01	GGGTGGRR_PAX4_03
9467	SH3BP5	SH3-domain binding protein 5 (BTK-associated)	GGGCGGR_SP1_Q6	CTTTGT_LEF1_Q2			TTGTTT_FOXO4_01		AACTTT_UNKNOWN
7846	TUBA1A	tubulin, alpha 1a	GGGCGGR_SP1_Q6	CTTTGT_LEF1_Q2			TTGTTT_FOXO4_01			TGGAAA_NFAT_Q4_01	CAGCTG_AP4_Q5	GATTGGY_NFY_Q6_01
3925	STMN1	stathmin 1	GGGCGGR_SP1_Q6	CTTTGT_LEF1_Q2			TTGTTT_FOXO4_01			TGGAAA_NFAT_Q4_01		GATTGGY_NFY_Q6_01
128077	LIX1L	Lix1 homolog (mouse)-like	GGGCGGR_SP1_Q6	CTTTGT_LEF1_Q2			TTGTTT_FOXO4_01			TGGAAA_NFAT_Q4_01		GATTGGY_NFY_Q6_01
2742	GLRA2	glycine receptor, alpha 2	GGGCGGR_SP1_Q6	CTTTGT_LEF1_Q2			TTGTTT_FOXO4_01			TGGAAA_NFAT_Q4_01
972	CD74	CD74 molecule, major histocompatibility complex, class II invariant chain	GGGCGGR_SP1_Q6	CTTTGT_LEF1_Q2			TTGTTT_FOXO4_01			TGGAAA_NFAT_Q4_01
65010	SLC26A6	solute carrier family 26, member 6	GGGCGGR_SP1_Q6	CTTTGT_LEF1_Q2			TTGTTT_FOXO4_01					GATTGGY_NFY_Q6_01
159	ADSS	adenylosuccinate synthase	GGGCGGR_SP1_Q6	CTTTGT_LEF1_Q2			TTGTTT_FOXO4_01
5209	PFKFB3	6-phosphofructo-2-kinase/fructose-2,6-biphosphatase 3	GGGCGGR_SP1_Q6	CTTTGT_LEF1_Q2			TTGTTT_FOXO4_01
8906	AP1G2	adaptor-related protein complex 1, gamma 2 subunit	GGGCGGR_SP1_Q6	CTTTGT_LEF1_Q2			TTGTTT_FOXO4_01
1073	CFL2	cofilin 2 (muscle)	GGGCGGR_SP1_Q6	CTTTGT_LEF1_Q2			TTGTTT_FOXO4_01
84542	KIAA1841	KIAA1841	GGGCGGR_SP1_Q6	CTTTGT_LEF1_Q2			TTGTTT_FOXO4_01
9646	CTR9	Ctr9, Paf1/RNA polymerase II complex component, homolog (S. cerevisiae)	GGGCGGR_SP1_Q6	CTTTGT_LEF1_Q2			TTGTTT_FOXO4_01
9643	MORF4L2	mortality factor 4 like 2	GGGCGGR_SP1_Q6	CTTTGT_LEF1_Q2				GGGTGGRR_PAX4_03	AACTTT_UNKNOWN	TGGAAA_NFAT_Q4_01
4355	MPP2	membrane protein, palmitoylated 2 (MAGUK p55 subfamily member 2)	GGGCGGR_SP1_Q6	CTTTGT_LEF1_Q2				GGGTGGRR_PAX4_03	AACTTT_UNKNOWN
1808	DPYSL2	dihydropyrimidinase-like 2	GGGCGGR_SP1_Q6	CTTTGT_LEF1_Q2				GGGTGGRR_PAX4_03		TGGAAA_NFAT_Q4_01		GATTGGY_NFY_Q6_01
56882	CDC42SE1	CDC42 small effector 1	GGGCGGR_SP1_Q6	CTTTGT_LEF1_Q2				GGGTGGRR_PAX4_03			CAGCTG_AP4_Q5
4947	OAZ2	ornithine decarboxylase antizyme 2	GGGCGGR_SP1_Q6	CTTTGT_LEF1_Q2				GGGTGGRR_PAX4_03
399664	MEX3D	mex-3 homolog D (C. elegans)	GGGCGGR_SP1_Q6	CTTTGT_LEF1_Q2				GGGTGGRR_PAX4_03
8193	DPF1	D4, zinc and double PHD fingers family 1	GGGCGGR_SP1_Q6	CTTTGT_LEF1_Q2				GGGTGGRR_PAX4_03
10808	HSPH1	heat shock 105kDa/110kDa protein 1	GGGCGGR_SP1_Q6	CTTTGT_LEF1_Q2					AACTTT_UNKNOWN	TGGAAA_NFAT_Q4_01
10577	NPC2	Niemann-Pick disease, type C2	GGGCGGR_SP1_Q6	CTTTGT_LEF1_Q2					AACTTT_UNKNOWN
55771	PRR11	proline rich 11	GGGCGGR_SP1_Q6	CTTTGT_LEF1_Q2						TGGAAA_NFAT_Q4_01	CAGCTG_AP4_Q5	GATTGGY_NFY_Q6_01
1181	CLCN2	chloride channel 2	GGGCGGR_SP1_Q6	CTTTGT_LEF1_Q2						TGGAAA_NFAT_Q4_01
29896	TRA2A	transformer 2 alpha homolog (Drosophila)	GGGCGGR_SP1_Q6	CTTTGT_LEF1_Q2						TGGAAA_NFAT_Q4_01
124936	CYB5D2	cytochrome b5 domain containing 2	GGGCGGR_SP1_Q6	CTTTGT_LEF1_Q2						TGGAAA_NFAT_Q4_01
55088	C10orf118	chromosome 10 open reading frame 118	GGGCGGR_SP1_Q6	CTTTGT_LEF1_Q2							CAGCTG_AP4_Q5	GATTGGY_NFY_Q6_01
10962	MLLT11	myeloid/lymphoid or mixed-lineage leukemia (trithorax homolog, Drosophila); translocated to, 11	GGGCGGR_SP1_Q6	CTTTGT_LEF1_Q2							CAGCTG_AP4_Q5
65055	REEP1	receptor accessory protein 1	GGGCGGR_SP1_Q6	CTTTGT_LEF1_Q2							CAGCTG_AP4_Q5
219654	ZCCHC24	zinc finger, CCHC domain containing 24	GGGCGGR_SP1_Q6	CTTTGT_LEF1_Q2							CAGCTG_AP4_Q5
129685	TAF8	TAF8 RNA polymerase II, TATA box binding protein (TBP)-associated factor, 43kDa	GGGCGGR_SP1_Q6	CTTTGT_LEF1_Q2								GATTGGY_NFY_Q6_01
7024	TFCP2	transcription factor CP2	GGGCGGR_SP1_Q6	CTTTGT_LEF1_Q2								GATTGGY_NFY_Q6_01
81796	SLCO5A1	solute carrier organic anion transporter family, member 5A1	GGGCGGR_SP1_Q6	CTTTGT_LEF1_Q2
8851	CDK5R1	cyclin-dependent kinase 5, regulatory subunit 1 (p35)	GGGCGGR_SP1_Q6	CTTTGT_LEF1_Q2
11325	DDX42	DEAD (Asp-Glu-Ala-Asp) box polypeptide 42	GGGCGGR_SP1_Q6	CTTTGT_LEF1_Q2
2975	GTF3C1	general transcription factor IIIC, polypeptide 1, alpha 220kDa	GGGCGGR_SP1_Q6	CTTTGT_LEF1_Q2
124222	PAQR4	progestin and adipoQ receptor family member IV	GGGCGGR_SP1_Q6	CTTTGT_LEF1_Q2
7296	TXNRD1	thioredoxin reductase 1	GGGCGGR_SP1_Q6	CTTTGT_LEF1_Q2
3182	HNRNPAB	heterogeneous nuclear ribonucleoprotein A/B	GGGCGGR_SP1_Q6	CTTTGT_LEF1_Q2
84002	B3GNT5	UDP-GlcNAc:betaGal beta-1,3-N-acetylglucosaminyltransferase 5	GGGCGGR_SP1_Q6	CTTTGT_LEF1_Q2
89958	C9orf140	chromosome 9 open reading frame 140	GGGCGGR_SP1_Q6	CTTTGT_LEF1_Q2
11182	SLC2A6	solute carrier family 2 (facilitated glucose transporter), member 6	GGGCGGR_SP1_Q6	CTTTGT_LEF1_Q2
50861	STMN3	stathmin-like 3	GGGCGGR_SP1_Q6	CTTTGT_LEF1_Q2
51101	FAM164A	family with sequence similarity 164, member A	GGGCGGR_SP1_Q6	CTTTGT_LEF1_Q2
5155	PDGFB	platelet-derived growth factor beta polypeptide	GGGCGGR_SP1_Q6		CAGGTG_E12_Q6	GGGAGGRR_MAZ_Q6	TTGTTT_FOXO4_01	GGGTGGRR_PAX4_03	AACTTT_UNKNOWN	TGGAAA_NFAT_Q4_01	CAGCTG_AP4_Q5
139411	PTCHD1	patched domain containing 1	GGGCGGR_SP1_Q6		CAGGTG_E12_Q6	GGGAGGRR_MAZ_Q6	TTGTTT_FOXO4_01	GGGTGGRR_PAX4_03	AACTTT_UNKNOWN	TGGAAA_NFAT_Q4_01	CAGCTG_AP4_Q5
145581	LRFN5	leucine rich repeat and fibronectin type III domain containing 5	GGGCGGR_SP1_Q6		CAGGTG_E12_Q6	GGGAGGRR_MAZ_Q6	TTGTTT_FOXO4_01	GGGTGGRR_PAX4_03			CAGCTG_AP4_Q5
7067	THRA	thyroid hormone receptor, alpha	GGGCGGR_SP1_Q6		CAGGTG_E12_Q6	GGGAGGRR_MAZ_Q6	TTGTTT_FOXO4_01	GGGTGGRR_PAX4_03
11151	CORO1A	coronin, actin binding protein, 1A	GGGCGGR_SP1_Q6		CAGGTG_E12_Q6	GGGAGGRR_MAZ_Q6	TTGTTT_FOXO4_01	GGGTGGRR_PAX4_03
182	JAG1	jagged 1	GGGCGGR_SP1_Q6		CAGGTG_E12_Q6	GGGAGGRR_MAZ_Q6	TTGTTT_FOXO4_01		AACTTT_UNKNOWN	TGGAAA_NFAT_Q4_01	CAGCTG_AP4_Q5
5187	PER1	period homolog 1 (Drosophila)	GGGCGGR_SP1_Q6		CAGGTG_E12_Q6	GGGAGGRR_MAZ_Q6	TTGTTT_FOXO4_01
81846	SBF2	SET binding factor 2	GGGCGGR_SP1_Q6		CAGGTG_E12_Q6	GGGAGGRR_MAZ_Q6		GGGTGGRR_PAX4_03		TGGAAA_NFAT_Q4_01
10235	RASGRP2	RAS guanyl releasing protein 2 (calcium and DAG-regulated)	GGGCGGR_SP1_Q6		CAGGTG_E12_Q6	GGGAGGRR_MAZ_Q6		GGGTGGRR_PAX4_03
10044	SH2D3C	SH2 domain containing 3C	GGGCGGR_SP1_Q6		CAGGTG_E12_Q6	GGGAGGRR_MAZ_Q6		GGGTGGRR_PAX4_03
388324	INCA1	inhibitor of CDK, cyclin A1 interacting protein 1	GGGCGGR_SP1_Q6		CAGGTG_E12_Q6	GGGAGGRR_MAZ_Q6		GGGTGGRR_PAX4_03
23564	DDAH2	dimethylarginine dimethylaminohydrolase 2	GGGCGGR_SP1_Q6		CAGGTG_E12_Q6	GGGAGGRR_MAZ_Q6		GGGTGGRR_PAX4_03
92799	SHKBP1	SH3KBP1 binding protein 1	GGGCGGR_SP1_Q6		CAGGTG_E12_Q6	GGGAGGRR_MAZ_Q6		GGGTGGRR_PAX4_03
64221	ROBO3	roundabout, axon guidance receptor, homolog 3 (Drosophila)	GGGCGGR_SP1_Q6		CAGGTG_E12_Q6	GGGAGGRR_MAZ_Q6		GGGTGGRR_PAX4_03
90933	TRIM41	tripartite motif containing 41	GGGCGGR_SP1_Q6		CAGGTG_E12_Q6	GGGAGGRR_MAZ_Q6		GGGTGGRR_PAX4_03
9132	KCNQ4	potassium voltage-gated channel, KQT-like subfamily, member 4	GGGCGGR_SP1_Q6		CAGGTG_E12_Q6	GGGAGGRR_MAZ_Q6			AACTTT_UNKNOWN	TGGAAA_NFAT_Q4_01	CAGCTG_AP4_Q5
8492	PRSS12	protease, serine, 12 (neurotrypsin, motopsin)	GGGCGGR_SP1_Q6		CAGGTG_E12_Q6	GGGAGGRR_MAZ_Q6			AACTTT_UNKNOWN	TGGAAA_NFAT_Q4_01
11255	HRH3	histamine receptor H3	GGGCGGR_SP1_Q6		CAGGTG_E12_Q6	GGGAGGRR_MAZ_Q6			AACTTT_UNKNOWN
51566	ARMCX3	armadillo repeat containing, X-linked 3	GGGCGGR_SP1_Q6		CAGGTG_E12_Q6	GGGAGGRR_MAZ_Q6			AACTTT_UNKNOWN
63976	PRDM16	PR domain containing 16	GGGCGGR_SP1_Q6		CAGGTG_E12_Q6	GGGAGGRR_MAZ_Q6			AACTTT_UNKNOWN
1871	E2F3	E2F transcription factor 3	GGGCGGR_SP1_Q6		CAGGTG_E12_Q6	GGGAGGRR_MAZ_Q6				TGGAAA_NFAT_Q4_01	CAGCTG_AP4_Q5
80179	MYO19	myosin XIX	GGGCGGR_SP1_Q6		CAGGTG_E12_Q6	GGGAGGRR_MAZ_Q6				TGGAAA_NFAT_Q4_01
3911	LAMA5	laminin, alpha 5	GGGCGGR_SP1_Q6		CAGGTG_E12_Q6	GGGAGGRR_MAZ_Q6					CAGCTG_AP4_Q5
114884	OSBPL10	oxysterol binding protein-like 10	GGGCGGR_SP1_Q6		CAGGTG_E12_Q6	GGGAGGRR_MAZ_Q6					CAGCTG_AP4_Q5
8841	HDAC3	histone deacetylase 3	GGGCGGR_SP1_Q6		CAGGTG_E12_Q6	GGGAGGRR_MAZ_Q6
129285	PPP1R21	protein phosphatase 1, regulatory subunit 21	GGGCGGR_SP1_Q6		CAGGTG_E12_Q6	GGGAGGRR_MAZ_Q6
266743	NPAS4	neuronal PAS domain protein 4	GGGCGGR_SP1_Q6		CAGGTG_E12_Q6	GGGAGGRR_MAZ_Q6
246330	PELI3	pellino homolog 3 (Drosophila)	GGGCGGR_SP1_Q6		CAGGTG_E12_Q6	GGGAGGRR_MAZ_Q6
283375	SLC39A5	solute carrier family 39 (metal ion transporter), member 5	GGGCGGR_SP1_Q6		CAGGTG_E12_Q6	GGGAGGRR_MAZ_Q6
28999	KLF15	Kruppel-like factor 15	GGGCGGR_SP1_Q6		CAGGTG_E12_Q6	GGGAGGRR_MAZ_Q6
6738	TROVE2	TROVE domain family, member 2	GGGCGGR_SP1_Q6		CAGGTG_E12_Q6	GGGAGGRR_MAZ_Q6
11040	PIM2	pim-2 oncogene	GGGCGGR_SP1_Q6		CAGGTG_E12_Q6		TTGTTT_FOXO4_01	GGGTGGRR_PAX4_03		TGGAAA_NFAT_Q4_01		GATTGGY_NFY_Q6_01
116372	LYPD1	LY6/PLAUR domain containing 1	GGGCGGR_SP1_Q6		CAGGTG_E12_Q6		TTGTTT_FOXO4_01	GGGTGGRR_PAX4_03
2257	FGF12	fibroblast growth factor 12	GGGCGGR_SP1_Q6		CAGGTG_E12_Q6		TTGTTT_FOXO4_01		AACTTT_UNKNOWN	TGGAAA_NFAT_Q4_01	CAGCTG_AP4_Q5	GATTGGY_NFY_Q6_01
81688	C6orf62	chromosome 6 open reading frame 62	GGGCGGR_SP1_Q6		CAGGTG_E12_Q6		TTGTTT_FOXO4_01		AACTTT_UNKNOWN	TGGAAA_NFAT_Q4_01	CAGCTG_AP4_Q5
23500	DAAM2	dishevelled associated activator of morphogenesis 2	GGGCGGR_SP1_Q6		CAGGTG_E12_Q6		TTGTTT_FOXO4_01		AACTTT_UNKNOWN	TGGAAA_NFAT_Q4_01
1031	CDKN2C	cyclin-dependent kinase inhibitor 2C (p18, inhibits CDK4)	GGGCGGR_SP1_Q6		CAGGTG_E12_Q6		TTGTTT_FOXO4_01				CAGCTG_AP4_Q5
1017	CDK2	cyclin-dependent kinase 2	GGGCGGR_SP1_Q6		CAGGTG_E12_Q6		TTGTTT_FOXO4_01				CAGCTG_AP4_Q5
22885	ABLIM3	actin binding LIM protein family, member 3	GGGCGGR_SP1_Q6		CAGGTG_E12_Q6		TTGTTT_FOXO4_01
9788	MTSS1	metastasis suppressor 1	GGGCGGR_SP1_Q6		CAGGTG_E12_Q6			GGGTGGRR_PAX4_03	AACTTT_UNKNOWN	TGGAAA_NFAT_Q4_01	CAGCTG_AP4_Q5
6197	RPS6KA3	ribosomal protein S6 kinase, 90kDa, polypeptide 3	GGGCGGR_SP1_Q6		CAGGTG_E12_Q6			GGGTGGRR_PAX4_03	AACTTT_UNKNOWN	TGGAAA_NFAT_Q4_01
23092	ARHGAP26	Rho GTPase activating protein 26	GGGCGGR_SP1_Q6		CAGGTG_E12_Q6			GGGTGGRR_PAX4_03				GATTGGY_NFY_Q6_01
8531	CSDA	cold shock domain protein A	GGGCGGR_SP1_Q6		CAGGTG_E12_Q6			GGGTGGRR_PAX4_03
8826	IQGAP1	IQ motif containing GTPase activating protein 1	GGGCGGR_SP1_Q6		CAGGTG_E12_Q6			GGGTGGRR_PAX4_03
57198	ATP8B2	ATPase, class I, type 8B, member 2	GGGCGGR_SP1_Q6		CAGGTG_E12_Q6			GGGTGGRR_PAX4_03
2027	ENO3	enolase 3 (beta, muscle)	GGGCGGR_SP1_Q6		CAGGTG_E12_Q6				AACTTT_UNKNOWN		CAGCTG_AP4_Q5
3788	KCNS2	potassium voltage-gated channel, delayed-rectifier, subfamily S, member 2	GGGCGGR_SP1_Q6		CAGGTG_E12_Q6				AACTTT_UNKNOWN		CAGCTG_AP4_Q5
2710	GK	glycerol kinase	GGGCGGR_SP1_Q6		CAGGTG_E12_Q6				AACTTT_UNKNOWN
2560	GABRB1	gamma-aminobutyric acid (GABA) A receptor, beta 1	GGGCGGR_SP1_Q6		CAGGTG_E12_Q6				AACTTT_UNKNOWN
5520	PPP2R2A	protein phosphatase 2, regulatory subunit B, alpha	GGGCGGR_SP1_Q6		CAGGTG_E12_Q6				AACTTT_UNKNOWN
6830	SUPT6H	suppressor of Ty 6 homolog (S. cerevisiae)	GGGCGGR_SP1_Q6		CAGGTG_E12_Q6				AACTTT_UNKNOWN
6388	SDF2	stromal cell-derived factor 2	GGGCGGR_SP1_Q6		CAGGTG_E12_Q6				AACTTT_UNKNOWN
10550	ARL6IP5	ADP-ribosylation-like factor 6 interacting protein 5	GGGCGGR_SP1_Q6		CAGGTG_E12_Q6					TGGAAA_NFAT_Q4_01	CAGCTG_AP4_Q5
4900	NRGN	neurogranin (protein kinase C substrate, RC3)	GGGCGGR_SP1_Q6		CAGGTG_E12_Q6					TGGAAA_NFAT_Q4_01		GATTGGY_NFY_Q6_01
29929	ALG6	asparagine-linked glycosylation 6, alpha-1,3-glucosyltransferase homolog (S. cerevisiae)	GGGCGGR_SP1_Q6		CAGGTG_E12_Q6					TGGAAA_NFAT_Q4_01
6810	STX4	syntaxin 4	GGGCGGR_SP1_Q6		CAGGTG_E12_Q6					TGGAAA_NFAT_Q4_01
8862	APLN	apelin	GGGCGGR_SP1_Q6		CAGGTG_E12_Q6						CAGCTG_AP4_Q5
26580	BSCL2	Berardinelli-Seip congenital lipodystrophy 2 (seipin)	GGGCGGR_SP1_Q6		CAGGTG_E12_Q6						CAGCTG_AP4_Q5
2785	GNG3	guanine nucleotide binding protein (G protein), gamma 3	GGGCGGR_SP1_Q6		CAGGTG_E12_Q6						CAGCTG_AP4_Q5
928	CD9	CD9 molecule	GGGCGGR_SP1_Q6		CAGGTG_E12_Q6						CAGCTG_AP4_Q5
57103	C12orf5	chromosome 12 open reading frame 5	GGGCGGR_SP1_Q6		CAGGTG_E12_Q6							GATTGGY_NFY_Q6_01
3993	LLGL2	lethal giant larvae homolog 2 (Drosophila)	GGGCGGR_SP1_Q6		CAGGTG_E12_Q6							GATTGGY_NFY_Q6_01
5429	POLH	polymerase (DNA directed), eta	GGGCGGR_SP1_Q6		CAGGTG_E12_Q6
8407	TAGLN2	transgelin 2	GGGCGGR_SP1_Q6		CAGGTG_E12_Q6
10733	PLK4	polo-like kinase 4	GGGCGGR_SP1_Q6		CAGGTG_E12_Q6
23310	NCAPD3	non-SMC condensin II complex, subunit D3	GGGCGGR_SP1_Q6		CAGGTG_E12_Q6
84446	BRSK1	BR serine/threonine kinase 1	GGGCGGR_SP1_Q6		CAGGTG_E12_Q6
292	SLC25A5	solute carrier family 25 (mitochondrial carrier; adenine nucleotide translocator), member 5	GGGCGGR_SP1_Q6		CAGGTG_E12_Q6
162	AP1B1	adaptor-related protein complex 1, beta 1 subunit	GGGCGGR_SP1_Q6		CAGGTG_E12_Q6
27336	HTATSF1	HIV-1 Tat specific factor 1	GGGCGGR_SP1_Q6		CAGGTG_E12_Q6
2316	FLNA	filamin A, alpha	GGGCGGR_SP1_Q6		CAGGTG_E12_Q6
153364	MBLAC2	metallo-beta-lactamase domain containing 2	GGGCGGR_SP1_Q6		CAGGTG_E12_Q6
129303	TMEM150A	transmembrane protein 150A	GGGCGGR_SP1_Q6		CAGGTG_E12_Q6
3069	HDLBP	high density lipoprotein binding protein	GGGCGGR_SP1_Q6		CAGGTG_E12_Q6
7358	UGDH	UDP-glucose 6-dehydrogenase	GGGCGGR_SP1_Q6		CAGGTG_E12_Q6
171177	RHOV	ras homolog gene family, member V	GGGCGGR_SP1_Q6		CAGGTG_E12_Q6
5208	PFKFB2	6-phosphofructo-2-kinase/fructose-2,6-biphosphatase 2	GGGCGGR_SP1_Q6		CAGGTG_E12_Q6
147007	TMEM199	transmembrane protein 199	GGGCGGR_SP1_Q6		CAGGTG_E12_Q6
50618	ITSN2	intersectin 2	GGGCGGR_SP1_Q6		CAGGTG_E12_Q6
26007	DAK	dihydroxyacetone kinase 2 homolog (S. cerevisiae)	GGGCGGR_SP1_Q6		CAGGTG_E12_Q6
286827	TRIM59	tripartite motif containing 59	GGGCGGR_SP1_Q6		CAGGTG_E12_Q6
2119	ETV5	ets variant 5	GGGCGGR_SP1_Q6			GGGAGGRR_MAZ_Q6	TTGTTT_FOXO4_01	GGGTGGRR_PAX4_03	AACTTT_UNKNOWN	TGGAAA_NFAT_Q4_01	CAGCTG_AP4_Q5	GATTGGY_NFY_Q6_01
26959	HBP1	HMG-box transcription factor 1	GGGCGGR_SP1_Q6			GGGAGGRR_MAZ_Q6	TTGTTT_FOXO4_01	GGGTGGRR_PAX4_03	AACTTT_UNKNOWN
60509	AGBL5	ATP/GTP binding protein-like 5	GGGCGGR_SP1_Q6			GGGAGGRR_MAZ_Q6	TTGTTT_FOXO4_01	GGGTGGRR_PAX4_03			CAGCTG_AP4_Q5
79071	ELOVL6	ELOVL fatty acid elongase 6	GGGCGGR_SP1_Q6			GGGAGGRR_MAZ_Q6	TTGTTT_FOXO4_01	GGGTGGRR_PAX4_03
83667	SESN2	sestrin 2	GGGCGGR_SP1_Q6			GGGAGGRR_MAZ_Q6	TTGTTT_FOXO4_01		AACTTT_UNKNOWN			GATTGGY_NFY_Q6_01
5094	PCBP2	poly(rC) binding protein 2	GGGCGGR_SP1_Q6			GGGAGGRR_MAZ_Q6	TTGTTT_FOXO4_01			TGGAAA_NFAT_Q4_01	CAGCTG_AP4_Q5
81558	FAM117A	family with sequence similarity 117, member A	GGGCGGR_SP1_Q6			GGGAGGRR_MAZ_Q6	TTGTTT_FOXO4_01			TGGAAA_NFAT_Q4_01		GATTGGY_NFY_Q6_01
8675	STX16	syntaxin 16	GGGCGGR_SP1_Q6			GGGAGGRR_MAZ_Q6	TTGTTT_FOXO4_01			TGGAAA_NFAT_Q4_01		GATTGGY_NFY_Q6_01
599	BCL2L2	BCL2-like 2	GGGCGGR_SP1_Q6			GGGAGGRR_MAZ_Q6	TTGTTT_FOXO4_01				CAGCTG_AP4_Q5
22905	EPN2	epsin 2	GGGCGGR_SP1_Q6			GGGAGGRR_MAZ_Q6	TTGTTT_FOXO4_01				CAGCTG_AP4_Q5
5499	PPP1CA	protein phosphatase 1, catalytic subunit, alpha isozyme	GGGCGGR_SP1_Q6			GGGAGGRR_MAZ_Q6	TTGTTT_FOXO4_01
54985	HCFC1R1	host cell factor C1 regulator 1 (XPO1 dependent)	GGGCGGR_SP1_Q6			GGGAGGRR_MAZ_Q6		GGGTGGRR_PAX4_03	AACTTT_UNKNOWN	TGGAAA_NFAT_Q4_01
51631	LUC7L2	LUC7-like 2 (S. cerevisiae)	GGGCGGR_SP1_Q6			GGGAGGRR_MAZ_Q6		GGGTGGRR_PAX4_03	AACTTT_UNKNOWN			GATTGGY_NFY_Q6_01
3188	HNRNPH2	heterogeneous nuclear ribonucleoprotein H2 (H')	GGGCGGR_SP1_Q6			GGGAGGRR_MAZ_Q6		GGGTGGRR_PAX4_03		TGGAAA_NFAT_Q4_01		GATTGGY_NFY_Q6_01
6988	TCTA	T-cell leukemia translocation altered gene	GGGCGGR_SP1_Q6			GGGAGGRR_MAZ_Q6		GGGTGGRR_PAX4_03		TGGAAA_NFAT_Q4_01		GATTGGY_NFY_Q6_01
1026	CDKN1A	cyclin-dependent kinase inhibitor 1A (p21, Cip1)	GGGCGGR_SP1_Q6			GGGAGGRR_MAZ_Q6		GGGTGGRR_PAX4_03		TGGAAA_NFAT_Q4_01
22924	MAPRE3	microtubule-associated protein, RP/EB family, member 3	GGGCGGR_SP1_Q6			GGGAGGRR_MAZ_Q6		GGGTGGRR_PAX4_03			CAGCTG_AP4_Q5
4201	MEA1	male-enhanced antigen 1	GGGCGGR_SP1_Q6			GGGAGGRR_MAZ_Q6		GGGTGGRR_PAX4_03
10916	MAGED2	melanoma antigen family D, 2	GGGCGGR_SP1_Q6			GGGAGGRR_MAZ_Q6		GGGTGGRR_PAX4_03
4134	MAP4	microtubule-associated protein 4	GGGCGGR_SP1_Q6			GGGAGGRR_MAZ_Q6		GGGTGGRR_PAX4_03
1176	AP3S1	adaptor-related protein complex 3, sigma 1 subunit	GGGCGGR_SP1_Q6			GGGAGGRR_MAZ_Q6		GGGTGGRR_PAX4_03
7422	VEGFA	vascular endothelial growth factor A	GGGCGGR_SP1_Q6			GGGAGGRR_MAZ_Q6			AACTTT_UNKNOWN	TGGAAA_NFAT_Q4_01	CAGCTG_AP4_Q5
7514	XPO1	exportin 1 (CRM1 homolog, yeast)	GGGCGGR_SP1_Q6			GGGAGGRR_MAZ_Q6			AACTTT_UNKNOWN	TGGAAA_NFAT_Q4_01
3614	IMPDH1	IMP (inosine 5'-monophosphate) dehydrogenase 1	GGGCGGR_SP1_Q6			GGGAGGRR_MAZ_Q6			AACTTT_UNKNOWN		CAGCTG_AP4_Q5
5216	PFN1	profilin 1	GGGCGGR_SP1_Q6			GGGAGGRR_MAZ_Q6			AACTTT_UNKNOWN
7360	UGP2	UDP-glucose pyrophosphorylase 2	GGGCGGR_SP1_Q6			GGGAGGRR_MAZ_Q6			AACTTT_UNKNOWN
23047	PDS5B	PDS5, regulator of cohesion maintenance, homolog B (S. cerevisiae)	GGGCGGR_SP1_Q6			GGGAGGRR_MAZ_Q6			AACTTT_UNKNOWN
1615	DARS	aspartyl-tRNA synthetase	GGGCGGR_SP1_Q6			GGGAGGRR_MAZ_Q6			AACTTT_UNKNOWN
2288	FKBP4	FK506 binding protein 4, 59kDa	GGGCGGR_SP1_Q6			GGGAGGRR_MAZ_Q6			AACTTT_UNKNOWN
11000	SLC27A3	solute carrier family 27 (fatty acid transporter), member 3	GGGCGGR_SP1_Q6			GGGAGGRR_MAZ_Q6				TGGAAA_NFAT_Q4_01
91663	MYADM	myeloid-associated differentiation marker	GGGCGGR_SP1_Q6			GGGAGGRR_MAZ_Q6					CAGCTG_AP4_Q5
10633	RASL10A	RAS-like, family 10, member A	GGGCGGR_SP1_Q6			GGGAGGRR_MAZ_Q6					CAGCTG_AP4_Q5
10092	ARPC5	actin related protein 2/3 complex, subunit 5, 16kDa	GGGCGGR_SP1_Q6			GGGAGGRR_MAZ_Q6						GATTGGY_NFY_Q6_01
5598	MAPK7	mitogen-activated protein kinase 7	GGGCGGR_SP1_Q6			GGGAGGRR_MAZ_Q6						GATTGGY_NFY_Q6_01
1973	EIF4A1	eukaryotic translation initiation factor 4A1	GGGCGGR_SP1_Q6			GGGAGGRR_MAZ_Q6
11031	RAB31	RAB31, member RAS oncogene family	GGGCGGR_SP1_Q6			GGGAGGRR_MAZ_Q6
56654	NPDC1	neural proliferation, differentiation and control, 1	GGGCGGR_SP1_Q6			GGGAGGRR_MAZ_Q6
10250	SRRM1	serine/arginine repetitive matrix 1	GGGCGGR_SP1_Q6			GGGAGGRR_MAZ_Q6
79800	ALS2CR8	amyotrophic lateral sclerosis 2 (juvenile) chromosome region, candidate 8	GGGCGGR_SP1_Q6			GGGAGGRR_MAZ_Q6
10051	SMC4	structural maintenance of chromosomes 4	GGGCGGR_SP1_Q6			GGGAGGRR_MAZ_Q6
57560	IFT80	intraflagellar transport 80 homolog (Chlamydomonas)	GGGCGGR_SP1_Q6			GGGAGGRR_MAZ_Q6
7408	VASP	vasodilator-stimulated phosphoprotein	GGGCGGR_SP1_Q6			GGGAGGRR_MAZ_Q6
1192	CLIC1	chloride intracellular channel 1	GGGCGGR_SP1_Q6			GGGAGGRR_MAZ_Q6
51062	ATL1	atlastin GTPase 1	GGGCGGR_SP1_Q6			GGGAGGRR_MAZ_Q6
3417	IDH1	isocitrate dehydrogenase 1 (NADP+), soluble	GGGCGGR_SP1_Q6			GGGAGGRR_MAZ_Q6
3998	LMAN1	lectin, mannose-binding, 1	GGGCGGR_SP1_Q6			GGGAGGRR_MAZ_Q6
10444	ZER1	zer-1 homolog (C. elegans)	GGGCGGR_SP1_Q6			GGGAGGRR_MAZ_Q6
26231	LRRC29	leucine rich repeat containing 29	GGGCGGR_SP1_Q6			GGGAGGRR_MAZ_Q6
10363	HMG20A	high mobility group 20A	GGGCGGR_SP1_Q6			GGGAGGRR_MAZ_Q6
10215	OLIG2	oligodendrocyte lineage transcription factor 2	GGGCGGR_SP1_Q6			GGGAGGRR_MAZ_Q6
1394	CRHR1	corticotropin releasing hormone receptor 1	GGGCGGR_SP1_Q6			GGGAGGRR_MAZ_Q6
10312	TCIRG1	T-cell, immune regulator 1, ATPase, H+ transporting, lysosomal V0 subunit A3	GGGCGGR_SP1_Q6			GGGAGGRR_MAZ_Q6
10435	CDC42EP2	CDC42 effector protein (Rho GTPase binding) 2	GGGCGGR_SP1_Q6			GGGAGGRR_MAZ_Q6
65260	SELRC1	Sel1 repeat containing 1	GGGCGGR_SP1_Q6			GGGAGGRR_MAZ_Q6
3350	HTR1A	5-hydroxytryptamine (serotonin) receptor 1A	GGGCGGR_SP1_Q6			GGGAGGRR_MAZ_Q6
6136	RPL12	ribosomal protein L12	GGGCGGR_SP1_Q6			GGGAGGRR_MAZ_Q6
6880	TAF9	TAF9 RNA polymerase II, TATA box binding protein (TBP)-associated factor, 32kDa	GGGCGGR_SP1_Q6			GGGAGGRR_MAZ_Q6
10654	PMVK	phosphomevalonate kinase	GGGCGGR_SP1_Q6			GGGAGGRR_MAZ_Q6
56479	KCNQ5	potassium voltage-gated channel, KQT-like subfamily, member 5	GGGCGGR_SP1_Q6				TTGTTT_FOXO4_01	GGGTGGRR_PAX4_03		TGGAAA_NFAT_Q4_01	CAGCTG_AP4_Q5
79142	PHF23	PHD finger protein 23	GGGCGGR_SP1_Q6				TTGTTT_FOXO4_01	GGGTGGRR_PAX4_03			CAGCTG_AP4_Q5
51673	TPPP3	tubulin polymerization-promoting protein family member 3	GGGCGGR_SP1_Q6				TTGTTT_FOXO4_01	GGGTGGRR_PAX4_03			CAGCTG_AP4_Q5
1027	CDKN1B	cyclin-dependent kinase inhibitor 1B (p27, Kip1)	GGGCGGR_SP1_Q6				TTGTTT_FOXO4_01	GGGTGGRR_PAX4_03			CAGCTG_AP4_Q5
51069	MRPL2	mitochondrial ribosomal protein L2	GGGCGGR_SP1_Q6				TTGTTT_FOXO4_01	GGGTGGRR_PAX4_03				GATTGGY_NFY_Q6_01
25906	C11orf51	chromosome 11 open reading frame 51	GGGCGGR_SP1_Q6				TTGTTT_FOXO4_01	GGGTGGRR_PAX4_03
4254	KITLG	KIT ligand	GGGCGGR_SP1_Q6				TTGTTT_FOXO4_01		AACTTT_UNKNOWN
9657	IQCB1	IQ motif containing B1	GGGCGGR_SP1_Q6				TTGTTT_FOXO4_01			TGGAAA_NFAT_Q4_01		GATTGGY_NFY_Q6_01
83473	KATNAL2	katanin p60 subunit A-like 2	GGGCGGR_SP1_Q6				TTGTTT_FOXO4_01			TGGAAA_NFAT_Q4_01		GATTGGY_NFY_Q6_01
54521	WDR44	WD repeat domain 44	GGGCGGR_SP1_Q6				TTGTTT_FOXO4_01			TGGAAA_NFAT_Q4_01
6541	SLC7A1	solute carrier family 7 (cationic amino acid transporter, y+ system), member 1	GGGCGGR_SP1_Q6				TTGTTT_FOXO4_01			TGGAAA_NFAT_Q4_01
4678	NASP	nuclear autoantigenic sperm protein (histone-binding)	GGGCGGR_SP1_Q6				TTGTTT_FOXO4_01					GATTGGY_NFY_Q6_01
3145	HMBS	hydroxymethylbilane synthase	GGGCGGR_SP1_Q6				TTGTTT_FOXO4_01					GATTGGY_NFY_Q6_01
81876	RAB1B	RAB1B, member RAS oncogene family	GGGCGGR_SP1_Q6				TTGTTT_FOXO4_01
4259	MGST3	microsomal glutathione S-transferase 3	GGGCGGR_SP1_Q6				TTGTTT_FOXO4_01
23710	GABARAPL1	GABA(A) receptor-associated protein like 1	GGGCGGR_SP1_Q6				TTGTTT_FOXO4_01
7862	BRPF1	bromodomain and PHD finger containing, 1	GGGCGGR_SP1_Q6				TTGTTT_FOXO4_01
83943	IMMP2L	IMP2 inner mitochondrial membrane peptidase-like (S. cerevisiae)	GGGCGGR_SP1_Q6				TTGTTT_FOXO4_01
10818	FRS2	fibroblast growth factor receptor substrate 2	GGGCGGR_SP1_Q6				TTGTTT_FOXO4_01
9585	KIF20B	kinesin family member 20B	GGGCGGR_SP1_Q6				TTGTTT_FOXO4_01
55974	SLC50A1	solute carrier family 50 (sugar transporter), member 1	GGGCGGR_SP1_Q6				TTGTTT_FOXO4_01
55014	STX17	syntaxin 17	GGGCGGR_SP1_Q6				TTGTTT_FOXO4_01
622	BDH1	3-hydroxybutyrate dehydrogenase, type 1	GGGCGGR_SP1_Q6				TTGTTT_FOXO4_01
30061	SLC40A1	solute carrier family 40 (iron-regulated transporter), member 1	GGGCGGR_SP1_Q6				TTGTTT_FOXO4_01
8499	PPFIA2	protein tyrosine phosphatase, receptor type, f polypeptide (PTPRF), interacting protein (liprin), alpha 2	GGGCGGR_SP1_Q6					GGGTGGRR_PAX4_03	AACTTT_UNKNOWN	TGGAAA_NFAT_Q4_01
91452	ACBD5	acyl-CoA binding domain containing 5	GGGCGGR_SP1_Q6					GGGTGGRR_PAX4_03	AACTTT_UNKNOWN
4641	MYO1C	myosin IC	GGGCGGR_SP1_Q6					GGGTGGRR_PAX4_03		TGGAAA_NFAT_Q4_01	CAGCTG_AP4_Q5
89848	FCHSD1	FCH and double SH3 domains 1	GGGCGGR_SP1_Q6					GGGTGGRR_PAX4_03		TGGAAA_NFAT_Q4_01
51754	TMEM8B	transmembrane protein 8B	GGGCGGR_SP1_Q6					GGGTGGRR_PAX4_03			CAGCTG_AP4_Q5	GATTGGY_NFY_Q6_01
56658	TRIM39	tripartite motif containing 39	GGGCGGR_SP1_Q6					GGGTGGRR_PAX4_03			CAGCTG_AP4_Q5
573	BAG1	BCL2-associated athanogene	GGGCGGR_SP1_Q6					GGGTGGRR_PAX4_03
11059	WWP1	WW domain containing E3 ubiquitin protein ligase 1	GGGCGGR_SP1_Q6					GGGTGGRR_PAX4_03
5899	RALB	v-ral simian leukemia viral oncogene homolog B (ras related; GTP binding protein)	GGGCGGR_SP1_Q6					GGGTGGRR_PAX4_03
23139	MAST2	microtubule associated serine/threonine kinase 2	GGGCGGR_SP1_Q6					GGGTGGRR_PAX4_03
10421	CD2BP2	CD2 (cytoplasmic tail) binding protein 2	GGGCGGR_SP1_Q6					GGGTGGRR_PAX4_03
26262	TSPAN17	tetraspanin 17	GGGCGGR_SP1_Q6					GGGTGGRR_PAX4_03
5255	PHKA1	phosphorylase kinase, alpha 1 (muscle)	GGGCGGR_SP1_Q6						AACTTT_UNKNOWN	TGGAAA_NFAT_Q4_01	CAGCTG_AP4_Q5
10725	NFAT5	nuclear factor of activated T-cells 5, tonicity-responsive	GGGCGGR_SP1_Q6						AACTTT_UNKNOWN	TGGAAA_NFAT_Q4_01
6786	STIM1	stromal interaction molecule 1	GGGCGGR_SP1_Q6						AACTTT_UNKNOWN		CAGCTG_AP4_Q5	GATTGGY_NFY_Q6_01
127544	RNF19B	ring finger protein 19B	GGGCGGR_SP1_Q6						AACTTT_UNKNOWN		CAGCTG_AP4_Q5
7465	WEE1	WEE1 homolog (S. pombe)	GGGCGGR_SP1_Q6						AACTTT_UNKNOWN			GATTGGY_NFY_Q6_01
23788	MTCH2	mitochondrial carrier 2	GGGCGGR_SP1_Q6						AACTTT_UNKNOWN
55117	SLC6A15	solute carrier family 6 (neutral amino acid transporter), member 15	GGGCGGR_SP1_Q6						AACTTT_UNKNOWN
55704	CCDC88A	coiled-coil domain containing 88A	GGGCGGR_SP1_Q6						AACTTT_UNKNOWN
131034	CPNE4	copine IV	GGGCGGR_SP1_Q6						AACTTT_UNKNOWN
90203	SNX21	sorting nexin family member 21	GGGCGGR_SP1_Q6						AACTTT_UNKNOWN
1272	CNTN1	contactin 1	GGGCGGR_SP1_Q6						AACTTT_UNKNOWN
5565	PRKAB2	protein kinase, AMP-activated, beta 2 non-catalytic subunit	GGGCGGR_SP1_Q6						AACTTT_UNKNOWN
9653	HS2ST1	heparan sulfate 2-O-sulfotransferase 1	GGGCGGR_SP1_Q6						AACTTT_UNKNOWN
2786	GNG4	guanine nucleotide binding protein (G protein), gamma 4	GGGCGGR_SP1_Q6						AACTTT_UNKNOWN
7220	TRPC1	transient receptor potential cation channel, subfamily C, member 1	GGGCGGR_SP1_Q6						AACTTT_UNKNOWN
2595	GANC	glucosidase, alpha; neutral C	GGGCGGR_SP1_Q6						AACTTT_UNKNOWN
54361	WNT4	wingless-type MMTV integration site family, member 4	GGGCGGR_SP1_Q6							TGGAAA_NFAT_Q4_01	CAGCTG_AP4_Q5
54704	PDP1	pyruvate dehyrogenase phosphatase catalytic subunit 1	GGGCGGR_SP1_Q6							TGGAAA_NFAT_Q4_01		GATTGGY_NFY_Q6_01
51735	RAPGEF6	Rap guanine nucleotide exchange factor (GEF) 6	GGGCGGR_SP1_Q6							TGGAAA_NFAT_Q4_01
8655	DYNLL1	dynein, light chain, LC8-type 1	GGGCGGR_SP1_Q6							TGGAAA_NFAT_Q4_01
148741	ANKRD35	ankyrin repeat domain 35	GGGCGGR_SP1_Q6							TGGAAA_NFAT_Q4_01
25816	TNFAIP8	tumor necrosis factor, alpha-induced protein 8	GGGCGGR_SP1_Q6							TGGAAA_NFAT_Q4_01
10211	FLOT1	flotillin 1	GGGCGGR_SP1_Q6							TGGAAA_NFAT_Q4_01
4649	MYO9A	myosin IXA	GGGCGGR_SP1_Q6							TGGAAA_NFAT_Q4_01
387338	NSUN4	NOP2/Sun domain family, member 4	GGGCGGR_SP1_Q6							TGGAAA_NFAT_Q4_01
29890	RBM15B	RNA binding motif protein 15B	GGGCGGR_SP1_Q6								CAGCTG_AP4_Q5
56936	C14orf162	chromosome 14 open reading frame 162	GGGCGGR_SP1_Q6								CAGCTG_AP4_Q5
54795	TRPM4	transient receptor potential cation channel, subfamily M, member 4	GGGCGGR_SP1_Q6								CAGCTG_AP4_Q5
7295	TXN	thioredoxin	GGGCGGR_SP1_Q6								CAGCTG_AP4_Q5
57679	ALS2	amyotrophic lateral sclerosis 2 (juvenile)	GGGCGGR_SP1_Q6								CAGCTG_AP4_Q5
115703	ARHGAP33	Rho GTPase activating protein 33	GGGCGGR_SP1_Q6								CAGCTG_AP4_Q5
7920	ABHD16A	abhydrolase domain containing 16A	GGGCGGR_SP1_Q6								CAGCTG_AP4_Q5
79644	SRD5A3	steroid 5 alpha-reductase 3	GGGCGGR_SP1_Q6								CAGCTG_AP4_Q5
10629	TAF6L	TAF6-like RNA polymerase II, p300/CBP-associated factor (PCAF)-associated factor, 65kDa	GGGCGGR_SP1_Q6									GATTGGY_NFY_Q6_01
1153	CIRBP	cold inducible RNA binding protein	GGGCGGR_SP1_Q6									GATTGGY_NFY_Q6_01
7203	CCT3	chaperonin containing TCP1, subunit 3 (gamma)	GGGCGGR_SP1_Q6									GATTGGY_NFY_Q6_01
27005	USP21	ubiquitin specific peptidase 21	GGGCGGR_SP1_Q6									GATTGGY_NFY_Q6_01
2923	PDIA3	protein disulfide isomerase family A, member 3	GGGCGGR_SP1_Q6									GATTGGY_NFY_Q6_01
151246	SGOL2	shugoshin-like 2 (S. pombe)	GGGCGGR_SP1_Q6									GATTGGY_NFY_Q6_01
2287	FKBP3	FK506 binding protein 3, 25kDa	GGGCGGR_SP1_Q6									GATTGGY_NFY_Q6_01
54957	TXNL4B	thioredoxin-like 4B	GGGCGGR_SP1_Q6									GATTGGY_NFY_Q6_01
9785	DHX38	DEAH (Asp-Glu-Ala-His) box polypeptide 38	GGGCGGR_SP1_Q6									GATTGGY_NFY_Q6_01
9552	SPAG7	sperm associated antigen 7	GGGCGGR_SP1_Q6									GATTGGY_NFY_Q6_01
7153	TOP2A	topoisomerase (DNA) II alpha 170kDa	GGGCGGR_SP1_Q6									GATTGGY_NFY_Q6_01
4548	MTR	5-methyltetrahydrofolate-homocysteine methyltransferase	GGGCGGR_SP1_Q6									GATTGGY_NFY_Q6_01
983	CDK1	cyclin-dependent kinase 1	GGGCGGR_SP1_Q6									GATTGGY_NFY_Q6_01
8863	PER3	period homolog 3 (Drosophila)	GGGCGGR_SP1_Q6									GATTGGY_NFY_Q6_01
9924	PAN2	PAN2 poly(A) specific ribonuclease subunit homolog (S. cerevisiae)	GGGCGGR_SP1_Q6									GATTGGY_NFY_Q6_01
2222	FDFT1	farnesyl-diphosphate farnesyltransferase 1	GGGCGGR_SP1_Q6									GATTGGY_NFY_Q6_01
51258	MRPL51	mitochondrial ribosomal protein L51	GGGCGGR_SP1_Q6									GATTGGY_NFY_Q6_01
9918	NCAPD2	non-SMC condensin I complex, subunit D2	GGGCGGR_SP1_Q6									GATTGGY_NFY_Q6_01
54509	RHOF	ras homolog gene family, member F (in filopodia)	GGGCGGR_SP1_Q6									GATTGGY_NFY_Q6_01
7108	TM7SF2	transmembrane 7 superfamily member 2	GGGCGGR_SP1_Q6									GATTGGY_NFY_Q6_01
4597	MVD	mevalonate (diphospho) decarboxylase	GGGCGGR_SP1_Q6									GATTGGY_NFY_Q6_01
7517	XRCC3	X-ray repair complementing defective repair in Chinese hamster cells 3	GGGCGGR_SP1_Q6									GATTGGY_NFY_Q6_01
23623	RUSC1	RUN and SH3 domain containing 1	GGGCGGR_SP1_Q6
57530	CGN	cingulin	GGGCGGR_SP1_Q6
55753	OGDHL	oxoglutarate dehydrogenase-like	GGGCGGR_SP1_Q6
80142	PTGES2	prostaglandin E synthase 2	GGGCGGR_SP1_Q6
254042	METAP1D	methionyl aminopeptidase type 1D (mitochondrial)	GGGCGGR_SP1_Q6
126792	B3GALT6	UDP-Gal:betaGal beta 1,3-galactosyltransferase polypeptide 6	GGGCGGR_SP1_Q6
6223	RPS19	ribosomal protein S19	GGGCGGR_SP1_Q6
79411	GLB1L	galactosidase, beta 1-like	GGGCGGR_SP1_Q6
57143	ADCK1	aarF domain containing kinase 1	GGGCGGR_SP1_Q6
25847	ANAPC13	anaphase promoting complex subunit 13	GGGCGGR_SP1_Q6
80254	CEP63	centrosomal protein 63kDa	GGGCGGR_SP1_Q6
6945	MLX	MAX-like protein X	GGGCGGR_SP1_Q6
63891	RNF123	ring finger protein 123	GGGCGGR_SP1_Q6
201232	SLC16A13	solute carrier family 16, member 13 (monocarboxylic acid transporter 13)	GGGCGGR_SP1_Q6
826	CAPNS1	calpain, small subunit 1	GGGCGGR_SP1_Q6
26091	HERC4	hect domain and RLD 4	GGGCGGR_SP1_Q6
5771	PTPN2	protein tyrosine phosphatase, non-receptor type 2	GGGCGGR_SP1_Q6
64793	CEP85	centrosomal protein 85kDa	GGGCGGR_SP1_Q6
115825	WDFY2	WD repeat and FYVE domain containing 2	GGGCGGR_SP1_Q6
113235	SLC46A1	solute carrier family 46 (folate transporter), member 1	GGGCGGR_SP1_Q6
80776	B9D2	B9 protein domain 2	GGGCGGR_SP1_Q6
195828	ZNF367	zinc finger protein 367	GGGCGGR_SP1_Q6
367	AR	androgen receptor	GGGCGGR_SP1_Q6
1173	AP2M1	adaptor-related protein complex 2, mu 1 subunit	GGGCGGR_SP1_Q6
6191	RPS4X	ribosomal protein S4, X-linked	GGGCGGR_SP1_Q6
118881	COMTD1	catechol-O-methyltransferase domain containing 1	GGGCGGR_SP1_Q6
127829	ARL8A	ADP-ribosylation factor-like 8A	GGGCGGR_SP1_Q6
79934	ADCK4	aarF domain containing kinase 4	GGGCGGR_SP1_Q6
60678	EEFSEC	eukaryotic elongation factor, selenocysteine-tRNA-specific	GGGCGGR_SP1_Q6
25827	FBXL2	F-box and leucine-rich repeat protein 2	GGGCGGR_SP1_Q6
7041	TGFB1I1	transforming growth factor beta 1 induced transcript 1	GGGCGGR_SP1_Q6
84330	ZNF414	zinc finger protein 414	GGGCGGR_SP1_Q6
56605	ERO1LB	ERO1-like beta (S. cerevisiae)	GGGCGGR_SP1_Q6
55236	UBA6	ubiquitin-like modifier activating enzyme 6	GGGCGGR_SP1_Q6
1944	EFNA3	ephrin-A3	GGGCGGR_SP1_Q6
819	CAMLG	calcium modulating ligand	GGGCGGR_SP1_Q6
139065	SLITRK4	SLIT and NTRK-like family, member 4	GGGCGGR_SP1_Q6
11140	CDC37	cell division cycle 37 homolog (S. cerevisiae)	GGGCGGR_SP1_Q6
811	CALR	calreticulin	GGGCGGR_SP1_Q6
116448	OLIG1	oligodendrocyte transcription factor 1	GGGCGGR_SP1_Q6
23474	ETHE1	ethylmalonic encephalopathy 1	GGGCGGR_SP1_Q6
9695	EDEM1	ER degradation enhancer, mannosidase alpha-like 1	GGGCGGR_SP1_Q6
387496	RASL11A	RAS-like, family 11, member A	GGGCGGR_SP1_Q6
79709	GLT25D1	glycosyltransferase 25 domain containing 1	GGGCGGR_SP1_Q6
4247	MGAT2	mannosyl (alpha-1,6-)-glycoprotein beta-1,2-N-acetylglucosaminyltransferase	GGGCGGR_SP1_Q6
55247	NEIL3	nei endonuclease VIII-like 3 (E. coli)	GGGCGGR_SP1_Q6
9367	RAB9A	RAB9A, member RAS oncogene family	GGGCGGR_SP1_Q6
79183	TTPAL	tocopherol (alpha) transfer protein-like	GGGCGGR_SP1_Q6
7818	DAP3	death associated protein 3	GGGCGGR_SP1_Q6
3688	ITGB1	integrin, beta 1 (fibronectin receptor, beta polypeptide, antigen CD29 includes MDF2, MSK12)	GGGCGGR_SP1_Q6
23339	VPS39	vacuolar protein sorting 39 homolog (S. cerevisiae)	GGGCGGR_SP1_Q6
23315	SLC9A8	solute carrier family 9 (sodium/hydrogen exchanger), member 8	GGGCGGR_SP1_Q6
5333	PLCD1	phospholipase C, delta 1	GGGCGGR_SP1_Q6
6576	SLC25A1	solute carrier family 25 (mitochondrial carrier; citrate transporter), member 1	GGGCGGR_SP1_Q6
29997	GLTSCR2	glioma tumor suppressor candidate region gene 2	GGGCGGR_SP1_Q6
57794	SUGP1	SURP and G patch domain containing 1	GGGCGGR_SP1_Q6
6861	SYT5	synaptotagmin V	GGGCGGR_SP1_Q6
54878	DPP8	dipeptidyl-peptidase 8	GGGCGGR_SP1_Q6
6429	SRSF4	serine/arginine-rich splicing factor 4	GGGCGGR_SP1_Q6
85437	ZCRB1	zinc finger CCHC-type and RNA binding motif 1	GGGCGGR_SP1_Q6
152185	SPICE1	spindle and centriole associated protein 1	GGGCGGR_SP1_Q6
83933	HDAC10	histone deacetylase 10	GGGCGGR_SP1_Q6
51629	SLC25A39	solute carrier family 25, member 39	GGGCGGR_SP1_Q6
26013	L3MBTL1	l(3)mbt-like 1 (Drosophila)	GGGCGGR_SP1_Q6
112939	NACC1	nucleus accumbens associated 1, BEN and BTB (POZ) domain containing	GGGCGGR_SP1_Q6
144715	RAD9B	RAD9 homolog B (S. pombe)	GGGCGGR_SP1_Q6
51699	VPS29	vacuolar protein sorting 29 homolog (S. cerevisiae)	GGGCGGR_SP1_Q6
29985	SLC39A3	solute carrier family 39 (zinc transporter), member 3	GGGCGGR_SP1_Q6
27012	KCNV1	potassium channel, subfamily V, member 1	GGGCGGR_SP1_Q6
154661	RUNDC3B	RUN domain containing 3B	GGGCGGR_SP1_Q6
9001	HAP1	huntingtin-associated protein 1	GGGCGGR_SP1_Q6
57214	KIAA1199	KIAA1199	GGGCGGR_SP1_Q6
84932	RAB2B	RAB2B, member RAS oncogene family	GGGCGGR_SP1_Q6
84245	MRI1	methylthioribose-1-phosphate isomerase homolog (S. cerevisiae)	GGGCGGR_SP1_Q6
51112	TTC15	tetratricopeptide repeat domain 15	GGGCGGR_SP1_Q6
257218	SHPRH	SNF2 histone linker PHD RING helicase	GGGCGGR_SP1_Q6
114757	CYGB	cytoglobin	GGGCGGR_SP1_Q6
4128	MAOA	monoamine oxidase A	GGGCGGR_SP1_Q6
4502	MT2A	metallothionein 2A	GGGCGGR_SP1_Q6
3684	ITGAM	integrin, alpha M (complement component 3 receptor 3 subunit)	GGGCGGR_SP1_Q6
51203	NUSAP1	nucleolar and spindle associated protein 1	GGGCGGR_SP1_Q6
29800	ZDHHC1	zinc finger, DHHC-type containing 1	GGGCGGR_SP1_Q6
1595	CYP51A1	cytochrome P450, family 51, subfamily A, polypeptide 1	GGGCGGR_SP1_Q6
537	ATP6AP1	ATPase, H+ transporting, lysosomal accessory protein 1	GGGCGGR_SP1_Q6
340371	NRBP2	nuclear receptor binding protein 2	GGGCGGR_SP1_Q6
6885	MAP3K7	mitogen-activated protein kinase kinase kinase 7	GGGCGGR_SP1_Q6
5195	PEX14	peroxisomal biogenesis factor 14	GGGCGGR_SP1_Q6
23557	SNAPIN	SNAP-associated protein	GGGCGGR_SP1_Q6
5372	PMM1	phosphomannomutase 1	GGGCGGR_SP1_Q6
55229	PANK4	pantothenate kinase 4	GGGCGGR_SP1_Q6
7988	ZNF212	zinc finger protein 212	GGGCGGR_SP1_Q6
22927	HABP4	hyaluronan binding protein 4	GGGCGGR_SP1_Q6
2319	FLOT2	flotillin 2	GGGCGGR_SP1_Q6
84904	C9orf100	chromosome 9 open reading frame 100	GGGCGGR_SP1_Q6
9377	COX5A	cytochrome c oxidase subunit Va	GGGCGGR_SP1_Q6
83930	STARD3NL	STARD3 N-terminal like	GGGCGGR_SP1_Q6
126074	C19orf39	chromosome 19 open reading frame 39	GGGCGGR_SP1_Q6
5702	PSMC3	proteasome (prosome, macropain) 26S subunit, ATPase, 3	GGGCGGR_SP1_Q6
29904	EEF2K	eukaryotic elongation factor-2 kinase	GGGCGGR_SP1_Q6
1891	ECH1	enoyl CoA hydratase 1, peroxisomal	GGGCGGR_SP1_Q6
56942	C16orf61	chromosome 16 open reading frame 61	GGGCGGR_SP1_Q6
147965	FAM98C	family with sequence similarity 98, member C	GGGCGGR_SP1_Q6
150468	CKAP2L	cytoskeleton associated protein 2-like	GGGCGGR_SP1_Q6
220134	SKA1	spindle and kinetochore associated complex subunit 1	GGGCGGR_SP1_Q6
353	APRT	adenine phosphoribosyltransferase	GGGCGGR_SP1_Q6
39	ACAT2	acetyl-CoA acetyltransferase 2	GGGCGGR_SP1_Q6
4043	LRPAP1	low density lipoprotein receptor-related protein associated protein 1	GGGCGGR_SP1_Q6
4437	MSH3	mutS homolog 3 (E. coli)	GGGCGGR_SP1_Q6
4986	OPRK1	opioid receptor, kappa 1	GGGCGGR_SP1_Q6
51478	HSD17B7	hydroxysteroid (17-beta) dehydrogenase 7	GGGCGGR_SP1_Q6
55320	MIS18BP1	MIS18 binding protein 1	GGGCGGR_SP1_Q6
65992	DDRGK1	DDRGK domain containing 1	GGGCGGR_SP1_Q6
79830	ZMYM1	zinc finger, MYM-type 1	GGGCGGR_SP1_Q6
79831	JMJD5	jumonji domain containing 5	GGGCGGR_SP1_Q6
79850	FAM57A	family with sequence similarity 57, member A	GGGCGGR_SP1_Q6
79913	ACTR5	ARP5 actin-related protein 5 homolog (yeast)	GGGCGGR_SP1_Q6
9055	PRC1	protein regulator of cytokinesis 1	GGGCGGR_SP1_Q6
94056	SYAP1	synapse associated protein 1	GGGCGGR_SP1_Q6
9439	MED23	mediator complex subunit 23	GGGCGGR_SP1_Q6
6781	STC1	stanniocalcin 1		CTTTGT_LEF1_Q2	CAGGTG_E12_Q6	GGGAGGRR_MAZ_Q6	TTGTTT_FOXO4_01		AACTTT_UNKNOWN	TGGAAA_NFAT_Q4_01		GATTGGY_NFY_Q6_01
55885	LMO3	LIM domain only 3 (rhombotin-like 2)		CTTTGT_LEF1_Q2	CAGGTG_E12_Q6	GGGAGGRR_MAZ_Q6	TTGTTT_FOXO4_01		AACTTT_UNKNOWN	TGGAAA_NFAT_Q4_01
3062	HCRTR2	hypocretin (orexin) receptor 2		CTTTGT_LEF1_Q2	CAGGTG_E12_Q6	GGGAGGRR_MAZ_Q6	TTGTTT_FOXO4_01		AACTTT_UNKNOWN
10752	CHL1	cell adhesion molecule with homology to L1CAM (close homolog of L1)		CTTTGT_LEF1_Q2	CAGGTG_E12_Q6	GGGAGGRR_MAZ_Q6	TTGTTT_FOXO4_01			TGGAAA_NFAT_Q4_01
6860	SYT4	synaptotagmin IV		CTTTGT_LEF1_Q2	CAGGTG_E12_Q6	GGGAGGRR_MAZ_Q6	TTGTTT_FOXO4_01			TGGAAA_NFAT_Q4_01
9363	RAB33A	RAB33A, member RAS oncogene family		CTTTGT_LEF1_Q2	CAGGTG_E12_Q6	GGGAGGRR_MAZ_Q6	TTGTTT_FOXO4_01				CAGCTG_AP4_Q5
7170	TPM3	tropomyosin 3		CTTTGT_LEF1_Q2	CAGGTG_E12_Q6	GGGAGGRR_MAZ_Q6		GGGTGGRR_PAX4_03	AACTTT_UNKNOWN	TGGAAA_NFAT_Q4_01	CAGCTG_AP4_Q5
116154	PHACTR3	phosphatase and actin regulator 3		CTTTGT_LEF1_Q2	CAGGTG_E12_Q6	GGGAGGRR_MAZ_Q6		GGGTGGRR_PAX4_03	AACTTT_UNKNOWN	TGGAAA_NFAT_Q4_01
120	ADD3	adducin 3 (gamma)		CTTTGT_LEF1_Q2	CAGGTG_E12_Q6	GGGAGGRR_MAZ_Q6		GGGTGGRR_PAX4_03	AACTTT_UNKNOWN	TGGAAA_NFAT_Q4_01
2275	FHL3	four and a half LIM domains 3		CTTTGT_LEF1_Q2	CAGGTG_E12_Q6	GGGAGGRR_MAZ_Q6		GGGTGGRR_PAX4_03		TGGAAA_NFAT_Q4_01	CAGCTG_AP4_Q5
51087	YBX2	Y box binding protein 2		CTTTGT_LEF1_Q2	CAGGTG_E12_Q6	GGGAGGRR_MAZ_Q6		GGGTGGRR_PAX4_03			CAGCTG_AP4_Q5
6900	CNTN2	contactin 2 (axonal)		CTTTGT_LEF1_Q2	CAGGTG_E12_Q6	GGGAGGRR_MAZ_Q6		GGGTGGRR_PAX4_03			CAGCTG_AP4_Q5
7066	THPO	thrombopoietin		CTTTGT_LEF1_Q2	CAGGTG_E12_Q6	GGGAGGRR_MAZ_Q6		GGGTGGRR_PAX4_03			CAGCTG_AP4_Q5
59353	TMEM35	transmembrane protein 35		CTTTGT_LEF1_Q2	CAGGTG_E12_Q6	GGGAGGRR_MAZ_Q6			AACTTT_UNKNOWN	TGGAAA_NFAT_Q4_01	CAGCTG_AP4_Q5
11060	WWP2	WW domain containing E3 ubiquitin protein ligase 2		CTTTGT_LEF1_Q2	CAGGTG_E12_Q6	GGGAGGRR_MAZ_Q6			AACTTT_UNKNOWN	TGGAAA_NFAT_Q4_01
2353	FOS	FBJ murine osteosarcoma viral oncogene homolog		CTTTGT_LEF1_Q2	CAGGTG_E12_Q6	GGGAGGRR_MAZ_Q6			AACTTT_UNKNOWN	TGGAAA_NFAT_Q4_01
5991	RFX3	regulatory factor X, 3 (influences HLA class II expression)		CTTTGT_LEF1_Q2	CAGGTG_E12_Q6	GGGAGGRR_MAZ_Q6			AACTTT_UNKNOWN
4983	OPHN1	oligophrenin 1		CTTTGT_LEF1_Q2	CAGGTG_E12_Q6	GGGAGGRR_MAZ_Q6				TGGAAA_NFAT_Q4_01
5585	PKN1	protein kinase N1		CTTTGT_LEF1_Q2	CAGGTG_E12_Q6	GGGAGGRR_MAZ_Q6
84553	C6orf168	chromosome 6 open reading frame 168		CTTTGT_LEF1_Q2	CAGGTG_E12_Q6	GGGAGGRR_MAZ_Q6
9312	KCNB2	potassium voltage-gated channel, Shab-related subfamily, member 2		CTTTGT_LEF1_Q2	CAGGTG_E12_Q6	GGGAGGRR_MAZ_Q6
54874	FNBP1L	formin binding protein 1-like		CTTTGT_LEF1_Q2	CAGGTG_E12_Q6	GGGAGGRR_MAZ_Q6
23208	SYT11	synaptotagmin XI		CTTTGT_LEF1_Q2	CAGGTG_E12_Q6	GGGAGGRR_MAZ_Q6
157807	CLVS1	clavesin 1		CTTTGT_LEF1_Q2	CAGGTG_E12_Q6		TTGTTT_FOXO4_01	GGGTGGRR_PAX4_03	AACTTT_UNKNOWN	TGGAAA_NFAT_Q4_01	CAGCTG_AP4_Q5
57561	ARRDC3	arrestin domain containing 3		CTTTGT_LEF1_Q2	CAGGTG_E12_Q6		TTGTTT_FOXO4_01	GGGTGGRR_PAX4_03	AACTTT_UNKNOWN	TGGAAA_NFAT_Q4_01		GATTGGY_NFY_Q6_01
22882	ZHX2	zinc fingers and homeoboxes 2		CTTTGT_LEF1_Q2	CAGGTG_E12_Q6		TTGTTT_FOXO4_01	GGGTGGRR_PAX4_03	AACTTT_UNKNOWN
9315	C5orf13	chromosome 5 open reading frame 13		CTTTGT_LEF1_Q2	CAGGTG_E12_Q6		TTGTTT_FOXO4_01	GGGTGGRR_PAX4_03		TGGAAA_NFAT_Q4_01
56896	DPYSL5	dihydropyrimidinase-like 5		CTTTGT_LEF1_Q2	CAGGTG_E12_Q6		TTGTTT_FOXO4_01	GGGTGGRR_PAX4_03				GATTGGY_NFY_Q6_01
23199	KIAA0182	KIAA0182		CTTTGT_LEF1_Q2	CAGGTG_E12_Q6		TTGTTT_FOXO4_01	GGGTGGRR_PAX4_03
5569	PKIA	protein kinase (cAMP-dependent, catalytic) inhibitor alpha		CTTTGT_LEF1_Q2	CAGGTG_E12_Q6		TTGTTT_FOXO4_01	GGGTGGRR_PAX4_03
10371	SEMA3A	sema domain, immunoglobulin domain (Ig), short basic domain, secreted, (semaphorin) 3A		CTTTGT_LEF1_Q2	CAGGTG_E12_Q6		TTGTTT_FOXO4_01		AACTTT_UNKNOWN	TGGAAA_NFAT_Q4_01
5295	PIK3R1	phosphoinositide-3-kinase, regulatory subunit 1 (alpha)		CTTTGT_LEF1_Q2	CAGGTG_E12_Q6		TTGTTT_FOXO4_01		AACTTT_UNKNOWN			GATTGGY_NFY_Q6_01
23433	RHOQ	ras homolog gene family, member Q		CTTTGT_LEF1_Q2	CAGGTG_E12_Q6		TTGTTT_FOXO4_01		AACTTT_UNKNOWN			GATTGGY_NFY_Q6_01
121512	FGD4	FYVE, RhoGEF and PH domain containing 4		CTTTGT_LEF1_Q2	CAGGTG_E12_Q6		TTGTTT_FOXO4_01			TGGAAA_NFAT_Q4_01		GATTGGY_NFY_Q6_01
5156	PDGFRA	platelet-derived growth factor receptor, alpha polypeptide		CTTTGT_LEF1_Q2	CAGGTG_E12_Q6		TTGTTT_FOXO4_01			TGGAAA_NFAT_Q4_01
4974	OMG	oligodendrocyte myelin glycoprotein		CTTTGT_LEF1_Q2	CAGGTG_E12_Q6		TTGTTT_FOXO4_01				CAGCTG_AP4_Q5
5648	MASP1	mannan-binding lectin serine peptidase 1 (C4/C2 activating component of Ra-reactive factor)		CTTTGT_LEF1_Q2	CAGGTG_E12_Q6		TTGTTT_FOXO4_01				CAGCTG_AP4_Q5
25978	CHMP2B	charged multivesicular body protein 2B		CTTTGT_LEF1_Q2	CAGGTG_E12_Q6		TTGTTT_FOXO4_01					GATTGGY_NFY_Q6_01
57486	NLN	neurolysin (metallopeptidase M3 family)		CTTTGT_LEF1_Q2	CAGGTG_E12_Q6		TTGTTT_FOXO4_01
5064	PALM	paralemmin		CTTTGT_LEF1_Q2	CAGGTG_E12_Q6		TTGTTT_FOXO4_01
8631	SKAP1	src kinase associated phosphoprotein 1		CTTTGT_LEF1_Q2	CAGGTG_E12_Q6		TTGTTT_FOXO4_01
5293	PIK3CD	phosphoinositide-3-kinase, catalytic, delta polypeptide		CTTTGT_LEF1_Q2	CAGGTG_E12_Q6		TTGTTT_FOXO4_01
144348	ZNF664	zinc finger protein 664		CTTTGT_LEF1_Q2	CAGGTG_E12_Q6		TTGTTT_FOXO4_01
58528	RRAGD	Ras-related GTP binding D		CTTTGT_LEF1_Q2	CAGGTG_E12_Q6			GGGTGGRR_PAX4_03	AACTTT_UNKNOWN		CAGCTG_AP4_Q5
7483	WNT9A	wingless-type MMTV integration site family, member 9A		CTTTGT_LEF1_Q2	CAGGTG_E12_Q6			GGGTGGRR_PAX4_03			CAGCTG_AP4_Q5
56675	NRIP3	nuclear receptor interacting protein 3		CTTTGT_LEF1_Q2	CAGGTG_E12_Q6			GGGTGGRR_PAX4_03
10804	GJB6	gap junction protein, beta 6, 30kDa		CTTTGT_LEF1_Q2	CAGGTG_E12_Q6			GGGTGGRR_PAX4_03
57007	CXCR7	chemokine (C-X-C motif) receptor 7		CTTTGT_LEF1_Q2	CAGGTG_E12_Q6				AACTTT_UNKNOWN	TGGAAA_NFAT_Q4_01
8848	TSC22D1	TSC22 domain family, member 1		CTTTGT_LEF1_Q2	CAGGTG_E12_Q6				AACTTT_UNKNOWN			GATTGGY_NFY_Q6_01
1809	DPYSL3	dihydropyrimidinase-like 3		CTTTGT_LEF1_Q2	CAGGTG_E12_Q6				AACTTT_UNKNOWN
9886	RHOBTB1	Rho-related BTB domain containing 1		CTTTGT_LEF1_Q2	CAGGTG_E12_Q6				AACTTT_UNKNOWN
23231	SEL1L3	sel-1 suppressor of lin-12-like 3 (C. elegans)		CTTTGT_LEF1_Q2	CAGGTG_E12_Q6				AACTTT_UNKNOWN
1734	DIO2	deiodinase, iodothyronine, type II		CTTTGT_LEF1_Q2	CAGGTG_E12_Q6					TGGAAA_NFAT_Q4_01
166614	DCLK2	doublecortin-like kinase 2		CTTTGT_LEF1_Q2	CAGGTG_E12_Q6					TGGAAA_NFAT_Q4_01
4217	MAP3K5	mitogen-activated protein kinase kinase kinase 5		CTTTGT_LEF1_Q2	CAGGTG_E12_Q6						CAGCTG_AP4_Q5
169044	COL22A1	collagen, type XXII, alpha 1		CTTTGT_LEF1_Q2	CAGGTG_E12_Q6						CAGCTG_AP4_Q5
51319	RSRC1	arginine/serine-rich coiled-coil 1		CTTTGT_LEF1_Q2	CAGGTG_E12_Q6						CAGCTG_AP4_Q5
57144	PAK7	p21 protein (Cdc42/Rac)-activated kinase 7		CTTTGT_LEF1_Q2	CAGGTG_E12_Q6						CAGCTG_AP4_Q5
56139	PCDHA10	protocadherin alpha 10		CTTTGT_LEF1_Q2	CAGGTG_E12_Q6
4054	LTBP3	latent transforming growth factor beta binding protein 3		CTTTGT_LEF1_Q2	CAGGTG_E12_Q6
23769	FLRT1	fibronectin leucine rich transmembrane protein 1		CTTTGT_LEF1_Q2	CAGGTG_E12_Q6
51201	ZDHHC2	zinc finger, DHHC-type containing 2		CTTTGT_LEF1_Q2	CAGGTG_E12_Q6
11278	KLF12	Kruppel-like factor 12		CTTTGT_LEF1_Q2		GGGAGGRR_MAZ_Q6	TTGTTT_FOXO4_01	GGGTGGRR_PAX4_03	AACTTT_UNKNOWN	TGGAAA_NFAT_Q4_01	CAGCTG_AP4_Q5
1021	CDK6	cyclin-dependent kinase 6		CTTTGT_LEF1_Q2		GGGAGGRR_MAZ_Q6	TTGTTT_FOXO4_01	GGGTGGRR_PAX4_03	AACTTT_UNKNOWN	TGGAAA_NFAT_Q4_01
9874	TLK1	tousled-like kinase 1		CTTTGT_LEF1_Q2		GGGAGGRR_MAZ_Q6	TTGTTT_FOXO4_01	GGGTGGRR_PAX4_03	AACTTT_UNKNOWN
1641	DCX	doublecortin		CTTTGT_LEF1_Q2		GGGAGGRR_MAZ_Q6	TTGTTT_FOXO4_01	GGGTGGRR_PAX4_03			CAGCTG_AP4_Q5	GATTGGY_NFY_Q6_01
3181	HNRNPA2B1	heterogeneous nuclear ribonucleoprotein A2/B1		CTTTGT_LEF1_Q2		GGGAGGRR_MAZ_Q6	TTGTTT_FOXO4_01	GGGTGGRR_PAX4_03
9480	ONECUT2	one cut homeobox 2		CTTTGT_LEF1_Q2		GGGAGGRR_MAZ_Q6	TTGTTT_FOXO4_01		AACTTT_UNKNOWN		CAGCTG_AP4_Q5
9468	PCYT1B	phosphate cytidylyltransferase 1, choline, beta		CTTTGT_LEF1_Q2		GGGAGGRR_MAZ_Q6	TTGTTT_FOXO4_01				CAGCTG_AP4_Q5
2892	GRIA3	glutamate receptor, ionotrophic, AMPA 3		CTTTGT_LEF1_Q2		GGGAGGRR_MAZ_Q6		GGGTGGRR_PAX4_03	AACTTT_UNKNOWN	TGGAAA_NFAT_Q4_01		GATTGGY_NFY_Q6_01
5754	PTK7	PTK7 protein tyrosine kinase 7		CTTTGT_LEF1_Q2		GGGAGGRR_MAZ_Q6		GGGTGGRR_PAX4_03		TGGAAA_NFAT_Q4_01	CAGCTG_AP4_Q5
27316	RBMX	RNA binding motif protein, X-linked		CTTTGT_LEF1_Q2		GGGAGGRR_MAZ_Q6			AACTTT_UNKNOWN	TGGAAA_NFAT_Q4_01
60	ACTB	actin, beta		CTTTGT_LEF1_Q2		GGGAGGRR_MAZ_Q6			AACTTT_UNKNOWN		CAGCTG_AP4_Q5	GATTGGY_NFY_Q6_01
347733	TUBB2B	tubulin, beta 2B class IIb		CTTTGT_LEF1_Q2		GGGAGGRR_MAZ_Q6			AACTTT_UNKNOWN		CAGCTG_AP4_Q5	GATTGGY_NFY_Q6_01
5911	RAP2A	RAP2A, member of RAS oncogene family		CTTTGT_LEF1_Q2		GGGAGGRR_MAZ_Q6			AACTTT_UNKNOWN
27328	PCDH11X	protocadherin 11 X-linked		CTTTGT_LEF1_Q2		GGGAGGRR_MAZ_Q6			AACTTT_UNKNOWN
10096	ACTR3	ARP3 actin-related protein 3 homolog (yeast)		CTTTGT_LEF1_Q2		GGGAGGRR_MAZ_Q6			AACTTT_UNKNOWN
23543	RBFOX2	RNA binding protein, fox-1 homolog (C. elegans) 2		CTTTGT_LEF1_Q2		GGGAGGRR_MAZ_Q6				TGGAAA_NFAT_Q4_01	CAGCTG_AP4_Q5
56062	KLHL4	kelch-like 4 (Drosophila)		CTTTGT_LEF1_Q2		GGGAGGRR_MAZ_Q6				TGGAAA_NFAT_Q4_01		GATTGGY_NFY_Q6_01
53826	FXYD6	FXYD domain containing ion transport regulator 6		CTTTGT_LEF1_Q2		GGGAGGRR_MAZ_Q6				TGGAAA_NFAT_Q4_01
220992	ZNF485	zinc finger protein 485		CTTTGT_LEF1_Q2		GGGAGGRR_MAZ_Q6				TGGAAA_NFAT_Q4_01
6171	RPL41	ribosomal protein L41		CTTTGT_LEF1_Q2		GGGAGGRR_MAZ_Q6				TGGAAA_NFAT_Q4_01
309	ANXA6	annexin A6		CTTTGT_LEF1_Q2		GGGAGGRR_MAZ_Q6					CAGCTG_AP4_Q5	GATTGGY_NFY_Q6_01
4808	NHLH2	nescient helix loop helix 2		CTTTGT_LEF1_Q2		GGGAGGRR_MAZ_Q6					CAGCTG_AP4_Q5
7536	SF1	splicing factor 1		CTTTGT_LEF1_Q2		GGGAGGRR_MAZ_Q6						GATTGGY_NFY_Q6_01
7982	ST7	suppression of tumorigenicity 7		CTTTGT_LEF1_Q2		GGGAGGRR_MAZ_Q6						GATTGGY_NFY_Q6_01
4001	LMNB1	lamin B1		CTTTGT_LEF1_Q2		GGGAGGRR_MAZ_Q6
284161	GDPD1	glycerophosphodiester phosphodiesterase domain containing 1		CTTTGT_LEF1_Q2		GGGAGGRR_MAZ_Q6
53354	PANK1	pantothenate kinase 1		CTTTGT_LEF1_Q2		GGGAGGRR_MAZ_Q6
6319	SCD	stearoyl-CoA desaturase (delta-9-desaturase)		CTTTGT_LEF1_Q2		GGGAGGRR_MAZ_Q6
114990	VASN	vasorin		CTTTGT_LEF1_Q2		GGGAGGRR_MAZ_Q6
595	CCND1	cyclin D1		CTTTGT_LEF1_Q2		GGGAGGRR_MAZ_Q6
1301	COL11A1	collagen, type XI, alpha 1		CTTTGT_LEF1_Q2		GGGAGGRR_MAZ_Q6
2585	GALK2	galactokinase 2		CTTTGT_LEF1_Q2		GGGAGGRR_MAZ_Q6
51320	MEX3C	mex-3 homolog C (C. elegans)		CTTTGT_LEF1_Q2		GGGAGGRR_MAZ_Q6
8728	ADAM19	ADAM metallopeptidase domain 19		CTTTGT_LEF1_Q2		GGGAGGRR_MAZ_Q6
23168	RTF1	Rtf1, Paf1/RNA polymerase II complex component, homolog (S. cerevisiae)		CTTTGT_LEF1_Q2		GGGAGGRR_MAZ_Q6
11279	KLF8	Kruppel-like factor 8		CTTTGT_LEF1_Q2			TTGTTT_FOXO4_01	GGGTGGRR_PAX4_03	AACTTT_UNKNOWN	TGGAAA_NFAT_Q4_01	CAGCTG_AP4_Q5
7224	TRPC5	transient receptor potential cation channel, subfamily C, member 5		CTTTGT_LEF1_Q2			TTGTTT_FOXO4_01	GGGTGGRR_PAX4_03	AACTTT_UNKNOWN
23462	HEY1	hairy/enhancer-of-split related with YRPW motif 1		CTTTGT_LEF1_Q2			TTGTTT_FOXO4_01	GGGTGGRR_PAX4_03
51274	KLF3	Kruppel-like factor 3 (basic)		CTTTGT_LEF1_Q2			TTGTTT_FOXO4_01	GGGTGGRR_PAX4_03
84631	SLITRK2	SLIT and NTRK-like family, member 2		CTTTGT_LEF1_Q2			TTGTTT_FOXO4_01	GGGTGGRR_PAX4_03
6016	RIT1	Ras-like without CAAX 1		CTTTGT_LEF1_Q2			TTGTTT_FOXO4_01		AACTTT_UNKNOWN	TGGAAA_NFAT_Q4_01	CAGCTG_AP4_Q5
9079	LDB2	LIM domain binding 2		CTTTGT_LEF1_Q2			TTGTTT_FOXO4_01		AACTTT_UNKNOWN	TGGAAA_NFAT_Q4_01		GATTGGY_NFY_Q6_01
5144	PDE4D	phosphodiesterase 4D, cAMP-specific		CTTTGT_LEF1_Q2			TTGTTT_FOXO4_01		AACTTT_UNKNOWN	TGGAAA_NFAT_Q4_01
151887	CCDC80	coiled-coil domain containing 80		CTTTGT_LEF1_Q2			TTGTTT_FOXO4_01		AACTTT_UNKNOWN	TGGAAA_NFAT_Q4_01
5150	PDE7A	phosphodiesterase 7A		CTTTGT_LEF1_Q2			TTGTTT_FOXO4_01		AACTTT_UNKNOWN		CAGCTG_AP4_Q5
23012	STK38L	serine/threonine kinase 38 like		CTTTGT_LEF1_Q2			TTGTTT_FOXO4_01		AACTTT_UNKNOWN
256130	TMEM196	transmembrane protein 196		CTTTGT_LEF1_Q2			TTGTTT_FOXO4_01		AACTTT_UNKNOWN
5908	RAP1B	RAP1B, member of RAS oncogene family		CTTTGT_LEF1_Q2			TTGTTT_FOXO4_01		AACTTT_UNKNOWN
4978	OPCML	opioid binding protein/cell adhesion molecule-like		CTTTGT_LEF1_Q2			TTGTTT_FOXO4_01			TGGAAA_NFAT_Q4_01	CAGCTG_AP4_Q5
7552	ZNF711	zinc finger protein 711		CTTTGT_LEF1_Q2			TTGTTT_FOXO4_01			TGGAAA_NFAT_Q4_01		GATTGGY_NFY_Q6_01
85465	EPT1	ethanolaminephosphotransferase 1 (CDP-ethanolamine-specific)		CTTTGT_LEF1_Q2			TTGTTT_FOXO4_01			TGGAAA_NFAT_Q4_01
6328	SCN3A	sodium channel, voltage-gated, type III, alpha subunit		CTTTGT_LEF1_Q2			TTGTTT_FOXO4_01			TGGAAA_NFAT_Q4_01
65244	SPATS2	spermatogenesis associated, serine-rich 2		CTTTGT_LEF1_Q2			TTGTTT_FOXO4_01			TGGAAA_NFAT_Q4_01
1397	CRIP2	cysteine-rich protein 2		CTTTGT_LEF1_Q2			TTGTTT_FOXO4_01				CAGCTG_AP4_Q5
90957	DHX57	DEAH (Asp-Glu-Ala-Asp/His) box polypeptide 57		CTTTGT_LEF1_Q2			TTGTTT_FOXO4_01					GATTGGY_NFY_Q6_01
6480	ST6GAL1	ST6 beta-galactosamide alpha-2,6-sialyltranferase 1		CTTTGT_LEF1_Q2			TTGTTT_FOXO4_01
128338	DRAM2	DNA-damage regulated autophagy modulator 2		CTTTGT_LEF1_Q2			TTGTTT_FOXO4_01
2791	GNG11	guanine nucleotide binding protein (G protein), gamma 11		CTTTGT_LEF1_Q2			TTGTTT_FOXO4_01
55013	CCDC109B	coiled-coil domain containing 109B		CTTTGT_LEF1_Q2			TTGTTT_FOXO4_01
2745	GLRX	glutaredoxin (thioltransferase)		CTTTGT_LEF1_Q2			TTGTTT_FOXO4_01
10750	GRAP	GRB2-related adaptor protein		CTTTGT_LEF1_Q2			TTGTTT_FOXO4_01
22907	DHX30	DEAH (Asp-Glu-Ala-His) box polypeptide 30		CTTTGT_LEF1_Q2			TTGTTT_FOXO4_01
10018	BCL2L11	BCL2-like 11 (apoptosis facilitator)		CTTTGT_LEF1_Q2			TTGTTT_FOXO4_01
55884	WSB2	WD repeat and SOCS box containing 2		CTTTGT_LEF1_Q2			TTGTTT_FOXO4_01
2835	GPR12	G protein-coupled receptor 12		CTTTGT_LEF1_Q2			TTGTTT_FOXO4_01
83856	FSD1L	fibronectin type III and SPRY domain containing 1-like		CTTTGT_LEF1_Q2			TTGTTT_FOXO4_01
3796	KIF2A	kinesin heavy chain member 2A		CTTTGT_LEF1_Q2			TTGTTT_FOXO4_01
54329	GPR85	G protein-coupled receptor 85		CTTTGT_LEF1_Q2				GGGTGGRR_PAX4_03	AACTTT_UNKNOWN	TGGAAA_NFAT_Q4_01		GATTGGY_NFY_Q6_01
27255	CNTN6	contactin 6		CTTTGT_LEF1_Q2				GGGTGGRR_PAX4_03	AACTTT_UNKNOWN		CAGCTG_AP4_Q5
55122	AKIRIN2	akirin 2		CTTTGT_LEF1_Q2				GGGTGGRR_PAX4_03	AACTTT_UNKNOWN			GATTGGY_NFY_Q6_01
10160	FARP1	FERM, RhoGEF (ARHGEF) and pleckstrin domain protein 1 (chondrocyte-derived)		CTTTGT_LEF1_Q2				GGGTGGRR_PAX4_03	AACTTT_UNKNOWN
1964	EIF1AX	eukaryotic translation initiation factor 1A, X-linked		CTTTGT_LEF1_Q2				GGGTGGRR_PAX4_03	AACTTT_UNKNOWN
283383	GPR133	G protein-coupled receptor 133		CTTTGT_LEF1_Q2				GGGTGGRR_PAX4_03	AACTTT_UNKNOWN
51291	GMIP	GEM interacting protein		CTTTGT_LEF1_Q2				GGGTGGRR_PAX4_03		TGGAAA_NFAT_Q4_01
8405	SPOP	speckle-type POZ protein		CTTTGT_LEF1_Q2				GGGTGGRR_PAX4_03			CAGCTG_AP4_Q5
84206	MEX3B	mex-3 homolog B (C. elegans)		CTTTGT_LEF1_Q2				GGGTGGRR_PAX4_03
6916	TBXAS1	thromboxane A synthase 1 (platelet)		CTTTGT_LEF1_Q2					AACTTT_UNKNOWN	TGGAAA_NFAT_Q4_01
2255	FGF10	fibroblast growth factor 10		CTTTGT_LEF1_Q2					AACTTT_UNKNOWN	TGGAAA_NFAT_Q4_01
114788	CSMD3	CUB and Sushi multiple domains 3		CTTTGT_LEF1_Q2					AACTTT_UNKNOWN		CAGCTG_AP4_Q5
7804	LRP8	low density lipoprotein receptor-related protein 8, apolipoprotein e receptor		CTTTGT_LEF1_Q2					AACTTT_UNKNOWN			GATTGGY_NFY_Q6_01
53358	SHC3	SHC (Src homology 2 domain containing) transforming protein 3		CTTTGT_LEF1_Q2					AACTTT_UNKNOWN			GATTGGY_NFY_Q6_01
10668	CGRRF1	cell growth regulator with ring finger domain 1		CTTTGT_LEF1_Q2					AACTTT_UNKNOWN			GATTGGY_NFY_Q6_01
3482	IGF2R	insulin-like growth factor 2 receptor		CTTTGT_LEF1_Q2					AACTTT_UNKNOWN
2697	GJA1	gap junction protein, alpha 1, 43kDa		CTTTGT_LEF1_Q2					AACTTT_UNKNOWN
10409	BASP1	brain abundant, membrane attached signal protein 1		CTTTGT_LEF1_Q2					AACTTT_UNKNOWN
54462	FAM190B	family with sequence similarity 190, member B		CTTTGT_LEF1_Q2					AACTTT_UNKNOWN
131096	KCNH8	potassium voltage-gated channel, subfamily H (eag-related), member 8		CTTTGT_LEF1_Q2					AACTTT_UNKNOWN
64282	PAPD5	PAP associated domain containing 5		CTTTGT_LEF1_Q2					AACTTT_UNKNOWN
5600	MAPK11	mitogen-activated protein kinase 11		CTTTGT_LEF1_Q2					AACTTT_UNKNOWN
126626	GABPB2	GA binding protein transcription factor, beta subunit 2		CTTTGT_LEF1_Q2						TGGAAA_NFAT_Q4_01	CAGCTG_AP4_Q5
2103	ESRRB	estrogen-related receptor beta		CTTTGT_LEF1_Q2						TGGAAA_NFAT_Q4_01	CAGCTG_AP4_Q5
29094	LGALSL	lectin, galactoside-binding-like		CTTTGT_LEF1_Q2						TGGAAA_NFAT_Q4_01		GATTGGY_NFY_Q6_01
666	BOK	BCL2-related ovarian killer		CTTTGT_LEF1_Q2						TGGAAA_NFAT_Q4_01
7345	UCHL1	ubiquitin carboxyl-terminal esterase L1 (ubiquitin thiolesterase)		CTTTGT_LEF1_Q2						TGGAAA_NFAT_Q4_01
3914	LAMB3	laminin, beta 3		CTTTGT_LEF1_Q2						TGGAAA_NFAT_Q4_01
2651	GCNT2	glucosaminyl (N-acetyl) transferase 2, I-branching enzyme (I blood group)		CTTTGT_LEF1_Q2						TGGAAA_NFAT_Q4_01
55297	CCDC91	coiled-coil domain containing 91		CTTTGT_LEF1_Q2						TGGAAA_NFAT_Q4_01
2331	FMOD	fibromodulin		CTTTGT_LEF1_Q2						TGGAAA_NFAT_Q4_01
7168	TPM1	tropomyosin 1 (alpha)		CTTTGT_LEF1_Q2						TGGAAA_NFAT_Q4_01
22902	RUFY3	RUN and FYVE domain containing 3		CTTTGT_LEF1_Q2							CAGCTG_AP4_Q5	GATTGGY_NFY_Q6_01
3897	L1CAM	L1 cell adhesion molecule		CTTTGT_LEF1_Q2							CAGCTG_AP4_Q5
571	BACH1	BTB and CNC homology 1, basic leucine zipper transcription factor 1		CTTTGT_LEF1_Q2							CAGCTG_AP4_Q5
1036	CDO1	cysteine dioxygenase, type I		CTTTGT_LEF1_Q2							CAGCTG_AP4_Q5
468	ATF4	activating transcription factor 4 (tax-responsive enhancer element B67)		CTTTGT_LEF1_Q2								GATTGGY_NFY_Q6_01
284325	C19orf54	chromosome 19 open reading frame 54		CTTTGT_LEF1_Q2								GATTGGY_NFY_Q6_01
121601	ANO4	anoctamin 4		CTTTGT_LEF1_Q2								GATTGGY_NFY_Q6_01
26136	TES	testis derived transcript (3 LIM domains)		CTTTGT_LEF1_Q2								GATTGGY_NFY_Q6_01
29128	UHRF1	ubiquitin-like with PHD and ring finger domains 1		CTTTGT_LEF1_Q2								GATTGGY_NFY_Q6_01
26502	NARF	nuclear prelamin A recognition factor		CTTTGT_LEF1_Q2								GATTGGY_NFY_Q6_01
1063	CENPF	centromere protein F, 350/400kDa (mitosin)		CTTTGT_LEF1_Q2								GATTGGY_NFY_Q6_01
10325	RRAGB	Ras-related GTP binding B		CTTTGT_LEF1_Q2
22836	RHOBTB3	Rho-related BTB domain containing 3		CTTTGT_LEF1_Q2
328	APEX1	APEX nuclease (multifunctional DNA repair enzyme) 1		CTTTGT_LEF1_Q2
22846	VASH1	vasohibin 1		CTTTGT_LEF1_Q2
84376	HOOK3	hook homolog 3 (Drosophila)		CTTTGT_LEF1_Q2
51194	IPO11	importin 11		CTTTGT_LEF1_Q2
6993	DYNLT1	dynein, light chain, Tctex-type 1		CTTTGT_LEF1_Q2
164045	HFM1	HFM1, ATP-dependent DNA helicase homolog (S. cerevisiae)		CTTTGT_LEF1_Q2
7533	YWHAH	tyrosine 3-monooxygenase/tryptophan 5-monooxygenase activation protein, eta polypeptide		CTTTGT_LEF1_Q2
6157	RPL27A	ribosomal protein L27a		CTTTGT_LEF1_Q2
390	RND3	Rho family GTPase 3		CTTTGT_LEF1_Q2
6047	RNF4	ring finger protein 4		CTTTGT_LEF1_Q2
163	AP2B1	adaptor-related protein complex 2, beta 1 subunit		CTTTGT_LEF1_Q2
55558	PLXNA3	plexin A3		CTTTGT_LEF1_Q2
4133	MAP2	microtubule-associated protein 2		CTTTGT_LEF1_Q2
55285	RBM41	RNA binding motif protein 41		CTTTGT_LEF1_Q2
4233	MET	met proto-oncogene (hepatocyte growth factor receptor)		CTTTGT_LEF1_Q2
10477	UBE2E3	ubiquitin-conjugating enzyme E2E 3		CTTTGT_LEF1_Q2
91050	CCDC149	coiled-coil domain containing 149		CTTTGT_LEF1_Q2
132014	IL17RE	interleukin 17 receptor E		CTTTGT_LEF1_Q2
55717	WDR11	WD repeat domain 11		CTTTGT_LEF1_Q2
51143	DYNC1LI1	dynein, cytoplasmic 1, light intermediate chain 1		CTTTGT_LEF1_Q2
904	CCNT1	cyclin T1		CTTTGT_LEF1_Q2
64116	SLC39A8	solute carrier family 39 (zinc transporter), member 8		CTTTGT_LEF1_Q2
50801	KCNK4	potassium channel, subfamily K, member 4		CTTTGT_LEF1_Q2
1781	DYNC1I2	dynein, cytoplasmic 1, intermediate chain 2		CTTTGT_LEF1_Q2
64805	P2RY12	purinergic receptor P2Y, G-protein coupled, 12		CTTTGT_LEF1_Q2
6428	SRSF3	serine/arginine-rich splicing factor 3		CTTTGT_LEF1_Q2
2632	GBE1	glucan (1,4-alpha-), branching enzyme 1		CTTTGT_LEF1_Q2
79897	RPP21	ribonuclease P/MRP 21kDa subunit		CTTTGT_LEF1_Q2
7993	UBXN8	UBX domain protein 8		CTTTGT_LEF1_Q2
1306	COL15A1	collagen, type XV, alpha 1		CTTTGT_LEF1_Q2
203068	TUBB	tubulin, beta class I		CTTTGT_LEF1_Q2
51046	ST8SIA3	ST8 alpha-N-acetyl-neuraminide alpha-2,8-sialyltransferase 3		CTTTGT_LEF1_Q2
3625	INHBB	inhibin, beta B		CTTTGT_LEF1_Q2
998	CDC42	cell division cycle 42 (GTP binding protein, 25kDa)		CTTTGT_LEF1_Q2
29114	TAGLN3	transgelin 3		CTTTGT_LEF1_Q2
85300	ATCAY	ataxia, cerebellar, Cayman type		CTTTGT_LEF1_Q2
29767	TMOD2	tropomodulin 2 (neuronal)		CTTTGT_LEF1_Q2
79630	C1orf54	chromosome 1 open reading frame 54		CTTTGT_LEF1_Q2
7329	UBE2I	ubiquitin-conjugating enzyme E2I		CTTTGT_LEF1_Q2
125058	TBC1D16	TBC1 domain family, member 16		CTTTGT_LEF1_Q2
9465	AKAP7	A kinase (PRKA) anchor protein 7		CTTTGT_LEF1_Q2
55529	TMEM55A	transmembrane protein 55A		CTTTGT_LEF1_Q2
24147	FJX1	four jointed box 1 (Drosophila)		CTTTGT_LEF1_Q2
89857	KLHL6	kelch-like 6 (Drosophila)		CTTTGT_LEF1_Q2
205147	FAM123C	family with sequence similarity 123C		CTTTGT_LEF1_Q2
116228	FAM36A	family with sequence similarity 36, member A		CTTTGT_LEF1_Q2
147949	ZNF583	zinc finger protein 583		CTTTGT_LEF1_Q2
199857	ALG14	asparagine-linked glycosylation 14 homolog (S. cerevisiae)		CTTTGT_LEF1_Q2
2512	FTL	ferritin, light polypeptide		CTTTGT_LEF1_Q2
27065	D4S234E	DNA segment on chromosome 4 (unique) 234 expressed sequence		CTTTGT_LEF1_Q2
2831	NPBWR1	neuropeptides B/W receptor 1		CTTTGT_LEF1_Q2
2775	GNAO1	guanine nucleotide binding protein (G protein), alpha activating activity polypeptide O			CAGGTG_E12_Q6	GGGAGGRR_MAZ_Q6	TTGTTT_FOXO4_01	GGGTGGRR_PAX4_03		TGGAAA_NFAT_Q4_01
6093	ROCK1	Rho-associated, coiled-coil containing protein kinase 1			CAGGTG_E12_Q6	GGGAGGRR_MAZ_Q6	TTGTTT_FOXO4_01	GGGTGGRR_PAX4_03			CAGCTG_AP4_Q5
2258	FGF13	fibroblast growth factor 13			CAGGTG_E12_Q6	GGGAGGRR_MAZ_Q6	TTGTTT_FOXO4_01		AACTTT_UNKNOWN	TGGAAA_NFAT_Q4_01	CAGCTG_AP4_Q5
4862	NPAS2	neuronal PAS domain protein 2			CAGGTG_E12_Q6	GGGAGGRR_MAZ_Q6	TTGTTT_FOXO4_01		AACTTT_UNKNOWN	TGGAAA_NFAT_Q4_01
9120	SLC16A6	solute carrier family 16, member 6 (monocarboxylic acid transporter 7)			CAGGTG_E12_Q6	GGGAGGRR_MAZ_Q6	TTGTTT_FOXO4_01		AACTTT_UNKNOWN	TGGAAA_NFAT_Q4_01
79145	CHCHD7	coiled-coil-helix-coiled-coil-helix domain containing 7			CAGGTG_E12_Q6	GGGAGGRR_MAZ_Q6	TTGTTT_FOXO4_01		AACTTT_UNKNOWN	TGGAAA_NFAT_Q4_01
83698	CALN1	calneuron 1			CAGGTG_E12_Q6	GGGAGGRR_MAZ_Q6	TTGTTT_FOXO4_01		AACTTT_UNKNOWN
5063	PAK3	p21 protein (Cdc42/Rac)-activated kinase 3			CAGGTG_E12_Q6	GGGAGGRR_MAZ_Q6	TTGTTT_FOXO4_01			TGGAAA_NFAT_Q4_01	CAGCTG_AP4_Q5	GATTGGY_NFY_Q6_01
9686	VGLL4	vestigial like 4 (Drosophila)			CAGGTG_E12_Q6	GGGAGGRR_MAZ_Q6	TTGTTT_FOXO4_01			TGGAAA_NFAT_Q4_01
357	SHROOM2	shroom family member 2			CAGGTG_E12_Q6	GGGAGGRR_MAZ_Q6	TTGTTT_FOXO4_01
22865	SLITRK3	SLIT and NTRK-like family, member 3			CAGGTG_E12_Q6	GGGAGGRR_MAZ_Q6		GGGTGGRR_PAX4_03	AACTTT_UNKNOWN	TGGAAA_NFAT_Q4_01
6935	ZEB1	zinc finger E-box binding homeobox 1			CAGGTG_E12_Q6	GGGAGGRR_MAZ_Q6		GGGTGGRR_PAX4_03	AACTTT_UNKNOWN
4685	NCAM2	neural cell adhesion molecule 2			CAGGTG_E12_Q6	GGGAGGRR_MAZ_Q6		GGGTGGRR_PAX4_03	AACTTT_UNKNOWN
2596	GAP43	growth associated protein 43			CAGGTG_E12_Q6	GGGAGGRR_MAZ_Q6		GGGTGGRR_PAX4_03		TGGAAA_NFAT_Q4_01	CAGCTG_AP4_Q5
81848	SPRY4	sprouty homolog 4 (Drosophila)			CAGGTG_E12_Q6	GGGAGGRR_MAZ_Q6		GGGTGGRR_PAX4_03			CAGCTG_AP4_Q5
55800	SCN3B	sodium channel, voltage-gated, type III, beta			CAGGTG_E12_Q6	GGGAGGRR_MAZ_Q6		GGGTGGRR_PAX4_03			CAGCTG_AP4_Q5
256472	TMEM151A	transmembrane protein 151A			CAGGTG_E12_Q6	GGGAGGRR_MAZ_Q6		GGGTGGRR_PAX4_03
55565	ZNF821	zinc finger protein 821			CAGGTG_E12_Q6	GGGAGGRR_MAZ_Q6		GGGTGGRR_PAX4_03
261734	NPHP4	nephronophthisis 4			CAGGTG_E12_Q6	GGGAGGRR_MAZ_Q6			AACTTT_UNKNOWN	TGGAAA_NFAT_Q4_01	CAGCTG_AP4_Q5	GATTGGY_NFY_Q6_01
22941	SHANK2	SH3 and multiple ankyrin repeat domains 2			CAGGTG_E12_Q6	GGGAGGRR_MAZ_Q6			AACTTT_UNKNOWN	TGGAAA_NFAT_Q4_01
57282	SLC4A10	solute carrier family 4, sodium bicarbonate transporter, member 10			CAGGTG_E12_Q6	GGGAGGRR_MAZ_Q6			AACTTT_UNKNOWN
64651	CSRNP1	cysteine-serine-rich nuclear protein 1			CAGGTG_E12_Q6	GGGAGGRR_MAZ_Q6			AACTTT_UNKNOWN
84668	FAM126A	family with sequence similarity 126, member A			CAGGTG_E12_Q6	GGGAGGRR_MAZ_Q6			AACTTT_UNKNOWN
221895	JAZF1	JAZF zinc finger 1			CAGGTG_E12_Q6	GGGAGGRR_MAZ_Q6			AACTTT_UNKNOWN
6097	RORC	RAR-related orphan receptor C			CAGGTG_E12_Q6	GGGAGGRR_MAZ_Q6				TGGAAA_NFAT_Q4_01	CAGCTG_AP4_Q5	GATTGGY_NFY_Q6_01
818	CAMK2G	calcium/calmodulin-dependent protein kinase II gamma			CAGGTG_E12_Q6	GGGAGGRR_MAZ_Q6				TGGAAA_NFAT_Q4_01	CAGCTG_AP4_Q5
1025	CDK9	cyclin-dependent kinase 9			CAGGTG_E12_Q6	GGGAGGRR_MAZ_Q6				TGGAAA_NFAT_Q4_01
6337	SCNN1A	sodium channel, nonvoltage-gated 1 alpha			CAGGTG_E12_Q6	GGGAGGRR_MAZ_Q6				TGGAAA_NFAT_Q4_01
6000	RGS7	regulator of G-protein signaling 7			CAGGTG_E12_Q6	GGGAGGRR_MAZ_Q6					CAGCTG_AP4_Q5
6820	SULT2B1	sulfotransferase family, cytosolic, 2B, member 1			CAGGTG_E12_Q6	GGGAGGRR_MAZ_Q6					CAGCTG_AP4_Q5
84265	POLR3GL	polymerase (RNA) III (DNA directed) polypeptide G (32kD)-like			CAGGTG_E12_Q6	GGGAGGRR_MAZ_Q6					CAGCTG_AP4_Q5
340348	TSPAN33	tetraspanin 33			CAGGTG_E12_Q6	GGGAGGRR_MAZ_Q6					CAGCTG_AP4_Q5
170689	ADAMTS15	ADAM metallopeptidase with thrombospondin type 1 motif, 15			CAGGTG_E12_Q6	GGGAGGRR_MAZ_Q6						GATTGGY_NFY_Q6_01
2224	FDPS	farnesyl diphosphate synthase			CAGGTG_E12_Q6	GGGAGGRR_MAZ_Q6						GATTGGY_NFY_Q6_01
226	ALDOA	aldolase A, fructose-bisphosphate			CAGGTG_E12_Q6	GGGAGGRR_MAZ_Q6
29903	CCDC106	coiled-coil domain containing 106			CAGGTG_E12_Q6	GGGAGGRR_MAZ_Q6
53834	FGFRL1	fibroblast growth factor receptor-like 1			CAGGTG_E12_Q6	GGGAGGRR_MAZ_Q6
27092	CACNG4	calcium channel, voltage-dependent, gamma subunit 4			CAGGTG_E12_Q6	GGGAGGRR_MAZ_Q6
4324	MMP15	matrix metallopeptidase 15 (membrane-inserted)			CAGGTG_E12_Q6	GGGAGGRR_MAZ_Q6
2582	GALE	UDP-galactose-4-epimerase			CAGGTG_E12_Q6	GGGAGGRR_MAZ_Q6
5498	PPOX	protoporphyrinogen oxidase			CAGGTG_E12_Q6	GGGAGGRR_MAZ_Q6
64772	ENGASE	endo-beta-N-acetylglucosaminidase			CAGGTG_E12_Q6	GGGAGGRR_MAZ_Q6
80320	SP6	Sp6 transcription factor			CAGGTG_E12_Q6	GGGAGGRR_MAZ_Q6
10712	FAM189B	family with sequence similarity 189, member B			CAGGTG_E12_Q6	GGGAGGRR_MAZ_Q6
79147	FKRP	fukutin related protein			CAGGTG_E12_Q6	GGGAGGRR_MAZ_Q6
84230	LRRC8C	leucine rich repeat containing 8 family, member C			CAGGTG_E12_Q6	GGGAGGRR_MAZ_Q6
139728	PNCK	pregnancy up-regulated non-ubiquitously expressed CaM kinase			CAGGTG_E12_Q6	GGGAGGRR_MAZ_Q6
639	PRDM1	PR domain containing 1, with ZNF domain			CAGGTG_E12_Q6		TTGTTT_FOXO4_01	GGGTGGRR_PAX4_03	AACTTT_UNKNOWN	TGGAAA_NFAT_Q4_01
8554	PIAS1	protein inhibitor of activated STAT, 1			CAGGTG_E12_Q6		TTGTTT_FOXO4_01	GGGTGGRR_PAX4_03	AACTTT_UNKNOWN
151835	CPNE9	copine family member IX			CAGGTG_E12_Q6		TTGTTT_FOXO4_01	GGGTGGRR_PAX4_03	AACTTT_UNKNOWN
8857	FCGBP	Fc fragment of IgG binding protein			CAGGTG_E12_Q6		TTGTTT_FOXO4_01	GGGTGGRR_PAX4_03			CAGCTG_AP4_Q5
51617	HMP19	HMP19 protein			CAGGTG_E12_Q6		TTGTTT_FOXO4_01		AACTTT_UNKNOWN	TGGAAA_NFAT_Q4_01	CAGCTG_AP4_Q5
51422	PRKAG2	protein kinase, AMP-activated, gamma 2 non-catalytic subunit			CAGGTG_E12_Q6		TTGTTT_FOXO4_01		AACTTT_UNKNOWN	TGGAAA_NFAT_Q4_01
2182	ACSL4	acyl-CoA synthetase long-chain family member 4			CAGGTG_E12_Q6		TTGTTT_FOXO4_01		AACTTT_UNKNOWN		CAGCTG_AP4_Q5
4885	NPTX2	neuronal pentraxin II			CAGGTG_E12_Q6		TTGTTT_FOXO4_01		AACTTT_UNKNOWN			GATTGGY_NFY_Q6_01
2114	ETS2	v-ets erythroblastosis virus E26 oncogene homolog 2 (avian)			CAGGTG_E12_Q6		TTGTTT_FOXO4_01			TGGAAA_NFAT_Q4_01
10991	SLC38A3	solute carrier family 38, member 3			CAGGTG_E12_Q6		TTGTTT_FOXO4_01				CAGCTG_AP4_Q5
257068	PLCXD2	phosphatidylinositol-specific phospholipase C, X domain containing 2			CAGGTG_E12_Q6		TTGTTT_FOXO4_01					GATTGGY_NFY_Q6_01
151126	ZNF385B	zinc finger protein 385B			CAGGTG_E12_Q6		TTGTTT_FOXO4_01					GATTGGY_NFY_Q6_01
3918	LAMC2	laminin, gamma 2			CAGGTG_E12_Q6		TTGTTT_FOXO4_01
163486	DENND1B	DENN/MADD domain containing 1B			CAGGTG_E12_Q6		TTGTTT_FOXO4_01
407738	FAM19A1	family with sequence similarity 19 (chemokine (C-C motif)-like), member A1			CAGGTG_E12_Q6			GGGTGGRR_PAX4_03	AACTTT_UNKNOWN	TGGAAA_NFAT_Q4_01
3659	IRF1	interferon regulatory factor 1			CAGGTG_E12_Q6			GGGTGGRR_PAX4_03	AACTTT_UNKNOWN
90134	KCNH7	potassium voltage-gated channel, subfamily H (eag-related), member 7			CAGGTG_E12_Q6			GGGTGGRR_PAX4_03		TGGAAA_NFAT_Q4_01
54414	SIAE	sialic acid acetylesterase			CAGGTG_E12_Q6			GGGTGGRR_PAX4_03		TGGAAA_NFAT_Q4_01
7277	TUBA4A	tubulin, alpha 4a			CAGGTG_E12_Q6			GGGTGGRR_PAX4_03			CAGCTG_AP4_Q5
3782	KCNN3	potassium intermediate/small conductance calcium-activated channel, subfamily N, member 3			CAGGTG_E12_Q6			GGGTGGRR_PAX4_03			CAGCTG_AP4_Q5
6422	SFRP1	secreted frizzled-related protein 1			CAGGTG_E12_Q6			GGGTGGRR_PAX4_03				GATTGGY_NFY_Q6_01
5935	RBM3	RNA binding motif (RNP1, RRM) protein 3			CAGGTG_E12_Q6			GGGTGGRR_PAX4_03
2039	EPB49	erythrocyte membrane protein band 4.9 (dematin)			CAGGTG_E12_Q6			GGGTGGRR_PAX4_03
5355	PLP2	proteolipid protein 2 (colonic epithelium-enriched)			CAGGTG_E12_Q6			GGGTGGRR_PAX4_03
5034	P4HB	prolyl 4-hydroxylase, beta polypeptide			CAGGTG_E12_Q6			GGGTGGRR_PAX4_03
170463	SSBP4	single stranded DNA binding protein 4			CAGGTG_E12_Q6			GGGTGGRR_PAX4_03
4856	NOV	nephroblastoma overexpressed gene			CAGGTG_E12_Q6			GGGTGGRR_PAX4_03
1839	HBEGF	heparin-binding EGF-like growth factor			CAGGTG_E12_Q6			GGGTGGRR_PAX4_03
257194	NEGR1	neuronal growth regulator 1			CAGGTG_E12_Q6			GGGTGGRR_PAX4_03
2876	GPX1	glutathione peroxidase 1			CAGGTG_E12_Q6				AACTTT_UNKNOWN	TGGAAA_NFAT_Q4_01	CAGCTG_AP4_Q5
1950	EGF	epidermal growth factor			CAGGTG_E12_Q6				AACTTT_UNKNOWN	TGGAAA_NFAT_Q4_01
57118	CAMK1D	calcium/calmodulin-dependent protein kinase ID			CAGGTG_E12_Q6				AACTTT_UNKNOWN
55857	PLK1S1	polo-like kinase 1 substrate 1			CAGGTG_E12_Q6				AACTTT_UNKNOWN
116984	ARAP2	ArfGAP with RhoGAP domain, ankyrin repeat and PH domain 2			CAGGTG_E12_Q6				AACTTT_UNKNOWN
9397	NMT2	N-myristoyltransferase 2			CAGGTG_E12_Q6				AACTTT_UNKNOWN
81553	FAM49A	family with sequence similarity 49, member A			CAGGTG_E12_Q6				AACTTT_UNKNOWN
148	ADRA1A	adrenergic, alpha-1A-, receptor			CAGGTG_E12_Q6				AACTTT_UNKNOWN
57522	SRGAP1	SLIT-ROBO Rho GTPase activating protein 1			CAGGTG_E12_Q6				AACTTT_UNKNOWN
5905	RANGAP1	Ran GTPase activating protein 1			CAGGTG_E12_Q6				AACTTT_UNKNOWN
26297	SERGEF	secretion regulating guanine nucleotide exchange factor			CAGGTG_E12_Q6				AACTTT_UNKNOWN
753	C18orf1	chromosome 18 open reading frame 1			CAGGTG_E12_Q6					TGGAAA_NFAT_Q4_01	CAGCTG_AP4_Q5
11034	DSTN	destrin (actin depolymerizing factor)			CAGGTG_E12_Q6					TGGAAA_NFAT_Q4_01		GATTGGY_NFY_Q6_01
4591	TRIM37	tripartite motif containing 37			CAGGTG_E12_Q6					TGGAAA_NFAT_Q4_01
25897	RNF19A	ring finger protein 19A			CAGGTG_E12_Q6					TGGAAA_NFAT_Q4_01
4005	LMO2	LIM domain only 2 (rhombotin-like 1)			CAGGTG_E12_Q6					TGGAAA_NFAT_Q4_01
29803	REPIN1	replication initiator 1			CAGGTG_E12_Q6					TGGAAA_NFAT_Q4_01
1384	CRAT	carnitine O-acetyltransferase			CAGGTG_E12_Q6					TGGAAA_NFAT_Q4_01
4023	LPL	lipoprotein lipase			CAGGTG_E12_Q6					TGGAAA_NFAT_Q4_01
9334	B4GALT5	UDP-Gal:betaGlcNAc beta 1,4- galactosyltransferase, polypeptide 5			CAGGTG_E12_Q6					TGGAAA_NFAT_Q4_01
53942	CNTN5	contactin 5			CAGGTG_E12_Q6					TGGAAA_NFAT_Q4_01
90668	LRRC16B	leucine rich repeat containing 16B			CAGGTG_E12_Q6						CAGCTG_AP4_Q5
1821	DRP2	dystrophin related protein 2			CAGGTG_E12_Q6						CAGCTG_AP4_Q5
84958	SYTL1	synaptotagmin-like 1			CAGGTG_E12_Q6						CAGCTG_AP4_Q5
7477	WNT7B	wingless-type MMTV integration site family, member 7B			CAGGTG_E12_Q6						CAGCTG_AP4_Q5
11095	ADAMTS8	ADAM metallopeptidase with thrombospondin type 1 motif, 8			CAGGTG_E12_Q6						CAGCTG_AP4_Q5
10169	SERF2	small EDRK-rich factor 2			CAGGTG_E12_Q6						CAGCTG_AP4_Q5
7480	WNT10B	wingless-type MMTV integration site family, member 10B			CAGGTG_E12_Q6						CAGCTG_AP4_Q5
25837	RAB26	RAB26, member RAS oncogene family			CAGGTG_E12_Q6						CAGCTG_AP4_Q5
2081	ERN1	endoplasmic reticulum to nucleus signaling 1			CAGGTG_E12_Q6						CAGCTG_AP4_Q5
80233	C17orf70	chromosome 17 open reading frame 70			CAGGTG_E12_Q6						CAGCTG_AP4_Q5
5590	PRKCZ	protein kinase C, zeta			CAGGTG_E12_Q6							GATTGGY_NFY_Q6_01
4824	NKX3-1	NK3 homeobox 1			CAGGTG_E12_Q6							GATTGGY_NFY_Q6_01
25801	GCA	grancalcin, EF-hand calcium binding protein			CAGGTG_E12_Q6							GATTGGY_NFY_Q6_01
2074	ERCC6	excision repair cross-complementing rodent repair deficiency, complementation group 6			CAGGTG_E12_Q6
2170	FABP3	fatty acid binding protein 3, muscle and heart (mammary-derived growth inhibitor)			CAGGTG_E12_Q6
7037	TFRC	transferrin receptor (p90, CD71)			CAGGTG_E12_Q6
51309	ARMCX1	armadillo repeat containing, X-linked 1			CAGGTG_E12_Q6
1139	CHRNA7	cholinergic receptor, nicotinic, alpha 7			CAGGTG_E12_Q6
127733	UBXN10	UBX domain protein 10			CAGGTG_E12_Q6
27166	PRELID1	PRELI domain containing 1			CAGGTG_E12_Q6
401474	SAMD12	sterile alpha motif domain containing 12			CAGGTG_E12_Q6
2803	GOLGA4	golgin A4			CAGGTG_E12_Q6
55735	DNAJC11	DnaJ (Hsp40) homolog, subfamily C, member 11			CAGGTG_E12_Q6
10653	SPINT2	serine peptidase inhibitor, Kunitz type, 2			CAGGTG_E12_Q6
6732	SRPK1	SRSF protein kinase 1			CAGGTG_E12_Q6
5218	CDK14	cyclin-dependent kinase 14			CAGGTG_E12_Q6
2670	GFAP	glial fibrillary acidic protein			CAGGTG_E12_Q6
9331	B4GALT6	UDP-Gal:betaGlcNAc beta 1,4- galactosyltransferase, polypeptide 6			CAGGTG_E12_Q6
54961	SSH3	slingshot homolog 3 (Drosophila)			CAGGTG_E12_Q6
9381	OTOF	otoferlin			CAGGTG_E12_Q6
6751	SSTR1	somatostatin receptor 1			CAGGTG_E12_Q6
54903	MKS1	Meckel syndrome, type 1			CAGGTG_E12_Q6
65009	NDRG4	NDRG family member 4			CAGGTG_E12_Q6
22901	ARSG	arylsulfatase G			CAGGTG_E12_Q6
23242	COBL	cordon-bleu homolog (mouse)			CAGGTG_E12_Q6
7321	UBE2D1	ubiquitin-conjugating enzyme E2D 1			CAGGTG_E12_Q6
29887	SNX10	sorting nexin 10			CAGGTG_E12_Q6
259230	SGMS1	sphingomyelin synthase 1			CAGGTG_E12_Q6
57657	HCN3	hyperpolarization activated cyclic nucleotide-gated potassium channel 3			CAGGTG_E12_Q6
221785	ZNF498	zinc finger protein 498			CAGGTG_E12_Q6
84261	FBXW9	F-box and WD repeat domain containing 9			CAGGTG_E12_Q6
6015	RING1	ring finger protein 1			CAGGTG_E12_Q6
56474	CTPS2	CTP synthase II			CAGGTG_E12_Q6
55577	NAGK	N-acetylglucosamine kinase			CAGGTG_E12_Q6
51332	SPTBN5	spectrin, beta, non-erythrocytic 5			CAGGTG_E12_Q6
284018	C17orf58	chromosome 17 open reading frame 58			CAGGTG_E12_Q6
3739	KCNA4	potassium voltage-gated channel, shaker-related subfamily, member 4			CAGGTG_E12_Q6
6713	SQLE	squalene epoxidase			CAGGTG_E12_Q6
59084	ENPP5	ectonucleotide pyrophosphatase/phosphodiesterase 5 (putative)			CAGGTG_E12_Q6
81621	KAZALD1	Kazal-type serine peptidase inhibitor domain 1			CAGGTG_E12_Q6
9353	SLIT2	slit homolog 2 (Drosophila)			CAGGTG_E12_Q6
54760	PCSK4	proprotein convertase subtilisin/kexin type 4			CAGGTG_E12_Q6
9896	FIG4	FIG4 homolog, SAC1 lipid phosphatase domain containing (S. cerevisiae)			CAGGTG_E12_Q6
353189	SLCO4C1	solute carrier organic anion transporter family, member 4C1			CAGGTG_E12_Q6
9168	TMSB10	thymosin beta 10			CAGGTG_E12_Q6
124923	SGK494	uncharacterized serine/threonine-protein kinase SgK494			CAGGTG_E12_Q6
2628	GATM	glycine amidinotransferase (L-arginine:glycine amidinotransferase)			CAGGTG_E12_Q6
55163	PNPO	pyridoxamine 5'-phosphate oxidase			CAGGTG_E12_Q6
1122	CHML	choroideremia-like (Rab escort protein 2)			CAGGTG_E12_Q6
83605	CCM2	cerebral cavernous malformation 2			CAGGTG_E12_Q6
255743	NPNT	nephronectin			CAGGTG_E12_Q6
9491	PSMF1	proteasome (prosome, macropain) inhibitor subunit 1 (PI31)			CAGGTG_E12_Q6
55924	C1orf183	chromosome 1 open reading frame 183			CAGGTG_E12_Q6
10927	SPIN1	spindlin 1			CAGGTG_E12_Q6
6723	SRM	spermidine synthase			CAGGTG_E12_Q6
54765	TRIM44	tripartite motif containing 44			CAGGTG_E12_Q6
8785	MATN4	matrilin 4			CAGGTG_E12_Q6
4145	MATK	megakaryocyte-associated tyrosine kinase			CAGGTG_E12_Q6
7464	CORO2A	coronin, actin binding protein, 2A			CAGGTG_E12_Q6
147650	LINC00085	long intergenic non-protein coding RNA 85			CAGGTG_E12_Q6
2519	FUCA2	fucosidase, alpha-L- 2, plasma			CAGGTG_E12_Q6
64756	ATPAF1	ATP synthase mitochondrial F1 complex assembly factor 1			CAGGTG_E12_Q6
5091	PC	pyruvate carboxylase			CAGGTG_E12_Q6
130872	AHSA2	AHA1, activator of heat shock 90kDa protein ATPase homolog 2 (yeast)			CAGGTG_E12_Q6
54511	HMGCLL1	3-hydroxymethyl-3-methylglutaryl-CoA lyase-like 1			CAGGTG_E12_Q6
3786	KCNQ3	potassium voltage-gated channel, KQT-like subfamily, member 3			CAGGTG_E12_Q6
55752	2011-09-01	septin 11			CAGGTG_E12_Q6
3959	LGALS3BP	lectin, galactoside-binding, soluble, 3 binding protein			CAGGTG_E12_Q6
54749	EPDR1	ependymin related protein 1 (zebrafish)			CAGGTG_E12_Q6
10198	MPHOSPH9	M-phase phosphoprotein 9			CAGGTG_E12_Q6
148808	MFSD4	major facilitator superfamily domain containing 4			CAGGTG_E12_Q6
23225	NUP210	nucleoporin 210kDa			CAGGTG_E12_Q6
4285	MIPEP	mitochondrial intermediate peptidase			CAGGTG_E12_Q6
6447	SCG5	secretogranin V (7B2 protein)			CAGGTG_E12_Q6
83464	APH1B	anterior pharynx defective 1 homolog B (C. elegans)			CAGGTG_E12_Q6
2313	FLI1	Friend leukemia virus integration 1				GGGAGGRR_MAZ_Q6	TTGTTT_FOXO4_01	GGGTGGRR_PAX4_03	AACTTT_UNKNOWN	TGGAAA_NFAT_Q4_01
953	ENTPD1	ectonucleoside triphosphate diphosphohydrolase 1				GGGAGGRR_MAZ_Q6	TTGTTT_FOXO4_01	GGGTGGRR_PAX4_03
2259	FGF14	fibroblast growth factor 14				GGGAGGRR_MAZ_Q6	TTGTTT_FOXO4_01		AACTTT_UNKNOWN	TGGAAA_NFAT_Q4_01	CAGCTG_AP4_Q5
4081	MAB21L1	mab-21-like 1 (C. elegans)				GGGAGGRR_MAZ_Q6	TTGTTT_FOXO4_01		AACTTT_UNKNOWN	TGGAAA_NFAT_Q4_01		GATTGGY_NFY_Q6_01
7873	MANF	mesencephalic astrocyte-derived neurotrophic factor				GGGAGGRR_MAZ_Q6	TTGTTT_FOXO4_01		AACTTT_UNKNOWN	TGGAAA_NFAT_Q4_01
7436	VLDLR	very low density lipoprotein receptor				GGGAGGRR_MAZ_Q6	TTGTTT_FOXO4_01		AACTTT_UNKNOWN			GATTGGY_NFY_Q6_01
80344	DCAF11	DDB1 and CUL4 associated factor 11				GGGAGGRR_MAZ_Q6	TTGTTT_FOXO4_01			TGGAAA_NFAT_Q4_01		GATTGGY_NFY_Q6_01
84316	LSMD1	LSM domain containing 1				GGGAGGRR_MAZ_Q6	TTGTTT_FOXO4_01			TGGAAA_NFAT_Q4_01
54476	RNF216	ring finger protein 216				GGGAGGRR_MAZ_Q6	TTGTTT_FOXO4_01				CAGCTG_AP4_Q5
1620	DBC1	deleted in bladder cancer 1				GGGAGGRR_MAZ_Q6	TTGTTT_FOXO4_01				CAGCTG_AP4_Q5
7461	CLIP2	CAP-GLY domain containing linker protein 2				GGGAGGRR_MAZ_Q6	TTGTTT_FOXO4_01
84928	TMEM209	transmembrane protein 209				GGGAGGRR_MAZ_Q6	TTGTTT_FOXO4_01
51170	HSD17B11	hydroxysteroid (17-beta) dehydrogenase 11				GGGAGGRR_MAZ_Q6	TTGTTT_FOXO4_01
144402	CPNE8	copine VIII				GGGAGGRR_MAZ_Q6		GGGTGGRR_PAX4_03	AACTTT_UNKNOWN
3932	LCK	lymphocyte-specific protein tyrosine kinase				GGGAGGRR_MAZ_Q6		GGGTGGRR_PAX4_03			CAGCTG_AP4_Q5
9832	JAKMIP2	janus kinase and microtubule interacting protein 2				GGGAGGRR_MAZ_Q6		GGGTGGRR_PAX4_03			CAGCTG_AP4_Q5
894	CCND2	cyclin D2				GGGAGGRR_MAZ_Q6		GGGTGGRR_PAX4_03			CAGCTG_AP4_Q5
51560	RAB6B	RAB6B, member RAS oncogene family				GGGAGGRR_MAZ_Q6		GGGTGGRR_PAX4_03
9362	CPNE6	copine VI (neuronal)				GGGAGGRR_MAZ_Q6		GGGTGGRR_PAX4_03
29942	PURG	purine-rich element binding protein G				GGGAGGRR_MAZ_Q6		GGGTGGRR_PAX4_03
55294	FBXW7	F-box and WD repeat domain containing 7				GGGAGGRR_MAZ_Q6			AACTTT_UNKNOWN	TGGAAA_NFAT_Q4_01
81618	ITM2C	integral membrane protein 2C				GGGAGGRR_MAZ_Q6			AACTTT_UNKNOWN	TGGAAA_NFAT_Q4_01
129684	CNTNAP5	contactin associated protein-like 5				GGGAGGRR_MAZ_Q6			AACTTT_UNKNOWN		CAGCTG_AP4_Q5
132884	EVC2	Ellis van Creveld syndrome 2				GGGAGGRR_MAZ_Q6			AACTTT_UNKNOWN
6482	ST3GAL1	ST3 beta-galactoside alpha-2,3-sialyltransferase 1				GGGAGGRR_MAZ_Q6			AACTTT_UNKNOWN
22871	NLGN1	neuroligin 1				GGGAGGRR_MAZ_Q6			AACTTT_UNKNOWN
8739	HRK	harakiri, BCL2 interacting protein (contains only BH3 domain)				GGGAGGRR_MAZ_Q6			AACTTT_UNKNOWN
7167	TPI1	triosephosphate isomerase 1				GGGAGGRR_MAZ_Q6				TGGAAA_NFAT_Q4_01	CAGCTG_AP4_Q5
273	AMPH	amphiphysin				GGGAGGRR_MAZ_Q6				TGGAAA_NFAT_Q4_01	CAGCTG_AP4_Q5
196883	ADCY4	adenylate cyclase 4				GGGAGGRR_MAZ_Q6				TGGAAA_NFAT_Q4_01	CAGCTG_AP4_Q5
22876	INPP5F	inositol polyphosphate-5-phosphatase F				GGGAGGRR_MAZ_Q6				TGGAAA_NFAT_Q4_01
6539	SLC6A12	solute carrier family 6 (neurotransmitter transporter, betaine/GABA), member 12				GGGAGGRR_MAZ_Q6				TGGAAA_NFAT_Q4_01
7423	VEGFB	vascular endothelial growth factor B				GGGAGGRR_MAZ_Q6				TGGAAA_NFAT_Q4_01
1490	CTGF	connective tissue growth factor				GGGAGGRR_MAZ_Q6				TGGAAA_NFAT_Q4_01
64411	ARAP3	ArfGAP with RhoGAP domain, ankyrin repeat and PH domain 3				GGGAGGRR_MAZ_Q6				TGGAAA_NFAT_Q4_01
5864	RAB3A	RAB3A, member RAS oncogene family				GGGAGGRR_MAZ_Q6					CAGCTG_AP4_Q5
7139	TNNT2	troponin T type 2 (cardiac)				GGGAGGRR_MAZ_Q6					CAGCTG_AP4_Q5
79885	HDAC11	histone deacetylase 11				GGGAGGRR_MAZ_Q6					CAGCTG_AP4_Q5
4613	MYCN	v-myc myelocytomatosis viral related oncogene, neuroblastoma derived (avian)				GGGAGGRR_MAZ_Q6					CAGCTG_AP4_Q5
51807	TUBA8	tubulin, alpha 8				GGGAGGRR_MAZ_Q6					CAGCTG_AP4_Q5
79930	DOK3	docking protein 3				GGGAGGRR_MAZ_Q6					CAGCTG_AP4_Q5
57572	DOCK6	dedicator of cytokinesis 6				GGGAGGRR_MAZ_Q6					CAGCTG_AP4_Q5
4074	M6PR	mannose-6-phosphate receptor (cation dependent)				GGGAGGRR_MAZ_Q6						GATTGGY_NFY_Q6_01
29123	ANKRD11	ankyrin repeat domain 11				GGGAGGRR_MAZ_Q6						GATTGGY_NFY_Q6_01
9682	KDM4A	lysine (K)-specific demethylase 4A				GGGAGGRR_MAZ_Q6						GATTGGY_NFY_Q6_01
50813	COPS7A	COP9 constitutive photomorphogenic homolog subunit 7A (Arabidopsis)				GGGAGGRR_MAZ_Q6
402	ARL2	ADP-ribosylation factor-like 2				GGGAGGRR_MAZ_Q6
257019	FRMD3	FERM domain containing 3				GGGAGGRR_MAZ_Q6
348654	GEN1	Gen homolog 1, endonuclease (Drosophila)				GGGAGGRR_MAZ_Q6
3187	HNRNPH1	heterogeneous nuclear ribonucleoprotein H1 (H)				GGGAGGRR_MAZ_Q6
9575	CLOCK	clock homolog (mouse)				GGGAGGRR_MAZ_Q6
54788	DNAJB12	DnaJ (Hsp40) homolog, subfamily B, member 12				GGGAGGRR_MAZ_Q6
6125	RPL5	ribosomal protein L5				GGGAGGRR_MAZ_Q6
337867	UBAC2	UBA domain containing 2				GGGAGGRR_MAZ_Q6
2617	GARS	glycyl-tRNA synthetase				GGGAGGRR_MAZ_Q6
4674	NAP1L2	nucleosome assembly protein 1-like 2				GGGAGGRR_MAZ_Q6
8751	ADAM15	ADAM metallopeptidase domain 15				GGGAGGRR_MAZ_Q6
114815	SORCS1	sortilin-related VPS10 domain containing receptor 1				GGGAGGRR_MAZ_Q6
960	CD44	CD44 molecule (Indian blood group)				GGGAGGRR_MAZ_Q6
84502	JPH4	junctophilin 4				GGGAGGRR_MAZ_Q6
4222	MEOX1	mesenchyme homeobox 1				GGGAGGRR_MAZ_Q6
83694	RPS6KL1	ribosomal protein S6 kinase-like 1				GGGAGGRR_MAZ_Q6
81855	SFXN3	sideroflexin 3				GGGAGGRR_MAZ_Q6
1911	PHC1	polyhomeotic homolog 1 (Drosophila)				GGGAGGRR_MAZ_Q6
55843	ARHGAP15	Rho GTPase activating protein 15				GGGAGGRR_MAZ_Q6
2583	B4GALNT1	beta-1,4-N-acetyl-galactosaminyl transferase 1				GGGAGGRR_MAZ_Q6
55720	TSR1	TSR1, 20S rRNA accumulation, homolog (S. cerevisiae)				GGGAGGRR_MAZ_Q6
9754	STARD8	StAR-related lipid transfer (START) domain containing 8				GGGAGGRR_MAZ_Q6
5511	PPP1R8	protein phosphatase 1, regulatory subunit 8				GGGAGGRR_MAZ_Q6
23413	NCS1	neuronal calcium sensor 1				GGGAGGRR_MAZ_Q6
389	RHOC	ras homolog gene family, member C				GGGAGGRR_MAZ_Q6
1290	COL5A2	collagen, type V, alpha 2				GGGAGGRR_MAZ_Q6
80352	RNF39	ring finger protein 39				GGGAGGRR_MAZ_Q6
187	APLNR	apelin receptor				GGGAGGRR_MAZ_Q6
9487	PIGL	phosphatidylinositol glycan anchor biosynthesis, class L				GGGAGGRR_MAZ_Q6
9675	TTI1	Tel2 interacting protein 1 homolog (S. pombe)				GGGAGGRR_MAZ_Q6
720	C4A	complement component 4A (Rodgers blood group)				GGGAGGRR_MAZ_Q6
84182	FAM188B	family with sequence similarity 188, member B				GGGAGGRR_MAZ_Q6
3949	LDLR	low density lipoprotein receptor				GGGAGGRR_MAZ_Q6
11033	ADAP1	ArfGAP with dual PH domains 1				GGGAGGRR_MAZ_Q6
84302	C9orf125	chromosome 9 open reading frame 125				GGGAGGRR_MAZ_Q6
140606	SELM	selenoprotein M				GGGAGGRR_MAZ_Q6
9812	KIAA0141	KIAA0141				GGGAGGRR_MAZ_Q6
84867	PTPN5	protein tyrosine phosphatase, non-receptor type 5 (striatum-enriched)				GGGAGGRR_MAZ_Q6
79066	METTL16	methyltransferase like 16				GGGAGGRR_MAZ_Q6
9122	SLC16A4	solute carrier family 16, member 4 (monocarboxylic acid transporter 5)				GGGAGGRR_MAZ_Q6
1263	PLK3	polo-like kinase 3				GGGAGGRR_MAZ_Q6
51473	DCDC2	doublecortin domain containing 2				GGGAGGRR_MAZ_Q6
56902	PNO1	partner of NOB1 homolog (S. cerevisiae)				GGGAGGRR_MAZ_Q6
84795	PYROXD2	pyridine nucleotide-disulphide oxidoreductase domain 2				GGGAGGRR_MAZ_Q6
3479	IGF1	insulin-like growth factor 1 (somatomedin C)					TTGTTT_FOXO4_01	GGGTGGRR_PAX4_03	AACTTT_UNKNOWN	TGGAAA_NFAT_Q4_01	CAGCTG_AP4_Q5
80059	LRRTM4	leucine rich repeat transmembrane neuronal 4					TTGTTT_FOXO4_01	GGGTGGRR_PAX4_03	AACTTT_UNKNOWN	TGGAAA_NFAT_Q4_01
5886	RAD23A	RAD23 homolog A (S. cerevisiae)					TTGTTT_FOXO4_01	GGGTGGRR_PAX4_03	AACTTT_UNKNOWN	TGGAAA_NFAT_Q4_01
59345	GNB4	guanine nucleotide binding protein (G protein), beta polypeptide 4					TTGTTT_FOXO4_01	GGGTGGRR_PAX4_03	AACTTT_UNKNOWN
83988	NCALD	neurocalcin delta					TTGTTT_FOXO4_01	GGGTGGRR_PAX4_03	AACTTT_UNKNOWN
23593	HEBP2	heme binding protein 2					TTGTTT_FOXO4_01	GGGTGGRR_PAX4_03		TGGAAA_NFAT_Q4_01
9603	NFE2L3	nuclear factor (erythroid-derived 2)-like 3					TTGTTT_FOXO4_01	GGGTGGRR_PAX4_03
51186	WBP5	WW domain binding protein 5					TTGTTT_FOXO4_01	GGGTGGRR_PAX4_03
54716	SLC6A20	solute carrier family 6 (proline IMINO transporter), member 20					TTGTTT_FOXO4_01	GGGTGGRR_PAX4_03
79827	CLMP	CXADR-like membrane protein					TTGTTT_FOXO4_01	GGGTGGRR_PAX4_03
55504	TNFRSF19	tumor necrosis factor receptor superfamily, member 19					TTGTTT_FOXO4_01		AACTTT_UNKNOWN	TGGAAA_NFAT_Q4_01	CAGCTG_AP4_Q5
140890	SREK1	splicing regulatory glutamine/lysine-rich protein 1					TTGTTT_FOXO4_01		AACTTT_UNKNOWN	TGGAAA_NFAT_Q4_01
26137	ZBTB20	zinc finger and BTB domain containing 20					TTGTTT_FOXO4_01		AACTTT_UNKNOWN		CAGCTG_AP4_Q5	GATTGGY_NFY_Q6_01
4857	NOVA1	neuro-oncological ventral antigen 1					TTGTTT_FOXO4_01		AACTTT_UNKNOWN		CAGCTG_AP4_Q5
11343	MGLL	monoglyceride lipase					TTGTTT_FOXO4_01		AACTTT_UNKNOWN		CAGCTG_AP4_Q5
222008	VSTM2A	V-set and transmembrane domain containing 2A					TTGTTT_FOXO4_01		AACTTT_UNKNOWN		CAGCTG_AP4_Q5
8555	CDC14B	CDC14 cell division cycle 14 homolog B (S. cerevisiae)					TTGTTT_FOXO4_01		AACTTT_UNKNOWN			GATTGGY_NFY_Q6_01
10228	STX6	syntaxin 6					TTGTTT_FOXO4_01		AACTTT_UNKNOWN
83450	LRRC48	leucine rich repeat containing 48					TTGTTT_FOXO4_01		AACTTT_UNKNOWN
146691	TOM1L2	target of myb1-like 2 (chicken)					TTGTTT_FOXO4_01		AACTTT_UNKNOWN
84253	GARNL3	GTPase activating Rap/RanGAP domain-like 3					TTGTTT_FOXO4_01		AACTTT_UNKNOWN
845	CASQ2	calsequestrin 2 (cardiac muscle)					TTGTTT_FOXO4_01		AACTTT_UNKNOWN
22929	SEPHS1	selenophosphate synthetase 1					TTGTTT_FOXO4_01		AACTTT_UNKNOWN
9184	BUB3	budding uninhibited by benzimidazoles 3 homolog (yeast)					TTGTTT_FOXO4_01		AACTTT_UNKNOWN
140767	NRSN1	neurensin 1					TTGTTT_FOXO4_01		AACTTT_UNKNOWN
59350	RXFP1	relaxin/insulin-like family peptide receptor 1					TTGTTT_FOXO4_01		AACTTT_UNKNOWN
51705	EMCN	endomucin					TTGTTT_FOXO4_01		AACTTT_UNKNOWN
84084	RAB6C	RAB6C, member RAS oncogene family					TTGTTT_FOXO4_01		AACTTT_UNKNOWN
91752	ZNF804A	zinc finger protein 804A					TTGTTT_FOXO4_01		AACTTT_UNKNOWN
23348	DOCK9	dedicator of cytokinesis 9					TTGTTT_FOXO4_01			TGGAAA_NFAT_Q4_01	CAGCTG_AP4_Q5	GATTGGY_NFY_Q6_01
54674	LRRN3	leucine rich repeat neuronal 3					TTGTTT_FOXO4_01			TGGAAA_NFAT_Q4_01	CAGCTG_AP4_Q5	GATTGGY_NFY_Q6_01
57569	ARHGAP20	Rho GTPase activating protein 20					TTGTTT_FOXO4_01			TGGAAA_NFAT_Q4_01
11167	FSTL1	follistatin-like 1					TTGTTT_FOXO4_01			TGGAAA_NFAT_Q4_01
9324	HMGN3	high mobility group nucleosomal binding domain 3					TTGTTT_FOXO4_01			TGGAAA_NFAT_Q4_01
2012	EMP1	epithelial membrane protein 1					TTGTTT_FOXO4_01			TGGAAA_NFAT_Q4_01
25780	RASGRP3	RAS guanyl releasing protein 3 (calcium and DAG-regulated)					TTGTTT_FOXO4_01			TGGAAA_NFAT_Q4_01
80199	FUZ	fuzzy homolog (Drosophila)					TTGTTT_FOXO4_01			TGGAAA_NFAT_Q4_01
79634	SCRN3	secernin 3					TTGTTT_FOXO4_01			TGGAAA_NFAT_Q4_01
7458	EIF4H	eukaryotic translation initiation factor 4H					TTGTTT_FOXO4_01			TGGAAA_NFAT_Q4_01
90861	HN1L	hematological and neurological expressed 1-like					TTGTTT_FOXO4_01			TGGAAA_NFAT_Q4_01
25891	PAMR1	peptidase domain containing associated with muscle regeneration 1					TTGTTT_FOXO4_01			TGGAAA_NFAT_Q4_01
27346	TMEM97	transmembrane protein 97					TTGTTT_FOXO4_01			TGGAAA_NFAT_Q4_01
29766	TMOD3	tropomodulin 3 (ubiquitous)					TTGTTT_FOXO4_01				CAGCTG_AP4_Q5
55016	2001-03-01	membrane-associated ring finger (C3HC4) 1					TTGTTT_FOXO4_01				CAGCTG_AP4_Q5
10397	NDRG1	N-myc downstream regulated 1					TTGTTT_FOXO4_01				CAGCTG_AP4_Q5
79446	WDR25	WD repeat domain 25					TTGTTT_FOXO4_01				CAGCTG_AP4_Q5
5066	PAM	peptidylglycine alpha-amidating monooxygenase					TTGTTT_FOXO4_01				CAGCTG_AP4_Q5
6404	SELPLG	selectin P ligand					TTGTTT_FOXO4_01				CAGCTG_AP4_Q5
23387	SIK3	SIK family kinase 3					TTGTTT_FOXO4_01					GATTGGY_NFY_Q6_01
51019	CCDC53	coiled-coil domain containing 53					TTGTTT_FOXO4_01					GATTGGY_NFY_Q6_01
3638	INSIG1	insulin induced gene 1					TTGTTT_FOXO4_01					GATTGGY_NFY_Q6_01
51134	CCDC41	coiled-coil domain containing 41					TTGTTT_FOXO4_01
84889	SLC7A3	solute carrier family 7 (cationic amino acid transporter, y+ system), member 3					TTGTTT_FOXO4_01
2977	GUCY1A2	guanylate cyclase 1, soluble, alpha 2					TTGTTT_FOXO4_01
51000	SLC35B3	solute carrier family 35, member B3					TTGTTT_FOXO4_01
10845	CLPX	ClpX caseinolytic peptidase X homolog (E. coli)					TTGTTT_FOXO4_01
84957	RELT	RELT tumor necrosis factor receptor					TTGTTT_FOXO4_01
23334	SZT2	seizure threshold 2 homolog (mouse)					TTGTTT_FOXO4_01
6303	SAT1	spermidine/spermine N1-acetyltransferase 1					TTGTTT_FOXO4_01
63973	NEUROG2	neurogenin 2					TTGTTT_FOXO4_01
3351	HTR1B	5-hydroxytryptamine (serotonin) receptor 1B					TTGTTT_FOXO4_01
55103	RALGPS2	Ral GEF with PH domain and SH3 binding motif 2					TTGTTT_FOXO4_01
9706	ULK2	unc-51-like kinase 2 (C. elegans)					TTGTTT_FOXO4_01
79609	METTL21D	methyltransferase like 21D					TTGTTT_FOXO4_01
163589	TDRD5	tudor domain containing 5					TTGTTT_FOXO4_01
9685	CLINT1	clathrin interactor 1					TTGTTT_FOXO4_01
85458	DIXDC1	DIX domain containing 1					TTGTTT_FOXO4_01
9349	RPL23	ribosomal protein L23					TTGTTT_FOXO4_01
1690	COCH	coagulation factor C homolog, cochlin (Limulus polyphemus)					TTGTTT_FOXO4_01
3937	LCP2	lymphocyte cytosolic protein 2 (SH2 domain containing leukocyte protein of 76kDa)					TTGTTT_FOXO4_01
51655	RASD1	RAS, dexamethasone-induced 1					TTGTTT_FOXO4_01
5764	PTN	pleiotrophin					TTGTTT_FOXO4_01
4848	CNOT2	CCR4-NOT transcription complex, subunit 2					TTGTTT_FOXO4_01
6038	RNASE4	ribonuclease, RNase A family, 4					TTGTTT_FOXO4_01
8445	DYRK2	dual-specificity tyrosine-(Y)-phosphorylation regulated kinase 2					TTGTTT_FOXO4_01
100133941	CD24	CD24 molecule					TTGTTT_FOXO4_01
4625	MYH7	myosin, heavy chain 7, cardiac muscle, beta					TTGTTT_FOXO4_01
324	APC	adenomatous polyposis coli					TTGTTT_FOXO4_01
64388	GREM2	gremlin 2					TTGTTT_FOXO4_01
9957	HS3ST1	heparan sulfate (glucosamine) 3-O-sulfotransferase 1					TTGTTT_FOXO4_01
2822	GPLD1	glycosylphosphatidylinositol specific phospholipase D1					TTGTTT_FOXO4_01
25876	SPEF1	sperm flagellar 1					TTGTTT_FOXO4_01
89932	PAPLN	papilin, proteoglycan-like sulfated glycoprotein					TTGTTT_FOXO4_01
9581	PREPL	prolyl endopeptidase-like					TTGTTT_FOXO4_01
23017	FAIM2	Fas apoptotic inhibitory molecule 2					TTGTTT_FOXO4_01
84272	YIPF4	Yip1 domain family, member 4					TTGTTT_FOXO4_01
23336	SYNM	synemin, intermediate filament protein					TTGTTT_FOXO4_01
84871	AGBL4	ATP/GTP binding protein-like 4					TTGTTT_FOXO4_01
55656	INTS8	integrator complex subunit 8					TTGTTT_FOXO4_01
7957	EPM2A	epilepsy, progressive myoclonus type 2A, Lafora disease (laforin)					TTGTTT_FOXO4_01
3306	HSPA2	heat shock 70kDa protein 2					TTGTTT_FOXO4_01
53944	CSNK1G1	casein kinase 1, gamma 1					TTGTTT_FOXO4_01
5681	PSKH1	protein serine kinase H1					TTGTTT_FOXO4_01
257160	RNF214	ring finger protein 214					TTGTTT_FOXO4_01
375287	RBM43	RNA binding motif protein 43					TTGTTT_FOXO4_01
51100	SH3GLB1	SH3-domain GRB2-like endophilin B1					TTGTTT_FOXO4_01
23072	HECW1	HECT, C2 and WW domain containing E3 ubiquitin protein ligase 1					TTGTTT_FOXO4_01
23155	CLCC1	chloride channel CLIC-like 1					TTGTTT_FOXO4_01
55778	ZNF839	zinc finger protein 839					TTGTTT_FOXO4_01
60558	GUF1	GUF1 GTPase homolog (S. cerevisiae)					TTGTTT_FOXO4_01
8036	SHOC2	soc-2 suppressor of clear homolog (C. elegans)					TTGTTT_FOXO4_01
8507	ENC1	ectodermal-neural cortex 1 (with BTB-like domain)					TTGTTT_FOXO4_01
858	CAV2	caveolin 2					TTGTTT_FOXO4_01
8099	CDK2AP1	cyclin-dependent kinase 2 associated protein 1						GGGTGGRR_PAX4_03	AACTTT_UNKNOWN	TGGAAA_NFAT_Q4_01
399947	C11orf87	chromosome 11 open reading frame 87						GGGTGGRR_PAX4_03	AACTTT_UNKNOWN		CAGCTG_AP4_Q5
11261	CHP	calcium binding protein P22						GGGTGGRR_PAX4_03	AACTTT_UNKNOWN			GATTGGY_NFY_Q6_01
10109	ARPC2	actin related protein 2/3 complex, subunit 2, 34kDa						GGGTGGRR_PAX4_03	AACTTT_UNKNOWN
5526	PPP2R5B	protein phosphatase 2, regulatory subunit B', beta						GGGTGGRR_PAX4_03	AACTTT_UNKNOWN
157313	CDCA2	cell division cycle associated 2						GGGTGGRR_PAX4_03	AACTTT_UNKNOWN
10682	EBP	emopamil binding protein (sterol isomerase)						GGGTGGRR_PAX4_03		TGGAAA_NFAT_Q4_01
6281	S100A10	S100 calcium binding protein A10						GGGTGGRR_PAX4_03		TGGAAA_NFAT_Q4_01
3699	ITIH3	inter-alpha-trypsin inhibitor heavy chain 3						GGGTGGRR_PAX4_03		TGGAAA_NFAT_Q4_01
9937	DCLRE1A	DNA cross-link repair 1A						GGGTGGRR_PAX4_03			CAGCTG_AP4_Q5
6668	SP2	Sp2 transcription factor						GGGTGGRR_PAX4_03				GATTGGY_NFY_Q6_01
3014	H2AFX	H2A histone family, member X						GGGTGGRR_PAX4_03				GATTGGY_NFY_Q6_01
92745	SLC38A5	solute carrier family 38, member 5						GGGTGGRR_PAX4_03
8907	AP1M1	adaptor-related protein complex 1, mu 1 subunit						GGGTGGRR_PAX4_03
890	CCNA2	cyclin A2						GGGTGGRR_PAX4_03
7001	PRDX2	peroxiredoxin 2						GGGTGGRR_PAX4_03
148014	TTC9B	tetratricopeptide repeat domain 9B						GGGTGGRR_PAX4_03
506	ATP5B	ATP synthase, H+ transporting, mitochondrial F1 complex, beta polypeptide						GGGTGGRR_PAX4_03
5829	PXN	paxillin						GGGTGGRR_PAX4_03
51393	TRPV2	transient receptor potential cation channel, subfamily V, member 2						GGGTGGRR_PAX4_03
84134	TOMM40L	translocase of outer mitochondrial membrane 40 homolog (yeast)-like						GGGTGGRR_PAX4_03
78990	OTUB2	OTU domain, ubiquitin aldehyde binding 2						GGGTGGRR_PAX4_03
10318	TNIP1	TNFAIP3 interacting protein 1						GGGTGGRR_PAX4_03
84557	MAP1LC3A	microtubule-associated protein 1 light chain 3 alpha						GGGTGGRR_PAX4_03
397	ARHGDIB	Rho GDP dissociation inhibitor (GDI) beta						GGGTGGRR_PAX4_03
9776	ATG13	ATG13 autophagy related 13 homolog (S. cerevisiae)						GGGTGGRR_PAX4_03
124402	FAM100A	family with sequence similarity 100, member A						GGGTGGRR_PAX4_03
310	ANXA7	annexin A7						GGGTGGRR_PAX4_03
55250	ELP2	elongation protein 2 homolog (S. cerevisiae)						GGGTGGRR_PAX4_03
57650	KIAA1524	KIAA1524						GGGTGGRR_PAX4_03
11309	SLCO2B1	solute carrier organic anion transporter family, member 2B1						GGGTGGRR_PAX4_03
79415	C17orf62	chromosome 17 open reading frame 62						GGGTGGRR_PAX4_03
51136	RNFT1	ring finger protein, transmembrane 1						GGGTGGRR_PAX4_03
338773	TMEM119	transmembrane protein 119						GGGTGGRR_PAX4_03
79703	C11orf80	chromosome 11 open reading frame 80						GGGTGGRR_PAX4_03
53822	FXYD7	FXYD domain containing ion transport regulator 7						GGGTGGRR_PAX4_03
4736	RPL10A	ribosomal protein L10a						GGGTGGRR_PAX4_03
10287	RGS19	regulator of G-protein signaling 19						GGGTGGRR_PAX4_03
3859	KRT12	keratin 12						GGGTGGRR_PAX4_03
10232	MSLN	mesothelin						GGGTGGRR_PAX4_03
7494	XBP1	X-box binding protein 1							AACTTT_UNKNOWN	TGGAAA_NFAT_Q4_01	CAGCTG_AP4_Q5	GATTGGY_NFY_Q6_01
339479	FAM5C	family with sequence similarity 5, member C							AACTTT_UNKNOWN	TGGAAA_NFAT_Q4_01	CAGCTG_AP4_Q5
114299	PALM2	paralemmin 2							AACTTT_UNKNOWN	TGGAAA_NFAT_Q4_01	CAGCTG_AP4_Q5
140578	CHODL	chondrolectin							AACTTT_UNKNOWN	TGGAAA_NFAT_Q4_01		GATTGGY_NFY_Q6_01
8669	EIF3J	eukaryotic translation initiation factor 3, subunit J							AACTTT_UNKNOWN	TGGAAA_NFAT_Q4_01
493	ATP2B4	ATPase, Ca++ transporting, plasma membrane 4							AACTTT_UNKNOWN	TGGAAA_NFAT_Q4_01
9489	PGS1	phosphatidylglycerophosphate synthase 1							AACTTT_UNKNOWN	TGGAAA_NFAT_Q4_01
3053	SERPIND1	serpin peptidase inhibitor, clade D (heparin cofactor), member 1							AACTTT_UNKNOWN	TGGAAA_NFAT_Q4_01
10252	SPRY1	sprouty homolog 1, antagonist of FGF signaling (Drosophila)							AACTTT_UNKNOWN	TGGAAA_NFAT_Q4_01
9748	SLK	STE20-like kinase							AACTTT_UNKNOWN	TGGAAA_NFAT_Q4_01
3613	IMPA2	inositol(myo)-1(or 4)-monophosphatase 2							AACTTT_UNKNOWN	TGGAAA_NFAT_Q4_01
83442	SH3BGRL3	SH3 domain binding glutamic acid-rich protein like 3							AACTTT_UNKNOWN		CAGCTG_AP4_Q5
10842	PPP1R17	protein phosphatase 1, regulatory subunit 17							AACTTT_UNKNOWN		CAGCTG_AP4_Q5
5563	PRKAA2	protein kinase, AMP-activated, alpha 2 catalytic subunit							AACTTT_UNKNOWN		CAGCTG_AP4_Q5
11065	UBE2C	ubiquitin-conjugating enzyme E2C							AACTTT_UNKNOWN			GATTGGY_NFY_Q6_01
79776	ZFHX4	zinc finger homeobox 4							AACTTT_UNKNOWN			GATTGGY_NFY_Q6_01
1007	CDH9	cadherin 9, type 2 (T1-cadherin)							AACTTT_UNKNOWN			GATTGGY_NFY_Q6_01
26121	PRPF31	PRP31 pre-mRNA processing factor 31 homolog (S. cerevisiae)							AACTTT_UNKNOWN			GATTGGY_NFY_Q6_01
10627	MYL12A	myosin, light chain 12A, regulatory, non-sarcomeric							AACTTT_UNKNOWN
5325	PLAGL1	pleiomorphic adenoma gene-like 1							AACTTT_UNKNOWN
8725	C19orf2	chromosome 19 open reading frame 2							AACTTT_UNKNOWN
79624	C6orf211	chromosome 6 open reading frame 211							AACTTT_UNKNOWN
22938	SNW1	SNW domain containing 1							AACTTT_UNKNOWN
11163	NUDT4	nudix (nucleoside diphosphate linked moiety X)-type motif 4							AACTTT_UNKNOWN
114134	SLC2A13	solute carrier family 2 (facilitated glucose transporter), member 13							AACTTT_UNKNOWN
10085	EDIL3	EGF-like repeats and discoidin I-like domains 3							AACTTT_UNKNOWN
84886	C1orf198	chromosome 1 open reading frame 198							AACTTT_UNKNOWN
11174	ADAMTS6	ADAM metallopeptidase with thrombospondin type 1 motif, 6							AACTTT_UNKNOWN
5746	PTH2R	parathyroid hormone 2 receptor							AACTTT_UNKNOWN
284058	KIAA1267	KIAA1267							AACTTT_UNKNOWN
286410	ATP11C	ATPase, class VI, type 11C							AACTTT_UNKNOWN
280	AMY2B	amylase, alpha 2B (pancreatic)							AACTTT_UNKNOWN
23321	TRIM2	tripartite motif containing 2							AACTTT_UNKNOWN
1316	KLF6	Kruppel-like factor 6							AACTTT_UNKNOWN
3621	ING1	inhibitor of growth family, member 1							AACTTT_UNKNOWN
204851	HIPK1	homeodomain interacting protein kinase 1							AACTTT_UNKNOWN
1459	CSNK2A2	casein kinase 2, alpha prime polypeptide							AACTTT_UNKNOWN
90355	C5orf30	chromosome 5 open reading frame 30							AACTTT_UNKNOWN
1894	ECT2	epithelial cell transforming sequence 2 oncogene							AACTTT_UNKNOWN
23205	ACSBG1	acyl-CoA synthetase bubblegum family member 1							AACTTT_UNKNOWN
53829	P2RY13	purinergic receptor P2Y, G-protein coupled, 13							AACTTT_UNKNOWN
947	CD34	CD34 molecule							AACTTT_UNKNOWN
7201	TRHR	thyrotropin-releasing hormone receptor							AACTTT_UNKNOWN
5019	OXCT1	3-oxoacid CoA transferase 1							AACTTT_UNKNOWN
26958	COPG2	coatomer protein complex, subunit gamma 2							AACTTT_UNKNOWN
2782	GNB1	guanine nucleotide binding protein (G protein), beta polypeptide 1							AACTTT_UNKNOWN
284339	TMEM145	transmembrane protein 145							AACTTT_UNKNOWN
23492	CBX7	chromobox homolog 7							AACTTT_UNKNOWN
6720	SREBF1	sterol regulatory element binding transcription factor 1							AACTTT_UNKNOWN
4931	NVL	nuclear VCP-like							AACTTT_UNKNOWN
9133	CCNB2	cyclin B2							AACTTT_UNKNOWN
79608	RIC3	resistance to inhibitors of cholinesterase 3 homolog (C. elegans)							AACTTT_UNKNOWN
3356	HTR2A	5-hydroxytryptamine (serotonin) receptor 2A							AACTTT_UNKNOWN
57577	KIAA1407	KIAA1407								TGGAAA_NFAT_Q4_01	CAGCTG_AP4_Q5	GATTGGY_NFY_Q6_01
11311	VPS45	vacuolar protein sorting 45 homolog (S. cerevisiae)								TGGAAA_NFAT_Q4_01	CAGCTG_AP4_Q5
6711	SPTBN1	spectrin, beta, non-erythrocytic 1								TGGAAA_NFAT_Q4_01	CAGCTG_AP4_Q5
26034	IPCEF1	interaction protein for cytohesin exchange factors 1								TGGAAA_NFAT_Q4_01	CAGCTG_AP4_Q5
516	ATP5G1	ATP synthase, H+ transporting, mitochondrial Fo complex, subunit C1 (subunit 9)								TGGAAA_NFAT_Q4_01		GATTGGY_NFY_Q6_01
134429	STARD4	StAR-related lipid transfer (START) domain containing 4								TGGAAA_NFAT_Q4_01		GATTGGY_NFY_Q6_01
5189	PEX1	peroxisomal biogenesis factor 1								TGGAAA_NFAT_Q4_01		GATTGGY_NFY_Q6_01
6049	RNF6	ring finger protein (C3H2C3 type) 6								TGGAAA_NFAT_Q4_01		GATTGGY_NFY_Q6_01
4691	NCL	nucleolin								TGGAAA_NFAT_Q4_01
7447	VSNL1	visinin-like 1								TGGAAA_NFAT_Q4_01
27044	SND1	staphylococcal nuclease and tudor domain containing 1								TGGAAA_NFAT_Q4_01
11083	DIDO1	death inducer-obliterator 1								TGGAAA_NFAT_Q4_01
988	CDC5L	CDC5 cell division cycle 5-like (S. pombe)								TGGAAA_NFAT_Q4_01
6326	SCN2A	sodium channel, voltage-gated, type II, alpha subunit								TGGAAA_NFAT_Q4_01
5997	RGS2	regulator of G-protein signaling 2, 24kDa								TGGAAA_NFAT_Q4_01
291	SLC25A4	solute carrier family 25 (mitochondrial carrier; adenine nucleotide translocator), member 4								TGGAAA_NFAT_Q4_01
51109	RDH11	retinol dehydrogenase 11 (all-trans/9-cis/11-cis)								TGGAAA_NFAT_Q4_01
6320	CLEC11A	C-type lectin domain family 11, member A								TGGAAA_NFAT_Q4_01
57720	GPR107	G protein-coupled receptor 107								TGGAAA_NFAT_Q4_01
6424	SFRP4	secreted frizzled-related protein 4								TGGAAA_NFAT_Q4_01
10203	CALCRL	calcitonin receptor-like								TGGAAA_NFAT_Q4_01
25977	NECAP1	NECAP endocytosis associated 1								TGGAAA_NFAT_Q4_01
408263	FNDC9	fibronectin type III domain containing 9								TGGAAA_NFAT_Q4_01
51294	PCDH12	protocadherin 12								TGGAAA_NFAT_Q4_01
56138	PCDHA11	protocadherin alpha 11								TGGAAA_NFAT_Q4_01
5406	PNLIP	pancreatic lipase								TGGAAA_NFAT_Q4_01
3355	HTR1F	5-hydroxytryptamine (serotonin) receptor 1F								TGGAAA_NFAT_Q4_01
80108	ZFP2	zinc finger protein 2 homolog (mouse)								TGGAAA_NFAT_Q4_01
8516	ITGA8	integrin, alpha 8								TGGAAA_NFAT_Q4_01
3987	LIMS1	LIM and senescent cell antigen-like domains 1								TGGAAA_NFAT_Q4_01
84617	TUBB6	tubulin, beta 6 class V								TGGAAA_NFAT_Q4_01
8417	STX7	syntaxin 7								TGGAAA_NFAT_Q4_01
6871	TADA2A	transcriptional adaptor 2A								TGGAAA_NFAT_Q4_01
57136	C20orf3	chromosome 20 open reading frame 3								TGGAAA_NFAT_Q4_01
115727	RASGRP4	RAS guanyl releasing protein 4								TGGAAA_NFAT_Q4_01
1363	CPE	carboxypeptidase E								TGGAAA_NFAT_Q4_01
6503	SLA	Src-like-adaptor								TGGAAA_NFAT_Q4_01
5803	PTPRZ1	protein tyrosine phosphatase, receptor-type, Z polypeptide 1								TGGAAA_NFAT_Q4_01
200132	TCTEX1D1	Tctex1 domain containing 1								TGGAAA_NFAT_Q4_01
94121	SYTL4	synaptotagmin-like 4								TGGAAA_NFAT_Q4_01
83715	ESPN	espin								TGGAAA_NFAT_Q4_01
116328	C8orf34	chromosome 8 open reading frame 34								TGGAAA_NFAT_Q4_01
56136	PCDHA13	protocadherin alpha 13								TGGAAA_NFAT_Q4_01
23639	LRRC6	leucine rich repeat containing 6								TGGAAA_NFAT_Q4_01
64792	RABL5	RAB, member RAS oncogene family-like 5								TGGAAA_NFAT_Q4_01
115557	ARHGEF25	Rho guanine nucleotide exchange factor (GEF) 25								TGGAAA_NFAT_Q4_01
1787	TRDMT1	tRNA aspartic acid methyltransferase 1								TGGAAA_NFAT_Q4_01
3156	HMGCR	3-hydroxy-3-methylglutaryl-CoA reductase								TGGAAA_NFAT_Q4_01
57488	ESYT2	extended synaptotagmin-like protein 2								TGGAAA_NFAT_Q4_01
9488	PIGB	phosphatidylinositol glycan anchor biosynthesis, class B								TGGAAA_NFAT_Q4_01
528	ATP6V1C1	ATPase, H+ transporting, lysosomal 42kDa, V1 subunit C1									CAGCTG_AP4_Q5
54472	TOLLIP	toll interacting protein									CAGCTG_AP4_Q5
27175	TUBG2	tubulin, gamma 2									CAGCTG_AP4_Q5
146433	IL34	interleukin 34									CAGCTG_AP4_Q5
27153	ZNF777	zinc finger protein 777									CAGCTG_AP4_Q5
3265	HRAS	v-Ha-ras Harvey rat sarcoma viral oncogene homolog									CAGCTG_AP4_Q5
5607	MAP2K5	mitogen-activated protein kinase kinase 5									CAGCTG_AP4_Q5
90993	CREB3L1	cAMP responsive element binding protein 3-like 1									CAGCTG_AP4_Q5
51006	SLC35C2	solute carrier family 35, member C2									CAGCTG_AP4_Q5
9240	PNMA1	paraneoplastic antigen MA1									CAGCTG_AP4_Q5
1436	CSF1R	colony stimulating factor 1 receptor									CAGCTG_AP4_Q5
8291	DYSF	dysferlin, limb girdle muscular dystrophy 2B (autosomal recessive)									CAGCTG_AP4_Q5
6059	ABCE1	ATP-binding cassette, sub-family E (OABP), member 1									CAGCTG_AP4_Q5
27343	POLL	polymerase (DNA directed), lambda									CAGCTG_AP4_Q5
9211	LGI1	leucine-rich, glioma inactivated 1									CAGCTG_AP4_Q5
91694	LONRF1	LON peptidase N-terminal domain and ring finger 1									CAGCTG_AP4_Q5
148738	HFE2	hemochromatosis type 2 (juvenile)									CAGCTG_AP4_Q5
80230	RUFY1	RUN and FYVE domain containing 1									CAGCTG_AP4_Q5
10184	LHFPL2	lipoma HMGIC fusion partner-like 2									CAGCTG_AP4_Q5
222962	SLC29A4	solute carrier family 29 (nucleoside transporters), member 4									CAGCTG_AP4_Q5
79007	DBNDD1	dysbindin (dystrobrevin binding protein 1) domain containing 1									CAGCTG_AP4_Q5
779	CACNA1S	calcium channel, voltage-dependent, L type, alpha 1S subunit									CAGCTG_AP4_Q5
113177	IZUMO4	IZUMO family member 4									CAGCTG_AP4_Q5
50485	SMARCAL1	SWI/SNF related, matrix associated, actin dependent regulator of chromatin, subfamily a-like 1									CAGCTG_AP4_Q5
25945	PVRL3	poliovirus receptor-related 3									CAGCTG_AP4_Q5
4796	TONSL	tonsoku-like, DNA repair protein									CAGCTG_AP4_Q5
5191	PEX7	peroxisomal biogenesis factor 7									CAGCTG_AP4_Q5
5371	PML	promyelocytic leukemia									CAGCTG_AP4_Q5
51533	PHF7	PHD finger protein 7									CAGCTG_AP4_Q5
8314	BAP1	BRCA1 associated protein-1 (ubiquitin carboxy-terminal hydrolase)									CAGCTG_AP4_Q5
495	ATP4A	ATPase, H+/K+ exchanging, alpha polypeptide									CAGCTG_AP4_Q5
3361	HTR5A	5-hydroxytryptamine (serotonin) receptor 5A									CAGCTG_AP4_Q5
339145	FAM92B	family with sequence similarity 92, member B									CAGCTG_AP4_Q5
11240	PADI2	peptidyl arginine deiminase, type II									CAGCTG_AP4_Q5
282973	JAKMIP3	Janus kinase and microtubule interacting protein 3									CAGCTG_AP4_Q5
6509	SLC1A4	solute carrier family 1 (glutamate/neutral amino acid transporter), member 4									CAGCTG_AP4_Q5
22937	SCAP	SREBF chaperone									CAGCTG_AP4_Q5
5507	PPP1R3C	protein phosphatase 1, regulatory subunit 3C										GATTGGY_NFY_Q6_01
84515	MCM8	minichromosome maintenance complex component 8										GATTGGY_NFY_Q6_01
10528	NOP56	NOP56 ribonucleoprotein homolog (yeast)										GATTGGY_NFY_Q6_01
64782	AEN	apoptosis enhancing nuclease										GATTGGY_NFY_Q6_01
6309	SC5DL	sterol-C5-desaturase (ERG3 delta-5-desaturase homolog, S. cerevisiae)-like										GATTGGY_NFY_Q6_01
774	CACNA1B	calcium channel, voltage-dependent, N type, alpha 1B subunit										GATTGGY_NFY_Q6_01
3006	HIST1H1C	histone cluster 1, H1c										GATTGGY_NFY_Q6_01
4292	MLH1	mutL homolog 1, colon cancer, nonpolyposis type 2 (E. coli)										GATTGGY_NFY_Q6_01
26122	EPC2	enhancer of polycomb homolog 2 (Drosophila)										GATTGGY_NFY_Q6_01
84364	ARFGAP2	ADP-ribosylation factor GTPase activating protein 2										GATTGGY_NFY_Q6_01
90204	ZSWIM1	zinc finger, SWIM-type containing 1										GATTGGY_NFY_Q6_01
1489	CTF1	cardiotrophin 1										GATTGGY_NFY_Q6_01
3028	HSD17B10	hydroxysteroid (17-beta) dehydrogenase 10										GATTGGY_NFY_Q6_01
7353	UFD1L	ubiquitin fusion degradation 1 like (yeast)										GATTGGY_NFY_Q6_01
22974	TPX2	TPX2, microtubule-associated, homolog (Xenopus laevis)										GATTGGY_NFY_Q6_01
699	BUB1	budding uninhibited by benzimidazoles 1 homolog (yeast)										GATTGGY_NFY_Q6_01
342125	TMC3	transmembrane channel-like 3										GATTGGY_NFY_Q6_01
9493	KIF23	kinesin family member 23										GATTGGY_NFY_Q6_01
57405	SPC25	SPC25, NDC80 kinetochore complex component, homolog (S. cerevisiae)										GATTGGY_NFY_Q6_01
9700	ESPL1	extra spindle pole bodies homolog 1 (S. cerevisiae)										GATTGGY_NFY_Q6_01
54841	BIVM	basic, immunoglobulin-like variable motif containing										GATTGGY_NFY_Q6_01
23512	SUZ12	suppressor of zeste 12 homolog (Drosophila)										GATTGGY_NFY_Q6_01
10314	LANCL1	LanC lantibiotic synthetase component C-like 1 (bacterial)										GATTGGY_NFY_Q6_01
92815	HIST3H2A	histone cluster 3, H2a										GATTGGY_NFY_Q6_01
9677	PPIP5K1	diphosphoinositol pentakisphosphate kinase 1										GATTGGY_NFY_Q6_01
51409	HEMK1	HemK methyltransferase family member 1										GATTGGY_NFY_Q6_01
94005	PIGS	phosphatidylinositol glycan anchor biosynthesis, class S										GATTGGY_NFY_Q6_01
92797	HELB	helicase (DNA) B										GATTGGY_NFY_Q6_01
3134	HLA-F	major histocompatibility complex, class I, F										GATTGGY_NFY_Q6_01
90624	LYRM7	Lyrm7 homolog (mouse)										GATTGGY_NFY_Q6_01
245711	SPDYA	speedy homolog A (Xenopus laevis)										GATTGGY_NFY_Q6_01
92703	TMEM183A	transmembrane protein 183A										GATTGGY_NFY_Q6_01
10229	COQ7	coenzyme Q7 homolog, ubiquinone (yeast)										GATTGGY_NFY_Q6_01
3712	IVD	isovaleryl-CoA dehydrogenase										GATTGGY_NFY_Q6_01
54938	SARS2	seryl-tRNA synthetase 2, mitochondrial										GATTGGY_NFY_Q6_01
11153	FICD	FIC domain containing										GATTGGY_NFY_Q6_01
84900	RNFT2	ring finger protein, transmembrane 2										GATTGGY_NFY_Q6_01
23087	TRIM35	tripartite motif containing 35										GATTGGY_NFY_Q6_01
50814	NSDHL	NAD(P) dependent steroid dehydrogenase-like										GATTGGY_NFY_Q6_01
54478	FAM64A	family with sequence similarity 64, member A										GATTGGY_NFY_Q6_01
55764	IFT122	intraflagellar transport 122 homolog (Chlamydomonas)										GATTGGY_NFY_Q6_01
93436	ARMC6	armadillo repeat containing 6
8722	CTSF	cathepsin F
55228	PNMAL1	PNMA-like 1
814	CAMK4	calcium/calmodulin-dependent protein kinase IV
56905	C15orf39	chromosome 15 open reading frame 39
3995	FADS3	fatty acid desaturase 3
11196	SEC23IP	SEC23 interacting protein
7249	TSC2	tuberous sclerosis 2
1933	EEF1B2	eukaryotic translation elongation factor 1 beta 2
51264	MRPL27	mitochondrial ribosomal protein L27
9343	EFTUD2	elongation factor Tu GTP binding domain containing 2
388389	CCDC103	coiled-coil domain containing 103
79922	MRM1	mitochondrial rRNA methyltransferase 1 homolog (S. cerevisiae)
84656	GLYR1	glyoxylate reductase 1 homolog (Arabidopsis)
11245	GPR176	G protein-coupled receptor 176
10645	CAMKK2	calcium/calmodulin-dependent protein kinase kinase 2, beta
6574	SLC20A1	solute carrier family 20 (phosphate transporter), member 1
6205	RPS11	ribosomal protein S11
53919	SLCO1C1	solute carrier organic anion transporter family, member 1C1
4817	NIT1	nitrilase 1
23521	RPL13A	ribosomal protein L13a
25996	REXO2	REX2, RNA exonuclease 2 homolog (S. cerevisiae)
4799	NFX1	nuclear transcription factor, X-box binding 1
3939	LDHA	lactate dehydrogenase A
5883	RAD9A	RAD9 homolog A (S. pombe)
151648	SGOL1	shugoshin-like 1 (S. pombe)
55638	SYBU	syntabulin (syntaxin-interacting)
9361	LONP1	lon peptidase 1, mitochondrial
11128	POLR3A	polymerase (RNA) III (DNA directed) polypeptide A, 155kDa
29078	NDUFAF4	NADH dehydrogenase (ubiquinone) 1 alpha subcomplex, assembly factor 4
10669	CGREF1	cell growth regulator with EF-hand domain 1
84572	GNPTG	N-acetylglucosamine-1-phosphate transferase, gamma subunit
10376	TUBA1B	tubulin, alpha 1b
6638	SNRPN	small nuclear ribonucleoprotein polypeptide N
8926	SNURF	SNRPN upstream reading frame
7181	NR2C1	nuclear receptor subfamily 2, group C, member 1
5876	RABGGTB	Rab geranylgeranyltransferase, beta subunit
222068	TMED4	transmembrane emp24 protein transport domain containing 4
8883	NAE1	NEDD8 activating enzyme E1 subunit 1
64223	MLST8	MTOR associated protein, LST8 homolog (S. cerevisiae)
114823	LENG8	leukocyte receptor cluster (LRC) member 8
9774	BCLAF1	BCL2-associated transcription factor 1
8569	MKNK1	MAP kinase interacting serine/threonine kinase 1
3161	HMMR	hyaluronan-mediated motility receptor (RHAMM)
140461	ASB8	ankyrin repeat and SOCS box containing 8
79172	CENPO	centromere protein O
57539	WDR35	WD repeat domain 35
26052	DNM3	dynamin 3
8891	EIF2B3	eukaryotic translation initiation factor 2B, subunit 3 gamma, 58kDa
23741	EID1	EP300 interacting inhibitor of differentiation 1
23463	ICMT	isoprenylcysteine carboxyl methyltransferase
119504	ANAPC16	anaphase promoting complex subunit 16
154791	C7orf55	chromosome 7 open reading frame 55
10467	ZNHIT1	zinc finger, HIT-type containing 1
55345	C4orf21	chromosome 4 open reading frame 21
6625	SNRNP70	small nuclear ribonucleoprotein 70kDa (U1)
3094	HINT1	histidine triad nucleotide binding protein 1
115024	NT5C3L	5'-nucleotidase, cytosolic III-like
126272	EID2B	EP300 interacting inhibitor of differentiation 2B
84911	ZNF382	zinc finger protein 382
54859	C3orf75	chromosome 3 open reading frame 75
11214	AKAP13	A kinase (PRKA) anchor protein 13
539	ATP5O	ATP synthase, H+ transporting, mitochondrial F1 complex, O subunit
78992	YIPF2	Yip1 domain family, member 2
90580	C19orf52	chromosome 19 open reading frame 52
3836	KPNA1	karyopherin alpha 1 (importin alpha 5)
10898	CPSF4	cleavage and polyadenylation specific factor 4, 30kDa
125476	INO80C	INO80 complex subunit C
11340	EXOSC8	exosome component 8
79133	C20orf7	chromosome 20 open reading frame 7
51491	NOP16	NOP16 nucleolar protein homolog (yeast)
114822	RHPN1	rhophilin, Rho GTPase binding protein 1
4085	MAD2L1	MAD2 mitotic arrest deficient-like 1 (yeast)
51119	SBDS	Shwachman-Bodian-Diamond syndrome
55347	ABHD10	abhydrolase domain containing 10
57184	C15orf17	chromosome 15 open reading frame 17
64965	MRPS9	mitochondrial ribosomal protein S9
8089	YEATS4	YEATS domain containing 4
874	CBR3	carbonyl reductase 3
65059	RAPH1	Ras association (RalGDS/AF-6) and pleckstrin homology domains 1
2893	GRIA4	glutamate receptor, ionotrophic, AMPA 4
56997	ADCK3	aarF domain containing kinase 3
56121	PCDHB15	protocadherin beta 15
56131	PCDHB4	protocadherin beta 4
2997	GYS1	glycogen synthase 1 (muscle)
9619	ABCG1	ATP-binding cassette, sub-family G (WHITE), member 1
256281	NUDT14	nudix (nucleoside diphosphate linked moiety X)-type motif 14
26167	PCDHB5	protocadherin beta 5
56124	PCDHB12	protocadherin beta 12
7070	THY1	Thy-1 cell surface antigen
66008	TRAK2	trafficking protein, kinesin binding 2
84085	FBXO30	F-box protein 30
7388	UQCRH	ubiquinol-cytochrome c reductase hinge protein
7171	TPM4	tropomyosin 4
8476	CDC42BPA	CDC42 binding protein kinase alpha (DMPK-like)
55715	DOK4	docking protein 4
23129	PLXND1	plexin D1
107	ADCY1	adenylate cyclase 1 (brain)
51277	DNAJC27	DnaJ (Hsp40) homolog, subfamily C, member 27
150465	TTL	tubulin tyrosine ligase
51286	CEND1	cell cycle exit and neuronal differentiation 1
80714	PBX4	pre-B-cell leukemia homeobox 4
29028	ATAD2	ATPase family, AAA domain containing 2
6182	MRPL12	mitochondrial ribosomal protein L12
5464	PPA1	pyrophosphatase (inorganic) 1
84699	CREB3L3	cAMP responsive element binding protein 3-like 3
9780	PIEZO1	piezo-type mechanosensitive ion channel component 1
84334	APOPT1	apoptogenic 1
38	ACAT1	acetyl-CoA acetyltransferase 1
9950	GOLGA5	golgin A5
283212	KLHL35	kelch-like 35 (Drosophila)
25809	TTLL1	tubulin tyrosine ligase-like family, member 1
56255	TMX4	thioredoxin-related transmembrane protein 4
857	CAV1	caveolin 1, caveolae protein, 22kDa
51642	MRPL48	mitochondrial ribosomal protein L48
686	BTD	biotinidase
285195	SLC9A9	solute carrier family 9 (sodium/hydrogen exchanger), member 9
64072	CDH23	cadherin-related 23
54629	FAM63B	family with sequence similarity 63, member B
79912	PYROXD1	pyridine nucleotide-disulphide oxidoreductase domain 1
6241	RRM2	ribonucleotide reductase M2
79139	DERL1	Der1-like domain family, member 1
3038	HAS3	hyaluronan synthase 3
23596	OPN3	opsin 3
139341	FUNDC1	FUN14 domain containing 1
5160	PDHA1	pyruvate dehydrogenase (lipoamide) alpha 1
83732	RIOK1	RIO kinase 1 (yeast)
5287	PIK3C2B	phosphoinositide-3-kinase, class 2, beta polypeptide
10135	NAMPT	nicotinamide phosphoribosyltransferase
150483	TEKT4	tektin 4
80119	PIF1	PIF1 5'-to-3' DNA helicase homolog (S. cerevisiae)
131831	FAM194A	family with sequence similarity 194, member A
4798	NFRKB	nuclear factor related to kappaB binding protein
196264	MPZL3	myelin protein zero-like 3
23090	ZNF423	zinc finger protein 423
25980	C20orf4	chromosome 20 open reading frame 4
58533	SNX6	sorting nexin 6
57110	HRASLS	HRAS-like suppressor
4430	MYO1B	myosin IB
4887	NPY2R	neuropeptide Y receptor Y2
767	CA8	carbonic anhydrase VIII
155435	RBM33	RNA binding motif protein 33
283742	FAM98B	family with sequence similarity 98, member B
23051	ZHX3	zinc fingers and homeoboxes 3
80177	MYCT1	myc target 1
130271	PLEKHH2	pleckstrin homology domain containing, family H (with MyTH4 domain) member 2
10744	PTTG2	pituitary tumor-transforming 2
93010	B3GNT7	UDP-GlcNAc:betaGal beta-1,3-N-acetylglucosaminyltransferase 7
57381	RHOJ	ras homolog gene family, member J
5660	PSAP	prosaposin
51703	ACSL5	acyl-CoA synthetase long-chain family member 5
4064	CD180	CD180 molecule
4067	LYN	v-yes-1 Yamaguchi sarcoma viral related oncogene homolog
89845	ABCC10	ATP-binding cassette, sub-family C (CFTR/MRP), member 10
393	ARHGAP4	Rho GTPase activating protein 4
30849	PIK3R4	phosphoinositide-3-kinase, regulatory subunit 4
53827	FXYD5	FXYD domain containing ion transport regulator 5
26504	CNNM4	cyclin M4
84817	TXNDC17	thioredoxin domain containing 17
5788	PTPRC	protein tyrosine phosphatase, receptor type, C
92822	ZNF276	zinc finger protein 276
79570	NKAIN1	Na+/K+ transporting ATPase interacting 1
6575	SLC20A2	solute carrier family 20 (phosphate transporter), member 2
1524	CX3CR1	chemokine (C-X3-C motif) receptor 1
4299	AFF1	AF4/FMR2 family, member 1
25927	CNRIP1	cannabinoid receptor interacting protein 1
1725	DHPS	deoxyhypusine synthase
83878	USHBP1	Usher syndrome 1C binding protein 1
54978	C2orf18	chromosome 2 open reading frame 18
79056	PRRG4	proline rich Gla (G-carboxyglutamic acid) 4 (transmembrane)
122042	RXFP2	relaxin/insulin-like family peptide receptor 2
66004	LYNX1	Ly6/neurotoxin 1
1463	NCAN	neurocan
4830	NME1	non-metastatic cells 1, protein (NM23A) expressed in
8682	PEA15	phosphoprotein enriched in astrocytes 15
1200	TPP1	tripeptidyl peptidase I
1687	DFNA5	deafness, autosomal dominant 5
6772	STAT1	signal transducer and activator of transcription 1, 91kDa
27097	TAF5L	TAF5-like RNA polymerase II, p300/CBP-associated factor (PCAF)-associated factor, 65kDa
6222	RPS18	ribosomal protein S18
6293	VPS52	vacuolar protein sorting 52 homolog (S. cerevisiae)
9804	TOMM20	translocase of outer mitochondrial membrane 20 homolog (yeast)
343450	KCNT2	potassium channel, subfamily T, member 2
284131	ENDOV	endonuclease V
25904	CNOT10	CCR4-NOT transcription complex, subunit 10
51202	DDX47	DEAD (Asp-Glu-Ala-Asp) box polypeptide 47
2773	GNAI3	guanine nucleotide binding protein (G protein), alpha inhibiting activity polypeptide 3
9406	ZRANB2	zinc finger, RAN-binding domain containing 2
1716	DGUOK	deoxyguanosine kinase
1355	COX15	COX15 homolog, cytochrome c oxidase assembly protein (yeast)
55165	CEP55	centrosomal protein 55kDa
79753	SNIP1	Smad nuclear interacting protein 1
80185	TTI2	Tel2 interacting protein 2 homolog (S. pombe)
91949	COG7	component of oligomeric golgi complex 7
118813	ZFYVE27	zinc finger, FYVE domain containing 27
10188	TNK2	tyrosine kinase, non-receptor, 2
54974	THG1L	tRNA-histidine guanylyltransferase 1-like (S. cerevisiae)
7109	TRAPPC10	trafficking protein particle complex 10
79876	UBA5	ubiquitin-like modifier activating enzyme 5
55164	SHQ1	SHQ1 homolog (S. cerevisiae)
53339	BTBD1	BTB (POZ) domain containing 1
54856	GON4L	gon-4-like (C. elegans)
23283	CSTF2T	cleavage stimulation factor, 3' pre-RNA, subunit 2, 64kDa, tau variant
5929	RBBP5	retinoblastoma binding protein 5
55173	MRPS10	mitochondrial ribosomal protein S10
124401	ANKS3	ankyrin repeat and sterile alpha motif domain containing 3
5373	PMM2	phosphomannomutase 2
55738	ARFGAP1	ADP-ribosylation factor GTPase activating protein 1
81545	FBXO38	F-box protein 38
10054	UBA2	ubiquitin-like modifier activating enzyme 2
192111	PGAM5	phosphoglycerate mutase family member 5
51399	TRAPPC4	trafficking protein particle complex 4
6742	SSBP1	single-stranded DNA binding protein 1
6905	TBCE	tubulin folding cofactor E
10926	DBF4	DBF4 homolog (S. cerevisiae)
23762	OSBP2	oxysterol binding protein 2
10178	ODZ1	odz, odd Oz/ten-m homolog 1 (Drosophila)
10569	SLU7	SLU7 splicing factor homolog (S. cerevisiae)
54463	FAM134B	family with sequence similarity 134, member B
116238	TLCD1	TLC domain containing 1
8720	MBTPS1	membrane-bound transcription factor peptidase, site 1
338692	ANKRD13D	ankyrin repeat domain 13 family, member D
963	CD53	CD53 molecule
84940	CORO6	coronin 6
2888	GRB14	growth factor receptor-bound protein 14
157753	TMEM74	transmembrane protein 74
283446	MYO1H	myosin IH
117248	GALNTL2	UDP-N-acetyl-alpha-D-galactosamine:polypeptide N-acetylgalactosaminyltransferase-like 2
3857	KRT9	keratin 9
126308	MOB3A	MOB kinase activator 3A
51696	HECA	headcase homolog (Drosophila)
388591	RNF207	ring finger protein 207
55591	VEZT	vezatin, adherens junctions transmembrane protein
3158	HMGCS2	3-hydroxy-3-methylglutaryl-CoA synthase 2 (mitochondrial)
54205	CYCS	cytochrome c, somatic
10637	LEFTY1	left-right determination factor 1
55872	PBK	PDZ binding kinase
401036	ASB18	ankyrin repeat and SOCS box containing 18
823	CAPN1	calpain 1, (mu/I) large subunit
92370	ACPL2	acid phosphatase-like 2
219621	C10orf107	chromosome 10 open reading frame 107
65990	FAM173A	family with sequence similarity 173, member A
5478	PPIA	peptidylprolyl isomerase A (cyclophilin A)
58986	TMEM8A	transmembrane protein 8A
90990	KIFC2	kinesin family member C2
55120	FANCL	Fanconi anemia, complementation group L
133022	TRAM1L1	translocation associated membrane protein 1-like 1
53343	NUDT9	nudix (nucleoside diphosphate linked moiety X)-type motif 9
283209	PGM2L1	phosphoglucomutase 2-like 1
79591	C10orf76	chromosome 10 open reading frame 76
8266	UBL4A	ubiquitin-like 4A
8814	CDKL1	cyclin-dependent kinase-like 1 (CDC2-related kinase)
54537	FAM35A	family with sequence similarity 35, member A
4837	NNMT	nicotinamide N-methyltransferase
4952	OCRL	oculocerebrorenal syndrome of Lowe
23519	ANP32D	acidic (leucine-rich) nuclear phosphoprotein 32 family, member D
5256	PHKA2	phosphorylase kinase, alpha 2 (liver)
23287	AGTPBP1	ATP/GTP binding protein 1
9330	GTF3C3	general transcription factor IIIC, polypeptide 3, 102kDa
55051	C14orf102	chromosome 14 open reading frame 102
4350	MPG	N-methylpurine-DNA glycosylase
51375	SNX7	sorting nexin 7
10206	TRIM13	tripartite motif containing 13
56521	DNAJC12	DnaJ (Hsp40) homolog, subfamily C, member 12
140775	SMCR8	Smith-Magenis syndrome chromosome region, candidate 8
10295	BCKDK	branched chain ketoacid dehydrogenase kinase
10782	ZNF274	zinc finger protein 274
119710	C11orf74	chromosome 11 open reading frame 74
285282	RABL3	RAB, member of RAS oncogene family-like 3
6419	SETMAR	SET domain and mariner transposase fusion gene
57665	RDH14	retinol dehydrogenase 14 (all-trans/9-cis/11-cis)
7593	MZF1	myeloid zinc finger 1
123803	NTAN1	N-terminal asparagine amidase
84153	RNASEH2C	ribonuclease H2, subunit C
55663	ZNF446	zinc finger protein 446
64897	C12orf43	chromosome 12 open reading frame 43
23568	ARL2BP	ADP-ribosylation factor-like 2 binding protein
220108	FAM124A	family with sequence similarity 124A
128989	C22orf25	chromosome 22 open reading frame 25
85439	STON2	stonin 2
199	AIF1	allograft inflammatory factor 1
63899	NSUN3	NOP2/Sun domain family, member 3
26578	OSTF1	osteoclast stimulating factor 1
5954	RCN1	reticulocalbin 1, EF-hand calcium binding domain
55711	FAR2	fatty acyl CoA reductase 2
376940	ZC3H6	zinc finger CCCH-type containing 6
3702	ITK	IL2-inducible T-cell kinase
55665	URGCP	upregulator of cell proliferation
123016	TTC8	tetratricopeptide repeat domain 8
140609	NEK7	NIMA (never in mitosis gene a)-related kinase 7
29775	CARD10	caspase recruitment domain family, member 10
28981	IFT81	intraflagellar transport 81 homolog (Chlamydomonas)
9836	LCMT2	leucine carboxyl methyltransferase 2
64092	SAMSN1	SAM domain, SH3 domain and nuclear localization signals 1
10095	ARPC1B	actin related protein 2/3 complex, subunit 1B, 41kDa
10239	AP3S2	adaptor-related protein complex 3, sigma 2 subunit
3912	LAMB1	laminin, beta 1
3776	KCNK2	potassium channel, subfamily K, member 2
79745	CLIP4	CAP-GLY domain containing linker protein family, member 4
51227	PIGP	phosphatidylinositol glycan anchor biosynthesis, class P
164592	CCDC116	coiled-coil domain containing 116
79957	PAQR6	progestin and adipoQ receptor family member VI
4205	MEF2A	myocyte enhancer factor 2A
64145	ZFYVE20	zinc finger, FYVE domain containing 20
259232	NALCN	sodium leak channel, non-selective
84264	HAGHL	hydroxyacylglutathione hydrolase-like
119587	CPXM2	carboxypeptidase X (M14 family), member 2
54942	FAM206A	family with sequence similarity 206, member A
57106	NAT14	N-acetyltransferase 14 (GCN5-related, putative)
51251	NT5C3	5'-nucleotidase, cytosolic III
4637	MYL6	myosin, light chain 6, alkali, smooth muscle and non-muscle
55846	ITFG2	integrin alpha FG-GAP repeat containing 2
57082	CASC5	cancer susceptibility candidate 5
11097	NUPL2	nucleoporin like 2
5889	RAD51C	RAD51 homolog C (S. cerevisiae)
59349	KLHL12	kelch-like 12 (Drosophila)
285782	CAGE1	cancer antigen 1
8500	PPFIA1	protein tyrosine phosphatase, receptor type, f polypeptide (PTPRF), interacting protein (liprin), alpha 1
170261	ZCCHC12	zinc finger, CCHC domain containing 12
22800	RRAS2	related RAS viral (r-ras) oncogene homolog 2
23435	TARDBP	TAR DNA binding protein
92126	DSEL	dermatan sulfate epimerase-like
1315	COPB1	coatomer protein complex, subunit beta 1
123745	PLA2G4E	phospholipase A2, group IVE
8216	LZTR1	leucine-zipper-like transcription regulator 1
25914	RTTN	rotatin
10025	MED16	mediator complex subunit 16
83591	THAP2	THAP domain containing, apoptosis associated protein 2
55069	C7orf42	chromosome 7 open reading frame 42
27148	STK36	serine/threonine kinase 36
10675	CSPG5	chondroitin sulfate proteoglycan 5 (neuroglycan C)
55280	CWF19L1	CWF19-like 1, cell cycle control (S. pombe)
90288	C3orf25	chromosome 3 open reading frame 25
26995	TRUB2	TruB pseudouridine (psi) synthase homolog 2 (E. coli)
81611	ANP32E	acidic (leucine-rich) nuclear phosphoprotein 32 family, member E
219293	ATAD3C	ATPase family, AAA domain containing 3C
2173	FABP7	fatty acid binding protein 7, brain
10484	SEC23A	Sec23 homolog A (S. cerevisiae)
2060	EPS15	epidermal growth factor receptor pathway substrate 15
126789	PUSL1	pseudouridylate synthase-like 1
221120	ALKBH3	alkB, alkylation repair homolog 3 (E. coli)
79953	SYNDIG1	synapse differentiation inducing 1
11332	ACOT7	acyl-CoA thioesterase 7
91647	ATPAF2	ATP synthase mitochondrial F1 complex assembly factor 2
5898	RALA	v-ral simian leukemia viral oncogene homolog A (ras related)
133308	SLC9B2	solute carrier family 9, subfamily B (cation proton antiporter 2), member 2
1528	CYB5A	cytochrome b5 type A (microsomal)
53346	TM6SF1	transmembrane 6 superfamily member 1
8706	B3GALNT1	beta-1,3-N-acetylgalactosaminyltransferase 1 (globoside blood group)
119032	C10orf32	chromosome 10 open reading frame 32
10575	CCT4	chaperonin containing TCP1, subunit 4 (delta)
3340	NDST1	N-deacetylase/N-sulfotransferase (heparan glucosaminyl) 1
84286	TMEM175	transmembrane protein 175
7915	ALDH5A1	aldehyde dehydrogenase 5 family, member A1
57724	EPG5	ectopic P-granules autophagy protein 5 homolog (C. elegans)
4199	ME1	malic enzyme 1, NADP(+)-dependent, cytosolic
58504	ARHGAP22	Rho GTPase activating protein 22
115353	LRRC42	leucine rich repeat containing 42
283232	TMEM80	transmembrane protein 80
55286	C4orf19	chromosome 4 open reading frame 19
112487	C14orf126	chromosome 14 open reading frame 126
363	AQP6	aquaporin 6, kidney specific
55922	NKRF	NFKB repressing factor
196951	C15orf33	chromosome 15 open reading frame 33
23113	CUL9	cullin 9
9032	TM4SF5	transmembrane 4 L six family member 5
1062	CENPE	centromere protein E, 312kDa
8021	NUP214	nucleoporin 214kDa
133015	PACRGL	PARK2 co-regulated-like
8220	DGCR14	DiGeorge syndrome critical region gene 14
126823	KLHDC9	kelch domain containing 9
64130	LIN7B	lin-7 homolog B (C. elegans)
10815	CPLX1	complexin 1
29940	DSE	dermatan sulfate epimerase
259266	ASPM	asp (abnormal spindle) homolog, microcephaly associated (Drosophila)
134353	LSM11	LSM11, U7 small nuclear RNA associated
23683	PRKD3	protein kinase D3
2487	FRZB	frizzled-related protein
3680	ITGA9	integrin, alpha 9
147948	ZNF582	zinc finger protein 582
91544	UBXN11	UBX domain protein 11
9787	DLGAP5	discs, large (Drosophila) homolog-associated protein 5
84193	SETD3	SET domain containing 3
57231	SNX14	sorting nexin 14
11194	ABCB8	ATP-binding cassette, sub-family B (MDR/TAP), member 8
1212	CLTB	clathrin, light chain B
2548	GAA	glucosidase, alpha; acid
145553	MDP1	magnesium-dependent phosphatase 1
23597	ACOT9	acyl-CoA thioesterase 9
5356	PLRG1	pleiotropic regulator 1
2664	GDI1	GDP dissociation inhibitor 1
401152	C4orf3	chromosome 4 open reading frame 3
349565	NMNAT3	nicotinamide nucleotide adenylyltransferase 3
84215	ZNF541	zinc finger protein 541
64318	NOC3L	nucleolar complex associated 3 homolog (S. cerevisiae)
6009	RHEB	Ras homolog enriched in brain
9375	TM9SF2	transmembrane 9 superfamily member 2
79738	BBS10	Bardet-Biedl syndrome 10
583	BBS2	Bardet-Biedl syndrome 2
124995	MRPL10	mitochondrial ribosomal protein L10
7466	WFS1	Wolfram syndrome 1 (wolframin)
144195	SLC2A14	solute carrier family 2 (facilitated glucose transporter), member 14
339416	ANKRD45	ankyrin repeat domain 45
154881	KCTD7	potassium channel tetramerisation domain containing 7
91942	NDUFAF2	NADH dehydrogenase (ubiquinone) 1 alpha subcomplex, assembly factor 2
83862	TMEM120A	transmembrane protein 120A
84326	C16orf13	chromosome 16 open reading frame 13
9554	SEC22B	SEC22 vesicle trafficking protein homolog B (S. cerevisiae) (gene/pseudogene)
4172	MCM3	minichromosome maintenance complex component 3
9768	KIAA0101	KIAA0101
64077	LHPP	phospholysine phosphohistidine inorganic pyrophosphate phosphatase
55526	DHTKD1	dehydrogenase E1 and transketolase domain containing 1
11133	KPTN	kaptin (actin binding protein)
4123	MAN2C1	mannosidase, alpha, class 2C, member 1
9332	CD163	CD163 molecule
122402	TDRD9	tudor domain containing 9
9450	LY86	lymphocyte antigen 86
56006	SMG9	smg-9 homolog, nonsense mediated mRNA decay factor (C. elegans)
9715	FAM131B	family with sequence similarity 131, member B
57455	REXO1	REX1, RNA exonuclease 1 homolog (S. cerevisiae)
93973	ACTR8	ARP8 actin-related protein 8 homolog (yeast)
56339	METTL3	methyltransferase like 3
24145	PANX1	pannexin 1
2621	GAS6	growth arrest-specific 6
2821	GPI	glucose-6-phosphate isomerase
93589	CACNA2D4	calcium channel, voltage-dependent, alpha 2/delta subunit 4
25903	OLFML2B	olfactomedin-like 2B
25957	PNISR	PNN-interacting serine/arginine-rich protein
631	BFSP1	beaded filament structural protein 1, filensin
285605	DTWD2	DTW domain containing 2
1466	CSRP2	cysteine and glycine-rich protein 2
30833	NT5C	5', 3'-nucleotidase, cytosolic
90268	FAM105B	family with sequence similarity 105, member B
57698	KIAA1598	KIAA1598
92002	FAM58A	family with sequence similarity 58, member A
93974	ATPIF1	ATPase inhibitory factor 1
84749	USP30	ubiquitin specific peptidase 30
2305	FOXM1	forkhead box M1
254887	ZDHHC23	zinc finger, DHHC-type containing 23
387032	ZKSCAN4	zinc finger with KRAB and SCAN domains 4
93210	PGAP3	post-GPI attachment to proteins 3
8997	KALRN	kalirin, RhoGEF kinase
51177	PLEKHO1	pleckstrin homology domain containing, family O member 1
81567	TXNDC5	thioredoxin domain containing 5 (endoplasmic reticulum)
55082	ARGLU1	arginine and glutamate rich 1
51008	ASCC1	activating signal cointegrator 1 complex subunit 1
9752	PCDHA9	protocadherin alpha 9
59284	CACNG7	calcium channel, voltage-dependent, gamma subunit 7
6890	TAP1	transporter 1, ATP-binding cassette, sub-family B (MDR/TAP)
55149	MTPAP	mitochondrial poly(A) polymerase
29074	MRPL18	mitochondrial ribosomal protein L18
286826	LIN9	lin-9 homolog (C. elegans)
56145	PCDHA3	protocadherin alpha 3
10399	GNB2L1	guanine nucleotide binding protein (G protein), beta polypeptide 2-like 1
342538	NACA2	nascent polypeptide-associated complex alpha subunit 2
891	CCNB1	cyclin B1
56666	PANX2	pannexin 2
23132	RAD54L2	RAD54-like 2 (S. cerevisiae)
112609	MRAP2	melanocortin 2 receptor accessory protein 2
51016	FAM158A	family with sequence similarity 158, member A
653361	NCF1	neutrophil cytosolic factor 1
340351	AGBL3	ATP/GTP binding protein-like 3
7419	VDAC3	voltage-dependent anion channel 3
80152	CENPT	centromere protein T
6041	RNASEL	ribonuclease L (2',5'-oligoisoadenylate synthetase-dependent)
3832	KIF11	kinesin family member 11
57798	GATAD1	GATA zinc finger domain containing 1
10618	TGOLN2	trans-golgi network protein 2
834	CASP1	caspase 1, apoptosis-related cysteine peptidase (interleukin 1, beta, convertase)
7272	TTK	TTK protein kinase
51729	WBP11	WW domain binding protein 11
2132	EXT2	exostosin 2
3508	IGHMBP2	immunoglobulin mu binding protein 2
9790	BMS1	BMS1 homolog, ribosome assembly protein (yeast)
283985	FADS6	fatty acid desaturase domain family, member 6
100128338	LOC100128338	uncharacterized LOC100128338
100130890	LOC100130890	uncharacterized LOC100130890
100131827	ZNF717	zinc finger protein 717
100170841	C17orf96	chromosome 17 open reading frame 96
100271715	ARHGEF33	Rho guanine nucleotide exchange factor (GEF) 33
100287898	TTC34	tetratricopeptide repeat domain 34
10046	MAMLD1	mastermind-like domain containing 1
100507003	LOC100507003	uncharacterized protein LOC100507003
100507341	LOC100507341	uncharacterized LOC100507341
100526771	LOC100526771	uncharacterized LOC100526771
100526772	TMEM110-MUSTN1	TMEM110-MUSTN1 readthrough
10069	RWDD2B	RWD domain containing 2B
10208	USPL1	ubiquitin specific peptidase like 1
10220	GDF11	growth differentiation factor 11
10251	SPRY3	sprouty homolog 3 (Drosophila)
10254	STAM2	signal transducing adaptor molecule (SH3 domain and ITAM motif) 2
102800317		&nbsp;
1032	CDKN2D	cyclin-dependent kinase inhibitor 2D (p19, inhibits CDK4)
10328	COX4NB	COX4 neighbor
10336	PCGF3	polycomb group ring finger 3
10383	TUBB4B	tubulin, beta 4B class IVb
10454	TAB1	TGF-beta activated kinase 1/MAP3K7 binding protein 1
10464	PIBF1	progesterone immunomodulatory binding factor 1
10541	ANP32B	acidic (leucine-rich) nuclear phosphoprotein 32 family, member B
1058	CENPA	centromere protein A
10665	C6orf10	chromosome 6 open reading frame 10
10687	PNMA2	paraneoplastic antigen MA2
10732	TCFL5	transcription factor-like 5 (basic helix-loop-helix)
10827	FAM114A2	family with sequence similarity 114, member A2
10903	MTMR11	myotubularin related protein 11
10920	COPS8	COP9 constitutive photomorphogenic homolog subunit 8 (Arabidopsis)
10936	GPR75	G protein-coupled receptor 75
11010	GLIPR1	GLI pathogenesis-related 1
11055	ZPBP	zona pellucida binding protein
11078	TRIOBP	TRIO and F-actin binding protein
11130	ZWINT	ZW10 interactor
11190	CEP250	centrosomal protein 250kDa
11230	PRAF2	PRA1 domain family, member 2
112483	SAT2	spermidine/spermine N1-acetyltransferase family member 2
11249	NXPH2	neurexophilin 2
112703	FAM71E1	family with sequence similarity 71, member E1
113130	CDCA5	cell division cycle associated 5
113402	SFT2D1	SFT2 domain containing 1
113451	ADC	arginine decarboxylase
114801	TMEM200A	transmembrane protein 200A
114827	FHAD1	forkhead-associated (FHA) phosphopeptide binding domain 1
114876	OSBPL1A	oxysterol binding protein-like 1A
115330	GPR146	G protein-coupled receptor 146
115548	FCHO2	FCH domain only 2
115708	TRMT61A	tRNA methyltransferase 61 homolog A (S. cerevisiae)
1186	CLCN7	chloride channel 7
119	ADD2	adducin 2 (beta)
122622	ADSSL1	adenylosuccinate synthase like 1
123606	NIPA1	non imprinted in Prader-Willi/Angelman syndrome 1
124411	ZNF720	zinc finger protein 720
124739	USP43	ubiquitin specific peptidase 43
126298	IRGQ	immunity-related GTPase family, Q
126520	PLK5	polo-like kinase 5
126695	C1orf172	chromosome 1 open reading frame 172
127253	TYW3	tRNA-yW synthesizing protein 3 homolog (S. cerevisiae)
127262	TPRG1L	tumor protein p63 regulated 1-like
127579	DCST2	DC-STAMP domain containing 2
128308	MRPL55	mitochondrial ribosomal protein L55
128414	NKAIN4	Na+/K+ transporting ATPase interacting 4
128637	TBC1D20	TBC1 domain family, member 20
128954	GAB4	GRB2-associated binding protein family, member 4
129787	TMEM18	transmembrane protein 18
132158	GLYCTK	glycerate kinase
134121	C5orf49	chromosome 5 open reading frame 49
134829	CLVS2	clavesin 2
136051	ZNF786	zinc finger protein 786
1378	CR1	complement component (3b/4b) receptor 1 (Knops blood group)
138429	PIP5KL1	phosphatidylinositol-4-phosphate 5-kinase-like 1
140699	C20orf132	chromosome 20 open reading frame 132
140700	SAMD10	sterile alpha motif domain containing 10
140873	C20orf173	chromosome 20 open reading frame 173
1429	CRYZ	crystallin, zeta (quinone reductase)
142910	LIPJ	lipase, family member J
143872	ARHGAP42	Rho GTPase activating protein 42
145853	C15orf61	chromosome 15 open reading frame 61
146198	ZFP90	zinc finger protein 90 homolog (mouse)
146754	DNAH2	dynein, axonemal, heavy chain 2
146909	KIF18B	kinesin family member 18B
147179	WIPF2	WAS/WASL interacting protein family, member 2
149483	CCDC17	coiled-coil domain containing 17
150223	YDJC	YdjC homolog (bacterial)
1508	CTSB	cathepsin B
151230	KLHL23	kelch-like 23 (Drosophila)
154215	NKAIN2	Na+/K+ transporting ATPase interacting 2
154790	CLEC2L	C-type lectin domain family 2, member L
155368	WBSCR27	Williams Beuren syndrome chromosome region 27
157570	ESCO2	establishment of cohesion 1 homolog 2 (S. cerevisiae)
158067	AK8	adenylate kinase 8
158135	TTLL11	tubulin tyrosine ligase-like family, member 11
158471	PRUNE2	prune homolog 2 (Drosophila)
161823	ADAL	adenosine deaminase-like
163227	ZNF100	zinc finger protein 100
163404	LPPR5	lipid phosphate phosphatase-related protein type 5
168090	C6orf118	chromosome 6 open reading frame 118
170690	ADAMTS16	ADAM metallopeptidase with thrombospondin type 1 motif, 16
170954	PPP1R18	protein phosphatase 1, regulatory subunit 18
1717	DHCR7	7-dehydrocholesterol reductase
1727	CYB5R3	cytochrome b5 reductase 3
1728	NQO1	NAD(P)H dehydrogenase, quinone 1
1841	DTYMK	deoxythymidylate kinase (thymidylate kinase)
1892	ECHS1	enoyl CoA hydratase, short chain, 1, mitochondrial
196513	DCP1B	DCP1 decapping enzyme homolog B (S. cerevisiae)
196996	GRAMD2	GRAM domain containing 2
197322	ACSF3	acyl-CoA synthetase family member 3
197342	EME2	essential meiotic endonuclease 1 homolog 2 (S. pombe)
199953	TMEM201	transmembrane protein 201
200407	CREG2	cellular repressor of E1A-stimulated genes 2
2013	EMP2	epithelial membrane protein 2
203	AK1	adenylate kinase 1
203522	DDX26B	DEAD/H (Asp-Glu-Ala-Asp/His) box polypeptide 26B
2046	EPHA8	EPH receptor A8
207063	DHRSX	dehydrogenase/reductase (SDR family) X-linked
2171	FABP5	fatty acid binding protein 5 (psoriasis-associated)
219899	TBCEL	tubulin folding cofactor E-like
219972	MPEG1	macrophage expressed 1
221184	CPNE2	copine II
221336	BEND6	BEN domain containing 6
221424	C6orf154	chromosome 6 open reading frame 154
221443	C6orf130	chromosome 6 open reading frame 130
221458	KIF6	kinesin family member 6
222166	C7orf41	chromosome 7 open reading frame 41
222553	SLC35F1	solute carrier family 35, member F1
222658	KCTD20	potassium channel tetramerisation domain containing 20
225689	MAPK15	mitogen-activated protein kinase 15
2281	FKBP1B	FK506 binding protein 1B, 12.6 kDa
22832	KIAA1009	KIAA1009
22835	ZFP30	zinc finger protein 30 homolog (mouse)
22863	ATG14	ATG14 autophagy related 14 homolog (S. cerevisiae)
22881	ANKRD6	ankyrin repeat domain 6
22890	ZBTB1	zinc finger and BTB domain containing 1
22909	FAN1	FANCD2/FANCI-associated nuclease 1
22930	RAB3GAP1	RAB3 GTPase activating protein subunit 1 (catalytic)
23020	SNRNP200	small nuclear ribonucleoprotein 200kDa (U5)
23040	MYT1L	myelin transcription factor 1-like
23046	KIF21B	kinesin family member 21B
23061	TBC1D9B	TBC1 domain family, member 9B (with GRAM domain)
23078	KIAA0564	KIAA0564
23094	SIPA1L3	signal-induced proliferation-associated 1 like 3
23122	CLASP2	cytoplasmic linker associated protein 2
23141	ANKLE2	ankyrin repeat and LEM domain containing 2
23148	NACAD	NAC alpha domain containing
23157	2006-09-01	septin 6
23167	EFR3A	EFR3 homolog A (S. cerevisiae)
23192	ATG4B	ATG4 autophagy related 4 homolog B (S. cerevisiae)
23207	PLEKHM2	pleckstrin homology domain containing, family M (with RUN domain) member 2
23216	TBC1D1	TBC1 (tre-2/USP6, BUB2, cdc16) domain family, member 1
23220	DTX4	deltex homolog 4 (Drosophila)
23247	KIAA0556	KIAA0556
23259	DDHD2	DDHD domain containing 2
23285	KIAA1107	KIAA1107
23300	ATMIN	ATM interactor
23318	ZCCHC11	zinc finger, CCHC domain containing 11
23324	MAN2B2	mannosidase, alpha, class 2B, member 2
23326	USP22	ubiquitin specific peptidase 22
23341	DNAJC16	DnaJ (Hsp40) homolog, subfamily C, member 16
23353	SUN1	Sad1 and UNC84 domain containing 1
23376	UFL1	UFM1-specific ligase 1
23389	MED13L	mediator complex subunit 13-like
23508	TTC9	tetratricopeptide repeat domain 9
23585	TMEM50A	transmembrane protein 50A
23590	PDSS1	prenyl (decaprenyl) diphosphate synthase, subunit 1
23592	LEMD3	LEM domain containing 3
23595	ORC3	origin recognition complex, subunit 3
23600	AMACR	alpha-methylacyl-CoA racemase
23620	NTSR2	neurotensin receptor 2
252969	NEIL2	nei endonuclease VIII-like 2 (E. coli)
254050	LRRC43	leucine rich repeat containing 43
254102	EHBP1L1	EH domain binding protein 1-like 1
255426	RASGEF1C	RasGEF domain family, member 1C
255520	ELMOD2	ELMO/CED-12 domain containing 2
255631	COL24A1	collagen, type XXIV, alpha 1
2558	GABRA5	gamma-aminobutyric acid (GABA) A receptor, alpha 5
256309	CCDC110	coiled-coil domain containing 110
2567	GABRG3	gamma-aminobutyric acid (GABA) A receptor, gamma 3
256714	MAP7D2	MAP7 domain containing 2
25771	TBC1D22A	TBC1 domain family, member 22A
25778	DSTYK	dual serine/threonine and tyrosine protein kinase
25793	FBXO7	F-box protein 7
25854	FAM149A	family with sequence similarity 149, member A
25858	C11orf20	chromosome 11 open reading frame 20
259282	BOD1L	biorientation of chromosomes in cell division 1-like
25937	WWTR1	WW domain containing transcription regulator 1
25962	KIAA1429	KIAA1429
25979	DHRS7B	dehydrogenase/reductase (SDR family) member 7B
25981	DNAH1	dynein, axonemal, heavy chain 1
26045	LRRTM2	leucine rich repeat transmembrane neuronal 2
26059	ERC2	ELKS/RAB6-interacting/CAST family member 2
26074	C20orf26	chromosome 20 open reading frame 26
26173	INTS1	integrator complex subunit 1
26235	FBXL4	F-box and leucine-rich repeat protein 4
26284	ERAL1	Era G-protein-like 1 (E. coli)
[truncated: 435 more rows]

## Sheet: B-Cortex 1-2940
Overlap Results
Collection(s):	TFT
# overlaps shown:	10
# genesets in collections:	615
# genes in comparison (n):	2643
# genes in universe (N):	45956
Gene Set Name	# Genes in Gene Set (K)	Description	# Genes in Overlap (k)	k/K	p-value	FDR q-value
GGGCGGR_SP1_Q6	2940	Genes having at least one occurence of the highly conserved motif M6 GGGCGGR sites. The motif matches transcription factor binding site V$SP1_Q6 (v7.4 TRANSFAC).	561	0.1908	5.09e-152	3.13e-149
CAGGTG_E12_Q6	2485	Genes having at least one occurence of the highly conserved motif M12 CAGGTG sites. The motif matches transcription factor binding site V$E12_Q6 (v7.4 TRANSFAC).	458	0.1843	3e-116	9.23e-114
CTTTGT_LEF1_Q2	1972	Genes having at least one occurence of the highly conserved motif M13 CTTTGT sites. The motif matches transcription factor binding site V$LEF1_Q2 (v7.4 TRANSFAC).	399	0.2023	5.91e-114	1.21e-111
GGGAGGRR_MAZ_Q6	2274	Genes having at least one occurence of the highly conserved motif M24 GGGAGGRR sites. The motif matches transcription factor binding site V$MAZ_Q6 (v7.4 TRANSFAC).	404	0.1777	1.83e-96	2.82e-94
GGGTGGRR_PAX4_03	1294	Genes having at least one occurence of the highly conserved motif M56 GGGTGGRR sites. The motif matches transcription factor binding site V$PAX4_03 (v7.4 TRANSFAC).	287	0.2218	8.07e-91	9.92e-89
TTGTTT_FOXO4_01	2061	Genes having at least one occurence of the highly conserved motif M60 TTGTTT sites. The motif matches transcription factor binding site V$FOXO4_01 (v7.4 TRANSFAC).	349	0.1693	5.86e-77	6.01e-75
TGGAAA_NFAT_Q4_01	1896	Genes having at least one occurence of the highly conserved motif M55 TGGAAA sites. The motif matches transcription factor binding site V$NFAT_Q4_01 (v7.4 TRANSFAC).	329	0.1735	4.17e-75	3.67e-73
AACTTT_UNKNOWN	1890	Genes having at least one occurence of the highly conserved motif M17 AACTTT in the region spanning up to 4 kb around their transcription start sites. The motif does not match any known transcription factor binding site (v7.4 TRANSFAC).	320	0.1693	2.63e-70	2.03e-68
CAGCTG_AP4_Q5	1524	Genes having at least one occurence of the highly conserved motif M15 CAGCTG sites. The motif matches transcription factor binding site V$AP4_Q5 (v7.4 TRANSFAC).	277	0.1818	2.47e-67	1.69e-65
CTGCAGY_UNKNOWN	765	Genes having at least one occurence of the highly conserved motif M101 CTGCAGY in the region spanning up to 4 kb around their transcription start sites. The motif does not match any known transcription factor binding site (v7.4 TRANSFAC).	174	0.2275	1.8e-56	1.1e-54
Gene/Gene Set Overlap Matrix
Entrez Gene Id	Gene Symbol	Gene Description	GGGCGGR_SP1_Q6	CAGGTG_E12_Q6	CTTTGT_LEF1_Q2	GGGAGGRR_MAZ_Q6	GGGTGGRR_PAX4_03	TTGTTT_FOXO4_01	TGGAAA_NFAT_Q4_01	AACTTT_UNKNOWN	CAGCTG_AP4_Q5	CTGCAGY_UNKNOWN
54910	SEMA4C	sema domain, immunoglobulin domain (Ig), transmembrane domain (TM) and short cytoplasmic domain, (semaphorin) 4C	GGGCGGR_SP1_Q6	CAGGTG_E12_Q6	CTTTGT_LEF1_Q2	GGGAGGRR_MAZ_Q6	GGGTGGRR_PAX4_03	TTGTTT_FOXO4_01	TGGAAA_NFAT_Q4_01	AACTTT_UNKNOWN
11337	GABARAP	GABA(A) receptor-associated protein	GGGCGGR_SP1_Q6	CAGGTG_E12_Q6	CTTTGT_LEF1_Q2	GGGAGGRR_MAZ_Q6	GGGTGGRR_PAX4_03	TTGTTT_FOXO4_01	TGGAAA_NFAT_Q4_01	AACTTT_UNKNOWN
11075	STMN2	stathmin-like 2	GGGCGGR_SP1_Q6	CAGGTG_E12_Q6	CTTTGT_LEF1_Q2	GGGAGGRR_MAZ_Q6	GGGTGGRR_PAX4_03	TTGTTT_FOXO4_01	TGGAAA_NFAT_Q4_01		CAGCTG_AP4_Q5	CTGCAGY_UNKNOWN
7059	THBS3	thrombospondin 3	GGGCGGR_SP1_Q6	CAGGTG_E12_Q6	CTTTGT_LEF1_Q2	GGGAGGRR_MAZ_Q6	GGGTGGRR_PAX4_03	TTGTTT_FOXO4_01	TGGAAA_NFAT_Q4_01
4580	MTX1	metaxin 1	GGGCGGR_SP1_Q6	CAGGTG_E12_Q6	CTTTGT_LEF1_Q2	GGGAGGRR_MAZ_Q6	GGGTGGRR_PAX4_03	TTGTTT_FOXO4_01	TGGAAA_NFAT_Q4_01
5521	PPP2R2B	protein phosphatase 2, regulatory subunit B, beta	GGGCGGR_SP1_Q6	CAGGTG_E12_Q6	CTTTGT_LEF1_Q2	GGGAGGRR_MAZ_Q6	GGGTGGRR_PAX4_03	TTGTTT_FOXO4_01		AACTTT_UNKNOWN		CTGCAGY_UNKNOWN
4302	MLLT6	myeloid/lymphoid or mixed-lineage leukemia (trithorax homolog, Drosophila); translocated to, 6	GGGCGGR_SP1_Q6	CAGGTG_E12_Q6	CTTTGT_LEF1_Q2	GGGAGGRR_MAZ_Q6	GGGTGGRR_PAX4_03	TTGTTT_FOXO4_01
54207	KCNK10	potassium channel, subfamily K, member 10	GGGCGGR_SP1_Q6	CAGGTG_E12_Q6	CTTTGT_LEF1_Q2	GGGAGGRR_MAZ_Q6	GGGTGGRR_PAX4_03	TTGTTT_FOXO4_01
2004	ELK3	ELK3, ETS-domain protein (SRF accessory protein 2)	GGGCGGR_SP1_Q6	CAGGTG_E12_Q6	CTTTGT_LEF1_Q2	GGGAGGRR_MAZ_Q6	GGGTGGRR_PAX4_03		TGGAAA_NFAT_Q4_01	AACTTT_UNKNOWN		CTGCAGY_UNKNOWN
1462	VCAN	versican	GGGCGGR_SP1_Q6	CAGGTG_E12_Q6	CTTTGT_LEF1_Q2	GGGAGGRR_MAZ_Q6	GGGTGGRR_PAX4_03		TGGAAA_NFAT_Q4_01	AACTTT_UNKNOWN
1995	ELAVL3	ELAV (embryonic lethal, abnormal vision, Drosophila)-like 3 (Hu antigen C)	GGGCGGR_SP1_Q6	CAGGTG_E12_Q6	CTTTGT_LEF1_Q2	GGGAGGRR_MAZ_Q6	GGGTGGRR_PAX4_03		TGGAAA_NFAT_Q4_01		CAGCTG_AP4_Q5
10602	CDC42EP3	CDC42 effector protein (Rho GTPase binding) 3	GGGCGGR_SP1_Q6	CAGGTG_E12_Q6	CTTTGT_LEF1_Q2	GGGAGGRR_MAZ_Q6	GGGTGGRR_PAX4_03		TGGAAA_NFAT_Q4_01		CAGCTG_AP4_Q5
5916	RARG	retinoic acid receptor, gamma	GGGCGGR_SP1_Q6	CAGGTG_E12_Q6	CTTTGT_LEF1_Q2	GGGAGGRR_MAZ_Q6	GGGTGGRR_PAX4_03		TGGAAA_NFAT_Q4_01
28951	TRIB2	tribbles homolog 2 (Drosophila)	GGGCGGR_SP1_Q6	CAGGTG_E12_Q6	CTTTGT_LEF1_Q2	GGGAGGRR_MAZ_Q6	GGGTGGRR_PAX4_03		TGGAAA_NFAT_Q4_01
8913	CACNA1G	calcium channel, voltage-dependent, T type, alpha 1G subunit	GGGCGGR_SP1_Q6	CAGGTG_E12_Q6	CTTTGT_LEF1_Q2	GGGAGGRR_MAZ_Q6	GGGTGGRR_PAX4_03			AACTTT_UNKNOWN	CAGCTG_AP4_Q5
124930	ANKRD13B	ankyrin repeat domain 13B	GGGCGGR_SP1_Q6	CAGGTG_E12_Q6	CTTTGT_LEF1_Q2	GGGAGGRR_MAZ_Q6	GGGTGGRR_PAX4_03			AACTTT_UNKNOWN
57060	PCBP4	poly(rC) binding protein 4	GGGCGGR_SP1_Q6	CAGGTG_E12_Q6	CTTTGT_LEF1_Q2	GGGAGGRR_MAZ_Q6	GGGTGGRR_PAX4_03				CAGCTG_AP4_Q5
7534	YWHAZ	tyrosine 3-monooxygenase/tryptophan 5-monooxygenase activation protein, zeta polypeptide	GGGCGGR_SP1_Q6	CAGGTG_E12_Q6	CTTTGT_LEF1_Q2	GGGAGGRR_MAZ_Q6	GGGTGGRR_PAX4_03				CAGCTG_AP4_Q5
9253	NUMBL	numb homolog (Drosophila)-like	GGGCGGR_SP1_Q6	CAGGTG_E12_Q6	CTTTGT_LEF1_Q2	GGGAGGRR_MAZ_Q6	GGGTGGRR_PAX4_03				CAGCTG_AP4_Q5
59274	MESDC1	mesoderm development candidate 1	GGGCGGR_SP1_Q6	CAGGTG_E12_Q6	CTTTGT_LEF1_Q2	GGGAGGRR_MAZ_Q6	GGGTGGRR_PAX4_03				CAGCTG_AP4_Q5
4137	MAPT	microtubule-associated protein tau	GGGCGGR_SP1_Q6	CAGGTG_E12_Q6	CTTTGT_LEF1_Q2	GGGAGGRR_MAZ_Q6	GGGTGGRR_PAX4_03					CTGCAGY_UNKNOWN
222950	C7orf51	chromosome 7 open reading frame 51	GGGCGGR_SP1_Q6	CAGGTG_E12_Q6	CTTTGT_LEF1_Q2	GGGAGGRR_MAZ_Q6	GGGTGGRR_PAX4_03
10313	RTN3	reticulon 3	GGGCGGR_SP1_Q6	CAGGTG_E12_Q6	CTTTGT_LEF1_Q2	GGGAGGRR_MAZ_Q6	GGGTGGRR_PAX4_03
2115	ETV1	ets variant 1	GGGCGGR_SP1_Q6	CAGGTG_E12_Q6	CTTTGT_LEF1_Q2	GGGAGGRR_MAZ_Q6		TTGTTT_FOXO4_01	TGGAAA_NFAT_Q4_01	AACTTT_UNKNOWN	CAGCTG_AP4_Q5	CTGCAGY_UNKNOWN
55512	SMPD3	sphingomyelin phosphodiesterase 3, neutral membrane (neutral sphingomyelinase II)	GGGCGGR_SP1_Q6	CAGGTG_E12_Q6	CTTTGT_LEF1_Q2	GGGAGGRR_MAZ_Q6		TTGTTT_FOXO4_01	TGGAAA_NFAT_Q4_01
5937	RBMS1	RNA binding motif, single stranded interacting protein 1	GGGCGGR_SP1_Q6	CAGGTG_E12_Q6	CTTTGT_LEF1_Q2	GGGAGGRR_MAZ_Q6		TTGTTT_FOXO4_01		AACTTT_UNKNOWN
2735	GLI1	GLI family zinc finger 1	GGGCGGR_SP1_Q6	CAGGTG_E12_Q6	CTTTGT_LEF1_Q2	GGGAGGRR_MAZ_Q6		TTGTTT_FOXO4_01				CTGCAGY_UNKNOWN
1400	CRMP1	collapsin response mediator protein 1	GGGCGGR_SP1_Q6	CAGGTG_E12_Q6	CTTTGT_LEF1_Q2	GGGAGGRR_MAZ_Q6		TTGTTT_FOXO4_01
677	ZFP36L1	zinc finger protein 36, C3H type-like 1	GGGCGGR_SP1_Q6	CAGGTG_E12_Q6	CTTTGT_LEF1_Q2	GGGAGGRR_MAZ_Q6			TGGAAA_NFAT_Q4_01	AACTTT_UNKNOWN	CAGCTG_AP4_Q5	CTGCAGY_UNKNOWN
6494	SIPA1	signal-induced proliferation-associated 1	GGGCGGR_SP1_Q6	CAGGTG_E12_Q6	CTTTGT_LEF1_Q2	GGGAGGRR_MAZ_Q6			TGGAAA_NFAT_Q4_01			CTGCAGY_UNKNOWN
9520	NPEPPS	aminopeptidase puromycin sensitive	GGGCGGR_SP1_Q6	CAGGTG_E12_Q6	CTTTGT_LEF1_Q2	GGGAGGRR_MAZ_Q6			TGGAAA_NFAT_Q4_01
1303	COL12A1	collagen, type XII, alpha 1	GGGCGGR_SP1_Q6	CAGGTG_E12_Q6	CTTTGT_LEF1_Q2	GGGAGGRR_MAZ_Q6			TGGAAA_NFAT_Q4_01
9590	AKAP12	A kinase (PRKA) anchor protein 12	GGGCGGR_SP1_Q6	CAGGTG_E12_Q6	CTTTGT_LEF1_Q2	GGGAGGRR_MAZ_Q6
10625	IVNS1ABP	influenza virus NS1A binding protein	GGGCGGR_SP1_Q6	CAGGTG_E12_Q6	CTTTGT_LEF1_Q2	GGGAGGRR_MAZ_Q6
57659	ZBTB4	zinc finger and BTB domain containing 4	GGGCGGR_SP1_Q6	CAGGTG_E12_Q6	CTTTGT_LEF1_Q2	GGGAGGRR_MAZ_Q6
57369	GJD2	gap junction protein, delta 2, 36kDa	GGGCGGR_SP1_Q6	CAGGTG_E12_Q6	CTTTGT_LEF1_Q2	GGGAGGRR_MAZ_Q6
57556	SEMA6A	sema domain, transmembrane domain (TM), and cytoplasmic domain, (semaphorin) 6A	GGGCGGR_SP1_Q6	CAGGTG_E12_Q6	CTTTGT_LEF1_Q2		GGGTGGRR_PAX4_03	TTGTTT_FOXO4_01	TGGAAA_NFAT_Q4_01	AACTTT_UNKNOWN		CTGCAGY_UNKNOWN
10500	SEMA6C	sema domain, transmembrane domain (TM), and cytoplasmic domain, (semaphorin) 6C	GGGCGGR_SP1_Q6	CAGGTG_E12_Q6	CTTTGT_LEF1_Q2		GGGTGGRR_PAX4_03	TTGTTT_FOXO4_01
8301	PICALM	phosphatidylinositol binding clathrin assembly protein	GGGCGGR_SP1_Q6	CAGGTG_E12_Q6	CTTTGT_LEF1_Q2		GGGTGGRR_PAX4_03		TGGAAA_NFAT_Q4_01	AACTTT_UNKNOWN	CAGCTG_AP4_Q5	CTGCAGY_UNKNOWN
51621	KLF13	Kruppel-like factor 13	GGGCGGR_SP1_Q6	CAGGTG_E12_Q6	CTTTGT_LEF1_Q2		GGGTGGRR_PAX4_03		TGGAAA_NFAT_Q4_01		CAGCTG_AP4_Q5
81551	STMN4	stathmin-like 4	GGGCGGR_SP1_Q6	CAGGTG_E12_Q6	CTTTGT_LEF1_Q2		GGGTGGRR_PAX4_03			AACTTT_UNKNOWN
139285	FAM123B	family with sequence similarity 123B	GGGCGGR_SP1_Q6	CAGGTG_E12_Q6	CTTTGT_LEF1_Q2		GGGTGGRR_PAX4_03				CAGCTG_AP4_Q5
57142	RTN4	reticulon 4	GGGCGGR_SP1_Q6	CAGGTG_E12_Q6	CTTTGT_LEF1_Q2		GGGTGGRR_PAX4_03					CTGCAGY_UNKNOWN
23647	ARFIP2	ADP-ribosylation factor interacting protein 2	GGGCGGR_SP1_Q6	CAGGTG_E12_Q6	CTTTGT_LEF1_Q2		GGGTGGRR_PAX4_03
604	BCL6	B-cell CLL/lymphoma 6	GGGCGGR_SP1_Q6	CAGGTG_E12_Q6	CTTTGT_LEF1_Q2			TTGTTT_FOXO4_01	TGGAAA_NFAT_Q4_01	AACTTT_UNKNOWN	CAGCTG_AP4_Q5
4208	MEF2C	myocyte enhancer factor 2C	GGGCGGR_SP1_Q6	CAGGTG_E12_Q6	CTTTGT_LEF1_Q2			TTGTTT_FOXO4_01	TGGAAA_NFAT_Q4_01	AACTTT_UNKNOWN	CAGCTG_AP4_Q5
4088	SMAD3	SMAD family member 3	GGGCGGR_SP1_Q6	CAGGTG_E12_Q6	CTTTGT_LEF1_Q2			TTGTTT_FOXO4_01	TGGAAA_NFAT_Q4_01	AACTTT_UNKNOWN
84251	SGIP1	SH3-domain GRB2-like (endophilin) interacting protein 1	GGGCGGR_SP1_Q6	CAGGTG_E12_Q6	CTTTGT_LEF1_Q2			TTGTTT_FOXO4_01	TGGAAA_NFAT_Q4_01		CAGCTG_AP4_Q5	CTGCAGY_UNKNOWN
3096	HIVEP1	human immunodeficiency virus type I enhancer binding protein 1	GGGCGGR_SP1_Q6	CAGGTG_E12_Q6	CTTTGT_LEF1_Q2			TTGTTT_FOXO4_01	TGGAAA_NFAT_Q4_01
389792	IER5L	immediate early response 5-like	GGGCGGR_SP1_Q6	CAGGTG_E12_Q6	CTTTGT_LEF1_Q2			TTGTTT_FOXO4_01		AACTTT_UNKNOWN	CAGCTG_AP4_Q5	CTGCAGY_UNKNOWN
9223	MAGI1	membrane associated guanylate kinase, WW and PDZ domain containing 1	GGGCGGR_SP1_Q6	CAGGTG_E12_Q6	CTTTGT_LEF1_Q2			TTGTTT_FOXO4_01		AACTTT_UNKNOWN	CAGCTG_AP4_Q5
6252	RTN1	reticulon 1	GGGCGGR_SP1_Q6	CAGGTG_E12_Q6	CTTTGT_LEF1_Q2			TTGTTT_FOXO4_01
4904	YBX1	Y box binding protein 1	GGGCGGR_SP1_Q6	CAGGTG_E12_Q6	CTTTGT_LEF1_Q2			TTGTTT_FOXO4_01
28969	BZW2	basic leucine zipper and W2 domains 2	GGGCGGR_SP1_Q6	CAGGTG_E12_Q6	CTTTGT_LEF1_Q2				TGGAAA_NFAT_Q4_01
7008	TEF	thyrotrophic embryonic factor	GGGCGGR_SP1_Q6	CAGGTG_E12_Q6	CTTTGT_LEF1_Q2					AACTTT_UNKNOWN	CAGCTG_AP4_Q5
51155	HN1	hematological and neurological expressed 1	GGGCGGR_SP1_Q6	CAGGTG_E12_Q6	CTTTGT_LEF1_Q2					AACTTT_UNKNOWN	CAGCTG_AP4_Q5
4628	MYH10	myosin, heavy chain 10, non-muscle	GGGCGGR_SP1_Q6	CAGGTG_E12_Q6	CTTTGT_LEF1_Q2					AACTTT_UNKNOWN
805	CALM2	calmodulin 2 (phosphorylase kinase, delta)	GGGCGGR_SP1_Q6	CAGGTG_E12_Q6	CTTTGT_LEF1_Q2						CAGCTG_AP4_Q5
140465	MYL6B	myosin, light chain 6B, alkali, smooth muscle and non-muscle	GGGCGGR_SP1_Q6	CAGGTG_E12_Q6	CTTTGT_LEF1_Q2						CAGCTG_AP4_Q5
3157	HMGCS1	3-hydroxy-3-methylglutaryl-CoA synthase 1 (soluble)	GGGCGGR_SP1_Q6	CAGGTG_E12_Q6	CTTTGT_LEF1_Q2
56890	MDM1	Mdm1 nuclear protein homolog (mouse)	GGGCGGR_SP1_Q6	CAGGTG_E12_Q6	CTTTGT_LEF1_Q2
5155	PDGFB	platelet-derived growth factor beta polypeptide	GGGCGGR_SP1_Q6	CAGGTG_E12_Q6		GGGAGGRR_MAZ_Q6	GGGTGGRR_PAX4_03	TTGTTT_FOXO4_01	TGGAAA_NFAT_Q4_01	AACTTT_UNKNOWN	CAGCTG_AP4_Q5	CTGCAGY_UNKNOWN
139411	PTCHD1	patched domain containing 1	GGGCGGR_SP1_Q6	CAGGTG_E12_Q6		GGGAGGRR_MAZ_Q6	GGGTGGRR_PAX4_03	TTGTTT_FOXO4_01	TGGAAA_NFAT_Q4_01	AACTTT_UNKNOWN	CAGCTG_AP4_Q5	CTGCAGY_UNKNOWN
81603	TRIM8	tripartite motif containing 8	GGGCGGR_SP1_Q6	CAGGTG_E12_Q6		GGGAGGRR_MAZ_Q6	GGGTGGRR_PAX4_03	TTGTTT_FOXO4_01	TGGAAA_NFAT_Q4_01	AACTTT_UNKNOWN	CAGCTG_AP4_Q5
3728	JUP	junction plakoglobin	GGGCGGR_SP1_Q6	CAGGTG_E12_Q6		GGGAGGRR_MAZ_Q6	GGGTGGRR_PAX4_03	TTGTTT_FOXO4_01		AACTTT_UNKNOWN
145581	LRFN5	leucine rich repeat and fibronectin type III domain containing 5	GGGCGGR_SP1_Q6	CAGGTG_E12_Q6		GGGAGGRR_MAZ_Q6	GGGTGGRR_PAX4_03	TTGTTT_FOXO4_01			CAGCTG_AP4_Q5	CTGCAGY_UNKNOWN
11151	CORO1A	coronin, actin binding protein, 1A	GGGCGGR_SP1_Q6	CAGGTG_E12_Q6		GGGAGGRR_MAZ_Q6	GGGTGGRR_PAX4_03	TTGTTT_FOXO4_01
23002	DAAM1	dishevelled associated activator of morphogenesis 1	GGGCGGR_SP1_Q6	CAGGTG_E12_Q6		GGGAGGRR_MAZ_Q6	GGGTGGRR_PAX4_03		TGGAAA_NFAT_Q4_01	AACTTT_UNKNOWN	CAGCTG_AP4_Q5
9854	C2CD2L	C2CD2-like	GGGCGGR_SP1_Q6	CAGGTG_E12_Q6		GGGAGGRR_MAZ_Q6	GGGTGGRR_PAX4_03		TGGAAA_NFAT_Q4_01
81846	SBF2	SET binding factor 2	GGGCGGR_SP1_Q6	CAGGTG_E12_Q6		GGGAGGRR_MAZ_Q6	GGGTGGRR_PAX4_03		TGGAAA_NFAT_Q4_01
56934	CA10	carbonic anhydrase X	GGGCGGR_SP1_Q6	CAGGTG_E12_Q6		GGGAGGRR_MAZ_Q6	GGGTGGRR_PAX4_03			AACTTT_UNKNOWN
10044	SH2D3C	SH2 domain containing 3C	GGGCGGR_SP1_Q6	CAGGTG_E12_Q6		GGGAGGRR_MAZ_Q6	GGGTGGRR_PAX4_03					CTGCAGY_UNKNOWN
10235	RASGRP2	RAS guanyl releasing protein 2 (calcium and DAG-regulated)	GGGCGGR_SP1_Q6	CAGGTG_E12_Q6		GGGAGGRR_MAZ_Q6	GGGTGGRR_PAX4_03
23564	DDAH2	dimethylarginine dimethylaminohydrolase 2	GGGCGGR_SP1_Q6	CAGGTG_E12_Q6		GGGAGGRR_MAZ_Q6	GGGTGGRR_PAX4_03
64221	ROBO3	roundabout, axon guidance receptor, homolog 3 (Drosophila)	GGGCGGR_SP1_Q6	CAGGTG_E12_Q6		GGGAGGRR_MAZ_Q6	GGGTGGRR_PAX4_03
90933	TRIM41	tripartite motif containing 41	GGGCGGR_SP1_Q6	CAGGTG_E12_Q6		GGGAGGRR_MAZ_Q6	GGGTGGRR_PAX4_03
182	JAG1	jagged 1	GGGCGGR_SP1_Q6	CAGGTG_E12_Q6		GGGAGGRR_MAZ_Q6		TTGTTT_FOXO4_01	TGGAAA_NFAT_Q4_01	AACTTT_UNKNOWN	CAGCTG_AP4_Q5
140688	C20orf112	chromosome 20 open reading frame 112	GGGCGGR_SP1_Q6	CAGGTG_E12_Q6		GGGAGGRR_MAZ_Q6		TTGTTT_FOXO4_01	TGGAAA_NFAT_Q4_01	AACTTT_UNKNOWN	CAGCTG_AP4_Q5
9368	SLC9A3R1	solute carrier family 9 (sodium/hydrogen exchanger), member 3 regulator 1	GGGCGGR_SP1_Q6	CAGGTG_E12_Q6		GGGAGGRR_MAZ_Q6		TTGTTT_FOXO4_01	TGGAAA_NFAT_Q4_01
5187	PER1	period homolog 1 (Drosophila)	GGGCGGR_SP1_Q6	CAGGTG_E12_Q6		GGGAGGRR_MAZ_Q6		TTGTTT_FOXO4_01
4684	NCAM1	neural cell adhesion molecule 1	GGGCGGR_SP1_Q6	CAGGTG_E12_Q6		GGGAGGRR_MAZ_Q6		TTGTTT_FOXO4_01
9132	KCNQ4	potassium voltage-gated channel, KQT-like subfamily, member 4	GGGCGGR_SP1_Q6	CAGGTG_E12_Q6		GGGAGGRR_MAZ_Q6			TGGAAA_NFAT_Q4_01	AACTTT_UNKNOWN	CAGCTG_AP4_Q5
8492	PRSS12	protease, serine, 12 (neurotrypsin, motopsin)	GGGCGGR_SP1_Q6	CAGGTG_E12_Q6		GGGAGGRR_MAZ_Q6			TGGAAA_NFAT_Q4_01	AACTTT_UNKNOWN
1871	E2F3	E2F transcription factor 3	GGGCGGR_SP1_Q6	CAGGTG_E12_Q6		GGGAGGRR_MAZ_Q6			TGGAAA_NFAT_Q4_01		CAGCTG_AP4_Q5
80179	MYO19	myosin XIX	GGGCGGR_SP1_Q6	CAGGTG_E12_Q6		GGGAGGRR_MAZ_Q6			TGGAAA_NFAT_Q4_01
6659	SOX4	SRY (sex determining region Y)-box 4	GGGCGGR_SP1_Q6	CAGGTG_E12_Q6		GGGAGGRR_MAZ_Q6				AACTTT_UNKNOWN	CAGCTG_AP4_Q5	CTGCAGY_UNKNOWN
51566	ARMCX3	armadillo repeat containing, X-linked 3	GGGCGGR_SP1_Q6	CAGGTG_E12_Q6		GGGAGGRR_MAZ_Q6				AACTTT_UNKNOWN
6666	SOX12	SRY (sex determining region Y)-box 12	GGGCGGR_SP1_Q6	CAGGTG_E12_Q6		GGGAGGRR_MAZ_Q6					CAGCTG_AP4_Q5
7022	TFAP2C	transcription factor AP-2 gamma (activating enhancer binding protein 2 gamma)	GGGCGGR_SP1_Q6	CAGGTG_E12_Q6		GGGAGGRR_MAZ_Q6					CAGCTG_AP4_Q5
266743	NPAS4	neuronal PAS domain protein 4	GGGCGGR_SP1_Q6	CAGGTG_E12_Q6		GGGAGGRR_MAZ_Q6						CTGCAGY_UNKNOWN
9322	TRIP10	thyroid hormone receptor interactor 10	GGGCGGR_SP1_Q6	CAGGTG_E12_Q6		GGGAGGRR_MAZ_Q6
4744	NEFH	neurofilament, heavy polypeptide	GGGCGGR_SP1_Q6	CAGGTG_E12_Q6		GGGAGGRR_MAZ_Q6
283375	SLC39A5	solute carrier family 39 (metal ion transporter), member 5	GGGCGGR_SP1_Q6	CAGGTG_E12_Q6		GGGAGGRR_MAZ_Q6
79085	SLC25A23	solute carrier family 25 (mitochondrial carrier; phosphate carrier), member 23	GGGCGGR_SP1_Q6	CAGGTG_E12_Q6		GGGAGGRR_MAZ_Q6
3164	NR4A1	nuclear receptor subfamily 4, group A, member 1	GGGCGGR_SP1_Q6	CAGGTG_E12_Q6			GGGTGGRR_PAX4_03	TTGTTT_FOXO4_01	TGGAAA_NFAT_Q4_01		CAGCTG_AP4_Q5
11040	PIM2	pim-2 oncogene	GGGCGGR_SP1_Q6	CAGGTG_E12_Q6			GGGTGGRR_PAX4_03	TTGTTT_FOXO4_01	TGGAAA_NFAT_Q4_01
116372	LYPD1	LY6/PLAUR domain containing 1	GGGCGGR_SP1_Q6	CAGGTG_E12_Q6			GGGTGGRR_PAX4_03	TTGTTT_FOXO4_01				CTGCAGY_UNKNOWN
9788	MTSS1	metastasis suppressor 1	GGGCGGR_SP1_Q6	CAGGTG_E12_Q6			GGGTGGRR_PAX4_03		TGGAAA_NFAT_Q4_01	AACTTT_UNKNOWN	CAGCTG_AP4_Q5
6197	RPS6KA3	ribosomal protein S6 kinase, 90kDa, polypeptide 3	GGGCGGR_SP1_Q6	CAGGTG_E12_Q6			GGGTGGRR_PAX4_03		TGGAAA_NFAT_Q4_01	AACTTT_UNKNOWN		CTGCAGY_UNKNOWN
162979	ZNF296	zinc finger protein 296	GGGCGGR_SP1_Q6	CAGGTG_E12_Q6			GGGTGGRR_PAX4_03		TGGAAA_NFAT_Q4_01
4130	MAP1A	microtubule-associated protein 1A	GGGCGGR_SP1_Q6	CAGGTG_E12_Q6			GGGTGGRR_PAX4_03				CAGCTG_AP4_Q5	CTGCAGY_UNKNOWN
5252	PHF1	PHD finger protein 1	GGGCGGR_SP1_Q6	CAGGTG_E12_Q6			GGGTGGRR_PAX4_03				CAGCTG_AP4_Q5
2783	GNB2	guanine nucleotide binding protein (G protein), beta polypeptide 2	GGGCGGR_SP1_Q6	CAGGTG_E12_Q6			GGGTGGRR_PAX4_03				CAGCTG_AP4_Q5
3655	ITGA6	integrin, alpha 6	GGGCGGR_SP1_Q6	CAGGTG_E12_Q6			GGGTGGRR_PAX4_03				CAGCTG_AP4_Q5
90952	ESAM	endothelial cell adhesion molecule	GGGCGGR_SP1_Q6	CAGGTG_E12_Q6			GGGTGGRR_PAX4_03
8826	IQGAP1	IQ motif containing GTPase activating protein 1	GGGCGGR_SP1_Q6	CAGGTG_E12_Q6			GGGTGGRR_PAX4_03
57198	ATP8B2	ATPase, class I, type 8B, member 2	GGGCGGR_SP1_Q6	CAGGTG_E12_Q6			GGGTGGRR_PAX4_03
23092	ARHGAP26	Rho GTPase activating protein 26	GGGCGGR_SP1_Q6	CAGGTG_E12_Q6			GGGTGGRR_PAX4_03
81688	C6orf62	chromosome 6 open reading frame 62	GGGCGGR_SP1_Q6	CAGGTG_E12_Q6				TTGTTT_FOXO4_01	TGGAAA_NFAT_Q4_01	AACTTT_UNKNOWN	CAGCTG_AP4_Q5
23603	CORO1C	coronin, actin binding protein, 1C	GGGCGGR_SP1_Q6	CAGGTG_E12_Q6				TTGTTT_FOXO4_01	TGGAAA_NFAT_Q4_01
1031	CDKN2C	cyclin-dependent kinase inhibitor 2C (p18, inhibits CDK4)	GGGCGGR_SP1_Q6	CAGGTG_E12_Q6				TTGTTT_FOXO4_01			CAGCTG_AP4_Q5
51060	TXNDC12	thioredoxin domain containing 12 (endoplasmic reticulum)	GGGCGGR_SP1_Q6	CAGGTG_E12_Q6				TTGTTT_FOXO4_01			CAGCTG_AP4_Q5
1017	CDK2	cyclin-dependent kinase 2	GGGCGGR_SP1_Q6	CAGGTG_E12_Q6				TTGTTT_FOXO4_01			CAGCTG_AP4_Q5
5050	PAFAH1B3	platelet-activating factor acetylhydrolase 1b, catalytic subunit 3 (29kDa)	GGGCGGR_SP1_Q6	CAGGTG_E12_Q6				TTGTTT_FOXO4_01
22885	ABLIM3	actin binding LIM protein family, member 3	GGGCGGR_SP1_Q6	CAGGTG_E12_Q6				TTGTTT_FOXO4_01
9148	NEURL	neuralized homolog (Drosophila)	GGGCGGR_SP1_Q6	CAGGTG_E12_Q6					TGGAAA_NFAT_Q4_01		CAGCTG_AP4_Q5
4900	NRGN	neurogranin (protein kinase C substrate, RC3)	GGGCGGR_SP1_Q6	CAGGTG_E12_Q6					TGGAAA_NFAT_Q4_01			CTGCAGY_UNKNOWN
92558	CCDC64	coiled-coil domain containing 64	GGGCGGR_SP1_Q6	CAGGTG_E12_Q6					TGGAAA_NFAT_Q4_01
5871	MAP4K2	mitogen-activated protein kinase kinase kinase kinase 2	GGGCGGR_SP1_Q6	CAGGTG_E12_Q6					TGGAAA_NFAT_Q4_01
47	ACLY	ATP citrate lyase	GGGCGGR_SP1_Q6	CAGGTG_E12_Q6					TGGAAA_NFAT_Q4_01
29929	ALG6	asparagine-linked glycosylation 6, alpha-1,3-glucosyltransferase homolog (S. cerevisiae)	GGGCGGR_SP1_Q6	CAGGTG_E12_Q6					TGGAAA_NFAT_Q4_01
2027	ENO3	enolase 3 (beta, muscle)	GGGCGGR_SP1_Q6	CAGGTG_E12_Q6						AACTTT_UNKNOWN	CAGCTG_AP4_Q5
114	ADCY8	adenylate cyclase 8 (brain)	GGGCGGR_SP1_Q6	CAGGTG_E12_Q6						AACTTT_UNKNOWN	CAGCTG_AP4_Q5
3788	KCNS2	potassium voltage-gated channel, delayed-rectifier, subfamily S, member 2	GGGCGGR_SP1_Q6	CAGGTG_E12_Q6						AACTTT_UNKNOWN	CAGCTG_AP4_Q5
2710	GK	glycerol kinase	GGGCGGR_SP1_Q6	CAGGTG_E12_Q6						AACTTT_UNKNOWN
56937	PMEPA1	prostate transmembrane protein, androgen induced 1	GGGCGGR_SP1_Q6	CAGGTG_E12_Q6						AACTTT_UNKNOWN
2560	GABRB1	gamma-aminobutyric acid (GABA) A receptor, beta 1	GGGCGGR_SP1_Q6	CAGGTG_E12_Q6						AACTTT_UNKNOWN
2861	GPR37	G protein-coupled receptor 37 (endothelin receptor type B-like)	GGGCGGR_SP1_Q6	CAGGTG_E12_Q6						AACTTT_UNKNOWN
8862	APLN	apelin	GGGCGGR_SP1_Q6	CAGGTG_E12_Q6							CAGCTG_AP4_Q5	CTGCAGY_UNKNOWN
26580	BSCL2	Berardinelli-Seip congenital lipodystrophy 2 (seipin)	GGGCGGR_SP1_Q6	CAGGTG_E12_Q6							CAGCTG_AP4_Q5	CTGCAGY_UNKNOWN
2785	GNG3	guanine nucleotide binding protein (G protein), gamma 3	GGGCGGR_SP1_Q6	CAGGTG_E12_Q6							CAGCTG_AP4_Q5	CTGCAGY_UNKNOWN
2819	GPD1	glycerol-3-phosphate dehydrogenase 1 (soluble)	GGGCGGR_SP1_Q6	CAGGTG_E12_Q6							CAGCTG_AP4_Q5
10497	UNC13B	unc-13 homolog B (C. elegans)	GGGCGGR_SP1_Q6	CAGGTG_E12_Q6							CAGCTG_AP4_Q5
9110	MTMR4	myotubularin related protein 4	GGGCGGR_SP1_Q6	CAGGTG_E12_Q6							CAGCTG_AP4_Q5
51024	FIS1	fission 1 (mitochondrial outer membrane) homolog (S. cerevisiae)	GGGCGGR_SP1_Q6	CAGGTG_E12_Q6							CAGCTG_AP4_Q5
928	CD9	CD9 molecule	GGGCGGR_SP1_Q6	CAGGTG_E12_Q6							CAGCTG_AP4_Q5
64403	CDH24	cadherin 24, type 2	GGGCGGR_SP1_Q6	CAGGTG_E12_Q6								CTGCAGY_UNKNOWN
821	CANX	calnexin	GGGCGGR_SP1_Q6	CAGGTG_E12_Q6
8407	TAGLN2	transgelin 2	GGGCGGR_SP1_Q6	CAGGTG_E12_Q6
162	AP1B1	adaptor-related protein complex 1, beta 1 subunit	GGGCGGR_SP1_Q6	CAGGTG_E12_Q6
27336	HTATSF1	HIV-1 Tat specific factor 1	GGGCGGR_SP1_Q6	CAGGTG_E12_Q6
2316	FLNA	filamin A, alpha	GGGCGGR_SP1_Q6	CAGGTG_E12_Q6
153364	MBLAC2	metallo-beta-lactamase domain containing 2	GGGCGGR_SP1_Q6	CAGGTG_E12_Q6
11022	TDRKH	tudor and KH domain containing	GGGCGGR_SP1_Q6	CAGGTG_E12_Q6
84759	PCGF1	polycomb group ring finger 1	GGGCGGR_SP1_Q6	CAGGTG_E12_Q6
3993	LLGL2	lethal giant larvae homolog 2 (Drosophila)	GGGCGGR_SP1_Q6	CAGGTG_E12_Q6
64834	ELOVL1	ELOVL fatty acid elongase 1	GGGCGGR_SP1_Q6	CAGGTG_E12_Q6
171177	RHOV	ras homolog gene family, member V	GGGCGGR_SP1_Q6	CAGGTG_E12_Q6
23344	ESYT1	extended synaptotagmin-like protein 1	GGGCGGR_SP1_Q6	CAGGTG_E12_Q6
9517	SPTLC2	serine palmitoyltransferase, long chain base subunit 2	GGGCGGR_SP1_Q6	CAGGTG_E12_Q6
26575	RGS17	regulator of G-protein signaling 17	GGGCGGR_SP1_Q6	CAGGTG_E12_Q6
1299	COL9A3	collagen, type IX, alpha 3	GGGCGGR_SP1_Q6	CAGGTG_E12_Q6
10733	PLK4	polo-like kinase 4	GGGCGGR_SP1_Q6	CAGGTG_E12_Q6
11021	RAB35	RAB35, member RAS oncogene family	GGGCGGR_SP1_Q6	CAGGTG_E12_Q6
23310	NCAPD3	non-SMC condensin II complex, subunit D3	GGGCGGR_SP1_Q6	CAGGTG_E12_Q6
5062	PAK2	p21 protein (Cdc42/Rac)-activated kinase 2	GGGCGGR_SP1_Q6	CAGGTG_E12_Q6
146664	MGAT5B	mannosyl (alpha-1,6-)-glycoprotein beta-1,6-N-acetyl-glucosaminyltransferase, isozyme B	GGGCGGR_SP1_Q6	CAGGTG_E12_Q6
5208	PFKFB2	6-phosphofructo-2-kinase/fructose-2,6-biphosphatase 2	GGGCGGR_SP1_Q6	CAGGTG_E12_Q6
2314	FLII	flightless I homolog (Drosophila)	GGGCGGR_SP1_Q6	CAGGTG_E12_Q6
286827	TRIM59	tripartite motif containing 59	GGGCGGR_SP1_Q6	CAGGTG_E12_Q6
147007	TMEM199	transmembrane protein 199	GGGCGGR_SP1_Q6	CAGGTG_E12_Q6
89894	TMEM116	transmembrane protein 116	GGGCGGR_SP1_Q6	CAGGTG_E12_Q6
168544	ZNF467	zinc finger protein 467	GGGCGGR_SP1_Q6	CAGGTG_E12_Q6
659	BMPR2	bone morphogenetic protein receptor, type II (serine/threonine kinase)	GGGCGGR_SP1_Q6		CTTTGT_LEF1_Q2	GGGAGGRR_MAZ_Q6	GGGTGGRR_PAX4_03	TTGTTT_FOXO4_01	TGGAAA_NFAT_Q4_01	AACTTT_UNKNOWN	CAGCTG_AP4_Q5
9572	NR1D1	nuclear receptor subfamily 1, group D, member 1	GGGCGGR_SP1_Q6		CTTTGT_LEF1_Q2	GGGAGGRR_MAZ_Q6	GGGTGGRR_PAX4_03	TTGTTT_FOXO4_01	TGGAAA_NFAT_Q4_01	AACTTT_UNKNOWN		CTGCAGY_UNKNOWN
7157	TP53	tumor protein p53	GGGCGGR_SP1_Q6		CTTTGT_LEF1_Q2	GGGAGGRR_MAZ_Q6	GGGTGGRR_PAX4_03	TTGTTT_FOXO4_01	TGGAAA_NFAT_Q4_01	AACTTT_UNKNOWN
9618	TRAF4	TNF receptor-associated factor 4	GGGCGGR_SP1_Q6		CTTTGT_LEF1_Q2	GGGAGGRR_MAZ_Q6	GGGTGGRR_PAX4_03	TTGTTT_FOXO4_01		AACTTT_UNKNOWN	CAGCTG_AP4_Q5
91851	CHRDL1	chordin-like 1	GGGCGGR_SP1_Q6		CTTTGT_LEF1_Q2	GGGAGGRR_MAZ_Q6	GGGTGGRR_PAX4_03	TTGTTT_FOXO4_01		AACTTT_UNKNOWN
6483	ST3GAL2	ST3 beta-galactoside alpha-2,3-sialyltransferase 2	GGGCGGR_SP1_Q6		CTTTGT_LEF1_Q2	GGGAGGRR_MAZ_Q6	GGGTGGRR_PAX4_03	TTGTTT_FOXO4_01		AACTTT_UNKNOWN
55904	MLL5	myeloid/lymphoid or mixed-lineage leukemia 5 (trithorax homolog, Drosophila)	GGGCGGR_SP1_Q6		CTTTGT_LEF1_Q2	GGGAGGRR_MAZ_Q6	GGGTGGRR_PAX4_03	TTGTTT_FOXO4_01				CTGCAGY_UNKNOWN
10890	RAB10	RAB10, member RAS oncogene family	GGGCGGR_SP1_Q6		CTTTGT_LEF1_Q2	GGGAGGRR_MAZ_Q6	GGGTGGRR_PAX4_03	TTGTTT_FOXO4_01
7431	VIM	vimentin	GGGCGGR_SP1_Q6		CTTTGT_LEF1_Q2	GGGAGGRR_MAZ_Q6	GGGTGGRR_PAX4_03		TGGAAA_NFAT_Q4_01	AACTTT_UNKNOWN
10971	YWHAQ	tyrosine 3-monooxygenase/tryptophan 5-monooxygenase activation protein, theta polypeptide	GGGCGGR_SP1_Q6		CTTTGT_LEF1_Q2	GGGAGGRR_MAZ_Q6	GGGTGGRR_PAX4_03		TGGAAA_NFAT_Q4_01
11096	ADAMTS5	ADAM metallopeptidase with thrombospondin type 1 motif, 5	GGGCGGR_SP1_Q6		CTTTGT_LEF1_Q2	GGGAGGRR_MAZ_Q6	GGGTGGRR_PAX4_03			AACTTT_UNKNOWN
3927	LASP1	LIM and SH3 protein 1	GGGCGGR_SP1_Q6		CTTTGT_LEF1_Q2	GGGAGGRR_MAZ_Q6	GGGTGGRR_PAX4_03			AACTTT_UNKNOWN
1982	EIF4G2	eukaryotic translation initiation factor 4 gamma, 2	GGGCGGR_SP1_Q6		CTTTGT_LEF1_Q2	GGGAGGRR_MAZ_Q6	GGGTGGRR_PAX4_03				CAGCTG_AP4_Q5	CTGCAGY_UNKNOWN
60468	BACH2	BTB and CNC homology 1, basic leucine zipper transcription factor 2	GGGCGGR_SP1_Q6		CTTTGT_LEF1_Q2	GGGAGGRR_MAZ_Q6	GGGTGGRR_PAX4_03				CAGCTG_AP4_Q5
7532	YWHAG	tyrosine 3-monooxygenase/tryptophan 5-monooxygenase activation protein, gamma polypeptide	GGGCGGR_SP1_Q6		CTTTGT_LEF1_Q2	GGGAGGRR_MAZ_Q6	GGGTGGRR_PAX4_03
1431	CS	citrate synthase	GGGCGGR_SP1_Q6		CTTTGT_LEF1_Q2	GGGAGGRR_MAZ_Q6	GGGTGGRR_PAX4_03
1937	EEF1G	eukaryotic translation elongation factor 1 gamma	GGGCGGR_SP1_Q6		CTTTGT_LEF1_Q2	GGGAGGRR_MAZ_Q6	GGGTGGRR_PAX4_03
80256	KIAA1539	KIAA1539	GGGCGGR_SP1_Q6		CTTTGT_LEF1_Q2	GGGAGGRR_MAZ_Q6	GGGTGGRR_PAX4_03
6660	SOX5	SRY (sex determining region Y)-box 5	GGGCGGR_SP1_Q6		CTTTGT_LEF1_Q2	GGGAGGRR_MAZ_Q6		TTGTTT_FOXO4_01	TGGAAA_NFAT_Q4_01	AACTTT_UNKNOWN	CAGCTG_AP4_Q5
4893	NRAS	neuroblastoma RAS viral (v-ras) oncogene homolog	GGGCGGR_SP1_Q6		CTTTGT_LEF1_Q2	GGGAGGRR_MAZ_Q6		TTGTTT_FOXO4_01	TGGAAA_NFAT_Q4_01	AACTTT_UNKNOWN		CTGCAGY_UNKNOWN
56884	FSTL5	follistatin-like 5	GGGCGGR_SP1_Q6		CTTTGT_LEF1_Q2	GGGAGGRR_MAZ_Q6		TTGTTT_FOXO4_01	TGGAAA_NFAT_Q4_01			CTGCAGY_UNKNOWN
124540	MSI2	musashi homolog 2 (Drosophila)	GGGCGGR_SP1_Q6		CTTTGT_LEF1_Q2	GGGAGGRR_MAZ_Q6		TTGTTT_FOXO4_01		AACTTT_UNKNOWN
168455	C7orf74	chromosome 7 open reading frame 74	GGGCGGR_SP1_Q6		CTTTGT_LEF1_Q2	GGGAGGRR_MAZ_Q6		TTGTTT_FOXO4_01		AACTTT_UNKNOWN
10957	PNRC1	proline-rich nuclear receptor coactivator 1	GGGCGGR_SP1_Q6		CTTTGT_LEF1_Q2	GGGAGGRR_MAZ_Q6		TTGTTT_FOXO4_01				CTGCAGY_UNKNOWN
4082	MARCKS	myristoylated alanine-rich protein kinase C substrate	GGGCGGR_SP1_Q6		CTTTGT_LEF1_Q2	GGGAGGRR_MAZ_Q6		TTGTTT_FOXO4_01
8573	CASK	calcium/calmodulin-dependent serine protein kinase (MAGUK family)	GGGCGGR_SP1_Q6		CTTTGT_LEF1_Q2	GGGAGGRR_MAZ_Q6			TGGAAA_NFAT_Q4_01		CAGCTG_AP4_Q5	CTGCAGY_UNKNOWN
7476	WNT7A	wingless-type MMTV integration site family, member 7A	GGGCGGR_SP1_Q6		CTTTGT_LEF1_Q2	GGGAGGRR_MAZ_Q6				AACTTT_UNKNOWN
1946	EFNA5	ephrin-A5	GGGCGGR_SP1_Q6		CTTTGT_LEF1_Q2	GGGAGGRR_MAZ_Q6				AACTTT_UNKNOWN
2932	GSK3B	glycogen synthase kinase 3 beta	GGGCGGR_SP1_Q6		CTTTGT_LEF1_Q2	GGGAGGRR_MAZ_Q6					CAGCTG_AP4_Q5	CTGCAGY_UNKNOWN
9987	HNRPDL	heterogeneous nuclear ribonucleoprotein D-like	GGGCGGR_SP1_Q6		CTTTGT_LEF1_Q2	GGGAGGRR_MAZ_Q6					CAGCTG_AP4_Q5	CTGCAGY_UNKNOWN
1655	DDX5	DEAD (Asp-Glu-Ala-Asp) box polypeptide 5	GGGCGGR_SP1_Q6		CTTTGT_LEF1_Q2	GGGAGGRR_MAZ_Q6					CAGCTG_AP4_Q5
51070	NOSIP	nitric oxide synthase interacting protein	GGGCGGR_SP1_Q6		CTTTGT_LEF1_Q2	GGGAGGRR_MAZ_Q6					CAGCTG_AP4_Q5
83461	CDCA3	cell division cycle associated 3	GGGCGGR_SP1_Q6		CTTTGT_LEF1_Q2	GGGAGGRR_MAZ_Q6					CAGCTG_AP4_Q5
6253	RTN2	reticulon 2	GGGCGGR_SP1_Q6		CTTTGT_LEF1_Q2	GGGAGGRR_MAZ_Q6					CAGCTG_AP4_Q5
5833	PCYT2	phosphate cytidylyltransferase 2, ethanolamine	GGGCGGR_SP1_Q6		CTTTGT_LEF1_Q2	GGGAGGRR_MAZ_Q6
5547	PRCP	prolylcarboxypeptidase (angiotensinase C)	GGGCGGR_SP1_Q6		CTTTGT_LEF1_Q2	GGGAGGRR_MAZ_Q6
81539	SLC38A1	solute carrier family 38, member 1	GGGCGGR_SP1_Q6		CTTTGT_LEF1_Q2	GGGAGGRR_MAZ_Q6
57048	PLSCR3	phospholipid scramblase 3	GGGCGGR_SP1_Q6		CTTTGT_LEF1_Q2	GGGAGGRR_MAZ_Q6
57805	KIAA1967	KIAA1967	GGGCGGR_SP1_Q6		CTTTGT_LEF1_Q2	GGGAGGRR_MAZ_Q6
84929	FIBCD1	fibrinogen C domain containing 1	GGGCGGR_SP1_Q6		CTTTGT_LEF1_Q2	GGGAGGRR_MAZ_Q6
4131	MAP1B	microtubule-associated protein 1B	GGGCGGR_SP1_Q6		CTTTGT_LEF1_Q2		GGGTGGRR_PAX4_03	TTGTTT_FOXO4_01	TGGAAA_NFAT_Q4_01	AACTTT_UNKNOWN		CTGCAGY_UNKNOWN
8609	KLF7	Kruppel-like factor 7 (ubiquitous)	GGGCGGR_SP1_Q6		CTTTGT_LEF1_Q2		GGGTGGRR_PAX4_03	TTGTTT_FOXO4_01	TGGAAA_NFAT_Q4_01
121268	RHEBL1	Ras homolog enriched in brain like 1	GGGCGGR_SP1_Q6		CTTTGT_LEF1_Q2		GGGTGGRR_PAX4_03	TTGTTT_FOXO4_01	TGGAAA_NFAT_Q4_01
257106	ARHGAP30	Rho GTPase activating protein 30	GGGCGGR_SP1_Q6		CTTTGT_LEF1_Q2		GGGTGGRR_PAX4_03	TTGTTT_FOXO4_01
865	CBFB	core-binding factor, beta subunit	GGGCGGR_SP1_Q6		CTTTGT_LEF1_Q2		GGGTGGRR_PAX4_03	TTGTTT_FOXO4_01
5782	PTPN12	protein tyrosine phosphatase, non-receptor type 12	GGGCGGR_SP1_Q6		CTTTGT_LEF1_Q2		GGGTGGRR_PAX4_03	TTGTTT_FOXO4_01
9643	MORF4L2	mortality factor 4 like 2	GGGCGGR_SP1_Q6		CTTTGT_LEF1_Q2		GGGTGGRR_PAX4_03		TGGAAA_NFAT_Q4_01	AACTTT_UNKNOWN
1808	DPYSL2	dihydropyrimidinase-like 2	GGGCGGR_SP1_Q6		CTTTGT_LEF1_Q2		GGGTGGRR_PAX4_03		TGGAAA_NFAT_Q4_01			CTGCAGY_UNKNOWN
8766	RAB11A	RAB11A, member RAS oncogene family	GGGCGGR_SP1_Q6		CTTTGT_LEF1_Q2		GGGTGGRR_PAX4_03		TGGAAA_NFAT_Q4_01
10163	WASF2	WAS protein family, member 2	GGGCGGR_SP1_Q6		CTTTGT_LEF1_Q2		GGGTGGRR_PAX4_03			AACTTT_UNKNOWN
56882	CDC42SE1	CDC42 small effector 1	GGGCGGR_SP1_Q6		CTTTGT_LEF1_Q2		GGGTGGRR_PAX4_03				CAGCTG_AP4_Q5
399664	MEX3D	mex-3 homolog D (C. elegans)	GGGCGGR_SP1_Q6		CTTTGT_LEF1_Q2		GGGTGGRR_PAX4_03
8193	DPF1	D4, zinc and double PHD fingers family 1	GGGCGGR_SP1_Q6		CTTTGT_LEF1_Q2		GGGTGGRR_PAX4_03
7846	TUBA1A	tubulin, alpha 1a	GGGCGGR_SP1_Q6		CTTTGT_LEF1_Q2			TTGTTT_FOXO4_01	TGGAAA_NFAT_Q4_01		CAGCTG_AP4_Q5	CTGCAGY_UNKNOWN
55917	CTTNBP2NL	CTTNBP2 N-terminal like	GGGCGGR_SP1_Q6		CTTTGT_LEF1_Q2			TTGTTT_FOXO4_01	TGGAAA_NFAT_Q4_01			CTGCAGY_UNKNOWN
3925	STMN1	stathmin 1	GGGCGGR_SP1_Q6		CTTTGT_LEF1_Q2			TTGTTT_FOXO4_01	TGGAAA_NFAT_Q4_01
128077	LIX1L	Lix1 homolog (mouse)-like	GGGCGGR_SP1_Q6		CTTTGT_LEF1_Q2			TTGTTT_FOXO4_01	TGGAAA_NFAT_Q4_01
2742	GLRA2	glycine receptor, alpha 2	GGGCGGR_SP1_Q6		CTTTGT_LEF1_Q2			TTGTTT_FOXO4_01	TGGAAA_NFAT_Q4_01
9467	SH3BP5	SH3-domain binding protein 5 (BTK-associated)	GGGCGGR_SP1_Q6		CTTTGT_LEF1_Q2			TTGTTT_FOXO4_01		AACTTT_UNKNOWN
65010	SLC26A6	solute carrier family 26, member 6	GGGCGGR_SP1_Q6		CTTTGT_LEF1_Q2			TTGTTT_FOXO4_01				CTGCAGY_UNKNOWN
1073	CFL2	cofilin 2 (muscle)	GGGCGGR_SP1_Q6		CTTTGT_LEF1_Q2			TTGTTT_FOXO4_01				CTGCAGY_UNKNOWN
84542	KIAA1841	KIAA1841	GGGCGGR_SP1_Q6		CTTTGT_LEF1_Q2			TTGTTT_FOXO4_01				CTGCAGY_UNKNOWN
8906	AP1G2	adaptor-related protein complex 1, gamma 2 subunit	GGGCGGR_SP1_Q6		CTTTGT_LEF1_Q2			TTGTTT_FOXO4_01
159	ADSS	adenylosuccinate synthase	GGGCGGR_SP1_Q6		CTTTGT_LEF1_Q2			TTGTTT_FOXO4_01
5209	PFKFB3	6-phosphofructo-2-kinase/fructose-2,6-biphosphatase 3	GGGCGGR_SP1_Q6		CTTTGT_LEF1_Q2			TTGTTT_FOXO4_01
11237	RNF24	ring finger protein 24	GGGCGGR_SP1_Q6		CTTTGT_LEF1_Q2			TTGTTT_FOXO4_01
58497	PRUNE	prune homolog (Drosophila)	GGGCGGR_SP1_Q6		CTTTGT_LEF1_Q2			TTGTTT_FOXO4_01
10808	HSPH1	heat shock 105kDa/110kDa protein 1	GGGCGGR_SP1_Q6		CTTTGT_LEF1_Q2				TGGAAA_NFAT_Q4_01	AACTTT_UNKNOWN
55771	PRR11	proline rich 11	GGGCGGR_SP1_Q6		CTTTGT_LEF1_Q2				TGGAAA_NFAT_Q4_01		CAGCTG_AP4_Q5
1181	CLCN2	chloride channel 2	GGGCGGR_SP1_Q6		CTTTGT_LEF1_Q2				TGGAAA_NFAT_Q4_01
5597	MAPK6	mitogen-activated protein kinase 6	GGGCGGR_SP1_Q6		CTTTGT_LEF1_Q2				TGGAAA_NFAT_Q4_01
124936	CYB5D2	cytochrome b5 domain containing 2	GGGCGGR_SP1_Q6		CTTTGT_LEF1_Q2				TGGAAA_NFAT_Q4_01
6566	SLC16A1	solute carrier family 16, member 1 (monocarboxylic acid transporter 1)	GGGCGGR_SP1_Q6		CTTTGT_LEF1_Q2				TGGAAA_NFAT_Q4_01
10577	NPC2	Niemann-Pick disease, type C2	GGGCGGR_SP1_Q6		CTTTGT_LEF1_Q2					AACTTT_UNKNOWN
10962	MLLT11	myeloid/lymphoid or mixed-lineage leukemia (trithorax homolog, Drosophila); translocated to, 11	GGGCGGR_SP1_Q6		CTTTGT_LEF1_Q2						CAGCTG_AP4_Q5
55088	C10orf118	chromosome 10 open reading frame 118	GGGCGGR_SP1_Q6		CTTTGT_LEF1_Q2						CAGCTG_AP4_Q5
65055	REEP1	receptor accessory protein 1	GGGCGGR_SP1_Q6		CTTTGT_LEF1_Q2						CAGCTG_AP4_Q5
81796	SLCO5A1	solute carrier organic anion transporter family, member 5A1	GGGCGGR_SP1_Q6		CTTTGT_LEF1_Q2							CTGCAGY_UNKNOWN
7296	TXNRD1	thioredoxin reductase 1	GGGCGGR_SP1_Q6		CTTTGT_LEF1_Q2
129685	TAF8	TAF8 RNA polymerase II, TATA box binding protein (TBP)-associated factor, 43kDa	GGGCGGR_SP1_Q6		CTTTGT_LEF1_Q2
56929	FEM1C	fem-1 homolog c (C. elegans)	GGGCGGR_SP1_Q6		CTTTGT_LEF1_Q2
7024	TFCP2	transcription factor CP2	GGGCGGR_SP1_Q6		CTTTGT_LEF1_Q2
124222	PAQR4	progestin and adipoQ receptor family member IV	GGGCGGR_SP1_Q6		CTTTGT_LEF1_Q2
3182	HNRNPAB	heterogeneous nuclear ribonucleoprotein A/B	GGGCGGR_SP1_Q6		CTTTGT_LEF1_Q2
2912	GRM2	glutamate receptor, metabotropic 2	GGGCGGR_SP1_Q6		CTTTGT_LEF1_Q2
81577	GFOD2	glucose-fructose oxidoreductase domain containing 2	GGGCGGR_SP1_Q6		CTTTGT_LEF1_Q2
11182	SLC2A6	solute carrier family 2 (facilitated glucose transporter), member 6	GGGCGGR_SP1_Q6		CTTTGT_LEF1_Q2
50861	STMN3	stathmin-like 3	GGGCGGR_SP1_Q6		CTTTGT_LEF1_Q2
51101	FAM164A	family with sequence similarity 164, member A	GGGCGGR_SP1_Q6		CTTTGT_LEF1_Q2
80818	ZNF436	zinc finger protein 436	GGGCGGR_SP1_Q6			GGGAGGRR_MAZ_Q6	GGGTGGRR_PAX4_03	TTGTTT_FOXO4_01	TGGAAA_NFAT_Q4_01	AACTTT_UNKNOWN
26959	HBP1	HMG-box transcription factor 1	GGGCGGR_SP1_Q6			GGGAGGRR_MAZ_Q6	GGGTGGRR_PAX4_03	TTGTTT_FOXO4_01		AACTTT_UNKNOWN
79071	ELOVL6	ELOVL fatty acid elongase 6	GGGCGGR_SP1_Q6			GGGAGGRR_MAZ_Q6	GGGTGGRR_PAX4_03	TTGTTT_FOXO4_01
54985	HCFC1R1	host cell factor C1 regulator 1 (XPO1 dependent)	GGGCGGR_SP1_Q6			GGGAGGRR_MAZ_Q6	GGGTGGRR_PAX4_03		TGGAAA_NFAT_Q4_01	AACTTT_UNKNOWN		CTGCAGY_UNKNOWN
10766	TOB2	transducer of ERBB2, 2	GGGCGGR_SP1_Q6			GGGAGGRR_MAZ_Q6	GGGTGGRR_PAX4_03		TGGAAA_NFAT_Q4_01	AACTTT_UNKNOWN
1026	CDKN1A	cyclin-dependent kinase inhibitor 1A (p21, Cip1)	GGGCGGR_SP1_Q6			GGGAGGRR_MAZ_Q6	GGGTGGRR_PAX4_03		TGGAAA_NFAT_Q4_01
3188	HNRNPH2	heterogeneous nuclear ribonucleoprotein H2 (H')	GGGCGGR_SP1_Q6			GGGAGGRR_MAZ_Q6	GGGTGGRR_PAX4_03		TGGAAA_NFAT_Q4_01
6299	SALL1	sal-like 1 (Drosophila)	GGGCGGR_SP1_Q6			GGGAGGRR_MAZ_Q6	GGGTGGRR_PAX4_03			AACTTT_UNKNOWN	CAGCTG_AP4_Q5	CTGCAGY_UNKNOWN
2260	FGFR1	fibroblast growth factor receptor 1	GGGCGGR_SP1_Q6			GGGAGGRR_MAZ_Q6	GGGTGGRR_PAX4_03			AACTTT_UNKNOWN		CTGCAGY_UNKNOWN
51631	LUC7L2	LUC7-like 2 (S. cerevisiae)	GGGCGGR_SP1_Q6			GGGAGGRR_MAZ_Q6	GGGTGGRR_PAX4_03			AACTTT_UNKNOWN
3725	JUN	jun proto-oncogene	GGGCGGR_SP1_Q6			GGGAGGRR_MAZ_Q6	GGGTGGRR_PAX4_03			AACTTT_UNKNOWN
10916	MAGED2	melanoma antigen family D, 2	GGGCGGR_SP1_Q6			GGGAGGRR_MAZ_Q6	GGGTGGRR_PAX4_03					CTGCAGY_UNKNOWN
4134	MAP4	microtubule-associated protein 4	GGGCGGR_SP1_Q6			GGGAGGRR_MAZ_Q6	GGGTGGRR_PAX4_03					CTGCAGY_UNKNOWN
4335	MNT	MAX binding protein	GGGCGGR_SP1_Q6			GGGAGGRR_MAZ_Q6	GGGTGGRR_PAX4_03
54922	RASIP1	Ras interacting protein 1	GGGCGGR_SP1_Q6			GGGAGGRR_MAZ_Q6	GGGTGGRR_PAX4_03
8675	STX16	syntaxin 16	GGGCGGR_SP1_Q6			GGGAGGRR_MAZ_Q6		TTGTTT_FOXO4_01	TGGAAA_NFAT_Q4_01			CTGCAGY_UNKNOWN
81558	FAM117A	family with sequence similarity 117, member A	GGGCGGR_SP1_Q6			GGGAGGRR_MAZ_Q6		TTGTTT_FOXO4_01	TGGAAA_NFAT_Q4_01
6667	SP1	Sp1 transcription factor	GGGCGGR_SP1_Q6			GGGAGGRR_MAZ_Q6		TTGTTT_FOXO4_01	TGGAAA_NFAT_Q4_01
9185	REPS2	RALBP1 associated Eps domain containing 2	GGGCGGR_SP1_Q6			GGGAGGRR_MAZ_Q6		TTGTTT_FOXO4_01		AACTTT_UNKNOWN	CAGCTG_AP4_Q5
83667	SESN2	sestrin 2	GGGCGGR_SP1_Q6			GGGAGGRR_MAZ_Q6		TTGTTT_FOXO4_01		AACTTT_UNKNOWN
599	BCL2L2	BCL2-like 2	GGGCGGR_SP1_Q6			GGGAGGRR_MAZ_Q6		TTGTTT_FOXO4_01			CAGCTG_AP4_Q5
22905	EPN2	epsin 2	GGGCGGR_SP1_Q6			GGGAGGRR_MAZ_Q6		TTGTTT_FOXO4_01			CAGCTG_AP4_Q5
5499	PPP1CA	protein phosphatase 1, catalytic subunit, alpha isozyme	GGGCGGR_SP1_Q6			GGGAGGRR_MAZ_Q6		TTGTTT_FOXO4_01
9166	EBAG9	estrogen receptor binding site associated, antigen, 9	GGGCGGR_SP1_Q6			GGGAGGRR_MAZ_Q6		TTGTTT_FOXO4_01
7422	VEGFA	vascular endothelial growth factor A	GGGCGGR_SP1_Q6			GGGAGGRR_MAZ_Q6			TGGAAA_NFAT_Q4_01	AACTTT_UNKNOWN	CAGCTG_AP4_Q5
7514	XPO1	exportin 1 (CRM1 homolog, yeast)	GGGCGGR_SP1_Q6			GGGAGGRR_MAZ_Q6			TGGAAA_NFAT_Q4_01	AACTTT_UNKNOWN		CTGCAGY_UNKNOWN
2029	ENSA	endosulfine alpha	GGGCGGR_SP1_Q6			GGGAGGRR_MAZ_Q6			TGGAAA_NFAT_Q4_01
3766	KCNJ10	potassium inwardly-rectifying channel, subfamily J, member 10	GGGCGGR_SP1_Q6			GGGAGGRR_MAZ_Q6			TGGAAA_NFAT_Q4_01
11000	SLC27A3	solute carrier family 27 (fatty acid transporter), member 3	GGGCGGR_SP1_Q6			GGGAGGRR_MAZ_Q6			TGGAAA_NFAT_Q4_01
22999	RIMS1	regulating synaptic membrane exocytosis 1	GGGCGGR_SP1_Q6			GGGAGGRR_MAZ_Q6				AACTTT_UNKNOWN	CAGCTG_AP4_Q5	CTGCAGY_UNKNOWN
3614	IMPDH1	IMP (inosine 5'-monophosphate) dehydrogenase 1	GGGCGGR_SP1_Q6			GGGAGGRR_MAZ_Q6				AACTTT_UNKNOWN	CAGCTG_AP4_Q5
5216	PFN1	profilin 1	GGGCGGR_SP1_Q6			GGGAGGRR_MAZ_Q6				AACTTT_UNKNOWN
7360	UGP2	UDP-glucose pyrophosphorylase 2	GGGCGGR_SP1_Q6			GGGAGGRR_MAZ_Q6				AACTTT_UNKNOWN
23082	PPRC1	peroxisome proliferator-activated receptor gamma, coactivator-related 1	GGGCGGR_SP1_Q6			GGGAGGRR_MAZ_Q6				AACTTT_UNKNOWN
22920	KIFAP3	kinesin-associated protein 3	GGGCGGR_SP1_Q6			GGGAGGRR_MAZ_Q6				AACTTT_UNKNOWN
23047	PDS5B	PDS5, regulator of cohesion maintenance, homolog B (S. cerevisiae)	GGGCGGR_SP1_Q6			GGGAGGRR_MAZ_Q6				AACTTT_UNKNOWN
2288	FKBP4	FK506 binding protein 4, 59kDa	GGGCGGR_SP1_Q6			GGGAGGRR_MAZ_Q6				AACTTT_UNKNOWN
91663	MYADM	myeloid-associated differentiation marker	GGGCGGR_SP1_Q6			GGGAGGRR_MAZ_Q6					CAGCTG_AP4_Q5
10092	ARPC5	actin related protein 2/3 complex, subunit 5, 16kDa	GGGCGGR_SP1_Q6			GGGAGGRR_MAZ_Q6						CTGCAGY_UNKNOWN
5598	MAPK7	mitogen-activated protein kinase 7	GGGCGGR_SP1_Q6			GGGAGGRR_MAZ_Q6						CTGCAGY_UNKNOWN
7408	VASP	vasodilator-stimulated phosphoprotein	GGGCGGR_SP1_Q6			GGGAGGRR_MAZ_Q6
1192	CLIC1	chloride intracellular channel 1	GGGCGGR_SP1_Q6			GGGAGGRR_MAZ_Q6
3329	HSPD1	heat shock 60kDa protein 1 (chaperonin)	GGGCGGR_SP1_Q6			GGGAGGRR_MAZ_Q6
26528	DAZAP1	DAZ associated protein 1	GGGCGGR_SP1_Q6			GGGAGGRR_MAZ_Q6
391	RHOG	ras homolog gene family, member G (rho G)	GGGCGGR_SP1_Q6			GGGAGGRR_MAZ_Q6
23415	KCNH4	potassium voltage-gated channel, subfamily H (eag-related), member 4	GGGCGGR_SP1_Q6			GGGAGGRR_MAZ_Q6
51062	ATL1	atlastin GTPase 1	GGGCGGR_SP1_Q6			GGGAGGRR_MAZ_Q6
55500	ETNK1	ethanolamine kinase 1	GGGCGGR_SP1_Q6			GGGAGGRR_MAZ_Q6
1973	EIF4A1	eukaryotic translation initiation factor 4A1	GGGCGGR_SP1_Q6			GGGAGGRR_MAZ_Q6
3417	IDH1	isocitrate dehydrogenase 1 (NADP+), soluble	GGGCGGR_SP1_Q6			GGGAGGRR_MAZ_Q6
1394	CRHR1	corticotropin releasing hormone receptor 1	GGGCGGR_SP1_Q6			GGGAGGRR_MAZ_Q6
56654	NPDC1	neural proliferation, differentiation and control, 1	GGGCGGR_SP1_Q6			GGGAGGRR_MAZ_Q6
79800	ALS2CR8	amyotrophic lateral sclerosis 2 (juvenile) chromosome region, candidate 8	GGGCGGR_SP1_Q6			GGGAGGRR_MAZ_Q6
10051	SMC4	structural maintenance of chromosomes 4	GGGCGGR_SP1_Q6			GGGAGGRR_MAZ_Q6
57560	IFT80	intraflagellar transport 80 homolog (Chlamydomonas)	GGGCGGR_SP1_Q6			GGGAGGRR_MAZ_Q6
10215	OLIG2	oligodendrocyte lineage transcription factor 2	GGGCGGR_SP1_Q6			GGGAGGRR_MAZ_Q6
90678	LRSAM1	leucine rich repeat and sterile alpha motif containing 1	GGGCGGR_SP1_Q6			GGGAGGRR_MAZ_Q6
126147	NTN5	netrin 5	GGGCGGR_SP1_Q6			GGGAGGRR_MAZ_Q6
10444	ZER1	zer-1 homolog (C. elegans)	GGGCGGR_SP1_Q6			GGGAGGRR_MAZ_Q6
10363	HMG20A	high mobility group 20A	GGGCGGR_SP1_Q6			GGGAGGRR_MAZ_Q6
10435	CDC42EP2	CDC42 effector protein (Rho GTPase binding) 2	GGGCGGR_SP1_Q6			GGGAGGRR_MAZ_Q6
5910	RAP1GDS1	RAP1, GTP-GDP dissociation stimulator 1	GGGCGGR_SP1_Q6			GGGAGGRR_MAZ_Q6
10312	TCIRG1	T-cell, immune regulator 1, ATPase, H+ transporting, lysosomal V0 subunit A3	GGGCGGR_SP1_Q6			GGGAGGRR_MAZ_Q6
6136	RPL12	ribosomal protein L12	GGGCGGR_SP1_Q6			GGGAGGRR_MAZ_Q6
10654	PMVK	phosphomevalonate kinase	GGGCGGR_SP1_Q6			GGGAGGRR_MAZ_Q6
7200	TRH	thyrotropin-releasing hormone	GGGCGGR_SP1_Q6			GGGAGGRR_MAZ_Q6
56479	KCNQ5	potassium voltage-gated channel, KQT-like subfamily, member 5	GGGCGGR_SP1_Q6				GGGTGGRR_PAX4_03	TTGTTT_FOXO4_01	TGGAAA_NFAT_Q4_01		CAGCTG_AP4_Q5
124935	SLC43A2	solute carrier family 43, member 2	GGGCGGR_SP1_Q6				GGGTGGRR_PAX4_03	TTGTTT_FOXO4_01	TGGAAA_NFAT_Q4_01
51673	TPPP3	tubulin polymerization-promoting protein family member 3	GGGCGGR_SP1_Q6				GGGTGGRR_PAX4_03	TTGTTT_FOXO4_01			CAGCTG_AP4_Q5	CTGCAGY_UNKNOWN
79142	PHF23	PHD finger protein 23	GGGCGGR_SP1_Q6				GGGTGGRR_PAX4_03	TTGTTT_FOXO4_01			CAGCTG_AP4_Q5
51069	MRPL2	mitochondrial ribosomal protein L2	GGGCGGR_SP1_Q6				GGGTGGRR_PAX4_03	TTGTTT_FOXO4_01
25906	C11orf51	chromosome 11 open reading frame 51	GGGCGGR_SP1_Q6				GGGTGGRR_PAX4_03	TTGTTT_FOXO4_01
8499	PPFIA2	protein tyrosine phosphatase, receptor type, f polypeptide (PTPRF), interacting protein (liprin), alpha 2	GGGCGGR_SP1_Q6				GGGTGGRR_PAX4_03		TGGAAA_NFAT_Q4_01	AACTTT_UNKNOWN
4641	MYO1C	myosin IC	GGGCGGR_SP1_Q6				GGGTGGRR_PAX4_03		TGGAAA_NFAT_Q4_01		CAGCTG_AP4_Q5
89848	FCHSD1	FCH and double SH3 domains 1	GGGCGGR_SP1_Q6				GGGTGGRR_PAX4_03		TGGAAA_NFAT_Q4_01
51754	TMEM8B	transmembrane protein 8B	GGGCGGR_SP1_Q6				GGGTGGRR_PAX4_03				CAGCTG_AP4_Q5
56658	TRIM39	tripartite motif containing 39	GGGCGGR_SP1_Q6				GGGTGGRR_PAX4_03				CAGCTG_AP4_Q5
11059	WWP1	WW domain containing E3 ubiquitin protein ligase 1	GGGCGGR_SP1_Q6				GGGTGGRR_PAX4_03					CTGCAGY_UNKNOWN
2026	ENO2	enolase 2 (gamma, neuronal)	GGGCGGR_SP1_Q6				GGGTGGRR_PAX4_03					CTGCAGY_UNKNOWN
7094	TLN1	talin 1	GGGCGGR_SP1_Q6				GGGTGGRR_PAX4_03
7317	UBA1	ubiquitin-like modifier activating enzyme 1	GGGCGGR_SP1_Q6				GGGTGGRR_PAX4_03
2771	GNAI2	guanine nucleotide binding protein (G protein), alpha inhibiting activity polypeptide 2	GGGCGGR_SP1_Q6				GGGTGGRR_PAX4_03
8986	RPS6KA4	ribosomal protein S6 kinase, 90kDa, polypeptide 4	GGGCGGR_SP1_Q6				GGGTGGRR_PAX4_03
5899	RALB	v-ral simian leukemia viral oncogene homolog B (ras related; GTP binding protein)	GGGCGGR_SP1_Q6				GGGTGGRR_PAX4_03
8704	B4GALT2	UDP-Gal:betaGlcNAc beta 1,4- galactosyltransferase, polypeptide 2	GGGCGGR_SP1_Q6				GGGTGGRR_PAX4_03
23139	MAST2	microtubule associated serine/threonine kinase 2	GGGCGGR_SP1_Q6				GGGTGGRR_PAX4_03
26262	TSPAN17	tetraspanin 17	GGGCGGR_SP1_Q6				GGGTGGRR_PAX4_03
118	ADD1	adducin 1 (alpha)	GGGCGGR_SP1_Q6				GGGTGGRR_PAX4_03
1801	DPH1	DPH1 homolog (S. cerevisiae)	GGGCGGR_SP1_Q6					TTGTTT_FOXO4_01	TGGAAA_NFAT_Q4_01		CAGCTG_AP4_Q5
54521	WDR44	WD repeat domain 44	GGGCGGR_SP1_Q6					TTGTTT_FOXO4_01	TGGAAA_NFAT_Q4_01
6541	SLC7A1	solute carrier family 7 (cationic amino acid transporter, y+ system), member 1	GGGCGGR_SP1_Q6					TTGTTT_FOXO4_01	TGGAAA_NFAT_Q4_01
9657	IQCB1	IQ motif containing B1	GGGCGGR_SP1_Q6					TTGTTT_FOXO4_01	TGGAAA_NFAT_Q4_01
8999	CDKL2	cyclin-dependent kinase-like 2 (CDC2-related kinase)	GGGCGGR_SP1_Q6					TTGTTT_FOXO4_01	TGGAAA_NFAT_Q4_01
83473	KATNAL2	katanin p60 subunit A-like 2	GGGCGGR_SP1_Q6					TTGTTT_FOXO4_01	TGGAAA_NFAT_Q4_01
26056	RAB11FIP5	RAB11 family interacting protein 5 (class I)	GGGCGGR_SP1_Q6					TTGTTT_FOXO4_01		AACTTT_UNKNOWN
10857	PGRMC1	progesterone receptor membrane component 1	GGGCGGR_SP1_Q6					TTGTTT_FOXO4_01		AACTTT_UNKNOWN
4259	MGST3	microsomal glutathione S-transferase 3	GGGCGGR_SP1_Q6					TTGTTT_FOXO4_01
3780	KCNN1	potassium intermediate/small conductance calcium-activated channel, subfamily N, member 1	GGGCGGR_SP1_Q6					TTGTTT_FOXO4_01
5663	PSEN1	presenilin 1	GGGCGGR_SP1_Q6					TTGTTT_FOXO4_01
4678	NASP	nuclear autoantigenic sperm protein (histone-binding)	GGGCGGR_SP1_Q6					TTGTTT_FOXO4_01
3145	HMBS	hydroxymethylbilane synthase	GGGCGGR_SP1_Q6					TTGTTT_FOXO4_01
55974	SLC50A1	solute carrier family 50 (sugar transporter), member 1	GGGCGGR_SP1_Q6					TTGTTT_FOXO4_01
81876	RAB1B	RAB1B, member RAS oncogene family	GGGCGGR_SP1_Q6					TTGTTT_FOXO4_01
7862	BRPF1	bromodomain and PHD finger containing, 1	GGGCGGR_SP1_Q6					TTGTTT_FOXO4_01
9585	KIF20B	kinesin family member 20B	GGGCGGR_SP1_Q6					TTGTTT_FOXO4_01
375	ARF1	ADP-ribosylation factor 1	GGGCGGR_SP1_Q6					TTGTTT_FOXO4_01
83943	IMMP2L	IMP2 inner mitochondrial membrane peptidase-like (S. cerevisiae)	GGGCGGR_SP1_Q6					TTGTTT_FOXO4_01
2201	FBN2	fibrillin 2	GGGCGGR_SP1_Q6					TTGTTT_FOXO4_01
10818	FRS2	fibroblast growth factor receptor substrate 2	GGGCGGR_SP1_Q6					TTGTTT_FOXO4_01
622	BDH1	3-hydroxybutyrate dehydrogenase, type 1	GGGCGGR_SP1_Q6					TTGTTT_FOXO4_01
55014	STX17	syntaxin 17	GGGCGGR_SP1_Q6					TTGTTT_FOXO4_01
30061	SLC40A1	solute carrier family 40 (iron-regulated transporter), member 1	GGGCGGR_SP1_Q6					TTGTTT_FOXO4_01
30011	SH3KBP1	SH3-domain kinase binding protein 1	GGGCGGR_SP1_Q6						TGGAAA_NFAT_Q4_01	AACTTT_UNKNOWN
90550	MCU	mitochondrial calcium uniporter	GGGCGGR_SP1_Q6						TGGAAA_NFAT_Q4_01	AACTTT_UNKNOWN
10725	NFAT5	nuclear factor of activated T-cells 5, tonicity-responsive	GGGCGGR_SP1_Q6						TGGAAA_NFAT_Q4_01	AACTTT_UNKNOWN
1154	CISH	cytokine inducible SH2-containing protein	GGGCGGR_SP1_Q6						TGGAAA_NFAT_Q4_01	AACTTT_UNKNOWN
54361	WNT4	wingless-type MMTV integration site family, member 4	GGGCGGR_SP1_Q6						TGGAAA_NFAT_Q4_01		CAGCTG_AP4_Q5
6238	RRBP1	ribosome binding protein 1 homolog 180kDa (dog)	GGGCGGR_SP1_Q6						TGGAAA_NFAT_Q4_01
8655	DYNLL1	dynein, light chain, LC8-type 1	GGGCGGR_SP1_Q6						TGGAAA_NFAT_Q4_01
79143	MBOAT7	membrane bound O-acyltransferase domain containing 7	GGGCGGR_SP1_Q6						TGGAAA_NFAT_Q4_01
57718	PPP4R4	protein phosphatase 4, regulatory subunit 4	GGGCGGR_SP1_Q6						TGGAAA_NFAT_Q4_01
790	CAD	carbamoyl-phosphate synthetase 2, aspartate transcarbamylase, and dihydroorotase	GGGCGGR_SP1_Q6						TGGAAA_NFAT_Q4_01
54704	PDP1	pyruvate dehyrogenase phosphatase catalytic subunit 1	GGGCGGR_SP1_Q6						TGGAAA_NFAT_Q4_01
80321	CEP70	centrosomal protein 70kDa	GGGCGGR_SP1_Q6						TGGAAA_NFAT_Q4_01
57534	MIB1	mindbomb homolog 1 (Drosophila)	GGGCGGR_SP1_Q6						TGGAAA_NFAT_Q4_01
1464	CSPG4	chondroitin sulfate proteoglycan 4	GGGCGGR_SP1_Q6						TGGAAA_NFAT_Q4_01
148741	ANKRD35	ankyrin repeat domain 35	GGGCGGR_SP1_Q6						TGGAAA_NFAT_Q4_01
4649	MYO9A	myosin IXA	GGGCGGR_SP1_Q6						TGGAAA_NFAT_Q4_01
3363	HTR7	5-hydroxytryptamine (serotonin) receptor 7 (adenylate cyclase-coupled)	GGGCGGR_SP1_Q6						TGGAAA_NFAT_Q4_01
10211	FLOT1	flotillin 1	GGGCGGR_SP1_Q6						TGGAAA_NFAT_Q4_01
5786	PTPRA	protein tyrosine phosphatase, receptor type, A	GGGCGGR_SP1_Q6						TGGAAA_NFAT_Q4_01
387338	NSUN4	NOP2/Sun domain family, member 4	GGGCGGR_SP1_Q6						TGGAAA_NFAT_Q4_01
3490	IGFBP7	insulin-like growth factor binding protein 7	GGGCGGR_SP1_Q6						TGGAAA_NFAT_Q4_01
127544	RNF19B	ring finger protein 19B	GGGCGGR_SP1_Q6							AACTTT_UNKNOWN	CAGCTG_AP4_Q5
6786	STIM1	stromal interaction molecule 1	GGGCGGR_SP1_Q6							AACTTT_UNKNOWN	CAGCTG_AP4_Q5
51347	TAOK3	TAO kinase 3	GGGCGGR_SP1_Q6							AACTTT_UNKNOWN
7465	WEE1	WEE1 homolog (S. pombe)	GGGCGGR_SP1_Q6							AACTTT_UNKNOWN
25923	ATL3	atlastin GTPase 3	GGGCGGR_SP1_Q6							AACTTT_UNKNOWN
5567	PRKACB	protein kinase, cAMP-dependent, catalytic, beta	GGGCGGR_SP1_Q6							AACTTT_UNKNOWN
90203	SNX21	sorting nexin family member 21	GGGCGGR_SP1_Q6							AACTTT_UNKNOWN
55117	SLC6A15	solute carrier family 6 (neutral amino acid transporter), member 15	GGGCGGR_SP1_Q6							AACTTT_UNKNOWN
387893	SETD8	SET domain containing (lysine methyltransferase) 8	GGGCGGR_SP1_Q6							AACTTT_UNKNOWN
131034	CPNE4	copine IV	GGGCGGR_SP1_Q6							AACTTT_UNKNOWN
9358	ITGBL1	integrin, beta-like 1 (with EGF-like repeat domains)	GGGCGGR_SP1_Q6							AACTTT_UNKNOWN
8745	ADAM23	ADAM metallopeptidase domain 23	GGGCGGR_SP1_Q6							AACTTT_UNKNOWN
1272	CNTN1	contactin 1	GGGCGGR_SP1_Q6							AACTTT_UNKNOWN
2786	GNG4	guanine nucleotide binding protein (G protein), gamma 4	GGGCGGR_SP1_Q6							AACTTT_UNKNOWN
5565	PRKAB2	protein kinase, AMP-activated, beta 2 non-catalytic subunit	GGGCGGR_SP1_Q6							AACTTT_UNKNOWN
7220	TRPC1	transient receptor potential cation channel, subfamily C, member 1	GGGCGGR_SP1_Q6							AACTTT_UNKNOWN
81609	SNX27	sorting nexin family member 27	GGGCGGR_SP1_Q6							AACTTT_UNKNOWN
56936	C14orf162	chromosome 14 open reading frame 162	GGGCGGR_SP1_Q6								CAGCTG_AP4_Q5	CTGCAGY_UNKNOWN
6843	VAMP1	vesicle-associated membrane protein 1 (synaptobrevin 1)	GGGCGGR_SP1_Q6								CAGCTG_AP4_Q5
11186	RASSF1	Ras association (RalGDS/AF-6) domain family member 1	GGGCGGR_SP1_Q6								CAGCTG_AP4_Q5
54795	TRPM4	transient receptor potential cation channel, subfamily M, member 4	GGGCGGR_SP1_Q6								CAGCTG_AP4_Q5
29890	RBM15B	RNA binding motif protein 15B	GGGCGGR_SP1_Q6								CAGCTG_AP4_Q5
23457	ABCB9	ATP-binding cassette, sub-family B (MDR/TAP), member 9	GGGCGGR_SP1_Q6								CAGCTG_AP4_Q5
118426	LOH12CR1	loss of heterozygosity, 12, chromosomal region 1	GGGCGGR_SP1_Q6								CAGCTG_AP4_Q5
7295	TXN	thioredoxin	GGGCGGR_SP1_Q6								CAGCTG_AP4_Q5
3092	HIP1	huntingtin interacting protein 1	GGGCGGR_SP1_Q6								CAGCTG_AP4_Q5
63939	C20orf177	chromosome 20 open reading frame 177	GGGCGGR_SP1_Q6								CAGCTG_AP4_Q5
115703	ARHGAP33	Rho GTPase activating protein 33	GGGCGGR_SP1_Q6								CAGCTG_AP4_Q5
7920	ABHD16A	abhydrolase domain containing 16A	GGGCGGR_SP1_Q6								CAGCTG_AP4_Q5
79644	SRD5A3	steroid 5 alpha-reductase 3	GGGCGGR_SP1_Q6								CAGCTG_AP4_Q5
6945	MLX	MAX-like protein X	GGGCGGR_SP1_Q6									CTGCAGY_UNKNOWN
195828	ZNF367	zinc finger protein 367	GGGCGGR_SP1_Q6									CTGCAGY_UNKNOWN
23623	RUSC1	RUN and SH3 domain containing 1	GGGCGGR_SP1_Q6									CTGCAGY_UNKNOWN
9530	BAG4	BCL2-associated athanogene 4	GGGCGGR_SP1_Q6									CTGCAGY_UNKNOWN
63891	RNF123	ring finger protein 123	GGGCGGR_SP1_Q6									CTGCAGY_UNKNOWN
116496	FAM129A	family with sequence similarity 129, member A	GGGCGGR_SP1_Q6									CTGCAGY_UNKNOWN
3313	HSPA9	heat shock 70kDa protein 9 (mortalin)	GGGCGGR_SP1_Q6
201232	SLC16A13	solute carrier family 16, member 13 (monocarboxylic acid transporter 13)	GGGCGGR_SP1_Q6
57530	CGN	cingulin	GGGCGGR_SP1_Q6
55753	OGDHL	oxoglutarate dehydrogenase-like	GGGCGGR_SP1_Q6
1173	AP2M1	adaptor-related protein complex 2, mu 1 subunit	GGGCGGR_SP1_Q6
201191	SAMD14	sterile alpha motif domain containing 14	GGGCGGR_SP1_Q6
6191	RPS4X	ribosomal protein S4, X-linked	GGGCGGR_SP1_Q6
28957	MRPS28	mitochondrial ribosomal protein S28	GGGCGGR_SP1_Q6
118881	COMTD1	catechol-O-methyltransferase domain containing 1	GGGCGGR_SP1_Q6
127829	ARL8A	ADP-ribosylation factor-like 8A	GGGCGGR_SP1_Q6
25827	FBXL2	F-box and leucine-rich repeat protein 2	GGGCGGR_SP1_Q6
7041	TGFB1I1	transforming growth factor beta 1 induced transcript 1	GGGCGGR_SP1_Q6
84330	ZNF414	zinc finger protein 414	GGGCGGR_SP1_Q6
60678	EEFSEC	eukaryotic elongation factor, selenocysteine-tRNA-specific	GGGCGGR_SP1_Q6
1944	EFNA3	ephrin-A3	GGGCGGR_SP1_Q6
55236	UBA6	ubiquitin-like modifier activating enzyme 6	GGGCGGR_SP1_Q6
63826	SRR	serine racemase	GGGCGGR_SP1_Q6
811	CALR	calreticulin	GGGCGGR_SP1_Q6
11140	CDC37	cell division cycle 37 homolog (S. cerevisiae)	GGGCGGR_SP1_Q6
7818	DAP3	death associated protein 3	GGGCGGR_SP1_Q6
79183	TTPAL	tocopherol (alpha) transfer protein-like	GGGCGGR_SP1_Q6
87	ACTN1	actinin, alpha 1	GGGCGGR_SP1_Q6
3688	ITGB1	integrin, beta 1 (fibronectin receptor, beta polypeptide, antigen CD29 includes MDF2, MSK12)	GGGCGGR_SP1_Q6
23339	VPS39	vacuolar protein sorting 39 homolog (S. cerevisiae)	GGGCGGR_SP1_Q6
7087	ICAM5	intercellular adhesion molecule 5, telencephalin	GGGCGGR_SP1_Q6
79411	GLB1L	galactosidase, beta 1-like	GGGCGGR_SP1_Q6
2002	ELK1	ELK1, member of ETS oncogene family	GGGCGGR_SP1_Q6
9779	TBC1D5	TBC1 domain family, member 5	GGGCGGR_SP1_Q6
80142	PTGES2	prostaglandin E synthase 2	GGGCGGR_SP1_Q6
254042	METAP1D	methionyl aminopeptidase type 1D (mitochondrial)	GGGCGGR_SP1_Q6
126792	B3GALT6	UDP-Gal:betaGal beta 1,3-galactosyltransferase polypeptide 6	GGGCGGR_SP1_Q6
57143	ADCK1	aarF domain containing kinase 1	GGGCGGR_SP1_Q6
8065	CUL5	cullin 5	GGGCGGR_SP1_Q6
80254	CEP63	centrosomal protein 63kDa	GGGCGGR_SP1_Q6
1153	CIRBP	cold inducible RNA binding protein	GGGCGGR_SP1_Q6
7203	CCT3	chaperonin containing TCP1, subunit 3 (gamma)	GGGCGGR_SP1_Q6
55573	CDV3	CDV3 homolog (mouse)	GGGCGGR_SP1_Q6
5178	PEG3	paternally expressed 3	GGGCGGR_SP1_Q6
54957	TXNL4B	thioredoxin-like 4B	GGGCGGR_SP1_Q6
9785	DHX38	DEAH (Asp-Glu-Ala-His) box polypeptide 38	GGGCGGR_SP1_Q6
9552	SPAG7	sperm associated antigen 7	GGGCGGR_SP1_Q6
7342	UBP1	upstream binding protein 1 (LBP-1a)	GGGCGGR_SP1_Q6
983	CDK1	cyclin-dependent kinase 1	GGGCGGR_SP1_Q6
7153	TOP2A	topoisomerase (DNA) II alpha 170kDa	GGGCGGR_SP1_Q6
9924	PAN2	PAN2 poly(A) specific ribonuclease subunit homolog (S. cerevisiae)	GGGCGGR_SP1_Q6
4548	MTR	5-methyltetrahydrofolate-homocysteine methyltransferase	GGGCGGR_SP1_Q6
54509	RHOF	ras homolog gene family, member F (in filopodia)	GGGCGGR_SP1_Q6
7108	TM7SF2	transmembrane 7 superfamily member 2	GGGCGGR_SP1_Q6
2222	FDFT1	farnesyl-diphosphate farnesyltransferase 1	GGGCGGR_SP1_Q6
9918	NCAPD2	non-SMC condensin I complex, subunit D2	GGGCGGR_SP1_Q6
4597	MVD	mevalonate (diphospho) decarboxylase	GGGCGGR_SP1_Q6
7517	XRCC3	X-ray repair complementing defective repair in Chinese hamster cells 3	GGGCGGR_SP1_Q6
116448	OLIG1	oligodendrocyte transcription factor 1	GGGCGGR_SP1_Q6
4247	MGAT2	mannosyl (alpha-1,6-)-glycoprotein beta-1,2-N-acetylglucosaminyltransferase	GGGCGGR_SP1_Q6
11093	ADAMTS13	ADAM metallopeptidase with thrombospondin type 1 motif, 13	GGGCGGR_SP1_Q6
51629	SLC25A39	solute carrier family 25, member 39	GGGCGGR_SP1_Q6
6576	SLC25A1	solute carrier family 25 (mitochondrial carrier; citrate transporter), member 1	GGGCGGR_SP1_Q6
29985	SLC39A3	solute carrier family 39 (zinc transporter), member 3	GGGCGGR_SP1_Q6
144715	RAD9B	RAD9 homolog B (S. pombe)	GGGCGGR_SP1_Q6
4122	MAN2A2	mannosidase, alpha, class 2A, member 2	GGGCGGR_SP1_Q6
27012	KCNV1	potassium channel, subfamily V, member 1	GGGCGGR_SP1_Q6
154661	RUNDC3B	RUN domain containing 3B	GGGCGGR_SP1_Q6
826	CAPNS1	calpain, small subunit 1	GGGCGGR_SP1_Q6
5771	PTPN2	protein tyrosine phosphatase, non-receptor type 2	GGGCGGR_SP1_Q6
64793	CEP85	centrosomal protein 85kDa	GGGCGGR_SP1_Q6
6251	RSU1	Ras suppressor protein 1	GGGCGGR_SP1_Q6
80776	B9D2	B9 protein domain 2	GGGCGGR_SP1_Q6
23315	SLC9A8	solute carrier family 9 (sodium/hydrogen exchanger), member 8	GGGCGGR_SP1_Q6
5333	PLCD1	phospholipase C, delta 1	GGGCGGR_SP1_Q6
150771	ITPRIPL1	inositol 1,4,5-trisphosphate receptor interacting protein-like 1	GGGCGGR_SP1_Q6
139065	SLITRK4	SLIT and NTRK-like family, member 4	GGGCGGR_SP1_Q6
9978	RBX1	ring-box 1, E3 ubiquitin protein ligase	GGGCGGR_SP1_Q6
9695	EDEM1	ER degradation enhancer, mannosidase alpha-like 1	GGGCGGR_SP1_Q6
54432	YIPF1	Yip1 domain family, member 1	GGGCGGR_SP1_Q6
23474	ETHE1	ethylmalonic encephalopathy 1	GGGCGGR_SP1_Q6
55247	NEIL3	nei endonuclease VIII-like 3 (E. coli)	GGGCGGR_SP1_Q6
9367	RAB9A	RAB9A, member RAS oncogene family	GGGCGGR_SP1_Q6
7508	XPC	xeroderma pigmentosum, complementation group C	GGGCGGR_SP1_Q6
55466	DNAJA4	DnaJ (Hsp40) homolog, subfamily A, member 4	GGGCGGR_SP1_Q6
57794	SUGP1	SURP and G patch domain containing 1	GGGCGGR_SP1_Q6
114757	CYGB	cytoglobin	GGGCGGR_SP1_Q6
3382	ICA1	islet cell autoantigen 1, 69kDa	GGGCGGR_SP1_Q6
4502	MT2A	metallothionein 2A	GGGCGGR_SP1_Q6
3684	ITGAM	integrin, alpha M (complement component 3 receptor 3 subunit)	GGGCGGR_SP1_Q6
51203	NUSAP1	nucleolar and spindle associated protein 1	GGGCGGR_SP1_Q6
57214	KIAA1199	KIAA1199	GGGCGGR_SP1_Q6
26013	L3MBTL1	l(3)mbt-like 1 (Drosophila)	GGGCGGR_SP1_Q6
4128	MAOA	monoamine oxidase A	GGGCGGR_SP1_Q6
84932	RAB2B	RAB2B, member RAS oncogene family	GGGCGGR_SP1_Q6
6861	SYT5	synaptotagmin V	GGGCGGR_SP1_Q6
51374	C2orf28	chromosome 2 open reading frame 28	GGGCGGR_SP1_Q6
8884	SLC5A6	solute carrier family 5 (sodium-dependent vitamin transporter), member 6	GGGCGGR_SP1_Q6
92400	RBM18	RNA binding motif protein 18	GGGCGGR_SP1_Q6
56848	SPHK2	sphingosine kinase 2	GGGCGGR_SP1_Q6
1595	CYP51A1	cytochrome P450, family 51, subfamily A, polypeptide 1	GGGCGGR_SP1_Q6
51112	TTC15	tetratricopeptide repeat domain 15	GGGCGGR_SP1_Q6
114928	GPRASP2	G protein-coupled receptor associated sorting protein 2	GGGCGGR_SP1_Q6
257218	SHPRH	SNF2 histone linker PHD RING helicase	GGGCGGR_SP1_Q6
54878	DPP8	dipeptidyl-peptidase 8	GGGCGGR_SP1_Q6
26155	NOC2L	nucleolar complex associated 2 homolog (S. cerevisiae)	GGGCGGR_SP1_Q6
85437	ZCRB1	zinc finger CCHC-type and RNA binding motif 1	GGGCGGR_SP1_Q6
29800	ZDHHC1	zinc finger, DHHC-type containing 1	GGGCGGR_SP1_Q6
10126	DNAL4	dynein, axonemal, light chain 4	GGGCGGR_SP1_Q6
3978	LIG1	ligase I, DNA, ATP-dependent	GGGCGGR_SP1_Q6
6885	MAP3K7	mitogen-activated protein kinase kinase kinase 7	GGGCGGR_SP1_Q6
53637	S1PR5	sphingosine-1-phosphate receptor 5	GGGCGGR_SP1_Q6
23557	SNAPIN	SNAP-associated protein	GGGCGGR_SP1_Q6
2319	FLOT2	flotillin 2	GGGCGGR_SP1_Q6
29904	EEF2K	eukaryotic elongation factor-2 kinase	GGGCGGR_SP1_Q6
9377	COX5A	cytochrome c oxidase subunit Va	GGGCGGR_SP1_Q6
5702	PSMC3	proteasome (prosome, macropain) 26S subunit, ATPase, 3	GGGCGGR_SP1_Q6
91612	CHURC1	churchill domain containing 1	GGGCGGR_SP1_Q6
85007	AGXT2L2	alanine-glyoxylate aminotransferase 2-like 2	GGGCGGR_SP1_Q6
340371	NRBP2	nuclear receptor binding protein 2	GGGCGGR_SP1_Q6
83930	STARD3NL	STARD3 N-terminal like	GGGCGGR_SP1_Q6
22927	HABP4	hyaluronan binding protein 4	GGGCGGR_SP1_Q6
126074	C19orf39	chromosome 19 open reading frame 39	GGGCGGR_SP1_Q6
7841	MOGS	mannosyl-oligosaccharide glucosidase	GGGCGGR_SP1_Q6
56942	C16orf61	chromosome 16 open reading frame 61	GGGCGGR_SP1_Q6
64175	LEPRE1	leucine proline-enriched proteoglycan (leprecan) 1	GGGCGGR_SP1_Q6
10966	RAB40B	RAB40B, member RAS oncogene family	GGGCGGR_SP1_Q6
128240	APOA1BP	apolipoprotein A-I binding protein	GGGCGGR_SP1_Q6
147965	FAM98C	family with sequence similarity 98, member C	GGGCGGR_SP1_Q6
150468	CKAP2L	cytoskeleton associated protein 2-like	GGGCGGR_SP1_Q6
353	APRT	adenine phosphoribosyltransferase	GGGCGGR_SP1_Q6
39	ACAT2	acetyl-CoA acetyltransferase 2	GGGCGGR_SP1_Q6
4043	LRPAP1	low density lipoprotein receptor-related protein associated protein 1	GGGCGGR_SP1_Q6
4437	MSH3	mutS homolog 3 (E. coli)	GGGCGGR_SP1_Q6
4986	OPRK1	opioid receptor, kappa 1	GGGCGGR_SP1_Q6
51071	DERA	deoxyribose-phosphate aldolase (putative)	GGGCGGR_SP1_Q6
51478	HSD17B7	hydroxysteroid (17-beta) dehydrogenase 7	GGGCGGR_SP1_Q6
55320	MIS18BP1	MIS18 binding protein 1	GGGCGGR_SP1_Q6
55582	KIF27	kinesin family member 27	GGGCGGR_SP1_Q6
63827	BCAN	brevican	GGGCGGR_SP1_Q6
65992	DDRGK1	DDRGK domain containing 1	GGGCGGR_SP1_Q6
79830	ZMYM1	zinc finger, MYM-type 1	GGGCGGR_SP1_Q6
79831	JMJD5	jumonji domain containing 5	GGGCGGR_SP1_Q6
79850	FAM57A	family with sequence similarity 57, member A	GGGCGGR_SP1_Q6
9055	PRC1	protein regulator of cytokinesis 1	GGGCGGR_SP1_Q6
94056	SYAP1	synapse associated protein 1	GGGCGGR_SP1_Q6
1996	ELAVL4	ELAV (embryonic lethal, abnormal vision, Drosophila)-like 4 (Hu antigen D)		CAGGTG_E12_Q6	CTTTGT_LEF1_Q2	GGGAGGRR_MAZ_Q6	GGGTGGRR_PAX4_03	TTGTTT_FOXO4_01	TGGAAA_NFAT_Q4_01	AACTTT_UNKNOWN		CTGCAGY_UNKNOWN
3084	NRG1	neuregulin 1		CAGGTG_E12_Q6	CTTTGT_LEF1_Q2	GGGAGGRR_MAZ_Q6	GGGTGGRR_PAX4_03	TTGTTT_FOXO4_01	TGGAAA_NFAT_Q4_01	AACTTT_UNKNOWN		CTGCAGY_UNKNOWN
7170	TPM3	tropomyosin 3		CAGGTG_E12_Q6	CTTTGT_LEF1_Q2	GGGAGGRR_MAZ_Q6	GGGTGGRR_PAX4_03		TGGAAA_NFAT_Q4_01	AACTTT_UNKNOWN	CAGCTG_AP4_Q5
116154	PHACTR3	phosphatase and actin regulator 3		CAGGTG_E12_Q6	CTTTGT_LEF1_Q2	GGGAGGRR_MAZ_Q6	GGGTGGRR_PAX4_03		TGGAAA_NFAT_Q4_01	AACTTT_UNKNOWN		CTGCAGY_UNKNOWN
120	ADD3	adducin 3 (gamma)		CAGGTG_E12_Q6	CTTTGT_LEF1_Q2	GGGAGGRR_MAZ_Q6	GGGTGGRR_PAX4_03		TGGAAA_NFAT_Q4_01	AACTTT_UNKNOWN		CTGCAGY_UNKNOWN
6663	SOX10	SRY (sex determining region Y)-box 10		CAGGTG_E12_Q6	CTTTGT_LEF1_Q2	GGGAGGRR_MAZ_Q6	GGGTGGRR_PAX4_03		TGGAAA_NFAT_Q4_01		CAGCTG_AP4_Q5	CTGCAGY_UNKNOWN
56963	RGMA	RGM domain family, member A		CAGGTG_E12_Q6	CTTTGT_LEF1_Q2	GGGAGGRR_MAZ_Q6	GGGTGGRR_PAX4_03			AACTTT_UNKNOWN
6900	CNTN2	contactin 2 (axonal)		CAGGTG_E12_Q6	CTTTGT_LEF1_Q2	GGGAGGRR_MAZ_Q6	GGGTGGRR_PAX4_03				CAGCTG_AP4_Q5	CTGCAGY_UNKNOWN
51087	YBX2	Y box binding protein 2		CAGGTG_E12_Q6	CTTTGT_LEF1_Q2	GGGAGGRR_MAZ_Q6	GGGTGGRR_PAX4_03				CAGCTG_AP4_Q5
7066	THPO	thrombopoietin		CAGGTG_E12_Q6	CTTTGT_LEF1_Q2	GGGAGGRR_MAZ_Q6	GGGTGGRR_PAX4_03				CAGCTG_AP4_Q5
57509	MTUS1	microtubule associated tumor suppressor 1		CAGGTG_E12_Q6	CTTTGT_LEF1_Q2	GGGAGGRR_MAZ_Q6	GGGTGGRR_PAX4_03					CTGCAGY_UNKNOWN
10123	ARL4C	ADP-ribosylation factor-like 4C		CAGGTG_E12_Q6	CTTTGT_LEF1_Q2	GGGAGGRR_MAZ_Q6	GGGTGGRR_PAX4_03
55885	LMO3	LIM domain only 3 (rhombotin-like 2)		CAGGTG_E12_Q6	CTTTGT_LEF1_Q2	GGGAGGRR_MAZ_Q6		TTGTTT_FOXO4_01	TGGAAA_NFAT_Q4_01	AACTTT_UNKNOWN		CTGCAGY_UNKNOWN
5998	RGS3	regulator of G-protein signaling 3		CAGGTG_E12_Q6	CTTTGT_LEF1_Q2	GGGAGGRR_MAZ_Q6		TTGTTT_FOXO4_01	TGGAAA_NFAT_Q4_01	AACTTT_UNKNOWN
6781	STC1	stanniocalcin 1		CAGGTG_E12_Q6	CTTTGT_LEF1_Q2	GGGAGGRR_MAZ_Q6		TTGTTT_FOXO4_01	TGGAAA_NFAT_Q4_01	AACTTT_UNKNOWN
10100	TSPAN2	tetraspanin 2		CAGGTG_E12_Q6	CTTTGT_LEF1_Q2	GGGAGGRR_MAZ_Q6		TTGTTT_FOXO4_01	TGGAAA_NFAT_Q4_01	AACTTT_UNKNOWN
10752	CHL1	cell adhesion molecule with homology to L1CAM (close homolog of L1)		CAGGTG_E12_Q6	CTTTGT_LEF1_Q2	GGGAGGRR_MAZ_Q6		TTGTTT_FOXO4_01	TGGAAA_NFAT_Q4_01
6860	SYT4	synaptotagmin IV		CAGGTG_E12_Q6	CTTTGT_LEF1_Q2	GGGAGGRR_MAZ_Q6		TTGTTT_FOXO4_01	TGGAAA_NFAT_Q4_01
9363	RAB33A	RAB33A, member RAS oncogene family		CAGGTG_E12_Q6	CTTTGT_LEF1_Q2	GGGAGGRR_MAZ_Q6		TTGTTT_FOXO4_01			CAGCTG_AP4_Q5
59353	TMEM35	transmembrane protein 35		CAGGTG_E12_Q6	CTTTGT_LEF1_Q2	GGGAGGRR_MAZ_Q6			TGGAAA_NFAT_Q4_01	AACTTT_UNKNOWN	CAGCTG_AP4_Q5
2353	FOS	FBJ murine osteosarcoma viral oncogene homolog		CAGGTG_E12_Q6	CTTTGT_LEF1_Q2	GGGAGGRR_MAZ_Q6			TGGAAA_NFAT_Q4_01	AACTTT_UNKNOWN		CTGCAGY_UNKNOWN
11060	WWP2	WW domain containing E3 ubiquitin protein ligase 2		CAGGTG_E12_Q6	CTTTGT_LEF1_Q2	GGGAGGRR_MAZ_Q6			TGGAAA_NFAT_Q4_01	AACTTT_UNKNOWN
10493	VAT1	vesicle amine transport protein 1 homolog (T. californica)		CAGGTG_E12_Q6	CTTTGT_LEF1_Q2	GGGAGGRR_MAZ_Q6					CAGCTG_AP4_Q5
9312	KCNB2	potassium voltage-gated channel, Shab-related subfamily, member 2		CAGGTG_E12_Q6	CTTTGT_LEF1_Q2	GGGAGGRR_MAZ_Q6
54874	FNBP1L	formin binding protein 1-like		CAGGTG_E12_Q6	CTTTGT_LEF1_Q2	GGGAGGRR_MAZ_Q6
23208	SYT11	synaptotagmin XI		CAGGTG_E12_Q6	CTTTGT_LEF1_Q2	GGGAGGRR_MAZ_Q6
114900	C1QTNF4	C1q and tumor necrosis factor related protein 4		CAGGTG_E12_Q6	CTTTGT_LEF1_Q2	GGGAGGRR_MAZ_Q6
157807	CLVS1	clavesin 1		CAGGTG_E12_Q6	CTTTGT_LEF1_Q2		GGGTGGRR_PAX4_03	TTGTTT_FOXO4_01	TGGAAA_NFAT_Q4_01	AACTTT_UNKNOWN	CAGCTG_AP4_Q5
57561	ARRDC3	arrestin domain containing 3		CAGGTG_E12_Q6	CTTTGT_LEF1_Q2		GGGTGGRR_PAX4_03	TTGTTT_FOXO4_01	TGGAAA_NFAT_Q4_01	AACTTT_UNKNOWN		CTGCAGY_UNKNOWN
9315	C5orf13	chromosome 5 open reading frame 13		CAGGTG_E12_Q6	CTTTGT_LEF1_Q2		GGGTGGRR_PAX4_03	TTGTTT_FOXO4_01	TGGAAA_NFAT_Q4_01
23199	KIAA0182	KIAA0182		CAGGTG_E12_Q6	CTTTGT_LEF1_Q2		GGGTGGRR_PAX4_03	TTGTTT_FOXO4_01
56896	DPYSL5	dihydropyrimidinase-like 5		CAGGTG_E12_Q6	CTTTGT_LEF1_Q2		GGGTGGRR_PAX4_03	TTGTTT_FOXO4_01
5569	PKIA	protein kinase (cAMP-dependent, catalytic) inhibitor alpha		CAGGTG_E12_Q6	CTTTGT_LEF1_Q2		GGGTGGRR_PAX4_03	TTGTTT_FOXO4_01
58528	RRAGD	Ras-related GTP binding D		CAGGTG_E12_Q6	CTTTGT_LEF1_Q2		GGGTGGRR_PAX4_03			AACTTT_UNKNOWN	CAGCTG_AP4_Q5
287	ANK2	ankyrin 2, neuronal		CAGGTG_E12_Q6	CTTTGT_LEF1_Q2		GGGTGGRR_PAX4_03				CAGCTG_AP4_Q5
7483	WNT9A	wingless-type MMTV integration site family, member 9A		CAGGTG_E12_Q6	CTTTGT_LEF1_Q2		GGGTGGRR_PAX4_03				CAGCTG_AP4_Q5
3797	KIF3C	kinesin family member 3C		CAGGTG_E12_Q6	CTTTGT_LEF1_Q2		GGGTGGRR_PAX4_03					CTGCAGY_UNKNOWN
22911	WDR47	WD repeat domain 47		CAGGTG_E12_Q6	CTTTGT_LEF1_Q2		GGGTGGRR_PAX4_03
10804	GJB6	gap junction protein, beta 6, 30kDa		CAGGTG_E12_Q6	CTTTGT_LEF1_Q2		GGGTGGRR_PAX4_03
56675	NRIP3	nuclear receptor interacting protein 3		CAGGTG_E12_Q6	CTTTGT_LEF1_Q2		GGGTGGRR_PAX4_03
4929	NR4A2	nuclear receptor subfamily 4, group A, member 2		CAGGTG_E12_Q6	CTTTGT_LEF1_Q2			TTGTTT_FOXO4_01	TGGAAA_NFAT_Q4_01	AACTTT_UNKNOWN
10371	SEMA3A	sema domain, immunoglobulin domain (Ig), short basic domain, secreted, (semaphorin) 3A		CAGGTG_E12_Q6	CTTTGT_LEF1_Q2			TTGTTT_FOXO4_01	TGGAAA_NFAT_Q4_01	AACTTT_UNKNOWN
5156	PDGFRA	platelet-derived growth factor receptor, alpha polypeptide		CAGGTG_E12_Q6	CTTTGT_LEF1_Q2			TTGTTT_FOXO4_01	TGGAAA_NFAT_Q4_01
5295	PIK3R1	phosphoinositide-3-kinase, regulatory subunit 1 (alpha)		CAGGTG_E12_Q6	CTTTGT_LEF1_Q2			TTGTTT_FOXO4_01		AACTTT_UNKNOWN		CTGCAGY_UNKNOWN
23433	RHOQ	ras homolog gene family, member Q		CAGGTG_E12_Q6	CTTTGT_LEF1_Q2			TTGTTT_FOXO4_01		AACTTT_UNKNOWN
3910	LAMA4	laminin, alpha 4		CAGGTG_E12_Q6	CTTTGT_LEF1_Q2			TTGTTT_FOXO4_01		AACTTT_UNKNOWN
869	CBLN1	cerebellin 1 precursor		CAGGTG_E12_Q6	CTTTGT_LEF1_Q2			TTGTTT_FOXO4_01				CTGCAGY_UNKNOWN
57486	NLN	neurolysin (metallopeptidase M3 family)		CAGGTG_E12_Q6	CTTTGT_LEF1_Q2			TTGTTT_FOXO4_01
153020	RASGEF1B	RasGEF domain family, member 1B		CAGGTG_E12_Q6	CTTTGT_LEF1_Q2			TTGTTT_FOXO4_01
10865	ARID5A	AT rich interactive domain 5A (MRF1-like)		CAGGTG_E12_Q6	CTTTGT_LEF1_Q2			TTGTTT_FOXO4_01
8631	SKAP1	src kinase associated phosphoprotein 1		CAGGTG_E12_Q6	CTTTGT_LEF1_Q2			TTGTTT_FOXO4_01
5293	PIK3CD	phosphoinositide-3-kinase, catalytic, delta polypeptide		CAGGTG_E12_Q6	CTTTGT_LEF1_Q2			TTGTTT_FOXO4_01
25978	CHMP2B	charged multivesicular body protein 2B		CAGGTG_E12_Q6	CTTTGT_LEF1_Q2			TTGTTT_FOXO4_01
144348	ZNF664	zinc finger protein 664		CAGGTG_E12_Q6	CTTTGT_LEF1_Q2			TTGTTT_FOXO4_01
83872	HMCN1	hemicentin 1		CAGGTG_E12_Q6	CTTTGT_LEF1_Q2			TTGTTT_FOXO4_01
57715	SEMA4G	sema domain, immunoglobulin domain (Ig), transmembrane domain (TM) and short cytoplasmic domain, (semaphorin) 4G		CAGGTG_E12_Q6	CTTTGT_LEF1_Q2			TTGTTT_FOXO4_01
220441	RNF152	ring finger protein 152		CAGGTG_E12_Q6	CTTTGT_LEF1_Q2				TGGAAA_NFAT_Q4_01	AACTTT_UNKNOWN		CTGCAGY_UNKNOWN
1734	DIO2	deiodinase, iodothyronine, type II		CAGGTG_E12_Q6	CTTTGT_LEF1_Q2				TGGAAA_NFAT_Q4_01			CTGCAGY_UNKNOWN
1809	DPYSL3	dihydropyrimidinase-like 3		CAGGTG_E12_Q6	CTTTGT_LEF1_Q2					AACTTT_UNKNOWN		CTGCAGY_UNKNOWN
9886	RHOBTB1	Rho-related BTB domain containing 1		CAGGTG_E12_Q6	CTTTGT_LEF1_Q2					AACTTT_UNKNOWN
84966	IGSF21	immunoglobin superfamily, member 21		CAGGTG_E12_Q6	CTTTGT_LEF1_Q2					AACTTT_UNKNOWN
23231	SEL1L3	sel-1 suppressor of lin-12-like 3 (C. elegans)		CAGGTG_E12_Q6	CTTTGT_LEF1_Q2					AACTTT_UNKNOWN
5173	PDYN	prodynorphin		CAGGTG_E12_Q6	CTTTGT_LEF1_Q2					AACTTT_UNKNOWN
4217	MAP3K5	mitogen-activated protein kinase kinase kinase 5		CAGGTG_E12_Q6	CTTTGT_LEF1_Q2						CAGCTG_AP4_Q5
169044	COL22A1	collagen, type XXII, alpha 1		CAGGTG_E12_Q6	CTTTGT_LEF1_Q2						CAGCTG_AP4_Q5
56987	BBX	bobby sox homolog (Drosophila)		CAGGTG_E12_Q6	CTTTGT_LEF1_Q2							CTGCAGY_UNKNOWN
9823	ARMCX2	armadillo repeat containing, X-linked 2		CAGGTG_E12_Q6	CTTTGT_LEF1_Q2
10067	SCAMP3	secretory carrier membrane protein 3		CAGGTG_E12_Q6	CTTTGT_LEF1_Q2
5880	RAC2	ras-related C3 botulinum toxin substrate 2 (rho family, small GTP binding protein Rac2)		CAGGTG_E12_Q6	CTTTGT_LEF1_Q2
1612	DAPK1	death-associated protein kinase 1		CAGGTG_E12_Q6	CTTTGT_LEF1_Q2
51201	ZDHHC2	zinc finger, DHHC-type containing 2		CAGGTG_E12_Q6	CTTTGT_LEF1_Q2
1500	CTNND1	catenin (cadherin-associated protein), delta 1		CAGGTG_E12_Q6		GGGAGGRR_MAZ_Q6	GGGTGGRR_PAX4_03	TTGTTT_FOXO4_01	TGGAAA_NFAT_Q4_01	AACTTT_UNKNOWN		CTGCAGY_UNKNOWN
3985	LIMK2	LIM domain kinase 2		CAGGTG_E12_Q6		GGGAGGRR_MAZ_Q6	GGGTGGRR_PAX4_03	TTGTTT_FOXO4_01	TGGAAA_NFAT_Q4_01		CAGCTG_AP4_Q5	CTGCAGY_UNKNOWN
2775	GNAO1	guanine nucleotide binding protein (G protein), alpha activating activity polypeptide O		CAGGTG_E12_Q6		GGGAGGRR_MAZ_Q6	GGGTGGRR_PAX4_03	TTGTTT_FOXO4_01	TGGAAA_NFAT_Q4_01
2596	GAP43	growth associated protein 43		CAGGTG_E12_Q6		GGGAGGRR_MAZ_Q6	GGGTGGRR_PAX4_03		TGGAAA_NFAT_Q4_01		CAGCTG_AP4_Q5
100131755	ARMCX4	armadillo repeat containing, X-linked 4		CAGGTG_E12_Q6		GGGAGGRR_MAZ_Q6	GGGTGGRR_PAX4_03		TGGAAA_NFAT_Q4_01			CTGCAGY_UNKNOWN
64856	VWA1	von Willebrand factor A domain containing 1		CAGGTG_E12_Q6		GGGAGGRR_MAZ_Q6	GGGTGGRR_PAX4_03		TGGAAA_NFAT_Q4_01
576	BAI2	brain-specific angiogenesis inhibitor 2		CAGGTG_E12_Q6		GGGAGGRR_MAZ_Q6	GGGTGGRR_PAX4_03			AACTTT_UNKNOWN		CTGCAGY_UNKNOWN
6935	ZEB1	zinc finger E-box binding homeobox 1		CAGGTG_E12_Q6		GGGAGGRR_MAZ_Q6	GGGTGGRR_PAX4_03			AACTTT_UNKNOWN
83607	AMMECR1L	AMME chromosomal region gene 1-like		CAGGTG_E12_Q6		GGGAGGRR_MAZ_Q6	GGGTGGRR_PAX4_03			AACTTT_UNKNOWN
58499	ZNF462	zinc finger protein 462		CAGGTG_E12_Q6		GGGAGGRR_MAZ_Q6	GGGTGGRR_PAX4_03			AACTTT_UNKNOWN
81848	SPRY4	sprouty homolog 4 (Drosophila)		CAGGTG_E12_Q6		GGGAGGRR_MAZ_Q6	GGGTGGRR_PAX4_03				CAGCTG_AP4_Q5	CTGCAGY_UNKNOWN
55800	SCN3B	sodium channel, voltage-gated, type III, beta		CAGGTG_E12_Q6		GGGAGGRR_MAZ_Q6	GGGTGGRR_PAX4_03				CAGCTG_AP4_Q5
1302	COL11A2	collagen, type XI, alpha 2		CAGGTG_E12_Q6		GGGAGGRR_MAZ_Q6	GGGTGGRR_PAX4_03					CTGCAGY_UNKNOWN
5630	PRPH	peripherin		CAGGTG_E12_Q6		GGGAGGRR_MAZ_Q6	GGGTGGRR_PAX4_03
55565	ZNF821	zinc finger protein 821		CAGGTG_E12_Q6		GGGAGGRR_MAZ_Q6	GGGTGGRR_PAX4_03
9120	SLC16A6	solute carrier family 16, member 6 (monocarboxylic acid transporter 7)		CAGGTG_E12_Q6		GGGAGGRR_MAZ_Q6		TTGTTT_FOXO4_01	TGGAAA_NFAT_Q4_01	AACTTT_UNKNOWN
2778	GNAS	GNAS complex locus		CAGGTG_E12_Q6		GGGAGGRR_MAZ_Q6		TTGTTT_FOXO4_01	TGGAAA_NFAT_Q4_01	AACTTT_UNKNOWN
79145	CHCHD7	coiled-coil-helix-coiled-coil-helix domain containing 7		CAGGTG_E12_Q6		GGGAGGRR_MAZ_Q6		TTGTTT_FOXO4_01	TGGAAA_NFAT_Q4_01	AACTTT_UNKNOWN
5063	PAK3	p21 protein (Cdc42/Rac)-activated kinase 3		CAGGTG_E12_Q6		GGGAGGRR_MAZ_Q6		TTGTTT_FOXO4_01	TGGAAA_NFAT_Q4_01		CAGCTG_AP4_Q5
57084	SLC17A6	solute carrier family 17 (sodium-dependent inorganic phosphate cotransporter), member 6		CAGGTG_E12_Q6		GGGAGGRR_MAZ_Q6		TTGTTT_FOXO4_01	TGGAAA_NFAT_Q4_01
83698	CALN1	calneuron 1		CAGGTG_E12_Q6		GGGAGGRR_MAZ_Q6		TTGTTT_FOXO4_01		AACTTT_UNKNOWN		CTGCAGY_UNKNOWN
1969	EPHA2	EPH receptor A2		CAGGTG_E12_Q6		GGGAGGRR_MAZ_Q6		TTGTTT_FOXO4_01			CAGCTG_AP4_Q5
5188	PET112	PET112 homolog (yeast)		CAGGTG_E12_Q6		GGGAGGRR_MAZ_Q6		TTGTTT_FOXO4_01
357	SHROOM2	shroom family member 2		CAGGTG_E12_Q6		GGGAGGRR_MAZ_Q6		TTGTTT_FOXO4_01
714	C1QC	complement component 1, q subcomponent, C chain		CAGGTG_E12_Q6		GGGAGGRR_MAZ_Q6		TTGTTT_FOXO4_01
158866	ZDHHC15	zinc finger, DHHC-type containing 15		CAGGTG_E12_Q6		GGGAGGRR_MAZ_Q6		TTGTTT_FOXO4_01
261734	NPHP4	nephronophthisis 4		CAGGTG_E12_Q6		GGGAGGRR_MAZ_Q6			TGGAAA_NFAT_Q4_01	AACTTT_UNKNOWN	CAGCTG_AP4_Q5
818	CAMK2G	calcium/calmodulin-dependent protein kinase II gamma		CAGGTG_E12_Q6		GGGAGGRR_MAZ_Q6			TGGAAA_NFAT_Q4_01		CAGCTG_AP4_Q5	CTGCAGY_UNKNOWN
152789	JAKMIP1	janus kinase and microtubule interacting protein 1		CAGGTG_E12_Q6		GGGAGGRR_MAZ_Q6			TGGAAA_NFAT_Q4_01			CTGCAGY_UNKNOWN
1025	CDK9	cyclin-dependent kinase 9		CAGGTG_E12_Q6		GGGAGGRR_MAZ_Q6			TGGAAA_NFAT_Q4_01			CTGCAGY_UNKNOWN
6337	SCNN1A	sodium channel, nonvoltage-gated 1 alpha		CAGGTG_E12_Q6		GGGAGGRR_MAZ_Q6			TGGAAA_NFAT_Q4_01
27112	FAM155B	family with sequence similarity 155, member B		CAGGTG_E12_Q6		GGGAGGRR_MAZ_Q6			TGGAAA_NFAT_Q4_01
2556	GABRA3	gamma-aminobutyric acid (GABA) A receptor, alpha 3		CAGGTG_E12_Q6		GGGAGGRR_MAZ_Q6				AACTTT_UNKNOWN	CAGCTG_AP4_Q5	CTGCAGY_UNKNOWN
221895	JAZF1	JAZF zinc finger 1		CAGGTG_E12_Q6		GGGAGGRR_MAZ_Q6				AACTTT_UNKNOWN
6788	STK3	serine/threonine kinase 3		CAGGTG_E12_Q6		GGGAGGRR_MAZ_Q6				AACTTT_UNKNOWN
23152	CIC	capicua homolog (Drosophila)		CAGGTG_E12_Q6		GGGAGGRR_MAZ_Q6				AACTTT_UNKNOWN
6820	SULT2B1	sulfotransferase family, cytosolic, 2B, member 1		CAGGTG_E12_Q6		GGGAGGRR_MAZ_Q6					CAGCTG_AP4_Q5
445	ASS1	argininosuccinate synthase 1		CAGGTG_E12_Q6		GGGAGGRR_MAZ_Q6					CAGCTG_AP4_Q5
57626	KLHL1	kelch-like 1 (Drosophila)		CAGGTG_E12_Q6		GGGAGGRR_MAZ_Q6					CAGCTG_AP4_Q5
84265	POLR3GL	polymerase (RNA) III (DNA directed) polypeptide G (32kD)-like		CAGGTG_E12_Q6		GGGAGGRR_MAZ_Q6					CAGCTG_AP4_Q5
340348	TSPAN33	tetraspanin 33		CAGGTG_E12_Q6		GGGAGGRR_MAZ_Q6					CAGCTG_AP4_Q5
84937	ZNRF1	zinc and ring finger 1		CAGGTG_E12_Q6		GGGAGGRR_MAZ_Q6						CTGCAGY_UNKNOWN
226	ALDOA	aldolase A, fructose-bisphosphate		CAGGTG_E12_Q6		GGGAGGRR_MAZ_Q6
29903	CCDC106	coiled-coil domain containing 106		CAGGTG_E12_Q6		GGGAGGRR_MAZ_Q6
53834	FGFRL1	fibroblast growth factor receptor-like 1		CAGGTG_E12_Q6		GGGAGGRR_MAZ_Q6
23125	CAMTA2	calmodulin binding transcription activator 2		CAGGTG_E12_Q6		GGGAGGRR_MAZ_Q6
27092	CACNG4	calcium channel, voltage-dependent, gamma subunit 4		CAGGTG_E12_Q6		GGGAGGRR_MAZ_Q6
4324	MMP15	matrix metallopeptidase 15 (membrane-inserted)		CAGGTG_E12_Q6		GGGAGGRR_MAZ_Q6
10712	FAM189B	family with sequence similarity 189, member B		CAGGTG_E12_Q6		GGGAGGRR_MAZ_Q6
170689	ADAMTS15	ADAM metallopeptidase with thrombospondin type 1 motif, 15		CAGGTG_E12_Q6		GGGAGGRR_MAZ_Q6
2224	FDPS	farnesyl diphosphate synthase		CAGGTG_E12_Q6		GGGAGGRR_MAZ_Q6
23373	CRTC1	CREB regulated transcription coactivator 1		CAGGTG_E12_Q6		GGGAGGRR_MAZ_Q6
64772	ENGASE	endo-beta-N-acetylglucosaminidase		CAGGTG_E12_Q6		GGGAGGRR_MAZ_Q6
63971	KIF13A	kinesin family member 13A		CAGGTG_E12_Q6		GGGAGGRR_MAZ_Q6
84230	LRRC8C	leucine rich repeat containing 8 family, member C		CAGGTG_E12_Q6		GGGAGGRR_MAZ_Q6
79147	FKRP	fukutin related protein		CAGGTG_E12_Q6		GGGAGGRR_MAZ_Q6
712	C1QA	complement component 1, q subcomponent, A chain		CAGGTG_E12_Q6		GGGAGGRR_MAZ_Q6
139728	PNCK	pregnancy up-regulated non-ubiquitously expressed CaM kinase		CAGGTG_E12_Q6		GGGAGGRR_MAZ_Q6
2767	GNA11	guanine nucleotide binding protein (G protein), alpha 11 (Gq class)		CAGGTG_E12_Q6		GGGAGGRR_MAZ_Q6
3761	KCNJ4	potassium inwardly-rectifying channel, subfamily J, member 4		CAGGTG_E12_Q6		GGGAGGRR_MAZ_Q6
92154	MTSS1L	metastasis suppressor 1-like		CAGGTG_E12_Q6		GGGAGGRR_MAZ_Q6
133690	CAPSL	calcyphosine-like		CAGGTG_E12_Q6		GGGAGGRR_MAZ_Q6
11043	MID2	midline 2		CAGGTG_E12_Q6			GGGTGGRR_PAX4_03	TTGTTT_FOXO4_01	TGGAAA_NFAT_Q4_01	AACTTT_UNKNOWN	CAGCTG_AP4_Q5
320	APBA1	amyloid beta (A4) precursor protein-binding, family A, member 1		CAGGTG_E12_Q6			GGGTGGRR_PAX4_03	TTGTTT_FOXO4_01	TGGAAA_NFAT_Q4_01	AACTTT_UNKNOWN	CAGCTG_AP4_Q5
8554	PIAS1	protein inhibitor of activated STAT, 1		CAGGTG_E12_Q6			GGGTGGRR_PAX4_03	TTGTTT_FOXO4_01		AACTTT_UNKNOWN
151835	CPNE9	copine family member IX		CAGGTG_E12_Q6			GGGTGGRR_PAX4_03	TTGTTT_FOXO4_01		AACTTT_UNKNOWN
55691	FRMD4A	FERM domain containing 4A		CAGGTG_E12_Q6			GGGTGGRR_PAX4_03	TTGTTT_FOXO4_01				CTGCAGY_UNKNOWN
57326	PBXIP1	pre-B-cell leukemia homeobox interacting protein 1		CAGGTG_E12_Q6			GGGTGGRR_PAX4_03		TGGAAA_NFAT_Q4_01	AACTTT_UNKNOWN	CAGCTG_AP4_Q5
5376	PMP22	peripheral myelin protein 22		CAGGTG_E12_Q6			GGGTGGRR_PAX4_03		TGGAAA_NFAT_Q4_01		CAGCTG_AP4_Q5
3488	IGFBP5	insulin-like growth factor binding protein 5		CAGGTG_E12_Q6			GGGTGGRR_PAX4_03		TGGAAA_NFAT_Q4_01
54414	SIAE	sialic acid acetylesterase		CAGGTG_E12_Q6			GGGTGGRR_PAX4_03		TGGAAA_NFAT_Q4_01
6753	SSTR3	somatostatin receptor 3		CAGGTG_E12_Q6			GGGTGGRR_PAX4_03			AACTTT_UNKNOWN
3659	IRF1	interferon regulatory factor 1		CAGGTG_E12_Q6			GGGTGGRR_PAX4_03			AACTTT_UNKNOWN
3782	KCNN3	potassium intermediate/small conductance calcium-activated channel, subfamily N, member 3		CAGGTG_E12_Q6			GGGTGGRR_PAX4_03				CAGCTG_AP4_Q5	CTGCAGY_UNKNOWN
2039	EPB49	erythrocyte membrane protein band 4.9 (dematin)		CAGGTG_E12_Q6			GGGTGGRR_PAX4_03					CTGCAGY_UNKNOWN
5935	RBM3	RNA binding motif (RNP1, RRM) protein 3		CAGGTG_E12_Q6			GGGTGGRR_PAX4_03
2185	PTK2B	PTK2B protein tyrosine kinase 2 beta		CAGGTG_E12_Q6			GGGTGGRR_PAX4_03
5034	P4HB	prolyl 4-hydroxylase, beta polypeptide		CAGGTG_E12_Q6			GGGTGGRR_PAX4_03
257194	NEGR1	neuronal growth regulator 1		CAGGTG_E12_Q6			GGGTGGRR_PAX4_03
1839	HBEGF	heparin-binding EGF-like growth factor		CAGGTG_E12_Q6			GGGTGGRR_PAX4_03
170463	SSBP4	single stranded DNA binding protein 4		CAGGTG_E12_Q6			GGGTGGRR_PAX4_03
6422	SFRP1	secreted frizzled-related protein 1		CAGGTG_E12_Q6			GGGTGGRR_PAX4_03
55203	LGI2	leucine-rich repeat LGI family, member 2		CAGGTG_E12_Q6			GGGTGGRR_PAX4_03
4856	NOV	nephroblastoma overexpressed gene		CAGGTG_E12_Q6			GGGTGGRR_PAX4_03
5933	RBL1	retinoblastoma-like 1 (p107)		CAGGTG_E12_Q6			GGGTGGRR_PAX4_03
146330	FBXL16	F-box and leucine-rich repeat protein 16		CAGGTG_E12_Q6			GGGTGGRR_PAX4_03
51617	HMP19	HMP19 protein		CAGGTG_E12_Q6				TTGTTT_FOXO4_01	TGGAAA_NFAT_Q4_01	AACTTT_UNKNOWN	CAGCTG_AP4_Q5
6239	RREB1	ras responsive element binding protein 1		CAGGTG_E12_Q6				TTGTTT_FOXO4_01	TGGAAA_NFAT_Q4_01	AACTTT_UNKNOWN
51422	PRKAG2	protein kinase, AMP-activated, gamma 2 non-catalytic subunit		CAGGTG_E12_Q6				TTGTTT_FOXO4_01	TGGAAA_NFAT_Q4_01	AACTTT_UNKNOWN
1295	COL8A1	collagen, type VIII, alpha 1		CAGGTG_E12_Q6				TTGTTT_FOXO4_01	TGGAAA_NFAT_Q4_01
2182	ACSL4	acyl-CoA synthetase long-chain family member 4		CAGGTG_E12_Q6				TTGTTT_FOXO4_01		AACTTT_UNKNOWN	CAGCTG_AP4_Q5
3691	ITGB4	integrin, beta 4		CAGGTG_E12_Q6				TTGTTT_FOXO4_01		AACTTT_UNKNOWN
6014	RIT2	Ras-like without CAAX 2		CAGGTG_E12_Q6				TTGTTT_FOXO4_01		AACTTT_UNKNOWN
3359	HTR3A	5-hydroxytryptamine (serotonin) receptor 3A		CAGGTG_E12_Q6				TTGTTT_FOXO4_01			CAGCTG_AP4_Q5
257068	PLCXD2	phosphatidylinositol-specific phospholipase C, X domain containing 2		CAGGTG_E12_Q6				TTGTTT_FOXO4_01
22926	ATF6	activating transcription factor 6		CAGGTG_E12_Q6				TTGTTT_FOXO4_01
114907	FBXO32	F-box protein 32		CAGGTG_E12_Q6				TTGTTT_FOXO4_01
9376	SLC22A8	solute carrier family 22 (organic anion transporter), member 8		CAGGTG_E12_Q6				TTGTTT_FOXO4_01
2009	EML1	echinoderm microtubule associated protein like 1		CAGGTG_E12_Q6				TTGTTT_FOXO4_01
23576	DDAH1	dimethylarginine dimethylaminohydrolase 1		CAGGTG_E12_Q6				TTGTTT_FOXO4_01
4162	MCAM	melanoma cell adhesion molecule		CAGGTG_E12_Q6					TGGAAA_NFAT_Q4_01		CAGCTG_AP4_Q5	CTGCAGY_UNKNOWN
9610	RIN1	Ras and Rab interactor 1		CAGGTG_E12_Q6					TGGAAA_NFAT_Q4_01		CAGCTG_AP4_Q5
5924	RASGRF2	Ras protein-specific guanine nucleotide-releasing factor 2		CAGGTG_E12_Q6					TGGAAA_NFAT_Q4_01		CAGCTG_AP4_Q5
753	C18orf1	chromosome 18 open reading frame 1		CAGGTG_E12_Q6					TGGAAA_NFAT_Q4_01		CAGCTG_AP4_Q5
3679	ITGA7	integrin, alpha 7		CAGGTG_E12_Q6					TGGAAA_NFAT_Q4_01			CTGCAGY_UNKNOWN
11034	DSTN	destrin (actin depolymerizing factor)		CAGGTG_E12_Q6					TGGAAA_NFAT_Q4_01			CTGCAGY_UNKNOWN
2918	GRM8	glutamate receptor, metabotropic 8		CAGGTG_E12_Q6					TGGAAA_NFAT_Q4_01
93663	ARHGAP18	Rho GTPase activating protein 18		CAGGTG_E12_Q6					TGGAAA_NFAT_Q4_01
23037	PDZD2	PDZ domain containing 2		CAGGTG_E12_Q6					TGGAAA_NFAT_Q4_01
4591	TRIM37	tripartite motif containing 37		CAGGTG_E12_Q6					TGGAAA_NFAT_Q4_01
29803	REPIN1	replication initiator 1		CAGGTG_E12_Q6					TGGAAA_NFAT_Q4_01
4005	LMO2	LIM domain only 2 (rhombotin-like 1)		CAGGTG_E12_Q6					TGGAAA_NFAT_Q4_01
1384	CRAT	carnitine O-acetyltransferase		CAGGTG_E12_Q6					TGGAAA_NFAT_Q4_01
9334	B4GALT5	UDP-Gal:betaGlcNAc beta 1,4- galactosyltransferase, polypeptide 5		CAGGTG_E12_Q6					TGGAAA_NFAT_Q4_01
5129	CDK18	cyclin-dependent kinase 18		CAGGTG_E12_Q6						AACTTT_UNKNOWN	CAGCTG_AP4_Q5
8912	CACNA1H	calcium channel, voltage-dependent, T type, alpha 1H subunit		CAGGTG_E12_Q6						AACTTT_UNKNOWN	CAGCTG_AP4_Q5
57118	CAMK1D	calcium/calmodulin-dependent protein kinase ID		CAGGTG_E12_Q6						AACTTT_UNKNOWN		CTGCAGY_UNKNOWN
5796	PTPRK	protein tyrosine phosphatase, receptor type, K		CAGGTG_E12_Q6						AACTTT_UNKNOWN
79577	CDC73	cell division cycle 73, Paf1/RNA polymerase II complex component, homolog (S. cerevisiae)		CAGGTG_E12_Q6						AACTTT_UNKNOWN
55857	PLK1S1	polo-like kinase 1 substrate 1		CAGGTG_E12_Q6						AACTTT_UNKNOWN
57522	SRGAP1	SLIT-ROBO Rho GTPase activating protein 1		CAGGTG_E12_Q6						AACTTT_UNKNOWN
116984	ARAP2	ArfGAP with RhoGAP domain, ankyrin repeat and PH domain 2		CAGGTG_E12_Q6						AACTTT_UNKNOWN
343990	C2orf55	chromosome 2 open reading frame 55		CAGGTG_E12_Q6						AACTTT_UNKNOWN
9397	NMT2	N-myristoyltransferase 2		CAGGTG_E12_Q6						AACTTT_UNKNOWN
23671	TMEFF2	transmembrane protein with EGF-like and two follistatin-like domains 2		CAGGTG_E12_Q6						AACTTT_UNKNOWN
147	ADRA1B	adrenergic, alpha-1B-, receptor		CAGGTG_E12_Q6						AACTTT_UNKNOWN
5905	RANGAP1	Ran GTPase activating protein 1		CAGGTG_E12_Q6						AACTTT_UNKNOWN
157378	TMEM65	transmembrane protein 65		CAGGTG_E12_Q6						AACTTT_UNKNOWN
8448	DOC2A	double C2-like domains, alpha		CAGGTG_E12_Q6							CAGCTG_AP4_Q5	CTGCAGY_UNKNOWN
90668	LRRC16B	leucine rich repeat containing 16B		CAGGTG_E12_Q6							CAGCTG_AP4_Q5	CTGCAGY_UNKNOWN
65012	SLC26A10	solute carrier family 26, member 10		CAGGTG_E12_Q6							CAGCTG_AP4_Q5	CTGCAGY_UNKNOWN
134548	ANKRD43	ankyrin repeat domain 43		CAGGTG_E12_Q6							CAGCTG_AP4_Q5
1821	DRP2	dystrophin related protein 2		CAGGTG_E12_Q6							CAGCTG_AP4_Q5
11095	ADAMTS8	ADAM metallopeptidase with thrombospondin type 1 motif, 8		CAGGTG_E12_Q6							CAGCTG_AP4_Q5
4703	NEB	nebulin		CAGGTG_E12_Q6							CAGCTG_AP4_Q5
25940	FAM98A	family with sequence similarity 98, member A		CAGGTG_E12_Q6							CAGCTG_AP4_Q5
1134	CHRNA1	cholinergic receptor, nicotinic, alpha 1 (muscle)		CAGGTG_E12_Q6							CAGCTG_AP4_Q5
9628	RGS6	regulator of G-protein signaling 6		CAGGTG_E12_Q6							CAGCTG_AP4_Q5
7480	WNT10B	wingless-type MMTV integration site family, member 10B		CAGGTG_E12_Q6							CAGCTG_AP4_Q5
25837	RAB26	RAB26, member RAS oncogene family		CAGGTG_E12_Q6							CAGCTG_AP4_Q5
2081	ERN1	endoplasmic reticulum to nucleus signaling 1		CAGGTG_E12_Q6							CAGCTG_AP4_Q5
80233	C17orf70	chromosome 17 open reading frame 70		CAGGTG_E12_Q6							CAGCTG_AP4_Q5
2322	FLT3	fms-related tyrosine kinase 3		CAGGTG_E12_Q6								CTGCAGY_UNKNOWN
2170	FABP3	fatty acid binding protein 3, muscle and heart (mammary-derived growth inhibitor)		CAGGTG_E12_Q6
7037	TFRC	transferrin receptor (p90, CD71)		CAGGTG_E12_Q6
9143	SYNGR3	synaptogyrin 3		CAGGTG_E12_Q6
2803	GOLGA4	golgin A4		CAGGTG_E12_Q6
55735	DNAJC11	DnaJ (Hsp40) homolog, subfamily C, member 11		CAGGTG_E12_Q6
5218	CDK14	cyclin-dependent kinase 14		CAGGTG_E12_Q6
80335	WDR82	WD repeat domain 82		CAGGTG_E12_Q6
3177	SLC29A2	solute carrier family 29 (nucleoside transporters), member 2		CAGGTG_E12_Q6
51309	ARMCX1	armadillo repeat containing, X-linked 1		CAGGTG_E12_Q6
93145	OLFM2	olfactomedin 2		CAGGTG_E12_Q6
84504	NKX6-2	NK6 homeobox 2		CAGGTG_E12_Q6
23242	COBL	cordon-bleu homolog (mouse)		CAGGTG_E12_Q6
10653	SPINT2	serine peptidase inhibitor, Kunitz type, 2		CAGGTG_E12_Q6
79847	TMEM180	transmembrane protein 180		CAGGTG_E12_Q6
59084	ENPP5	ectonucleotide pyrophosphatase/phosphodiesterase 5 (putative)		CAGGTG_E12_Q6
81621	KAZALD1	Kazal-type serine peptidase inhibitor domain 1		CAGGTG_E12_Q6
221785	ZNF498	zinc finger protein 498		CAGGTG_E12_Q6
161436	EML5	echinoderm microtubule associated protein like 5		CAGGTG_E12_Q6
6713	SQLE	squalene epoxidase		CAGGTG_E12_Q6
9896	FIG4	FIG4 homolog, SAC1 lipid phosphatase domain containing (S. cerevisiae)		CAGGTG_E12_Q6
2982	GUCY1A3	guanylate cyclase 1, soluble, alpha 3		CAGGTG_E12_Q6
353189	SLCO4C1	solute carrier organic anion transporter family, member 4C1		CAGGTG_E12_Q6
3936	LCP1	lymphocyte cytosolic protein 1 (L-plastin)		CAGGTG_E12_Q6
22901	ARSG	arylsulfatase G		CAGGTG_E12_Q6
27166	PRELID1	PRELI domain containing 1		CAGGTG_E12_Q6
2074	ERCC6	excision repair cross-complementing rodent repair deficiency, complementation group 6		CAGGTG_E12_Q6
4358	MPV17	MpV17 mitochondrial inner membrane protein		CAGGTG_E12_Q6
64089	SNX16	sorting nexin 16		CAGGTG_E12_Q6
4824	NKX3-1	NK3 homeobox 1		CAGGTG_E12_Q6
9381	OTOF	otoferlin		CAGGTG_E12_Q6
9168	TMSB10	thymosin beta 10		CAGGTG_E12_Q6
651	BMP3	bone morphogenetic protein 3		CAGGTG_E12_Q6
6732	SRPK1	SRSF protein kinase 1		CAGGTG_E12_Q6
51332	SPTBN5	spectrin, beta, non-erythrocytic 5		CAGGTG_E12_Q6
7321	UBE2D1	ubiquitin-conjugating enzyme E2D 1		CAGGTG_E12_Q6
29887	SNX10	sorting nexin 10		CAGGTG_E12_Q6
259230	SGMS1	sphingomyelin synthase 1		CAGGTG_E12_Q6
57657	HCN3	hyperpolarization activated cyclic nucleotide-gated potassium channel 3		CAGGTG_E12_Q6
79837	PIP4K2C	phosphatidylinositol-5-phosphate 4-kinase, type II, gamma		CAGGTG_E12_Q6
54961	SSH3	slingshot homolog 3 (Drosophila)		CAGGTG_E12_Q6
54903	MKS1	Meckel syndrome, type 1		CAGGTG_E12_Q6
2628	GATM	glycine amidinotransferase (L-arginine:glycine amidinotransferase)		CAGGTG_E12_Q6
3705	ITPK1	inositol-tetrakisphosphate 1-kinase		CAGGTG_E12_Q6
124923	SGK494	uncharacterized serine/threonine-protein kinase SgK494		CAGGTG_E12_Q6
10927	SPIN1	spindlin 1		CAGGTG_E12_Q6
64094	SMOC2	SPARC related modular calcium binding 2		CAGGTG_E12_Q6
255743	NPNT	nephronectin		CAGGTG_E12_Q6
84261	FBXW9	F-box and WD repeat domain containing 9		CAGGTG_E12_Q6
9491	PSMF1	proteasome (prosome, macropain) inhibitor subunit 1 (PI31)		CAGGTG_E12_Q6
7805	LAPTM5	lysosomal protein transmembrane 5		CAGGTG_E12_Q6
3739	KCNA4	potassium voltage-gated channel, shaker-related subfamily, member 4		CAGGTG_E12_Q6
1122	CHML	choroideremia-like (Rab escort protein 2)		CAGGTG_E12_Q6
55163	PNPO	pyridoxamine 5'-phosphate oxidase		CAGGTG_E12_Q6
6015	RING1	ring finger protein 1		CAGGTG_E12_Q6
51506	UFC1	ubiquitin-fold modifier conjugating enzyme 1		CAGGTG_E12_Q6
6611	SMS	spermine synthase		CAGGTG_E12_Q6
26984	SEC22A	SEC22 vesicle trafficking protein homolog A (S. cerevisiae)		CAGGTG_E12_Q6
23276	KLHL18	kelch-like 18 (Drosophila)		CAGGTG_E12_Q6
56474	CTPS2	CTP synthase II		CAGGTG_E12_Q6
81533	ITFG1	integrin alpha FG-GAP repeat containing 1		CAGGTG_E12_Q6
55577	NAGK	N-acetylglucosamine kinase		CAGGTG_E12_Q6
375616	KCP	kielin/chordin-like protein		CAGGTG_E12_Q6
83605	CCM2	cerebral cavernous malformation 2		CAGGTG_E12_Q6
8785	MATN4	matrilin 4		CAGGTG_E12_Q6
7464	CORO2A	coronin, actin binding protein, 2A		CAGGTG_E12_Q6
282974	STK32C	serine/threonine kinase 32C		CAGGTG_E12_Q6
4145	MATK	megakaryocyte-associated tyrosine kinase		CAGGTG_E12_Q6
130872	AHSA2	AHA1, activator of heat shock 90kDa protein ATPase homolog 2 (yeast)		CAGGTG_E12_Q6
54749	EPDR1	ependymin related protein 1 (zebrafish)		CAGGTG_E12_Q6
54511	HMGCLL1	3-hydroxymethyl-3-methylglutaryl-CoA lyase-like 1		CAGGTG_E12_Q6
6723	SRM	spermidine synthase		CAGGTG_E12_Q6
2519	FUCA2	fucosidase, alpha-L- 2, plasma		CAGGTG_E12_Q6
5091	PC	pyruvate carboxylase		CAGGTG_E12_Q6
55752	2011-09-01	septin 11		CAGGTG_E12_Q6
84649	DGAT2	diacylglycerol O-acyltransferase 2		CAGGTG_E12_Q6
10198	MPHOSPH9	M-phase phosphoprotein 9		CAGGTG_E12_Q6
148808	MFSD4	major facilitator superfamily domain containing 4		CAGGTG_E12_Q6
23225	NUP210	nucleoporin 210kDa		CAGGTG_E12_Q6
26018	LRIG1	leucine-rich repeats and immunoglobulin-like domains 1		CAGGTG_E12_Q6
4285	MIPEP	mitochondrial intermediate peptidase		CAGGTG_E12_Q6
83464	APH1B	anterior pharynx defective 1 homolog B (C. elegans)		CAGGTG_E12_Q6
11278	KLF12	Kruppel-like factor 12			CTTTGT_LEF1_Q2	GGGAGGRR_MAZ_Q6	GGGTGGRR_PAX4_03	TTGTTT_FOXO4_01	TGGAAA_NFAT_Q4_01	AACTTT_UNKNOWN	CAGCTG_AP4_Q5	CTGCAGY_UNKNOWN
26207	PITPNC1	phosphatidylinositol transfer protein, cytoplasmic 1			CTTTGT_LEF1_Q2	GGGAGGRR_MAZ_Q6	GGGTGGRR_PAX4_03	TTGTTT_FOXO4_01	TGGAAA_NFAT_Q4_01	AACTTT_UNKNOWN
9874	TLK1	tousled-like kinase 1			CTTTGT_LEF1_Q2	GGGAGGRR_MAZ_Q6	GGGTGGRR_PAX4_03	TTGTTT_FOXO4_01		AACTTT_UNKNOWN
3181	HNRNPA2B1	heterogeneous nuclear ribonucleoprotein A2/B1			CTTTGT_LEF1_Q2	GGGAGGRR_MAZ_Q6	GGGTGGRR_PAX4_03	TTGTTT_FOXO4_01
2892	GRIA3	glutamate receptor, ionotrophic, AMPA 3			CTTTGT_LEF1_Q2	GGGAGGRR_MAZ_Q6	GGGTGGRR_PAX4_03		TGGAAA_NFAT_Q4_01	AACTTT_UNKNOWN		CTGCAGY_UNKNOWN
5754	PTK7	PTK7 protein tyrosine kinase 7			CTTTGT_LEF1_Q2	GGGAGGRR_MAZ_Q6	GGGTGGRR_PAX4_03		TGGAAA_NFAT_Q4_01		CAGCTG_AP4_Q5
2906	GRIN2D	glutamate receptor, ionotropic, N-methyl D-aspartate 2D			CTTTGT_LEF1_Q2	GGGAGGRR_MAZ_Q6	GGGTGGRR_PAX4_03				CAGCTG_AP4_Q5	CTGCAGY_UNKNOWN
7029	TFDP2	transcription factor Dp-2 (E2F dimerization partner 2)			CTTTGT_LEF1_Q2	GGGAGGRR_MAZ_Q6		TTGTTT_FOXO4_01	TGGAAA_NFAT_Q4_01	AACTTT_UNKNOWN	CAGCTG_AP4_Q5	CTGCAGY_UNKNOWN
9480	ONECUT2	one cut homeobox 2			CTTTGT_LEF1_Q2	GGGAGGRR_MAZ_Q6		TTGTTT_FOXO4_01		AACTTT_UNKNOWN	CAGCTG_AP4_Q5
116135	LRRC3B	leucine rich repeat containing 3B			CTTTGT_LEF1_Q2	GGGAGGRR_MAZ_Q6		TTGTTT_FOXO4_01		AACTTT_UNKNOWN		CTGCAGY_UNKNOWN
9468	PCYT1B	phosphate cytidylyltransferase 1, choline, beta			CTTTGT_LEF1_Q2	GGGAGGRR_MAZ_Q6		TTGTTT_FOXO4_01			CAGCTG_AP4_Q5
27316	RBMX	RNA binding motif protein, X-linked			CTTTGT_LEF1_Q2	GGGAGGRR_MAZ_Q6			TGGAAA_NFAT_Q4_01	AACTTT_UNKNOWN
800	CALD1	caldesmon 1			CTTTGT_LEF1_Q2	GGGAGGRR_MAZ_Q6			TGGAAA_NFAT_Q4_01	AACTTT_UNKNOWN
6171	RPL41	ribosomal protein L41			CTTTGT_LEF1_Q2	GGGAGGRR_MAZ_Q6			TGGAAA_NFAT_Q4_01
53826	FXYD6	FXYD domain containing ion transport regulator 6			CTTTGT_LEF1_Q2	GGGAGGRR_MAZ_Q6			TGGAAA_NFAT_Q4_01
56062	KLHL4	kelch-like 4 (Drosophila)			CTTTGT_LEF1_Q2	GGGAGGRR_MAZ_Q6			TGGAAA_NFAT_Q4_01
220992	ZNF485	zinc finger protein 485			CTTTGT_LEF1_Q2	GGGAGGRR_MAZ_Q6			TGGAAA_NFAT_Q4_01
60	ACTB	actin, beta			CTTTGT_LEF1_Q2	GGGAGGRR_MAZ_Q6				AACTTT_UNKNOWN	CAGCTG_AP4_Q5
347733	TUBB2B	tubulin, beta 2B class IIb			CTTTGT_LEF1_Q2	GGGAGGRR_MAZ_Q6				AACTTT_UNKNOWN	CAGCTG_AP4_Q5
55321	C20orf46	chromosome 20 open reading frame 46			CTTTGT_LEF1_Q2	GGGAGGRR_MAZ_Q6				AACTTT_UNKNOWN		CTGCAGY_UNKNOWN
27328	PCDH11X	protocadherin 11 X-linked			CTTTGT_LEF1_Q2	GGGAGGRR_MAZ_Q6				AACTTT_UNKNOWN
10096	ACTR3	ARP3 actin-related protein 3 homolog (yeast)			CTTTGT_LEF1_Q2	GGGAGGRR_MAZ_Q6				AACTTT_UNKNOWN
309	ANXA6	annexin A6			CTTTGT_LEF1_Q2	GGGAGGRR_MAZ_Q6					CAGCTG_AP4_Q5	CTGCAGY_UNKNOWN
5745	PTH1R	parathyroid hormone 1 receptor			CTTTGT_LEF1_Q2	GGGAGGRR_MAZ_Q6					CAGCTG_AP4_Q5
10612	TRIM3	tripartite motif containing 3			CTTTGT_LEF1_Q2	GGGAGGRR_MAZ_Q6						CTGCAGY_UNKNOWN
10297	APC2	adenomatosis polyposis coli 2			CTTTGT_LEF1_Q2	GGGAGGRR_MAZ_Q6						CTGCAGY_UNKNOWN
284161	GDPD1	glycerophosphodiester phosphodiesterase domain containing 1			CTTTGT_LEF1_Q2	GGGAGGRR_MAZ_Q6
7536	SF1	splicing factor 1			CTTTGT_LEF1_Q2	GGGAGGRR_MAZ_Q6
4001	LMNB1	lamin B1			CTTTGT_LEF1_Q2	GGGAGGRR_MAZ_Q6
595	CCND1	cyclin D1			CTTTGT_LEF1_Q2	GGGAGGRR_MAZ_Q6
6319	SCD	stearoyl-CoA desaturase (delta-9-desaturase)			CTTTGT_LEF1_Q2	GGGAGGRR_MAZ_Q6
114990	VASN	vasorin			CTTTGT_LEF1_Q2	GGGAGGRR_MAZ_Q6
1301	COL11A1	collagen, type XI, alpha 1			CTTTGT_LEF1_Q2	GGGAGGRR_MAZ_Q6
665	BNIP3L	BCL2/adenovirus E1B 19kDa interacting protein 3-like			CTTTGT_LEF1_Q2	GGGAGGRR_MAZ_Q6
2585	GALK2	galactokinase 2			CTTTGT_LEF1_Q2	GGGAGGRR_MAZ_Q6
23168	RTF1	Rtf1, Paf1/RNA polymerase II complex component, homolog (S. cerevisiae)			CTTTGT_LEF1_Q2	GGGAGGRR_MAZ_Q6
8728	ADAM19	ADAM metallopeptidase domain 19			CTTTGT_LEF1_Q2	GGGAGGRR_MAZ_Q6
11279	KLF8	Kruppel-like factor 8			CTTTGT_LEF1_Q2		GGGTGGRR_PAX4_03	TTGTTT_FOXO4_01	TGGAAA_NFAT_Q4_01	AACTTT_UNKNOWN	CAGCTG_AP4_Q5
7224	TRPC5	transient receptor potential cation channel, subfamily C, member 5			CTTTGT_LEF1_Q2		GGGTGGRR_PAX4_03	TTGTTT_FOXO4_01		AACTTT_UNKNOWN
23462	HEY1	hairy/enhancer-of-split related with YRPW motif 1			CTTTGT_LEF1_Q2		GGGTGGRR_PAX4_03	TTGTTT_FOXO4_01				CTGCAGY_UNKNOWN
51274	KLF3	Kruppel-like factor 3 (basic)			CTTTGT_LEF1_Q2		GGGTGGRR_PAX4_03	TTGTTT_FOXO4_01
54329	GPR85	G protein-coupled receptor 85			CTTTGT_LEF1_Q2		GGGTGGRR_PAX4_03		TGGAAA_NFAT_Q4_01	AACTTT_UNKNOWN
51291	GMIP	GEM interacting protein			CTTTGT_LEF1_Q2		GGGTGGRR_PAX4_03		TGGAAA_NFAT_Q4_01
361	AQP4	aquaporin 4			CTTTGT_LEF1_Q2		GGGTGGRR_PAX4_03		TGGAAA_NFAT_Q4_01
27255	CNTN6	contactin 6			CTTTGT_LEF1_Q2		GGGTGGRR_PAX4_03			AACTTT_UNKNOWN	CAGCTG_AP4_Q5	CTGCAGY_UNKNOWN
7134	TNNC1	troponin C type 1 (slow)			CTTTGT_LEF1_Q2		GGGTGGRR_PAX4_03			AACTTT_UNKNOWN	CAGCTG_AP4_Q5
10160	FARP1	FERM, RhoGEF (ARHGEF) and pleckstrin domain protein 1 (chondrocyte-derived)			CTTTGT_LEF1_Q2		GGGTGGRR_PAX4_03			AACTTT_UNKNOWN		CTGCAGY_UNKNOWN
55122	AKIRIN2	akirin 2			CTTTGT_LEF1_Q2		GGGTGGRR_PAX4_03			AACTTT_UNKNOWN
283383	GPR133	G protein-coupled receptor 133			CTTTGT_LEF1_Q2		GGGTGGRR_PAX4_03			AACTTT_UNKNOWN
8405	SPOP	speckle-type POZ protein			CTTTGT_LEF1_Q2		GGGTGGRR_PAX4_03				CAGCTG_AP4_Q5
7046	TGFBR1	transforming growth factor, beta receptor 1			CTTTGT_LEF1_Q2		GGGTGGRR_PAX4_03
6016	RIT1	Ras-like without CAAX 1			CTTTGT_LEF1_Q2			TTGTTT_FOXO4_01	TGGAAA_NFAT_Q4_01	AACTTT_UNKNOWN	CAGCTG_AP4_Q5
80031	SEMA6D	sema domain, transmembrane domain (TM), and cytoplasmic domain, (semaphorin) 6D			CTTTGT_LEF1_Q2			TTGTTT_FOXO4_01	TGGAAA_NFAT_Q4_01	AACTTT_UNKNOWN	CAGCTG_AP4_Q5
5144	PDE4D	phosphodiesterase 4D, cAMP-specific			CTTTGT_LEF1_Q2			TTGTTT_FOXO4_01	TGGAAA_NFAT_Q4_01	AACTTT_UNKNOWN		CTGCAGY_UNKNOWN
9079	LDB2	LIM domain binding 2			CTTTGT_LEF1_Q2			TTGTTT_FOXO4_01	TGGAAA_NFAT_Q4_01	AACTTT_UNKNOWN
151887	CCDC80	coiled-coil domain containing 80			CTTTGT_LEF1_Q2			TTGTTT_FOXO4_01	TGGAAA_NFAT_Q4_01	AACTTT_UNKNOWN
4978	OPCML	opioid binding protein/cell adhesion molecule-like			CTTTGT_LEF1_Q2			TTGTTT_FOXO4_01	TGGAAA_NFAT_Q4_01		CAGCTG_AP4_Q5	CTGCAGY_UNKNOWN
7552	ZNF711	zinc finger protein 711			CTTTGT_LEF1_Q2			TTGTTT_FOXO4_01	TGGAAA_NFAT_Q4_01			CTGCAGY_UNKNOWN
85465	EPT1	ethanolaminephosphotransferase 1 (CDP-ethanolamine-specific)			CTTTGT_LEF1_Q2			TTGTTT_FOXO4_01	TGGAAA_NFAT_Q4_01
54407	SLC38A2	solute carrier family 38, member 2			CTTTGT_LEF1_Q2			TTGTTT_FOXO4_01	TGGAAA_NFAT_Q4_01
9448	MAP4K4	mitogen-activated protein kinase kinase kinase kinase 4			CTTTGT_LEF1_Q2			TTGTTT_FOXO4_01	TGGAAA_NFAT_Q4_01
6328	SCN3A	sodium channel, voltage-gated, type III, alpha subunit			CTTTGT_LEF1_Q2			TTGTTT_FOXO4_01	TGGAAA_NFAT_Q4_01
25975	EGFL6	EGF-like-domain, multiple 6			CTTTGT_LEF1_Q2			TTGTTT_FOXO4_01	TGGAAA_NFAT_Q4_01
65244	SPATS2	spermatogenesis associated, serine-rich 2			CTTTGT_LEF1_Q2			TTGTTT_FOXO4_01	TGGAAA_NFAT_Q4_01
4094	MAF	v-maf musculoaponeurotic fibrosarcoma oncogene homolog (avian)			CTTTGT_LEF1_Q2			TTGTTT_FOXO4_01		AACTTT_UNKNOWN	CAGCTG_AP4_Q5	CTGCAGY_UNKNOWN
5150	PDE7A	phosphodiesterase 7A			CTTTGT_LEF1_Q2			TTGTTT_FOXO4_01		AACTTT_UNKNOWN	CAGCTG_AP4_Q5
54510	PCDH18	protocadherin 18			CTTTGT_LEF1_Q2			TTGTTT_FOXO4_01		AACTTT_UNKNOWN	CAGCTG_AP4_Q5
80319	CXXC4	CXXC finger protein 4			CTTTGT_LEF1_Q2			TTGTTT_FOXO4_01		AACTTT_UNKNOWN	CAGCTG_AP4_Q5
4741	NEFM	neurofilament, medium polypeptide			CTTTGT_LEF1_Q2			TTGTTT_FOXO4_01		AACTTT_UNKNOWN
23012	STK38L	serine/threonine kinase 38 like			CTTTGT_LEF1_Q2			TTGTTT_FOXO4_01		AACTTT_UNKNOWN
256130	TMEM196	transmembrane protein 196			CTTTGT_LEF1_Q2			TTGTTT_FOXO4_01		AACTTT_UNKNOWN
7105	TSPAN6	tetraspanin 6			CTTTGT_LEF1_Q2			TTGTTT_FOXO4_01		AACTTT_UNKNOWN
1499	CTNNB1	catenin (cadherin-associated protein), beta 1, 88kDa			CTTTGT_LEF1_Q2			TTGTTT_FOXO4_01		AACTTT_UNKNOWN
1397	CRIP2	cysteine-rich protein 2			CTTTGT_LEF1_Q2			TTGTTT_FOXO4_01			CAGCTG_AP4_Q5	CTGCAGY_UNKNOWN
3983	ABLIM1	actin binding LIM protein 1			CTTTGT_LEF1_Q2			TTGTTT_FOXO4_01			CAGCTG_AP4_Q5
22858	ICK	intestinal cell (MAK-like) kinase			CTTTGT_LEF1_Q2			TTGTTT_FOXO4_01				CTGCAGY_UNKNOWN
128338	DRAM2	DNA-damage regulated autophagy modulator 2			CTTTGT_LEF1_Q2			TTGTTT_FOXO4_01
2791	GNG11	guanine nucleotide binding protein (G protein), gamma 11			CTTTGT_LEF1_Q2			TTGTTT_FOXO4_01
10750	GRAP	GRB2-related adaptor protein			CTTTGT_LEF1_Q2			TTGTTT_FOXO4_01
6480	ST6GAL1	ST6 beta-galactosamide alpha-2,6-sialyltranferase 1			CTTTGT_LEF1_Q2			TTGTTT_FOXO4_01
90957	DHX57	DEAH (Asp-Glu-Ala-Asp/His) box polypeptide 57			CTTTGT_LEF1_Q2			TTGTTT_FOXO4_01
10970	CKAP4	cytoskeleton-associated protein 4			CTTTGT_LEF1_Q2			TTGTTT_FOXO4_01
10018	BCL2L11	BCL2-like 11 (apoptosis facilitator)			CTTTGT_LEF1_Q2			TTGTTT_FOXO4_01
2745	GLRX	glutaredoxin (thioltransferase)			CTTTGT_LEF1_Q2			TTGTTT_FOXO4_01
2835	GPR12	G protein-coupled receptor 12			CTTTGT_LEF1_Q2			TTGTTT_FOXO4_01
55884	WSB2	WD repeat and SOCS box containing 2			CTTTGT_LEF1_Q2			TTGTTT_FOXO4_01
9442	MED27	mediator complex subunit 27			CTTTGT_LEF1_Q2			TTGTTT_FOXO4_01
118812	MORN4	MORN repeat containing 4			CTTTGT_LEF1_Q2			TTGTTT_FOXO4_01
83856	FSD1L	fibronectin type III and SPRY domain containing 1-like			CTTTGT_LEF1_Q2			TTGTTT_FOXO4_01
3796	KIF2A	kinesin heavy chain member 2A			CTTTGT_LEF1_Q2			TTGTTT_FOXO4_01
6916	TBXAS1	thromboxane A synthase 1 (platelet)			CTTTGT_LEF1_Q2				TGGAAA_NFAT_Q4_01	AACTTT_UNKNOWN
2255	FGF10	fibroblast growth factor 10			CTTTGT_LEF1_Q2				TGGAAA_NFAT_Q4_01	AACTTT_UNKNOWN
126626	GABPB2	GA binding protein transcription factor, beta subunit 2			CTTTGT_LEF1_Q2				TGGAAA_NFAT_Q4_01		CAGCTG_AP4_Q5
7345	UCHL1	ubiquitin carboxyl-terminal esterase L1 (ubiquitin thiolesterase)			CTTTGT_LEF1_Q2				TGGAAA_NFAT_Q4_01
2651	GCNT2	glucosaminyl (N-acetyl) transferase 2, I-branching enzyme (I blood group)			CTTTGT_LEF1_Q2				TGGAAA_NFAT_Q4_01
55297	CCDC91	coiled-coil domain containing 91			CTTTGT_LEF1_Q2				TGGAAA_NFAT_Q4_01
666	BOK	BCL2-related ovarian killer			CTTTGT_LEF1_Q2				TGGAAA_NFAT_Q4_01
2191	FAP	fibroblast activation protein, alpha			CTTTGT_LEF1_Q2				TGGAAA_NFAT_Q4_01
2331	FMOD	fibromodulin			CTTTGT_LEF1_Q2				TGGAAA_NFAT_Q4_01
7168	TPM1	tropomyosin 1 (alpha)			CTTTGT_LEF1_Q2				TGGAAA_NFAT_Q4_01
114788	CSMD3	CUB and Sushi multiple domains 3			CTTTGT_LEF1_Q2					AACTTT_UNKNOWN	CAGCTG_AP4_Q5
5738	PTGFRN	prostaglandin F2 receptor negative regulator			CTTTGT_LEF1_Q2					AACTTT_UNKNOWN	CAGCTG_AP4_Q5
2120	ETV6	ets variant 6			CTTTGT_LEF1_Q2					AACTTT_UNKNOWN
54462	FAM190B	family with sequence similarity 190, member B			CTTTGT_LEF1_Q2					AACTTT_UNKNOWN
7804	LRP8	low density lipoprotein receptor-related protein 8, apolipoprotein e receptor			CTTTGT_LEF1_Q2					AACTTT_UNKNOWN
10409	BASP1	brain abundant, membrane attached signal protein 1			CTTTGT_LEF1_Q2					AACTTT_UNKNOWN
64282	PAPD5	PAP associated domain containing 5			CTTTGT_LEF1_Q2					AACTTT_UNKNOWN
5600	MAPK11	mitogen-activated protein kinase 11			CTTTGT_LEF1_Q2					AACTTT_UNKNOWN
83692	CD99L2	CD99 molecule-like 2			CTTTGT_LEF1_Q2						CAGCTG_AP4_Q5	CTGCAGY_UNKNOWN
22902	RUFY3	RUN and FYVE domain containing 3			CTTTGT_LEF1_Q2						CAGCTG_AP4_Q5
10142	AKAP9	A kinase (PRKA) anchor protein (yotiao) 9			CTTTGT_LEF1_Q2						CAGCTG_AP4_Q5
571	BACH1	BTB and CNC homology 1, basic leucine zipper transcription factor 1			CTTTGT_LEF1_Q2						CAGCTG_AP4_Q5
3897	L1CAM	L1 cell adhesion molecule			CTTTGT_LEF1_Q2						CAGCTG_AP4_Q5
1036	CDO1	cysteine dioxygenase, type I			CTTTGT_LEF1_Q2						CAGCTG_AP4_Q5
468	ATF4	activating transcription factor 4 (tax-responsive enhancer element B67)			CTTTGT_LEF1_Q2							CTGCAGY_UNKNOWN
10325	RRAGB	Ras-related GTP binding B			CTTTGT_LEF1_Q2							CTGCAGY_UNKNOWN
164045	HFM1	HFM1, ATP-dependent DNA helicase homolog (S. cerevisiae)			CTTTGT_LEF1_Q2							CTGCAGY_UNKNOWN
7533	YWHAH	tyrosine 3-monooxygenase/tryptophan 5-monooxygenase activation protein, eta polypeptide			CTTTGT_LEF1_Q2
3798	KIF5A	kinesin family member 5A			CTTTGT_LEF1_Q2
121601	ANO4	anoctamin 4			CTTTGT_LEF1_Q2
390	RND3	Rho family GTPase 3			CTTTGT_LEF1_Q2
22846	VASH1	vasohibin 1			CTTTGT_LEF1_Q2
84376	HOOK3	hook homolog 3 (Drosophila)			CTTTGT_LEF1_Q2
55558	PLXNA3	plexin A3			CTTTGT_LEF1_Q2
91050	CCDC149	coiled-coil domain containing 149			CTTTGT_LEF1_Q2
55717	WDR11	WD repeat domain 11			CTTTGT_LEF1_Q2
284325	C19orf54	chromosome 19 open reading frame 54			CTTTGT_LEF1_Q2
328	APEX1	APEX nuclease (multifunctional DNA repair enzyme) 1			CTTTGT_LEF1_Q2
26136	TES	testis derived transcript (3 LIM domains)			CTTTGT_LEF1_Q2
26502	NARF	nuclear prelamin A recognition factor			CTTTGT_LEF1_Q2
1063	CENPF	centromere protein F, 350/400kDa (mitosin)			CTTTGT_LEF1_Q2
55506	H2AFY2	H2A histone family, member Y2			CTTTGT_LEF1_Q2
51194	IPO11	importin 11			CTTTGT_LEF1_Q2
64116	SLC39A8	solute carrier family 39 (zinc transporter), member 8			CTTTGT_LEF1_Q2
4133	MAP2	microtubule-associated protein 2			CTTTGT_LEF1_Q2
51143	DYNC1LI1	dynein, cytoplasmic 1, light intermediate chain 1			CTTTGT_LEF1_Q2
116	ADCYAP1	adenylate cyclase activating polypeptide 1 (pituitary)			CTTTGT_LEF1_Q2
6175	RPLP0	ribosomal protein, large, P0			CTTTGT_LEF1_Q2
9989	PPP4R1	protein phosphatase 4, regulatory subunit 1			CTTTGT_LEF1_Q2
55608	ANKRD10	ankyrin repeat domain 10			CTTTGT_LEF1_Q2
23008	KLHDC10	kelch domain containing 10			CTTTGT_LEF1_Q2
4233	MET	met proto-oncogene (hepatocyte growth factor receptor)			CTTTGT_LEF1_Q2
85440	DOCK7	dedicator of cytokinesis 7			CTTTGT_LEF1_Q2
1781	DYNC1I2	dynein, cytoplasmic 1, intermediate chain 2			CTTTGT_LEF1_Q2
85300	ATCAY	ataxia, cerebellar, Cayman type			CTTTGT_LEF1_Q2
64805	P2RY12	purinergic receptor P2Y, G-protein coupled, 12			CTTTGT_LEF1_Q2
79897	RPP21	ribonuclease P/MRP 21kDa subunit			CTTTGT_LEF1_Q2
5612	PRKRIR	protein-kinase, interferon-inducible double stranded RNA dependent inhibitor, repressor of (P58 repressor)			CTTTGT_LEF1_Q2
359845	FAM101B	family with sequence similarity 101, member B			CTTTGT_LEF1_Q2
1306	COL15A1	collagen, type XV, alpha 1			CTTTGT_LEF1_Q2
55220	KLHDC8A	kelch domain containing 8A			CTTTGT_LEF1_Q2
2632	GBE1	glucan (1,4-alpha-), branching enzyme 1			CTTTGT_LEF1_Q2
1496	CTNNA2	catenin (cadherin-associated protein), alpha 2			CTTTGT_LEF1_Q2
151295	SLC23A3	solute carrier family 23 (nucleobase transporters), member 3			CTTTGT_LEF1_Q2
50801	KCNK4	potassium channel, subfamily K, member 4			CTTTGT_LEF1_Q2
4801	NFYB	nuclear transcription factor Y, beta			CTTTGT_LEF1_Q2
23451	SF3B1	splicing factor 3b, subunit 1, 155kDa			CTTTGT_LEF1_Q2
9870	KIAA0317	KIAA0317			CTTTGT_LEF1_Q2
203068	TUBB	tubulin, beta class I			CTTTGT_LEF1_Q2
7703	PCGF2	polycomb group ring finger 2			CTTTGT_LEF1_Q2
93487	MAPK1IP1L	mitogen-activated protein kinase 1 interacting protein 1-like			CTTTGT_LEF1_Q2
9465	AKAP7	A kinase (PRKA) anchor protein 7			CTTTGT_LEF1_Q2
7993	UBXN8	UBX domain protein 8			CTTTGT_LEF1_Q2
998	CDC42	cell division cycle 42 (GTP binding protein, 25kDa)			CTTTGT_LEF1_Q2
29114	TAGLN3	transgelin 3			CTTTGT_LEF1_Q2
56975	FAM20C	family with sequence similarity 20, member C			CTTTGT_LEF1_Q2
29767	TMOD2	tropomodulin 2 (neuronal)			CTTTGT_LEF1_Q2
125058	TBC1D16	TBC1 domain family, member 16			CTTTGT_LEF1_Q2
11094	C9orf7	chromosome 9 open reading frame 7			CTTTGT_LEF1_Q2
89857	KLHL6	kelch-like 6 (Drosophila)			CTTTGT_LEF1_Q2
205147	FAM123C	family with sequence similarity 123C			CTTTGT_LEF1_Q2
55529	TMEM55A	transmembrane protein 55A			CTTTGT_LEF1_Q2
8557	TCAP	titin-cap (telethonin)			CTTTGT_LEF1_Q2
116228	FAM36A	family with sequence similarity 36, member A			CTTTGT_LEF1_Q2
147949	ZNF583	zinc finger protein 583			CTTTGT_LEF1_Q2
2235	FECH	ferrochelatase			CTTTGT_LEF1_Q2
2512	FTL	ferritin, light polypeptide			CTTTGT_LEF1_Q2
27065	D4S234E	DNA segment on chromosome 4 (unique) 234 expressed sequence			CTTTGT_LEF1_Q2
2313	FLI1	Friend leukemia virus integration 1				GGGAGGRR_MAZ_Q6	GGGTGGRR_PAX4_03	TTGTTT_FOXO4_01	TGGAAA_NFAT_Q4_01	AACTTT_UNKNOWN		CTGCAGY_UNKNOWN
5595	MAPK3	mitogen-activated protein kinase 3				GGGAGGRR_MAZ_Q6	GGGTGGRR_PAX4_03	TTGTTT_FOXO4_01		AACTTT_UNKNOWN
6778	STAT6	signal transducer and activator of transcription 6, interleukin-4 induced				GGGAGGRR_MAZ_Q6	GGGTGGRR_PAX4_03	TTGTTT_FOXO4_01
953	ENTPD1	ectonucleoside triphosphate diphosphohydrolase 1				GGGAGGRR_MAZ_Q6	GGGTGGRR_PAX4_03	TTGTTT_FOXO4_01
8202	NCOA3	nuclear receptor coactivator 3				GGGAGGRR_MAZ_Q6	GGGTGGRR_PAX4_03		TGGAAA_NFAT_Q4_01	AACTTT_UNKNOWN
377	ARF3	ADP-ribosylation factor 3				GGGAGGRR_MAZ_Q6	GGGTGGRR_PAX4_03			AACTTT_UNKNOWN		CTGCAGY_UNKNOWN
144402	CPNE8	copine VIII				GGGAGGRR_MAZ_Q6	GGGTGGRR_PAX4_03			AACTTT_UNKNOWN
9500	MAGED1	melanoma antigen family D, 1				GGGAGGRR_MAZ_Q6	GGGTGGRR_PAX4_03				CAGCTG_AP4_Q5	CTGCAGY_UNKNOWN
3932	LCK	lymphocyte-specific protein tyrosine kinase				GGGAGGRR_MAZ_Q6	GGGTGGRR_PAX4_03				CAGCTG_AP4_Q5	CTGCAGY_UNKNOWN
9832	JAKMIP2	janus kinase and microtubule interacting protein 2				GGGAGGRR_MAZ_Q6	GGGTGGRR_PAX4_03				CAGCTG_AP4_Q5
894	CCND2	cyclin D2				GGGAGGRR_MAZ_Q6	GGGTGGRR_PAX4_03				CAGCTG_AP4_Q5
8646	CHRD	chordin				GGGAGGRR_MAZ_Q6	GGGTGGRR_PAX4_03				CAGCTG_AP4_Q5
2840	GPR17	G protein-coupled receptor 17				GGGAGGRR_MAZ_Q6	GGGTGGRR_PAX4_03				CAGCTG_AP4_Q5
51560	RAB6B	RAB6B, member RAS oncogene family				GGGAGGRR_MAZ_Q6	GGGTGGRR_PAX4_03
7075	TIE1	tyrosine kinase with immunoglobulin-like and EGF-like domains 1				GGGAGGRR_MAZ_Q6	GGGTGGRR_PAX4_03
9362	CPNE6	copine VI (neuronal)				GGGAGGRR_MAZ_Q6	GGGTGGRR_PAX4_03
4478	MSN	moesin				GGGAGGRR_MAZ_Q6	GGGTGGRR_PAX4_03
29942	PURG	purine-rich element binding protein G				GGGAGGRR_MAZ_Q6	GGGTGGRR_PAX4_03
25999	CLIP3	CAP-GLY domain containing linker protein 3				GGGAGGRR_MAZ_Q6	GGGTGGRR_PAX4_03
3678	ITGA5	integrin, alpha 5 (fibronectin receptor, alpha polypeptide)				GGGAGGRR_MAZ_Q6	GGGTGGRR_PAX4_03
2259	FGF14	fibroblast growth factor 14				GGGAGGRR_MAZ_Q6		TTGTTT_FOXO4_01	TGGAAA_NFAT_Q4_01	AACTTT_UNKNOWN	CAGCTG_AP4_Q5	CTGCAGY_UNKNOWN
64579	NDST4	N-deacetylase/N-sulfotransferase (heparan glucosaminyl) 4				GGGAGGRR_MAZ_Q6		TTGTTT_FOXO4_01	TGGAAA_NFAT_Q4_01	AACTTT_UNKNOWN	CAGCTG_AP4_Q5
7873	MANF	mesencephalic astrocyte-derived neurotrophic factor				GGGAGGRR_MAZ_Q6		TTGTTT_FOXO4_01	TGGAAA_NFAT_Q4_01	AACTTT_UNKNOWN
1004	CDH6	cadherin 6, type 2, K-cadherin (fetal kidney)				GGGAGGRR_MAZ_Q6		TTGTTT_FOXO4_01	TGGAAA_NFAT_Q4_01		CAGCTG_AP4_Q5	CTGCAGY_UNKNOWN
3708	ITPR1	inositol 1,4,5-trisphosphate receptor, type 1				GGGAGGRR_MAZ_Q6		TTGTTT_FOXO4_01	TGGAAA_NFAT_Q4_01
80344	DCAF11	DDB1 and CUL4 associated factor 11				GGGAGGRR_MAZ_Q6		TTGTTT_FOXO4_01	TGGAAA_NFAT_Q4_01
84316	LSMD1	LSM domain containing 1				GGGAGGRR_MAZ_Q6		TTGTTT_FOXO4_01	TGGAAA_NFAT_Q4_01
7436	VLDLR	very low density lipoprotein receptor				GGGAGGRR_MAZ_Q6		TTGTTT_FOXO4_01		AACTTT_UNKNOWN
1958	EGR1	early growth response 1				GGGAGGRR_MAZ_Q6		TTGTTT_FOXO4_01			CAGCTG_AP4_Q5	CTGCAGY_UNKNOWN
162494	RHBDL3	rhomboid, veinlet-like 3 (Drosophila)				GGGAGGRR_MAZ_Q6		TTGTTT_FOXO4_01
84928	TMEM209	transmembrane protein 209				GGGAGGRR_MAZ_Q6		TTGTTT_FOXO4_01
79733	E2F8	E2F transcription factor 8				GGGAGGRR_MAZ_Q6		TTGTTT_FOXO4_01
26009	ZZZ3	zinc finger, ZZ-type containing 3				GGGAGGRR_MAZ_Q6		TTGTTT_FOXO4_01
7461	CLIP2	CAP-GLY domain containing linker protein 2				GGGAGGRR_MAZ_Q6		TTGTTT_FOXO4_01
81618	ITM2C	integral membrane protein 2C				GGGAGGRR_MAZ_Q6			TGGAAA_NFAT_Q4_01	AACTTT_UNKNOWN
7167	TPI1	triosephosphate isomerase 1				GGGAGGRR_MAZ_Q6			TGGAAA_NFAT_Q4_01		CAGCTG_AP4_Q5
23187	PHLDB1	pleckstrin homology-like domain, family B, member 1				GGGAGGRR_MAZ_Q6			TGGAAA_NFAT_Q4_01		CAGCTG_AP4_Q5
22876	INPP5F	inositol polyphosphate-5-phosphatase F				GGGAGGRR_MAZ_Q6			TGGAAA_NFAT_Q4_01
7423	VEGFB	vascular endothelial growth factor B				GGGAGGRR_MAZ_Q6			TGGAAA_NFAT_Q4_01
65986	ZBTB10	zinc finger and BTB domain containing 10				GGGAGGRR_MAZ_Q6			TGGAAA_NFAT_Q4_01
64411	ARAP3	ArfGAP with RhoGAP domain, ankyrin repeat and PH domain 3				GGGAGGRR_MAZ_Q6			TGGAAA_NFAT_Q4_01
129684	CNTNAP5	contactin associated protein-like 5				GGGAGGRR_MAZ_Q6				AACTTT_UNKNOWN	CAGCTG_AP4_Q5
79711	IPO4	importin 4				GGGAGGRR_MAZ_Q6				AACTTT_UNKNOWN
132884	EVC2	Ellis van Creveld syndrome 2				GGGAGGRR_MAZ_Q6				AACTTT_UNKNOWN
22871	NLGN1	neuroligin 1				GGGAGGRR_MAZ_Q6				AACTTT_UNKNOWN
5864	RAB3A	RAB3A, member RAS oncogene family				GGGAGGRR_MAZ_Q6					CAGCTG_AP4_Q5	CTGCAGY_UNKNOWN
7139	TNNT2	troponin T type 2 (cardiac)				GGGAGGRR_MAZ_Q6					CAGCTG_AP4_Q5
78986	DUSP26	dual specificity phosphatase 26 (putative)				GGGAGGRR_MAZ_Q6					CAGCTG_AP4_Q5
131408	FAM131A	family with sequence similarity 131, member A				GGGAGGRR_MAZ_Q6					CAGCTG_AP4_Q5
4613	MYCN	v-myc myelocytomatosis viral related oncogene, neuroblastoma derived (avian)				GGGAGGRR_MAZ_Q6					CAGCTG_AP4_Q5
57572	DOCK6	dedicator of cytokinesis 6				GGGAGGRR_MAZ_Q6					CAGCTG_AP4_Q5
51807	TUBA8	tubulin, alpha 8				GGGAGGRR_MAZ_Q6					CAGCTG_AP4_Q5
79930	DOK3	docking protein 3				GGGAGGRR_MAZ_Q6					CAGCTG_AP4_Q5
84249	PSD2	pleckstrin and Sec7 domain containing 2				GGGAGGRR_MAZ_Q6					CAGCTG_AP4_Q5
6604	SMARCD3	SWI/SNF related, matrix associated, actin dependent regulator of chromatin, subfamily d, member 3				GGGAGGRR_MAZ_Q6						CTGCAGY_UNKNOWN
977	CD151	CD151 molecule (Raph blood group)				GGGAGGRR_MAZ_Q6						CTGCAGY_UNKNOWN
4674	NAP1L2	nucleosome assembly protein 1-like 2				GGGAGGRR_MAZ_Q6						CTGCAGY_UNKNOWN
2617	GARS	glycyl-tRNA synthetase				GGGAGGRR_MAZ_Q6						CTGCAGY_UNKNOWN
8751	ADAM15	ADAM metallopeptidase domain 15				GGGAGGRR_MAZ_Q6
50813	COPS7A	COP9 constitutive photomorphogenic homolog subunit 7A (Arabidopsis)				GGGAGGRR_MAZ_Q6
343641	TGM6	transglutaminase 6				GGGAGGRR_MAZ_Q6
55288	RHOT1	ras homolog gene family, member T1				GGGAGGRR_MAZ_Q6
11135	CDC42EP1	CDC42 effector protein (Rho GTPase binding) 1				GGGAGGRR_MAZ_Q6
476	ATP1A1	ATPase, Na+/K+ transporting, alpha 1 polypeptide				GGGAGGRR_MAZ_Q6
960	CD44	CD44 molecule (Indian blood group)				GGGAGGRR_MAZ_Q6
4074	M6PR	mannose-6-phosphate receptor (cation dependent)				GGGAGGRR_MAZ_Q6
1911	PHC1	polyhomeotic homolog 1 (Drosophila)				GGGAGGRR_MAZ_Q6
81502	HM13	histocompatibility (minor) 13				GGGAGGRR_MAZ_Q6
2583	B4GALNT1	beta-1,4-N-acetyl-galactosaminyl transferase 1				GGGAGGRR_MAZ_Q6
79057	PRRG3	proline rich Gla (G-carboxyglutamic acid) 3 (transmembrane)				GGGAGGRR_MAZ_Q6
257019	FRMD3	FERM domain containing 3				GGGAGGRR_MAZ_Q6
6651	SON	SON DNA binding protein				GGGAGGRR_MAZ_Q6
6430	SRSF5	serine/arginine-rich splicing factor 5				GGGAGGRR_MAZ_Q6
187	APLNR	apelin receptor				GGGAGGRR_MAZ_Q6
9575	CLOCK	clock homolog (mouse)				GGGAGGRR_MAZ_Q6
348654	GEN1	Gen homolog 1, endonuclease (Drosophila)				GGGAGGRR_MAZ_Q6
54788	DNAJB12	DnaJ (Hsp40) homolog, subfamily B, member 12				GGGAGGRR_MAZ_Q6
3187	HNRNPH1	heterogeneous nuclear ribonucleoprotein H1 (H)				GGGAGGRR_MAZ_Q6
6125	RPL5	ribosomal protein L5				GGGAGGRR_MAZ_Q6
337867	UBAC2	UBA domain containing 2				GGGAGGRR_MAZ_Q6
54664	TMEM106B	transmembrane protein 106B				GGGAGGRR_MAZ_Q6
85377	MICALL1	MICAL-like 1				GGGAGGRR_MAZ_Q6
23413	NCS1	neuronal calcium sensor 1				GGGAGGRR_MAZ_Q6
1290	COL5A2	collagen, type V, alpha 2				GGGAGGRR_MAZ_Q6
83694	RPS6KL1	ribosomal protein S6 kinase-like 1				GGGAGGRR_MAZ_Q6
81855	SFXN3	sideroflexin 3				GGGAGGRR_MAZ_Q6
11211	FZD10	frizzled family receptor 10				GGGAGGRR_MAZ_Q6
9675	TTI1	Tel2 interacting protein 1 homolog (S. pombe)				GGGAGGRR_MAZ_Q6
9487	PIGL	phosphatidylinositol glycan anchor biosynthesis, class L				GGGAGGRR_MAZ_Q6
23237	ARC	activity-regulated cytoskeleton-associated protein				GGGAGGRR_MAZ_Q6
720	C4A	complement component 4A (Rodgers blood group)				GGGAGGRR_MAZ_Q6
11033	ADAP1	ArfGAP with dual PH domains 1				GGGAGGRR_MAZ_Q6
84302	C9orf125	chromosome 9 open reading frame 125				GGGAGGRR_MAZ_Q6
3949	LDLR	low density lipoprotein receptor				GGGAGGRR_MAZ_Q6
2896	GRN	granulin				GGGAGGRR_MAZ_Q6
84867	PTPN5	protein tyrosine phosphatase, non-receptor type 5 (striatum-enriched)				GGGAGGRR_MAZ_Q6
84182	FAM188B	family with sequence similarity 188, member B				GGGAGGRR_MAZ_Q6
1263	PLK3	polo-like kinase 3				GGGAGGRR_MAZ_Q6
79066	METTL16	methyltransferase like 16				GGGAGGRR_MAZ_Q6
9812	KIAA0141	KIAA0141				GGGAGGRR_MAZ_Q6
9122	SLC16A4	solute carrier family 16, member 4 (monocarboxylic acid transporter 5)				GGGAGGRR_MAZ_Q6
5652	PRSS8	protease, serine, 8				GGGAGGRR_MAZ_Q6
84795	PYROXD2	pyridine nucleotide-disulphide oxidoreductase domain 2				GGGAGGRR_MAZ_Q6
80059	LRRTM4	leucine rich repeat transmembrane neuronal 4					GGGTGGRR_PAX4_03	TTGTTT_FOXO4_01	TGGAAA_NFAT_Q4_01	AACTTT_UNKNOWN
83988	NCALD	neurocalcin delta					GGGTGGRR_PAX4_03	TTGTTT_FOXO4_01		AACTTT_UNKNOWN
59345	GNB4	guanine nucleotide binding protein (G protein), beta polypeptide 4					GGGTGGRR_PAX4_03	TTGTTT_FOXO4_01		AACTTT_UNKNOWN
131377	KBTBD5	kelch repeat and BTB (POZ) domain containing 5					GGGTGGRR_PAX4_03	TTGTTT_FOXO4_01			CAGCTG_AP4_Q5	CTGCAGY_UNKNOWN
9603	NFE2L3	nuclear factor (erythroid-derived 2)-like 3					GGGTGGRR_PAX4_03	TTGTTT_FOXO4_01
79827	CLMP	CXADR-like membrane protein					GGGTGGRR_PAX4_03	TTGTTT_FOXO4_01
51063	CALHM2	calcium homeostasis modulator 2					GGGTGGRR_PAX4_03		TGGAAA_NFAT_Q4_01
6281	S100A10	S100 calcium binding protein A10					GGGTGGRR_PAX4_03		TGGAAA_NFAT_Q4_01
3699	ITIH3	inter-alpha-trypsin inhibitor heavy chain 3					GGGTGGRR_PAX4_03		TGGAAA_NFAT_Q4_01
399947	C11orf87	chromosome 11 open reading frame 87					GGGTGGRR_PAX4_03			AACTTT_UNKNOWN	CAGCTG_AP4_Q5	CTGCAGY_UNKNOWN
5526	PPP2R5B	protein phosphatase 2, regulatory subunit B', beta					GGGTGGRR_PAX4_03			AACTTT_UNKNOWN		CTGCAGY_UNKNOWN
10021	HCN4	hyperpolarization activated cyclic nucleotide-gated potassium channel 4					GGGTGGRR_PAX4_03			AACTTT_UNKNOWN
10928	RALBP1	ralA binding protein 1					GGGTGGRR_PAX4_03			AACTTT_UNKNOWN
10109	ARPC2	actin related protein 2/3 complex, subunit 2, 34kDa					GGGTGGRR_PAX4_03			AACTTT_UNKNOWN
11261	CHP	calcium binding protein P22					GGGTGGRR_PAX4_03			AACTTT_UNKNOWN
4836	NMT1	N-myristoyltransferase 1					GGGTGGRR_PAX4_03			AACTTT_UNKNOWN
5207	PFKFB1	6-phosphofructo-2-kinase/fructose-2,6-biphosphatase 1					GGGTGGRR_PAX4_03			AACTTT_UNKNOWN
9735	KNTC1	kinetochore associated 1					GGGTGGRR_PAX4_03			AACTTT_UNKNOWN
157313	CDCA2	cell division cycle associated 2					GGGTGGRR_PAX4_03			AACTTT_UNKNOWN
5837	PYGM	phosphorylase, glycogen, muscle					GGGTGGRR_PAX4_03				CAGCTG_AP4_Q5
9937	DCLRE1A	DNA cross-link repair 1A					GGGTGGRR_PAX4_03				CAGCTG_AP4_Q5
148014	TTC9B	tetratricopeptide repeat domain 9B					GGGTGGRR_PAX4_03					CTGCAGY_UNKNOWN
7001	PRDX2	peroxiredoxin 2					GGGTGGRR_PAX4_03					CTGCAGY_UNKNOWN
55698	RADIL	Ras association and DIL domains					GGGTGGRR_PAX4_03
506	ATP5B	ATP synthase, H+ transporting, mitochondrial F1 complex, beta polypeptide					GGGTGGRR_PAX4_03
6668	SP2	Sp2 transcription factor					GGGTGGRR_PAX4_03
140831	ZSWIM3	zinc finger, SWIM-type containing 3					GGGTGGRR_PAX4_03
1445	CSK	c-src tyrosine kinase					GGGTGGRR_PAX4_03
5829	PXN	paxillin					GGGTGGRR_PAX4_03
51393	TRPV2	transient receptor potential cation channel, subfamily V, member 2					GGGTGGRR_PAX4_03
84134	TOMM40L	translocase of outer mitochondrial membrane 40 homolog (yeast)-like					GGGTGGRR_PAX4_03
1718	DHCR24	24-dehydrocholesterol reductase					GGGTGGRR_PAX4_03
78990	OTUB2	OTU domain, ubiquitin aldehyde binding 2					GGGTGGRR_PAX4_03
397	ARHGDIB	Rho GDP dissociation inhibitor (GDI) beta					GGGTGGRR_PAX4_03
22899	ARHGEF15	Rho guanine nucleotide exchange factor (GEF) 15					GGGTGGRR_PAX4_03
25797	QPCT	glutaminyl-peptide cyclotransferase					GGGTGGRR_PAX4_03
92745	SLC38A5	solute carrier family 38, member 5					GGGTGGRR_PAX4_03
3014	H2AFX	H2A histone family, member X					GGGTGGRR_PAX4_03
890	CCNA2	cyclin A2					GGGTGGRR_PAX4_03
9776	ATG13	ATG13 autophagy related 13 homolog (S. cerevisiae)					GGGTGGRR_PAX4_03
310	ANXA7	annexin A7					GGGTGGRR_PAX4_03
84557	MAP1LC3A	microtubule-associated protein 1 light chain 3 alpha					GGGTGGRR_PAX4_03
64137	ABCG4	ATP-binding cassette, sub-family G (WHITE), member 4					GGGTGGRR_PAX4_03
4331	MNAT1	menage a trois homolog 1, cyclin H assembly factor (Xenopus laevis)					GGGTGGRR_PAX4_03
92691	TMEM169	transmembrane protein 169					GGGTGGRR_PAX4_03
11309	SLCO2B1	solute carrier organic anion transporter family, member 2B1					GGGTGGRR_PAX4_03
79703	C11orf80	chromosome 11 open reading frame 80					GGGTGGRR_PAX4_03
4736	RPL10A	ribosomal protein L10a					GGGTGGRR_PAX4_03
338773	TMEM119	transmembrane protein 119					GGGTGGRR_PAX4_03
53822	FXYD7	FXYD domain containing ion transport regulator 7					GGGTGGRR_PAX4_03
10287	RGS19	regulator of G-protein signaling 19					GGGTGGRR_PAX4_03
3859	KRT12	keratin 12					GGGTGGRR_PAX4_03
10232	MSLN	mesothelin					GGGTGGRR_PAX4_03
4987	OPRL1	opiate receptor-like 1					GGGTGGRR_PAX4_03
80036	TRPM3	transient receptor potential cation channel, subfamily M, member 3						TTGTTT_FOXO4_01	TGGAAA_NFAT_Q4_01	AACTTT_UNKNOWN
5212	VIT	vitrin						TTGTTT_FOXO4_01	TGGAAA_NFAT_Q4_01	AACTTT_UNKNOWN
140890	SREK1	splicing regulatory glutamine/lysine-rich protein 1						TTGTTT_FOXO4_01	TGGAAA_NFAT_Q4_01	AACTTT_UNKNOWN
7468	WHSC1	Wolf-Hirschhorn syndrome candidate 1						TTGTTT_FOXO4_01	TGGAAA_NFAT_Q4_01	AACTTT_UNKNOWN
81575	APOLD1	apolipoprotein L domain containing 1						TTGTTT_FOXO4_01	TGGAAA_NFAT_Q4_01		CAGCTG_AP4_Q5
54674	LRRN3	leucine rich repeat neuronal 3						TTGTTT_FOXO4_01	TGGAAA_NFAT_Q4_01		CAGCTG_AP4_Q5
2113	ETS1	v-ets erythroblastosis virus E26 oncogene homolog 1 (avian)						TTGTTT_FOXO4_01	TGGAAA_NFAT_Q4_01		CAGCTG_AP4_Q5
11167	FSTL1	follistatin-like 1						TTGTTT_FOXO4_01	TGGAAA_NFAT_Q4_01
9324	HMGN3	high mobility group nucleosomal binding domain 3						TTGTTT_FOXO4_01	TGGAAA_NFAT_Q4_01
83641	FAM107B	family with sequence similarity 107, member B						TTGTTT_FOXO4_01	TGGAAA_NFAT_Q4_01
57569	ARHGAP20	Rho GTPase activating protein 20						TTGTTT_FOXO4_01	TGGAAA_NFAT_Q4_01
7456	WIPF1	WAS/WASL interacting protein family, member 1						TTGTTT_FOXO4_01	TGGAAA_NFAT_Q4_01
25780	RASGRP3	RAS guanyl releasing protein 3 (calcium and DAG-regulated)						TTGTTT_FOXO4_01	TGGAAA_NFAT_Q4_01
23314	SATB2	SATB homeobox 2						TTGTTT_FOXO4_01	TGGAAA_NFAT_Q4_01
8864	PER2	period homolog 2 (Drosophila)						TTGTTT_FOXO4_01	TGGAAA_NFAT_Q4_01
152110	NEK10	NIMA (never in mitosis gene a)- related kinase 10						TTGTTT_FOXO4_01	TGGAAA_NFAT_Q4_01
90861	HN1L	hematological and neurological expressed 1-like						TTGTTT_FOXO4_01	TGGAAA_NFAT_Q4_01
79634	SCRN3	secernin 3						TTGTTT_FOXO4_01	TGGAAA_NFAT_Q4_01
80199	FUZ	fuzzy homolog (Drosophila)						TTGTTT_FOXO4_01	TGGAAA_NFAT_Q4_01
27346	TMEM97	transmembrane protein 97						TTGTTT_FOXO4_01	TGGAAA_NFAT_Q4_01
25891	PAMR1	peptidase domain containing associated with muscle regeneration 1						TTGTTT_FOXO4_01	TGGAAA_NFAT_Q4_01
4857	NOVA1	neuro-oncological ventral antigen 1						TTGTTT_FOXO4_01		AACTTT_UNKNOWN	CAGCTG_AP4_Q5	CTGCAGY_UNKNOWN
3672	ITGA1	integrin, alpha 1						TTGTTT_FOXO4_01		AACTTT_UNKNOWN
10228	STX6	syntaxin 6						TTGTTT_FOXO4_01		AACTTT_UNKNOWN
8555	CDC14B	CDC14 cell division cycle 14 homolog B (S. cerevisiae)						TTGTTT_FOXO4_01		AACTTT_UNKNOWN
9184	BUB3	budding uninhibited by benzimidazoles 3 homolog (yeast)						TTGTTT_FOXO4_01		AACTTT_UNKNOWN
164633	CABP7	calcium binding protein 7						TTGTTT_FOXO4_01		AACTTT_UNKNOWN
140767	NRSN1	neurensin 1						TTGTTT_FOXO4_01		AACTTT_UNKNOWN
283576	ZDHHC22	zinc finger, DHHC-type containing 22						TTGTTT_FOXO4_01		AACTTT_UNKNOWN
59350	RXFP1	relaxin/insulin-like family peptide receptor 1						TTGTTT_FOXO4_01		AACTTT_UNKNOWN
51705	EMCN	endomucin						TTGTTT_FOXO4_01		AACTTT_UNKNOWN
84084	RAB6C	RAB6C, member RAS oncogene family						TTGTTT_FOXO4_01		AACTTT_UNKNOWN
5550	PREP	prolyl endopeptidase						TTGTTT_FOXO4_01		AACTTT_UNKNOWN
55016	2001-03-01	membrane-associated ring finger (C3HC4) 1						TTGTTT_FOXO4_01			CAGCTG_AP4_Q5
29766	TMOD3	tropomodulin 3 (ubiquitous)						TTGTTT_FOXO4_01			CAGCTG_AP4_Q5
10397	NDRG1	N-myc downstream regulated 1						TTGTTT_FOXO4_01			CAGCTG_AP4_Q5
5066	PAM	peptidylglycine alpha-amidating monooxygenase						TTGTTT_FOXO4_01			CAGCTG_AP4_Q5
6404	SELPLG	selectin P ligand						TTGTTT_FOXO4_01			CAGCTG_AP4_Q5
3773	KCNJ16	potassium inwardly-rectifying channel, subfamily J, member 16						TTGTTT_FOXO4_01			CAGCTG_AP4_Q5
1113	CHGA	chromogranin A (parathyroid secretory protein 1)						TTGTTT_FOXO4_01				CTGCAGY_UNKNOWN
23334	SZT2	seizure threshold 2 homolog (mouse)						TTGTTT_FOXO4_01				CTGCAGY_UNKNOWN
84957	RELT	RELT tumor necrosis factor receptor						TTGTTT_FOXO4_01				CTGCAGY_UNKNOWN
3351	HTR1B	5-hydroxytryptamine (serotonin) receptor 1B						TTGTTT_FOXO4_01
9706	ULK2	unc-51-like kinase 2 (C. elegans)						TTGTTT_FOXO4_01
163589	TDRD5	tudor domain containing 5						TTGTTT_FOXO4_01
51134	CCDC41	coiled-coil domain containing 41						TTGTTT_FOXO4_01
274	BIN1	bridging integrator 1						TTGTTT_FOXO4_01
9685	CLINT1	clathrin interactor 1						TTGTTT_FOXO4_01
85458	DIXDC1	DIX domain containing 1						TTGTTT_FOXO4_01
51466	EVL	Enah/Vasp-like						TTGTTT_FOXO4_01
84889	SLC7A3	solute carrier family 7 (cationic amino acid transporter, y+ system), member 3						TTGTTT_FOXO4_01
51019	CCDC53	coiled-coil domain containing 53						TTGTTT_FOXO4_01
3638	INSIG1	insulin induced gene 1						TTGTTT_FOXO4_01
10845	CLPX	ClpX caseinolytic peptidase X homolog (E. coli)						TTGTTT_FOXO4_01
51000	SLC35B3	solute carrier family 35, member B3						TTGTTT_FOXO4_01
1690	COCH	coagulation factor C homolog, cochlin (Limulus polyphemus)						TTGTTT_FOXO4_01
6038	RNASE4	ribonuclease, RNase A family, 4						TTGTTT_FOXO4_01
64388	GREM2	gremlin 2						TTGTTT_FOXO4_01
2822	GPLD1	glycosylphosphatidylinositol specific phospholipase D1						TTGTTT_FOXO4_01
222537	HS3ST5	heparan sulfate (glucosamine) 3-O-sulfotransferase 5						TTGTTT_FOXO4_01
89932	PAPLN	papilin, proteoglycan-like sulfated glycoprotein						TTGTTT_FOXO4_01
112574	SNX18	sorting nexin 18						TTGTTT_FOXO4_01
8445	DYRK2	dual-specificity tyrosine-(Y)-phosphorylation regulated kinase 2						TTGTTT_FOXO4_01
100133941	CD24	CD24 molecule						TTGTTT_FOXO4_01
3937	LCP2	lymphocyte cytosolic protein 2 (SH2 domain containing leukocyte protein of 76kDa)						TTGTTT_FOXO4_01
5805	PTS	6-pyruvoyltetrahydropterin synthase						TTGTTT_FOXO4_01
5927	KDM5A	lysine (K)-specific demethylase 5A						TTGTTT_FOXO4_01
23063	WAPAL	wings apart-like homolog (Drosophila)						TTGTTT_FOXO4_01
9581	PREPL	prolyl endopeptidase-like						TTGTTT_FOXO4_01
6750	SST	somatostatin						TTGTTT_FOXO4_01
84272	YIPF4	Yip1 domain family, member 4						TTGTTT_FOXO4_01
114879	OSBPL5	oxysterol binding protein-like 5						TTGTTT_FOXO4_01
23336	SYNM	synemin, intermediate filament protein						TTGTTT_FOXO4_01
324	APC	adenomatous polyposis coli						TTGTTT_FOXO4_01
25966	C2CD2	C2 calcium-dependent domain containing 2						TTGTTT_FOXO4_01
7957	EPM2A	epilepsy, progressive myoclonus type 2A, Lafora disease (laforin)						TTGTTT_FOXO4_01
23189	KANK1	KN motif and ankyrin repeat domains 1						TTGTTT_FOXO4_01
84871	AGBL4	ATP/GTP binding protein-like 4						TTGTTT_FOXO4_01
375287	RBM43	RNA binding motif protein 43						TTGTTT_FOXO4_01
3306	HSPA2	heat shock 70kDa protein 2						TTGTTT_FOXO4_01
116461	TSEN15	tRNA splicing endonuclease 15 homolog (S. cerevisiae)						TTGTTT_FOXO4_01
51100	SH3GLB1	SH3-domain GRB2-like endophilin B1						TTGTTT_FOXO4_01
23072	HECW1	HECT, C2 and WW domain containing E3 ubiquitin protein ligase 1						TTGTTT_FOXO4_01
23155	CLCC1	chloride channel CLIC-like 1						TTGTTT_FOXO4_01
55146	ZDHHC4	zinc finger, DHHC-type containing 4						TTGTTT_FOXO4_01
60558	GUF1	GUF1 GTPase homolog (S. cerevisiae)						TTGTTT_FOXO4_01
8036	SHOC2	soc-2 suppressor of clear homolog (C. elegans)						TTGTTT_FOXO4_01
858	CAV2	caveolin 2						TTGTTT_FOXO4_01
339479	FAM5C	family with sequence similarity 5, member C							TGGAAA_NFAT_Q4_01	AACTTT_UNKNOWN	CAGCTG_AP4_Q5	CTGCAGY_UNKNOWN
7494	XBP1	X-box binding protein 1							TGGAAA_NFAT_Q4_01	AACTTT_UNKNOWN	CAGCTG_AP4_Q5
114299	PALM2	paralemmin 2							TGGAAA_NFAT_Q4_01	AACTTT_UNKNOWN	CAGCTG_AP4_Q5
493	ATP2B4	ATPase, Ca++ transporting, plasma membrane 4							TGGAAA_NFAT_Q4_01	AACTTT_UNKNOWN		CTGCAGY_UNKNOWN
163782	KANK4	KN motif and ankyrin repeat domains 4							TGGAAA_NFAT_Q4_01	AACTTT_UNKNOWN
55686	MREG	melanoregulin							TGGAAA_NFAT_Q4_01	AACTTT_UNKNOWN
8669	EIF3J	eukaryotic translation initiation factor 3, subunit J							TGGAAA_NFAT_Q4_01	AACTTT_UNKNOWN
1325	CORT	cortistatin							TGGAAA_NFAT_Q4_01	AACTTT_UNKNOWN
9489	PGS1	phosphatidylglycerophosphate synthase 1							TGGAAA_NFAT_Q4_01	AACTTT_UNKNOWN
10252	SPRY1	sprouty homolog 1, antagonist of FGF signaling (Drosophila)							TGGAAA_NFAT_Q4_01	AACTTT_UNKNOWN
9748	SLK	STE20-like kinase							TGGAAA_NFAT_Q4_01	AACTTT_UNKNOWN
871	SERPINH1	serpin peptidase inhibitor, clade H (heat shock protein 47), member 1, (collagen binding protein 1)							TGGAAA_NFAT_Q4_01	AACTTT_UNKNOWN
108	ADCY2	adenylate cyclase 2 (brain)							TGGAAA_NFAT_Q4_01	AACTTT_UNKNOWN
11311	VPS45	vacuolar protein sorting 45 homolog (S. cerevisiae)							TGGAAA_NFAT_Q4_01		CAGCTG_AP4_Q5
6711	SPTBN1	spectrin, beta, non-erythrocytic 1							TGGAAA_NFAT_Q4_01		CAGCTG_AP4_Q5
26034	IPCEF1	interaction protein for cytohesin exchange factors 1							TGGAAA_NFAT_Q4_01		CAGCTG_AP4_Q5
5596	MAPK4	mitogen-activated protein kinase 4							TGGAAA_NFAT_Q4_01		CAGCTG_AP4_Q5
7447	VSNL1	visinin-like 1							TGGAAA_NFAT_Q4_01			CTGCAGY_UNKNOWN
6326	SCN2A	sodium channel, voltage-gated, type II, alpha subunit							TGGAAA_NFAT_Q4_01			CTGCAGY_UNKNOWN
23406	COTL1	coactosin-like 1 (Dictyostelium)							TGGAAA_NFAT_Q4_01			CTGCAGY_UNKNOWN
85462	FHDC1	FH2 domain containing 1							TGGAAA_NFAT_Q4_01
291	SLC25A4	solute carrier family 25 (mitochondrial carrier; adenine nucleotide translocator), member 4							TGGAAA_NFAT_Q4_01
51109	RDH11	retinol dehydrogenase 11 (all-trans/9-cis/11-cis)							TGGAAA_NFAT_Q4_01
6320	CLEC11A	C-type lectin domain family 11, member A							TGGAAA_NFAT_Q4_01
90665	TBL1Y	transducin (beta)-like 1, Y-linked							TGGAAA_NFAT_Q4_01
51294	PCDH12	protocadherin 12							TGGAAA_NFAT_Q4_01
1565	CYP2D6	cytochrome P450, family 2, subfamily D, polypeptide 6							TGGAAA_NFAT_Q4_01
4691	NCL	nucleolin							TGGAAA_NFAT_Q4_01
134429	STARD4	StAR-related lipid transfer (START) domain containing 4							TGGAAA_NFAT_Q4_01
6049	RNF6	ring finger protein (C3H2C3 type) 6							TGGAAA_NFAT_Q4_01
27030	MLH3	mutL homolog 3 (E. coli)							TGGAAA_NFAT_Q4_01
988	CDC5L	CDC5 cell division cycle 5-like (S. pombe)							TGGAAA_NFAT_Q4_01
22824	HSPA4L	heat shock 70kDa protein 4-like							TGGAAA_NFAT_Q4_01
4311	MME	membrane metallo-endopeptidase							TGGAAA_NFAT_Q4_01
84803	AGPAT9	1-acylglycerol-3-phosphate O-acyltransferase 9							TGGAAA_NFAT_Q4_01
25977	NECAP1	NECAP endocytosis associated 1							TGGAAA_NFAT_Q4_01
408263	FNDC9	fibronectin type III domain containing 9							TGGAAA_NFAT_Q4_01
56138	PCDHA11	protocadherin alpha 11							TGGAAA_NFAT_Q4_01
8633	UNC5C	unc-5 homolog C (C. elegans)							TGGAAA_NFAT_Q4_01
10742	RAI2	retinoic acid induced 2							TGGAAA_NFAT_Q4_01
7745	ZNF192	zinc finger protein 192							TGGAAA_NFAT_Q4_01
8496	PPFIBP1	PTPRF interacting protein, binding protein 1 (liprin beta 1)							TGGAAA_NFAT_Q4_01
84617	TUBB6	tubulin, beta 6 class V							TGGAAA_NFAT_Q4_01
8417	STX7	syntaxin 7							TGGAAA_NFAT_Q4_01
6871	TADA2A	transcriptional adaptor 2A							TGGAAA_NFAT_Q4_01
9636	ISG15	ISG15 ubiquitin-like modifier							TGGAAA_NFAT_Q4_01
1363	CPE	carboxypeptidase E							TGGAAA_NFAT_Q4_01
115727	RASGRP4	RAS guanyl releasing protein 4							TGGAAA_NFAT_Q4_01
23639	LRRC6	leucine rich repeat containing 6							TGGAAA_NFAT_Q4_01
64792	RABL5	RAB, member RAS oncogene family-like 5							TGGAAA_NFAT_Q4_01
6503	SLA	Src-like-adaptor							TGGAAA_NFAT_Q4_01
5803	PTPRZ1	protein tyrosine phosphatase, receptor-type, Z polypeptide 1							TGGAAA_NFAT_Q4_01
3029	HAGH	hydroxyacylglutathione hydrolase							TGGAAA_NFAT_Q4_01
115557	ARHGEF25	Rho guanine nucleotide exchange factor (GEF) 25							TGGAAA_NFAT_Q4_01
1909	EDNRA	endothelin receptor type A							TGGAAA_NFAT_Q4_01
116328	C8orf34	chromosome 8 open reading frame 34							TGGAAA_NFAT_Q4_01
57136	C20orf3	chromosome 20 open reading frame 3							TGGAAA_NFAT_Q4_01
56136	PCDHA13	protocadherin alpha 13							TGGAAA_NFAT_Q4_01
84168	ANTXR1	anthrax toxin receptor 1							TGGAAA_NFAT_Q4_01
3156	HMGCR	3-hydroxy-3-methylglutaryl-CoA reductase							TGGAAA_NFAT_Q4_01
57488	ESYT2	extended synaptotagmin-like protein 2							TGGAAA_NFAT_Q4_01
9337	CNOT8	CCR4-NOT transcription complex, subunit 8							TGGAAA_NFAT_Q4_01
9488	PIGB	phosphatidylinositol glycan anchor biosynthesis, class B							TGGAAA_NFAT_Q4_01
83442	SH3BGRL3	SH3 domain binding glutamic acid-rich protein like 3								AACTTT_UNKNOWN	CAGCTG_AP4_Q5
1393	CRHBP	corticotropin releasing hormone binding protein								AACTTT_UNKNOWN	CAGCTG_AP4_Q5
5563	PRKAA2	protein kinase, AMP-activated, alpha 2 catalytic subunit								AACTTT_UNKNOWN	CAGCTG_AP4_Q5
114134	SLC2A13	solute carrier family 2 (facilitated glucose transporter), member 13								AACTTT_UNKNOWN
2263	FGFR2	fibroblast growth factor receptor 2								AACTTT_UNKNOWN
10085	EDIL3	EGF-like repeats and discoidin I-like domains 3								AACTTT_UNKNOWN
2847	MCHR1	melanin-concentrating hormone receptor 1								AACTTT_UNKNOWN
11065	UBE2C	ubiquitin-conjugating enzyme E2C								AACTTT_UNKNOWN
79624	C6orf211	chromosome 6 open reading frame 211								AACTTT_UNKNOWN
79776	ZFHX4	zinc finger homeobox 4								AACTTT_UNKNOWN
26121	PRPF31	PRP31 pre-mRNA processing factor 31 homolog (S. cerevisiae)								AACTTT_UNKNOWN
1316	KLF6	Kruppel-like factor 6								AACTTT_UNKNOWN
22938	SNW1	SNW domain containing 1								AACTTT_UNKNOWN
11174	ADAMTS6	ADAM metallopeptidase with thrombospondin type 1 motif, 6								AACTTT_UNKNOWN
23321	TRIM2	tripartite motif containing 2								AACTTT_UNKNOWN
280	AMY2B	amylase, alpha 2B (pancreatic)								AACTTT_UNKNOWN
5746	PTH2R	parathyroid hormone 2 receptor								AACTTT_UNKNOWN
145173	B3GALTL	beta 1,3-galactosyltransferase-like								AACTTT_UNKNOWN
7201	TRHR	thyrotropin-releasing hormone receptor								AACTTT_UNKNOWN
136647	C7orf11	chromosome 7 open reading frame 11								AACTTT_UNKNOWN
5019	OXCT1	3-oxoacid CoA transferase 1								AACTTT_UNKNOWN
55353	LAPTM4B	lysosomal protein transmembrane 4 beta								AACTTT_UNKNOWN
3621	ING1	inhibitor of growth family, member 1								AACTTT_UNKNOWN
90355	C5orf30	chromosome 5 open reading frame 30								AACTTT_UNKNOWN
112885	PHF21B	PHD finger protein 21B								AACTTT_UNKNOWN
2782	GNB1	guanine nucleotide binding protein (G protein), beta polypeptide 1								AACTTT_UNKNOWN
51114	ZDHHC9	zinc finger, DHHC-type containing 9								AACTTT_UNKNOWN
5152	PDE9A	phosphodiesterase 9A								AACTTT_UNKNOWN
26958	COPG2	coatomer protein complex, subunit gamma 2								AACTTT_UNKNOWN
50863	NTM	neurotrimin								AACTTT_UNKNOWN
5621	PRNP	prion protein								AACTTT_UNKNOWN
23205	ACSBG1	acyl-CoA synthetase bubblegum family member 1								AACTTT_UNKNOWN
53829	P2RY13	purinergic receptor P2Y, G-protein coupled, 13								AACTTT_UNKNOWN
10893	MMP24	matrix metallopeptidase 24 (membrane-inserted)								AACTTT_UNKNOWN
23492	CBX7	chromobox homolog 7								AACTTT_UNKNOWN
79443	FYCO1	FYVE and coiled-coil domain containing 1								AACTTT_UNKNOWN
27347	STK39	serine threonine kinase 39								AACTTT_UNKNOWN
403313	PPAPDC2	phosphatidic acid phosphatase type 2 domain containing 2								AACTTT_UNKNOWN
9133	CCNB2	cyclin B2								AACTTT_UNKNOWN
4931	NVL	nuclear VCP-like								AACTTT_UNKNOWN
79608	RIC3	resistance to inhibitors of cholinesterase 3 homolog (C. elegans)								AACTTT_UNKNOWN
3356	HTR2A	5-hydroxytryptamine (serotonin) receptor 2A								AACTTT_UNKNOWN
146433	IL34	interleukin 34									CAGCTG_AP4_Q5	CTGCAGY_UNKNOWN
27153	ZNF777	zinc finger protein 777									CAGCTG_AP4_Q5	CTGCAGY_UNKNOWN
9240	PNMA1	paraneoplastic antigen MA1									CAGCTG_AP4_Q5
30818	KCNIP3	Kv channel interacting protein 3, calsenilin									CAGCTG_AP4_Q5
1436	CSF1R	colony stimulating factor 1 receptor									CAGCTG_AP4_Q5
23417	MLYCD	malonyl-CoA decarboxylase									CAGCTG_AP4_Q5
4493	MT1E	metallothionein 1E									CAGCTG_AP4_Q5
222962	SLC29A4	solute carrier family 29 (nucleoside transporters), member 4									CAGCTG_AP4_Q5
10536	LEPREL2	leprecan-like 2									CAGCTG_AP4_Q5
118442	GPR62	G protein-coupled receptor 62									CAGCTG_AP4_Q5
79007	DBNDD1	dysbindin (dystrobrevin binding protein 1) domain containing 1									CAGCTG_AP4_Q5
51006	SLC35C2	solute carrier family 35, member C2									CAGCTG_AP4_Q5
528	ATP6V1C1	ATPase, H+ transporting, lysosomal 42kDa, V1 subunit C1									CAGCTG_AP4_Q5
6773	STAT2	signal transducer and activator of transcription 2, 113kDa									CAGCTG_AP4_Q5
27175	TUBG2	tubulin, gamma 2									CAGCTG_AP4_Q5
8291	DYSF	dysferlin, limb girdle muscular dystrophy 2B (autosomal recessive)									CAGCTG_AP4_Q5
9805	SCRN1	secernin 1									CAGCTG_AP4_Q5
6059	ABCE1	ATP-binding cassette, sub-family E (OABP), member 1									CAGCTG_AP4_Q5
10858	CYP46A1	cytochrome P450, family 46, subfamily A, polypeptide 1									CAGCTG_AP4_Q5
113177	IZUMO4	IZUMO family member 4									CAGCTG_AP4_Q5
9211	LGI1	leucine-rich, glioma inactivated 1									CAGCTG_AP4_Q5
50485	SMARCAL1	SWI/SNF related, matrix associated, actin dependent regulator of chromatin, subfamily a-like 1									CAGCTG_AP4_Q5
1621	DBH	dopamine beta-hydroxylase (dopamine beta-monooxygenase)									CAGCTG_AP4_Q5
4796	TONSL	tonsoku-like, DNA repair protein									CAGCTG_AP4_Q5
51533	PHF7	PHD finger protein 7									CAGCTG_AP4_Q5
8314	BAP1	BRCA1 associated protein-1 (ubiquitin carboxy-terminal hydrolase)									CAGCTG_AP4_Q5
27343	POLL	polymerase (DNA directed), lambda									CAGCTG_AP4_Q5
5191	PEX7	peroxisomal biogenesis factor 7									CAGCTG_AP4_Q5
5371	PML	promyelocytic leukemia									CAGCTG_AP4_Q5
495	ATP4A	ATPase, H+/K+ exchanging, alpha polypeptide									CAGCTG_AP4_Q5
10763	NES	nestin									CAGCTG_AP4_Q5
11240	PADI2	peptidyl arginine deiminase, type II									CAGCTG_AP4_Q5
29998	GLTSCR1	glioma tumor suppressor candidate region gene 1									CAGCTG_AP4_Q5
3361	HTR5A	5-hydroxytryptamine (serotonin) receptor 5A									CAGCTG_AP4_Q5
9325	TRIP4	thyroid hormone receptor interactor 4									CAGCTG_AP4_Q5
6509	SLC1A4	solute carrier family 1 (glutamate/neutral amino acid transporter), member 4									CAGCTG_AP4_Q5
339145	FAM92B	family with sequence similarity 92, member B									CAGCTG_AP4_Q5
115286	SLC25A26	solute carrier family 25, member 26									CAGCTG_AP4_Q5
65059	RAPH1	Ras association (RalGDS/AF-6) and pleckstrin homology domains 1										CTGCAGY_UNKNOWN
2893	GRIA4	glutamate receptor, ionotrophic, AMPA 4										CTGCAGY_UNKNOWN
4709	NDUFB3	NADH dehydrogenase (ubiquinone) 1 beta subcomplex, 3, 12kDa										CTGCAGY_UNKNOWN
23136	EPB41L3	erythrocyte membrane protein band 4.1-like 3										CTGCAGY_UNKNOWN
23098	SARM1	sterile alpha and TIR motif containing 1										CTGCAGY_UNKNOWN
10376	TUBA1B	tubulin, alpha 1b										CTGCAGY_UNKNOWN
120379	PIH1D2	PIH1 domain containing 2										CTGCAGY_UNKNOWN
6638	SNRPN	small nuclear ribonucleoprotein polypeptide N										CTGCAGY_UNKNOWN
149371	EXOC8	exocyst complex component 8										CTGCAGY_UNKNOWN
91683	SYT12	synaptotagmin XII										CTGCAGY_UNKNOWN
56997	ADCK3	aarF domain containing kinase 3										CTGCAGY_UNKNOWN
23582	CCNDBP1	cyclin D-type binding-protein 1										CTGCAGY_UNKNOWN
55004	LAMTOR1	late endosomal/lysosomal adaptor, MAPK and MTOR activator 1										CTGCAGY_UNKNOWN
56121	PCDHB15	protocadherin beta 15										CTGCAGY_UNKNOWN
4747	NEFL	neurofilament, light polypeptide										CTGCAGY_UNKNOWN
9619	ABCG1	ATP-binding cassette, sub-family G (WHITE), member 1										CTGCAGY_UNKNOWN
2997	GYS1	glycogen synthase 1 (muscle)										CTGCAGY_UNKNOWN
256281	NUDT14	nudix (nucleoside diphosphate linked moiety X)-type motif 14										CTGCAGY_UNKNOWN
56124	PCDHB12	protocadherin beta 12										CTGCAGY_UNKNOWN
7070	THY1	Thy-1 cell surface antigen										CTGCAGY_UNKNOWN
1318	SLC31A2	solute carrier family 31 (copper transporters), member 2
66008	TRAK2	trafficking protein, kinesin binding 2
79969	ATAT1	alpha tubulin acetyltransferase 1
91653	BOC	Boc homolog (mouse)
26122	EPC2	enhancer of polycomb homolog 2 (Drosophila)
55228	PNMAL1	PNMA-like 1
90204	ZSWIM1	zinc finger, SWIM-type containing 1
29993	PACSIN1	protein kinase C and casein kinase substrate in neurons 1
7181	NR2C1	nuclear receptor subfamily 2, group C, member 1
5876	RABGGTB	Rab geranylgeranyltransferase, beta subunit
222068	TMED4	transmembrane emp24 protein transport domain containing 4
64223	MLST8	MTOR associated protein, LST8 homolog (S. cerevisiae)
415116	PIM3	pim-3 oncogene
7171	TPM4	tropomyosin 4
84085	FBXO30	F-box protein 30
148252	DIRAS1	DIRAS family, GTP-binding RAS-like 1
150465	TTL	tubulin tyrosine ligase
23129	PLXND1	plexin D1
10999	SLC27A4	solute carrier family 27 (fatty acid transporter), member 4
51277	DNAJC27	DnaJ (Hsp40) homolog, subfamily C, member 27
55715	DOK4	docking protein 4
107	ADCY1	adenylate cyclase 1 (brain)
51286	CEND1	cell cycle exit and neuronal differentiation 1
9780	PIEZO1	piezo-type mechanosensitive ion channel component 1
5464	PPA1	pyrophosphatase (inorganic) 1
84699	CREB3L3	cAMP responsive element binding protein 3-like 3
84334	APOPT1	apoptogenic 1
38	ACAT1	acetyl-CoA acetyltransferase 1
7991	TUSC3	tumor suppressor candidate 3
774	CACNA1B	calcium channel, voltage-dependent, N type, alpha 1B subunit
1489	CTF1	cardiotrophin 1
114823	LENG8	leukocyte receptor cluster (LRC) member 8
9774	BCLAF1	BCL2-associated transcription factor 1
91107	TRIM47	tripartite motif containing 47
9950	GOLGA5	golgin A5
150472	CBWD2	COBW domain containing 2
25809	TTLL1	tubulin tyrosine ligase-like family, member 1
283212	KLHL35	kelch-like 35 (Drosophila)
857	CAV1	caveolin 1, caveolae protein, 22kDa
51642	MRPL48	mitochondrial ribosomal protein L48
342125	TMC3	transmembrane channel-like 3
114898	C1QTNF2	C1q and tumor necrosis factor related protein 2
2356	FPGS	folylpolyglutamate synthase
7053	TGM3	transglutaminase 3 (E polypeptide, protein-glutamine-gamma-glutamyltransferase)
63929	XPNPEP3	X-prolyl aminopeptidase (aminopeptidase P) 3, putative
10744	PTTG2	pituitary tumor-transforming 2
93010	B3GNT7	UDP-GlcNAc:betaGal beta-1,3-N-acetylglucosaminyltransferase 7
55907	CMAS	cytidine monophosphate N-acetylneuraminic acid synthetase
55700	MAP7D1	MAP7 domain containing 1
23051	ZHX3	zinc fingers and homeoboxes 3
3059	HCLS1	hematopoietic cell-specific Lyn substrate 1
57381	RHOJ	ras homolog gene family, member J
4064	CD180	CD180 molecule
9069	CLDN12	claudin 12
4067	LYN	v-yes-1 Yamaguchi sarcoma viral related oncogene homolog
51703	ACSL5	acyl-CoA synthetase long-chain family member 5
130271	PLEKHH2	pleckstrin homology domain containing, family H (with MyTH4 domain) member 2
114926	C8orf40	chromosome 8 open reading frame 40
84817	TXNDC17	thioredoxin domain containing 17
218	ALDH3A1	aldehyde dehydrogenase 3 family, member A1
92822	ZNF276	zinc finger protein 276
79570	NKAIN1	Na+/K+ transporting ATPase interacting 1
6575	SLC20A2	solute carrier family 20 (phosphate transporter), member 2
4299	AFF1	AF4/FMR2 family, member 1
22918	CD93	CD93 molecule
1524	CX3CR1	chemokine (C-X3-C motif) receptor 1
25927	CNRIP1	cannabinoid receptor interacting protein 1
1725	DHPS	deoxyhypusine synthase
83878	USHBP1	Usher syndrome 1C binding protein 1
10528	NOP56	NOP56 ribonucleoprotein homolog (yeast)
6309	SC5DL	sterol-C5-desaturase (ERG3 delta-5-desaturase homolog, S. cerevisiae)-like
64782	AEN	apoptosis enhancing nuclease
3995	FADS3	fatty acid desaturase 3
9204	ZMYM6	zinc finger, MYM-type 6
8722	CTSF	cathepsin F
93436	ARMC6	armadillo repeat containing 6
10645	CAMKK2	calcium/calmodulin-dependent protein kinase kinase 2, beta
84656	GLYR1	glyoxylate reductase 1 homolog (Arabidopsis)
6574	SLC20A1	solute carrier family 20 (phosphate transporter), member 1
23521	RPL13A	ribosomal protein L13a
9811	CTIF	CBP80/20-dependent translation initiation factor
4817	NIT1	nitrilase 1
6205	RPS11	ribosomal protein S11
9343	EFTUD2	elongation factor Tu GTP binding domain containing 2
51264	MRPL27	mitochondrial ribosomal protein L27
79922	MRM1	mitochondrial rRNA methyltransferase 1 homolog (S. cerevisiae)
388389	CCDC103	coiled-coil domain containing 103
53919	SLCO1C1	solute carrier organic anion transporter family, member 1C1
3939	LDHA	lactate dehydrogenase A
11108	PRDM4	PR domain containing 4
55638	SYBU	syntabulin (syntaxin-interacting)
25996	REXO2	REX2, RNA exonuclease 2 homolog (S. cerevisiae)
10669	CGREF1	cell growth regulator with EF-hand domain 1
5883	RAD9A	RAD9 homolog A (S. pombe)
4171	MCM2	minichromosome maintenance complex component 2
151648	SGOL1	shugoshin-like 1 (S. pombe)
84572	GNPTG	N-acetylglucosamine-1-phosphate transferase, gamma subunit
5591	PRKDC	protein kinase, DNA-activated, catalytic polypeptide
10347	ABCA7	ATP-binding cassette, sub-family A (ABC1), member 7
11264	PXMP4	peroxisomal membrane protein 4, 24kDa
57405	SPC25	SPC25, NDC80 kinetochore complex component, homolog (S. cerevisiae)
6999	TDO2	tryptophan 2,3-dioxygenase
699	BUB1	budding uninhibited by benzimidazoles 1 homolog (yeast)
7353	UFD1L	ubiquitin fusion degradation 1 like (yeast)
22974	TPX2	TPX2, microtubule-associated, homolog (Xenopus laevis)
10314	LANCL1	LanC lantibiotic synthetase component C-like 1 (bacterial)
7069	THRSP	thyroid hormone responsive
51409	HEMK1	HemK methyltransferase family member 1
92815	HIST3H2A	histone cluster 3, H2a
9493	KIF23	kinesin family member 23
4728	NDUFS8	NADH dehydrogenase (ubiquinone) Fe-S protein 8, 23kDa (NADH-coenzyme Q reductase)
3712	IVD	isovaleryl-CoA dehydrogenase
245711	SPDYA	speedy homolog A (Xenopus laevis)
92797	HELB	helicase (DNA) B
3134	HLA-F	major histocompatibility complex, class I, F
90624	LYRM7	Lyrm7 homolog (mouse)
92703	TMEM183A	transmembrane protein 183A
10229	COQ7	coenzyme Q7 homolog, ubiquinone (yeast)
11153	FICD	FIC domain containing
54938	SARS2	seryl-tRNA synthetase 2, mitochondrial
84900	RNFT2	ring finger protein, transmembrane 2
23087	TRIM35	tripartite motif containing 35
23299	BICD2	bicaudal D homolog 2 (Drosophila)
50814	NSDHL	NAD(P) dependent steroid dehydrogenase-like
54478	FAM64A	family with sequence similarity 64, member A
55764	IFT122	intraflagellar transport 122 homolog (Chlamydomonas)
84940	CORO6	coronin 6
338692	ANKRD13D	ankyrin repeat domain 13 family, member D
8576	STK16	serine/threonine kinase 16
2888	GRB14	growth factor receptor-bound protein 14
1132	CHRM4	cholinergic receptor, muscarinic 4
157753	TMEM74	transmembrane protein 74
283446	MYO1H	myosin IH
91012	CERS5	ceramide synthase 5
8683	SRSF9	serine/arginine-rich splicing factor 9
8569	MKNK1	MAP kinase interacting serine/threonine kinase 1
3161	HMMR	hyaluronan-mediated motility receptor (RHAMM)
57539	WDR35	WD repeat domain 35
23741	EID1	EP300 interacting inhibitor of differentiation 1
119504	ANAPC16	anaphase promoting complex subunit 16
79172	CENPO	centromere protein O
10467	ZNHIT1	zinc finger, HIT-type containing 1
8985	PLOD3	procollagen-lysine, 2-oxoglutarate 5-dioxygenase 3
55345	C4orf21	chromosome 4 open reading frame 21
115024	NT5C3L	5'-nucleotidase, cytosolic III-like
154791	C7orf55	chromosome 7 open reading frame 55
126272	EID2B	EP300 interacting inhibitor of differentiation 2B
55757	UGGT2	UDP-glucose glycoprotein glucosyltransferase 2
55248	TMEM206	transmembrane protein 206
11169	WDHD1	WD repeat and HMG-box DNA binding protein 1
257415	FAM133B	family with sequence similarity 133, member B
54859	C3orf75	chromosome 3 open reading frame 75
11214	AKAP13	A kinase (PRKA) anchor protein 13
10898	CPSF4	cleavage and polyadenylation specific factor 4, 30kDa
11340	EXOSC8	exosome component 8
3836	KPNA1	karyopherin alpha 1 (importin alpha 5)
539	ATP5O	ATP synthase, H+ transporting, mitochondrial F1 complex, O subunit
78992	YIPF2	Yip1 domain family, member 2
90580	C19orf52	chromosome 19 open reading frame 52
125476	INO80C	INO80 complex subunit C
54826	GIN1	gypsy retrotransposon integrase 1
114822	RHPN1	rhophilin, Rho GTPase binding protein 1
4085	MAD2L1	MAD2 mitotic arrest deficient-like 1 (yeast)
57692	MAGEE1	melanoma antigen family E, 1
7390	UROS	uroporphyrinogen III synthase
8089	YEATS4	YEATS domain containing 4
6241	RRM2	ribonucleotide reductase M2
23762	OSBP2	oxysterol binding protein 2
1463	NCAN	neurocan
122042	RXFP2	relaxin/insulin-like family peptide receptor 2
66004	LYNX1	Ly6/neurotoxin 1
4830	NME1	non-metastatic cells 1, protein (NM23A) expressed in
83468	GLT8D2	glycosyltransferase 8 domain containing 2
140612	ZFP28	zinc finger protein 28 homolog (mouse)
8682	PEA15	phosphoprotein enriched in astrocytes 15
1200	TPP1	tripeptidyl peptidase I
339665	SLC35E4	solute carrier family 35, member E4
57549	IGSF9	immunoglobulin superfamily, member 9
54629	FAM63B	family with sequence similarity 63, member B
204962	SLC44A5	solute carrier family 44, member 5
3038	HAS3	hyaluronan synthase 3
83732	RIOK1	RIO kinase 1 (yeast)
79912	PYROXD1	pyridine nucleotide-disulphide oxidoreductase domain 1
23596	OPN3	opsin 3
5160	PDHA1	pyruvate dehydrogenase (lipoamide) alpha 1
10052	GJC1	gap junction protein, gamma 1, 45kDa
5287	PIK3C2B	phosphoinositide-3-kinase, class 2, beta polypeptide
79139	DERL1	Der1-like domain family, member 1
55101	ATP5SL	ATP5S-like
80119	PIF1	PIF1 5'-to-3' DNA helicase homolog (S. cerevisiae)
131831	FAM194A	family with sequence similarity 194, member A
57110	HRASLS	HRAS-like suppressor
196264	MPZL3	myelin protein zero-like 3
4430	MYO1B	myosin IB
80332	ADAM33	ADAM metallopeptidase domain 33
3984	LIMK1	LIM domain kinase 1
283742	FAM98B	family with sequence similarity 98, member B
88455	ANKRD13A	ankyrin repeat domain 13A
117248	GALNTL2	UDP-N-acetyl-alpha-D-galactosamine:polypeptide N-acetylgalactosaminyltransferase-like 2
3857	KRT9	keratin 9
126308	MOB3A	MOB kinase activator 3A
22800	RRAS2	related RAS viral (r-ras) oncogene homolog 2
79627	OGFRL1	opioid growth factor receptor-like 1
55591	VEZT	vezatin, adherens junctions transmembrane protein
54463	FAM134B	family with sequence similarity 134, member B
5923	RASGRF1	Ras protein-specific guanine nucleotide-releasing factor 1
23519	ANP32D	acidic (leucine-rich) nuclear phosphoprotein 32 family, member D
825	CAPN3	calpain 3, (p94)
5256	PHKA2	phosphorylase kinase, alpha 2 (liver)
5224	PGAM2	phosphoglycerate mutase 2 (muscle)
23287	AGTPBP1	ATP/GTP binding protein 1
9330	GTF3C3	general transcription factor IIIC, polypeptide 3, 102kDa
55051	C14orf102	chromosome 14 open reading frame 102
4350	MPG	N-methylpurine-DNA glycosylase
51375	SNX7	sorting nexin 7
10178	ODZ1	odz, odd Oz/ten-m homolog 1 (Drosophila)
202333	CMYA5	cardiomyopathy associated 5
6532	SLC6A4	solute carrier family 6 (neurotransmitter transporter, serotonin), member 4
54981	C9orf95	chromosome 9 open reading frame 95
5954	RCN1	reticulocalbin 1, EF-hand calcium binding domain
3702	ITK	IL2-inducible T-cell kinase
94015	TTYH2	tweety homolog 2 (Drosophila)
79591	C10orf76	chromosome 10 open reading frame 76
306	ANXA3	annexin A3
5979	RET	ret proto-oncogene
55711	FAR2	fatty acyl CoA reductase 2
63027	SLC22A23	solute carrier family 22, member 23
140609	NEK7	NIMA (never in mitosis gene a)-related kinase 7
123016	TTC8	tetratricopeptide repeat domain 8
1289	COL5A1	collagen, type V, alpha 1
319101	KRT73	keratin 73
4653	MYOC	myocilin, trabecular meshwork inducible glucocorticoid response
1938	EEF2	eukaryotic translation elongation factor 2
55872	PBK	PDZ binding kinase
10637	LEFTY1	left-right determination factor 1
401036	ASB18	ankyrin repeat and SOCS box containing 18
54205	CYCS	cytochrome c, somatic
1129	CHRM2	cholinergic receptor, muscarinic 2
221302	ZUFSP	zinc finger with UFM1-specific peptidase domain
4759	NEU2	sialidase 2 (cytosolic sialidase)
54842	MFSD6	major facilitator superfamily domain containing 6
8504	PEX3	peroxisomal biogenesis factor 3
23270	TSPYL4	TSPY-like 4
116238	TLCD1	TLC domain containing 1
9538	EI24	etoposide induced 2.4 mRNA
25791	NGEF	neuronal guanine nucleotide exchange factor
2180	ACSL1	acyl-CoA synthetase long-chain family member 1
4147	MATN2	matrilin 2
8800	PEX11A	peroxisomal biogenesis factor 11 alpha
10206	TRIM13	tripartite motif containing 13
9027	NAT8	N-acetyltransferase 8 (GCN5-related, putative)
343450	KCNT2	potassium channel, subfamily T, member 2
9804	TOMM20	translocase of outer mitochondrial membrane 20 homolog (yeast)
92370	ACPL2	acid phosphatase-like 2
219621	C10orf107	chromosome 10 open reading frame 107
823	CAPN1	calpain 1, (mu/I) large subunit
5478	PPIA	peptidylprolyl isomerase A (cyclophilin A)
65990	FAM173A	family with sequence similarity 173, member A
58986	TMEM8A	transmembrane protein 8A
5570	PKIB	protein kinase (cAMP-dependent, catalytic) inhibitor beta
284131	ENDOV	endonuclease V
9836	LCMT2	leucine carboxyl methyltransferase 2
8678	BECN1	beclin 1, autophagy related
55165	CEP55	centrosomal protein 55kDa
4637	MYL6	myosin, light chain 6, alkali, smooth muscle and non-muscle
80169	CTC1	CTS telomere maintenance complex component 1
79169	C1orf35	chromosome 1 open reading frame 35
11097	NUPL2	nucleoporin like 2
55846	ITFG2	integrin alpha FG-GAP repeat containing 2
57082	CASC5	cancer susceptibility candidate 5
57106	NAT14	N-acetyltransferase 14 (GCN5-related, putative)
5903	RANBP2	RAN binding protein 2
59349	KLHL12	kelch-like 12 (Drosophila)
51231	VRK3	vaccinia related kinase 3
55120	FANCL	Fanconi anemia, complementation group L
83544	DNAL1	dynein, axonemal, light chain 1
27235	COQ2	coenzyme Q2 homolog, prenyltransferase (yeast)
53343	NUDT9	nudix (nucleoside diphosphate linked moiety X)-type motif 9
84945	ABHD13	abhydrolase domain containing 13
6908	TBP	TATA box binding protein
1716	DGUOK	deoxyguanosine kinase
51202	DDX47	DEAD (Asp-Glu-Ala-Asp) box polypeptide 47
9406	ZRANB2	zinc finger, RAN-binding domain containing 2
25904	CNOT10	CCR4-NOT transcription complex, subunit 10
55454	CSGALNACT2	chondroitin sulfate N-acetylgalactosaminyltransferase 2
55234	SMU1	smu-1 suppressor of mec-8 and unc-52 homolog (C. elegans)
28981	IFT81	intraflagellar transport 81 homolog (Chlamydomonas)
10095	ARPC1B	actin related protein 2/3 complex, subunit 1B, 41kDa
10239	AP3S2	adaptor-related protein complex 3, sigma 2 subunit
55702	CCDC94	coiled-coil domain containing 94
91949	COG7	component of oligomeric golgi complex 7
51665	ASB1	ankyrin repeat and SOCS box containing 1
54974	THG1L	tRNA-histidine guanylyltransferase 1-like (S. cerevisiae)
54977	SLC25A38	solute carrier family 25, member 38
137695	TMEM68	transmembrane protein 68
80185	TTI2	Tel2 interacting protein 2 homolog (S. pombe)
10188	TNK2	tyrosine kinase, non-receptor, 2
53339	BTBD1	BTB (POZ) domain containing 1
79036	C19orf50	chromosome 19 open reading frame 50
54856	GON4L	gon-4-like (C. elegans)
9570	GOSR2	golgi SNAP receptor complex member 2
151613	TTC14	tetratricopeptide repeat domain 14
5373	PMM2	phosphomannomutase 2
49856	WRAP73	WD repeat containing, antisense to TP73
124152	IQCK	IQ motif containing K
55738	ARFGAP1	ADP-ribosylation factor GTPase activating protein 1
192111	PGAM5	phosphoglycerate mutase family member 5
26750	RPS6KC1	ribosomal protein S6 kinase, 52kDa, polypeptide 1
6742	SSBP1	single-stranded DNA binding protein 1
6905	TBCE	tubulin folding cofactor E
23568	ARL2BP	ADP-ribosylation factor-like 2 binding protein
3776	KCNK2	potassium channel, subfamily K, member 2
408	ARRB1	arrestin, beta 1
150737	TTC30B	tetratricopeptide repeat domain 30B
79745	CLIP4	CAP-GLY domain containing linker protein family, member 4
220108	FAM124A	family with sequence similarity 124A
128989	C22orf25	chromosome 22 open reading frame 25
85439	STON2	stonin 2
199	AIF1	allograft inflammatory factor 1
4868	NPHS1	nephrosis 1, congenital, Finnish type (nephrin)
63899	NSUN3	NOP2/Sun domain family, member 3
64780	MICAL1	microtubule associated monoxygenase, calponin and LIM domain containing 1
283209	PGM2L1	phosphoglucomutase 2-like 1
54942	FAM206A	family with sequence similarity 206, member A
51227	PIGP	phosphatidylinositol glycan anchor biosynthesis, class P
8266	UBL4A	ubiquitin-like 4A
164592	CCDC116	coiled-coil domain containing 116
285343	C3orf23	chromosome 3 open reading frame 23
84264	HAGHL	hydroxyacylglutathione hydrolase-like
64145	ZFYVE20	zinc finger, FYVE domain containing 20
259232	NALCN	sodium leak channel, non-selective
119587	CPXM2	carboxypeptidase X (M14 family), member 2
8911	CACNA1I	calcium channel, voltage-dependent, T type, alpha 1I subunit
51228	GLTP	glycolipid transfer protein
133015	PACRGL	PARK2 co-regulated-like
112487	C14orf126	chromosome 14 open reading frame 126
1062	CENPE	centromere protein E, 312kDa
8220	DGCR14	DiGeorge syndrome critical region gene 14
81611	ANP32E	acidic (leucine-rich) nuclear phosphoprotein 32 family, member E
5901	RAN	RAN, member RAS oncogene family
10484	SEC23A	Sec23 homolog A (S. cerevisiae)
11332	ACOT7	acyl-CoA thioesterase 7
10575	CCT4	chaperonin containing TCP1, subunit 4 (delta)
21	ABCA3	ATP-binding cassette, sub-family A (ABC1), member 3
64130	LIN7B	lin-7 homolog B (C. elegans)
10815	CPLX1	complexin 1
170261	ZCCHC12	zinc finger, CCHC domain containing 12
56521	DNAJC12	DnaJ (Hsp40) homolog, subfamily C, member 12
27148	STK36	serine/threonine kinase 36
10675	CSPG5	chondroitin sulfate proteoglycan 5 (neuroglycan C)
4199	ME1	malic enzyme 1, NADP(+)-dependent, cytosolic
4135	MAP6	microtubule-associated protein 6
144195	SLC2A14	solute carrier family 2 (facilitated glucose transporter), member 14
162239	ZFP1	zinc finger protein 1 homolog (mouse)
285282	RABL3	RAB, member of RAS oncogene family-like 3
116541	MRPL54	mitochondrial ribosomal protein L54
119710	C11orf74	chromosome 11 open reading frame 74
7593	MZF1	myeloid zinc finger 1
123803	NTAN1	N-terminal asparagine amidase
55663	ZNF446	zinc finger protein 446
84153	RNASEH2C	ribonuclease H2, subunit C
5641	LGMN	legumain
64897	C12orf43	chromosome 12 open reading frame 43
374454	KRT77	keratin 77
81619	TSPAN14	tetraspanin 14
26762	HAVCR1	hepatitis A virus cellular receptor 1
8034	SLC25A16	solute carrier family 25 (mitochondrial carrier; Graves disease autoantigen), member 16
2030	SLC29A1	solute carrier family 29 (nucleoside transporters), member 1
126789	PUSL1	pseudouridylate synthase-like 1
2060	EPS15	epidermal growth factor receptor pathway substrate 15
58504	ARHGAP22	Rho GTPase activating protein 22
57150	C6orf162	chromosome 6 open reading frame 162
134353	LSM11	LSM11, U7 small nuclear RNA associated
670	BPHL	biphenyl hydrolase-like (serine hydrolase)
91544	UBXN11	UBX domain protein 11
259266	ASPM	asp (abnormal spindle) homolog, microcephaly associated (Drosophila)
9787	DLGAP5	discs, large (Drosophila) homolog-associated protein 5
9516	LITAF	lipopolysaccharide-induced TNF factor
23597	ACOT9	acyl-CoA thioesterase 9
84286	TMEM175	transmembrane protein 175
3340	NDST1	N-deacetylase/N-sulfotransferase (heparan glucosaminyl) 1
8500	PPFIA1	protein tyrosine phosphatase, receptor type, f polypeptide (PTPRF), interacting protein (liprin), alpha 1
4837	NNMT	nicotinamide N-methyltransferase
2664	GDI1	GDP dissociation inhibitor 1
83787	ARMC10	armadillo repeat containing 10
90353	CTU1	cytosolic thiouridylase subunit 1 homolog (S. pombe)
55069	C7orf42	chromosome 7 open reading frame 42
8814	CDKL1	cyclin-dependent kinase-like 1 (CDC2-related kinase)
401498	TMEM215	transmembrane protein 215
91647	ATPAF2	ATP synthase mitochondrial F1 complex assembly factor 2
3071	NCKAP1L	NCK-associated protein 1-like
5898	RALA	v-ral simian leukemia viral oncogene homolog A (ras related)
4952	OCRL	oculocerebrorenal syndrome of Lowe
2621	GAS6	growth arrest-specific 6
349565	NMNAT3	nicotinamide nucleotide adenylyltransferase 3
144455	E2F7	E2F transcription factor 7
115353	LRRC42	leucine rich repeat containing 42
57231	SNX14	sorting nexin 14
11194	ABCB8	ATP-binding cassette, sub-family B (MDR/TAP), member 8
1212	CLTB	clathrin, light chain B
1528	CYB5A	cytochrome b5 type A (microsomal)
145553	MDP1	magnesium-dependent phosphatase 1
10025	MED16	mediator complex subunit 16
196441	ZFC3H1	zinc finger, C3H1-type containing
83591	THAP2	THAP domain containing, apoptosis associated protein 2
8536	CAMK1	calcium/calmodulin-dependent protein kinase I
84193	SETD3	SET domain containing 3
219293	ATAD3C	ATPase family, AAA domain containing 3C
51008	ASCC1	activating signal cointegrator 1 complex subunit 1
285800	PRR18	proline rich 18
339416	ANKRD45	ankyrin repeat domain 45
131870	NUDT16	nudix (nucleoside diphosphate linked moiety X)-type motif 16
59285	CACNG6	calcium channel, voltage-dependent, gamma subunit 6
9554	SEC22B	SEC22 vesicle trafficking protein homolog B (S. cerevisiae) (gene/pseudogene)
83862	TMEM120A	transmembrane protein 120A
55922	NKRF	NFKB repressing factor
283232	TMEM80	transmembrane protein 80
2781	GNAZ	guanine nucleotide binding protein (G protein), alpha z polypeptide
9715	FAM131B	family with sequence similarity 131, member B
7466	WFS1	Wolfram syndrome 1 (wolframin)
9450	LY86	lymphocyte antigen 86
23424	TDRD7	tudor domain containing 7
29940	DSE	dermatan sulfate epimerase
631	BFSP1	beaded filament structural protein 1, filensin
147948	ZNF582	zinc finger protein 582
10269	ZMPSTE24	zinc metallopeptidase (STE24 homolog, S. cerevisiae)
1466	CSRP2	cysteine and glycine-rich protein 2
7915	ALDH5A1	aldehyde dehydrogenase 5 family, member A1
126823	KLHDC9	kelch domain containing 9
92002	FAM58A	family with sequence similarity 58, member A
51177	PLEKHO1	pleckstrin homology domain containing, family O member 1
81567	TXNDC5	thioredoxin domain containing 5 (endoplasmic reticulum)
9783	RIMS3	regulating synaptic membrane exocytosis 3
8706	B3GALNT1	beta-1,3-N-acetylgalactosaminyltransferase 1 (globoside blood group)
119032	C10orf32	chromosome 10 open reading frame 32
9472	AKAP6	A kinase (PRKA) anchor protein 6
25855	BRMS1	breast cancer metastasis suppressor 1
151393	FAM82A1	family with sequence similarity 82, member A1
64077	LHPP	phospholysine phosphohistidine inorganic pyrophosphate phosphatase
1282	COL4A1	collagen, type IV, alpha 1
1284	COL4A2	collagen, type IV, alpha 2
1315	COPB1	coatomer protein complex, subunit beta 1
23113	CUL9	cullin 9
196951	C15orf33	chromosome 15 open reading frame 33
91754	NEK9	NIMA (never in mitosis gene a)- related kinase 9
84678	KDM2B	lysine (K)-specific demethylase 2B
123745	PLA2G4E	phospholipase A2, group IVE
8216	LZTR1	leucine-zipper-like transcription regulator 1
246213	SLC17A8	solute carrier family 17 (sodium-dependent inorganic phosphate cotransporter), member 8
5538	PPT1	palmitoyl-protein thioesterase 1
55526	DHTKD1	dehydrogenase E1 and transketolase domain containing 1
2821	GPI	glucose-6-phosphate isomerase
145942	TMCO5A	transmembrane and coiled-coil domains 5A
122773	KLHDC1	kelch domain containing 1
2548	GAA	glucosidase, alpha; acid
93589	CACNA2D4	calcium channel, voltage-dependent, alpha 2/delta subunit 4
90268	FAM105B	family with sequence similarity 105, member B
583	BBS2	Bardet-Biedl syndrome 2
124995	MRPL10	mitochondrial ribosomal protein L10
8100	IFT88	intraflagellar transport 88 homolog (Chlamydomonas)
146279	TEKT5	tektin 5
221120	ALKBH3	alkB, alkylation repair homolog 3 (E. coli)
154881	KCTD7	potassium channel tetramerisation domain containing 7
4172	MCM3	minichromosome maintenance complex component 3
25957	PNISR	PNN-interacting serine/arginine-rich protein
93974	ATPIF1	ATPase inhibitory factor 1
84326	C16orf13	chromosome 16 open reading frame 13
891	CCNB1	cyclin B1
11133	KPTN	kaptin (actin binding protein)
57455	REXO1	REX1, RNA exonuclease 1 homolog (S. cerevisiae)
79738	BBS10	Bardet-Biedl syndrome 10
10279	PRSS16	protease, serine, 16 (thymus)
57101	ANO2	anoctamin 2
51016	FAM158A	family with sequence similarity 158, member A
2173	FABP7	fatty acid binding protein 7, brain
9375	TM9SF2	transmembrane 9 superfamily member 2
246181	AKR7L	aldo-keto reductase family 7-like
342538	NACA2	nascent polypeptide-associated complex alpha subunit 2
57698	KIAA1598	KIAA1598
57798	GATAD1	GATA zinc finger domain containing 1
10618	TGOLN2	trans-golgi network protein 2
5244	ABCB4	ATP-binding cassette, sub-family B (MDR/TAP), member 4
3592	IL12A	interleukin 12A (natural killer cell stimulatory factor 1, cytotoxic lymphocyte maturation factor 1, p35)
164091	PAQR7	progestin and adipoQ receptor family member VII
55082	ARGLU1	arginine and glutamate rich 1
2037	EPB41L2	erythrocyte membrane protein band 4.1-like 2
93210	PGAP3	post-GPI attachment to proteins 3
116369	SLC26A8	solute carrier family 26, member 8
2581	GALC	galactosylceramidase
387694	SH2D4B	SH2 domain containing 4B
713	C1QB	complement component 1, q subcomponent, B chain
23567	ZNF346	zinc finger protein 346
340351	AGBL3	ATP/GTP binding protein-like 3
57017	COQ9	coenzyme Q9 homolog (S. cerevisiae)
7419	VDAC3	voltage-dependent anion channel 3
80152	CENPT	centromere protein T
3832	KIF11	kinesin family member 11
83593	RASSF5	Ras association (RalGDS/AF-6) domain family member 5
223075	CCDC129	coiled-coil domain containing 129
7086	TKT	transketolase
4017	LOXL2	lysyl oxidase-like 2
9752	PCDHA9	protocadherin alpha 9
2593	GAMT	guanidinoacetate N-methyltransferase
56666	PANX2	pannexin 2
1573	CYP2J2	cytochrome P450, family 2, subfamily J, polypeptide 2
7189	TRAF6	TNF receptor-associated factor 6
5073	PARN	poly(A)-specific ribonuclease
56145	PCDHA3	protocadherin alpha 3
80709	AKNA	AT-hook transcription factor
9790	BMS1	BMS1 homolog, ribosome assembly protein (yeast)
10001	MED6	mediator complex subunit 6
100128338	LOC100128338	uncharacterized LOC100128338
100130890	LOC100130890	uncharacterized LOC100130890
100130988	C7orf72	chromosome 7 open reading frame 72
100131827	ZNF717	zinc finger protein 717
100131897	FAM196B	family with sequence similarity 196, member B
100170841	C17orf96	chromosome 17 open reading frame 96
100271715	ARHGEF33	Rho guanine nucleotide exchange factor (GEF) 33
100271927	RASA4B	RAS p21 protein activator 4B
100507003	LOC100507003	uncharacterized protein LOC100507003
100526771	LOC100526771	uncharacterized LOC100526771
100526835	FPGT-TNNI3K	FPGT-TNNI3K readthrough
10060	ABCC9	ATP-binding cassette, sub-family C (CFTR/MRP), member 9
10069	RWDD2B	RWD domain containing 2B
10116	FEM1B	fem-1 homolog b (C. elegans)
10208	USPL1	ubiquitin specific peptidase like 1
10227	MFSD10	major facilitator superfamily domain containing 10
10251	SPRY3	sprouty homolog 3 (Drosophila)
10254	STAM2	signal transducing adaptor molecule (SH3 domain and ITAM motif) 2
102800317		&nbsp;
10293	TRAIP	TRAF interacting protein
10309	CCNO	cyclin O
1032	CDKN2D	cyclin-dependent kinase inhibitor 2D (p19, inhibits CDK4)
10328	COX4NB	COX4 neighbor
10336	PCGF3	polycomb group ring finger 3
10383	TUBB4B	tubulin, beta 4B class IVb
1039	CDR2	cerebellar degeneration-related protein 2, 62kDa
10402	ST3GAL6	ST3 beta-galactoside alpha-2,3-sialyltransferase 6
10434	LYPLA1	lysophospholipase I
[truncated: 662 more rows]

## Sheet: C-Cortex 2941-5090
Overlap Results
Collection(s):	TFT
# overlaps shown:	10
# genesets in collections:	615
# genes in comparison (n):	1875
# genes in universe (N):	45956
Gene Set Name	# Genes in Gene Set (K)	Description	# Genes in Overlap (k)	k/K	p-value	FDR q-value
GGGCGGR_SP1_Q6	2940	Genes having at least one occurence of the highly conserved motif M6 GGGCGGR sites. The motif matches transcription factor binding site V$SP1_Q6 (v7.4 TRANSFAC).	334	0.1136	1.57e-67	9.64e-65
CAGGTG_E12_Q6	2485	Genes having at least one occurence of the highly conserved motif M12 CAGGTG sites. The motif matches transcription factor binding site V$E12_Q6 (v7.4 TRANSFAC).	298	0.1199	4.79e-65	1.47e-62
GGGAGGRR_MAZ_Q6	2274	Genes having at least one occurence of the highly conserved motif M24 GGGAGGRR sites. The motif matches transcription factor binding site V$MAZ_Q6 (v7.4 TRANSFAC).	279	0.1227	8.54e-63	1.75e-60
CTTTGT_LEF1_Q2	1972	Genes having at least one occurence of the highly conserved motif M13 CTTTGT sites. The motif matches transcription factor binding site V$LEF1_Q2 (v7.4 TRANSFAC).	239	0.1212	1.67e-52	2.57e-50
TTGTTT_FOXO4_01	2061	Genes having at least one occurence of the highly conserved motif M60 TTGTTT sites. The motif matches transcription factor binding site V$FOXO4_01 (v7.4 TRANSFAC).	239	0.116	4.38e-49	5.39e-47
SCGGAAGY_ELK1_02	1199	Genes having at least one occurence of the highly conserved motif M3 SCGGAAGY sites. The motif matches transcription factor binding site V$ELK1_02 (v7.4 TRANSFAC).	174	0.1451	1.08e-48	1.11e-46
AACTTT_UNKNOWN	1890	Genes having at least one occurence of the highly conserved motif M17 AACTTT in the region spanning up to 4 kb around their transcription start sites. The motif does not match any known transcription factor binding site (v7.4 TRANSFAC).	217	0.1148	8.94e-44	7.85e-42
GGGTGGRR_PAX4_03	1294	Genes having at least one occurence of the highly conserved motif M56 GGGTGGRR sites. The motif matches transcription factor binding site V$PAX4_03 (v7.4 TRANSFAC).	162	0.1252	3.71e-37	2.85e-35
TGGAAA_NFAT_Q4_01	1896	Genes having at least one occurence of the highly conserved motif M55 TGGAAA sites. The motif matches transcription factor binding site V$NFAT_Q4_01 (v7.4 TRANSFAC).	200	0.1055	4.53e-35	3.09e-33
CAGCTG_AP4_Q5	1524	Genes having at least one occurence of the highly conserved motif M15 CAGCTG sites. The motif matches transcription factor binding site V$AP4_Q5 (v7.4 TRANSFAC).	174	0.1142	9.73e-35	5.98e-33
Gene/Gene Set Overlap Matrix
Entrez Gene Id	Gene Symbol	Gene Description	GGGCGGR_SP1_Q6	CAGGTG_E12_Q6	GGGAGGRR_MAZ_Q6	CTTTGT_LEF1_Q2	TTGTTT_FOXO4_01	SCGGAAGY_ELK1_02	AACTTT_UNKNOWN	GGGTGGRR_PAX4_03	TGGAAA_NFAT_Q4_01	CAGCTG_AP4_Q5
10274	STAG1	stromal antigen 1	GGGCGGR_SP1_Q6	CAGGTG_E12_Q6	GGGAGGRR_MAZ_Q6	CTTTGT_LEF1_Q2	TTGTTT_FOXO4_01	SCGGAAGY_ELK1_02	AACTTT_UNKNOWN	GGGTGGRR_PAX4_03	TGGAAA_NFAT_Q4_01
9043	SPAG9	sperm associated antigen 9	GGGCGGR_SP1_Q6	CAGGTG_E12_Q6	GGGAGGRR_MAZ_Q6	CTTTGT_LEF1_Q2	TTGTTT_FOXO4_01		AACTTT_UNKNOWN	GGGTGGRR_PAX4_03	TGGAAA_NFAT_Q4_01
8463	TEAD2	TEA domain family member 2	GGGCGGR_SP1_Q6	CAGGTG_E12_Q6	GGGAGGRR_MAZ_Q6	CTTTGT_LEF1_Q2	TTGTTT_FOXO4_01		AACTTT_UNKNOWN	GGGTGGRR_PAX4_03		CAGCTG_AP4_Q5
3480	IGF1R	insulin-like growth factor 1 receptor	GGGCGGR_SP1_Q6	CAGGTG_E12_Q6	GGGAGGRR_MAZ_Q6	CTTTGT_LEF1_Q2	TTGTTT_FOXO4_01		AACTTT_UNKNOWN			CAGCTG_AP4_Q5
2118	ETV4	ets variant 4	GGGCGGR_SP1_Q6	CAGGTG_E12_Q6	GGGAGGRR_MAZ_Q6	CTTTGT_LEF1_Q2	TTGTTT_FOXO4_01		AACTTT_UNKNOWN
55806	HR	hairless homolog (mouse)	GGGCGGR_SP1_Q6	CAGGTG_E12_Q6	GGGAGGRR_MAZ_Q6	CTTTGT_LEF1_Q2	TTGTTT_FOXO4_01			GGGTGGRR_PAX4_03
1831	TSC22D3	TSC22 domain family, member 3	GGGCGGR_SP1_Q6	CAGGTG_E12_Q6	GGGAGGRR_MAZ_Q6	CTTTGT_LEF1_Q2	TTGTTT_FOXO4_01				TGGAAA_NFAT_Q4_01	CAGCTG_AP4_Q5
2065	ERBB3	v-erb-b2 erythroblastic leukemia viral oncogene homolog 3 (avian)	GGGCGGR_SP1_Q6	CAGGTG_E12_Q6	GGGAGGRR_MAZ_Q6	CTTTGT_LEF1_Q2	TTGTTT_FOXO4_01				TGGAAA_NFAT_Q4_01	CAGCTG_AP4_Q5
84146	ZNF644	zinc finger protein 644	GGGCGGR_SP1_Q6	CAGGTG_E12_Q6	GGGAGGRR_MAZ_Q6	CTTTGT_LEF1_Q2	TTGTTT_FOXO4_01				TGGAAA_NFAT_Q4_01
84688	C9orf24	chromosome 9 open reading frame 24	GGGCGGR_SP1_Q6	CAGGTG_E12_Q6	GGGAGGRR_MAZ_Q6	CTTTGT_LEF1_Q2	TTGTTT_FOXO4_01				TGGAAA_NFAT_Q4_01
1628	DBP	D site of albumin promoter (albumin D-box) binding protein	GGGCGGR_SP1_Q6	CAGGTG_E12_Q6	GGGAGGRR_MAZ_Q6	CTTTGT_LEF1_Q2	TTGTTT_FOXO4_01
27253	PCDH17	protocadherin 17	GGGCGGR_SP1_Q6	CAGGTG_E12_Q6	GGGAGGRR_MAZ_Q6	CTTTGT_LEF1_Q2	TTGTTT_FOXO4_01
200185	KRTCAP2	keratinocyte associated protein 2	GGGCGGR_SP1_Q6	CAGGTG_E12_Q6	GGGAGGRR_MAZ_Q6	CTTTGT_LEF1_Q2		SCGGAAGY_ELK1_02		GGGTGGRR_PAX4_03	TGGAAA_NFAT_Q4_01	CAGCTG_AP4_Q5
3326	HSP90AB1	heat shock protein 90kDa alpha (cytosolic), class B member 1	GGGCGGR_SP1_Q6	CAGGTG_E12_Q6	GGGAGGRR_MAZ_Q6	CTTTGT_LEF1_Q2		SCGGAAGY_ELK1_02
10658	CELF1	CUGBP, Elav-like family member 1	GGGCGGR_SP1_Q6	CAGGTG_E12_Q6	GGGAGGRR_MAZ_Q6	CTTTGT_LEF1_Q2		SCGGAAGY_ELK1_02
5331	PLCB3	phospholipase C, beta 3 (phosphatidylinositol-specific)	GGGCGGR_SP1_Q6	CAGGTG_E12_Q6	GGGAGGRR_MAZ_Q6	CTTTGT_LEF1_Q2			AACTTT_UNKNOWN	GGGTGGRR_PAX4_03
57513	CASKIN2	CASK interacting protein 2	GGGCGGR_SP1_Q6	CAGGTG_E12_Q6	GGGAGGRR_MAZ_Q6	CTTTGT_LEF1_Q2			AACTTT_UNKNOWN		TGGAAA_NFAT_Q4_01	CAGCTG_AP4_Q5
5339	PLEC	plectin	GGGCGGR_SP1_Q6	CAGGTG_E12_Q6	GGGAGGRR_MAZ_Q6	CTTTGT_LEF1_Q2				GGGTGGRR_PAX4_03	TGGAAA_NFAT_Q4_01	CAGCTG_AP4_Q5
10492	SYNCRIP	synaptotagmin binding, cytoplasmic RNA interacting protein	GGGCGGR_SP1_Q6	CAGGTG_E12_Q6	GGGAGGRR_MAZ_Q6	CTTTGT_LEF1_Q2				GGGTGGRR_PAX4_03	TGGAAA_NFAT_Q4_01
3159	HMGA1	high mobility group AT-hook 1	GGGCGGR_SP1_Q6	CAGGTG_E12_Q6	GGGAGGRR_MAZ_Q6	CTTTGT_LEF1_Q2				GGGTGGRR_PAX4_03
5639	PRRG2	proline rich Gla (G-carboxyglutamic acid) 2	GGGCGGR_SP1_Q6	CAGGTG_E12_Q6	GGGAGGRR_MAZ_Q6	CTTTGT_LEF1_Q2						CAGCTG_AP4_Q5
23085	ERC1	ELKS/RAB6-interacting/CAST family member 1	GGGCGGR_SP1_Q6	CAGGTG_E12_Q6	GGGAGGRR_MAZ_Q6	CTTTGT_LEF1_Q2
883	CCBL1	cysteine conjugate-beta lyase, cytoplasmic	GGGCGGR_SP1_Q6	CAGGTG_E12_Q6	GGGAGGRR_MAZ_Q6		TTGTTT_FOXO4_01	SCGGAAGY_ELK1_02		GGGTGGRR_PAX4_03
25865	PRKD2	protein kinase D2	GGGCGGR_SP1_Q6	CAGGTG_E12_Q6	GGGAGGRR_MAZ_Q6		TTGTTT_FOXO4_01		AACTTT_UNKNOWN	GGGTGGRR_PAX4_03	TGGAAA_NFAT_Q4_01
7067	THRA	thyroid hormone receptor, alpha	GGGCGGR_SP1_Q6	CAGGTG_E12_Q6	GGGAGGRR_MAZ_Q6		TTGTTT_FOXO4_01			GGGTGGRR_PAX4_03
8491	MAP4K3	mitogen-activated protein kinase kinase kinase kinase 3	GGGCGGR_SP1_Q6	CAGGTG_E12_Q6	GGGAGGRR_MAZ_Q6			SCGGAAGY_ELK1_02	AACTTT_UNKNOWN	GGGTGGRR_PAX4_03	TGGAAA_NFAT_Q4_01
92799	SHKBP1	SH3KBP1 binding protein 1	GGGCGGR_SP1_Q6	CAGGTG_E12_Q6	GGGAGGRR_MAZ_Q6			SCGGAAGY_ELK1_02		GGGTGGRR_PAX4_03
129285	PPP1R21	protein phosphatase 1, regulatory subunit 21	GGGCGGR_SP1_Q6	CAGGTG_E12_Q6	GGGAGGRR_MAZ_Q6			SCGGAAGY_ELK1_02
58495	OVOL2	ovo-like 2 (Drosophila)	GGGCGGR_SP1_Q6	CAGGTG_E12_Q6	GGGAGGRR_MAZ_Q6				AACTTT_UNKNOWN	GGGTGGRR_PAX4_03
11247	NXPH4	neurexophilin 4	GGGCGGR_SP1_Q6	CAGGTG_E12_Q6	GGGAGGRR_MAZ_Q6				AACTTT_UNKNOWN			CAGCTG_AP4_Q5
11255	HRH3	histamine receptor H3	GGGCGGR_SP1_Q6	CAGGTG_E12_Q6	GGGAGGRR_MAZ_Q6				AACTTT_UNKNOWN
63976	PRDM16	PR domain containing 16	GGGCGGR_SP1_Q6	CAGGTG_E12_Q6	GGGAGGRR_MAZ_Q6				AACTTT_UNKNOWN
388324	INCA1	inhibitor of CDK, cyclin A1 interacting protein 1	GGGCGGR_SP1_Q6	CAGGTG_E12_Q6	GGGAGGRR_MAZ_Q6					GGGTGGRR_PAX4_03
51561	IL23A	interleukin 23, alpha subunit p19	GGGCGGR_SP1_Q6	CAGGTG_E12_Q6	GGGAGGRR_MAZ_Q6						TGGAAA_NFAT_Q4_01
3911	LAMA5	laminin, alpha 5	GGGCGGR_SP1_Q6	CAGGTG_E12_Q6	GGGAGGRR_MAZ_Q6							CAGCTG_AP4_Q5
6261	RYR1	ryanodine receptor 1 (skeletal)	GGGCGGR_SP1_Q6	CAGGTG_E12_Q6	GGGAGGRR_MAZ_Q6							CAGCTG_AP4_Q5
114884	OSBPL10	oxysterol binding protein-like 10	GGGCGGR_SP1_Q6	CAGGTG_E12_Q6	GGGAGGRR_MAZ_Q6							CAGCTG_AP4_Q5
3750	KCND1	potassium voltage-gated channel, Shal-related subfamily, member 1	GGGCGGR_SP1_Q6	CAGGTG_E12_Q6	GGGAGGRR_MAZ_Q6
285613	RELL2	RELT-like 2	GGGCGGR_SP1_Q6	CAGGTG_E12_Q6	GGGAGGRR_MAZ_Q6
8841	HDAC3	histone deacetylase 3	GGGCGGR_SP1_Q6	CAGGTG_E12_Q6	GGGAGGRR_MAZ_Q6
246330	PELI3	pellino homolog 3 (Drosophila)	GGGCGGR_SP1_Q6	CAGGTG_E12_Q6	GGGAGGRR_MAZ_Q6
28999	KLF15	Kruppel-like factor 15	GGGCGGR_SP1_Q6	CAGGTG_E12_Q6	GGGAGGRR_MAZ_Q6
6738	TROVE2	TROVE domain family, member 2	GGGCGGR_SP1_Q6	CAGGTG_E12_Q6	GGGAGGRR_MAZ_Q6
256949	KANK3	KN motif and ankyrin repeat domains 3	GGGCGGR_SP1_Q6	CAGGTG_E12_Q6	GGGAGGRR_MAZ_Q6
9179	AP4M1	adaptor-related protein complex 4, mu 1 subunit	GGGCGGR_SP1_Q6	CAGGTG_E12_Q6		CTTTGT_LEF1_Q2	TTGTTT_FOXO4_01	SCGGAAGY_ELK1_02
11143	KAT7	K(lysine) acetyltransferase 7	GGGCGGR_SP1_Q6	CAGGTG_E12_Q6		CTTTGT_LEF1_Q2	TTGTTT_FOXO4_01	SCGGAAGY_ELK1_02
84445	LZTS2	leucine zipper, putative tumor suppressor 2	GGGCGGR_SP1_Q6	CAGGTG_E12_Q6		CTTTGT_LEF1_Q2	TTGTTT_FOXO4_01		AACTTT_UNKNOWN	GGGTGGRR_PAX4_03		CAGCTG_AP4_Q5
84978	FRMD5	FERM domain containing 5	GGGCGGR_SP1_Q6	CAGGTG_E12_Q6		CTTTGT_LEF1_Q2	TTGTTT_FOXO4_01		AACTTT_UNKNOWN			CAGCTG_AP4_Q5
27242	TNFRSF21	tumor necrosis factor receptor superfamily, member 21	GGGCGGR_SP1_Q6	CAGGTG_E12_Q6		CTTTGT_LEF1_Q2	TTGTTT_FOXO4_01		AACTTT_UNKNOWN
284	ANGPT1	angiopoietin 1	GGGCGGR_SP1_Q6	CAGGTG_E12_Q6		CTTTGT_LEF1_Q2	TTGTTT_FOXO4_01				TGGAAA_NFAT_Q4_01	CAGCTG_AP4_Q5
1657	DMXL1	Dmx-like 1	GGGCGGR_SP1_Q6	CAGGTG_E12_Q6		CTTTGT_LEF1_Q2	TTGTTT_FOXO4_01
54800	KLHL24	kelch-like 24 (Drosophila)	GGGCGGR_SP1_Q6	CAGGTG_E12_Q6		CTTTGT_LEF1_Q2	TTGTTT_FOXO4_01
2705	GJB1	gap junction protein, beta 1, 32kDa	GGGCGGR_SP1_Q6	CAGGTG_E12_Q6		CTTTGT_LEF1_Q2		SCGGAAGY_ELK1_02
4760	NEUROD1	neurogenic differentiation 1	GGGCGGR_SP1_Q6	CAGGTG_E12_Q6		CTTTGT_LEF1_Q2			AACTTT_UNKNOWN
85508	SCRT2	scratch homolog 2, zinc finger protein (Drosophila)	GGGCGGR_SP1_Q6	CAGGTG_E12_Q6		CTTTGT_LEF1_Q2			AACTTT_UNKNOWN
23033	DOPEY1	dopey family member 1	GGGCGGR_SP1_Q6	CAGGTG_E12_Q6		CTTTGT_LEF1_Q2			AACTTT_UNKNOWN
2140	EYA3	eyes absent homolog 3 (Drosophila)	GGGCGGR_SP1_Q6	CAGGTG_E12_Q6		CTTTGT_LEF1_Q2						CAGCTG_AP4_Q5
9929	JOSD1	Josephin domain containing 1	GGGCGGR_SP1_Q6	CAGGTG_E12_Q6		CTTTGT_LEF1_Q2
23240	KIAA0922	KIAA0922	GGGCGGR_SP1_Q6	CAGGTG_E12_Q6		CTTTGT_LEF1_Q2
3751	KCND2	potassium voltage-gated channel, Shal-related subfamily, member 2	GGGCGGR_SP1_Q6	CAGGTG_E12_Q6		CTTTGT_LEF1_Q2
5058	PAK1	p21 protein (Cdc42/Rac)-activated kinase 1	GGGCGGR_SP1_Q6	CAGGTG_E12_Q6		CTTTGT_LEF1_Q2
7122	CLDN5	claudin 5	GGGCGGR_SP1_Q6	CAGGTG_E12_Q6			TTGTTT_FOXO4_01	SCGGAAGY_ELK1_02
54891	INO80D	INO80 complex subunit D	GGGCGGR_SP1_Q6	CAGGTG_E12_Q6			TTGTTT_FOXO4_01		AACTTT_UNKNOWN	GGGTGGRR_PAX4_03	TGGAAA_NFAT_Q4_01
2257	FGF12	fibroblast growth factor 12	GGGCGGR_SP1_Q6	CAGGTG_E12_Q6			TTGTTT_FOXO4_01		AACTTT_UNKNOWN		TGGAAA_NFAT_Q4_01	CAGCTG_AP4_Q5
3781	KCNN2	potassium intermediate/small conductance calcium-activated channel, subfamily N, member 2	GGGCGGR_SP1_Q6	CAGGTG_E12_Q6			TTGTTT_FOXO4_01		AACTTT_UNKNOWN		TGGAAA_NFAT_Q4_01	CAGCTG_AP4_Q5
23500	DAAM2	dishevelled associated activator of morphogenesis 2	GGGCGGR_SP1_Q6	CAGGTG_E12_Q6			TTGTTT_FOXO4_01		AACTTT_UNKNOWN		TGGAAA_NFAT_Q4_01
55761	TTC17	tetratricopeptide repeat domain 17	GGGCGGR_SP1_Q6	CAGGTG_E12_Q6			TTGTTT_FOXO4_01		AACTTT_UNKNOWN
11282	MGAT4B	mannosyl (alpha-1,3-)-glycoprotein beta-1,4-N-acetylglucosaminyltransferase, isozyme B	GGGCGGR_SP1_Q6	CAGGTG_E12_Q6			TTGTTT_FOXO4_01				TGGAAA_NFAT_Q4_01
117289	TAGAP	T-cell activation RhoGTPase activating protein	GGGCGGR_SP1_Q6	CAGGTG_E12_Q6			TTGTTT_FOXO4_01				TGGAAA_NFAT_Q4_01
6830	SUPT6H	suppressor of Ty 6 homolog (S. cerevisiae)	GGGCGGR_SP1_Q6	CAGGTG_E12_Q6				SCGGAAGY_ELK1_02	AACTTT_UNKNOWN
6388	SDF2	stromal cell-derived factor 2	GGGCGGR_SP1_Q6	CAGGTG_E12_Q6				SCGGAAGY_ELK1_02	AACTTT_UNKNOWN
6810	STX4	syntaxin 4	GGGCGGR_SP1_Q6	CAGGTG_E12_Q6				SCGGAAGY_ELK1_02			TGGAAA_NFAT_Q4_01
6932	TCF7	transcription factor 7 (T-cell specific, HMG-box)	GGGCGGR_SP1_Q6	CAGGTG_E12_Q6				SCGGAAGY_ELK1_02				CAGCTG_AP4_Q5
5429	POLH	polymerase (DNA directed), eta	GGGCGGR_SP1_Q6	CAGGTG_E12_Q6				SCGGAAGY_ELK1_02
292	SLC25A5	solute carrier family 25 (mitochondrial carrier; adenine nucleotide translocator), member 5	GGGCGGR_SP1_Q6	CAGGTG_E12_Q6				SCGGAAGY_ELK1_02
6710	SPTB	spectrin, beta, erythrocytic	GGGCGGR_SP1_Q6	CAGGTG_E12_Q6					AACTTT_UNKNOWN	GGGTGGRR_PAX4_03
5861	RAB1A	RAB1A, member RAS oncogene family	GGGCGGR_SP1_Q6	CAGGTG_E12_Q6					AACTTT_UNKNOWN	GGGTGGRR_PAX4_03
79589	RNF128	ring finger protein 128	GGGCGGR_SP1_Q6	CAGGTG_E12_Q6					AACTTT_UNKNOWN		TGGAAA_NFAT_Q4_01
5520	PPP2R2A	protein phosphatase 2, regulatory subunit B, alpha	GGGCGGR_SP1_Q6	CAGGTG_E12_Q6					AACTTT_UNKNOWN
8531	CSDA	cold shock domain protein A	GGGCGGR_SP1_Q6	CAGGTG_E12_Q6						GGGTGGRR_PAX4_03
1847	DUSP5	dual specificity phosphatase 5	GGGCGGR_SP1_Q6	CAGGTG_E12_Q6						GGGTGGRR_PAX4_03
10550	ARL6IP5	ADP-ribosylation-like factor 6 interacting protein 5	GGGCGGR_SP1_Q6	CAGGTG_E12_Q6							TGGAAA_NFAT_Q4_01	CAGCTG_AP4_Q5
50619	DEF6	differentially expressed in FDCP 6 homolog (mouse)	GGGCGGR_SP1_Q6	CAGGTG_E12_Q6							TGGAAA_NFAT_Q4_01
219699	UNC5B	unc-5 homolog B (C. elegans)	GGGCGGR_SP1_Q6	CAGGTG_E12_Q6
3069	HDLBP	high density lipoprotein binding protein	GGGCGGR_SP1_Q6	CAGGTG_E12_Q6
129303	TMEM150A	transmembrane protein 150A	GGGCGGR_SP1_Q6	CAGGTG_E12_Q6
4150	MAZ	MYC-associated zinc finger protein (purine-binding transcription factor)	GGGCGGR_SP1_Q6	CAGGTG_E12_Q6
57103	C12orf5	chromosome 12 open reading frame 5	GGGCGGR_SP1_Q6	CAGGTG_E12_Q6
9266	CYTH2	cytohesin 2	GGGCGGR_SP1_Q6	CAGGTG_E12_Q6
81562	LMAN2L	lectin, mannose-binding 2-like	GGGCGGR_SP1_Q6	CAGGTG_E12_Q6
7942	TFEB	transcription factor EB	GGGCGGR_SP1_Q6	CAGGTG_E12_Q6
50618	ITSN2	intersectin 2	GGGCGGR_SP1_Q6	CAGGTG_E12_Q6
1838	DTNB	dystrobrevin, beta	GGGCGGR_SP1_Q6	CAGGTG_E12_Q6
6525	SMTN	smoothelin	GGGCGGR_SP1_Q6	CAGGTG_E12_Q6
26007	DAK	dihydroxyacetone kinase 2 homolog (S. cerevisiae)	GGGCGGR_SP1_Q6	CAGGTG_E12_Q6
23636	NUP62	nucleoporin 62kDa	GGGCGGR_SP1_Q6	CAGGTG_E12_Q6
36	ACADSB	acyl-CoA dehydrogenase, short/branched chain	GGGCGGR_SP1_Q6	CAGGTG_E12_Q6
84446	BRSK1	BR serine/threonine kinase 1	GGGCGGR_SP1_Q6	CAGGTG_E12_Q6
7358	UGDH	UDP-glucose 6-dehydrogenase	GGGCGGR_SP1_Q6	CAGGTG_E12_Q6
84920	ALG10	asparagine-linked glycosylation 10, alpha-1,2-glucosyltransferase homolog (S. pombe)	GGGCGGR_SP1_Q6	CAGGTG_E12_Q6
2875	GPT	glutamic-pyruvate transaminase (alanine aminotransferase)	GGGCGGR_SP1_Q6	CAGGTG_E12_Q6
90799	CEP95	centrosomal protein 95kDa	GGGCGGR_SP1_Q6		GGGAGGRR_MAZ_Q6	CTTTGT_LEF1_Q2	TTGTTT_FOXO4_01	SCGGAAGY_ELK1_02				CAGCTG_AP4_Q5
1981	EIF4G1	eukaryotic translation initiation factor 4 gamma, 1	GGGCGGR_SP1_Q6		GGGAGGRR_MAZ_Q6	CTTTGT_LEF1_Q2	TTGTTT_FOXO4_01		AACTTT_UNKNOWN	GGGTGGRR_PAX4_03	TGGAAA_NFAT_Q4_01
7023	TFAP4	transcription factor AP-4 (activating enhancer binding protein 4)	GGGCGGR_SP1_Q6		GGGAGGRR_MAZ_Q6	CTTTGT_LEF1_Q2	TTGTTT_FOXO4_01		AACTTT_UNKNOWN		TGGAAA_NFAT_Q4_01	CAGCTG_AP4_Q5
4821	NKX2-2	NK2 homeobox 2	GGGCGGR_SP1_Q6		GGGAGGRR_MAZ_Q6	CTTTGT_LEF1_Q2	TTGTTT_FOXO4_01		AACTTT_UNKNOWN		TGGAAA_NFAT_Q4_01	CAGCTG_AP4_Q5
26050	SLITRK5	SLIT and NTRK-like family, member 5	GGGCGGR_SP1_Q6		GGGAGGRR_MAZ_Q6	CTTTGT_LEF1_Q2	TTGTTT_FOXO4_01		AACTTT_UNKNOWN		TGGAAA_NFAT_Q4_01	CAGCTG_AP4_Q5
148479	PHF13	PHD finger protein 13	GGGCGGR_SP1_Q6		GGGAGGRR_MAZ_Q6	CTTTGT_LEF1_Q2	TTGTTT_FOXO4_01		AACTTT_UNKNOWN
5292	PIM1	pim-1 oncogene	GGGCGGR_SP1_Q6		GGGAGGRR_MAZ_Q6	CTTTGT_LEF1_Q2	TTGTTT_FOXO4_01			GGGTGGRR_PAX4_03	TGGAAA_NFAT_Q4_01
901	CCNG2	cyclin G2	GGGCGGR_SP1_Q6		GGGAGGRR_MAZ_Q6	CTTTGT_LEF1_Q2	TTGTTT_FOXO4_01
7531	YWHAE	tyrosine 3-monooxygenase/tryptophan 5-monooxygenase activation protein, epsilon polypeptide	GGGCGGR_SP1_Q6		GGGAGGRR_MAZ_Q6	CTTTGT_LEF1_Q2		SCGGAAGY_ELK1_02		GGGTGGRR_PAX4_03
545	ATR	ataxia telangiectasia and Rad3 related	GGGCGGR_SP1_Q6		GGGAGGRR_MAZ_Q6	CTTTGT_LEF1_Q2		SCGGAAGY_ELK1_02
10236	HNRNPR	heterogeneous nuclear ribonucleoprotein R	GGGCGGR_SP1_Q6		GGGAGGRR_MAZ_Q6	CTTTGT_LEF1_Q2			AACTTT_UNKNOWN	GGGTGGRR_PAX4_03
3005	H1F0	H1 histone family, member 0	GGGCGGR_SP1_Q6		GGGAGGRR_MAZ_Q6	CTTTGT_LEF1_Q2			AACTTT_UNKNOWN		TGGAAA_NFAT_Q4_01	CAGCTG_AP4_Q5
4851	NOTCH1	notch 1	GGGCGGR_SP1_Q6		GGGAGGRR_MAZ_Q6	CTTTGT_LEF1_Q2			AACTTT_UNKNOWN			CAGCTG_AP4_Q5
7916	PRRC2A	proline-rich coiled-coil 2A	GGGCGGR_SP1_Q6		GGGAGGRR_MAZ_Q6	CTTTGT_LEF1_Q2			AACTTT_UNKNOWN
8128	ST8SIA2	ST8 alpha-N-acetyl-neuraminide alpha-2,8-sialyltransferase 2	GGGCGGR_SP1_Q6		GGGAGGRR_MAZ_Q6	CTTTGT_LEF1_Q2			AACTTT_UNKNOWN
8482	SEMA7A	semaphorin 7A, GPI membrane anchor (John Milton Hagen blood group)	GGGCGGR_SP1_Q6		GGGAGGRR_MAZ_Q6	CTTTGT_LEF1_Q2				GGGTGGRR_PAX4_03	TGGAAA_NFAT_Q4_01	CAGCTG_AP4_Q5
3837	KPNB1	karyopherin (importin) beta 1	GGGCGGR_SP1_Q6		GGGAGGRR_MAZ_Q6	CTTTGT_LEF1_Q2				GGGTGGRR_PAX4_03
27123	DKK2	dickkopf homolog 2 (Xenopus laevis)	GGGCGGR_SP1_Q6		GGGAGGRR_MAZ_Q6	CTTTGT_LEF1_Q2					TGGAAA_NFAT_Q4_01
58478	ENOPH1	enolase-phosphatase 1	GGGCGGR_SP1_Q6		GGGAGGRR_MAZ_Q6	CTTTGT_LEF1_Q2						CAGCTG_AP4_Q5
23580	CDC42EP4	CDC42 effector protein (Rho GTPase binding) 4	GGGCGGR_SP1_Q6		GGGAGGRR_MAZ_Q6	CTTTGT_LEF1_Q2
1959	EGR2	early growth response 2	GGGCGGR_SP1_Q6		GGGAGGRR_MAZ_Q6		TTGTTT_FOXO4_01	SCGGAAGY_ELK1_02	AACTTT_UNKNOWN		TGGAAA_NFAT_Q4_01	CAGCTG_AP4_Q5
5094	PCBP2	poly(rC) binding protein 2	GGGCGGR_SP1_Q6		GGGAGGRR_MAZ_Q6		TTGTTT_FOXO4_01	SCGGAAGY_ELK1_02			TGGAAA_NFAT_Q4_01	CAGCTG_AP4_Q5
5926	ARID4A	AT rich interactive domain 4A (RBP1-like)	GGGCGGR_SP1_Q6		GGGAGGRR_MAZ_Q6		TTGTTT_FOXO4_01	SCGGAAGY_ELK1_02			TGGAAA_NFAT_Q4_01
2957	GTF2A1	general transcription factor IIA, 1, 19/37kDa	GGGCGGR_SP1_Q6		GGGAGGRR_MAZ_Q6		TTGTTT_FOXO4_01	SCGGAAGY_ELK1_02
11345	GABARAPL2	GABA(A) receptor-associated protein-like 2	GGGCGGR_SP1_Q6		GGGAGGRR_MAZ_Q6		TTGTTT_FOXO4_01	SCGGAAGY_ELK1_02
2119	ETV5	ets variant 5	GGGCGGR_SP1_Q6		GGGAGGRR_MAZ_Q6		TTGTTT_FOXO4_01		AACTTT_UNKNOWN	GGGTGGRR_PAX4_03	TGGAAA_NFAT_Q4_01	CAGCTG_AP4_Q5
11248	NXPH3	neurexophilin 3	GGGCGGR_SP1_Q6		GGGAGGRR_MAZ_Q6		TTGTTT_FOXO4_01		AACTTT_UNKNOWN			CAGCTG_AP4_Q5
6926	TBX3	T-box 3	GGGCGGR_SP1_Q6		GGGAGGRR_MAZ_Q6		TTGTTT_FOXO4_01			GGGTGGRR_PAX4_03	TGGAAA_NFAT_Q4_01	CAGCTG_AP4_Q5
25953	PNKD	paroxysmal nonkinesigenic dyskinesia	GGGCGGR_SP1_Q6		GGGAGGRR_MAZ_Q6		TTGTTT_FOXO4_01			GGGTGGRR_PAX4_03	TGGAAA_NFAT_Q4_01
60509	AGBL5	ATP/GTP binding protein-like 5	GGGCGGR_SP1_Q6		GGGAGGRR_MAZ_Q6		TTGTTT_FOXO4_01			GGGTGGRR_PAX4_03		CAGCTG_AP4_Q5
84441	MAML2	mastermind-like 2 (Drosophila)	GGGCGGR_SP1_Q6		GGGAGGRR_MAZ_Q6		TTGTTT_FOXO4_01				TGGAAA_NFAT_Q4_01
55611	OTUB1	OTU domain, ubiquitin aldehyde binding 1	GGGCGGR_SP1_Q6		GGGAGGRR_MAZ_Q6			SCGGAAGY_ELK1_02	AACTTT_UNKNOWN
387	RHOA	ras homolog gene family, member A	GGGCGGR_SP1_Q6		GGGAGGRR_MAZ_Q6			SCGGAAGY_ELK1_02		GGGTGGRR_PAX4_03	TGGAAA_NFAT_Q4_01
6988	TCTA	T-cell leukemia translocation altered gene	GGGCGGR_SP1_Q6		GGGAGGRR_MAZ_Q6			SCGGAAGY_ELK1_02		GGGTGGRR_PAX4_03	TGGAAA_NFAT_Q4_01
4201	MEA1	male-enhanced antigen 1	GGGCGGR_SP1_Q6		GGGAGGRR_MAZ_Q6			SCGGAAGY_ELK1_02		GGGTGGRR_PAX4_03
116138	KLHDC3	kelch domain containing 3	GGGCGGR_SP1_Q6		GGGAGGRR_MAZ_Q6			SCGGAAGY_ELK1_02		GGGTGGRR_PAX4_03
65264	UBE2Z	ubiquitin-conjugating enzyme E2Z	GGGCGGR_SP1_Q6		GGGAGGRR_MAZ_Q6			SCGGAAGY_ELK1_02		GGGTGGRR_PAX4_03
29100	TMEM208	transmembrane protein 208	GGGCGGR_SP1_Q6		GGGAGGRR_MAZ_Q6			SCGGAAGY_ELK1_02
26231	LRRC29	leucine rich repeat containing 29	GGGCGGR_SP1_Q6		GGGAGGRR_MAZ_Q6			SCGGAAGY_ELK1_02
56681	SAR1A	SAR1 homolog A (S. cerevisiae)	GGGCGGR_SP1_Q6		GGGAGGRR_MAZ_Q6			SCGGAAGY_ELK1_02
51096	UTP18	UTP18, small subunit (SSU) processome component, homolog (yeast)	GGGCGGR_SP1_Q6		GGGAGGRR_MAZ_Q6				AACTTT_UNKNOWN	GGGTGGRR_PAX4_03	TGGAAA_NFAT_Q4_01
79012	CAMKV	CaM kinase-like vesicle-associated	GGGCGGR_SP1_Q6		GGGAGGRR_MAZ_Q6				AACTTT_UNKNOWN		TGGAAA_NFAT_Q4_01	CAGCTG_AP4_Q5
22873	DZIP1	DAZ interacting protein 1	GGGCGGR_SP1_Q6		GGGAGGRR_MAZ_Q6				AACTTT_UNKNOWN
7162	TPBG	trophoblast glycoprotein	GGGCGGR_SP1_Q6		GGGAGGRR_MAZ_Q6				AACTTT_UNKNOWN
1615	DARS	aspartyl-tRNA synthetase	GGGCGGR_SP1_Q6		GGGAGGRR_MAZ_Q6				AACTTT_UNKNOWN
4665	NAB2	NGFI-A binding protein 2 (EGR1 binding protein 2)	GGGCGGR_SP1_Q6		GGGAGGRR_MAZ_Q6					GGGTGGRR_PAX4_03	TGGAAA_NFAT_Q4_01
51322	WAC	WW domain containing adaptor with coiled-coil	GGGCGGR_SP1_Q6		GGGAGGRR_MAZ_Q6					GGGTGGRR_PAX4_03	TGGAAA_NFAT_Q4_01
93129	ORAI3	ORAI calcium release-activated calcium modulator 3	GGGCGGR_SP1_Q6		GGGAGGRR_MAZ_Q6					GGGTGGRR_PAX4_03	TGGAAA_NFAT_Q4_01
5358	PLS3	plastin 3	GGGCGGR_SP1_Q6		GGGAGGRR_MAZ_Q6					GGGTGGRR_PAX4_03		CAGCTG_AP4_Q5
22924	MAPRE3	microtubule-associated protein, RP/EB family, member 3	GGGCGGR_SP1_Q6		GGGAGGRR_MAZ_Q6					GGGTGGRR_PAX4_03		CAGCTG_AP4_Q5
253982	ASPHD1	aspartate beta-hydroxylase domain containing 1	GGGCGGR_SP1_Q6		GGGAGGRR_MAZ_Q6					GGGTGGRR_PAX4_03
254428	SLC41A1	solute carrier family 41, member 1	GGGCGGR_SP1_Q6		GGGAGGRR_MAZ_Q6					GGGTGGRR_PAX4_03
1176	AP3S1	adaptor-related protein complex 3, sigma 1 subunit	GGGCGGR_SP1_Q6		GGGAGGRR_MAZ_Q6					GGGTGGRR_PAX4_03
9140	ATG12	ATG12 autophagy related 12 homolog (S. cerevisiae)	GGGCGGR_SP1_Q6		GGGAGGRR_MAZ_Q6					GGGTGGRR_PAX4_03
5327	PLAT	plasminogen activator, tissue	GGGCGGR_SP1_Q6		GGGAGGRR_MAZ_Q6					GGGTGGRR_PAX4_03
81629	TSSK3	testis-specific serine kinase 3	GGGCGGR_SP1_Q6		GGGAGGRR_MAZ_Q6						TGGAAA_NFAT_Q4_01
93643	TJAP1	tight junction associated protein 1 (peripheral)	GGGCGGR_SP1_Q6		GGGAGGRR_MAZ_Q6						TGGAAA_NFAT_Q4_01
10633	RASL10A	RAS-like, family 10, member A	GGGCGGR_SP1_Q6		GGGAGGRR_MAZ_Q6							CAGCTG_AP4_Q5
6620	SNCB	synuclein, beta	GGGCGGR_SP1_Q6		GGGAGGRR_MAZ_Q6
3276	PRMT1	protein arginine methyltransferase 1	GGGCGGR_SP1_Q6		GGGAGGRR_MAZ_Q6
11031	RAB31	RAB31, member RAS oncogene family	GGGCGGR_SP1_Q6		GGGAGGRR_MAZ_Q6
6048	RNF5	ring finger protein 5	GGGCGGR_SP1_Q6		GGGAGGRR_MAZ_Q6
3726	JUNB	jun B proto-oncogene	GGGCGGR_SP1_Q6		GGGAGGRR_MAZ_Q6
27128	CYTH4	cytohesin 4	GGGCGGR_SP1_Q6		GGGAGGRR_MAZ_Q6
83706	FERMT3	fermitin family member 3	GGGCGGR_SP1_Q6		GGGAGGRR_MAZ_Q6
10250	SRRM1	serine/arginine repetitive matrix 1	GGGCGGR_SP1_Q6		GGGAGGRR_MAZ_Q6
53405	CLIC5	chloride intracellular channel 5	GGGCGGR_SP1_Q6		GGGAGGRR_MAZ_Q6
7543	ZFX	zinc finger protein, X-linked	GGGCGGR_SP1_Q6		GGGAGGRR_MAZ_Q6
23659	PLA2G15	phospholipase A2, group XV	GGGCGGR_SP1_Q6		GGGAGGRR_MAZ_Q6
3998	LMAN1	lectin, mannose-binding, 1	GGGCGGR_SP1_Q6		GGGAGGRR_MAZ_Q6
115704	EVI5L	ecotropic viral integration site 5-like	GGGCGGR_SP1_Q6		GGGAGGRR_MAZ_Q6
3748	KCNC3	potassium voltage-gated channel, Shaw-related subfamily, member 3	GGGCGGR_SP1_Q6		GGGAGGRR_MAZ_Q6
65260	SELRC1	Sel1 repeat containing 1	GGGCGGR_SP1_Q6		GGGAGGRR_MAZ_Q6
3350	HTR1A	5-hydroxytryptamine (serotonin) receptor 1A	GGGCGGR_SP1_Q6		GGGAGGRR_MAZ_Q6
6880	TAF9	TAF9 RNA polymerase II, TATA box binding protein (TBP)-associated factor, 32kDa	GGGCGGR_SP1_Q6		GGGAGGRR_MAZ_Q6
5571	PRKAG1	protein kinase, AMP-activated, gamma 1 non-catalytic subunit	GGGCGGR_SP1_Q6			CTTTGT_LEF1_Q2	TTGTTT_FOXO4_01	SCGGAAGY_ELK1_02		GGGTGGRR_PAX4_03
9646	CTR9	Ctr9, Paf1/RNA polymerase II complex component, homolog (S. cerevisiae)	GGGCGGR_SP1_Q6			CTTTGT_LEF1_Q2	TTGTTT_FOXO4_01	SCGGAAGY_ELK1_02
5396	PRRX1	paired related homeobox 1	GGGCGGR_SP1_Q6			CTTTGT_LEF1_Q2	TTGTTT_FOXO4_01		AACTTT_UNKNOWN	GGGTGGRR_PAX4_03	TGGAAA_NFAT_Q4_01
2913	GRM3	glutamate receptor, metabotropic 3	GGGCGGR_SP1_Q6			CTTTGT_LEF1_Q2	TTGTTT_FOXO4_01		AACTTT_UNKNOWN	GGGTGGRR_PAX4_03	TGGAAA_NFAT_Q4_01
972	CD74	CD74 molecule, major histocompatibility complex, class II invariant chain	GGGCGGR_SP1_Q6			CTTTGT_LEF1_Q2	TTGTTT_FOXO4_01				TGGAAA_NFAT_Q4_01
64753	CCDC136	coiled-coil domain containing 136	GGGCGGR_SP1_Q6			CTTTGT_LEF1_Q2	TTGTTT_FOXO4_01
79668	PARP8	poly (ADP-ribose) polymerase family, member 8	GGGCGGR_SP1_Q6			CTTTGT_LEF1_Q2		SCGGAAGY_ELK1_02				CAGCTG_AP4_Q5
10487	CAP1	CAP, adenylate cyclase-associated protein 1 (yeast)	GGGCGGR_SP1_Q6			CTTTGT_LEF1_Q2		SCGGAAGY_ELK1_02
11325	DDX42	DEAD (Asp-Glu-Ala-Asp) box polypeptide 42	GGGCGGR_SP1_Q6			CTTTGT_LEF1_Q2		SCGGAAGY_ELK1_02
2975	GTF3C1	general transcription factor IIIC, polypeptide 1, alpha 220kDa	GGGCGGR_SP1_Q6			CTTTGT_LEF1_Q2		SCGGAAGY_ELK1_02
10948	STARD3	StAR-related lipid transfer (START) domain containing 3	GGGCGGR_SP1_Q6			CTTTGT_LEF1_Q2		SCGGAAGY_ELK1_02
4355	MPP2	membrane protein, palmitoylated 2 (MAGUK p55 subfamily member 2)	GGGCGGR_SP1_Q6			CTTTGT_LEF1_Q2			AACTTT_UNKNOWN	GGGTGGRR_PAX4_03
10082	GPC6	glypican 6	GGGCGGR_SP1_Q6			CTTTGT_LEF1_Q2			AACTTT_UNKNOWN
1778	DYNC1H1	dynein, cytoplasmic 1, heavy chain 1	GGGCGGR_SP1_Q6			CTTTGT_LEF1_Q2				GGGTGGRR_PAX4_03
4947	OAZ2	ornithine decarboxylase antizyme 2	GGGCGGR_SP1_Q6			CTTTGT_LEF1_Q2				GGGTGGRR_PAX4_03
29896	TRA2A	transformer 2 alpha homolog (Drosophila)	GGGCGGR_SP1_Q6			CTTTGT_LEF1_Q2					TGGAAA_NFAT_Q4_01
219654	ZCCHC24	zinc finger, CCHC domain containing 24	GGGCGGR_SP1_Q6			CTTTGT_LEF1_Q2						CAGCTG_AP4_Q5
94134	ARHGAP12	Rho GTPase activating protein 12	GGGCGGR_SP1_Q6			CTTTGT_LEF1_Q2
9274	BCL7C	B-cell CLL/lymphoma 7C	GGGCGGR_SP1_Q6			CTTTGT_LEF1_Q2
8851	CDK5R1	cyclin-dependent kinase 5, regulatory subunit 1 (p35)	GGGCGGR_SP1_Q6			CTTTGT_LEF1_Q2
25820	ARIH1	ariadne homolog, ubiquitin-conjugating enzyme E2 binding protein, 1 (Drosophila)	GGGCGGR_SP1_Q6			CTTTGT_LEF1_Q2
78994	PRR14	proline rich 14	GGGCGGR_SP1_Q6			CTTTGT_LEF1_Q2
8935	SKAP2	src kinase associated phosphoprotein 2	GGGCGGR_SP1_Q6			CTTTGT_LEF1_Q2
673	BRAF	v-raf murine sarcoma viral oncogene homolog B1	GGGCGGR_SP1_Q6			CTTTGT_LEF1_Q2
11057	ABHD2	abhydrolase domain containing 2	GGGCGGR_SP1_Q6			CTTTGT_LEF1_Q2
64847	SPATA20	spermatogenesis associated 20	GGGCGGR_SP1_Q6			CTTTGT_LEF1_Q2
84002	B3GNT5	UDP-GlcNAc:betaGal beta-1,3-N-acetylglucosaminyltransferase 5	GGGCGGR_SP1_Q6			CTTTGT_LEF1_Q2
89958	C9orf140	chromosome 9 open reading frame 140	GGGCGGR_SP1_Q6			CTTTGT_LEF1_Q2
6645	SNTB2	syntrophin, beta 2 (dystrophin-associated protein A1, 59kDa, basic component 2)	GGGCGGR_SP1_Q6				TTGTTT_FOXO4_01	SCGGAAGY_ELK1_02	AACTTT_UNKNOWN
10445	MCRS1	microspherule protein 1	GGGCGGR_SP1_Q6				TTGTTT_FOXO4_01	SCGGAAGY_ELK1_02
4254	KITLG	KIT ligand	GGGCGGR_SP1_Q6				TTGTTT_FOXO4_01		AACTTT_UNKNOWN
3087	HHEX	hematopoietically expressed homeobox	GGGCGGR_SP1_Q6				TTGTTT_FOXO4_01			GGGTGGRR_PAX4_03		CAGCTG_AP4_Q5
1027	CDKN1B	cyclin-dependent kinase inhibitor 1B (p27, Kip1)	GGGCGGR_SP1_Q6				TTGTTT_FOXO4_01			GGGTGGRR_PAX4_03		CAGCTG_AP4_Q5
2321	FLT1	fms-related tyrosine kinase 1 (vascular endothelial growth factor/vascular permeability factor receptor)	GGGCGGR_SP1_Q6				TTGTTT_FOXO4_01			GGGTGGRR_PAX4_03
56889	TM9SF3	transmembrane 9 superfamily member 3	GGGCGGR_SP1_Q6				TTGTTT_FOXO4_01
10621	POLR3F	polymerase (RNA) III (DNA directed) polypeptide F, 39 kDa	GGGCGGR_SP1_Q6				TTGTTT_FOXO4_01
23710	GABARAPL1	GABA(A) receptor-associated protein like 1	GGGCGGR_SP1_Q6				TTGTTT_FOXO4_01
57863	CADM3	cell adhesion molecule 3	GGGCGGR_SP1_Q6				TTGTTT_FOXO4_01
163259	DENND2C	DENN/MADD domain containing 2C	GGGCGGR_SP1_Q6				TTGTTT_FOXO4_01
51667	NUB1	negative regulator of ubiquitin-like proteins 1	GGGCGGR_SP1_Q6				TTGTTT_FOXO4_01
91452	ACBD5	acyl-CoA binding domain containing 5	GGGCGGR_SP1_Q6					SCGGAAGY_ELK1_02	AACTTT_UNKNOWN	GGGTGGRR_PAX4_03
6558	SLC12A2	solute carrier family 12 (sodium/potassium/chloride transporters), member 2	GGGCGGR_SP1_Q6					SCGGAAGY_ELK1_02	AACTTT_UNKNOWN			CAGCTG_AP4_Q5
83548	COG3	component of oligomeric golgi complex 3	GGGCGGR_SP1_Q6					SCGGAAGY_ELK1_02	AACTTT_UNKNOWN
10421	CD2BP2	CD2 (cytoplasmic tail) binding protein 2	GGGCGGR_SP1_Q6					SCGGAAGY_ELK1_02		GGGTGGRR_PAX4_03
9409	PEX16	peroxisomal biogenesis factor 16	GGGCGGR_SP1_Q6					SCGGAAGY_ELK1_02			TGGAAA_NFAT_Q4_01
5437	POLR2H	polymerase (RNA) II (DNA directed) polypeptide H	GGGCGGR_SP1_Q6					SCGGAAGY_ELK1_02
79934	ADCK4	aarF domain containing kinase 4	GGGCGGR_SP1_Q6					SCGGAAGY_ELK1_02
84279	PRADC1	protease-associated domain containing 1	GGGCGGR_SP1_Q6					SCGGAAGY_ELK1_02
22919	MAPRE1	microtubule-associated protein, RP/EB family, member 1	GGGCGGR_SP1_Q6					SCGGAAGY_ELK1_02
26091	HERC4	hect domain and RLD 4	GGGCGGR_SP1_Q6					SCGGAAGY_ELK1_02
79684	C11orf61	chromosome 11 open reading frame 61	GGGCGGR_SP1_Q6					SCGGAAGY_ELK1_02
6429	SRSF4	serine/arginine-rich splicing factor 4	GGGCGGR_SP1_Q6					SCGGAAGY_ELK1_02
29997	GLTSCR2	glioma tumor suppressor candidate region gene 2	GGGCGGR_SP1_Q6					SCGGAAGY_ELK1_02
79109	MAPKAP1	mitogen-activated protein kinase associated protein 1	GGGCGGR_SP1_Q6					SCGGAAGY_ELK1_02
6801	STRN	striatin, calmodulin binding protein	GGGCGGR_SP1_Q6					SCGGAAGY_ELK1_02
8654	PDE5A	phosphodiesterase 5A, cGMP-specific	GGGCGGR_SP1_Q6					SCGGAAGY_ELK1_02
9869	SETDB1	SET domain, bifurcated 1	GGGCGGR_SP1_Q6					SCGGAAGY_ELK1_02
152185	SPICE1	spindle and centriole associated protein 1	GGGCGGR_SP1_Q6					SCGGAAGY_ELK1_02
29058	C20orf30	chromosome 20 open reading frame 30	GGGCGGR_SP1_Q6					SCGGAAGY_ELK1_02
788	SLC25A20	solute carrier family 25 (carnitine/acylcarnitine translocase), member 20	GGGCGGR_SP1_Q6					SCGGAAGY_ELK1_02
83933	HDAC10	histone deacetylase 10	GGGCGGR_SP1_Q6					SCGGAAGY_ELK1_02
10134	BCAP31	B-cell receptor-associated protein 31	GGGCGGR_SP1_Q6						AACTTT_UNKNOWN	GGGTGGRR_PAX4_03	TGGAAA_NFAT_Q4_01
1374	CPT1A	carnitine palmitoyltransferase 1A (liver)	GGGCGGR_SP1_Q6						AACTTT_UNKNOWN	GGGTGGRR_PAX4_03
9509	ADAMTS2	ADAM metallopeptidase with thrombospondin type 1 motif, 2	GGGCGGR_SP1_Q6						AACTTT_UNKNOWN		TGGAAA_NFAT_Q4_01	CAGCTG_AP4_Q5
5255	PHKA1	phosphorylase kinase, alpha 1 (muscle)	GGGCGGR_SP1_Q6						AACTTT_UNKNOWN		TGGAAA_NFAT_Q4_01	CAGCTG_AP4_Q5
3636	INPPL1	inositol polyphosphate phosphatase-like 1	GGGCGGR_SP1_Q6						AACTTT_UNKNOWN			CAGCTG_AP4_Q5
23788	MTCH2	mitochondrial carrier 2	GGGCGGR_SP1_Q6						AACTTT_UNKNOWN
63916	ELMO2	engulfment and cell motility 2	GGGCGGR_SP1_Q6						AACTTT_UNKNOWN
55704	CCDC88A	coiled-coil domain containing 88A	GGGCGGR_SP1_Q6						AACTTT_UNKNOWN
9653	HS2ST1	heparan sulfate 2-O-sulfotransferase 1	GGGCGGR_SP1_Q6						AACTTT_UNKNOWN
2595	GANC	glucosidase, alpha; neutral C	GGGCGGR_SP1_Q6						AACTTT_UNKNOWN
9925	ZBTB5	zinc finger and BTB domain containing 5	GGGCGGR_SP1_Q6							GGGTGGRR_PAX4_03	TGGAAA_NFAT_Q4_01
55640	FLVCR2	feline leukemia virus subgroup C cellular receptor family, member 2	GGGCGGR_SP1_Q6							GGGTGGRR_PAX4_03	TGGAAA_NFAT_Q4_01
10013	HDAC6	histone deacetylase 6	GGGCGGR_SP1_Q6							GGGTGGRR_PAX4_03	TGGAAA_NFAT_Q4_01
5777	PTPN6	protein tyrosine phosphatase, non-receptor type 6	GGGCGGR_SP1_Q6							GGGTGGRR_PAX4_03		CAGCTG_AP4_Q5
4692	NDN	necdin homolog (mouse)	GGGCGGR_SP1_Q6							GGGTGGRR_PAX4_03
9956	HS3ST2	heparan sulfate (glucosamine) 3-O-sulfotransferase 2	GGGCGGR_SP1_Q6							GGGTGGRR_PAX4_03
573	BAG1	BCL2-associated athanogene	GGGCGGR_SP1_Q6							GGGTGGRR_PAX4_03
221002	RASGEF1A	RasGEF domain family, member 1A	GGGCGGR_SP1_Q6								TGGAAA_NFAT_Q4_01	CAGCTG_AP4_Q5
51735	RAPGEF6	Rap guanine nucleotide exchange factor (GEF) 6	GGGCGGR_SP1_Q6								TGGAAA_NFAT_Q4_01
84081	NSRP1	nuclear speckle splicing regulatory protein 1	GGGCGGR_SP1_Q6								TGGAAA_NFAT_Q4_01
25816	TNFAIP8	tumor necrosis factor, alpha-induced protein 8	GGGCGGR_SP1_Q6								TGGAAA_NFAT_Q4_01
84280	BTBD10	BTB (POZ) domain containing 10	GGGCGGR_SP1_Q6								TGGAAA_NFAT_Q4_01
29969	MDFIC	MyoD family inhibitor domain containing	GGGCGGR_SP1_Q6								TGGAAA_NFAT_Q4_01
5510	PPP1R7	protein phosphatase 1, regulatory subunit 7	GGGCGGR_SP1_Q6									CAGCTG_AP4_Q5
3309	HSPA5	heat shock 70kDa protein 5 (glucose-regulated protein, 78kDa)	GGGCGGR_SP1_Q6									CAGCTG_AP4_Q5
57679	ALS2	amyotrophic lateral sclerosis 2 (juvenile)	GGGCGGR_SP1_Q6									CAGCTG_AP4_Q5
5873	RAB27A	RAB27A, member RAS oncogene family	GGGCGGR_SP1_Q6									CAGCTG_AP4_Q5
55223	TRIM62	tripartite motif containing 62	GGGCGGR_SP1_Q6									CAGCTG_AP4_Q5
29035	C16orf72	chromosome 16 open reading frame 72	GGGCGGR_SP1_Q6
3178	HNRNPA1	heterogeneous nuclear ribonucleoprotein A1	GGGCGGR_SP1_Q6
1951	CELSR3	cadherin, EGF LAG seven-pass G-type receptor 3 (flamingo homolog, Drosophila)	GGGCGGR_SP1_Q6
10629	TAF6L	TAF6-like RNA polymerase II, p300/CBP-associated factor (PCAF)-associated factor, 65kDa	GGGCGGR_SP1_Q6
6223	RPS19	ribosomal protein S19	GGGCGGR_SP1_Q6
1050	CEBPA	CCAAT/enhancer binding protein (C/EBP), alpha	GGGCGGR_SP1_Q6
25847	ANAPC13	anaphase promoting complex subunit 13	GGGCGGR_SP1_Q6
51455	REV1	REV1 homolog (S. cerevisiae)	GGGCGGR_SP1_Q6
6117	RPA1	replication protein A1, 70kDa	GGGCGGR_SP1_Q6
2287	FKBP3	FK506 binding protein 3, 25kDa	GGGCGGR_SP1_Q6
1119	CHKA	choline kinase alpha	GGGCGGR_SP1_Q6
387496	RASL11A	RAS-like, family 11, member A	GGGCGGR_SP1_Q6
2639	GCDH	glutaryl-CoA dehydrogenase	GGGCGGR_SP1_Q6
79709	GLT25D1	glycosyltransferase 25 domain containing 1	GGGCGGR_SP1_Q6
2923	PDIA3	protein disulfide isomerase family A, member 3	GGGCGGR_SP1_Q6
151246	SGOL2	shugoshin-like 2 (S. pombe)	GGGCGGR_SP1_Q6
3421	IDH3G	isocitrate dehydrogenase 3 (NAD+) gamma	GGGCGGR_SP1_Q6
200403	VWA3B	von Willebrand factor A domain containing 3B	GGGCGGR_SP1_Q6
27005	USP21	ubiquitin specific peptidase 21	GGGCGGR_SP1_Q6
8863	PER3	period homolog 3 (Drosophila)	GGGCGGR_SP1_Q6
51258	MRPL51	mitochondrial ribosomal protein L51	GGGCGGR_SP1_Q6
7409	VAV1	vav 1 guanine nucleotide exchange factor	GGGCGGR_SP1_Q6
284086	NEK8	NIMA (never in mitosis gene a)- related kinase 8	GGGCGGR_SP1_Q6
367	AR	androgen receptor	GGGCGGR_SP1_Q6
8396	PIP4K2B	phosphatidylinositol-5-phosphate 4-kinase, type II, beta	GGGCGGR_SP1_Q6
112939	NACC1	nucleus accumbens associated 1, BEN and BTB (POZ) domain containing	GGGCGGR_SP1_Q6
51699	VPS29	vacuolar protein sorting 29 homolog (S. cerevisiae)	GGGCGGR_SP1_Q6
117246	FTSJ3	FtsJ homolog 3 (E. coli)	GGGCGGR_SP1_Q6
115825	WDFY2	WD repeat and FYVE domain containing 2	GGGCGGR_SP1_Q6
113235	SLC46A1	solute carrier family 46 (folate transporter), member 1	GGGCGGR_SP1_Q6
56605	ERO1LB	ERO1-like beta (S. cerevisiae)	GGGCGGR_SP1_Q6
819	CAMLG	calcium modulating ligand	GGGCGGR_SP1_Q6
9001	HAP1	huntingtin-associated protein 1	GGGCGGR_SP1_Q6
163732	CITED4	Cbp/p300-interacting transactivator, with Glu/Asp-rich carboxy-terminal domain, 4	GGGCGGR_SP1_Q6
245812	CNPY4	canopy 4 homolog (zebrafish)	GGGCGGR_SP1_Q6
84245	MRI1	methylthioribose-1-phosphate isomerase homolog (S. cerevisiae)	GGGCGGR_SP1_Q6
7112	TMPO	thymopoietin	GGGCGGR_SP1_Q6
3300	DNAJB2	DnaJ (Hsp40) homolog, subfamily B, member 2	GGGCGGR_SP1_Q6
84904	C9orf100	chromosome 9 open reading frame 100	GGGCGGR_SP1_Q6
10987	COPS5	COP9 constitutive photomorphogenic homolog subunit 5 (Arabidopsis)	GGGCGGR_SP1_Q6
54819	ZCCHC10	zinc finger, CCHC domain containing 10	GGGCGGR_SP1_Q6
54443	ANLN	anillin, actin binding protein	GGGCGGR_SP1_Q6
9364	RAB28	RAB28, member RAS oncogene family	GGGCGGR_SP1_Q6
1770	DNAH9	dynein, axonemal, heavy chain 9	GGGCGGR_SP1_Q6
80255	SLC35F5	solute carrier family 35, member F5	GGGCGGR_SP1_Q6
1643	DDB2	damage-specific DNA binding protein 2, 48kDa	GGGCGGR_SP1_Q6
5195	PEX14	peroxisomal biogenesis factor 14	GGGCGGR_SP1_Q6
5372	PMM1	phosphomannomutase 1	GGGCGGR_SP1_Q6
537	ATP6AP1	ATPase, H+ transporting, lysosomal accessory protein 1	GGGCGGR_SP1_Q6
7988	ZNF212	zinc finger protein 212	GGGCGGR_SP1_Q6
79664	NARG2	NMDA receptor regulated 2	GGGCGGR_SP1_Q6
440	ASNS	asparagine synthetase (glutamine-hydrolyzing)	GGGCGGR_SP1_Q6
83451	ABHD11	abhydrolase domain containing 11	GGGCGGR_SP1_Q6
84520	C14orf142	chromosome 14 open reading frame 142	GGGCGGR_SP1_Q6
54953	C1orf27	chromosome 1 open reading frame 27	GGGCGGR_SP1_Q6
23034	SAMD4A	sterile alpha motif domain containing 4A	GGGCGGR_SP1_Q6
55229	PANK4	pantothenate kinase 4	GGGCGGR_SP1_Q6
1891	ECH1	enoyl CoA hydratase 1, peroxisomal	GGGCGGR_SP1_Q6
126731	C1orf96	chromosome 1 open reading frame 96	GGGCGGR_SP1_Q6
23456	ABCB10	ATP-binding cassette, sub-family B (MDR/TAP), member 10	GGGCGGR_SP1_Q6
220134	SKA1	spindle and kinetochore associated complex subunit 1	GGGCGGR_SP1_Q6
284904	SEC14L4	SEC14-like 4 (S. cerevisiae)	GGGCGGR_SP1_Q6
501	ALDH7A1	aldehyde dehydrogenase 7 family, member A1	GGGCGGR_SP1_Q6
51693	TRAPPC2L	trafficking protein particle complex 2-like	GGGCGGR_SP1_Q6
60488	MRPS35	mitochondrial ribosomal protein S35	GGGCGGR_SP1_Q6
6612	SUMO3	SMT3 suppressor of mif two 3 homolog 3 (S. cerevisiae)	GGGCGGR_SP1_Q6
79913	ACTR5	ARP5 actin-related protein 5 homolog (yeast)	GGGCGGR_SP1_Q6
846	CASR	calcium-sensing receptor	GGGCGGR_SP1_Q6
9439	MED23	mediator complex subunit 23	GGGCGGR_SP1_Q6
9873	FCHSD2	FCH and double SH3 domains 2		CAGGTG_E12_Q6	GGGAGGRR_MAZ_Q6	CTTTGT_LEF1_Q2	TTGTTT_FOXO4_01		AACTTT_UNKNOWN	GGGTGGRR_PAX4_03
1756	DMD	dystrophin		CAGGTG_E12_Q6	GGGAGGRR_MAZ_Q6	CTTTGT_LEF1_Q2	TTGTTT_FOXO4_01		AACTTT_UNKNOWN		TGGAAA_NFAT_Q4_01	CAGCTG_AP4_Q5
5099	PCDH7	protocadherin 7		CAGGTG_E12_Q6	GGGAGGRR_MAZ_Q6	CTTTGT_LEF1_Q2	TTGTTT_FOXO4_01		AACTTT_UNKNOWN
3062	HCRTR2	hypocretin (orexin) receptor 2		CAGGTG_E12_Q6	GGGAGGRR_MAZ_Q6	CTTTGT_LEF1_Q2	TTGTTT_FOXO4_01		AACTTT_UNKNOWN
55205	ZNF532	zinc finger protein 532		CAGGTG_E12_Q6	GGGAGGRR_MAZ_Q6	CTTTGT_LEF1_Q2	TTGTTT_FOXO4_01			GGGTGGRR_PAX4_03	TGGAAA_NFAT_Q4_01
2566	GABRG2	gamma-aminobutyric acid (GABA) A receptor, gamma 2		CAGGTG_E12_Q6	GGGAGGRR_MAZ_Q6	CTTTGT_LEF1_Q2	TTGTTT_FOXO4_01			GGGTGGRR_PAX4_03
159195	USP54	ubiquitin specific peptidase 54		CAGGTG_E12_Q6	GGGAGGRR_MAZ_Q6	CTTTGT_LEF1_Q2	TTGTTT_FOXO4_01					CAGCTG_AP4_Q5
2890	GRIA1	glutamate receptor, ionotropic, AMPA 1		CAGGTG_E12_Q6	GGGAGGRR_MAZ_Q6	CTTTGT_LEF1_Q2	TTGTTT_FOXO4_01
667	DST	dystonin		CAGGTG_E12_Q6	GGGAGGRR_MAZ_Q6	CTTTGT_LEF1_Q2	TTGTTT_FOXO4_01
10495	ENOX2	ecto-NOX disulfide-thiol exchanger 2		CAGGTG_E12_Q6	GGGAGGRR_MAZ_Q6	CTTTGT_LEF1_Q2		SCGGAAGY_ELK1_02
283248	RCOR2	REST corepressor 2		CAGGTG_E12_Q6	GGGAGGRR_MAZ_Q6	CTTTGT_LEF1_Q2			AACTTT_UNKNOWN	GGGTGGRR_PAX4_03		CAGCTG_AP4_Q5
5991	RFX3	regulatory factor X, 3 (influences HLA class II expression)		CAGGTG_E12_Q6	GGGAGGRR_MAZ_Q6	CTTTGT_LEF1_Q2			AACTTT_UNKNOWN
2275	FHL3	four and a half LIM domains 3		CAGGTG_E12_Q6	GGGAGGRR_MAZ_Q6	CTTTGT_LEF1_Q2				GGGTGGRR_PAX4_03	TGGAAA_NFAT_Q4_01	CAGCTG_AP4_Q5
84687	PPP1R9B	protein phosphatase 1, regulatory subunit 9B		CAGGTG_E12_Q6	GGGAGGRR_MAZ_Q6	CTTTGT_LEF1_Q2				GGGTGGRR_PAX4_03		CAGCTG_AP4_Q5
79933	SYNPO2L	synaptopodin 2-like		CAGGTG_E12_Q6	GGGAGGRR_MAZ_Q6	CTTTGT_LEF1_Q2				GGGTGGRR_PAX4_03		CAGCTG_AP4_Q5
2534	FYN	FYN oncogene related to SRC, FGR, YES		CAGGTG_E12_Q6	GGGAGGRR_MAZ_Q6	CTTTGT_LEF1_Q2				GGGTGGRR_PAX4_03
54857	GDPD2	glycerophosphodiester phosphodiesterase domain containing 2		CAGGTG_E12_Q6	GGGAGGRR_MAZ_Q6	CTTTGT_LEF1_Q2				GGGTGGRR_PAX4_03
29763	PACSIN3	protein kinase C and casein kinase substrate in neurons 3		CAGGTG_E12_Q6	GGGAGGRR_MAZ_Q6	CTTTGT_LEF1_Q2					TGGAAA_NFAT_Q4_01	CAGCTG_AP4_Q5
4983	OPHN1	oligophrenin 1		CAGGTG_E12_Q6	GGGAGGRR_MAZ_Q6	CTTTGT_LEF1_Q2					TGGAAA_NFAT_Q4_01
5585	PKN1	protein kinase N1		CAGGTG_E12_Q6	GGGAGGRR_MAZ_Q6	CTTTGT_LEF1_Q2
84553	C6orf168	chromosome 6 open reading frame 168		CAGGTG_E12_Q6	GGGAGGRR_MAZ_Q6	CTTTGT_LEF1_Q2
161253	REM2	RAS (RAD and GEM)-like GTP binding 2		CAGGTG_E12_Q6	GGGAGGRR_MAZ_Q6	CTTTGT_LEF1_Q2
50937	CDON	Cdon homolog (mouse)		CAGGTG_E12_Q6	GGGAGGRR_MAZ_Q6	CTTTGT_LEF1_Q2
3399	ID3	inhibitor of DNA binding 3, dominant negative helix-loop-helix protein		CAGGTG_E12_Q6	GGGAGGRR_MAZ_Q6		TTGTTT_FOXO4_01	SCGGAAGY_ELK1_02	AACTTT_UNKNOWN	GGGTGGRR_PAX4_03		CAGCTG_AP4_Q5
2258	FGF13	fibroblast growth factor 13		CAGGTG_E12_Q6	GGGAGGRR_MAZ_Q6		TTGTTT_FOXO4_01		AACTTT_UNKNOWN		TGGAAA_NFAT_Q4_01	CAGCTG_AP4_Q5
4862	NPAS2	neuronal PAS domain protein 2		CAGGTG_E12_Q6	GGGAGGRR_MAZ_Q6		TTGTTT_FOXO4_01		AACTTT_UNKNOWN		TGGAAA_NFAT_Q4_01
23526	HMHA1	histocompatibility (minor) HA-1		CAGGTG_E12_Q6	GGGAGGRR_MAZ_Q6		TTGTTT_FOXO4_01			GGGTGGRR_PAX4_03		CAGCTG_AP4_Q5
6093	ROCK1	Rho-associated, coiled-coil containing protein kinase 1		CAGGTG_E12_Q6	GGGAGGRR_MAZ_Q6		TTGTTT_FOXO4_01			GGGTGGRR_PAX4_03		CAGCTG_AP4_Q5
10174	SORBS3	sorbin and SH3 domain containing 3		CAGGTG_E12_Q6	GGGAGGRR_MAZ_Q6		TTGTTT_FOXO4_01				TGGAAA_NFAT_Q4_01	CAGCTG_AP4_Q5
9686	VGLL4	vestigial like 4 (Drosophila)		CAGGTG_E12_Q6	GGGAGGRR_MAZ_Q6		TTGTTT_FOXO4_01				TGGAAA_NFAT_Q4_01
255394	TCP11L2	t-complex 11 (mouse)-like 2		CAGGTG_E12_Q6	GGGAGGRR_MAZ_Q6		TTGTTT_FOXO4_01
5348	FXYD1	FXYD domain containing ion transport regulator 1		CAGGTG_E12_Q6	GGGAGGRR_MAZ_Q6		TTGTTT_FOXO4_01
22941	SHANK2	SH3 and multiple ankyrin repeat domains 2		CAGGTG_E12_Q6	GGGAGGRR_MAZ_Q6			SCGGAAGY_ELK1_02	AACTTT_UNKNOWN		TGGAAA_NFAT_Q4_01
22865	SLITRK3	SLIT and NTRK-like family, member 3		CAGGTG_E12_Q6	GGGAGGRR_MAZ_Q6				AACTTT_UNKNOWN	GGGTGGRR_PAX4_03	TGGAAA_NFAT_Q4_01
4685	NCAM2	neural cell adhesion molecule 2		CAGGTG_E12_Q6	GGGAGGRR_MAZ_Q6				AACTTT_UNKNOWN	GGGTGGRR_PAX4_03
57282	SLC4A10	solute carrier family 4, sodium bicarbonate transporter, member 10		CAGGTG_E12_Q6	GGGAGGRR_MAZ_Q6				AACTTT_UNKNOWN
64651	CSRNP1	cysteine-serine-rich nuclear protein 1		CAGGTG_E12_Q6	GGGAGGRR_MAZ_Q6				AACTTT_UNKNOWN
84668	FAM126A	family with sequence similarity 126, member A		CAGGTG_E12_Q6	GGGAGGRR_MAZ_Q6				AACTTT_UNKNOWN
2911	GRM1	glutamate receptor, metabotropic 1		CAGGTG_E12_Q6	GGGAGGRR_MAZ_Q6				AACTTT_UNKNOWN
3290	HSD11B1	hydroxysteroid (11-beta) dehydrogenase 1		CAGGTG_E12_Q6	GGGAGGRR_MAZ_Q6					GGGTGGRR_PAX4_03	TGGAAA_NFAT_Q4_01	CAGCTG_AP4_Q5
80725	SRCIN1	SRC kinase signaling inhibitor 1		CAGGTG_E12_Q6	GGGAGGRR_MAZ_Q6					GGGTGGRR_PAX4_03		CAGCTG_AP4_Q5
256472	TMEM151A	transmembrane protein 151A		CAGGTG_E12_Q6	GGGAGGRR_MAZ_Q6					GGGTGGRR_PAX4_03
6097	RORC	RAR-related orphan receptor C		CAGGTG_E12_Q6	GGGAGGRR_MAZ_Q6						TGGAAA_NFAT_Q4_01	CAGCTG_AP4_Q5
1608	DGKG	diacylglycerol kinase, gamma 90kDa		CAGGTG_E12_Q6	GGGAGGRR_MAZ_Q6						TGGAAA_NFAT_Q4_01
1826	DSCAM	Down syndrome cell adhesion molecule		CAGGTG_E12_Q6	GGGAGGRR_MAZ_Q6							CAGCTG_AP4_Q5
6000	RGS7	regulator of G-protein signaling 7		CAGGTG_E12_Q6	GGGAGGRR_MAZ_Q6							CAGCTG_AP4_Q5
9645	MICAL2	microtubule associated monoxygenase, calponin and LIM domain containing 2		CAGGTG_E12_Q6	GGGAGGRR_MAZ_Q6
2034	EPAS1	endothelial PAS domain protein 1		CAGGTG_E12_Q6	GGGAGGRR_MAZ_Q6
2582	GALE	UDP-galactose-4-epimerase		CAGGTG_E12_Q6	GGGAGGRR_MAZ_Q6
5498	PPOX	protoporphyrinogen oxidase		CAGGTG_E12_Q6	GGGAGGRR_MAZ_Q6
80781	COL18A1	collagen, type XVIII, alpha 1		CAGGTG_E12_Q6	GGGAGGRR_MAZ_Q6
3061	HCRTR1	hypocretin (orexin) receptor 1		CAGGTG_E12_Q6	GGGAGGRR_MAZ_Q6
284358	MAMSTR	MEF2 activating motif and SAP domain containing transcriptional regulator		CAGGTG_E12_Q6	GGGAGGRR_MAZ_Q6
56659	KCNK13	potassium channel, subfamily K, member 13		CAGGTG_E12_Q6	GGGAGGRR_MAZ_Q6
80320	SP6	Sp6 transcription factor		CAGGTG_E12_Q6	GGGAGGRR_MAZ_Q6
3706	ITPKA	inositol-trisphosphate 3-kinase A		CAGGTG_E12_Q6	GGGAGGRR_MAZ_Q6
219738	C10orf35	chromosome 10 open reading frame 35		CAGGTG_E12_Q6	GGGAGGRR_MAZ_Q6
22882	ZHX2	zinc fingers and homeoboxes 2		CAGGTG_E12_Q6		CTTTGT_LEF1_Q2	TTGTTT_FOXO4_01		AACTTT_UNKNOWN	GGGTGGRR_PAX4_03
3068	HDGF	hepatoma-derived growth factor		CAGGTG_E12_Q6		CTTTGT_LEF1_Q2	TTGTTT_FOXO4_01		AACTTT_UNKNOWN	GGGTGGRR_PAX4_03
138046	RALYL	RALY RNA binding protein-like		CAGGTG_E12_Q6		CTTTGT_LEF1_Q2	TTGTTT_FOXO4_01		AACTTT_UNKNOWN		TGGAAA_NFAT_Q4_01
54886	LPPR1	lipid phosphate phosphatase-related protein type 1		CAGGTG_E12_Q6		CTTTGT_LEF1_Q2	TTGTTT_FOXO4_01		AACTTT_UNKNOWN		TGGAAA_NFAT_Q4_01
8615	USO1	USO1 vesicle docking protein homolog (yeast)		CAGGTG_E12_Q6		CTTTGT_LEF1_Q2	TTGTTT_FOXO4_01		AACTTT_UNKNOWN			CAGCTG_AP4_Q5
8626	TP63	tumor protein p63		CAGGTG_E12_Q6		CTTTGT_LEF1_Q2	TTGTTT_FOXO4_01		AACTTT_UNKNOWN
288	ANK3	ankyrin 3, node of Ranvier (ankyrin G)		CAGGTG_E12_Q6		CTTTGT_LEF1_Q2	TTGTTT_FOXO4_01		AACTTT_UNKNOWN
79845	RNF122	ring finger protein 122		CAGGTG_E12_Q6		CTTTGT_LEF1_Q2	TTGTTT_FOXO4_01		AACTTT_UNKNOWN
121512	FGD4	FYVE, RhoGEF and PH domain containing 4		CAGGTG_E12_Q6		CTTTGT_LEF1_Q2	TTGTTT_FOXO4_01				TGGAAA_NFAT_Q4_01
4974	OMG	oligodendrocyte myelin glycoprotein		CAGGTG_E12_Q6		CTTTGT_LEF1_Q2	TTGTTT_FOXO4_01					CAGCTG_AP4_Q5
5648	MASP1	mannan-binding lectin serine peptidase 1 (C4/C2 activating component of Ra-reactive factor)		CAGGTG_E12_Q6		CTTTGT_LEF1_Q2	TTGTTT_FOXO4_01					CAGCTG_AP4_Q5
5064	PALM	paralemmin		CAGGTG_E12_Q6		CTTTGT_LEF1_Q2	TTGTTT_FOXO4_01
7290	HIRA	HIR histone cell cycle regulation defective homolog A (S. cerevisiae)		CAGGTG_E12_Q6		CTTTGT_LEF1_Q2		SCGGAAGY_ELK1_02
57007	CXCR7	chemokine (C-X-C motif) receptor 7		CAGGTG_E12_Q6		CTTTGT_LEF1_Q2			AACTTT_UNKNOWN		TGGAAA_NFAT_Q4_01
8848	TSC22D1	TSC22 domain family, member 1		CAGGTG_E12_Q6		CTTTGT_LEF1_Q2			AACTTT_UNKNOWN
7547	ZIC3	Zic family member 3		CAGGTG_E12_Q6		CTTTGT_LEF1_Q2			AACTTT_UNKNOWN
166614	DCLK2	doublecortin-like kinase 2		CAGGTG_E12_Q6		CTTTGT_LEF1_Q2					TGGAAA_NFAT_Q4_01
744	MPPED2	metallophosphoesterase domain containing 2		CAGGTG_E12_Q6		CTTTGT_LEF1_Q2						CAGCTG_AP4_Q5
51319	RSRC1	arginine/serine-rich coiled-coil 1		CAGGTG_E12_Q6		CTTTGT_LEF1_Q2						CAGCTG_AP4_Q5
57144	PAK7	p21 protein (Cdc42/Rac)-activated kinase 7		CAGGTG_E12_Q6		CTTTGT_LEF1_Q2						CAGCTG_AP4_Q5
56139	PCDHA10	protocadherin alpha 10		CAGGTG_E12_Q6		CTTTGT_LEF1_Q2
1468	SLC25A10	solute carrier family 25 (mitochondrial carrier; dicarboxylate transporter), member 10		CAGGTG_E12_Q6		CTTTGT_LEF1_Q2
4054	LTBP3	latent transforming growth factor beta binding protein 3		CAGGTG_E12_Q6		CTTTGT_LEF1_Q2
23769	FLRT1	fibronectin leucine rich transmembrane protein 1		CAGGTG_E12_Q6		CTTTGT_LEF1_Q2
4076	CAPRIN1	cell cycle associated protein 1		CAGGTG_E12_Q6		CTTTGT_LEF1_Q2
64400	AKTIP	AKT interacting protein		CAGGTG_E12_Q6			TTGTTT_FOXO4_01	SCGGAAGY_ELK1_02		GGGTGGRR_PAX4_03	TGGAAA_NFAT_Q4_01
178	AGL	amylo-alpha-1, 6-glucosidase, 4-alpha-glucanotransferase		CAGGTG_E12_Q6			TTGTTT_FOXO4_01	SCGGAAGY_ELK1_02
639	PRDM1	PR domain containing 1, with ZNF domain		CAGGTG_E12_Q6			TTGTTT_FOXO4_01		AACTTT_UNKNOWN	GGGTGGRR_PAX4_03	TGGAAA_NFAT_Q4_01
9249	DHRS3	dehydrogenase/reductase (SDR family) member 3		CAGGTG_E12_Q6			TTGTTT_FOXO4_01		AACTTT_UNKNOWN		TGGAAA_NFAT_Q4_01	CAGCTG_AP4_Q5
216	ALDH1A1	aldehyde dehydrogenase 1 family, member A1		CAGGTG_E12_Q6			TTGTTT_FOXO4_01		AACTTT_UNKNOWN		TGGAAA_NFAT_Q4_01	CAGCTG_AP4_Q5
4885	NPTX2	neuronal pentraxin II		CAGGTG_E12_Q6			TTGTTT_FOXO4_01		AACTTT_UNKNOWN
7088	TLE1	transducin-like enhancer of split 1 (E(sp1) homolog, Drosophila)		CAGGTG_E12_Q6			TTGTTT_FOXO4_01		AACTTT_UNKNOWN
8857	FCGBP	Fc fragment of IgG binding protein		CAGGTG_E12_Q6			TTGTTT_FOXO4_01			GGGTGGRR_PAX4_03		CAGCTG_AP4_Q5
8878	SQSTM1	sequestosome 1		CAGGTG_E12_Q6			TTGTTT_FOXO4_01			GGGTGGRR_PAX4_03
54470	ARMCX6	armadillo repeat containing, X-linked 6		CAGGTG_E12_Q6			TTGTTT_FOXO4_01				TGGAAA_NFAT_Q4_01
404093	CUEDC1	CUE domain containing 1		CAGGTG_E12_Q6			TTGTTT_FOXO4_01				TGGAAA_NFAT_Q4_01
2114	ETS2	v-ets erythroblastosis virus E26 oncogene homolog 2 (avian)		CAGGTG_E12_Q6			TTGTTT_FOXO4_01				TGGAAA_NFAT_Q4_01
23503	ZFYVE26	zinc finger, FYVE domain containing 26		CAGGTG_E12_Q6			TTGTTT_FOXO4_01					CAGCTG_AP4_Q5
5294	PIK3CG	phosphoinositide-3-kinase, catalytic, gamma polypeptide		CAGGTG_E12_Q6			TTGTTT_FOXO4_01					CAGCTG_AP4_Q5
10991	SLC38A3	solute carrier family 38, member 3		CAGGTG_E12_Q6			TTGTTT_FOXO4_01					CAGCTG_AP4_Q5
64399	HHIP	hedgehog interacting protein		CAGGTG_E12_Q6			TTGTTT_FOXO4_01
115019	SLC26A9	solute carrier family 26, member 9		CAGGTG_E12_Q6			TTGTTT_FOXO4_01
151126	ZNF385B	zinc finger protein 385B		CAGGTG_E12_Q6			TTGTTT_FOXO4_01
4139	MARK1	MAP/microtubule affinity-regulating kinase 1		CAGGTG_E12_Q6			TTGTTT_FOXO4_01
3918	LAMC2	laminin, gamma 2		CAGGTG_E12_Q6			TTGTTT_FOXO4_01
163486	DENND1B	DENN/MADD domain containing 1B		CAGGTG_E12_Q6			TTGTTT_FOXO4_01
9051	PSTPIP1	proline-serine-threonine phosphatase interacting protein 1		CAGGTG_E12_Q6			TTGTTT_FOXO4_01
80125	CCDC33	coiled-coil domain containing 33		CAGGTG_E12_Q6			TTGTTT_FOXO4_01
9308	CD83	CD83 molecule		CAGGTG_E12_Q6			TTGTTT_FOXO4_01
5355	PLP2	proteolipid protein 2 (colonic epithelium-enriched)		CAGGTG_E12_Q6				SCGGAAGY_ELK1_02		GGGTGGRR_PAX4_03
79892	MCMBP	minichromosome maintenance complex binding protein		CAGGTG_E12_Q6				SCGGAAGY_ELK1_02		GGGTGGRR_PAX4_03
6502	SKP2	S-phase kinase-associated protein 2 (p45)		CAGGTG_E12_Q6				SCGGAAGY_ELK1_02			TGGAAA_NFAT_Q4_01
9589	WTAP	Wilms tumor 1 associated protein		CAGGTG_E12_Q6				SCGGAAGY_ELK1_02
25972	UNC50	unc-50 homolog (C. elegans)		CAGGTG_E12_Q6				SCGGAAGY_ELK1_02
51604	PIGT	phosphatidylinositol glycan anchor biosynthesis, class T		CAGGTG_E12_Q6				SCGGAAGY_ELK1_02
407738	FAM19A1	family with sequence similarity 19 (chemokine (C-C motif)-like), member A1		CAGGTG_E12_Q6					AACTTT_UNKNOWN	GGGTGGRR_PAX4_03	TGGAAA_NFAT_Q4_01
25928	SOSTDC1	sclerostin domain containing 1		CAGGTG_E12_Q6					AACTTT_UNKNOWN	GGGTGGRR_PAX4_03	TGGAAA_NFAT_Q4_01
3799	KIF5B	kinesin family member 5B		CAGGTG_E12_Q6					AACTTT_UNKNOWN	GGGTGGRR_PAX4_03
2876	GPX1	glutathione peroxidase 1		CAGGTG_E12_Q6					AACTTT_UNKNOWN		TGGAAA_NFAT_Q4_01	CAGCTG_AP4_Q5
84628	NTNG2	netrin G2		CAGGTG_E12_Q6					AACTTT_UNKNOWN		TGGAAA_NFAT_Q4_01	CAGCTG_AP4_Q5
1950	EGF	epidermal growth factor		CAGGTG_E12_Q6					AACTTT_UNKNOWN		TGGAAA_NFAT_Q4_01
9844	ELMO1	engulfment and cell motility 1		CAGGTG_E12_Q6					AACTTT_UNKNOWN		TGGAAA_NFAT_Q4_01
5142	PDE4B	phosphodiesterase 4B, cAMP-specific		CAGGTG_E12_Q6					AACTTT_UNKNOWN		TGGAAA_NFAT_Q4_01
55204	GOLPH3L	golgi phosphoprotein 3-like		CAGGTG_E12_Q6					AACTTT_UNKNOWN			CAGCTG_AP4_Q5
57419	SLC24A3	solute carrier family 24 (sodium/potassium/calcium exchanger), member 3		CAGGTG_E12_Q6					AACTTT_UNKNOWN			CAGCTG_AP4_Q5
9378	NRXN1	neurexin 1		CAGGTG_E12_Q6					AACTTT_UNKNOWN
338917	VSX2	visual system homeobox 2		CAGGTG_E12_Q6					AACTTT_UNKNOWN
81553	FAM49A	family with sequence similarity 49, member A		CAGGTG_E12_Q6					AACTTT_UNKNOWN
148	ADRA1A	adrenergic, alpha-1A-, receptor		CAGGTG_E12_Q6					AACTTT_UNKNOWN
25932	CLIC4	chloride intracellular channel 4		CAGGTG_E12_Q6					AACTTT_UNKNOWN
2641	GCG	glucagon		CAGGTG_E12_Q6					AACTTT_UNKNOWN
1005	CDH7	cadherin 7, type 2		CAGGTG_E12_Q6					AACTTT_UNKNOWN
26297	SERGEF	secretion regulating guanine nucleotide exchange factor		CAGGTG_E12_Q6					AACTTT_UNKNOWN
831	CAST	calpastatin		CAGGTG_E12_Q6						GGGTGGRR_PAX4_03	TGGAAA_NFAT_Q4_01	CAGCTG_AP4_Q5
90134	KCNH7	potassium voltage-gated channel, subfamily H (eag-related), member 7		CAGGTG_E12_Q6						GGGTGGRR_PAX4_03	TGGAAA_NFAT_Q4_01
7277	TUBA4A	tubulin, alpha 4a		CAGGTG_E12_Q6						GGGTGGRR_PAX4_03		CAGCTG_AP4_Q5
84879	MFSD2A	major facilitator superfamily domain containing 2A		CAGGTG_E12_Q6						GGGTGGRR_PAX4_03		CAGCTG_AP4_Q5
78999	LRFN4	leucine rich repeat and fibronectin type III domain containing 4		CAGGTG_E12_Q6						GGGTGGRR_PAX4_03
8395	PIP5K1B	phosphatidylinositol-4-phosphate 5-kinase, type I, beta		CAGGTG_E12_Q6						GGGTGGRR_PAX4_03
25897	RNF19A	ring finger protein 19A		CAGGTG_E12_Q6							TGGAAA_NFAT_Q4_01
23213	SULF1	sulfatase 1		CAGGTG_E12_Q6							TGGAAA_NFAT_Q4_01
64062	RBM26	RNA binding motif protein 26		CAGGTG_E12_Q6							TGGAAA_NFAT_Q4_01
374659	HDDC3	HD domain containing 3		CAGGTG_E12_Q6							TGGAAA_NFAT_Q4_01
4023	LPL	lipoprotein lipase		CAGGTG_E12_Q6							TGGAAA_NFAT_Q4_01
89792	GAL3ST3	galactose-3-O-sulfotransferase 3		CAGGTG_E12_Q6							TGGAAA_NFAT_Q4_01
53942	CNTN5	contactin 5		CAGGTG_E12_Q6							TGGAAA_NFAT_Q4_01
51057	WDPCP	WD repeat containing planar cell polarity effector		CAGGTG_E12_Q6								CAGCTG_AP4_Q5
84958	SYTL1	synaptotagmin-like 1		CAGGTG_E12_Q6								CAGCTG_AP4_Q5
7477	WNT7B	wingless-type MMTV integration site family, member 7B		CAGGTG_E12_Q6								CAGCTG_AP4_Q5
8538	BARX2	BARX homeobox 2		CAGGTG_E12_Q6								CAGCTG_AP4_Q5
6867	TACC1	transforming, acidic coiled-coil containing protein 1		CAGGTG_E12_Q6								CAGCTG_AP4_Q5
10169	SERF2	small EDRK-rich factor 2		CAGGTG_E12_Q6								CAGCTG_AP4_Q5
492	ATP2B3	ATPase, Ca++ transporting, plasma membrane 3		CAGGTG_E12_Q6								CAGCTG_AP4_Q5
57165	GJC2	gap junction protein, gamma 2, 47kDa		CAGGTG_E12_Q6								CAGCTG_AP4_Q5
1139	CHRNA7	cholinergic receptor, nicotinic, alpha 7		CAGGTG_E12_Q6
127733	UBXN10	UBX domain protein 10		CAGGTG_E12_Q6
57546	PDP2	pyruvate dehyrogenase phosphatase catalytic subunit 2		CAGGTG_E12_Q6
401474	SAMD12	sterile alpha motif domain containing 12		CAGGTG_E12_Q6
346389	MACC1	metastasis associated in colon cancer 1		CAGGTG_E12_Q6
5151	PDE8A	phosphodiesterase 8A		CAGGTG_E12_Q6
5590	PRKCZ	protein kinase C, zeta		CAGGTG_E12_Q6
25801	GCA	grancalcin, EF-hand calcium binding protein		CAGGTG_E12_Q6
2117	ETV3	ets variant 3		CAGGTG_E12_Q6
284018	C17orf58	chromosome 17 open reading frame 58		CAGGTG_E12_Q6
55252	ASXL2	additional sex combs like 2 (Drosophila)		CAGGTG_E12_Q6
57630	SH3RF1	SH3 domain containing ring finger 1		CAGGTG_E12_Q6
2670	GFAP	glial fibrillary acidic protein		CAGGTG_E12_Q6
54682	MANSC1	MANSC domain containing 1		CAGGTG_E12_Q6
6751	SSTR1	somatostatin receptor 1		CAGGTG_E12_Q6
8514	KCNAB2	potassium voltage-gated channel, shaker-related subfamily, beta member 2		CAGGTG_E12_Q6
9331	B4GALT6	UDP-Gal:betaGlcNAc beta 1,4- galactosyltransferase, polypeptide 6		CAGGTG_E12_Q6
1180	CLCN1	chloride channel 1, skeletal muscle		CAGGTG_E12_Q6
160760	PPTC7	PTC7 protein phosphatase homolog (S. cerevisiae)		CAGGTG_E12_Q6
1285	COL4A3	collagen, type IV, alpha 3 (Goodpasture antigen)		CAGGTG_E12_Q6
1286	COL4A4	collagen, type IV, alpha 4		CAGGTG_E12_Q6
54760	PCSK4	proprotein convertase subtilisin/kexin type 4		CAGGTG_E12_Q6
65217	PCDH15	protocadherin-related 15		CAGGTG_E12_Q6
9353	SLIT2	slit homolog 2 (Drosophila)		CAGGTG_E12_Q6
65009	NDRG4	NDRG family member 4		CAGGTG_E12_Q6
55207	ARL8B	ADP-ribosylation factor-like 8B		CAGGTG_E12_Q6
5604	MAP2K1	mitogen-activated protein kinase kinase 1		CAGGTG_E12_Q6
245973	ATP6V1C2	ATPase, H+ transporting, lysosomal 42kDa, V1 subunit C2		CAGGTG_E12_Q6
55924	C1orf183	chromosome 1 open reading frame 183		CAGGTG_E12_Q6
126306	JSRP1	junctional sarcoplasmic reticulum protein 1		CAGGTG_E12_Q6
1855	DVL1	dishevelled, dsh homolog 1 (Drosophila)		CAGGTG_E12_Q6
286451	YIPF6	Yip1 domain family, member 6		CAGGTG_E12_Q6
5420	PODXL	podocalyxin-like		CAGGTG_E12_Q6
54765	TRIM44	tripartite motif containing 44		CAGGTG_E12_Q6
147650	LINC00085	long intergenic non-protein coding RNA 85		CAGGTG_E12_Q6
84196	USP48	ubiquitin specific peptidase 48		CAGGTG_E12_Q6
653121	ZBTB8A	zinc finger and BTB domain containing 8A		CAGGTG_E12_Q6
3786	KCNQ3	potassium voltage-gated channel, KQT-like subfamily, member 3		CAGGTG_E12_Q6
1816	DRD5	dopamine receptor D5		CAGGTG_E12_Q6
56649	TMPRSS4	transmembrane protease, serine 4		CAGGTG_E12_Q6
64756	ATPAF1	ATP synthase mitochondrial F1 complex assembly factor 1		CAGGTG_E12_Q6
161497	STRC	stereocilin		CAGGTG_E12_Q6
3959	LGALS3BP	lectin, galactoside-binding, soluble, 3 binding protein		CAGGTG_E12_Q6
57140	RNPEPL1	arginyl aminopeptidase (aminopeptidase B)-like 1		CAGGTG_E12_Q6
6447	SCG5	secretogranin V (7B2 protein)		CAGGTG_E12_Q6
92714	ARRDC1	arrestin domain containing 1		CAGGTG_E12_Q6
1021	CDK6	cyclin-dependent kinase 6			GGGAGGRR_MAZ_Q6	CTTTGT_LEF1_Q2	TTGTTT_FOXO4_01		AACTTT_UNKNOWN	GGGTGGRR_PAX4_03	TGGAAA_NFAT_Q4_01
6304	SATB1	SATB homeobox 1			GGGAGGRR_MAZ_Q6	CTTTGT_LEF1_Q2	TTGTTT_FOXO4_01		AACTTT_UNKNOWN
1641	DCX	doublecortin			GGGAGGRR_MAZ_Q6	CTTTGT_LEF1_Q2	TTGTTT_FOXO4_01			GGGTGGRR_PAX4_03		CAGCTG_AP4_Q5
28973	MRPS18B	mitochondrial ribosomal protein S18B			GGGAGGRR_MAZ_Q6	CTTTGT_LEF1_Q2	TTGTTT_FOXO4_01				TGGAAA_NFAT_Q4_01
9175	MAP3K13	mitogen-activated protein kinase kinase kinase 13			GGGAGGRR_MAZ_Q6	CTTTGT_LEF1_Q2	TTGTTT_FOXO4_01					CAGCTG_AP4_Q5
4622	MYH4	myosin, heavy chain 4, skeletal muscle			GGGAGGRR_MAZ_Q6	CTTTGT_LEF1_Q2	TTGTTT_FOXO4_01					CAGCTG_AP4_Q5
7107	GPR137B	G protein-coupled receptor 137B			GGGAGGRR_MAZ_Q6	CTTTGT_LEF1_Q2	TTGTTT_FOXO4_01
56895	AGPAT4	1-acylglycerol-3-phosphate O-acyltransferase 4 (lysophosphatidic acid acyltransferase, delta)			GGGAGGRR_MAZ_Q6	CTTTGT_LEF1_Q2			AACTTT_UNKNOWN	GGGTGGRR_PAX4_03	TGGAAA_NFAT_Q4_01
55692	LUC7L	LUC7-like (S. cerevisiae)			GGGAGGRR_MAZ_Q6	CTTTGT_LEF1_Q2			AACTTT_UNKNOWN	GGGTGGRR_PAX4_03		CAGCTG_AP4_Q5
5577	PRKAR2B	protein kinase, cAMP-dependent, regulatory, type II, beta			GGGAGGRR_MAZ_Q6	CTTTGT_LEF1_Q2			AACTTT_UNKNOWN	GGGTGGRR_PAX4_03
81839	VANGL1	vang-like 1 (van gogh, Drosophila)			GGGAGGRR_MAZ_Q6	CTTTGT_LEF1_Q2			AACTTT_UNKNOWN		TGGAAA_NFAT_Q4_01
5911	RAP2A	RAP2A, member of RAS oncogene family			GGGAGGRR_MAZ_Q6	CTTTGT_LEF1_Q2			AACTTT_UNKNOWN
51684	SUFU	suppressor of fused homolog (Drosophila)			GGGAGGRR_MAZ_Q6	CTTTGT_LEF1_Q2			AACTTT_UNKNOWN
10382	TUBB4A	tubulin, beta 4A class IVa			GGGAGGRR_MAZ_Q6	CTTTGT_LEF1_Q2				GGGTGGRR_PAX4_03		CAGCTG_AP4_Q5
8642	DCHS1	dachsous 1 (Drosophila)			GGGAGGRR_MAZ_Q6	CTTTGT_LEF1_Q2				GGGTGGRR_PAX4_03
4099	MAG	myelin associated glycoprotein			GGGAGGRR_MAZ_Q6	CTTTGT_LEF1_Q2				GGGTGGRR_PAX4_03
23543	RBFOX2	RNA binding protein, fox-1 homolog (C. elegans) 2			GGGAGGRR_MAZ_Q6	CTTTGT_LEF1_Q2					TGGAAA_NFAT_Q4_01	CAGCTG_AP4_Q5
57645	POGK	pogo transposable element with KRAB domain			GGGAGGRR_MAZ_Q6	CTTTGT_LEF1_Q2					TGGAAA_NFAT_Q4_01
2934	GSN	gelsolin			GGGAGGRR_MAZ_Q6	CTTTGT_LEF1_Q2					TGGAAA_NFAT_Q4_01
4808	NHLH2	nescient helix loop helix 2			GGGAGGRR_MAZ_Q6	CTTTGT_LEF1_Q2						CAGCTG_AP4_Q5
9709	HERPUD1	homocysteine-inducible, endoplasmic reticulum stress-inducible, ubiquitin-like domain member 1			GGGAGGRR_MAZ_Q6	CTTTGT_LEF1_Q2
8394	PIP5K1A	phosphatidylinositol-4-phosphate 5-kinase, type I, alpha			GGGAGGRR_MAZ_Q6	CTTTGT_LEF1_Q2
7982	ST7	suppression of tumorigenicity 7			GGGAGGRR_MAZ_Q6	CTTTGT_LEF1_Q2
53354	PANK1	pantothenate kinase 1			GGGAGGRR_MAZ_Q6	CTTTGT_LEF1_Q2
11177	BAZ1A	bromodomain adjacent to zinc finger domain, 1A			GGGAGGRR_MAZ_Q6	CTTTGT_LEF1_Q2
5900	RALGDS	ral guanine nucleotide dissociation stimulator			GGGAGGRR_MAZ_Q6	CTTTGT_LEF1_Q2
4854	NOTCH3	notch 3			GGGAGGRR_MAZ_Q6	CTTTGT_LEF1_Q2
51320	MEX3C	mex-3 homolog C (C. elegans)			GGGAGGRR_MAZ_Q6	CTTTGT_LEF1_Q2
152007	GLIPR2	GLI pathogenesis-related 2			GGGAGGRR_MAZ_Q6	CTTTGT_LEF1_Q2
4520	MTF1	metal-regulatory transcription factor 1			GGGAGGRR_MAZ_Q6		TTGTTT_FOXO4_01	SCGGAAGY_ELK1_02		GGGTGGRR_PAX4_03	TGGAAA_NFAT_Q4_01
10369	CACNG2	calcium channel, voltage-dependent, gamma subunit 2			GGGAGGRR_MAZ_Q6		TTGTTT_FOXO4_01		AACTTT_UNKNOWN	GGGTGGRR_PAX4_03	TGGAAA_NFAT_Q4_01	CAGCTG_AP4_Q5
4081	MAB21L1	mab-21-like 1 (C. elegans)			GGGAGGRR_MAZ_Q6		TTGTTT_FOXO4_01		AACTTT_UNKNOWN		TGGAAA_NFAT_Q4_01
84898	PLXDC2	plexin domain containing 2			GGGAGGRR_MAZ_Q6		TTGTTT_FOXO4_01		AACTTT_UNKNOWN
6785	ELOVL4	ELOVL fatty acid elongase 4			GGGAGGRR_MAZ_Q6		TTGTTT_FOXO4_01		AACTTT_UNKNOWN
7148	TNXB	tenascin XB			GGGAGGRR_MAZ_Q6		TTGTTT_FOXO4_01			GGGTGGRR_PAX4_03	TGGAAA_NFAT_Q4_01
2917	GRM7	glutamate receptor, metabotropic 7			GGGAGGRR_MAZ_Q6		TTGTTT_FOXO4_01			GGGTGGRR_PAX4_03
3667	IRS1	insulin receptor substrate 1			GGGAGGRR_MAZ_Q6		TTGTTT_FOXO4_01			GGGTGGRR_PAX4_03
4440	MSI1	musashi homolog 1 (Drosophila)			GGGAGGRR_MAZ_Q6		TTGTTT_FOXO4_01			GGGTGGRR_PAX4_03
5164	PDK2	pyruvate dehydrogenase kinase, isozyme 2			GGGAGGRR_MAZ_Q6		TTGTTT_FOXO4_01				TGGAAA_NFAT_Q4_01	CAGCTG_AP4_Q5
54476	RNF216	ring finger protein 216			GGGAGGRR_MAZ_Q6		TTGTTT_FOXO4_01					CAGCTG_AP4_Q5
1620	DBC1	deleted in bladder cancer 1			GGGAGGRR_MAZ_Q6		TTGTTT_FOXO4_01					CAGCTG_AP4_Q5
51170	HSD17B11	hydroxysteroid (17-beta) dehydrogenase 11			GGGAGGRR_MAZ_Q6		TTGTTT_FOXO4_01
51504	TRMT112	tRNA methyltransferase 11-2 homolog (S. cerevisiae)			GGGAGGRR_MAZ_Q6			SCGGAAGY_ELK1_02		GGGTGGRR_PAX4_03
7879	RAB7A	RAB7A, member RAS oncogene family			GGGAGGRR_MAZ_Q6			SCGGAAGY_ELK1_02			TGGAAA_NFAT_Q4_01
9820	CUL7	cullin 7			GGGAGGRR_MAZ_Q6			SCGGAAGY_ELK1_02				CAGCTG_AP4_Q5
51105	PHF20L1	PHD finger protein 20-like 1			GGGAGGRR_MAZ_Q6			SCGGAAGY_ELK1_02
84502	JPH4	junctophilin 4			GGGAGGRR_MAZ_Q6			SCGGAAGY_ELK1_02
9738	CCP110	centriolar coiled coil protein 110kDa			GGGAGGRR_MAZ_Q6			SCGGAAGY_ELK1_02
54413	NLGN3	neuroligin 3			GGGAGGRR_MAZ_Q6				AACTTT_UNKNOWN	GGGTGGRR_PAX4_03		CAGCTG_AP4_Q5
176	ACAN	aggrecan			GGGAGGRR_MAZ_Q6				AACTTT_UNKNOWN	GGGTGGRR_PAX4_03
9969	MED13	mediator complex subunit 13			GGGAGGRR_MAZ_Q6				AACTTT_UNKNOWN		TGGAAA_NFAT_Q4_01	CAGCTG_AP4_Q5
55294	FBXW7	F-box and WD repeat domain containing 7			GGGAGGRR_MAZ_Q6				AACTTT_UNKNOWN		TGGAAA_NFAT_Q4_01
3764	KCNJ8	potassium inwardly-rectifying channel, subfamily J, member 8			GGGAGGRR_MAZ_Q6				AACTTT_UNKNOWN		TGGAAA_NFAT_Q4_01
22843	PPM1E	protein phosphatase, Mg2+/Mn2+ dependent, 1E			GGGAGGRR_MAZ_Q6				AACTTT_UNKNOWN			CAGCTG_AP4_Q5
129684	CNTNAP5	contactin associated protein-like 5			GGGAGGRR_MAZ_Q6				AACTTT_UNKNOWN			CAGCTG_AP4_Q5
9475	ROCK2	Rho-associated, coiled-coil containing protein kinase 2			GGGAGGRR_MAZ_Q6				AACTTT_UNKNOWN
8739	HRK	harakiri, BCL2 interacting protein (contains only BH3 domain)			GGGAGGRR_MAZ_Q6				AACTTT_UNKNOWN
6482	ST3GAL1	ST3 beta-galactoside alpha-2,3-sialyltransferase 1			GGGAGGRR_MAZ_Q6				AACTTT_UNKNOWN
375612	LHFPL3	lipoma HMGIC fusion partner-like 3			GGGAGGRR_MAZ_Q6				AACTTT_UNKNOWN
23221	RHOBTB2	Rho-related BTB domain containing 2			GGGAGGRR_MAZ_Q6					GGGTGGRR_PAX4_03		CAGCTG_AP4_Q5
4343	MOV10	Mov10, Moloney leukemia virus 10, homolog (mouse)			GGGAGGRR_MAZ_Q6					GGGTGGRR_PAX4_03
163033	ZNF579	zinc finger protein 579			GGGAGGRR_MAZ_Q6					GGGTGGRR_PAX4_03
273	AMPH	amphiphysin			GGGAGGRR_MAZ_Q6						TGGAAA_NFAT_Q4_01	CAGCTG_AP4_Q5
196883	ADCY4	adenylate cyclase 4			GGGAGGRR_MAZ_Q6						TGGAAA_NFAT_Q4_01	CAGCTG_AP4_Q5
1490	CTGF	connective tissue growth factor			GGGAGGRR_MAZ_Q6						TGGAAA_NFAT_Q4_01
6539	SLC6A12	solute carrier family 6 (neurotransmitter transporter, betaine/GABA), member 12			GGGAGGRR_MAZ_Q6						TGGAAA_NFAT_Q4_01
405	ARNT	aryl hydrocarbon receptor nuclear translocator			GGGAGGRR_MAZ_Q6							CAGCTG_AP4_Q5
79885	HDAC11	histone deacetylase 11			GGGAGGRR_MAZ_Q6							CAGCTG_AP4_Q5
8661	EIF3A	eukaryotic translation initiation factor 3, subunit A			GGGAGGRR_MAZ_Q6
7881	KCNAB1	potassium voltage-gated channel, shaker-related subfamily, beta member 1			GGGAGGRR_MAZ_Q6
402	ARL2	ADP-ribosylation factor-like 2			GGGAGGRR_MAZ_Q6
11072	DUSP14	dual specificity phosphatase 14			GGGAGGRR_MAZ_Q6
4222	MEOX1	mesenchyme homeobox 1			GGGAGGRR_MAZ_Q6
29123	ANKRD11	ankyrin repeat domain 11			GGGAGGRR_MAZ_Q6
9682	KDM4A	lysine (K)-specific demethylase 4A			GGGAGGRR_MAZ_Q6
55843	ARHGAP15	Rho GTPase activating protein 15			GGGAGGRR_MAZ_Q6
80352	RNF39	ring finger protein 39			GGGAGGRR_MAZ_Q6
55720	TSR1	TSR1, 20S rRNA accumulation, homolog (S. cerevisiae)			GGGAGGRR_MAZ_Q6
745	C11orf9	chromosome 11 open reading frame 9			GGGAGGRR_MAZ_Q6
389	RHOC	ras homolog gene family, member C			GGGAGGRR_MAZ_Q6
5511	PPP1R8	protein phosphatase 1, regulatory subunit 8			GGGAGGRR_MAZ_Q6
9754	STARD8	StAR-related lipid transfer (START) domain containing 8			GGGAGGRR_MAZ_Q6
2707	GJB3	gap junction protein, beta 3, 31kDa			GGGAGGRR_MAZ_Q6
114815	SORCS1	sortilin-related VPS10 domain containing receptor 1			GGGAGGRR_MAZ_Q6
2550	GABBR1	gamma-aminobutyric acid (GABA) B receptor, 1			GGGAGGRR_MAZ_Q6
259236	TMIE	transmembrane inner ear			GGGAGGRR_MAZ_Q6
6376	CX3CL1	chemokine (C-X3-C motif) ligand 1			GGGAGGRR_MAZ_Q6
242	ALOX12B	arachidonate 12-lipoxygenase, 12R type			GGGAGGRR_MAZ_Q6
23166	STAB1	stabilin 1			GGGAGGRR_MAZ_Q6
26012	NELF	nasal embryonic LHRH factor			GGGAGGRR_MAZ_Q6
2889	RAPGEF1	Rap guanine nucleotide exchange factor (GEF) 1			GGGAGGRR_MAZ_Q6
286204	CRB2	crumbs homolog 2 (Drosophila)			GGGAGGRR_MAZ_Q6
84552	PARD6G	par-6 partitioning defective 6 homolog gamma (C. elegans)			GGGAGGRR_MAZ_Q6
140606	SELM	selenoprotein M			GGGAGGRR_MAZ_Q6
5725	PTBP1	polypyrimidine tract binding protein 1			GGGAGGRR_MAZ_Q6
6138	RPL15	ribosomal protein L15			GGGAGGRR_MAZ_Q6
4097	MAFG	v-maf musculoaponeurotic fibrosarcoma oncogene homolog G (avian)			GGGAGGRR_MAZ_Q6
2774	GNAL	guanine nucleotide binding protein (G protein), alpha activating activity polypeptide, olfactory type			GGGAGGRR_MAZ_Q6
5413	2005-09-01	septin 5			GGGAGGRR_MAZ_Q6
2121	EVC	Ellis van Creveld syndrome			GGGAGGRR_MAZ_Q6
51473	DCDC2	doublecortin domain containing 2			GGGAGGRR_MAZ_Q6
56902	PNO1	partner of NOB1 homolog (S. cerevisiae)			GGGAGGRR_MAZ_Q6
610	HCN2	hyperpolarization activated cyclic nucleotide-gated potassium channel 2			GGGAGGRR_MAZ_Q6
50848	F11R	F11 receptor				CTTTGT_LEF1_Q2	TTGTTT_FOXO4_01	SCGGAAGY_ELK1_02				CAGCTG_AP4_Q5
22907	DHX30	DEAH (Asp-Glu-Ala-His) box polypeptide 30				CTTTGT_LEF1_Q2	TTGTTT_FOXO4_01	SCGGAAGY_ELK1_02
27314	RAB30	RAB30, member RAS oncogene family				CTTTGT_LEF1_Q2	TTGTTT_FOXO4_01		AACTTT_UNKNOWN	GGGTGGRR_PAX4_03	TGGAAA_NFAT_Q4_01	CAGCTG_AP4_Q5
1003	CDH5	cadherin 5, type 2 (vascular endothelium)				CTTTGT_LEF1_Q2	TTGTTT_FOXO4_01		AACTTT_UNKNOWN		TGGAAA_NFAT_Q4_01
5354	PLP1	proteolipid protein 1				CTTTGT_LEF1_Q2	TTGTTT_FOXO4_01		AACTTT_UNKNOWN			CAGCTG_AP4_Q5
1124	CHN2	chimerin (chimaerin) 2				CTTTGT_LEF1_Q2	TTGTTT_FOXO4_01		AACTTT_UNKNOWN
5908	RAP1B	RAP1B, member of RAS oncogene family				CTTTGT_LEF1_Q2	TTGTTT_FOXO4_01		AACTTT_UNKNOWN
84631	SLITRK2	SLIT and NTRK-like family, member 2				CTTTGT_LEF1_Q2	TTGTTT_FOXO4_01			GGGTGGRR_PAX4_03
57325	CSRP2BP	CSRP2 binding protein				CTTTGT_LEF1_Q2	TTGTTT_FOXO4_01				TGGAAA_NFAT_Q4_01
55684	C9orf86	chromosome 9 open reading frame 86				CTTTGT_LEF1_Q2	TTGTTT_FOXO4_01				TGGAAA_NFAT_Q4_01
57132	CHMP1B	charged multivesicular body protein 1B				CTTTGT_LEF1_Q2	TTGTTT_FOXO4_01
11183	MAP4K5	mitogen-activated protein kinase kinase kinase kinase 5				CTTTGT_LEF1_Q2	TTGTTT_FOXO4_01
10129	FRY	furry homolog (Drosophila)				CTTTGT_LEF1_Q2	TTGTTT_FOXO4_01
2898	GRIK2	glutamate receptor, ionotropic, kainate 2				CTTTGT_LEF1_Q2	TTGTTT_FOXO4_01
55013	CCDC109B	coiled-coil domain containing 109B				CTTTGT_LEF1_Q2	TTGTTT_FOXO4_01
23515	MORC3	MORC family CW-type zinc finger 3				CTTTGT_LEF1_Q2		SCGGAAGY_ELK1_02				CAGCTG_AP4_Q5
10477	UBE2E3	ubiquitin-conjugating enzyme E2E 3				CTTTGT_LEF1_Q2		SCGGAAGY_ELK1_02
904	CCNT1	cyclin T1				CTTTGT_LEF1_Q2		SCGGAAGY_ELK1_02
1964	EIF1AX	eukaryotic translation initiation factor 1A, X-linked				CTTTGT_LEF1_Q2			AACTTT_UNKNOWN	GGGTGGRR_PAX4_03
8503	PIK3R3	phosphoinositide-3-kinase, regulatory subunit 3 (gamma)				CTTTGT_LEF1_Q2			AACTTT_UNKNOWN		TGGAAA_NFAT_Q4_01
56944	OLFML3	olfactomedin-like 3				CTTTGT_LEF1_Q2			AACTTT_UNKNOWN		TGGAAA_NFAT_Q4_01
3482	IGF2R	insulin-like growth factor 2 receptor				CTTTGT_LEF1_Q2			AACTTT_UNKNOWN
2697	GJA1	gap junction protein, alpha 1, 43kDa				CTTTGT_LEF1_Q2			AACTTT_UNKNOWN
83604	TMEM47	transmembrane protein 47				CTTTGT_LEF1_Q2			AACTTT_UNKNOWN
131096	KCNH8	potassium voltage-gated channel, subfamily H (eag-related), member 8				CTTTGT_LEF1_Q2			AACTTT_UNKNOWN
53358	SHC3	SHC (Src homology 2 domain containing) transforming protein 3				CTTTGT_LEF1_Q2			AACTTT_UNKNOWN
10668	CGRRF1	cell growth regulator with ring finger domain 1				CTTTGT_LEF1_Q2			AACTTT_UNKNOWN
116224	FAM122A	family with sequence similarity 122A				CTTTGT_LEF1_Q2			AACTTT_UNKNOWN
120534	C11orf46	chromosome 11 open reading frame 46				CTTTGT_LEF1_Q2			AACTTT_UNKNOWN
5365	PLXNB3	plexin B3				CTTTGT_LEF1_Q2				GGGTGGRR_PAX4_03		CAGCTG_AP4_Q5
84206	MEX3B	mex-3 homolog B (C. elegans)				CTTTGT_LEF1_Q2				GGGTGGRR_PAX4_03
2273	FHL1	four and a half LIM domains 1				CTTTGT_LEF1_Q2				GGGTGGRR_PAX4_03
6840	SVIL	supervillin				CTTTGT_LEF1_Q2					TGGAAA_NFAT_Q4_01	CAGCTG_AP4_Q5
2103	ESRRB	estrogen-related receptor beta				CTTTGT_LEF1_Q2					TGGAAA_NFAT_Q4_01	CAGCTG_AP4_Q5
2295	FOXF2	forkhead box F2				CTTTGT_LEF1_Q2					TGGAAA_NFAT_Q4_01
29094	LGALSL	lectin, galactoside-binding-like				CTTTGT_LEF1_Q2					TGGAAA_NFAT_Q4_01
1647	GADD45A	growth arrest and DNA-damage-inducible, alpha				CTTTGT_LEF1_Q2					TGGAAA_NFAT_Q4_01
388730	TMEM81	transmembrane protein 81				CTTTGT_LEF1_Q2					TGGAAA_NFAT_Q4_01
3914	LAMB3	laminin, beta 3				CTTTGT_LEF1_Q2					TGGAAA_NFAT_Q4_01
4841	NONO	non-POU domain containing, octamer-binding				CTTTGT_LEF1_Q2					TGGAAA_NFAT_Q4_01
23253	ANKRD12	ankyrin repeat domain 12				CTTTGT_LEF1_Q2						CAGCTG_AP4_Q5
79812	MMRN2	multimerin 2				CTTTGT_LEF1_Q2						CAGCTG_AP4_Q5
203190	LGI3	leucine-rich repeat LGI family, member 3				CTTTGT_LEF1_Q2						CAGCTG_AP4_Q5
22836	RHOBTB3	Rho-related BTB domain containing 3				CTTTGT_LEF1_Q2
57176	VARS2	valyl-tRNA synthetase 2, mitochondrial (putative)				CTTTGT_LEF1_Q2
55285	RBM41	RNA binding motif protein 41				CTTTGT_LEF1_Q2
835	CASP2	caspase 2, apoptosis-related cysteine peptidase				CTTTGT_LEF1_Q2
29128	UHRF1	ubiquitin-like with PHD and ring finger domains 1				CTTTGT_LEF1_Q2
1399	CRKL	v-crk sarcoma virus CT10 oncogene homolog (avian)-like				CTTTGT_LEF1_Q2
6047	RNF4	ring finger protein 4				CTTTGT_LEF1_Q2
23263	MCF2L	MCF.2 cell line derived transforming sequence-like				CTTTGT_LEF1_Q2
81790	RNF170	ring finger protein 170				CTTTGT_LEF1_Q2
6993	DYNLT1	dynein, light chain, Tctex-type 1				CTTTGT_LEF1_Q2
23137	SMC5	structural maintenance of chromosomes 5				CTTTGT_LEF1_Q2
163	AP2B1	adaptor-related protein complex 2, beta 1 subunit				CTTTGT_LEF1_Q2
60492	CCDC90B	coiled-coil domain containing 90B				CTTTGT_LEF1_Q2
6428	SRSF3	serine/arginine-rich splicing factor 3				CTTTGT_LEF1_Q2
6003	RGS13	regulator of G-protein signaling 13				CTTTGT_LEF1_Q2
6157	RPL27A	ribosomal protein L27a				CTTTGT_LEF1_Q2
132014	IL17RE	interleukin 17 receptor E				CTTTGT_LEF1_Q2
51046	ST8SIA3	ST8 alpha-N-acetyl-neuraminide alpha-2,8-sialyltransferase 3				CTTTGT_LEF1_Q2
9486	CHST10	carbohydrate sulfotransferase 10				CTTTGT_LEF1_Q2
7329	UBE2I	ubiquitin-conjugating enzyme E2I				CTTTGT_LEF1_Q2
79630	C1orf54	chromosome 1 open reading frame 54				CTTTGT_LEF1_Q2
3625	INHBB	inhibin, beta B				CTTTGT_LEF1_Q2
7410	VAV2	vav 2 guanine nucleotide exchange factor				CTTTGT_LEF1_Q2
113174	SAAL1	serum amyloid A-like 1				CTTTGT_LEF1_Q2
57018	CCNL1	cyclin L1				CTTTGT_LEF1_Q2
55664	CDC37L1	cell division cycle 37 homolog (S. cerevisiae)-like 1				CTTTGT_LEF1_Q2
11215	AKAP11	A kinase (PRKA) anchor protein 11				CTTTGT_LEF1_Q2
24147	FJX1	four jointed box 1 (Drosophila)				CTTTGT_LEF1_Q2
199857	ALG14	asparagine-linked glycosylation 14 homolog (S. cerevisiae)				CTTTGT_LEF1_Q2
2831	NPBWR1	neuropeptides B/W receptor 1				CTTTGT_LEF1_Q2
54799	MBTD1	mbt domain containing 1				CTTTGT_LEF1_Q2
9766	KIAA0247	KIAA0247				CTTTGT_LEF1_Q2
5886	RAD23A	RAD23 homolog A (S. cerevisiae)					TTGTTT_FOXO4_01	SCGGAAGY_ELK1_02	AACTTT_UNKNOWN	GGGTGGRR_PAX4_03	TGGAAA_NFAT_Q4_01
1513	CTSK	cathepsin K					TTGTTT_FOXO4_01	SCGGAAGY_ELK1_02			TGGAAA_NFAT_Q4_01
55793	FAM63A	family with sequence similarity 63, member A					TTGTTT_FOXO4_01	SCGGAAGY_ELK1_02				CAGCTG_AP4_Q5
9054	NFS1	NFS1 nitrogen fixation 1 homolog (S. cerevisiae)					TTGTTT_FOXO4_01	SCGGAAGY_ELK1_02
3479	IGF1	insulin-like growth factor 1 (somatomedin C)					TTGTTT_FOXO4_01		AACTTT_UNKNOWN	GGGTGGRR_PAX4_03	TGGAAA_NFAT_Q4_01	CAGCTG_AP4_Q5
5087	PBX1	pre-B-cell leukemia homeobox 1					TTGTTT_FOXO4_01		AACTTT_UNKNOWN	GGGTGGRR_PAX4_03
79698	ZMAT4	zinc finger, matrin-type 4					TTGTTT_FOXO4_01		AACTTT_UNKNOWN	GGGTGGRR_PAX4_03
9191	DEDD	death effector domain containing					TTGTTT_FOXO4_01		AACTTT_UNKNOWN	GGGTGGRR_PAX4_03
55504	TNFRSF19	tumor necrosis factor receptor superfamily, member 19					TTGTTT_FOXO4_01		AACTTT_UNKNOWN		TGGAAA_NFAT_Q4_01	CAGCTG_AP4_Q5
1600	DAB1	disabled homolog 1 (Drosophila)					TTGTTT_FOXO4_01		AACTTT_UNKNOWN		TGGAAA_NFAT_Q4_01
51477	ISYNA1	inositol-3-phosphate synthase 1					TTGTTT_FOXO4_01		AACTTT_UNKNOWN		TGGAAA_NFAT_Q4_01
26137	ZBTB20	zinc finger and BTB domain containing 20					TTGTTT_FOXO4_01		AACTTT_UNKNOWN			CAGCTG_AP4_Q5
84189	SLITRK6	SLIT and NTRK-like family, member 6					TTGTTT_FOXO4_01		AACTTT_UNKNOWN			CAGCTG_AP4_Q5
11343	MGLL	monoglyceride lipase					TTGTTT_FOXO4_01		AACTTT_UNKNOWN			CAGCTG_AP4_Q5
222008	VSTM2A	V-set and transmembrane domain containing 2A					TTGTTT_FOXO4_01		AACTTT_UNKNOWN			CAGCTG_AP4_Q5
83450	LRRC48	leucine rich repeat containing 48					TTGTTT_FOXO4_01		AACTTT_UNKNOWN
146691	TOM1L2	target of myb1-like 2 (chicken)					TTGTTT_FOXO4_01		AACTTT_UNKNOWN
22929	SEPHS1	selenophosphate synthetase 1					TTGTTT_FOXO4_01		AACTTT_UNKNOWN
50508	NOX3	NADPH oxidase 3					TTGTTT_FOXO4_01		AACTTT_UNKNOWN
51678	MPP6	membrane protein, palmitoylated 6 (MAGUK p55 subfamily member 6)					TTGTTT_FOXO4_01		AACTTT_UNKNOWN
8404	SPARCL1	SPARC-like 1 (hevin)					TTGTTT_FOXO4_01		AACTTT_UNKNOWN
84253	GARNL3	GTPase activating Rap/RanGAP domain-like 3					TTGTTT_FOXO4_01		AACTTT_UNKNOWN
845	CASQ2	calsequestrin 2 (cardiac muscle)					TTGTTT_FOXO4_01		AACTTT_UNKNOWN
91752	ZNF804A	zinc finger protein 804A					TTGTTT_FOXO4_01		AACTTT_UNKNOWN
23593	HEBP2	heme binding protein 2					TTGTTT_FOXO4_01			GGGTGGRR_PAX4_03	TGGAAA_NFAT_Q4_01
9786	KIAA0586	KIAA0586					TTGTTT_FOXO4_01			GGGTGGRR_PAX4_03	TGGAAA_NFAT_Q4_01
51186	WBP5	WW domain binding protein 5					TTGTTT_FOXO4_01			GGGTGGRR_PAX4_03
4846	NOS3	nitric oxide synthase 3 (endothelial cell)					TTGTTT_FOXO4_01			GGGTGGRR_PAX4_03
54716	SLC6A20	solute carrier family 6 (proline IMINO transporter), member 20					TTGTTT_FOXO4_01			GGGTGGRR_PAX4_03
23348	DOCK9	dedicator of cytokinesis 9					TTGTTT_FOXO4_01				TGGAAA_NFAT_Q4_01	CAGCTG_AP4_Q5
2012	EMP1	epithelial membrane protein 1					TTGTTT_FOXO4_01				TGGAAA_NFAT_Q4_01
2290	FOXG1	forkhead box G1					TTGTTT_FOXO4_01				TGGAAA_NFAT_Q4_01
7458	EIF4H	eukaryotic translation initiation factor 4H					TTGTTT_FOXO4_01				TGGAAA_NFAT_Q4_01
2335	FN1	fibronectin 1					TTGTTT_FOXO4_01				TGGAAA_NFAT_Q4_01
10606	PAICS	phosphoribosylaminoimidazole carboxylase, phosphoribosylaminoimidazole succinocarboxamide synthetase					TTGTTT_FOXO4_01					CAGCTG_AP4_Q5
79446	WDR25	WD repeat domain 25					TTGTTT_FOXO4_01					CAGCTG_AP4_Q5
2977	GUCY1A2	guanylate cyclase 1, soluble, alpha 2					TTGTTT_FOXO4_01
23387	SIK3	SIK family kinase 3					TTGTTT_FOXO4_01
79609	METTL21D	methyltransferase like 21D					TTGTTT_FOXO4_01
5243	ABCB1	ATP-binding cassette, sub-family B (MDR/TAP), member 1					TTGTTT_FOXO4_01
7010	TEK	TEK tyrosine kinase, endothelial					TTGTTT_FOXO4_01
55322	C5orf22	chromosome 5 open reading frame 22					TTGTTT_FOXO4_01
55103	RALGPS2	Ral GEF with PH domain and SH3 binding motif 2					TTGTTT_FOXO4_01
51655	RASD1	RAS, dexamethasone-induced 1					TTGTTT_FOXO4_01
6303	SAT1	spermidine/spermine N1-acetyltransferase 1					TTGTTT_FOXO4_01
137868	SGCZ	sarcoglycan, zeta					TTGTTT_FOXO4_01
83660	TLN2	talin 2					TTGTTT_FOXO4_01
63973	NEUROG2	neurogenin 2					TTGTTT_FOXO4_01
64102	TNMD	tenomodulin					TTGTTT_FOXO4_01
8444	DYRK3	dual-specificity tyrosine-(Y)-phosphorylation regulated kinase 3					TTGTTT_FOXO4_01
80222	TARS2	threonyl-tRNA synthetase 2, mitochondrial (putative)					TTGTTT_FOXO4_01
5764	PTN	pleiotrophin					TTGTTT_FOXO4_01
4848	CNOT2	CCR4-NOT transcription complex, subunit 2					TTGTTT_FOXO4_01
92737	DNER	delta/notch-like EGF repeat containing					TTGTTT_FOXO4_01
9349	RPL23	ribosomal protein L23					TTGTTT_FOXO4_01
10418	SPON1	spondin 1, extracellular matrix protein					TTGTTT_FOXO4_01
4625	MYH7	myosin, heavy chain 7, cardiac muscle, beta					TTGTTT_FOXO4_01
65267	WNK3	WNK lysine deficient protein kinase 3					TTGTTT_FOXO4_01
9957	HS3ST1	heparan sulfate (glucosamine) 3-O-sulfotransferase 1					TTGTTT_FOXO4_01
63951	DMRTA1	DMRT-like family A1					TTGTTT_FOXO4_01
23048	FNBP1	formin binding protein 1					TTGTTT_FOXO4_01
53407	STX18	syntaxin 18					TTGTTT_FOXO4_01
79823	CAMKMT	calmodulin-lysine N-methyltransferase					TTGTTT_FOXO4_01
23017	FAIM2	Fas apoptotic inhibitory molecule 2					TTGTTT_FOXO4_01
65003	MRPL11	mitochondrial ribosomal protein L11					TTGTTT_FOXO4_01
25876	SPEF1	sperm flagellar 1					TTGTTT_FOXO4_01
55571	C2orf29	chromosome 2 open reading frame 29					TTGTTT_FOXO4_01
4750	NEK1	NIMA (never in mitosis gene a)-related kinase 1					TTGTTT_FOXO4_01
55656	INTS8	integrator complex subunit 8					TTGTTT_FOXO4_01
54491	FAM105A	family with sequence similarity 105, member A					TTGTTT_FOXO4_01
257160	RNF214	ring finger protein 214					TTGTTT_FOXO4_01
54739	XAF1	XIAP associated factor 1					TTGTTT_FOXO4_01
27199	OXGR1	oxoglutarate (alpha-ketoglutarate) receptor 1					TTGTTT_FOXO4_01
79858	NEK11	NIMA (never in mitosis gene a)- related kinase 11					TTGTTT_FOXO4_01
53944	CSNK1G1	casein kinase 1, gamma 1					TTGTTT_FOXO4_01
5681	PSKH1	protein serine kinase H1					TTGTTT_FOXO4_01
100505741	SPATA1	spermatogenesis associated 1					TTGTTT_FOXO4_01
10268	RAMP3	receptor (G protein-coupled) activity modifying protein 3					TTGTTT_FOXO4_01
10463	SLC30A9	solute carrier family 30 (zinc transporter), member 9					TTGTTT_FOXO4_01
55212	BBS7	Bardet-Biedl syndrome 7					TTGTTT_FOXO4_01
55778	ZNF839	zinc finger protein 839					TTGTTT_FOXO4_01
8507	ENC1	ectodermal-neural cortex 1 (with BTB-like domain)					TTGTTT_FOXO4_01
10627	MYL12A	myosin, light chain 12A, regulatory, non-sarcomeric						SCGGAAGY_ELK1_02	AACTTT_UNKNOWN
23325	KIAA1033	KIAA1033						SCGGAAGY_ELK1_02	AACTTT_UNKNOWN
60526	C2orf43	chromosome 2 open reading frame 43						SCGGAAGY_ELK1_02	AACTTT_UNKNOWN
144108	SPTY2D1	SPT2, Suppressor of Ty, domain containing 1 (S. cerevisiae)						SCGGAAGY_ELK1_02		GGGTGGRR_PAX4_03		CAGCTG_AP4_Q5
10300	KATNB1	katanin p80 (WD repeat containing) subunit B 1						SCGGAAGY_ELK1_02		GGGTGGRR_PAX4_03
8907	AP1M1	adaptor-related protein complex 1, mu 1 subunit						SCGGAAGY_ELK1_02		GGGTGGRR_PAX4_03
55250	ELP2	elongation protein 2 homolog (S. cerevisiae)						SCGGAAGY_ELK1_02		GGGTGGRR_PAX4_03
24139	EML2	echinoderm microtubule associated protein like 2						SCGGAAGY_ELK1_02		GGGTGGRR_PAX4_03
57650	KIAA1524	KIAA1524						SCGGAAGY_ELK1_02		GGGTGGRR_PAX4_03
64708	COPS7B	COP9 constitutive photomorphogenic homolog subunit 7B (Arabidopsis)						SCGGAAGY_ELK1_02		GGGTGGRR_PAX4_03
27044	SND1	staphylococcal nuclease and tudor domain containing 1						SCGGAAGY_ELK1_02			TGGAAA_NFAT_Q4_01
64215	DNAJC1	DnaJ (Hsp40) homolog, subfamily C, member 1						SCGGAAGY_ELK1_02				CAGCTG_AP4_Q5
84515	MCM8	minichromosome maintenance complex component 8						SCGGAAGY_ELK1_02
51605	TRMT6	tRNA methyltransferase 6 homolog (S. cerevisiae)						SCGGAAGY_ELK1_02
11196	SEC23IP	SEC23 interacting protein						SCGGAAGY_ELK1_02
56905	C15orf39	chromosome 15 open reading frame 39						SCGGAAGY_ELK1_02
593	BCKDHA	branched chain keto acid dehydrogenase E1, alpha polypeptide						SCGGAAGY_ELK1_02
1933	EEF1B2	eukaryotic translation elongation factor 1 beta 2						SCGGAAGY_ELK1_02
206358	SLC36A1	solute carrier family 36 (proton/amino acid symporter), member 1						SCGGAAGY_ELK1_02
7249	TSC2	tuberous sclerosis 2						SCGGAAGY_ELK1_02
4738	NEDD8	neural precursor cell expressed, developmentally down-regulated 8						SCGGAAGY_ELK1_02
1477	CSTF1	cleavage stimulation factor, 3' pre-RNA, subunit 1, 50kDa						SCGGAAGY_ELK1_02
5828	PEX2	peroxisomal biogenesis factor 2						SCGGAAGY_ELK1_02
1070	CETN3	centrin, EF-hand protein, 3						SCGGAAGY_ELK1_02
27097	TAF5L	TAF5-like RNA polymerase II, p300/CBP-associated factor (PCAF)-associated factor, 65kDa						SCGGAAGY_ELK1_02
2958	GTF2A2	general transcription factor IIA, 2, 12kDa						SCGGAAGY_ELK1_02
7388	UQCRH	ubiquinol-cytochrome c reductase hinge protein						SCGGAAGY_ELK1_02
6222	RPS18	ribosomal protein S18						SCGGAAGY_ELK1_02
6293	VPS52	vacuolar protein sorting 52 homolog (S. cerevisiae)						SCGGAAGY_ELK1_02
54499	TMCO1	transmembrane and coiled-coil domains 1						SCGGAAGY_ELK1_02
55161	TMEM33	transmembrane protein 33						SCGGAAGY_ELK1_02
79903	NAA60	N(alpha)-acetyltransferase 60, NatF catalytic subunit						SCGGAAGY_ELK1_02
7571	ZNF23	zinc finger protein 23 (KOX 16)						SCGGAAGY_ELK1_02
54552	GNL3L	guanine nucleotide binding protein-like 3 (nucleolar)-like						SCGGAAGY_ELK1_02
7216	TRO	trophinin						SCGGAAGY_ELK1_02
55696	RBM22	RNA binding motif protein 22						SCGGAAGY_ELK1_02
79886	C9orf82	chromosome 9 open reading frame 82						SCGGAAGY_ELK1_02
80817	CEP44	centrosomal protein 44kDa						SCGGAAGY_ELK1_02
54883	CWC25	CWC25 spliceosome-associated protein homolog (S. cerevisiae)						SCGGAAGY_ELK1_02
2773	GNAI3	guanine nucleotide binding protein (G protein), alpha inhibiting activity polypeptide 3						SCGGAAGY_ELK1_02
1355	COX15	COX15 homolog, cytochrome c oxidase assembly protein (yeast)						SCGGAAGY_ELK1_02
151011	2010-09-01	septin 10						SCGGAAGY_ELK1_02
3035	HARS	histidyl-tRNA synthetase						SCGGAAGY_ELK1_02
54978	C2orf18	chromosome 2 open reading frame 18						SCGGAAGY_ELK1_02
116092	DNTTIP1	deoxynucleotidyltransferase, terminal, interacting protein 1						SCGGAAGY_ELK1_02
140461	ASB8	ankyrin repeat and SOCS box containing 8						SCGGAAGY_ELK1_02
25973	PARS2	prolyl-tRNA synthetase 2, mitochondrial (putative)						SCGGAAGY_ELK1_02
84645	C22orf23	chromosome 22 open reading frame 23						SCGGAAGY_ELK1_02
80013	FAM188A	family with sequence similarity 188, member A						SCGGAAGY_ELK1_02
54460	MRPS21	mitochondrial ribosomal protein S21						SCGGAAGY_ELK1_02
345757	FAM174A	family with sequence similarity 174, member A						SCGGAAGY_ELK1_02
59286	UBL5	ubiquitin-like 5						SCGGAAGY_ELK1_02
64421	DCLRE1C	DNA cross-link repair 1C						SCGGAAGY_ELK1_02
26098	C10orf137	chromosome 10 open reading frame 137						SCGGAAGY_ELK1_02
84065	TMEM222	transmembrane protein 222						SCGGAAGY_ELK1_02
[truncated: 1,029 more rows]

## Sheet: D-Striatum 1-2940
Overlap Results
Collection(s):	TFT
# overlaps shown:	10
[truncated: 2,605 more rows]

## Sheet: E-Striatum 2941-4389
Overlap Results
[truncated: 1,272 more rows]

## Sheet: F-cortex-striatum-aNSCs
Overlap Results
[truncated: 1,163 more rows]
