# Supplementary material for: HAT cofactor TRRAP modulates microtubule dynamics via SP1 signaling to prevent neurodegeneration
Source: eLife. 2021 Feb 17;10:e61531. doi: 10.7554/eLife.61531 (PMC7939550; doi:10.7554/eLife.61531)
Supplement: Supplementary file 4. — (A) A list of known Sp1 targets was obtained from the Harmonizome database (Dubey et al., 2015). The common gene names were transformed to Ensembl gene IDs using the online conversion tool from the DAVID database. (B) A comparison between the DEGs in Suppl. File 1A and the known Sp1 targets listed in (A). (C) A comparison between the DEGs in Suppl. File 1B and the known Sp1 targets listed in (A). (D) A comparison between the DEGs in Suppl. File 1D and the known Sp1 targets listed in (A). (E) The GO terms obtained from the list in (D), statistical information, and the list of genes in each group. (F) The KEGG terms obtained from the list in (D), statistical information, and the list of genes in each group. (G) The list includes the results of the Sp1 ChIP-seq in aNSCs. 30% of the most depleted regions in Trrap-D versus control aNSCs for Sp1 were used as cutoff for defining differentially regulated regions. (H) A comparison between the ChIP-seq results in (G) and the known Sp1 targets listed in (A). (I) The overlaps between the ChIP-seq results in (G) and the DEGs in Suppl. File 1D. (J) A comparison between the DEGs in (I) and the known Sp1 targets listed in (A). [file elife-61531-supp4.xlsx]

## Sheet: A-Hermonizome Sp1 targets
From	x	Species	Gene Name
BTD	ENSMUSG00000021900	Mus musculus	biotinidase(Btd)
VPS54	ENSMUSG00000020128	Mus musculus	VPS54 GARP complex subunit(Vps54)
RPLP2	ENSMUSG00000025508	Mus musculus	ribosomal protein, large P2(Rplp2)
VPS53	ENSMUSG00000017288	Mus musculus	VPS53 GARP complex subunit(Vps53)
SNORA65	ENSMUSG00000065124	Mus musculus	small nucleolar RNA, H/ACA box 65(Snora65)
SNORA64	ENSMUSG00000077709	Mus musculus	small nucleolar RNA, H/ACA box 64(Snora64)
BSX	ENSMUSG00000054360	Mus musculus	brain specific homeobox(Bsx)
SNORA70	ENSMUSG00000064981	Mus musculus	small nucleolar RNA, H/ACA box 70(Snora70)
RPLP0	ENSMUSG00000067274	Mus musculus	ribosomal protein, large, P0(Rplp0)
RPLP1	ENSMUSG00000007892	Mus musculus	ribosomal protein, large, P1(Rplp1)
VPS4B	ENSMUSG00000009907	Mus musculus	vacuolar protein sorting 4B(Vps4b)
VPS4A	ENSMUSG00000031913	Mus musculus	vacuolar protein sorting 4A(Vps4a)
PTBP3	ENSMUSG00000028382	Mus musculus	polypyrimidine tract binding protein 3(Ptbp3)
PTBP2	ENSMUSG00000028134	Mus musculus	polypyrimidine tract binding protein 2(Ptbp2)
RAB27B	ENSMUSG00000024511	Mus musculus	RAB27B, member RAS oncogene family(Rab27b)
CCAR2	ENSMUSG00000033712	Mus musculus	cell cycle activator and apoptosis regulator 2(Ccar2)
HIGD1A	ENSMUSG00000038412	Mus musculus	HIG1 domain family, member 1A(Higd1a)
RAB27A	ENSMUSG00000032202	Mus musculus	RAB27A, member RAS oncogene family(Rab27a)
CCAR1	ENSMUSG00000020074	Mus musculus	cell division cycle and apoptosis regulator 1(Ccar1)
TMEFF2	ENSMUSG00000026109	Mus musculus	transmembrane protein with EGF-like and two follistatin-like domains 2(Tmeff2)
SNORA7A	ENSMUSG00000064563	Mus musculus	small nucleolar RNA, H/ACA box 7A(Snora7a)
BSG	ENSMUSG00000023175	Mus musculus	basigin(Bsg)
CYP1A1	ENSMUSG00000032315	Mus musculus	cytochrome P450, family 1, subfamily a, polypeptide 1(Cyp1a1)
VPS45	ENSMUSG00000015747	Mus musculus	vacuolar protein sorting 45(Vps45)
PTBP1	ENSMUSG00000006498	Mus musculus	polypyrimidine tract binding protein 1(Ptbp1)
ANKS3	ENSMUSG00000022515	Mus musculus	ankyrin repeat and sterile alpha motif domain containing 3(Anks3)
SNORA78	ENSMUSG00000089255	Mus musculus	small nucleolar RNA, H/ACA box 7(Snora78)
SIPA1L3	ENSMUSG00000030583	Mus musculus	signal-induced proliferation-associated 1 like 3(Sipa1l3)
VPS41	ENSMUSG00000041236	Mus musculus	VPS41 HOPS complex subunit(Vps41)
MIIP	ENSMUSG00000029022	Mus musculus	migration and invasion inhibitory protein(Miip)
GEM	ENSMUSG00000028214	Mus musculus	GTP binding protein (gene overexpressed in skeletal muscle)(Gem)
UBE2J2	ENSMUSG00000023286	Mus musculus	ubiquitin-conjugating enzyme E2J 2(Ube2j2)
SNORA75	ENSMUSG00000064837	Mus musculus	small nucleolar RNA, H/ACA box 75(Snora75)
SNORA81	ENSMUSG00000087935	Mus musculus	small nucleolar RNA, H/ACA box 81(Snora81)
ADSL	ENSMUSG00000022407	Mus musculus	adenylosuccinate lyase(Adsl)
HIGD2A	ENSMUSG00000025868	Mus musculus	HIG1 domain family, member 2A(Higd2a)
ORAI2	ENSMUSG00000039747	Mus musculus	ORAI calcium release-activated calcium modulator 2(Orai2)
HSD17B11	ENSMUSG00000029311	Mus musculus	hydroxysteroid (17-beta) dehydrogenase 11(Hsd17b11)
ADSS	ENSMUSG00000015961	Mus musculus	adenylosuccinate synthetase, non muscle(Adss)
ORAI1	ENSMUSG00000049686	Mus musculus	ORAI calcium release-activated calcium modulator 1(Orai1)
HSD17B10	ENSMUSG00000025260	Mus musculus	hydroxysteroid (17-beta) dehydrogenase 10(Hsd17b10)
GATSL2	ENSMUSG00000015944	Mus musculus	GATS protein-like 2(Gatsl2)
RALGPS2	ENSMUSG00000026594	Mus musculus	Ral GEF with PH domain and SH3 binding motif 2(Ralgps2)
SDAD1	ENSMUSG00000029415	Mus musculus	SDA1 domain containing 1(Sdad1)
RALGPS1	ENSMUSG00000038831	Mus musculus	Ral GEF with PH domain and SH3 binding motif 1(Ralgps1)
CYP1B1	ENSMUSG00000024087	Mus musculus	cytochrome P450, family 1, subfamily b, polypeptide 1(Cyp1b1)
NFKBID	ENSMUSG00000036931	Mus musculus	nuclear factor of kappa light polypeptide gene enhancer in B cells inhibitor, delta(Nfkbid)
NFKBIE	ENSMUSG00000023947	Mus musculus	nuclear factor of kappa light polypeptide gene enhancer in B cells inhibitor, epsilon(Nfkbie)
HSD17B14	ENSMUSG00000030825	Mus musculus	hydroxysteroid (17-beta) dehydrogenase 14(Hsd17b14)
NFKBIB	ENSMUSG00000030595	Mus musculus	nuclear factor of kappa light polypeptide gene enhancer in B cells inhibitor, beta(Nfkbib)
HSD17B12	ENSMUSG00000027195	Mus musculus	hydroxysteroid (17-beta) dehydrogenase 12(Hsd17b12)
NFKBIA	ENSMUSG00000021025	Mus musculus	nuclear factor of kappa light polypeptide gene enhancer in B cells inhibitor, alpha(Nfkbia)
GSTCD	ENSMUSG00000028018	Mus musculus	glutathione S-transferase, C-terminal domain containing(Gstcd)
MYBL1	ENSMUSG00000025912	Mus musculus	myeloblastosis oncogene-like 1(Mybl1)
FAM19A4	ENSMUSG00000046500	Mus musculus	family with sequence similarity 19, member A4(Fam19a4)
MYBL2	ENSMUSG00000017861	Mus musculus	myeloblastosis oncogene-like 2(Mybl2)
SNORA16A	ENSMUSG00000105911	Mus musculus	small nucleolar RNA, H/ACA box 16A(Snora16a)
SNORA16A	ENSMUSG00000065097	Mus musculus	small nucleolar RNA, H/ACA box 16A(Snora16a)
VPS72	ENSMUSG00000008958	Mus musculus	vacuolar protein sorting 72(Vps72)
ORAI3	ENSMUSG00000043964	Mus musculus	ORAI calcium release-activated calcium modulator 3(Orai3)
KLKB1	ENSMUSG00000031640	Mus musculus	kallikrein B, plasma 1(Klkb1)
CKLF	ENSMUSG00000054400	Mus musculus	chemokine-like factor(Cklf)
DHX8	ENSMUSG00000034931	Mus musculus	DEAH (Asp-Glu-Ala-His) box polypeptide 8(Dhx8)
ZC3H14	ENSMUSG00000021012	Mus musculus	zinc finger CCCH type containing 14(Zc3h14)
DHX9	ENSMUSG00000042699	Mus musculus	DEAH (Asp-Glu-Ala-His) box polypeptide 9(Dhx9)
ZC3H13	ENSMUSG00000022000	Mus musculus	zinc finger CCCH type containing 13(Zc3h13)
ZC3H15	ENSMUSG00000027091	Mus musculus	zinc finger CCCH-type containing 15(Zc3h15)
ZC3H18	ENSMUSG00000017478	Mus musculus	zinc finger CCCH-type containing 18(Zc3h18)
PAIP2	ENSMUSG00000037058	Mus musculus	polyadenylate-binding protein-interacting protein 2(Paip2)
PAIP1	ENSMUSG00000025451	Mus musculus	polyadenylate binding protein-interacting protein 1(Paip1)
GGH	ENSMUSG00000073987	Mus musculus	gamma-glutamyl hydrolase(Ggh)
UBE2L6	ENSMUSG00000027078	Mus musculus	ubiquitin-conjugating enzyme E2L 6(Ube2l6)
PIBF1	ENSMUSG00000022064	Mus musculus	progesterone immunomodulatory binding factor 1(Pibf1)
NDC80	ENSMUSG00000024056	Mus musculus	NDC80 kinetochore complex component(Ndc80)
UBE2L3	ENSMUSG00000038965	Mus musculus	ubiquitin-conjugating enzyme E2L 3(Ube2l3)
GGN	ENSMUSG00000031493	Mus musculus	gametogenetin(Ggn)
EIF4E1B	ENSMUSG00000074895	Mus musculus	eukaryotic translation initiation factor 4E family member 1B(Eif4e1b)
BFAR	ENSMUSG00000022684	Mus musculus	bifunctional apoptosis regulator(Bfar)
BFAR	ENSMUSG00000079737	Mus musculus	bifunctional apoptosis regulator(Bfar)
GNGT2	ENSMUSG00000038811	Mus musculus	guanine nucleotide binding protein (G protein), gamma transducing activity polypeptide 2(Gngt2)
HSPB11	ENSMUSG00000063172	Mus musculus	heat shock protein family B (small), member 11(Hspb11)
PKP3	ENSMUSG00000054065	Mus musculus	plakophilin 3(Pkp3)
PKP4	ENSMUSG00000026991	Mus musculus	plakophilin 4(Pkp4)
POP1	ENSMUSG00000022325	Mus musculus	processing of precursor 1, ribonuclease P/MRP family, (S. cerevisiae)(Pop1)
POP4	ENSMUSG00000030423	Mus musculus	processing of precursor 4, ribonuclease P/MRP family, (S. cerevisiae)(Pop4)
POP5	ENSMUSG00000060152	Mus musculus	processing of precursor 5, ribonuclease P/MRP family (S. cerevisiae)(Pop5)
POP7	ENSMUSG00000029715	Mus musculus	processing of precursor 7, ribonuclease P family, (S. cerevisiae)(Pop7)
SNORA26	ENSMUSG00000093355	Mus musculus	small nucleolar RNA, H/ACA box 26(Snora26)
SNORA24	ENSMUSG00000092730	Mus musculus	small nucleolar RNA, H/ACA box 24(Snora24)
VIPAS39	ENSMUSG00000021038	Mus musculus	VPS33B interacting protein, apical-basolateral polarity regulator, spe-39 homolog(Vipas39)
SNORA21	ENSMUSG00000064901	Mus musculus	small nucleolar RNA, H/ACA box 21(Snora21)
UBE2G1	ENSMUSG00000020794	Mus musculus	ubiquitin-conjugating enzyme E2G 1(Ube2g1)
AP2S1	ENSMUSG00000008036	Mus musculus	adaptor-related protein complex 2, sigma 1 subunit(Ap2s1)
GNPNAT1	ENSMUSG00000037722	Mus musculus	glucosamine-phosphate N-acetyltransferase 1(Gnpnat1)
U2SURP	ENSMUSG00000032407	Mus musculus	U2 snRNP-associated SURP domain containing(U2surp)
UBE2G2	ENSMUSG00000009293	Mus musculus	ubiquitin-conjugating enzyme E2G 2(Ube2g2)
RNF185	ENSMUSG00000020448	Mus musculus	ring finger protein 185(Rnf185)
PCP4L1	ENSMUSG00000038370	Mus musculus	Purkinje cell protein 4-like 1(Pcp4l1)
RNF186	ENSMUSG00000070661	Mus musculus	ring finger protein 186(Rnf186)
RNF187	ENSMUSG00000020496	Mus musculus	ring finger protein 187(Rnf187)
LRRC15	ENSMUSG00000052316	Mus musculus	leucine rich repeat containing 15(Lrrc15)
RNF181	ENSMUSG00000055850	Mus musculus	ring finger protein 181(Rnf181)
LRRC14	ENSMUSG00000033728	Mus musculus	leucine rich repeat containing 14(Lrrc14)
SMAP2	ENSMUSG00000032870	Mus musculus	small ArfGAP 2(Smap2)
SMAP1	ENSMUSG00000026155	Mus musculus	small ArfGAP 1(Smap1)
MGRN1	ENSMUSG00000022517	Mus musculus	mahogunin, ring finger 1(Mgrn1)
SLC22A4	ENSMUSG00000020334	Mus musculus	solute carrier family 22 (organic cation transporter), member 4(Slc22a4)
SLC22A3	ENSMUSG00000023828	Mus musculus	solute carrier family 22 (organic cation transporter), member 3(Slc22a3)
SLC22A5	ENSMUSG00000018900	Mus musculus	solute carrier family 22 (organic cation transporter), member 5(Slc22a5)
TARSL2	ENSMUSG00000030515	Mus musculus	threonyl-tRNA synthetase-like 2(Tarsl2)
MRPL2	ENSMUSG00000002767	Mus musculus	mitochondrial ribosomal protein L2(Mrpl2)
LRRC20	ENSMUSG00000037151	Mus musculus	leucine rich repeat containing 20(Lrrc20)
ATF7IP	ENSMUSG00000030213	Mus musculus	activating transcription factor 7 interacting protein(Atf7ip)
MRPL1	ENSMUSG00000029486	Mus musculus	mitochondrial ribosomal protein L1(Mrpl1)
NFKBIZ	ENSMUSG00000035356	Mus musculus	nuclear factor of kappa light polypeptide gene enhancer in B cells inhibitor, zeta(Nfkbiz)
MRPL4	ENSMUSG00000003299	Mus musculus	mitochondrial ribosomal protein L4(Mrpl4)
MRPL3	ENSMUSG00000032563	Mus musculus	mitochondrial ribosomal protein L3(Mrpl3)
ZC3H7A	ENSMUSG00000037965	Mus musculus	zinc finger CCCH type containing 7 A(Zc3h7a)
SNORA31	ENSMUSG00000065147	Mus musculus	small nucleolar RNA, H/ACA box 31(Snora31)
ZC3H7B	ENSMUSG00000022390	Mus musculus	zinc finger CCCH type containing 7B(Zc3h7b)
SLC22A7	ENSMUSG00000067144	Mus musculus	solute carrier family 22 (organic anion transporter), member 7(Slc22a7)
SNORA33	ENSMUSG00000070063	Mus musculus	small nucleolar RNA, H/ACA box 33(Snora33)
ADNP	ENSMUSG00000051149	Mus musculus	activity-dependent neuroprotective protein(Adnp)
LRRC28	ENSMUSG00000030556	Mus musculus	leucine rich repeat containing 28(Lrrc28)
LRRC27	ENSMUSG00000015980	Mus musculus	leucine rich repeat containing 27(Lrrc27)
MRPL9	ENSMUSG00000028140	Mus musculus	mitochondrial ribosomal protein L9(Mrpl9)
LRRC29	ENSMUSG00000041679	Mus musculus	leucine rich repeat containing 29(Lrrc29)
RFTN1	ENSMUSG00000039316	Mus musculus	raftlin lipid raft linker 1(Rftn1)
LRRC23	ENSMUSG00000030125	Mus musculus	leucine rich repeat containing 23(Lrrc23)
RNF170	ENSMUSG00000013878	Mus musculus	ring finger protein 170(Rnf170)
ELMO2	ENSMUSG00000017670	Mus musculus	engulfment and cell motility 2(Elmo2)
LRRC26	ENSMUSG00000026961	Mus musculus	leucine rich repeat containing 26(Lrrc26)
C8G	ENSMUSG00000015083	Mus musculus	complement component 8, gamma polypeptide(C8g)
LRRC25	ENSMUSG00000049988	Mus musculus	leucine rich repeat containing 25(Lrrc25)
C8A	ENSMUSG00000035031	Mus musculus	complement component 8, alpha polypeptide(C8a)
C8B	ENSMUSG00000029656	Mus musculus	complement component 8, beta polypeptide(C8b)
EREG	ENSMUSG00000029377	Mus musculus	epiregulin(Ereg)
SNORA44	ENSMUSG00000064604	Mus musculus	small nucleolar RNA, H/ACA box 44(Snora44)
SNORA43	ENSMUSG00000064858	Mus musculus	small nucleolar RNA, H/ACA box 43(Snora43)
SNORA43	ENSMUSG00000097052	Mus musculus	small nucleolar RNA, H/ACA box 43(Snora43)
MEGF8	ENSMUSG00000045039	Mus musculus	multiple EGF-like-domains 8(Megf8)
MIDN	ENSMUSG00000035621	Mus musculus	midnolin(Midn)
MEGF9	ENSMUSG00000039270	Mus musculus	multiple EGF-like-domains 9(Megf9)
SNORA41	ENSMUSG00000064602	Mus musculus	small nucleolar RNA, H/ACA box 41(Snora41)
ABHD8	ENSMUSG00000007950	Mus musculus	abhydrolase domain containing 8(Abhd8)
LRRC32	ENSMUSG00000090958	Mus musculus	leucine rich repeat containing 32(Lrrc32)
ABHD6	ENSMUSG00000025277	Mus musculus	abhydrolase domain containing 6(Abhd6)
ABHD5	ENSMUSG00000032540	Mus musculus	abhydrolase domain containing 5(Abhd5)
ABHD4	ENSMUSG00000040997	Mus musculus	abhydrolase domain containing 4(Abhd4)
ERI1	ENSMUSG00000031527	Mus musculus	exoribonuclease 1(Eri1)
ABHD3	ENSMUSG00000002475	Mus musculus	abhydrolase domain containing 3(Abhd3)
ERI2	ENSMUSG00000030929	Mus musculus	exoribonuclease 2(Eri2)
ABHD2	ENSMUSG00000039202	Mus musculus	abhydrolase domain containing 2(Abhd2)
ABHD1	ENSMUSG00000006638	Mus musculus	abhydrolase domain containing 1(Abhd1)
LRRC34	ENSMUSG00000027702	Mus musculus	leucine rich repeat containing 34(Lrrc34)
ERI3	ENSMUSG00000033423	Mus musculus	exoribonuclease 3(Eri3)
COLGALT1	ENSMUSG00000034807	Mus musculus	collagen beta(1-O)galactosyltransferase 1(Colgalt1)
IGSF11	ENSMUSG00000022790	Mus musculus	immunoglobulin superfamily, member 11(Igsf11)
FSBP	ENSMUSG00000094595	Mus musculus	fibrinogen silencer binding protein(Fsbp)
LYPLAL1	ENSMUSG00000039246	Mus musculus	lysophospholipase-like 1(Lyplal1)
GK5	ENSMUSG00000041440	Mus musculus	glycerol kinase 5 (putative)(Gk5)
ABCA12	ENSMUSG00000050296	Mus musculus	ATP-binding cassette, sub-family A (ABC1), member 12(Abca12)
SSRP1	ENSMUSG00000027067	Mus musculus	structure specific recognition protein 1(Ssrp1)
SNORA52	ENSMUSG00000064666	Mus musculus	small nucleolar RNA, H/ACA box 52(Snora52)
LRRC40	ENSMUSG00000063052	Mus musculus	leucine rich repeat containing 40(Lrrc40)
LRRC42	ENSMUSG00000028617	Mus musculus	leucine rich repeat containing 42(Lrrc42)
RNF19A	ENSMUSG00000022280	Mus musculus	ring finger protein 19A(Rnf19a)
LRRC41	ENSMUSG00000028703	Mus musculus	leucine rich repeat containing 41(Lrrc41)
CRNDE	ENSMUSG00000031736	Mus musculus	colorectal neoplasia differentially expressed (non-protein coding)(Crnde)
LRRC43	ENSMUSG00000063409	Mus musculus	leucine rich repeat containing 43(Lrrc43)
LRRC46	ENSMUSG00000020878	Mus musculus	leucine rich repeat containing 46(Lrrc46)
LRRC45	ENSMUSG00000025145	Mus musculus	leucine rich repeat containing 45(Lrrc45)
LRRC48	ENSMUSG00000056598	Mus musculus	leucine rich repeat containing 48(Lrrc48)
LRRC47	ENSMUSG00000029028	Mus musculus	leucine rich repeat containing 47(Lrrc47)
LRRC49	ENSMUSG00000047766	Mus musculus	leucine rich repeat containing 49(Lrrc49)
FSD1	ENSMUSG00000011589	Mus musculus	fibronectin type 3 and SPRY domain-containing protein(Fsd1)
IGSF23	ENSMUSG00000040498	Mus musculus	immunoglobulin superfamily, member 23(Igsf23)
FSD2	ENSMUSG00000038663	Mus musculus	fibronectin type III and SPRY domain containing 2(Fsd2)
GLA	ENSMUSG00000031266	Mus musculus	galactosidase, alpha(Gla)
CSNK1D	ENSMUSG00000025162	Mus musculus	casein kinase 1, delta(Csnk1d)
CSNK1E	ENSMUSG00000022433	Mus musculus	casein kinase 1, epsilon(Csnk1e)
RAB22A	ENSMUSG00000027519	Mus musculus	RAB22A, member RAS oncogene family(Rab22a)
LRRC3C	ENSMUSG00000086545	Mus musculus	leucine rich repeat containing 3C(Lrrc3c)
RNF19B	ENSMUSG00000028793	Mus musculus	ring finger protein 19B(Rnf19b)
PSAT1	ENSMUSG00000024640	Mus musculus	phosphoserine aminotransferase 1(Psat1)
SSNA1	ENSMUSG00000026966	Mus musculus	SS nuclear autoantigen 1(Ssna1)
YKT6	ENSMUSG00000002741	Mus musculus	YKT6 v-SNARE homolog (S. cerevisiae)(Ykt6)
ENHO	ENSMUSG00000028445	Mus musculus	energy homeostasis associated(Enho)
NCBP2	ENSMUSG00000022774	Mus musculus	nuclear cap binding protein subunit 2(Ncbp2)
NCBP1	ENSMUSG00000028330	Mus musculus	nuclear cap binding protein subunit 1(Ncbp1)
ENAH	ENSMUSG00000022995	Mus musculus	enabled homolog (Drosophila)(Enah)
TGFB3	ENSMUSG00000021253	Mus musculus	transforming growth factor, beta 3(Tgfb3)
LRRC4C	ENSMUSG00000050587	Mus musculus	leucine rich repeat containing 4C(Lrrc4c)
TGFB1	ENSMUSG00000002603	Mus musculus	transforming growth factor, beta 1(Tgfb1)
TGFB2	ENSMUSG00000039239	Mus musculus	transforming growth factor, beta 2(Tgfb2)
MINOS1	ENSMUSG00000050608	Mus musculus	mitochondrial inner membrane organizing system 1(Minos1)
FNTB	ENSMUSG00000033373	Mus musculus	farnesyltransferase, CAAX box, beta(Fntb)
RNF141	ENSMUSG00000030788	Mus musculus	ring finger protein 141(Rnf141)
FNTA	ENSMUSG00000015994	Mus musculus	farnesyltransferase, CAAX box, alpha(Fnta)
LRRC56	ENSMUSG00000038637	Mus musculus	leucine rich repeat containing 56(Lrrc56)
MDFIC	ENSMUSG00000041390	Mus musculus	MyoD family inhibitor domain containing(Mdfic)
LRRC57	ENSMUSG00000027286	Mus musculus	leucine rich repeat containing 57(Lrrc57)
FBXO27	ENSMUSG00000037463	Mus musculus	F-box protein 27(Fbxo27)
LRRC58	ENSMUSG00000034158	Mus musculus	leucine rich repeat containing 58(Lrrc58)
FBXO28	ENSMUSG00000047539	Mus musculus	F-box protein 28(Fbxo28)
LRRC59	ENSMUSG00000020869	Mus musculus	leucine rich repeat containing 59(Lrrc59)
TGFBI	ENSMUSG00000035493	Mus musculus	transforming growth factor, beta induced(Tgfbi)
LRRC52	ENSMUSG00000040485	Mus musculus	leucine rich repeat containing 52(Lrrc52)
FBXO25	ENSMUSG00000038365	Mus musculus	F-box protein 25(Fbxo25)
FRS3	ENSMUSG00000023266	Mus musculus	fibroblast growth factor receptor substrate 3(Frs3)
RNF149	ENSMUSG00000048234	Mus musculus	ring finger protein 149(Rnf149)
FBXO24	ENSMUSG00000089984	Mus musculus	F-box protein 24(Fbxo24)
FBXO21	ENSMUSG00000032898	Mus musculus	F-box protein 21(Fbxo21)
FRS2	ENSMUSG00000020170	Mus musculus	fibroblast growth factor receptor substrate 2(Frs2)
FBXO22	ENSMUSG00000032309	Mus musculus	F-box protein 22(Fbxo22)
RNF146	ENSMUSG00000038876	Mus musculus	ring finger protein 146(Rnf146)
RNF145	ENSMUSG00000019189	Mus musculus	ring finger protein 145(Rnf145)
NET1	ENSMUSG00000021215	Mus musculus	neuroepithelial cell transforming gene 1(Net1)
HHIPL2	ENSMUSG00000053461	Mus musculus	hedgehog interacting protein-like 2(Hhipl2)
SLC33A1	ENSMUSG00000027822	Mus musculus	solute carrier family 33 (acetyl-CoA transporter), member 1(Slc33a1)
BAIAP3	ENSMUSG00000047507	Mus musculus	BAI1-associated protein 3(Baiap3)
BAIAP2	ENSMUSG00000025372	Mus musculus	brain-specific angiogenesis inhibitor 1-associated protein 2(Baiap2)
PTPRN2	ENSMUSG00000056553	Mus musculus	protein tyrosine phosphatase, receptor type, N polypeptide 2(Ptprn2)
PKIG	ENSMUSG00000035268	Mus musculus	protein kinase inhibitor, gamma(Pkig)
ENC1	ENSMUSG00000041773	Mus musculus	ectodermal-neural cortex 1(Enc1)
PKIB	ENSMUSG00000019876	Mus musculus	protein kinase inhibitor beta, cAMP dependent, testis specific(Pkib)
PKIA	ENSMUSG00000027499	Mus musculus	protein kinase inhibitor, alpha(Pkia)
MRTO4	ENSMUSG00000028741	Mus musculus	mRNA turnover 4, ribosome maturation factor(Mrto4)
MIB1	ENSMUSG00000024294	Mus musculus	mindbomb E3 ubiquitin protein ligase 1(Mib1)
RNF130	ENSMUSG00000020376	Mus musculus	ring finger protein 130(Rnf130)
FBXO16	ENSMUSG00000034532	Mus musculus	F-box protein 16(Fbxo16)
TIMELESS	ENSMUSG00000039994	Mus musculus	timeless circadian clock 1(Timeless)
FBXO17	ENSMUSG00000030598	Mus musculus	F-box protein 17(Fbxo17)
MIAT	ENSMUSG00000097767	Mus musculus	myocardial infarction associated transcript (non-protein coding)(Miat)
MIB2	ENSMUSG00000029060	Mus musculus	mindbomb E3 ubiquitin protein ligase 2(Mib2)
FBXO18	ENSMUSG00000058594	Mus musculus	F-box protein 18(Fbxo18)
RNF139	ENSMUSG00000037075	Mus musculus	ring finger protein 139(Rnf139)
RNF138	ENSMUSG00000024317	Mus musculus	ring finger protein 138(Rnf138)
NEU1	ENSMUSG00000007038	Mus musculus	neuraminidase 1(Neu1)
NFE2L1	ENSMUSG00000038615	Mus musculus	nuclear factor, erythroid derived 2,-like 1(Nfe2l1)
FBXO15	ENSMUSG00000034391	Mus musculus	F-box protein 15(Fbxo15)
NFE2L2	ENSMUSG00000015839	Mus musculus	nuclear factor, erythroid derived 2, like 2(Nfe2l2)
NEU3	ENSMUSG00000035239	Mus musculus	neuraminidase 3(Neu3)
RNF135	ENSMUSG00000020707	Mus musculus	ring finger protein 135(Rnf135)
LRRC61	ENSMUSG00000073096	Mus musculus	leucine rich repeat containing 61(Lrrc61)
NFE2L3	ENSMUSG00000029832	Mus musculus	nuclear factor, erythroid derived 2, like 3(Nfe2l3)
FBXO11	ENSMUSG00000005371	Mus musculus	F-box protein 11(Fbxo11)
NEU4	ENSMUSG00000034000	Mus musculus	sialidase 4(Neu4)
FBXO40	ENSMUSG00000047746	Mus musculus	F-box protein 40(Fbxo40)
BEX2	ENSMUSG00000042750	Mus musculus	brain expressed X-linked 2(Bex2)
BEX4	ENSMUSG00000047844	Mus musculus	brain expressed X-linked 4(Bex4)
RABGGTB	ENSMUSG00000038975	Mus musculus	Rab geranylgeranyl transferase, b subunit(Rabggtb)
EPM2AIP1	ENSMUSG00000046785	Mus musculus	EPM2A (laforin) interacting protein 1(Epm2aip1)
RABGGTA	ENSMUSG00000040472	Mus musculus	Rab geranylgeranyl transferase, a subunit(Rabggta)
MIA2	ENSMUSG00000021000	Mus musculus	melanoma inhibitory activity 2(Mia2)
MIA2	ENSMUSG00000035349	Mus musculus	melanoma inhibitory activity 2(Mia2)
ISYNA1	ENSMUSG00000019139	Mus musculus	myo-inositol 1-phosphate synthase A1(Isyna1)
RNF166	ENSMUSG00000014470	Mus musculus	ring finger protein 166(Rnf166)
RNF165	ENSMUSG00000025427	Mus musculus	ring finger protein 165(Rnf165)
TFDP2	ENSMUSG00000032411	Mus musculus	transcription factor Dp 2(Tfdp2)
FBXO43	ENSMUSG00000048230	Mus musculus	F-box protein 43(Fbxo43)
FBXO44	ENSMUSG00000029001	Mus musculus	F-box protein 44(Fbxo44)
LRRC71	ENSMUSG00000023084	Mus musculus	leucine rich repeat containing 71(Lrrc71)
RNF169	ENSMUSG00000058761	Mus musculus	ring finger protein 169(Rnf169)
RNF168	ENSMUSG00000014074	Mus musculus	ring finger protein 168(Rnf168)
LRRC73	ENSMUSG00000071073	Mus musculus	leucine rich repeat containing 73(Lrrc73)
FBXO42	ENSMUSG00000028920	Mus musculus	F-box protein 42(Fbxo42)
RNF167	ENSMUSG00000040746	Mus musculus	ring finger protein 167(Rnf167)
FBXO47	ENSMUSG00000070336	Mus musculus	F-box protein 47(Fbxo47)
FBXO48	ENSMUSG00000044966	Mus musculus	F-box protein 48(Fbxo48)
FBXO45	ENSMUSG00000035764	Mus musculus	F-box protein 45(Fbxo45)
AP2M1	ENSMUSG00000022841	Mus musculus	adaptor-related protein complex 2, mu 1 subunit(Ap2m1)
FBXO46	ENSMUSG00000050428	Mus musculus	F-box protein 46(Fbxo46)
ERCC6L	ENSMUSG00000051220	Mus musculus	excision repair cross-complementing rodent repair deficiency complementation group 6 like(Ercc6l)
TFDP1	ENSMUSG00000038482	Mus musculus	transcription factor Dp 1(Tfdp1)
SHPRH	ENSMUSG00000090112	Mus musculus	SNF2 histone linker PHD RING helicase(Shprh)
MEA1	ENSMUSG00000002768	Mus musculus	male enhanced antigen 1(Mea1)
SPPL2B	ENSMUSG00000035206	Mus musculus	signal peptide peptidase like 2B(Sppl2b)
MPHOSPH10	ENSMUSG00000030521	Mus musculus	M-phase phosphoprotein 10 (U3 small nucleolar ribonucleoprotein)(Mphosph10)
SPPL2A	ENSMUSG00000027366	Mus musculus	signal peptide peptidase like 2A(Sppl2a)
FBXO38	ENSMUSG00000042211	Mus musculus	F-box protein 38(Fbxo38)
HDAC5	ENSMUSG00000008855	Mus musculus	histone deacetylase 5(Hdac5)
TRAF3IP2	ENSMUSG00000019842	Mus musculus	TRAF3 interacting protein 2(Traf3ip2)
FBXO39	ENSMUSG00000070388	Mus musculus	F-box protein 39(Fbxo39)
HDAC4	ENSMUSG00000026313	Mus musculus	histone deacetylase 4(Hdac4)
TRAF3IP1	ENSMUSG00000034292	Mus musculus	TRAF3 interacting protein 1(Traf3ip1)
RNF151	ENSMUSG00000008482	Mus musculus	ring finger protein 151(Rnf151)
HDAC3	ENSMUSG00000024454	Mus musculus	histone deacetylase 3(Hdac3)
HDAC2	ENSMUSG00000019777	Mus musculus	histone deacetylase 2(Hdac2)
HDAC1	ENSMUSG00000028800	Mus musculus	histone deacetylase 1(Hdac1)
RNF152	ENSMUSG00000047496	Mus musculus	ring finger protein 152(Rnf152)
SMARCC1	ENSMUSG00000032481	Mus musculus	SWI/SNF related, matrix associated, actin dependent regulator of chromatin, subfamily c, member 1(Smarcc1)
SMARCC2	ENSMUSG00000025369	Mus musculus	SWI/SNF related, matrix associated, actin dependent regulator of chromatin, subfamily c, member 2(Smarcc2)
TRAF3IP3	ENSMUSG00000037318	Mus musculus	TRAF3 interacting protein 3(Traf3ip3)
ADRA1B	ENSMUSG00000050541	Mus musculus	adrenergic receptor, alpha 1b(Adra1b)
FBXO30	ENSMUSG00000047648	Mus musculus	F-box protein 30(Fbxo30)
RNF157	ENSMUSG00000052949	Mus musculus	ring finger protein 157(Rnf157)
FBXO31	ENSMUSG00000052934	Mus musculus	F-box protein 31(Fbxo31)
FBXO32	ENSMUSG00000022358	Mus musculus	F-box protein 32(Fbxo32)
FBXO33	ENSMUSG00000035329	Mus musculus	F-box protein 33(Fbxo33)
FBXO34	ENSMUSG00000037536	Mus musculus	F-box protein 34(Fbxo34)
HDAC8	ENSMUSG00000067567	Mus musculus	histone deacetylase 8(Hdac8)
ADRA1D	ENSMUSG00000027335	Mus musculus	adrenergic receptor, alpha 1d(Adra1d)
FBXO36	ENSMUSG00000073633	Mus musculus	F-box protein 36(Fbxo36)
HDAC7	ENSMUSG00000022475	Mus musculus	histone deacetylase 7(Hdac7)
HDAC6	ENSMUSG00000031161	Mus musculus	histone deacetylase 6(Hdac6)
RSF1	ENSMUSG00000035623	Mus musculus	remodeling and spacing factor 1(Rsf1)
LRRC8A	ENSMUSG00000099041	Mus musculus	leucine rich repeat containing 8A(Lrrc8a)
LRRC8A	ENSMUSG00000007476	Mus musculus	leucine rich repeat containing 8A(Lrrc8a)
LRRC8B	ENSMUSG00000070639	Mus musculus	leucine rich repeat containing 8 family, member B(Lrrc8b)
LRRC8C	ENSMUSG00000054720	Mus musculus	leucine rich repeat containing 8 family, member C(Lrrc8c)
LRRC8D	ENSMUSG00000046079	Mus musculus	leucine rich repeat containing 8D(Lrrc8d)
OGDHL	ENSMUSG00000021913	Mus musculus	oxoglutarate dehydrogenase-like(Ogdhl)
CAD	ENSMUSG00000013629	Mus musculus	carbamoyl-phosphate synthetase 2, aspartate transcarbamylase, and dihydroorotase(Cad)
SH2D4A	ENSMUSG00000053886	Mus musculus	SH2 domain containing 4A(Sh2d4a)
L1TD1	ENSMUSG00000087166	Mus musculus	LINE-1 type transposase domain containing 1(L1td1)
WARS	ENSMUSG00000021266	Mus musculus	tryptophanyl-tRNA synthetase(Wars)
SH2D4B	ENSMUSG00000037833	Mus musculus	SH2 domain containing 4B(Sh2d4b)
PKN3	ENSMUSG00000026785	Mus musculus	protein kinase N3(Pkn3)
RNF103	ENSMUSG00000052656	Mus musculus	ring finger protein 103(Rnf103)
SMAGP	ENSMUSG00000053559	Mus musculus	small cell adhesion glycoprotein(Smagp)
PIWIL2	ENSMUSG00000033644	Mus musculus	piwi-like RNA-mediated gene silencing 2(Piwil2)
VPS16	ENSMUSG00000027411	Mus musculus	VSP16 CORVET/HOPS core subunit(Vps16)
CAT	ENSMUSG00000027187	Mus musculus	catalase(Cat)
VPS11	ENSMUSG00000032127	Mus musculus	VPS11, CORVET/HOPS core subunit(Vps11)
TBL1XR1	ENSMUSG00000027630	Mus musculus	transducin (beta)-like 1X-linked receptor 1(Tbl1xr1)
ERMN	ENSMUSG00000026830	Mus musculus	ermin, ERM-like protein(Ermn)
PKN2	ENSMUSG00000004591	Mus musculus	protein kinase N2(Pkn2)
SLC7A10	ENSMUSG00000030495	Mus musculus	solute carrier family 7 (cationic amino acid transporter, y+ system), member 10(Slc7a10)
GAN	ENSMUSG00000052557	Mus musculus	giant axonal neuropathy(Gan)
NEXN	ENSMUSG00000039103	Mus musculus	nexilin(Nexn)
SLC7A11	ENSMUSG00000027737	Mus musculus	solute carrier family 7 (cationic amino acid transporter, y+ system), member 11(Slc7a11)
GAK	ENSMUSG00000062234	Mus musculus	cyclin G associated kinase(Gak)
SH2D3C	ENSMUSG00000059013	Mus musculus	SH2 domain containing 3C(Sh2d3c)
TNFSF13B	ENSMUSG00000031497	Mus musculus	tumor necrosis factor (ligand) superfamily, member 13b(Tnfsf13b)
PKLR	ENSMUSG00000041237	Mus musculus	pyruvate kinase liver and red blood cell(Pklr)
SNRNP200	ENSMUSG00000003660	Mus musculus	small nuclear ribonucleoprotein 200 (U5)(Snrnp200)
GAA	ENSMUSG00000025579	Mus musculus	glucosidase, alpha, acid(Gaa)
ERN1	ENSMUSG00000020715	Mus musculus	endoplasmic reticulum (ER) to nucleus signalling 1(Ern1)
WASL	ENSMUSG00000029684	Mus musculus	Wiskott-Aldrich syndrome-like (human)(Wasl)
TM4SF1	ENSMUSG00000027800	Mus musculus	transmembrane 4 superfamily member 1(Tm4sf1)
DMC1	ENSMUSG00000022429	Mus musculus	DNA meiotic recombinase 1(Dmc1)
TM4SF4	ENSMUSG00000027801	Mus musculus	transmembrane 4 superfamily member 4(Tm4sf4)
TM4SF5	ENSMUSG00000018919	Mus musculus	transmembrane 4 superfamily member 5(Tm4sf5)
VPS29	ENSMUSG00000029462	Mus musculus	VPS29 retromer complex component(Vps29)
SLC7A6OS	ENSMUSG00000033106	Mus musculus	solute carrier family 7, member 6 opposite strand(Slc7a6os)
FRYL	ENSMUSG00000070733	Mus musculus	FRY like transcription coactivator(Fryl)
HS3ST1	ENSMUSG00000051022	Mus musculus	heparan sulfate (glucosamine) 3-O-sulfotransferase 1(Hs3st1)
ADH5	ENSMUSG00000028138	Mus musculus	alcohol dehydrogenase 5 (class III), chi polypeptide(Adh5)
BRSK2	ENSMUSG00000053046	Mus musculus	BR serine/threonine kinase 2(Brsk2)
UBE2R2	ENSMUSG00000036241	Mus musculus	ubiquitin-conjugating enzyme E2R 2(Ube2r2)
RNF125	ENSMUSG00000033107	Mus musculus	ring finger protein 125(Rnf125)
L3HYPDH	ENSMUSG00000019718	Mus musculus	L-3-hydroxyproline dehydratase (trans-)(L3hypdh)
RNF126	ENSMUSG00000035890	Mus musculus	ring finger protein 126(Rnf126)
RNF123	ENSMUSG00000041528	Mus musculus	ring finger protein 123(Rnf123)
CALML4	ENSMUSG00000032246	Mus musculus	calmodulin-like 4(Calml4)
ADH4	ENSMUSG00000037797	Mus musculus	alcohol dehydrogenase 4 (class II), pi polypeptide(Adh4)
RNF128	ENSMUSG00000031438	Mus musculus	ring finger protein 128(Rnf128)
GGPS1	ENSMUSG00000021302	Mus musculus	geranylgeranyl diphosphate synthase 1(Ggps1)
CEBPZ	ENSMUSG00000024081	Mus musculus	CCAAT/enhancer binding protein zeta(Cebpz)
CCS	ENSMUSG00000034108	Mus musculus	copper chaperone for superoxide dismutase(Ccs)
VPS35	ENSMUSG00000031696	Mus musculus	VPS35 retromer complex component(Vps35)
SCNN1G	ENSMUSG00000000216	Mus musculus	sodium channel, nonvoltage-gated 1 gamma(Scnn1g)
UBTD1	ENSMUSG00000025171	Mus musculus	ubiquitin domain containing 1(Ubtd1)
RNF121	ENSMUSG00000070426	Mus musculus	ring finger protein 121(Rnf121)
RNF122	ENSMUSG00000039328	Mus musculus	ring finger protein 122(Rnf122)
SCNN1A	ENSMUSG00000030340	Mus musculus	sodium channel, nonvoltage-gated 1 alpha(Scnn1a)
UBTD2	ENSMUSG00000044949	Mus musculus	ubiquitin domain containing 2(Ubtd2)
CD5	ENSMUSG00000024669	Mus musculus	CD5 antigen(Cd5)
VPS36	ENSMUSG00000031479	Mus musculus	vacuolar protein sorting 36(Vps36)
VPS39	ENSMUSG00000027291	Mus musculus	VPS39 HOPS complex subunit(Vps39)
GBA	ENSMUSG00000028048	Mus musculus	glucosidase, beta, acid(Gba)
CEBPA	ENSMUSG00000034957	Mus musculus	CCAAT/enhancer binding protein (C/EBP), alpha(Cebpa)
GSTA2	ENSMUSG00000057933	Mus musculus	glutathione S-transferase, alpha 2 (Yc2)(Gsta2)
VPS18	ENSMUSG00000034216	Mus musculus	VPS18 CORVET/HOPS core subunit(Vps18)
RSG1	ENSMUSG00000073733	Mus musculus	REM2 and RAB-like small GTPase 1(Rsg1)
GSTA4	ENSMUSG00000032348	Mus musculus	glutathione S-transferase, alpha 4(Gsta4)
CEBPB	ENSMUSG00000056501	Mus musculus	CCAAT/enhancer binding protein (C/EBP), beta(Cebpb)
CEBPE	ENSMUSG00000052435	Mus musculus	CCAAT/enhancer binding protein (C/EBP), epsilon(Cebpe)
CEBPD	ENSMUSG00000071637	Mus musculus	CCAAT/enhancer binding protein (C/EBP), delta(Cebpd)
CEBPG	ENSMUSG00000056216	Mus musculus	CCAAT/enhancer binding protein (C/EBP), gamma(Cebpg)
CBL	ENSMUSG00000034342	Mus musculus	Casitas B-lineage lymphoma(Cbl)
GRSF1	ENSMUSG00000044221	Mus musculus	G-rich RNA sequence binding factor 1(Grsf1)
BAD	ENSMUSG00000024959	Mus musculus	BCL2-associated agonist of cell death(Bad)
UBE2Q2	ENSMUSG00000032307	Mus musculus	ubiquitin-conjugating enzyme E2Q family member 2(Ube2q2)
UBE2Q1	ENSMUSG00000042572	Mus musculus	ubiquitin-conjugating enzyme E2Q family member 1(Ube2q1)
ADI1	ENSMUSG00000020629	Mus musculus	acireductone dioxygenase 1(Adi1)
RNF114	ENSMUSG00000006418	Mus musculus	ring finger protein 114(Rnf114)
HSP90B1	ENSMUSG00000020048	Mus musculus	heat shock protein 90, beta (Grp94), member 1(Hsp90b1)
RNF115	ENSMUSG00000028098	Mus musculus	ring finger protein 115(Rnf115)
IQCF1	ENSMUSG00000066383	Mus musculus	IQ motif containing F1(Iqcf1)
BAX	ENSMUSG00000003873	Mus musculus	BCL2-associated X protein(Bax)
SDF2L1	ENSMUSG00000022769	Mus musculus	stromal cell-derived factor 2-like 1(Sdf2l1)
VPS28	ENSMUSG00000059323	Mus musculus	vacuolar protein sorting 28(Vps28)
GCA	ENSMUSG00000026893	Mus musculus	grancalcin(Gca)
VPS25	ENSMUSG00000078656	Mus musculus	vacuolar protein sorting 25(Vps25)
RNF111	ENSMUSG00000032217	Mus musculus	ring finger 111(Rnf111)
GLB1L	ENSMUSG00000026200	Mus musculus	galactosidase, beta 1-like(Glb1l)
IL6ST	ENSMUSG00000021756	Mus musculus	interleukin 6 signal transducer(Il6st)
FST	ENSMUSG00000021765	Mus musculus	follistatin(Fst)
CNPPD1	ENSMUSG00000033159	Mus musculus	cyclin Pas1/PHO80 domain containing 1(Cnppd1)
BBX	ENSMUSG00000022641	Mus musculus	bobby sox homolog (Drosophila)(Bbx)
PPCS	ENSMUSG00000028636	Mus musculus	phosphopantothenoylcysteine synthetase(Ppcs)
VPS33B	ENSMUSG00000030534	Mus musculus	vacuolar protein sorting 33B(Vps33b)
VPS33A	ENSMUSG00000029434	Mus musculus	VPS33A CORVET/HOPS core subunit(Vps33a)
LCAT	ENSMUSG00000035237	Mus musculus	lecithin cholesterol acyltransferase(Lcat)
AAGAB	ENSMUSG00000037257	Mus musculus	alpha- and gamma-adaptin binding protein(Aagab)
PLD3	ENSMUSG00000003363	Mus musculus	phospholipase D family, member 3(Pld3)
ANAPC1	ENSMUSG00000014355	Mus musculus	anaphase promoting complex subunit 1(Anapc1)
PLD2	ENSMUSG00000020828	Mus musculus	phospholipase D2(Pld2)
GPR137	ENSMUSG00000024958	Mus musculus	G protein-coupled receptor 137(Gpr137)
ANAPC2	ENSMUSG00000026965	Mus musculus	anaphase promoting complex subunit 2(Anapc2)
PLD1	ENSMUSG00000027695	Mus musculus	phospholipase D1(Pld1)
RPUSD4	ENSMUSG00000032044	Mus musculus	RNA pseudouridylate synthase domain containing 4(Rpusd4)
BCR	ENSMUSG00000009681	Mus musculus	breakpoint cluster region(Bcr)
PRAME	ENSMUSG00000031411	Mus musculus	preferentially expressed antigen in melanoma(Prame)
RPUSD2	ENSMUSG00000027324	Mus musculus	RNA pseudouridylate synthase domain containing 2(Rpusd2)
EMX1	ENSMUSG00000033726	Mus musculus	empty spiracles homeobox 1(Emx1)
ANAPC5	ENSMUSG00000029472	Mus musculus	anaphase-promoting complex subunit 5(Anapc5)
PLD6	ENSMUSG00000043648	Mus musculus	phospholipase D family, member 6(Pld6)
RPUSD3	ENSMUSG00000051169	Mus musculus	RNA pseudouridylate synthase domain containing 3(Rpusd3)
PLD4	ENSMUSG00000052160	Mus musculus	phospholipase D family, member 4(Pld4)
ANAPC4	ENSMUSG00000029176	Mus musculus	anaphase promoting complex subunit 4(Anapc4)
EMX2	ENSMUSG00000043969	Mus musculus	empty spiracles homeobox 2(Emx2)
RPUSD1	ENSMUSG00000041199	Mus musculus	RNA pseudouridylate synthase domain containing 1(Rpusd1)
FAM192A	ENSMUSG00000031774	Mus musculus	family with sequence similarity 192, member A(Fam192a)
APOLD1	ENSMUSG00000090698	Mus musculus	apolipoprotein L domain containing 1(Apold1)
GPR132	ENSMUSG00000021298	Mus musculus	G protein-coupled receptor 132(Gpr132)
DHDH	ENSMUSG00000011382	Mus musculus	dihydrodiol dehydrogenase (dimeric)(Dhdh)
PIAS4	ENSMUSG00000004934	Mus musculus	protein inhibitor of activated STAT 4(Pias4)
PIAS3	ENSMUSG00000028101	Mus musculus	protein inhibitor of activated STAT 3(Pias3)
LCA5	ENSMUSG00000032258	Mus musculus	Leber congenital amaurosis 5 (human)(Lca5)
ATP5C1	ENSMUSG00000025781	Mus musculus	ATP synthase, H+ transporting, mitochondrial F1 complex, gamma polypeptide 1(Atp5c1)
NEK8	ENSMUSG00000017405	Mus musculus	NIMA (never in mitosis gene a)-related expressed kinase 8(Nek8)
NEK9	ENSMUSG00000034290	Mus musculus	NIMA (never in mitosis gene a)-related expressed kinase 9(Nek9)
PIAS2	ENSMUSG00000025423	Mus musculus	protein inhibitor of activated STAT 2(Pias2)
PIAS1	ENSMUSG00000032405	Mus musculus	protein inhibitor of activated STAT 1(Pias1)
ANAPC7	ENSMUSG00000029466	Mus musculus	anaphase promoting complex subunit 7(Anapc7)
NEK4	ENSMUSG00000021918	Mus musculus	NIMA (never in mitosis gene a)-related expressed kinase 4(Nek4)
MDH2	ENSMUSG00000019179	Mus musculus	malate dehydrogenase 2, NAD (mitochondrial)(Mdh2)
NEK6	ENSMUSG00000026749	Mus musculus	NIMA (never in mitosis gene a)-related expressed kinase 6(Nek6)
ZIM2	ENSMUSG00000108113	Mus musculus	zinc finger, imprinted 2(Zim2)
MDH1	ENSMUSG00000020321	Mus musculus	malate dehydrogenase 1, NAD (soluble)(Mdh1)
NEK7	ENSMUSG00000026393	Mus musculus	NIMA (never in mitosis gene a)-related expressed kinase 7(Nek7)
FUS	ENSMUSG00000030795	Mus musculus	fused in sarcoma(Fus)
ALDOA	ENSMUSG00000030695	Mus musculus	aldolase A, fructose-bisphosphate(Aldoa)
DEAF1	ENSMUSG00000058886	Mus musculus	deformed epidermal autoregulatory factor 1 (Drosophila)(Deaf1)
KAZN	ENSMUSG00000040606	Mus musculus	kazrin, periplakin interacting protein(Kazn)
IQCB1	ENSMUSG00000022837	Mus musculus	IQ calmodulin-binding motif containing 1(Iqcb1)
NEK2	ENSMUSG00000026622	Mus musculus	NIMA (never in mitosis gene a)-related expressed kinase 2(Nek2)
CRIPT	ENSMUSG00000024146	Mus musculus	cysteine-rich PDZ-binding protein(Cript)
ALDOC	ENSMUSG00000017390	Mus musculus	aldolase C, fructose-bisphosphate(Aldoc)
NEK1	ENSMUSG00000031644	Mus musculus	NIMA (never in mitosis gene a)-related expressed kinase 1(Nek1)
HUS1	ENSMUSG00000020413	Mus musculus	HUS1 checkpoint clamp component(Hus1)
LRRC75B	ENSMUSG00000046807	Mus musculus	leucine rich repeat containing 75B(Lrrc75b)
GPR142	ENSMUSG00000034677	Mus musculus	G protein-coupled receptor 142(Gpr142)
PPAT	ENSMUSG00000029246	Mus musculus	phosphoribosyl pyrophosphate amidotransferase(Ppat)
FUZ	ENSMUSG00000011658	Mus musculus	fuzzy planar cell polarity protein(Fuz)
PLAA	ENSMUSG00000028577	Mus musculus	phospholipase A2, activating protein(Plaa)
PPAN	ENSMUSG00000004100	Mus musculus	peter pan homolog (Drosophila)(Ppan)
STX12	ENSMUSG00000028879	Mus musculus	syntaxin 12(Stx12)
STX19	ENSMUSG00000047854	Mus musculus	syntaxin 19(Stx19)
STX18	ENSMUSG00000029125	Mus musculus	syntaxin 18(Stx18)
STX17	ENSMUSG00000061455	Mus musculus	syntaxin 17(Stx17)
STX16	ENSMUSG00000027522	Mus musculus	syntaxin 16(Stx16)
STX11	ENSMUSG00000039232	Mus musculus	syntaxin 11(Stx11)
LENG1	ENSMUSG00000078813	Mus musculus	leukocyte receptor cluster (LRC) member 1(Leng1)
COL18A1	ENSMUSG00000001435	Mus musculus	collagen, type XVIII, alpha 1(Col18a1)
GPR155	ENSMUSG00000041762	Mus musculus	G protein-coupled receptor 155(Gpr155)
GPR158	ENSMUSG00000045967	Mus musculus	G protein-coupled receptor 158(Gpr158)
CRIP1	ENSMUSG00000006360	Mus musculus	cysteine-rich protein 1 (intestinal)(Crip1)
OSGEP	ENSMUSG00000006289	Mus musculus	O-sialoglycoprotein endopeptidase(Osgep)
GPR157	ENSMUSG00000047875	Mus musculus	G protein-coupled receptor 157(Gpr157)
CRIP3	ENSMUSG00000023968	Mus musculus	cysteine-rich protein 3(Crip3)
CRIP2	ENSMUSG00000006356	Mus musculus	cysteine rich protein 2(Crip2)
FTO	ENSMUSG00000055932	Mus musculus	fat mass and obesity associated(Fto)
EHBP1	ENSMUSG00000042302	Mus musculus	EH domain binding protein 1(Ehbp1)
GPR150	ENSMUSG00000045509	Mus musculus	G protein-coupled receptor 150(Gpr150)
AARSD1	ENSMUSG00000075528	Mus musculus	alanyl-tRNA synthetase domain containing 1(Aarsd1)
OXSR1	ENSMUSG00000036737	Mus musculus	oxidative-stress responsive 1(Oxsr1)
AFG3L2	ENSMUSG00000024527	Mus musculus	AFG3-like AAA ATPase 2(Afg3l2)
FTX	ENSMUSG00000086370	Mus musculus	Ftx transcript, Xist regulator (non-protein coding)(Ftx)
PPA2	ENSMUSG00000028013	Mus musculus	pyrophosphatase (inorganic) 2(Ppa2)
GPR153	ENSMUSG00000042804	Mus musculus	G protein-coupled receptor 153(Gpr153)
PPA1	ENSMUSG00000020089	Mus musculus	pyrophosphatase (inorganic) 1(Ppa1)
DLX2	ENSMUSG00000023391	Mus musculus	distal-less homeobox 2(Dlx2)
DLX1	ENSMUSG00000041911	Mus musculus	distal-less homeobox 1(Dlx1)
DHFR	ENSMUSG00000021707	Mus musculus	dihydrofolate reductase(Dhfr)
ATP6V0E2	ENSMUSG00000039347	Mus musculus	ATPase, H+ transporting, lysosomal V0 subunit E2(Atp6v0e2)
SRPX2	ENSMUSG00000031253	Mus musculus	sushi-repeat-containing protein, X-linked 2(Srpx2)
PTCD3	ENSMUSG00000063884	Mus musculus	pentatricopeptide repeat domain 3(Ptcd3)
DLX6	ENSMUSG00000029754	Mus musculus	distal-less homeobox 6(Dlx6)
DMTF1	ENSMUSG00000042508	Mus musculus	cyclin D binding myb-like transcription factor 1(Dmtf1)
PTCD2	ENSMUSG00000021650	Mus musculus	pentatricopeptide repeat domain 2(Ptcd2)
DLX5	ENSMUSG00000029755	Mus musculus	distal-less homeobox 5(Dlx5)
PTCD1	ENSMUSG00000029624	Mus musculus	pentatricopeptide repeat domain 1(Ptcd1)
DLX4	ENSMUSG00000020871	Mus musculus	distal-less homeobox 4(Dlx4)
ZIK1	ENSMUSG00000030393	Mus musculus	zinc finger protein interacting with K protein 1(Zik1)
FUK	ENSMUSG00000033703	Mus musculus	fucokinase(Fuk)
CHAF1A	ENSMUSG00000002835	Mus musculus	chromatin assembly factor 1, subunit A (p150)(Chaf1a)
CHAF1B	ENSMUSG00000022945	Mus musculus	chromatin assembly factor 1, subunit B (p60)(Chaf1b)
PLAU	ENSMUSG00000021822	Mus musculus	plasminogen activator, urokinase(Plau)
IER3IP1	ENSMUSG00000090000	Mus musculus	immediate early response 3 interacting protein 1(Ier3ip1)
MYBPC2	ENSMUSG00000038670	Mus musculus	myosin binding protein C, fast-type(Mybpc2)
CPEB2	ENSMUSG00000039782	Mus musculus	cytoplasmic polyadenylation element binding protein 2(Cpeb2)
EID2B	ENSMUSG00000070705	Mus musculus	EP300 interacting inhibitor of differentiation 2B(Eid2b)
CPEB3	ENSMUSG00000039652	Mus musculus	cytoplasmic polyadenylation element binding protein 3(Cpeb3)
CPEB4	ENSMUSG00000020300	Mus musculus	cytoplasmic polyadenylation element binding protein 4(Cpeb4)
TSNAX	ENSMUSG00000056820	Mus musculus	translin-associated factor X(Tsnax)
VPS37A	ENSMUSG00000031600	Mus musculus	vacuolar protein sorting 37A(Vps37a)
VPS37B	ENSMUSG00000066278	Mus musculus	vacuolar protein sorting 37B(Vps37b)
VPS37C	ENSMUSG00000048832	Mus musculus	vacuolar protein sorting 37C(Vps37c)
GNL3L	ENSMUSG00000025266	Mus musculus	guanine nucleotide binding protein-like 3 (nucleolar)-like(Gnl3l)
MITD1	ENSMUSG00000026088	Mus musculus	MIT, microtubule interacting and transport, domain containing 1(Mitd1)
VPS37D	ENSMUSG00000043614	Mus musculus	vacuolar protein sorting 37D(Vps37d)
CPEB1	ENSMUSG00000025586	Mus musculus	cytoplasmic polyadenylation element binding protein 1(Cpeb1)
SLC26A1	ENSMUSG00000046959	Mus musculus	solute carrier family 26 (sulfate transporter), member 1(Slc26a1)
FAM195A	ENSMUSG00000025732	Mus musculus	family with sequence similarity 195, member A(Fam195a)
FAM195B	ENSMUSG00000061111	Mus musculus	family with sequence similarity 195, member B(Fam195b)
SLC26A2	ENSMUSG00000034320	Mus musculus	solute carrier family 26 (sulfate transporter), member 2(Slc26a2)
AP2B1	ENSMUSG00000035152	Mus musculus	adaptor-related protein complex 2, beta 1 subunit(Ap2b1)
FXN	ENSMUSG00000059363	Mus musculus	frataxin(Fxn)
ETAA1	ENSMUSG00000016984	Mus musculus	Ewing tumor-associated antigen 1(Etaa1)
ATP6V0D1	ENSMUSG00000013160	Mus musculus	ATPase, H+ transporting, lysosomal V0 subunit D1(Atp6v0d1)
PIEZO1	ENSMUSG00000014444	Mus musculus	piezo-type mechanosensitive ion channel component 1(Piezo1)
PIEZO2	ENSMUSG00000041482	Mus musculus	piezo-type mechanosensitive ion channel component 2(Piezo2)
GOLM1	ENSMUSG00000021556	Mus musculus	golgi membrane protein 1(Golm1)
GPR173	ENSMUSG00000056679	Mus musculus	G-protein coupled receptor 173(Gpr173)
STX1A	ENSMUSG00000007207	Mus musculus	syntaxin 1A (brain)(Stx1a)
NIP7	ENSMUSG00000031917	Mus musculus	NIP7, nucleolar pre-rRNA processing protein(Nip7)
FAM35A	ENSMUSG00000041471	Mus musculus	family with sequence similarity 35, member A(Fam35a)
LENG9	ENSMUSG00000043432	Mus musculus	leukocyte receptor cluster (LRC) member 9(Leng9)
LENG8	ENSMUSG00000035545	Mus musculus	leukocyte receptor cluster (LRC) member 8(Leng8)
FAM196B	ENSMUSG00000069911	Mus musculus	family with sequence similarity 196, member B(Fam196b)
PGPEP1L	ENSMUSG00000030553	Mus musculus	pyroglutamyl-peptidase I-like(Pgpep1l)
SLC26A6	ENSMUSG00000023259	Mus musculus	solute carrier family 26, member 6(Slc26a6)
IFFO2	ENSMUSG00000094439	Mus musculus	intermediate filament family orphan 2(Iffo2)
IFFO2	ENSMUSG00000041025	Mus musculus	intermediate filament family orphan 2(Iffo2)
IFFO1	ENSMUSG00000038271	Mus musculus	intermediate filament family orphan 1(Iffo1)
BID	ENSMUSG00000004446	Mus musculus	BH3 interacting domain death agonist(Bid)
GPR180	ENSMUSG00000022131	Mus musculus	G protein-coupled receptor 180(Gpr180)
BET1	ENSMUSG00000032757	Mus musculus	Bet1 golgi vesicular membrane trafficking protein(Bet1)
NEO1	ENSMUSG00000032340	Mus musculus	neogenin(Neo1)
SFT2D1	ENSMUSG00000073468	Mus musculus	SFT2 domain containing 1(Sft2d1)
STT3B	ENSMUSG00000032437	Mus musculus	STT3, subunit of the oligosaccharyltransferase complex, homolog B (S. cerevisiae)(Stt3b)
SFT2D2	ENSMUSG00000040848	Mus musculus	SFT2 domain containing 2(Sft2d2)
NCAPH	ENSMUSG00000034906	Mus musculus	non-SMC condensin I complex, subunit H(Ncaph)
STT3A	ENSMUSG00000032116	Mus musculus	STT3, subunit of the oligosaccharyltransferase complex, homolog A (S. cerevisiae)(Stt3a)
GPM6A	ENSMUSG00000031517	Mus musculus	glycoprotein m6a(Gpm6a)
MDC1	ENSMUSG00000061607	Mus musculus	mediator of DNA damage checkpoint 1(Mdc1)
XBP1	ENSMUSG00000020484	Mus musculus	X-box binding protein 1(Xbp1)
NCAPG	ENSMUSG00000015880	Mus musculus	non-SMC condensin I complex, subunit G(Ncapg)
TYW1	ENSMUSG00000056310	Mus musculus	tRNA-yW synthesizing protein 1 homolog (S. cerevisiae)(Tyw1)
THG1L	ENSMUSG00000011254	Mus musculus	tRNA-histidine guanylyltransferase 1-like (S. cerevisiae)(Thg1l)
PRAP1	ENSMUSG00000025467	Mus musculus	proline-rich acidic protein 1(Prap1)
FAM32A	ENSMUSG00000003039	Mus musculus	family with sequence similarity 32, member A(Fam32a)
NENF	ENSMUSG00000037499	Mus musculus	neuron derived neurotrophic factor(Nenf)
PLEC	ENSMUSG00000022565	Mus musculus	plectin(Plec)
NEMF	ENSMUSG00000020982	Mus musculus	nuclear export mediator factor(Nemf)
MSRB1	ENSMUSG00000075705	Mus musculus	methionine sulfoxide reductase B1(Msrb1)
SFT2D3	ENSMUSG00000044982	Mus musculus	SFT2 domain containing 3(Sft2d3)
SNAI1	ENSMUSG00000042821	Mus musculus	snail family zinc finger 1(Snai1)
MSRB2	ENSMUSG00000023094	Mus musculus	methionine sulfoxide reductase B2(Msrb2)
MSRB3	ENSMUSG00000051236	Mus musculus	methionine sulfoxide reductase B3(Msrb3)
SNAI3	ENSMUSG00000006587	Mus musculus	snail family zinc finger 3(Snai3)
AP2A2	ENSMUSG00000002957	Mus musculus	adaptor-related protein complex 2, alpha 2 subunit(Ap2a2)
FBLN1	ENSMUSG00000006369	Mus musculus	fibulin 1(Fbln1)
FCGR2B	ENSMUSG00000026656	Mus musculus	Fc receptor, IgG, low affinity IIb(Fcgr2b)
AP2A1	ENSMUSG00000060279	Mus musculus	adaptor-related protein complex 2, alpha 1 subunit(Ap2a1)
FYN	ENSMUSG00000019843	Mus musculus	Fyn proto-oncogene(Fyn)
GFPT1	ENSMUSG00000029992	Mus musculus	glutamine fructose-6-phosphate transaminase 1(Gfpt1)
GFPT2	ENSMUSG00000020363	Mus musculus	glutamine fructose-6-phosphate transaminase 2(Gfpt2)
RPL7L1	ENSMUSG00000063888	Mus musculus	ribosomal protein L7-like 1(Rpl7l1)
NINL	ENSMUSG00000068115	Mus musculus	ninein-like(Ninl)
FBLN7	ENSMUSG00000027386	Mus musculus	fibulin 7(Fbln7)
ATP6V0A1	ENSMUSG00000019302	Mus musculus	ATPase, H+ transporting, lysosomal V0 subunit A1(Atp6v0a1)
BIK	ENSMUSG00000016758	Mus musculus	BCL2-interacting killer(Bik)
ATP5A1	ENSMUSG00000025428	Mus musculus	ATP synthase, H+ transporting, mitochondrial F1 complex, alpha subunit 1(Atp5a1)
ATP6V0A2	ENSMUSG00000038023	Mus musculus	ATPase, H+ transporting, lysosomal V0 subunit A2(Atp6v0a2)
NIT1	ENSMUSG00000013997	Mus musculus	nitrilase 1(Nit1)
NIT2	ENSMUSG00000022751	Mus musculus	nitrilase family, member 2(Nit2)
FAM199X	ENSMUSG00000042595	Mus musculus	family with sequence similarity 199, X-linked(Fam199x)
SLX4IP	ENSMUSG00000027281	Mus musculus	SLX4 interacting protein(Slx4ip)
DMXL1	ENSMUSG00000037416	Mus musculus	Dmx-like 1(Dmxl1)
DMXL2	ENSMUSG00000041268	Mus musculus	Dmx-like 2(Dmxl2)
TTC21A	ENSMUSG00000032514	Mus musculus	tetratricopeptide repeat domain 21A(Ttc21a)
RRP1	ENSMUSG00000061032	Mus musculus	ribosomal RNA processing 1 homolog (S. cerevisiae)(Rrp1)
DRAXIN	ENSMUSG00000029005	Mus musculus	dorsal inhibitory axon guidance protein(Draxin)
RRP8	ENSMUSG00000030888	Mus musculus	ribosomal RNA processing 8, methyltransferase, homolog (yeast)(Rrp8)
RRP9	ENSMUSG00000041506	Mus musculus	RRP9, small subunit (SSU) processome component, homolog (yeast)(Rrp9)
CHPT1	ENSMUSG00000060002	Mus musculus	choline phosphotransferase 1(Chpt1)
NEBL	ENSMUSG00000053702	Mus musculus	nebulette(Nebl)
ERC2	ENSMUSG00000040640	Mus musculus	ELKS/RAB6-interacting/CAST family member 2(Erc2)
ERC1	ENSMUSG00000030172	Mus musculus	ELKS/RAB6-interacting/CAST family member 1(Erc1)
EMP3	ENSMUSG00000040212	Mus musculus	epithelial membrane protein 3(Emp3)
LBX2	ENSMUSG00000034968	Mus musculus	ladybird homeobox homolog 2 (Drosophila)(Lbx2)
EMP2	ENSMUSG00000022505	Mus musculus	epithelial membrane protein 2(Emp2)
EMP1	ENSMUSG00000030208	Mus musculus	epithelial membrane protein 1(Emp1)
TWSG1	ENSMUSG00000024098	Mus musculus	twisted gastrulation BMP signaling modulator 1(Twsg1)
BLM	ENSMUSG00000030528	Mus musculus	Bloom syndrome, RecQ helicase-like(Blm)
BLK	ENSMUSG00000014453	Mus musculus	B lymphoid kinase(Blk)
NEDD9	ENSMUSG00000021365	Mus musculus	neural precursor cell expressed, developmentally down-regulated gene 9(Nedd9)
NEDD8	ENSMUSG00000010376	Mus musculus	neural precursor cell expressed, developmentally down-regulated gene 8(Nedd8)
KARS	ENSMUSG00000031948	Mus musculus	lysyl-tRNA synthetase(Kars)
MDP1	ENSMUSG00000002329	Mus musculus	magnesium-dependent phosphatase 1(Mdp1)
UBE2D3	ENSMUSG00000078578	Mus musculus	ubiquitin-conjugating enzyme E2D 3(Ube2d3)
RNFT2	ENSMUSG00000032850	Mus musculus	ring finger protein, transmembrane 2(Rnft2)
RNFT1	ENSMUSG00000020521	Mus musculus	ring finger protein, transmembrane 1(Rnft1)
UBE2D1	ENSMUSG00000019927	Mus musculus	ubiquitin-conjugating enzyme E2D 1(Ube2d1)
BMF	ENSMUSG00000040093	Mus musculus	BCL2 modifying factor(Bmf)
FN1	ENSMUSG00000026193	Mus musculus	fibronectin 1(Fn1)
KAT8	ENSMUSG00000030801	Mus musculus	K(lysine) acetyltransferase 8(Kat8)
KAT7	ENSMUSG00000038909	Mus musculus	K(lysine) acetyltransferase 7(Kat7)
YIPF6	ENSMUSG00000047694	Mus musculus	Yip1 domain family, member 6(Yipf6)
TTC21B	ENSMUSG00000034848	Mus musculus	tetratricopeptide repeat domain 21B(Ttc21b)
NTPCR	ENSMUSG00000031851	Mus musculus	nucleoside-triphosphatase, cancer-related(Ntpcr)
UBOX5	ENSMUSG00000027300	Mus musculus	U box domain containing 5(Ubox5)
INAFM1	ENSMUSG00000091811	Mus musculus	InaF motif containing 1(Inafm1)
KAT5	ENSMUSG00000024926	Mus musculus	K(lysine) acetyltransferase 5(Kat5)
PPIF	ENSMUSG00000021868	Mus musculus	peptidylprolyl isomerase F (cyclophilin F)(Ppif)
UBE2E3	ENSMUSG00000027011	Mus musculus	ubiquitin-conjugating enzyme E2E 3(Ube2e3)
PPIE	ENSMUSG00000028651	Mus musculus	peptidylprolyl isomerase E (cyclophilin E)(Ppie)
NEDD1	ENSMUSG00000019988	Mus musculus	neural precursor cell expressed, developmentally down-regulated gene 1(Nedd1)
PPIH	ENSMUSG00000060288	Mus musculus	peptidyl prolyl isomerase H(Ppih)
PPIG	ENSMUSG00000042133	Mus musculus	peptidyl-prolyl isomerase G (cyclophilin G)(Ppig)
PPIB	ENSMUSG00000032383	Mus musculus	peptidylprolyl isomerase B(Ppib)
NEDD4	ENSMUSG00000032216	Mus musculus	neural precursor cell expressed, developmentally down-regulated 4(Nedd4)
PPIA	ENSMUSG00000071866	Mus musculus	peptidylprolyl isomerase A(Ppia)
PPID	ENSMUSG00000027804	Mus musculus	peptidylprolyl isomerase D (cyclophilin D)(Ppid)
PPIC	ENSMUSG00000024538	Mus musculus	peptidylprolyl isomerase C(Ppic)
ALDH2	ENSMUSG00000029455	Mus musculus	aldehyde dehydrogenase 2, mitochondrial(Aldh2)
YIPF3	ENSMUSG00000071074	Mus musculus	Yip1 domain family, member 3(Yipf3)
SPCS3	ENSMUSG00000054408	Mus musculus	signal peptidase complex subunit 3 homolog (S. cerevisiae)(Spcs3)
YIPF2	ENSMUSG00000032182	Mus musculus	Yip1 domain family, member 2(Yipf2)
CIRBP	ENSMUSG00000045193	Mus musculus	cold inducible RNA binding protein(Cirbp)
RRS1	ENSMUSG00000061024	Mus musculus	ribosome biogenesis regulator 1(Rrs1)
SPCS1	ENSMUSG00000021917	Mus musculus	signal peptidase complex subunit 1 homolog (S. cerevisiae)(Spcs1)
YIPF5	ENSMUSG00000024487	Mus musculus	Yip1 domain family, member 5(Yipf5)
YIPF4	ENSMUSG00000024072	Mus musculus	Yip1 domain family, member 4(Yipf4)
SPCS2	ENSMUSG00000035227	Mus musculus	signal peptidase complex subunit 2 homolog (S. cerevisiae)(Spcs2)
CCNDBP1	ENSMUSG00000023572	Mus musculus	cyclin D-type binding-protein 1(Ccndbp1)
YIPF1	ENSMUSG00000057375	Mus musculus	Yip1 domain family, member 1(Yipf1)
UBE2E1	ENSMUSG00000021774	Mus musculus	ubiquitin-conjugating enzyme E2E 1(Ube2e1)
PPOX	ENSMUSG00000062729	Mus musculus	protoporphyrinogen oxidase(Ppox)
FUBP1	ENSMUSG00000028034	Mus musculus	far upstream element (FUSE) binding protein 1(Fubp1)
FOS	ENSMUSG00000021250	Mus musculus	FBJ osteosarcoma oncogene(Fos)
FUBP3	ENSMUSG00000026843	Mus musculus	far upstream element (FUSE) binding protein 3(Fubp3)
DGCR2	ENSMUSG00000092470	Mus musculus	DiGeorge syndrome critical region gene 2(Dgcr2)
DGCR2	ENSMUSG00000003166	Mus musculus	DiGeorge syndrome critical region gene 2(Dgcr2)
DGCR8	ENSMUSG00000022718	Mus musculus	DiGeorge syndrome critical region gene 8(Dgcr8)
DGCR6	ENSMUSG00000003531	Mus musculus	DiGeorge syndrome critical region gene 6(Dgcr6)
NIPAL3	ENSMUSG00000028803	Mus musculus	NIPA-like domain containing 3(Nipal3)
NIPAL2	ENSMUSG00000038879	Mus musculus	NIPA-like domain containing 2(Nipal2)
MDN1	ENSMUSG00000058006	Mus musculus	midasin AAA ATPase 1(Mdn1)
BOC	ENSMUSG00000022687	Mus musculus	biregional cell adhesion molecule-related/down-regulated by oncogenes (Cdon) binding protein(Boc)
MAPKBP1	ENSMUSG00000033902	Mus musculus	mitogen-activated protein kinase binding protein 1(Mapkbp1)
NIPAL4	ENSMUSG00000020411	Mus musculus	NIPA-like domain containing 4(Nipal4)
TTC23L	ENSMUSG00000022249	Mus musculus	tetratricopeptide repeat domain 23-like(Ttc23l)
NRIP3	ENSMUSG00000034825	Mus musculus	nuclear receptor interacting protein 3(Nrip3)
ZC3H10	ENSMUSG00000039810	Mus musculus	zinc finger CCCH type containing 10(Zc3h10)
MRPS5	ENSMUSG00000027374	Mus musculus	mitochondrial ribosomal protein S5(Mrps5)
MRPS6	ENSMUSG00000039680	Mus musculus	mitochondrial ribosomal protein S6(Mrps6)
MRPS7	ENSMUSG00000046756	Mus musculus	mitchondrial ribosomal protein S7(Mrps7)
LMBRD1	ENSMUSG00000073725	Mus musculus	LMBR1 domain containing 1(Lmbrd1)
EML6	ENSMUSG00000044072	Mus musculus	echinoderm microtubule associated protein like 6(Eml6)
LMBRD2	ENSMUSG00000039704	Mus musculus	LMBR1 domain containing 2(Lmbrd2)
MIXL1	ENSMUSG00000026497	Mus musculus	Mix1 homeobox-like 1 (Xenopus laevis)(Mixl1)
MRPS2	ENSMUSG00000035772	Mus musculus	mitochondrial ribosomal protein S2(Mrps2)
NRIP1	ENSMUSG00000048490	Mus musculus	nuclear receptor interacting protein 1(Nrip1)
EML4	ENSMUSG00000032624	Mus musculus	echinoderm microtubule associated protein like 4(Eml4)
PANK4	ENSMUSG00000029056	Mus musculus	pantothenate kinase 4(Pank4)
TYK2	ENSMUSG00000032175	Mus musculus	tyrosine kinase 2(Tyk2)
EML2	ENSMUSG00000040811	Mus musculus	echinoderm microtubule associated protein like 2(Eml2)
EML3	ENSMUSG00000071647	Mus musculus	echinoderm microtubule associated protein like 3(Eml3)
PANK2	ENSMUSG00000037514	Mus musculus	pantothenate kinase 2(Pank2)
PANK3	ENSMUSG00000018846	Mus musculus	pantothenate kinase 3(Pank3)
MANEAL	ENSMUSG00000042763	Mus musculus	mannosidase, endo-alpha-like(Maneal)
MRPS9	ENSMUSG00000060679	Mus musculus	mitochondrial ribosomal protein S9(Mrps9)
PANK1	ENSMUSG00000033610	Mus musculus	pantothenate kinase 1(Pank1)
CFL1	ENSMUSG00000056201	Mus musculus	cofilin 1, non-muscle(Cfl1)
MDM2	ENSMUSG00000020184	Mus musculus	transformed mouse 3T3 cell double minute 2(Mdm2)
DHPS	ENSMUSG00000060038	Mus musculus	deoxyhypusine synthase(Dhps)
PCYOX1	ENSMUSG00000029998	Mus musculus	prenylcysteine oxidase 1(Pcyox1)
MDM4	ENSMUSG00000054387	Mus musculus	transformed mouse 3T3 cell double minute 4(Mdm4)
MDM1	ENSMUSG00000020212	Mus musculus	transformed mouse 3T3 cell double minute 1(Mdm1)
C1D	ENSMUSG00000000581	Mus musculus	C1D nuclear receptor co-repressor(C1d)
CUEDC2	ENSMUSG00000036748	Mus musculus	CUE domain containing 2(Cuedc2)
GPR108	ENSMUSG00000005823	Mus musculus	G protein-coupled receptor 108(Gpr108)
FRK	ENSMUSG00000019779	Mus musculus	fyn-related kinase(Frk)
TRIB3	ENSMUSG00000032715	Mus musculus	tribbles pseudokinase 3(Trib3)
TNFRSF8	ENSMUSG00000028602	Mus musculus	tumor necrosis factor receptor superfamily, member 8(Tnfrsf8)
TNFRSF4	ENSMUSG00000029075	Mus musculus	tumor necrosis factor receptor superfamily, member 4(Tnfrsf4)
TRIB2	ENSMUSG00000020601	Mus musculus	tribbles pseudokinase 2(Trib2)
TRIB1	ENSMUSG00000032501	Mus musculus	tribbles pseudokinase 1(Trib1)
TYMS	ENSMUSG00000025747	Mus musculus	thymidylate synthase(Tyms)
TYMP	ENSMUSG00000022615	Mus musculus	thymidine phosphorylase(Tymp)
NEFH	ENSMUSG00000020396	Mus musculus	neurofilament, heavy polypeptide(Nefh)
IL2RG	ENSMUSG00000031304	Mus musculus	interleukin 2 receptor, gamma chain(Il2rg)
NEFL	ENSMUSG00000022055	Mus musculus	neurofilament, light polypeptide(Nefl)
CRIM1	ENSMUSG00000024074	Mus musculus	cysteine rich transmembrane BMP regulator 1 (chordin like)(Crim1)
PPWD1	ENSMUSG00000021713	Mus musculus	peptidylprolyl isomerase domain and WD repeat containing 1(Ppwd1)
NEFM	ENSMUSG00000022054	Mus musculus	neurofilament, medium polypeptide(Nefm)
GPR107	ENSMUSG00000000194	Mus musculus	G protein-coupled receptor 107(Gpr107)
DLST	ENSMUSG00000004789	Mus musculus	dihydrolipoamide S-succinyltransferase (E2 component of 2-oxo-glutarate complex)(Dlst)
IL2RB	ENSMUSG00000068227	Mus musculus	interleukin 2 receptor, beta chain(Il2rb)
GPR119	ENSMUSG00000051209	Mus musculus	G-protein coupled receptor 119(Gpr119)
IGSF9B	ENSMUSG00000034275	Mus musculus	immunoglobulin superfamily, member 9B(Igsf9b)
CDAN1	ENSMUSG00000027284	Mus musculus	congenital dyserythropoietic anemia, type I (human)(Cdan1)
BRE	ENSMUSG00000052139	Mus musculus	brain and reproductive organ-expressed protein(Bre)
TRPC4AP	ENSMUSG00000038324	Mus musculus	transient receptor potential cation channel, subfamily C, member 4 associated protein(Trpc4ap)
CUEDC1	ENSMUSG00000018378	Mus musculus	CUE domain containing 1(Cuedc1)
RPL18	ENSMUSG00000059070	Mus musculus	ribosomal protein L18(Rpl18)
SLC9A8	ENSMUSG00000039463	Mus musculus	solute carrier family 9 (sodium/hydrogen exchanger), member 8(Slc9a8)
RPL17	ENSMUSG00000062328	Mus musculus	ribosomal protein L17(Rpl17)
OSER1	ENSMUSG00000035399	Mus musculus	oxidative stress responsive serine rich 1(Oser1)
SLC9A7	ENSMUSG00000037341	Mus musculus	solute carrier family 9 (sodium/hydrogen exchanger), member 7(Slc9a7)
SLC9A6	ENSMUSG00000060681	Mus musculus	solute carrier family 9 (sodium/hydrogen exchanger), member 6(Slc9a6)
RPL19	ENSMUSG00000017404	Mus musculus	ribosomal protein L19(Rpl19)
PTGS2	ENSMUSG00000032487	Mus musculus	prostaglandin-endoperoxide synthase 2(Ptgs2)
RPL14	ENSMUSG00000025794	Mus musculus	ribosomal protein L14(Rpl14)
SLC9A5	ENSMUSG00000014786	Mus musculus	solute carrier family 9 (sodium/hydrogen exchanger), member 5(Slc9a5)
RPL13	ENSMUSG00000000740	Mus musculus	ribosomal protein L13(Rpl13)
RPL15	ENSMUSG00000012405	Mus musculus	ribosomal protein L15(Rpl15)
SLC9A2	ENSMUSG00000026062	Mus musculus	solute carrier family 9 (sodium/hydrogen exchanger), member 2(Slc9a2)
STOML1	ENSMUSG00000032333	Mus musculus	stomatin-like 1(Stoml1)
STOML2	ENSMUSG00000028455	Mus musculus	stomatin (Epb7.2)-like 2(Stoml2)
TVP23B	ENSMUSG00000014177	Mus musculus	trans-golgi network vesicle protein 23B(Tvp23b)
SH3BGR	ENSMUSG00000040666	Mus musculus	SH3-binding domain glutamic acid-rich protein(Sh3bgr)
PLS1	ENSMUSG00000049493	Mus musculus	plastin 1 (I-isoform)(Pls1)
SLC9B1	ENSMUSG00000050150	Mus musculus	solute carrier family 9, subfamily B (NHA1, cation proton antiporter 1), member 1(Slc9b1)
SLC9B2	ENSMUSG00000037994	Mus musculus	solute carrier family 9, subfamily B (NHA2, cation proton antiporter 2), member 2(Slc9b2)
RPL10	ENSMUSG00000008682	Mus musculus	ribosomal protein L10(Rpl10)
RPL11	ENSMUSG00000059291	Mus musculus	ribosomal protein L11(Rpl11)
RPL12	ENSMUSG00000038900	Mus musculus	ribosomal protein L12(Rpl12)
PLS3	ENSMUSG00000016382	Mus musculus	plastin 3 (T-isoform)(Pls3)
TIMMDC1	ENSMUSG00000002846	Mus musculus	translocase of inner mitochondrial membrane domain containing 1(Timmdc1)
MDH1B	ENSMUSG00000025963	Mus musculus	malate dehydrogenase 1B, NAD (soluble)(Mdh1b)
ZHX1	ENSMUSG00000022361	Mus musculus	zinc fingers and homeoboxes 1(Zhx1)
MIRLET7E	ENSMUSG00000105758	Mus musculus	microRNA let7e(Mirlet7e)
MIRLET7I	ENSMUSG00000065406	Mus musculus	microRNA let7i(Mirlet7i)
MST1R	ENSMUSG00000032584	Mus musculus	macrophage stimulating 1 receptor (c-met-related tyrosine kinase)(Mst1r)
ATP5SL	ENSMUSG00000057229	Mus musculus	ATP5S-like(Atp5sl)
ACP6	ENSMUSG00000028093	Mus musculus	acid phosphatase 6, lysophosphatidic(Acp6)
ACP5	ENSMUSG00000001348	Mus musculus	acid phosphatase 5, tartrate resistant(Acp5)
MYEF2	ENSMUSG00000027201	Mus musculus	myelin basic protein expression factor 2, repressor(Myef2)
HFE	ENSMUSG00000006611	Mus musculus	hemochromatosis(Hfe)
PPT1	ENSMUSG00000028657	Mus musculus	palmitoyl-protein thioesterase 1(Ppt1)
ACP2	ENSMUSG00000002103	Mus musculus	acid phosphatase 2, lysosomal(Acp2)
PRRC2C	ENSMUSG00000040225	Mus musculus	proline-rich coiled-coil 2C(Prrc2c)
ACP1	ENSMUSG00000044573	Mus musculus	acid phosphatase 1, soluble(Acp1)
HSPA1L	ENSMUSG00000007033	Mus musculus	heat shock protein 1-like(Hspa1l)
NPHP3	ENSMUSG00000032558	Mus musculus	nephronophthisis 3 (adolescent)(Nphp3)
CDC42EP2	ENSMUSG00000045664	Mus musculus	CDC42 effector protein (Rho GTPase binding) 2(Cdc42ep2)
NPHP4	ENSMUSG00000039577	Mus musculus	nephronophthisis 4 (juvenile) homolog (human)(Nphp4)
CDC42EP1	ENSMUSG00000049521	Mus musculus	CDC42 effector protein (Rho GTPase binding) 1(Cdc42ep1)
IL23A	ENSMUSG00000025383	Mus musculus	interleukin 23, alpha subunit p19(Il23a)
LEO1	ENSMUSG00000042487	Mus musculus	Leo1, Paf1/RNA polymerase II complex component(Leo1)
VEZF1	ENSMUSG00000018377	Mus musculus	vascular endothelial zinc finger 1(Vezf1)
CDC42EP4	ENSMUSG00000041598	Mus musculus	CDC42 effector protein (Rho GTPase binding) 4(Cdc42ep4)
CDC42EP3	ENSMUSG00000036533	Mus musculus	CDC42 effector protein (Rho GTPase binding) 3(Cdc42ep3)
PLTP	ENSMUSG00000017754	Mus musculus	phospholipid transfer protein(Pltp)
NPHP1	ENSMUSG00000027378	Mus musculus	nephronophthisis 1 (juvenile) homolog (human)(Nphp1)
PTGR1	ENSMUSG00000028378	Mus musculus	prostaglandin reductase 1(Ptgr1)
PTGR2	ENSMUSG00000072946	Mus musculus	prostaglandin reductase 2(Ptgr2)
IL23R	ENSMUSG00000049093	Mus musculus	interleukin 23 receptor(Il23r)
SPHK2	ENSMUSG00000057342	Mus musculus	sphingosine kinase 2(Sphk2)
IL1RN	ENSMUSG00000026981	Mus musculus	interleukin 1 receptor antagonist(Il1rn)
ROGDI	ENSMUSG00000022540	Mus musculus	rogdi homolog(Rogdi)
HGD	ENSMUSG00000022821	Mus musculus	homogentisate 1, 2-dioxygenase(Hgd)
SPDL1	ENSMUSG00000069910	Mus musculus	spindle apparatus coiled-coil protein 1(Spdl1)
ACPP	ENSMUSG00000032561	Mus musculus	acid phosphatase, prostate(Acpp)
AVPR1B	ENSMUSG00000026432	Mus musculus	arginine vasopressin receptor 1B(Avpr1b)
HGS	ENSMUSG00000025793	Mus musculus	HGF-regulated tyrosine kinase substrate(Hgs)
NUTF2	ENSMUSG00000008450	Mus musculus	nuclear transport factor 2(Nutf2)
APOL6	ENSMUSG00000033576	Mus musculus	apolipoprotein L 6(Apol6)
SLC9A1	ENSMUSG00000028854	Mus musculus	solute carrier family 9 (sodium/hydrogen exchanger), member 1(Slc9a1)
NKAP	ENSMUSG00000016409	Mus musculus	NFKB activating protein(Nkap)
HLF	ENSMUSG00000003949	Mus musculus	hepatic leukemia factor(Hlf)
LEPROTL1	ENSMUSG00000031513	Mus musculus	leptin receptor overlapping transcript-like 1(Leprotl1)
GPR87	ENSMUSG00000051431	Mus musculus	G protein-coupled receptor 87(Gpr87)
FBXL19	ENSMUSG00000030811	Mus musculus	F-box and leucine-rich repeat protein 19(Fbxl19)
SLC23A1	ENSMUSG00000024354	Mus musculus	solute carrier family 23 (nucleobase transporters), member 1(Slc23a1)
RRN3	ENSMUSG00000022682	Mus musculus	RRN3 RNA polymerase I transcription factor homolog (yeast)(Rrn3)
HLX	ENSMUSG00000039377	Mus musculus	H2.0-like homeobox(Hlx)
FBXL12	ENSMUSG00000066892	Mus musculus	F-box and leucine-rich repeat protein 12(Fbxl12)
STRA6	ENSMUSG00000032327	Mus musculus	stimulated by retinoic acid gene 6(Stra6)
FBXL13	ENSMUSG00000048520	Mus musculus	F-box and leucine-rich repeat protein 13(Fbxl13)
FBXL14	ENSMUSG00000030019	Mus musculus	F-box and leucine-rich repeat protein 14(Fbxl14)
FBXL15	ENSMUSG00000025226	Mus musculus	F-box and leucine-rich repeat protein 15(Fbxl15)
CEP170B	ENSMUSG00000072825	Mus musculus	centrosomal protein 170B(Cep170b)
FBXL17	ENSMUSG00000023965	Mus musculus	F-box and leucine-rich repeat protein 17(Fbxl17)
LAG3	ENSMUSG00000030124	Mus musculus	lymphocyte-activation gene 3(Lag3)
FBXL18	ENSMUSG00000066640	Mus musculus	F-box and leucine-rich repeat protein 18(Fbxl18)
MINPP1	ENSMUSG00000024896	Mus musculus	multiple inositol polyphosphate histidine phosphatase 1(Minpp1)
ACO2	ENSMUSG00000022477	Mus musculus	aconitase 2, mitochondrial(Aco2)
ACO1	ENSMUSG00000028405	Mus musculus	aconitase 1(Aco1)
MROH6	ENSMUSG00000098678	Mus musculus	maestro heat-like repeat family member 6(Mroh6)
FBXL20	ENSMUSG00000020883	Mus musculus	F-box and leucine-rich repeat protein 20(Fbxl20)
GMEB2	ENSMUSG00000038705	Mus musculus	glucocorticoid modulatory element binding protein 2(Gmeb2)
MROH8	ENSMUSG00000074627	Mus musculus	maestro heat-like repeat family member 8(Mroh8)
GMEB1	ENSMUSG00000028901	Mus musculus	glucocorticoid modulatory element binding protein 1(Gmeb1)
HN1	ENSMUSG00000020737	Mus musculus	hematological and neurological expressed sequence 1(Hn1)
FOSB	ENSMUSG00000003545	Mus musculus	FBJ osteosarcoma oncogene B(Fosb)
TRMT61A	ENSMUSG00000060950	Mus musculus	tRNA methyltransferase 61A(Trmt61a)
MYADM	ENSMUSG00000068566	Mus musculus	myeloid-associated differentiation marker(Myadm)
TRMT61B	ENSMUSG00000085492	Mus musculus	tRNA methyltransferase 61B(Trmt61b)
MROH1	ENSMUSG00000022558	Mus musculus	maestro heat-like repeat family member 1(Mroh1)
RPL41	ENSMUSG00000093674	Mus musculus	ribosomal protein L41(Rpl41)
RRM2	ENSMUSG00000020649	Mus musculus	ribonucleotide reductase M2(Rrm2)
RRM1	ENSMUSG00000030978	Mus musculus	ribonucleotide reductase M1(Rrm1)
SRGAP3	ENSMUSG00000030257	Mus musculus	SLIT-ROBO Rho GTPase activating protein 3(Srgap3)
RPL3L	ENSMUSG00000002500	Mus musculus	ribosomal protein L3-like(Rpl3l)
USH1C	ENSMUSG00000030838	Mus musculus	Usher syndrome 1C(Ush1c)
G0S2	ENSMUSG00000009633	Mus musculus	G0/G1 switch gene 2(G0s2)
SRGAP1	ENSMUSG00000020121	Mus musculus	SLIT-ROBO Rho GTPase activating protein 1(Srgap1)
CER1	ENSMUSG00000038192	Mus musculus	cerberus 1, DAN family BMP antagonist(Cer1)
APOOL	ENSMUSG00000025525	Mus musculus	apolipoprotein O-like(Apool)
NKD1	ENSMUSG00000031661	Mus musculus	naked cuticle 1 homolog (Drosophila)(Nkd1)
GPR61	ENSMUSG00000046793	Mus musculus	G protein-coupled receptor 61(Gpr61)
GPR63	ENSMUSG00000040372	Mus musculus	G protein-coupled receptor 63(Gpr63)
GPR65	ENSMUSG00000021886	Mus musculus	G-protein coupled receptor 65(Gpr65)
RPL35	ENSMUSG00000062997	Mus musculus	ribosomal protein L35(Rpl35)
HK2	ENSMUSG00000000628	Mus musculus	hexokinase 2(Hk2)
RPL36	ENSMUSG00000057863	Mus musculus	ribosomal protein L36(Rpl36)
GNG11	ENSMUSG00000032766	Mus musculus	guanine nucleotide binding protein (G protein), gamma 11(Gng11)
RPL37	ENSMUSG00000041841	Mus musculus	ribosomal protein L37(Rpl37)
RPL38	ENSMUSG00000057322	Mus musculus	ribosomal protein L38(Rpl38)
GNG12	ENSMUSG00000036402	Mus musculus	guanine nucleotide binding protein (G protein), gamma 12(Gng12)
RPL39	ENSMUSG00000079641	Mus musculus	ribosomal protein L39(Rpl39)
ITM2C	ENSMUSG00000026223	Mus musculus	integral membrane protein 2C(Itm2c)
NPDC1	ENSMUSG00000015094	Mus musculus	neural proliferation, differentiation and control 1(Npdc1)
RPL30	ENSMUSG00000058600	Mus musculus	ribosomal protein L30(Rpl30)
CRISPLD1	ENSMUSG00000025776	Mus musculus	cysteine-rich secretory protein LCCL domain containing 1(Crispld1)
DAPP1	ENSMUSG00000028159	Mus musculus	dual adaptor for phosphotyrosine and 3-phosphoinositides 1(Dapp1)
RPL32	ENSMUSG00000057841	Mus musculus	ribosomal protein L32(Rpl32)
CRISPLD2	ENSMUSG00000031825	Mus musculus	cysteine-rich secretory protein LCCL domain containing 2(Crispld2)
RPL31	ENSMUSG00000073702	Mus musculus	ribosomal protein L31(Rpl31)
RPL34	ENSMUSG00000062006	Mus musculus	ribosomal protein L34(Rpl34)
EOGT	ENSMUSG00000035245	Mus musculus	EGF domain-specific O-linked N-acetylglucosamine (GlcNAc) transferase(Eogt)
RAB11B	ENSMUSG00000077450	Mus musculus	RAB11B, member RAS oncogene family(Rab11b)
RAB11A	ENSMUSG00000004771	Mus musculus	RAB11A, member RAS oncogene family(Rab11a)
ILVBL	ENSMUSG00000032763	Mus musculus	ilvB (bacterial acetolactate synthase)-like(Ilvbl)
CERK	ENSMUSG00000035891	Mus musculus	ceramide kinase(Cerk)
DNM3	ENSMUSG00000040265	Mus musculus	dynamin 3(Dnm3)
SHMT1	ENSMUSG00000020534	Mus musculus	serine hydroxymethyltransferase 1 (soluble)(Shmt1)
TMPRSS9	ENSMUSG00000059406	Mus musculus	transmembrane protease, serine 9(Tmprss9)
FTCD	ENSMUSG00000001155	Mus musculus	formiminotransferase cyclodeaminase(Ftcd)
EXPH5	ENSMUSG00000034584	Mus musculus	exophilin 5(Exph5)
RPL26	ENSMUSG00000060938	Mus musculus	ribosomal protein L26(Rpl26)
DNLZ	ENSMUSG00000075467	Mus musculus	DNL-type zinc finger(Dnlz)
RPL27	ENSMUSG00000063316	Mus musculus	ribosomal protein L27(Rpl27)
ACLY	ENSMUSG00000020917	Mus musculus	ATP citrate lyase(Acly)
RPL24	ENSMUSG00000098274	Mus musculus	ribosomal protein L24(Rpl24)
RPL28	ENSMUSG00000030432	Mus musculus	ribosomal protein L28(Rpl28)
TMPRSS4	ENSMUSG00000032091	Mus musculus	transmembrane protease, serine 4(Tmprss4)
RPL29	ENSMUSG00000048758	Mus musculus	ribosomal protein L29(Rpl29)
RPS6KA5	ENSMUSG00000021180	Mus musculus	ribosomal protein S6 kinase, polypeptide 5(Rps6ka5)
RPS6KA3	ENSMUSG00000031309	Mus musculus	ribosomal protein S6 kinase polypeptide 3(Rps6ka3)
RPS6KA1	ENSMUSG00000003644	Mus musculus	ribosomal protein S6 kinase polypeptide 1(Rps6ka1)
RPL23	ENSMUSG00000071415	Mus musculus	ribosomal protein L23(Rpl23)
RPL22	ENSMUSG00000028936	Mus musculus	ribosomal protein L22(Rpl22)
RPL21	ENSMUSG00000041453	Mus musculus	ribosomal protein L21(Rpl21)
MCFD2	ENSMUSG00000024150	Mus musculus	multiple coagulation factor deficiency 2(Mcfd2)
BNIP3L	ENSMUSG00000022051	Mus musculus	BCL2/adenovirus E1B interacting protein 3-like(Bnip3l)
UBLCP1	ENSMUSG00000041231	Mus musculus	ubiquitin-like domain containing CTD phosphatase 1(Ublcp1)
DNM1	ENSMUSG00000026825	Mus musculus	dynamin 1(Dnm1)
DNM2	ENSMUSG00000033335	Mus musculus	dynamin 2(Dnm2)
METTL21B	ENSMUSG00000080115	Mus musculus	methyltransferase like 21B(Mettl21b)
METTL21A	ENSMUSG00000025956	Mus musculus	methyltransferase like 21A(Mettl21a)
CAPZA2	ENSMUSG00000015733	Mus musculus	capping protein (actin filament) muscle Z-line, alpha 2(Capza2)
CAPZA1	ENSMUSG00000070372	Mus musculus	capping protein (actin filament) muscle Z-line, alpha 1(Capza1)
RRAD	ENSMUSG00000031880	Mus musculus	Ras-related associated with diabetes(Rrad)
RPS6KB2	ENSMUSG00000024830	Mus musculus	ribosomal protein S6 kinase, polypeptide 2(Rps6kb2)
RPS6KB1	ENSMUSG00000020516	Mus musculus	ribosomal protein S6 kinase, polypeptide 1(Rps6kb1)
ZIC1	ENSMUSG00000032368	Mus musculus	zinc finger protein of the cerebellum 1(Zic1)
IGHMBP2	ENSMUSG00000024831	Mus musculus	immunoglobulin mu binding protein 2(Ighmbp2)
APOA2	ENSMUSG00000005681	Mus musculus	apolipoprotein A-II(Apoa2)
FAM49A	ENSMUSG00000020589	Mus musculus	family with sequence similarity 49, member A(Fam49a)
APOA1	ENSMUSG00000032083	Mus musculus	apolipoprotein A-I(Apoa1)
FAM49B	ENSMUSG00000022378	Mus musculus	family with sequence similarity 49, member B(Fam49b)
SH2D5	ENSMUSG00000045349	Mus musculus	SH2 domain containing 5(Sh2d5)
APOA5	ENSMUSG00000032079	Mus musculus	apolipoprotein A-V(Apoa5)
RRAS	ENSMUSG00000038387	Mus musculus	related RAS viral (r-ras) oncogene(Rras)
DAP	ENSMUSG00000039168	Mus musculus	death-associated protein(Dap)
HAL	ENSMUSG00000020017	Mus musculus	histidine ammonia lyase(Hal)
RPS6KC1	ENSMUSG00000089872	Mus musculus	ribosomal protein S6 kinase polypeptide 1(Rps6kc1)
VAX2	ENSMUSG00000034777	Mus musculus	ventral anterior homeobox 2(Vax2)
VAX1	ENSMUSG00000006270	Mus musculus	ventral anterior homeobox 1(Vax1)
SLC34A3	ENSMUSG00000006469	Mus musculus	solute carrier family 34 (sodium phosphate), member 3(Slc34a3)
NFU1	ENSMUSG00000029993	Mus musculus	NFU1 iron-sulfur cluster scaffold(Nfu1)
HYKK	ENSMUSG00000035878	Mus musculus	hydroxylysine kinase 1(Hykk)
GPR55	ENSMUSG00000049608	Mus musculus	G protein-coupled receptor 55(Gpr55)
SPDEF	ENSMUSG00000024215	Mus musculus	SAM pointed domain containing ets transcription factor(Spdef)
CAMTA1	ENSMUSG00000014592	Mus musculus	calmodulin binding transcription activator 1(Camta1)
ACHE	ENSMUSG00000023328	Mus musculus	acetylcholinesterase(Ache)
CAMTA2	ENSMUSG00000040712	Mus musculus	calmodulin binding transcription activator 2(Camta2)
BPIFB2	ENSMUSG00000027481	Mus musculus	BPI fold containing family B, member 2(Bpifb2)
KBTBD13	ENSMUSG00000054978	Mus musculus	kelch repeat and BTB (POZ) domain containing 13(Kbtbd13)
PANX1	ENSMUSG00000031934	Mus musculus	pannexin 1(Panx1)
TNFRSF12A	ENSMUSG00000023905	Mus musculus	tumor necrosis factor receptor superfamily, member 12a(Tnfrsf12a)
SIPA1	ENSMUSG00000056917	Mus musculus	signal-induced proliferation associated gene 1(Sipa1)
APOC1	ENSMUSG00000040564	Mus musculus	apolipoprotein C-I(Apoc1)
APOC2	ENSMUSG00000002992	Mus musculus	apolipoprotein C-II(Apoc2)
CX3CL1	ENSMUSG00000031778	Mus musculus	chemokine (C-X3-C motif) ligand 1(Cx3cl1)
ANKS4B	ENSMUSG00000030909	Mus musculus	ankyrin repeat and sterile alpha motif domain containing 4B(Anks4b)
NKAIN3	ENSMUSG00000055761	Mus musculus	Na+/K+ transporting ATPase interacting 3(Nkain3)
EXTL1	ENSMUSG00000028838	Mus musculus	exostoses (multiple)-like 1(Extl1)
EXTL2	ENSMUSG00000027963	Mus musculus	exostoses (multiple)-like 2(Extl2)
APOC4	ENSMUSG00000074336	Mus musculus	apolipoprotein C-IV(Apoc4)
APOC3	ENSMUSG00000032081	Mus musculus	apolipoprotein C-III(Apoc3)
APOBR	ENSMUSG00000042759	Mus musculus	apolipoprotein B receptor(Apobr)
RPL7A	ENSMUSG00000062647	Mus musculus	ribosomal protein L7A(Rpl7a)
ATP5J2	ENSMUSG00000038690	Mus musculus	ATP synthase, H+ transporting, mitochondrial F0 complex, subunit F2(Atp5j2)
TNFRSF13B	ENSMUSG00000010142	Mus musculus	tumor necrosis factor receptor superfamily, member 13b(Tnfrsf13b)
GOLIM4	ENSMUSG00000034109	Mus musculus	golgi integral membrane protein 4(Golim4)
TNFRSF13C	ENSMUSG00000068105	Mus musculus	tumor necrosis factor receptor superfamily, member 13c(Tnfrsf13c)
IREB2	ENSMUSG00000032293	Mus musculus	iron responsive element binding protein 2(Ireb2)
RPL23A	ENSMUSG00000058546	Mus musculus	ribosomal protein L23A(Rpl23a)
SHANK1	ENSMUSG00000038738	Mus musculus	SH3/ankyrin domain gene 1(Shank1)
VAV2	ENSMUSG00000009621	Mus musculus	vav 2 oncogene(Vav2)
VAV1	ENSMUSG00000034116	Mus musculus	vav 1 oncogene(Vav1)
DNA2	ENSMUSG00000036875	Mus musculus	DNA replication helicase/nuclease 2(Dna2)
PLK4	ENSMUSG00000025758	Mus musculus	polo-like kinase 4(Plk4)
PLK3	ENSMUSG00000028680	Mus musculus	polo-like kinase 3(Plk3)
GPR37	ENSMUSG00000039904	Mus musculus	G protein-coupled receptor 37(Gpr37)
PLK2	ENSMUSG00000021701	Mus musculus	polo-like kinase 2(Plk2)
PLK1	ENSMUSG00000030867	Mus musculus	polo-like kinase 1(Plk1)
ZIC4	ENSMUSG00000036972	Mus musculus	zinc finger protein of the cerebellum 4(Zic4)
CDKN2AIP	ENSMUSG00000038069	Mus musculus	CDKN2A interacting protein(Cdkn2aip)
GPR39	ENSMUSG00000026343	Mus musculus	G protein-coupled receptor 39(Gpr39)
ZIC5	ENSMUSG00000041703	Mus musculus	zinc finger protein of the cerebellum 5(Zic5)
RHBDL1	ENSMUSG00000025735	Mus musculus	rhomboid, veinlet-like 1 (Drosophila)(Rhbdl1)
ADAM22	ENSMUSG00000040537	Mus musculus	a disintegrin and metallopeptidase domain 22(Adam22)
NKG7	ENSMUSG00000004612	Mus musculus	natural killer cell group 7 sequence(Nkg7)
PABPC1L	ENSMUSG00000054582	Mus musculus	poly(A) binding protein, cytoplasmic 1-like(Pabpc1l)
LEPR	ENSMUSG00000057722	Mus musculus	leptin receptor(Lepr)
DEK	ENSMUSG00000021377	Mus musculus	DEK oncogene (DNA binding)(Dek)
MAGOHB	ENSMUSG00000030188	Mus musculus	mago homolog B, exon junction complex core component(Magohb)
NFX1	ENSMUSG00000028423	Mus musculus	nuclear transcription factor, X-box binding 1(Nfx1)
VASN	ENSMUSG00000039646	Mus musculus	vasorin(Vasn)
DDC	ENSMUSG00000020182	Mus musculus	dopa decarboxylase(Ddc)
GPR19	ENSMUSG00000032641	Mus musculus	G protein-coupled receptor 19(Gpr19)
NUP88	ENSMUSG00000040667	Mus musculus	nucleoporin 88(Nup88)
GPR18	ENSMUSG00000050350	Mus musculus	G protein-coupled receptor 18(Gpr18)
NUP85	ENSMUSG00000020739	Mus musculus	nucleoporin 85(Nup85)
VAT1	ENSMUSG00000034993	Mus musculus	vesicle amine transport 1(Vat1)
VASP	ENSMUSG00000030403	Mus musculus	vasodilator-stimulated phosphoprotein(Vasp)
LIMCH1	ENSMUSG00000037736	Mus musculus	LIM and calponin homology domains 1(Limch1)
ZFAND2A	ENSMUSG00000053581	Mus musculus	zinc finger, AN1-type domain 2A(Zfand2a)
ZFAND2B	ENSMUSG00000026197	Mus musculus	zinc finger, AN1 type domain 2B(Zfand2b)
GPR15	ENSMUSG00000047293	Mus musculus	G protein-coupled receptor 15(Gpr15)
PLLP	ENSMUSG00000031775	Mus musculus	plasma membrane proteolipid(Pllp)
HYPK	ENSMUSG00000027245	Mus musculus	huntingtin interacting protein K(Hypk)
NUP98	ENSMUSG00000063550	Mus musculus	nucleoporin 98(Nup98)
ACCS	ENSMUSG00000040272	Mus musculus	1-aminocyclopropane-1-carboxylate synthase (non-functional)(Accs)
DCK	ENSMUSG00000029366	Mus musculus	deoxycytidine kinase(Dck)
CALCOCO2	ENSMUSG00000006056	Mus musculus	calcium binding and coiled-coil domain 2(Calcoco2)
NUP93	ENSMUSG00000032939	Mus musculus	nucleoporin 93(Nup93)
NFYC	ENSMUSG00000032897	Mus musculus	nuclear transcription factor-Y gamma(Nfyc)
ATP5G2	ENSMUSG00000062683	Mus musculus	ATP synthase, H+ transporting, mitochondrial F0 complex, subunit C2 (subunit 9)(Atp5g2)
NFYB	ENSMUSG00000020248	Mus musculus	nuclear transcription factor-Y beta(Nfyb)
ATP5G1	ENSMUSG00000006057	Mus musculus	ATP synthase, H+ transporting, mitochondrial F0 complex, subunit C1 (subunit 9)(Atp5g1)
NFYA	ENSMUSG00000023994	Mus musculus	nuclear transcription factor-Y alpha(Nfya)
GCN1L1	ENSMUSG00000041638	Mus musculus	GCN1 general control of amino-acid synthesis 1-like 1 (yeast)(Gcn1l1)
ATP5G3	ENSMUSG00000018770	Mus musculus	ATP synthase, H+ transporting, mitochondrial F0 complex, subunit C3 (subunit 9)(Atp5g3)
CALCOCO1	ENSMUSG00000023055	Mus musculus	calcium binding and coiled coil domain 1(Calcoco1)
SAPCD2	ENSMUSG00000026955	Mus musculus	suppressor APC domain containing 2(Sapcd2)
SH2B3	ENSMUSG00000042594	Mus musculus	SH2B adaptor protein 3(Sh2b3)
SH2B2	ENSMUSG00000005057	Mus musculus	SH2B adaptor protein 2(Sh2b2)
SH2B1	ENSMUSG00000030733	Mus musculus	SH2B adaptor protein 1(Sh2b1)
MGME1	ENSMUSG00000027424	Mus musculus	mitochondrial genome maintainance exonuclease 1(Mgme1)
GCHFR	ENSMUSG00000046814	Mus musculus	GTP cyclohydrolase I feedback regulator(Gchfr)
RNF144A	ENSMUSG00000020642	Mus musculus	ring finger protein 144A(Rnf144a)
PLP2	ENSMUSG00000031146	Mus musculus	proteolipid protein 2(Plp2)
CCP110	ENSMUSG00000033904	Mus musculus	centriolar coiled coil protein 110(Ccp110)
SLC12A2	ENSMUSG00000024597	Mus musculus	solute carrier family 12, member 2(Slc12a2)
ATRAID	ENSMUSG00000013622	Mus musculus	all-trans retinoic acid induced differentiation factor(Atraid)
COL13A1	ENSMUSG00000058806	Mus musculus	collagen, type XIII, alpha 1(Col13a1)
SLC12A4	ENSMUSG00000017765	Mus musculus	solute carrier family 12, member 4(Slc12a4)
HCK	ENSMUSG00000003283	Mus musculus	hemopoietic cell kinase(Hck)
SLC12A5	ENSMUSG00000017740	Mus musculus	solute carrier family 12, member 5(Slc12a5)
BZRAP1	ENSMUSG00000034156	Mus musculus	benzodiazepine receptor associated protein 1(Bzrap1)
ATP5F1	ENSMUSG00000000563	Mus musculus	ATP synthase, H+ transporting, mitochondrial F0 complex, subunit B1(Atp5f1)
FUCA2	ENSMUSG00000019810	Mus musculus	fucosidase, alpha-L- 2, plasma(Fuca2)
DBI	ENSMUSG00000026385	Mus musculus	diazepam binding inhibitor(Dbi)
FUCA1	ENSMUSG00000028673	Mus musculus	fucosidase, alpha-L- 1, tissue(Fuca1)
RDH12	ENSMUSG00000021123	Mus musculus	retinol dehydrogenase 12(Rdh12)
DBT	ENSMUSG00000000340	Mus musculus	dihydrolipoamide branched chain transacylase E2(Dbt)
RDH11	ENSMUSG00000066441	Mus musculus	retinol dehydrogenase 11(Rdh11)
RDH10	ENSMUSG00000025921	Mus musculus	retinol dehydrogenase 10 (all-trans)(Rdh10)
DBP	ENSMUSG00000059824	Mus musculus	D site albumin promoter binding protein(Dbp)
ACE2	ENSMUSG00000015405	Mus musculus	angiotensin I converting enzyme (peptidyl-dipeptidase A) 2(Ace2)
SH3BGRL3	ENSMUSG00000028843	Mus musculus	SH3 domain binding glutamic acid-rich protein-like 3(Sh3bgrl3)
SCAND1	ENSMUSG00000046229	Mus musculus	SCAN domain-containing 1(Scand1)
MBTPS1	ENSMUSG00000031835	Mus musculus	membrane-bound transcription factor peptidase, site 1(Mbtps1)
RDH14	ENSMUSG00000020621	Mus musculus	retinol dehydrogenase 14 (all-trans and 9-cis)(Rdh14)
RDH13	ENSMUSG00000008435	Mus musculus	retinol dehydrogenase 13 (all-trans and 9-cis)(Rdh13)
CHMP3	ENSMUSG00000053119	Mus musculus	charged multivesicular body protein 3(Chmp3)
VAPA	ENSMUSG00000024091	Mus musculus	vesicle-associated membrane protein, associated protein A(Vapa)
PDLIM7	ENSMUSG00000021493	Mus musculus	PDZ and LIM domain 7(Pdlim7)
CHMP5	ENSMUSG00000028419	Mus musculus	charged multivesicular body protein 5(Chmp5)
VAPB	ENSMUSG00000054455	Mus musculus	vesicle-associated membrane protein, associated protein B and C(Vapb)
PDLIM5	ENSMUSG00000028273	Mus musculus	PDZ and LIM domain 5(Pdlim5)
CHMP6	ENSMUSG00000025371	Mus musculus	charged multivesicular body protein 6(Chmp6)
CHMP7	ENSMUSG00000034190	Mus musculus	charged multivesicular body protein 7(Chmp7)
LEMD2	ENSMUSG00000044857	Mus musculus	LEM domain containing 2(Lemd2)
LEMD3	ENSMUSG00000048661	Mus musculus	LEM domain containing 3(Lemd3)
PDLIM2	ENSMUSG00000022090	Mus musculus	PDZ and LIM domain 2(Pdlim2)
PDLIM1	ENSMUSG00000055044	Mus musculus	PDZ and LIM domain 1 (elfin)(Pdlim1)
CFP	ENSMUSG00000001128	Mus musculus	complement factor properdin(Cfp)
BDNF	ENSMUSG00000048482	Mus musculus	brain derived neurotrophic factor(Bdnf)
CFI	ENSMUSG00000058952	Mus musculus	complement component factor i(Cfi)
CFD	ENSMUSG00000061780	Mus musculus	complement factor D (adipsin)(Cfd)
SLC12A6	ENSMUSG00000096764	Mus musculus	solute carrier family 12, member 6(Slc12a6)
SLC12A6	ENSMUSG00000027130	Mus musculus	solute carrier family 12, member 6(Slc12a6)
ZC3HC1	ENSMUSG00000039130	Mus musculus	zinc finger, C3HC type 1(Zc3hc1)
SLC12A9	ENSMUSG00000037344	Mus musculus	solute carrier family 12 (potassium/chloride transporters), member 9(Slc12a9)
CIZ1	ENSMUSG00000039205	Mus musculus	CDKN1A interacting zinc finger protein 1(Ciz1)
STRN3	ENSMUSG00000020954	Mus musculus	striatin, calmodulin binding protein 3(Strn3)
MDGA1	ENSMUSG00000043557	Mus musculus	MAM domain containing glycosylphosphatidylinositol anchor 1(Mdga1)
STRN4	ENSMUSG00000030374	Mus musculus	striatin, calmodulin binding protein 4(Strn4)
OLA1	ENSMUSG00000027108	Mus musculus	Obg-like ATPase 1(Ola1)
GSTT1	ENSMUSG00000001663	Mus musculus	glutathione S-transferase, theta 1(Gstt1)
CGN	ENSMUSG00000068876	Mus musculus	cingulin(Cgn)
HTR7	ENSMUSG00000024798	Mus musculus	5-hydroxytryptamine (serotonin) receptor 7(Htr7)
ADD3	ENSMUSG00000025026	Mus musculus	adducin 3 (gamma)(Add3)
ADD2	ENSMUSG00000030000	Mus musculus	adducin 2 (beta)(Add2)
ADD1	ENSMUSG00000029106	Mus musculus	adducin 1 (alpha)(Add1)
SRSF10	ENSMUSG00000028676	Mus musculus	serine/arginine-rich splicing factor 10(Srsf10)
TXN2	ENSMUSG00000005354	Mus musculus	thioredoxin 2(Txn2)
NOC3L	ENSMUSG00000024999	Mus musculus	NOC3 like DNA replication regulator(Noc3l)
SRSF11	ENSMUSG00000055436	Mus musculus	serine/arginine-rich splicing factor 11(Srsf11)
DMWD	ENSMUSG00000030410	Mus musculus	dystrophia myotonica-containing WD repeat motif(Dmwd)
TIPRL	ENSMUSG00000040843	Mus musculus	TIP41, TOR signalling pathway regulator-like (S. cerevisiae)(Tiprl)
CDA	ENSMUSG00000028755	Mus musculus	cytidine deaminase(Cda)
IL1RAPL1	ENSMUSG00000052372	Mus musculus	interleukin 1 receptor accessory protein-like 1(Il1rapl1)
MOCS1	ENSMUSG00000064120	Mus musculus	molybdenum cofactor synthesis 1(Mocs1)
MOCS3	ENSMUSG00000074576	Mus musculus	molybdenum cofactor synthesis 3(Mocs3)
MOCS2	ENSMUSG00000015536	Mus musculus	molybdenum cofactor synthesis 2(Mocs2)
NOC4L	ENSMUSG00000033294	Mus musculus	NOC4 like(Noc4l)
ADPRM	ENSMUSG00000020910	Mus musculus	ADP-ribose/CDP-alcohol diphosphatase, manganese dependent(Adprm)
ADAL	ENSMUSG00000027259	Mus musculus	adenosine deaminase-like(Adal)
GUSB	ENSMUSG00000025534	Mus musculus	glucuronidase, beta(Gusb)
LGALS1	ENSMUSG00000068220	Mus musculus	lectin, galactose binding, soluble 1(Lgals1)
PMEL	ENSMUSG00000025359	Mus musculus	premelanosome protein(Pmel)
LGALS8	ENSMUSG00000057554	Mus musculus	lectin, galactose binding, soluble 8(Lgals8)
PMF1	ENSMUSG00000028066	Mus musculus	polyamine-modulated factor 1(Pmf1)
TAX1BP3	ENSMUSG00000040158	Mus musculus	Tax1 (human T cell leukemia virus type I) binding protein 3(Tax1bp3)
TAX1BP1	ENSMUSG00000004535	Mus musculus	Tax1 (human T cell leukemia virus type I) binding protein 1(Tax1bp1)
LGALS9	ENSMUSG00000001123	Mus musculus	lectin, galactose binding, soluble 9(Lgals9)
RPS6KL1	ENSMUSG00000019235	Mus musculus	ribosomal protein S6 kinase-like 1(Rps6kl1)
ADPRH	ENSMUSG00000002844	Mus musculus	ADP-ribosylarginine hydrolase(Adprh)
CSPP1	ENSMUSG00000056763	Mus musculus	centrosome and spindle pole associated protein 1(Cspp1)
SOWAHD	ENSMUSG00000044400	Mus musculus	sosondowah ankyrin repeat domain family member D(Sowahd)
PMFBP1	ENSMUSG00000031727	Mus musculus	polyamine modulated factor 1 binding protein 1(Pmfbp1)
SOWAHC	ENSMUSG00000098188	Mus musculus	sosondowah ankyrin repeat domain family member C(Sowahc)
CHCHD10	ENSMUSG00000049422	Mus musculus	coiled-coil-helix-coiled-coil-helix domain containing 10(Chchd10)
NUP62	ENSMUSG00000109511	Mus musculus	nucleoporin 62(Nup62)
FAM43B	ENSMUSG00000078235	Mus musculus	family with sequence similarity 43, member B(Fam43b)
QPRT	ENSMUSG00000030674	Mus musculus	quinolinate phosphoribosyltransferase(Qprt)
FAM43A	ENSMUSG00000046546	Mus musculus	family with sequence similarity 43, member A(Fam43a)
LGALSL	ENSMUSG00000042363	Mus musculus	lectin, galactoside binding-like(Lgalsl)
PRKRIR	ENSMUSG00000030753	Mus musculus	protein-kinase, interferon-inducible double stranded RNA dependent inhibitor, repressor of (P58 repressor)(Prkrir)
PDZK1	ENSMUSG00000038298	Mus musculus	PDZ domain containing 1(Pdzk1)
FAM91A1	ENSMUSG00000037119	Mus musculus	family with sequence similarity 91, member A1(Fam91a1)
ADAR	ENSMUSG00000027951	Mus musculus	adenosine deaminase, RNA-specific(Adar)
SLC16A13	ENSMUSG00000044367	Mus musculus	solute carrier family 16 (monocarboxylic acid transporters), member 13(Slc16a13)
ENY2	ENSMUSG00000022338	Mus musculus	enhancer of yellow 2 homolog (Drosophila)(Eny2)
SLC16A14	ENSMUSG00000026220	Mus musculus	solute carrier family 16 (monocarboxylic acid transporters), member 14(Slc16a14)
SLC27A1	ENSMUSG00000031808	Mus musculus	solute carrier family 27 (fatty acid transporter), member 1(Slc27a1)
SLC16A10	ENSMUSG00000019838	Mus musculus	solute carrier family 16 (monocarboxylic acid transporters), member 10(Slc16a10)
SLC16A11	ENSMUSG00000040938	Mus musculus	solute carrier family 16 (monocarboxylic acid transporters), member 11(Slc16a11)
BCAR1	ENSMUSG00000031955	Mus musculus	breast cancer anti-estrogen resistance 1(Bcar1)
TBX20	ENSMUSG00000031965	Mus musculus	T-box 20(Tbx20)
NFKB1	ENSMUSG00000028163	Mus musculus	nuclear factor of kappa light polypeptide gene enhancer in B cells 1, p105(Nfkb1)
NFKB2	ENSMUSG00000025225	Mus musculus	nuclear factor of kappa light polypeptide gene enhancer in B cells 2, p49/p100(Nfkb2)
WBP4	ENSMUSG00000022023	Mus musculus	WW domain binding protein 4(Wbp4)
WBP1	ENSMUSG00000030035	Mus musculus	WW domain binding protein 1(Wbp1)
CKB	ENSMUSG00000001270	Mus musculus	creatine kinase, brain(Ckb)
WBP2	ENSMUSG00000034341	Mus musculus	WW domain binding protein 2(Wbp2)
SWI5	ENSMUSG00000044627	Mus musculus	SWI5 recombination repair homolog (yeast)(Swi5)
WBP5	ENSMUSG00000042712	Mus musculus	WW domain binding protein 5(Wbp5)
TNFRSF11A	ENSMUSG00000026321	Mus musculus	tumor necrosis factor receptor superfamily, member 11a, NFKB activator(Tnfrsf11a)
TTC30B	ENSMUSG00000075273	Mus musculus	tetratricopeptide repeat domain 30B(Ttc30b)
GSTZ1	ENSMUSG00000021033	Mus musculus	glutathione transferase zeta 1 (maleylacetoacetate isomerase)(Gstz1)
ADAM10	ENSMUSG00000054693	Mus musculus	a disintegrin and metallopeptidase domain 10(Adam10)
TBX15	ENSMUSG00000027868	Mus musculus	T-box 15(Tbx15)
INPPL1	ENSMUSG00000032737	Mus musculus	inositol polyphosphate phosphatase-like 1(Inppl1)
ACKR3	ENSMUSG00000044337	Mus musculus	atypical chemokine receptor 3(Ackr3)
NOC2L	ENSMUSG00000095567	Mus musculus	NOC2 like nucleolar associated transcriptional repressor(Noc2l)
MED6	ENSMUSG00000002679	Mus musculus	mediator complex subunit 6(Med6)
ATP6V1C1	ENSMUSG00000022295	Mus musculus	ATPase, H+ transporting, lysosomal V1 subunit C1(Atp6v1c1)
MED7	ENSMUSG00000020397	Mus musculus	mediator complex subunit 7(Med7)
MED4	ENSMUSG00000022109	Mus musculus	mediator complex subunit 4(Med4)
TNFRSF10B	ENSMUSG00000022074	Mus musculus	tumor necrosis factor receptor superfamily, member 10b(Tnfrsf10b)
H6PD	ENSMUSG00000028980	Mus musculus	hexose-6-phosphate dehydrogenase (glucose 1-dehydrogenase)(H6pd)
LAX1	ENSMUSG00000051998	Mus musculus	lymphocyte transmembrane adaptor 1(Lax1)
MED8	ENSMUSG00000006392	Mus musculus	mediator complex subunit 8(Med8)
MED9	ENSMUSG00000061650	Mus musculus	mediator complex subunit 9(Med9)
SUSD6	ENSMUSG00000021133	Mus musculus	sushi domain containing 6(Susd6)
ADAM17	ENSMUSG00000052593	Mus musculus	a disintegrin and metallopeptidase domain 17(Adam17)
ADAM19	ENSMUSG00000011256	Mus musculus	a disintegrin and metallopeptidase domain 19 (meltrin beta)(Adam19)
SUSD3	ENSMUSG00000021384	Mus musculus	sushi domain containing 3(Susd3)
SLC27A3	ENSMUSG00000027932	Mus musculus	solute carrier family 27 (fatty acid transporter), member 3(Slc27a3)
MECR	ENSMUSG00000028910	Mus musculus	mitochondrial trans-2-enoyl-CoA reductase(Mecr)
TBX18	ENSMUSG00000032419	Mus musculus	T-box18(Tbx18)
SLC27A2	ENSMUSG00000027359	Mus musculus	solute carrier family 27 (fatty acid transporter), member 2(Slc27a2)
SLC27A5	ENSMUSG00000030382	Mus musculus	solute carrier family 27 (fatty acid transporter), member 5(Slc27a5)
ADAM15	ENSMUSG00000028041	Mus musculus	a disintegrin and metallopeptidase domain 15 (metargidin)(Adam15)
MED1	ENSMUSG00000018160	Mus musculus	mediator complex subunit 1(Med1)
SLC27A4	ENSMUSG00000059316	Mus musculus	solute carrier family 27 (fatty acid transporter), member 4(Slc27a4)
BCAT1	ENSMUSG00000030268	Mus musculus	branched chain aminotransferase 1, cytosolic(Bcat1)
CAB39L	ENSMUSG00000021981	Mus musculus	calcium binding protein 39-like(Cab39l)
BCAT2	ENSMUSG00000030826	Mus musculus	branched chain aminotransferase 2, mitochondrial(Bcat2)
BDP1	ENSMUSG00000049658	Mus musculus	B double prime 1, subunit of RNA polymerase III transcription initiation factor IIIB(Bdp1)
NFS1	ENSMUSG00000027618	Mus musculus	nitrogen fixation gene 1 (S. cerevisiae)(Nfs1)
RPL27A	ENSMUSG00000046364	Mus musculus	ribosomal protein L27A(Rpl27a)
ATP6V1G2	ENSMUSG00000024403	Mus musculus	ATPase, H+ transporting, lysosomal V1 subunit G2(Atp6v1g2)
COX7A2L	ENSMUSG00000024248	Mus musculus	cytochrome c oxidase subunit VIIa polypeptide 2-like(Cox7a2l)
ATP6V1G1	ENSMUSG00000039105	Mus musculus	ATPase, H+ transporting, lysosomal V1 subunit G1(Atp6v1g1)
CIC	ENSMUSG00000005442	Mus musculus	capicua transcriptional repressor(Cic)
FAM46A	ENSMUSG00000032265	Mus musculus	family with sequence similarity 46, member A(Fam46a)
FAM46C	ENSMUSG00000044468	Mus musculus	family with sequence similarity 46, member C(Fam46c)
FAM46B	ENSMUSG00000046694	Mus musculus	family with sequence similarity 46, member B(Fam46b)
CIR1	ENSMUSG00000041777	Mus musculus	corepressor interacting with RBPJ, 1(Cir1)
CHM	ENSMUSG00000025531	Mus musculus	choroidermia (RAB escort protein 1)(Chm)
ETFDH	ENSMUSG00000027809	Mus musculus	electron transferring flavoprotein, dehydrogenase(Etfdh)
MEG3	ENSMUSG00000021268	Mus musculus	maternally expressed 3(Meg3)
CLVS1	ENSMUSG00000041216	Mus musculus	clavesin 1(Clvs1)
BCAS3	ENSMUSG00000059439	Mus musculus	breast carcinoma amplified sequence 3(Bcas3)
BCAS2	ENSMUSG00000005687	Mus musculus	breast carcinoma amplified sequence 2(Bcas2)
MAPK11	ENSMUSG00000053137	Mus musculus	mitogen-activated protein kinase 11(Mapk11)
CISH	ENSMUSG00000032578	Mus musculus	cytokine inducible SH2-containing protein(Cish)
FAM47E	ENSMUSG00000057068	Mus musculus	family with sequence similarity 47, member E(Fam47e)
BRMS1	ENSMUSG00000080268	Mus musculus	breast cancer metastasis-suppressor 1(Brms1)
NUPR1	ENSMUSG00000030717	Mus musculus	nuclear protein transcription regulator 1(Nupr1)
LAYN	ENSMUSG00000060594	Mus musculus	layilin(Layn)
MAPK13	ENSMUSG00000004864	Mus musculus	mitogen-activated protein kinase 13(Mapk13)
ATP6V1E1	ENSMUSG00000019210	Mus musculus	ATPase, H+ transporting, lysosomal V1 subunit E1(Atp6v1e1)
MAPK14	ENSMUSG00000053436	Mus musculus	mitogen-activated protein kinase 14(Mapk14)
MAPK15	ENSMUSG00000063704	Mus musculus	mitogen-activated protein kinase 15(Mapk15)
CIT	ENSMUSG00000029516	Mus musculus	citron(Cit)
BCAR3	ENSMUSG00000028121	Mus musculus	breast cancer anti-estrogen resistance 3(Bcar3)
ANKRD9	ENSMUSG00000037904	Mus musculus	ankyrin repeat domain 9(Ankrd9)
CSPG4	ENSMUSG00000032911	Mus musculus	chondroitin sulfate proteoglycan 4(Cspg4)
CNP	ENSMUSG00000006782	Mus musculus	2',3'-cyclic nucleotide 3' phosphodiesterase(Cnp)
ANKRD1	ENSMUSG00000024803	Mus musculus	ankyrin repeat domain 1 (cardiac muscle)(Ankrd1)
KLHL4	ENSMUSG00000025597	Mus musculus	kelch-like 4(Klhl4)
DMPK	ENSMUSG00000030409	Mus musculus	dystrophia myotonica-protein kinase(Dmpk)
KLHL7	ENSMUSG00000028986	Mus musculus	kelch-like 7(Klhl7)
GSTM2	ENSMUSG00000040562	Mus musculus	glutathione S-transferase, mu 2(Gstm2)
CIPC	ENSMUSG00000034157	Mus musculus	CLOCK interacting protein, circadian(Cipc)
KLHL8	ENSMUSG00000029312	Mus musculus	kelch-like 8(Klhl8)
KLHL5	ENSMUSG00000054920	Mus musculus	kelch-like 5(Klhl5)
CISD2	ENSMUSG00000028165	Mus musculus	CDGSH iron sulfur domain 2(Cisd2)
GSTM3	ENSMUSG00000004038	Mus musculus	glutathione S-transferase, mu 3(Gstm3)
OCSTAMP	ENSMUSG00000027670	Mus musculus	osteoclast stimulatory transmembrane protein(Ocstamp)
CISD1	ENSMUSG00000037710	Mus musculus	CDGSH iron sulfur domain 1(Cisd1)
KLHL6	ENSMUSG00000043008	Mus musculus	kelch-like 6(Klhl6)
GSTM4	ENSMUSG00000027890	Mus musculus	glutathione S-transferase, mu 4(Gstm4)
CISD3	ENSMUSG00000078695	Mus musculus	CDGSH iron sulfur domain 3(Cisd3)
KLHL9	ENSMUSG00000070923	Mus musculus	kelch-like 9(Klhl9)
GP2	ENSMUSG00000030954	Mus musculus	glycoprotein 2 (zymogen granule membrane)(Gp2)
RNF38	ENSMUSG00000035696	Mus musculus	ring finger protein 38(Rnf38)
TFB2M	ENSMUSG00000026492	Mus musculus	transcription factor B2, mitochondrial(Tfb2m)
RNF34	ENSMUSG00000029474	Mus musculus	ring finger protein 34(Rnf34)
RNF32	ENSMUSG00000029130	Mus musculus	ring finger protein 32(Rnf32)
SCAMP4	ENSMUSG00000078441	Mus musculus	secretory carrier membrane protein 4(Scamp4)
RNF31	ENSMUSG00000047098	Mus musculus	ring finger protein 31(Rnf31)
SCAMP5	ENSMUSG00000040722	Mus musculus	secretory carrier membrane protein 5(Scamp5)
SCAMP1	ENSMUSG00000021687	Mus musculus	secretory carrier membrane protein 1(Scamp1)
ARGLU1	ENSMUSG00000040459	Mus musculus	arginine and glutamate rich 1(Arglu1)
SCAMP3	ENSMUSG00000028049	Mus musculus	secretory carrier membrane protein 3(Scamp3)
SCAMP2	ENSMUSG00000040188	Mus musculus	secretory carrier membrane protein 2(Scamp2)
SOCS2	ENSMUSG00000020027	Mus musculus	suppressor of cytokine signaling 2(Socs2)
SOCS3	ENSMUSG00000053113	Mus musculus	suppressor of cytokine signaling 3(Socs3)
SOCS1	ENSMUSG00000038037	Mus musculus	suppressor of cytokine signaling 1(Socs1)
GTF2IRD2	ENSMUSG00000015942	Mus musculus	GTF2I repeat domain containing 2(Gtf2ird2)
SOCS7	ENSMUSG00000038485	Mus musculus	suppressor of cytokine signaling 7(Socs7)
SOCS4	ENSMUSG00000048379	Mus musculus	suppressor of cytokine signaling 4(Socs4)
SOCS5	ENSMUSG00000037104	Mus musculus	suppressor of cytokine signaling 5(Socs5)
NUPL2	ENSMUSG00000048439	Mus musculus	nucleoporin like 2(Nupl2)
NUPL1	ENSMUSG00000063895	Mus musculus	nucleoporin like 1(Nupl1)
PTHLH	ENSMUSG00000048776	Mus musculus	parathyroid hormone-like peptide(Pthlh)
GNS	ENSMUSG00000034707	Mus musculus	glucosamine (N-acetyl)-6-sulfatase(Gns)
SLITRK1	ENSMUSG00000075478	Mus musculus	SLIT and NTRK-like family, member 1(Slitrk1)
SLITRK4	ENSMUSG00000046699	Mus musculus	SLIT and NTRK-like family, member 4(Slitrk4)
FOPNL	ENSMUSG00000022677	Mus musculus	Fgfr1op N-terminal like(Fopnl)
LAT2	ENSMUSG00000040751	Mus musculus	linker for activation of T cells family, member 2(Lat2)
LYNX1	ENSMUSG00000022594	Mus musculus	Ly6/neurotoxin 1(Lynx1)
CPE	ENSMUSG00000037852	Mus musculus	carboxypeptidase E(Cpe)
GTF2IRD1	ENSMUSG00000023079	Mus musculus	general transcription factor II I repeat domain-containing 1(Gtf2ird1)
RNF25	ENSMUSG00000026171	Mus musculus	ring finger protein 25(Rnf25)
RNF24	ENSMUSG00000048911	Mus musculus	ring finger protein 24(Rnf24)
RNF26	ENSMUSG00000053128	Mus musculus	ring finger protein 26(Rnf26)
CPD	ENSMUSG00000020841	Mus musculus	carboxypeptidase D(Cpd)
SLC38A1	ENSMUSG00000023169	Mus musculus	solute carrier family 38, member 1(Slc38a1)
SWT1	ENSMUSG00000052748	Mus musculus	SWT1 RNA endoribonuclease homolog (S. cerevisiae)(Swt1)
VPS26B	ENSMUSG00000031988	Mus musculus	VPS26 retromer complex component B(Vps26b)
TFB1M	ENSMUSG00000036983	Mus musculus	transcription factor B1, mitochondrial(Tfb1m)
SLITRK6	ENSMUSG00000045871	Mus musculus	SLIT and NTRK-like family, member 6(Slitrk6)
VPS26A	ENSMUSG00000020078	Mus musculus	VPS26 retromer complex component A(Vps26a)
RNF20	ENSMUSG00000028309	Mus musculus	ring finger protein 20(Rnf20)
SLITRK5	ENSMUSG00000033214	Mus musculus	SLIT and NTRK-like family, member 5(Slitrk5)
ANAPC16	ENSMUSG00000020107	Mus musculus	anaphase promoting complex subunit 16(Anapc16)
SLC38A5	ENSMUSG00000031170	Mus musculus	solute carrier family 38, member 5(Slc38a5)
SLC38A3	ENSMUSG00000010064	Mus musculus	solute carrier family 38, member 3(Slc38a3)
SLC38A2	ENSMUSG00000022462	Mus musculus	solute carrier family 38, member 2(Slc38a2)
TSHZ1	ENSMUSG00000046982	Mus musculus	teashirt zinc finger family member 1(Tshz1)
TFAP4	ENSMUSG00000005718	Mus musculus	transcription factor AP4(Tfap4)
SLC38A9	ENSMUSG00000047789	Mus musculus	solute carrier family 38, member 9(Slc38a9)
ANAPC13	ENSMUSG00000035048	Mus musculus	anaphase promoting complex subunit 13(Anapc13)
GNE	ENSMUSG00000028479	Mus musculus	glucosamine (UDP-N-acetyl)-2-epimerase/N-acetylmannosamine kinase(Gne)
STRAP	ENSMUSG00000030224	Mus musculus	serine/threonine kinase receptor associated protein(Strap)
SLC38A7	ENSMUSG00000036534	Mus musculus	solute carrier family 38, member 7(Slc38a7)
PNPT1	ENSMUSG00000020464	Mus musculus	polyribonucleotide nucleotidyltransferase 1(Pnpt1)
SLC38A6	ENSMUSG00000044712	Mus musculus	solute carrier family 38, member 6(Slc38a6)
CLU	ENSMUSG00000022037	Mus musculus	clusterin(Clu)
ONECUT2	ENSMUSG00000045991	Mus musculus	one cut domain, family member 2(Onecut2)
ANAPC15	ENSMUSG00000030649	Mus musculus	anaphase prompoting complex C subunit 15(Anapc15)
NINJ1	ENSMUSG00000037966	Mus musculus	ninjurin 1(Ninj1)
ANAPC10	ENSMUSG00000036977	Mus musculus	anaphase promoting complex subunit 10(Anapc10)
ATP6V1B2	ENSMUSG00000006273	Mus musculus	ATPase, H+ transporting, lysosomal V1 subunit B2(Atp6v1b2)
ANAPC11	ENSMUSG00000025135	Mus musculus	anaphase promoting complex subunit 11(Anapc11)
ENSA	ENSMUSG00000038619	Mus musculus	endosulfine alpha(Ensa)
FTH1	ENSMUSG00000024661	Mus musculus	ferritin heavy polypeptide 1(Fth1)
GADD45GIP1	ENSMUSG00000033751	Mus musculus	growth arrest and DNA-damage-inducible, gamma interacting protein 1(Gadd45gip1)
GSTK1	ENSMUSG00000029864	Mus musculus	glutathione S-transferase kappa 1(Gstk1)
RNF11	ENSMUSG00000028557	Mus musculus	ring finger protein 11(Rnf11)
SPIDR	ENSMUSG00000041974	Mus musculus	scaffolding protein involved in DNA repair(Spidr)
RNF10	ENSMUSG00000041740	Mus musculus	ring finger protein 10(Rnf10)
STRBP	ENSMUSG00000026915	Mus musculus	spermatid perinuclear RNA binding protein(Strbp)
AXIN2	ENSMUSG00000000142	Mus musculus	axin 2(Axin2)
AXIN1	ENSMUSG00000024182	Mus musculus	axin 1(Axin1)
MEST	ENSMUSG00000051855	Mus musculus	mesoderm specific transcript(Mest)
RNF13	ENSMUSG00000036503	Mus musculus	ring finger protein 13(Rnf13)
NFE2	ENSMUSG00000058794	Mus musculus	nuclear factor, erythroid derived 2(Nfe2)
ACY1	ENSMUSG00000023262	Mus musculus	aminoacylase 1(Acy1)
ACY3	ENSMUSG00000024866	Mus musculus	aspartoacylase (aminoacylase) 3(Acy3)
CINP	ENSMUSG00000021276	Mus musculus	cyclin-dependent kinase 2 interacting protein(Cinp)
TXNDC12	ENSMUSG00000028567	Mus musculus	thioredoxin domain containing 12 (endoplasmic reticulum)(Txndc12)
TXNDC11	ENSMUSG00000022498	Mus musculus	thioredoxin domain containing 11(Txndc11)
TXNDC17	ENSMUSG00000020803	Mus musculus	thioredoxin domain containing 17(Txndc17)
TXNDC16	ENSMUSG00000021830	Mus musculus	thioredoxin domain containing 16(Txndc16)
GLS	ENSMUSG00000026103	Mus musculus	glutaminase(Gls)
TXNDC15	ENSMUSG00000021497	Mus musculus	thioredoxin domain containing 15(Txndc15)
AHCYL1	ENSMUSG00000027893	Mus musculus	S-adenosylhomocysteine hydrolase-like 1(Ahcyl1)
AHCYL2	ENSMUSG00000029772	Mus musculus	S-adenosylhomocysteine hydrolase-like 2(Ahcyl2)
FPGS	ENSMUSG00000009566	Mus musculus	folylpolyglutamyl synthetase(Fpgs)
FPGT	ENSMUSG00000053870	Mus musculus	fucose-1-phosphate guanylyltransferase(Fpgt)
GUK1	ENSMUSG00000020444	Mus musculus	guanylate kinase 1(Guk1)
DMTN	ENSMUSG00000022099	Mus musculus	dematin actin binding protein(Dmtn)
D2HGDH	ENSMUSG00000073609	Mus musculus	D-2-hydroxyglutarate dehydrogenase(D2hgdh)
IL21R	ENSMUSG00000030745	Mus musculus	interleukin 21 receptor(Il21r)
EPS15L1	ENSMUSG00000006276	Mus musculus	epidermal growth factor receptor pathway substrate 15-like 1(Eps15l1)
CRX	ENSMUSG00000041578	Mus musculus	cone-rod homeobox(Crx)
GSS	ENSMUSG00000027610	Mus musculus	glutathione synthetase(Gss)
MEN1	ENSMUSG00000024947	Mus musculus	multiple endocrine neoplasia 1(Men1)
GSR	ENSMUSG00000031584	Mus musculus	glutathione reductase(Gsr)
CAMSAP2	ENSMUSG00000041570	Mus musculus	calmodulin regulated spectrin-associated protein family, member 2(Camsap2)
CAMSAP1	ENSMUSG00000026933	Mus musculus	calmodulin regulated spectrin-associated protein 1(Camsap1)
PXMP4	ENSMUSG00000000876	Mus musculus	peroxisomal membrane protein 4(Pxmp4)
PXMP2	ENSMUSG00000029499	Mus musculus	peroxisomal membrane protein 2(Pxmp2)
CSK	ENSMUSG00000032312	Mus musculus	c-src tyrosine kinase(Csk)
TTC39B	ENSMUSG00000038172	Mus musculus	tetratricopeptide repeat domain 39B(Ttc39b)
GSC	ENSMUSG00000021095	Mus musculus	goosecoid homeobox(Gsc)
ANKRA2	ENSMUSG00000021661	Mus musculus	ankyrin repeat, family A (RFXANK-like), 2(Ankra2)
CAMSAP3	ENSMUSG00000044433	Mus musculus	calmodulin regulated spectrin-associated protein family, member 3(Camsap3)
DAPK3	ENSMUSG00000034974	Mus musculus	death-associated protein kinase 3(Dapk3)
DAPK1	ENSMUSG00000021559	Mus musculus	death associated protein kinase 1(Dapk1)
SPDYA	ENSMUSG00000052525	Mus musculus	speedy/RINGO cell cycle regulator family, member A(Spdya)
LAP3	ENSMUSG00000039682	Mus musculus	leucine aminopeptidase 3(Lap3)
CTH	ENSMUSG00000028179	Mus musculus	cystathionase (cystathionine gamma-lyase)(Cth)
HIPK1	ENSMUSG00000008730	Mus musculus	homeodomain interacting protein kinase 1(Hipk1)
GRN	ENSMUSG00000034708	Mus musculus	granulin(Grn)
HIPK3	ENSMUSG00000027177	Mus musculus	homeodomain interacting protein kinase 3(Hipk3)
HIPK4	ENSMUSG00000040424	Mus musculus	homeodomain interacting protein kinase 4(Hipk4)
MELK	ENSMUSG00000035683	Mus musculus	maternal embryonic leucine zipper kinase(Melk)
GSTP1	ENSMUSG00000060803	Mus musculus	glutathione S-transferase, pi 1(Gstp1)
GLTSCR2	ENSMUSG00000041560	Mus musculus	glioma tumor suppressor candidate region gene 2(Gltscr2)
GLTSCR1	ENSMUSG00000070808	Mus musculus	glioma tumor suppressor candidate region gene 1(Gltscr1)
ADPGK	ENSMUSG00000025236	Mus musculus	ADP-dependent glucokinase(Adpgk)
GATSL3	ENSMUSG00000020424	Mus musculus	GATS protein-like 3(Gatsl3)
CPZ	ENSMUSG00000036596	Mus musculus	carboxypeptidase Z(Cpz)
LINGO1	ENSMUSG00000049556	Mus musculus	leucine rich repeat and Ig domain containing 1(Lingo1)
SH3GLB2	ENSMUSG00000026860	Mus musculus	SH3-domain GRB2-like endophilin B2(Sh3glb2)
HJURP	ENSMUSG00000044783	Mus musculus	Holliday junction recognition protein(Hjurp)
SH3GLB1	ENSMUSG00000037062	Mus musculus	SH3-domain GRB2-like B1 (endophilin)(Sh3glb1)
LARS	ENSMUSG00000024493	Mus musculus	leucyl-tRNA synthetase(Lars)
ENO3	ENSMUSG00000060600	Mus musculus	enolase 3, beta muscle(Eno3)
BDH2	ENSMUSG00000028167	Mus musculus	3-hydroxybutyrate dehydrogenase, type 2(Bdh2)
ENO4	ENSMUSG00000048029	Mus musculus	enolase 4(Eno4)
GSTO2	ENSMUSG00000025069	Mus musculus	glutathione S-transferase omega 2(Gsto2)
GSTO1	ENSMUSG00000025068	Mus musculus	glutathione S-transferase omega 1(Gsto1)
GUF1	ENSMUSG00000029208	Mus musculus	GUF1 homolog, GTPase(Guf1)
BDH1	ENSMUSG00000046598	Mus musculus	3-hydroxybutyrate dehydrogenase, type 1(Bdh1)
ENO1	ENSMUSG00000063524	Mus musculus	enolase 1, alpha non-neuron(Eno1)
ACTB	ENSMUSG00000029580	Mus musculus	actin, beta(Actb)
CPPED1	ENSMUSG00000065979	Mus musculus	calcineurin-like phosphoesterase domain containing 1(Cpped1)
ATXN7L1	ENSMUSG00000020564	Mus musculus	ataxin 7-like 1(Atxn7l1)
ISOC1	ENSMUSG00000024601	Mus musculus	isochorismatase domain containing 1(Isoc1)
ATXN7L3	ENSMUSG00000059995	Mus musculus	ataxin 7-like 3(Atxn7l3)
ATXN7L2	ENSMUSG00000048997	Mus musculus	ataxin 7-like 2(Atxn7l2)
DIS3	ENSMUSG00000033166	Mus musculus	DIS3 homolog, exosome endoribonuclease and 3'-5' exoribonuclease(Dis3)
RNF43	ENSMUSG00000034177	Mus musculus	ring finger protein 43(Rnf43)
RNF44	ENSMUSG00000034928	Mus musculus	ring finger protein 44(Rnf44)
CRH	ENSMUSG00000049796	Mus musculus	corticotropin releasing hormone(Crh)
GPT	ENSMUSG00000022546	Mus musculus	glutamic pyruvic transaminase, soluble(Gpt)
NFIC	ENSMUSG00000055053	Mus musculus	nuclear factor I/C(Nfic)
CRK	ENSMUSG00000017776	Mus musculus	v-crk avian sarcoma virus CT10 oncogene homolog(Crk)
RNF40	ENSMUSG00000030816	Mus musculus	ring finger protein 40(Rnf40)
NFIA	ENSMUSG00000028565	Mus musculus	nuclear factor I/A(Nfia)
RNF41	ENSMUSG00000025373	Mus musculus	ring finger protein 41(Rnf41)
NFIB	ENSMUSG00000008575	Mus musculus	nuclear factor I/B(Nfib)
LDHB	ENSMUSG00000030246	Mus musculus	lactate dehydrogenase B(Ldhb)
LDHA	ENSMUSG00000063229	Mus musculus	lactate dehydrogenase A(Ldha)
PPP2R5B	ENSMUSG00000024777	Mus musculus	protein phosphatase 2, regulatory subunit B', beta(Ppp2r5b)
SGMS2	ENSMUSG00000050931	Mus musculus	sphingomyelin synthase 2(Sgms2)
PPP2R5A	ENSMUSG00000026626	Mus musculus	protein phosphatase 2, regulatory subunit B', alpha(Ppp2r5a)
NEAT1	ENSMUSG00000092274	Mus musculus	nuclear paraspeckle assembly transcript 1 (non-protein coding)(Neat1)
PPP2R5D	ENSMUSG00000059409	Mus musculus	protein phosphatase 2, regulatory subunit B', delta(Ppp2r5d)
PPP2R5C	ENSMUSG00000017843	Mus musculus	protein phosphatase 2, regulatory subunit B', gamma(Ppp2r5c)
LDHD	ENSMUSG00000031958	Mus musculus	lactate dehydrogenase D(Ldhd)
PGAM1	ENSMUSG00000011752	Mus musculus	phosphoglycerate mutase 1(Pgam1)
PGAM2	ENSMUSG00000020475	Mus musculus	phosphoglycerate mutase 2(Pgam2)
SGMS1	ENSMUSG00000040451	Mus musculus	sphingomyelin synthase 1(Sgms1)
EPC1	ENSMUSG00000024240	Mus musculus	enhancer of polycomb homolog 1 (Drosophila)(Epc1)
EPC2	ENSMUSG00000069495	Mus musculus	enhancer of polycomb homolog 2 (Drosophila)(Epc2)
MC1R	ENSMUSG00000074037	Mus musculus	melanocortin 1 receptor(Mc1r)
PGAM5	ENSMUSG00000029500	Mus musculus	phosphoglycerate mutase family member 5(Pgam5)
ILK	ENSMUSG00000030890	Mus musculus	integrin linked kinase(Ilk)
SH3GL3	ENSMUSG00000030638	Mus musculus	SH3-domain GRB2-like 3(Sh3gl3)
KIF5B	ENSMUSG00000006740	Mus musculus	kinesin family member 5B(Kif5b)
KIF5C	ENSMUSG00000026764	Mus musculus	kinesin family member 5C(Kif5c)
F7	ENSMUSG00000031443	Mus musculus	coagulation factor VII(F7)
F5	ENSMUSG00000026579	Mus musculus	coagulation factor V(F5)
TMPRSS11D	ENSMUSG00000061259	Mus musculus	transmembrane protease, serine 11d(Tmprss11d)
F3	ENSMUSG00000028128	Mus musculus	coagulation factor III(F3)
F2	ENSMUSG00000027249	Mus musculus	coagulation factor II(F2)
TMPRSS11F	ENSMUSG00000048764	Mus musculus	transmembrane protease, serine 11f(Tmprss11f)
NLE1	ENSMUSG00000020692	Mus musculus	notchless homolog 1 (Drosophila)(Nle1)
ABAT	ENSMUSG00000057880	Mus musculus	4-aminobutyrate aminotransferase(Abat)
PPP2R5E	ENSMUSG00000021051	Mus musculus	protein phosphatase 2, regulatory subunit B', epsilon(Ppp2r5e)
PIDD1	ENSMUSG00000025507	Mus musculus	p53 induced death domain protein 1(Pidd1)
SLC30A10	ENSMUSG00000026614	Mus musculus	solute carrier family 30, member 10(Slc30a10)
SH3GL2	ENSMUSG00000028488	Mus musculus	SH3-domain GRB2-like 2(Sh3gl2)
SH3GL1	ENSMUSG00000003200	Mus musculus	SH3-domain GRB2-like 1(Sh3gl1)
RAD23B	ENSMUSG00000028426	Mus musculus	RAD23 homolog B, nucleotide excision repair protein(Rad23b)
PPP2R3A	ENSMUSG00000043154	Mus musculus	protein phosphatase 2, regulatory subunit B'', alpha(Ppp2r3a)
TNRC18	ENSMUSG00000039477	Mus musculus	trinucleotide repeat containing 18(Tnrc18)
RAD23A	ENSMUSG00000003813	Mus musculus	RAD23 homolog A, nucleotide excision repair protein(Rad23a)
PDSS1	ENSMUSG00000026784	Mus musculus	prenyl (solanesyl) diphosphate synthase, subunit 1(Pdss1)
PDSS2	ENSMUSG00000038240	Mus musculus	prenyl (solanesyl) diphosphate synthase, subunit 2(Pdss2)
ALCAM	ENSMUSG00000022636	Mus musculus	activated leukocyte cell adhesion molecule(Alcam)
VWA5B1	ENSMUSG00000028753	Mus musculus	von Willebrand factor A domain containing 5B1(Vwa5b1)
GOLPH3L	ENSMUSG00000046519	Mus musculus	golgi phosphoprotein 3-like(Golph3l)
RCCD1	ENSMUSG00000038930	Mus musculus	RCC1 domain containing 1(Rccd1)
OBSL1	ENSMUSG00000026211	Mus musculus	obscurin-like 1(Obsl1)
SPERT	ENSMUSG00000034913	Mus musculus	spermatid associated(Spert)
SSSCA1	ENSMUSG00000079478	Mus musculus	Sjogren's syndrome/scleroderma autoantigen 1 homolog (human)(Sssca1)
ASXL2	ENSMUSG00000037486	Mus musculus	additional sex combs like 2 (Drosophila)(Asxl2)
KIF3B	ENSMUSG00000027475	Mus musculus	kinesin family member 3B(Kif3b)
ASXL1	ENSMUSG00000042548	Mus musculus	additional sex combs like 1(Asxl1)
KIF3C	ENSMUSG00000020668	Mus musculus	kinesin family member 3C(Kif3c)
RGS9BP	ENSMUSG00000056043	Mus musculus	regulator of G-protein signalling 9 binding protein(Rgs9bp)
MAB21L3	ENSMUSG00000044313	Mus musculus	mab-21-like 3 (C. elegans)(Mab21l3)
GK	ENSMUSG00000025059	Mus musculus	glycerol kinase(Gk)
MAB21L1	ENSMUSG00000056947	Mus musculus	mab-21-like 1 (C. elegans)(Mab21l1)
MAB21L2	ENSMUSG00000057777	Mus musculus	mab-21-like 2 (C. elegans)(Mab21l2)
PPP2R3C	ENSMUSG00000021022	Mus musculus	protein phosphatase 2, regulatory subunit B'', gamma(Ppp2r3c)
ELF1	ENSMUSG00000036461	Mus musculus	E74-like factor 1(Elf1)
KCNAB3	ENSMUSG00000018470	Mus musculus	potassium voltage-gated channel, shaker-related subfamily, beta member 3(Kcnab3)
ERCC6L2	ENSMUSG00000021470	Mus musculus	excision repair cross-complementing rodent repair deficiency, complementation group 6 like 2(Ercc6l2)
KCNAB2	ENSMUSG00000028931	Mus musculus	potassium voltage-gated channel, shaker-related subfamily, beta member 2(Kcnab2)
LDLR	ENSMUSG00000032193	Mus musculus	low density lipoprotein receptor(Ldlr)
SLC20A1	ENSMUSG00000027397	Mus musculus	solute carrier family 20, member 1(Slc20a1)
ELF3	ENSMUSG00000003051	Mus musculus	E74-like factor 3(Elf3)
ELF4	ENSMUSG00000031103	Mus musculus	E74-like factor 4 (ets domain transcription factor)(Elf4)
SLC20A2	ENSMUSG00000037656	Mus musculus	solute carrier family 20, member 2(Slc20a2)
CFAP221	ENSMUSG00000036962	Mus musculus	cilia and flagella associated protein 221(Cfap221)
EIF2A	ENSMUSG00000027810	Mus musculus	eukaryotic translation initiation factor 2A(Eif2a)
PMVK	ENSMUSG00000027952	Mus musculus	phosphomevalonate kinase(Pmvk)
EIF2D	ENSMUSG00000026427	Mus musculus	eukaryotic translation initiation factor 2D(Eif2d)
ST6GALNAC6	ENSMUSG00000026811	Mus musculus	ST6 (alpha-N-acetyl-neuraminyl-2,3-beta-galactosyl-1,3)-N-acetylgalactosaminide alpha-2,6-sialyltransferase 6(St6galnac6)
ST6GALNAC4	ENSMUSG00000079442	Mus musculus	ST6 (alpha-N-acetyl-neuraminyl-2,3-beta-galactosyl-1,3)-N-acetylgalactosaminide alpha-2,6-sialyltransferase 4(St6galnac4)
EPG5	ENSMUSG00000039840	Mus musculus	ectopic P-granules autophagy protein 5 homolog (C. elegans)(Epg5)
IL13RA1	ENSMUSG00000017057	Mus musculus	interleukin 13 receptor, alpha 1(Il13ra1)
DXO	ENSMUSG00000040482	Mus musculus	decapping exoribonuclease(Dxo)
GFOD1	ENSMUSG00000051335	Mus musculus	glucose-fructose oxidoreductase domain containing 1(Gfod1)
GFOD2	ENSMUSG00000013150	Mus musculus	glucose-fructose oxidoreductase domain containing 2(Gfod2)
PGAP3	ENSMUSG00000038208	Mus musculus	post-GPI attachment to proteins 3(Pgap3)
PGAP2	ENSMUSG00000030990	Mus musculus	post-GPI attachment to proteins 2(Pgap2)
HYAL2	ENSMUSG00000010047	Mus musculus	hyaluronoglucosaminidase 2(Hyal2)
HIST1H1E	ENSMUSG00000051627	Mus musculus	histone cluster 1, H1e(Hist1h1e)
HYAL3	ENSMUSG00000036091	Mus musculus	hyaluronoglucosaminidase 3(Hyal3)
HIST1H1D	ENSMUSG00000052565	Mus musculus	histone cluster 1, H1d(Hist1h1d)
HIST1H1C	ENSMUSG00000036181	Mus musculus	histone cluster 1, H1c(Hist1h1c)
HIST1H1B	ENSMUSG00000058773	Mus musculus	histone cluster 1, H1b(Hist1h1b)
HIST1H1A	ENSMUSG00000049539	Mus musculus	histone cluster 1, H1a(Hist1h1a)
PGAP1	ENSMUSG00000073678	Mus musculus	post-GPI attachment to proteins 1(Pgap1)
EIF1B	ENSMUSG00000006941	Mus musculus	eukaryotic translation initiation factor 1B(Eif1b)
MTMR12	ENSMUSG00000039458	Mus musculus	myotubularin related protein 12(Mtmr12)
MTMR11	ENSMUSG00000045934	Mus musculus	myotubularin related protein 11(Mtmr11)
CARD11	ENSMUSG00000036526	Mus musculus	caspase recruitment domain family, member 11(Card11)
DOK1	ENSMUSG00000068335	Mus musculus	docking protein 1(Dok1)
DOK2	ENSMUSG00000022102	Mus musculus	docking protein 2(Dok2)
MTMR14	ENSMUSG00000030269	Mus musculus	myotubularin related protein 14(Mtmr14)
DOK3	ENSMUSG00000035711	Mus musculus	docking protein 3(Dok3)
DOK4	ENSMUSG00000040631	Mus musculus	docking protein 4(Dok4)
MTMR10	ENSMUSG00000030522	Mus musculus	myotubularin related protein 10(Mtmr10)
VCAN	ENSMUSG00000021614	Mus musculus	versican(Vcan)
METTL11B	ENSMUSG00000040113	Mus musculus	methyltransferase like 11B(Mettl11b)
SSU72	ENSMUSG00000029038	Mus musculus	Ssu72 RNA polymerase II CTD phosphatase homolog (yeast)(Ssu72)
ZMYND12	ENSMUSG00000070806	Mus musculus	zinc finger, MYND domain containing 12(Zmynd12)
ZMYND11	ENSMUSG00000021156	Mus musculus	zinc finger, MYND domain containing 11(Zmynd11)
MEIG1	ENSMUSG00000026650	Mus musculus	meiosis expressed gene 1(Meig1)
EXOC7	ENSMUSG00000020792	Mus musculus	exocyst complex component 7(Exoc7)
C3	ENSMUSG00000024164	Mus musculus	complement component 3(C3)
EXOC8	ENSMUSG00000074030	Mus musculus	exocyst complex component 8(Exoc8)
ABI3	ENSMUSG00000018381	Mus musculus	ABI gene family, member 3(Abi3)
ABI2	ENSMUSG00000026782	Mus musculus	abl-interactor 2(Abi2)
ABI1	ENSMUSG00000058835	Mus musculus	abl-interactor 1(Abi1)
HDGFRP2	ENSMUSG00000002833	Mus musculus	hepatoma-derived growth factor, related protein 2(Hdgfrp2)
EXOC4	ENSMUSG00000029763	Mus musculus	exocyst complex component 4(Exoc4)
EXOC5	ENSMUSG00000061244	Mus musculus	exocyst complex component 5(Exoc5)
MANBAL	ENSMUSG00000063019	Mus musculus	mannosidase, beta A, lysosomal-like(Manbal)
EXOC2	ENSMUSG00000021357	Mus musculus	exocyst complex component 2(Exoc2)
EXOC1	ENSMUSG00000036435	Mus musculus	exocyst complex component 1(Exoc1)
IL4	ENSMUSG00000000869	Mus musculus	interleukin 4(Il4)
LRSAM1	ENSMUSG00000026792	Mus musculus	leucine rich repeat and sterile alpha motif containing 1(Lrsam1)
SLC8A2	ENSMUSG00000030376	Mus musculus	solute carrier family 8 (sodium/calcium exchanger), member 2(Slc8a2)
IL7	ENSMUSG00000040329	Mus musculus	interleukin 7(Il7)
RMDN1	ENSMUSG00000028229	Mus musculus	regulator of microtubule dynamics 1(Rmdn1)
RMDN3	ENSMUSG00000070730	Mus musculus	regulator of microtubule dynamics 3(Rmdn3)
CS	ENSMUSG00000005683	Mus musculus	citrate synthase(Cs)
NTNG2	ENSMUSG00000035513	Mus musculus	netrin G2(Ntng2)
APPL1	ENSMUSG00000040760	Mus musculus	adaptor protein, phosphotyrosine interaction, PH domain and leucine zipper containing 1(Appl1)
APPL2	ENSMUSG00000020263	Mus musculus	adaptor protein, phosphotyrosine interaction, PH domain and leucine zipper containing 2(Appl2)
CLEC11A	ENSMUSG00000004473	Mus musculus	C-type lectin domain family 11, member a(Clec11a)
DOLK	ENSMUSG00000075419	Mus musculus	dolichol kinase(Dolk)
KCMF1	ENSMUSG00000055239	Mus musculus	potassium channel modulatory factor 1(Kcmf1)
DYM	ENSMUSG00000035765	Mus musculus	dymeclin(Dym)
ZMYND19	ENSMUSG00000026974	Mus musculus	zinc finger, MYND domain containing 19(Zmynd19)
CP	ENSMUSG00000003617	Mus musculus	ceruloplasmin(Cp)
SERPIND1	ENSMUSG00000022766	Mus musculus	serine (or cysteine) peptidase inhibitor, clade D, member 1(Serpind1)
SRP14	ENSMUSG00000009549	Mus musculus	signal recognition particle 14(Srp14)
SLC13A5	ENSMUSG00000020805	Mus musculus	solute carrier family 13 (sodium-dependent citrate transporter), member 5(Slc13a5)
PRC1	ENSMUSG00000038943	Mus musculus	protein regulator of cytokinesis 1(Prc1)
IDE	ENSMUSG00000056999	Mus musculus	insulin degrading enzyme(Ide)
NUP62CL	ENSMUSG00000072944	Mus musculus	nucleoporin 62 C-terminal like(Nup62cl)
TCEAL8	ENSMUSG00000051579	Mus musculus	transcription elongation factor A (SII)-like 8(Tceal8)
SRP19	ENSMUSG00000014504	Mus musculus	signal recognition particle 19(Srp19)
TCEAL1	ENSMUSG00000049536	Mus musculus	transcription elongation factor A (SII)-like 1(Tceal1)
IDS	ENSMUSG00000035847	Mus musculus	iduronate 2-sulfatase(Ids)
EED	ENSMUSG00000030619	Mus musculus	embryonic ectoderm development(Eed)
MTURN	ENSMUSG00000038065	Mus musculus	maturin, neural progenitor differentiation regulator homolog (Xenopus)(Mturn)
PMS2	ENSMUSG00000075569	Mus musculus	postmeiotic segregation increased 2 (S. cerevisiae)(Pms2)
PMS2	ENSMUSG00000079109	Mus musculus	postmeiotic segregation increased 2 (S. cerevisiae)(Pms2)
CIB2	ENSMUSG00000037493	Mus musculus	calcium and integrin binding family member 2(Cib2)
SLC8B1	ENSMUSG00000032754	Mus musculus	solute carrier family 8 (sodium/lithium/calcium exchanger), member B1(Slc8b1)
MTUS1	ENSMUSG00000045636	Mus musculus	mitochondrial tumor suppressor 1(Mtus1)
PMS1	ENSMUSG00000026098	Mus musculus	postmeiotic segregation increased 1 (S. cerevisiae)(Pms1)
MB	ENSMUSG00000018893	Mus musculus	myoglobin(Mb)
CIB1	ENSMUSG00000030538	Mus musculus	calcium and integrin binding 1 (calmyrin)(Cib1)
MCM3AP	ENSMUSG00000001150	Mus musculus	minichromosome maintenance complex component 3 associated protein(Mcm3ap)
BEND4	ENSMUSG00000092060	Mus musculus	BEN domain containing 4(Bend4)
BEND6	ENSMUSG00000042182	Mus musculus	BEN domain containing 6(Bend6)
GABPA	ENSMUSG00000008976	Mus musculus	GA repeat binding protein, alpha(Gabpa)
XRRA1	ENSMUSG00000035211	Mus musculus	X-ray radiation resistance associated 1(Xrra1)
ANKRD13A	ENSMUSG00000041870	Mus musculus	ankyrin repeat domain 13a(Ankrd13a)
ANKRD13D	ENSMUSG00000005986	Mus musculus	ankyrin repeat domain 13 family, member D(Ankrd13d)
ANKRD13C	ENSMUSG00000039988	Mus musculus	ankyrin repeat domain 13c(Ankrd13c)
ANKRD13B	ENSMUSG00000037907	Mus musculus	ankyrin repeat domain 13b(Ankrd13b)
VAMP8	ENSMUSG00000050732	Mus musculus	vesicle-associated membrane protein 8(Vamp8)
PRCC	ENSMUSG00000004895	Mus musculus	papillary renal cell carcinoma (translocation-associated)(Prcc)
VAMP5	ENSMUSG00000073002	Mus musculus	vesicle-associated membrane protein 5(Vamp5)
PRCP	ENSMUSG00000061119	Mus musculus	prolylcarboxypeptidase (angiotensinase C)(Prcp)
VAMP4	ENSMUSG00000026696	Mus musculus	vesicle-associated membrane protein 4(Vamp4)
VAMP3	ENSMUSG00000028955	Mus musculus	vesicle-associated membrane protein 3(Vamp3)
PDCD6IP	ENSMUSG00000032504	Mus musculus	programmed cell death 6 interacting protein(Pdcd6ip)
VAMP2	ENSMUSG00000020894	Mus musculus	vesicle-associated membrane protein 2(Vamp2)
VAMP1	ENSMUSG00000030337	Mus musculus	vesicle-associated membrane protein 1(Vamp1)
EDA	ENSMUSG00000059327	Mus musculus	ectodysplasin-A(Eda)
HIST1H4K	ENSMUSG00000064288	Mus musculus	histone cluster 1, H4k(Hist1h4k)
ORAOV1	ENSMUSG00000031072	Mus musculus	oral cancer overexpressed 1(Oraov1)
MEIS1	ENSMUSG00000020160	Mus musculus	Meis homeobox 1(Meis1)
KNOP1	ENSMUSG00000030980	Mus musculus	lysine rich nucleolar protein 1(Knop1)
COMMD10	ENSMUSG00000042705	Mus musculus	COMM domain containing 10(Commd10)
TASP1	ENSMUSG00000039033	Mus musculus	taspase, threonine aspartase 1(Tasp1)
MEIS3	ENSMUSG00000041420	Mus musculus	Meis homeobox 3(Meis3)
MEIS2	ENSMUSG00000027210	Mus musculus	Meis homeobox 2(Meis2)
HIST1H4A	ENSMUSG00000060093	Mus musculus	histone cluster 1, H4a(Hist1h4a)
HIST1H4B	ENSMUSG00000069266	Mus musculus	histone cluster 1, H4b(Hist1h4b)
SYAP1	ENSMUSG00000031357	Mus musculus	synapse associated protein 1(Syap1)
TEAD4	ENSMUSG00000030353	Mus musculus	TEA domain family member 4(Tead4)
SLC35F2	ENSMUSG00000042195	Mus musculus	solute carrier family 35, member F2(Slc35f2)
HIST1H4F	ENSMUSG00000069274	Mus musculus	histone cluster 1, H4f(Hist1h4f)
SLC35F3	ENSMUSG00000057060	Mus musculus	solute carrier family 35, member F3(Slc35f3)
HIST1H4C	ENSMUSG00000060678	Mus musculus	histone cluster 1, H4c(Hist1h4c)
SLC35F4	ENSMUSG00000021852	Mus musculus	solute carrier family 35, member F4(Slc35f4)
HIST1H4D	ENSMUSG00000061482	Mus musculus	histone cluster 1, H4d(Hist1h4d)
RPL10A	ENSMUSG00000037805	Mus musculus	ribosomal protein L10A(Rpl10a)
SLC35F5	ENSMUSG00000026342	Mus musculus	solute carrier family 35, member F5(Slc35f5)
PALB2	ENSMUSG00000044702	Mus musculus	partner and localizer of BRCA2(Palb2)
HIST1H4I	ENSMUSG00000060639	Mus musculus	histone cluster 1, H4i(Hist1h4i)
SLC35F6	ENSMUSG00000029175	Mus musculus	solute carrier family 35, member F6(Slc35f6)
HIST1H4J	ENSMUSG00000067455	Mus musculus	histone cluster 1, H4j(Hist1h4j)
HIST1H4H	ENSMUSG00000060981	Mus musculus	histone cluster 1, H4h(Hist1h4h)
ARL14EP	ENSMUSG00000027122	Mus musculus	ADP-ribosylation factor-like 14 effector protein(Arl14ep)
RAB8A	ENSMUSG00000003037	Mus musculus	RAB8A, member RAS oncogene family(Rab8a)
RAB8B	ENSMUSG00000036943	Mus musculus	RAB8B, member RAS oncogene family(Rab8b)
TEAD1	ENSMUSG00000055320	Mus musculus	TEA domain family member 1(Tead1)
TEAD2	ENSMUSG00000030796	Mus musculus	TEA domain family member 2(Tead2)
TEAD3	ENSMUSG00000002249	Mus musculus	TEA domain family member 3(Tead3)
P4HTM	ENSMUSG00000006675	Mus musculus	prolyl 4-hydroxylase, transmembrane (endoplasmic reticulum)(P4htm)
SLC35G1	ENSMUSG00000044026	Mus musculus	solute carrier family 35, member G1(Slc35g1)
SLC35G2	ENSMUSG00000070287	Mus musculus	solute carrier family 35, member G2(Slc35g2)
DOHH	ENSMUSG00000078440	Mus musculus	deoxyhypusine hydroxylase/monooxygenase(Dohh)
HIST1H3A	ENSMUSG00000069265	Mus musculus	histone cluster 1, H3a(Hist1h3a)
HIST1H3B	ENSMUSG00000069267	Mus musculus	histone cluster 1, H3b(Hist1h3b)
HIST1H3C	ENSMUSG00000069310	Mus musculus	histone cluster 1, H3c(Hist1h3c)
SLC13A2	ENSMUSG00000001095	Mus musculus	solute carrier family 13 (sodium-dependent dicarboxylate transporter), member 2(Slc13a2)
HIST1H3D	ENSMUSG00000099583	Mus musculus	histone cluster 1, H3d(Hist1h3d)
HIST1H3E	ENSMUSG00000069273	Mus musculus	histone cluster 1, H3e(Hist1h3e)
SLC13A4	ENSMUSG00000029843	Mus musculus	solute carrier family 13 (sodium/sulfate symporters), member 4(Slc13a4)
ABL1	ENSMUSG00000026842	Mus musculus	c-abl oncogene 1, non-receptor tyrosine kinase(Abl1)
HIST1H3F	ENSMUSG00000100210	Mus musculus	histone cluster 1, H3f(Hist1h3f)
HIST1H3G	ENSMUSG00000099517	Mus musculus	histone cluster 1, H3g(Hist1h3g)
SLC5A11	ENSMUSG00000030769	Mus musculus	solute carrier family 5 (sodium/glucose cotransporter), member 11(Slc5a11)
HIST1H3H	ENSMUSG00000101355	Mus musculus	histone cluster 1, H3h(Hist1h3h)
HIST1H3I	ENSMUSG00000101972	Mus musculus	histone cluster 1, H3i(Hist1h3i)
KIF23	ENSMUSG00000032254	Mus musculus	kinesin family member 23(Kif23)
KIF22	ENSMUSG00000030677	Mus musculus	kinesin family member 22(Kif22)
KIF24	ENSMUSG00000028438	Mus musculus	kinesin family member 24(Kif24)
PODNL1	ENSMUSG00000012889	Mus musculus	podocan-like 1(Podnl1)
KIF27	ENSMUSG00000060176	Mus musculus	kinesin family member 27(Kif27)
HR	ENSMUSG00000022096	Mus musculus	hairless(Hr)
HP	ENSMUSG00000031722	Mus musculus	haptoglobin(Hp)
ACOT9	ENSMUSG00000025287	Mus musculus	acyl-CoA thioesterase 9(Acot9)
KIF2C	ENSMUSG00000028678	Mus musculus	kinesin family member 2C(Kif2c)
ACOT8	ENSMUSG00000017307	Mus musculus	acyl-CoA thioesterase 8(Acot8)
SLC35D1	ENSMUSG00000028521	Mus musculus	solute carrier family 35 (UDP-glucuronic acid/UDP-N-acetylgalactosamine dual transporter), member D1(Slc35d1)
DKC1	ENSMUSG00000031403	Mus musculus	dyskeratosis congenita 1, dyskerin(Dkc1)
LACE1	ENSMUSG00000038302	Mus musculus	lactation elevated 1(Lace1)
PSMC3IP	ENSMUSG00000019303	Mus musculus	proteasome (prosome, macropain) 26S subunit, ATPase 3, interacting protein(Psmc3ip)
SLC35D2	ENSMUSG00000033114	Mus musculus	solute carrier family 35, member D2(Slc35d2)
KIF2A	ENSMUSG00000021693	Mus musculus	kinesin family member 2A(Kif2a)
PPP2R1B	ENSMUSG00000032058	Mus musculus	protein phosphatase 2, regulatory subunit A, beta(Ppp2r1b)
SPECC1L	ENSMUSG00000033444	Mus musculus	sperm antigen with calponin homology and coiled-coil domains 1-like(Specc1l)
KIF14	ENSMUSG00000041498	Mus musculus	kinesin family member 14(Kif14)
EPN3	ENSMUSG00000010080	Mus musculus	epsin 3(Epn3)
PPP2R1A	ENSMUSG00000007564	Mus musculus	protein phosphatase 2, regulatory subunit A, alpha(Ppp2r1a)
KIF12	ENSMUSG00000028357	Mus musculus	kinesin family member 12(Kif12)
IK	ENSMUSG00000024474	Mus musculus	IK cytokine(Ik)
KIF11	ENSMUSG00000012443	Mus musculus	kinesin family member 11(Kif11)
KIF15	ENSMUSG00000036768	Mus musculus	kinesin family member 15(Kif15)
MEIOB	ENSMUSG00000024155	Mus musculus	meiosis specific with OB domains(Meiob)
ERAL1	ENSMUSG00000020832	Mus musculus	Era (G-protein)-like 1 (E. coli)(Eral1)
PMM2	ENSMUSG00000022711	Mus musculus	phosphomannomutase 2(Pmm2)
PMM1	ENSMUSG00000022474	Mus musculus	phosphomannomutase 1(Pmm1)
KIF1C	ENSMUSG00000020821	Mus musculus	kinesin family member 1C(Kif1c)
KIF1B	ENSMUSG00000063077	Mus musculus	kinesin family member 1B(Kif1b)
SLC35E4	ENSMUSG00000048807	Mus musculus	solute carrier family 35, member E4(Slc35e4)
SLC35E3	ENSMUSG00000060181	Mus musculus	solute carrier family 35, member E3(Slc35e3)
SLC35E2	ENSMUSG00000042202	Mus musculus	solute carrier family 35, member E2(Slc35e2)
SLC35E1	ENSMUSG00000019731	Mus musculus	solute carrier family 35, member E1(Slc35e1)
SPEF2	ENSMUSG00000072663	Mus musculus	sperm flagellar 2(Spef2)
EPN1	ENSMUSG00000035203	Mus musculus	epsin 1(Epn1)
SPEF1	ENSMUSG00000027329	Mus musculus	sperm flagellar 1(Spef1)
PPP2R2A	ENSMUSG00000022052	Mus musculus	protein phosphatase 2, regulatory subunit B, alpha(Ppp2r2a)
FKBP2	ENSMUSG00000056629	Mus musculus	FK506 binding protein 2(Fkbp2)
EPN2	ENSMUSG00000001036	Mus musculus	epsin 2(Epn2)
FKBP9	ENSMUSG00000029781	Mus musculus	FK506 binding protein 9(Fkbp9)
FKBP8	ENSMUSG00000019428	Mus musculus	FK506 binding protein 8(Fkbp8)
FKBP7	ENSMUSG00000002732	Mus musculus	FK506 binding protein 7(Fkbp7)
MYDGF	ENSMUSG00000019579	Mus musculus	myeloid derived growth factor(Mydgf)
FKBP5	ENSMUSG00000024222	Mus musculus	FK506 binding protein 5(Fkbp5)
CRLF3	ENSMUSG00000017561	Mus musculus	cytokine receptor-like factor 3(Crlf3)
CRLF2	ENSMUSG00000033467	Mus musculus	cytokine receptor-like factor 2(Crlf2)
ETHE1	ENSMUSG00000064254	Mus musculus	ethylmalonic encephalopathy 1(Ethe1)
FKBP4	ENSMUSG00000030357	Mus musculus	FK506 binding protein 4(Fkbp4)
FKBP3	ENSMUSG00000020949	Mus musculus	FK506 binding protein 3(Fkbp3)
SLC35A5	ENSMUSG00000022664	Mus musculus	solute carrier family 35, member A5(Slc35a5)
STUB1	ENSMUSG00000039615	Mus musculus	STIP1 homology and U-Box containing protein 1(Stub1)
FAM13B	ENSMUSG00000036501	Mus musculus	family with sequence similarity 13, member B(Fam13b)
PAIP2B	ENSMUSG00000045896	Mus musculus	poly(A) binding protein interacting protein 2B(Paip2b)
SLC35B1	ENSMUSG00000020873	Mus musculus	solute carrier family 35, member B1(Slc35b1)
SLC35B3	ENSMUSG00000021432	Mus musculus	solute carrier family 35, member B3(Slc35b3)
SLC35B2	ENSMUSG00000037089	Mus musculus	solute carrier family 35, member B2(Slc35b2)
COL27A1	ENSMUSG00000045672	Mus musculus	collagen, type XXVII, alpha 1(Col27a1)
SLC35B4	ENSMUSG00000018999	Mus musculus	solute carrier family 35, member B4(Slc35b4)
LACC1	ENSMUSG00000044350	Mus musculus	laccase (multicopper oxidoreductase) domain containing 1(Lacc1)
ECD	ENSMUSG00000021810	Mus musculus	ecdysoneless homolog (Drosophila)(Ecd)
GTF3C6	ENSMUSG00000019837	Mus musculus	general transcription factor IIIC, polypeptide 6, alpha(Gtf3c6)
GTF3C5	ENSMUSG00000026816	Mus musculus	general transcription factor IIIC, polypeptide 5(Gtf3c5)
GTF3C2	ENSMUSG00000101678	Mus musculus	general transcription factor IIIC, polypeptide 2, beta(Gtf3c2)
GTF3C2	ENSMUSG00000106864	Mus musculus	general transcription factor IIIC, polypeptide 2, beta(Gtf3c2)
GTF3C1	ENSMUSG00000032777	Mus musculus	general transcription factor III C 1(Gtf3c1)
GTF3C4	ENSMUSG00000035666	Mus musculus	general transcription factor IIIC, polypeptide 4(Gtf3c4)
GTF3C3	ENSMUSG00000041303	Mus musculus	general transcription factor IIIC, polypeptide 3(Gtf3c3)
FKBPL	ENSMUSG00000033739	Mus musculus	FK506 binding protein-like(Fkbpl)
EBP	ENSMUSG00000031168	Mus musculus	phenylalkylamine Ca2+ antagonist (emopamil) binding protein(Ebp)
OLR1	ENSMUSG00000030162	Mus musculus	oxidized low density lipoprotein (lectin-like) receptor 1(Olr1)
XPNPEP3	ENSMUSG00000022401	Mus musculus	X-prolyl aminopeptidase 3, mitochondrial(Xpnpep3)
XPNPEP1	ENSMUSG00000025027	Mus musculus	X-prolyl aminopeptidase (aminopeptidase P) 1, soluble(Xpnpep1)
SLC35C2	ENSMUSG00000017664	Mus musculus	solute carrier family 35, member C2(Slc35c2)
SLC35C1	ENSMUSG00000049922	Mus musculus	solute carrier family 35, member C1(Slc35c1)
ICK	ENSMUSG00000009828	Mus musculus	intestinal cell kinase(Ick)
ID2	ENSMUSG00000020644	Mus musculus	inhibitor of DNA binding 2(Id2)
ID1	ENSMUSG00000042745	Mus musculus	inhibitor of DNA binding 1(Id1)
RPL13A	ENSMUSG00000074129	Mus musculus	ribosomal protein L13A(Rpl13a)
ID4	ENSMUSG00000021379	Mus musculus	inhibitor of DNA binding 4(Id4)
EPOR	ENSMUSG00000006235	Mus musculus	erythropoietin receptor(Epor)
ID3	ENSMUSG00000007872	Mus musculus	inhibitor of DNA binding 3(Id3)
RPP38	ENSMUSG00000049950	Mus musculus	ribonuclease P/MRP 38 subunit(Rpp38)
TARS2	ENSMUSG00000028107	Mus musculus	threonyl-tRNA synthetase 2, mitochondrial (putative)(Tars2)
PNKD	ENSMUSG00000026179	Mus musculus	paroxysmal nonkinesiogenic dyskinesia(Pnkd)
DYNC2LI1	ENSMUSG00000024253	Mus musculus	dynein cytoplasmic 2 light intermediate chain 1(Dync2li1)
TRAPPC2L	ENSMUSG00000015013	Mus musculus	trafficking protein particle complex 2-like(Trappc2l)
RAB1B	ENSMUSG00000024870	Mus musculus	RAB1B, member RAS oncogene family(Rab1b)
SZT2	ENSMUSG00000033253	Mus musculus	seizure threshold 2(Szt2)
SLC35A1	ENSMUSG00000028293	Mus musculus	solute carrier family 35 (CMP-sialic acid transporter), member 1(Slc35a1)
SLC35A2	ENSMUSG00000031156	Mus musculus	solute carrier family 35 (UDP-galactose transporter), member A2(Slc35a2)
RAB1A	ENSMUSG00000020149	Mus musculus	RAB1A, member RAS oncogene family(Rab1a)
SLC35A3	ENSMUSG00000027957	Mus musculus	solute carrier family 35 (UDP-N-acetylglucosamine (UDP-GlcNAc) transporter), member 3(Slc35a3)
PRKX	ENSMUSG00000035725	Mus musculus	protein kinase, X-linked(Prkx)
SLC35A4	ENSMUSG00000033272	Mus musculus	solute carrier family 35, member A4(Slc35a4)
G2E3	ENSMUSG00000035293	Mus musculus	G2/M-phase specific E3 ubiquitin ligase(G2e3)
MYD88	ENSMUSG00000032508	Mus musculus	myeloid differentiation primary response gene 88(Myd88)
VPS13C	ENSMUSG00000035284	Mus musculus	vacuolar protein sorting 13C(Vps13c)
ATXN10	ENSMUSG00000016541	Mus musculus	ataxin 10(Atxn10)
VPS13D	ENSMUSG00000020220	Mus musculus	vacuolar protein sorting 13D(Vps13d)
RAB28	ENSMUSG00000029128	Mus musculus	RAB28, member RAS oncogene family(Rab28)
RAB29	ENSMUSG00000026433	Mus musculus	RAB29, member RAS oncogene family(Rab29)
RAB23	ENSMUSG00000004768	Mus musculus	RAB23, member RAS oncogene family(Rab23)
RAB24	ENSMUSG00000034789	Mus musculus	RAB24, member RAS oncogene family(Rab24)
ERAP1	ENSMUSG00000021583	Mus musculus	endoplasmic reticulum aminopeptidase 1(Erap1)
RPP30	ENSMUSG00000024800	Mus musculus	ribonuclease P/MRP 30 subunit(Rpp30)
RAB25	ENSMUSG00000008601	Mus musculus	RAB25, member RAS oncogene family(Rab25)
VPS13A	ENSMUSG00000046230	Mus musculus	vacuolar protein sorting 13A(Vps13a)
RAB26	ENSMUSG00000079657	Mus musculus	RAB26, member RAS oncogene family(Rab26)
VPS13B	ENSMUSG00000037646	Mus musculus	vacuolar protein sorting 13B(Vps13b)
NSMAF	ENSMUSG00000028245	Mus musculus	neutral sphingomyelinase (N-SMase) activation associated factor(Nsmaf)
RAB20	ENSMUSG00000031504	Mus musculus	RAB20, member RAS oncogene family(Rab20)
RAB21	ENSMUSG00000020132	Mus musculus	RAB21, member RAS oncogene family(Rab21)
RPP25	ENSMUSG00000062309	Mus musculus	ribonuclease P/MRP 25 subunit(Rpp25)
F11R	ENSMUSG00000038235	Mus musculus	F11 receptor(F11r)
RRP7A	ENSMUSG00000018040	Mus musculus	ribosomal RNA processing 7 homolog A (S. cerevisiae)(Rrp7a)
TMEM200B	ENSMUSG00000070720	Mus musculus	transmembrane protein 200B(Tmem200b)
NKTR	ENSMUSG00000032525	Mus musculus	natural killer tumor recognition sequence(Nktr)
TRAPPC12	ENSMUSG00000020628	Mus musculus	trafficking protein particle complex 12(Trappc12)
TRAPPC11	ENSMUSG00000038102	Mus musculus	trafficking protein particle complex 11(Trappc11)
PNKP	ENSMUSG00000002963	Mus musculus	polynucleotide kinase 3'- phosphatase(Pnkp)
LETM1	ENSMUSG00000005299	Mus musculus	leucine zipper-EF-hand containing transmembrane protein 1(Letm1)
TRAPPC13	ENSMUSG00000021711	Mus musculus	trafficking protein particle complex 13(Trappc13)
RAB18	ENSMUSG00000073639	Mus musculus	RAB18, member RAS oncogene family(Rab18)
ABT1	ENSMUSG00000036376	Mus musculus	activator of basal transcription 1(Abt1)
RAB17	ENSMUSG00000026304	Mus musculus	RAB17, member RAS oncogene family(Rab17)
PEX26	ENSMUSG00000067825	Mus musculus	peroxisomal biogenesis factor 26(Pex26)
DLD	ENSMUSG00000020664	Mus musculus	dihydrolipoamide dehydrogenase(Dld)
RAB14	ENSMUSG00000026878	Mus musculus	RAB14, member RAS oncogene family(Rab14)
RAB12	ENSMUSG00000023460	Mus musculus	RAB12, member RAS oncogene family(Rab12)
ATXN1L	ENSMUSG00000069895	Mus musculus	ataxin 1-like(Atxn1l)
RAB10	ENSMUSG00000020671	Mus musculus	RAB10, member RAS oncogene family(Rab10)
PLA2G2E	ENSMUSG00000028751	Mus musculus	phospholipase A2, group IIE(Pla2g2e)
CHGB	ENSMUSG00000027350	Mus musculus	chromogranin B(Chgb)
MYH7B	ENSMUSG00000074652	Mus musculus	myosin, heavy chain 7B, cardiac muscle, beta(Myh7b)
FAM172A	ENSMUSG00000064138	Mus musculus	family with sequence similarity 172, member A(Fam172a)
COASY	ENSMUSG00000001755	Mus musculus	Coenzyme A synthase(Coasy)
CHKA	ENSMUSG00000024843	Mus musculus	choline kinase alpha(Chka)
MFNG	ENSMUSG00000018169	Mus musculus	MFNG O-fucosylpeptide 3-beta-N-acetylglucosaminyltransferase(Mfng)
STK11IP	ENSMUSG00000026213	Mus musculus	serine/threonine kinase 11 interacting protein(Stk11ip)
IFI30	ENSMUSG00000031838	Mus musculus	interferon gamma inducible protein 30(Ifi30)
XK	ENSMUSG00000015342	Mus musculus	X-linked Kx blood group(Xk)
LETM2	ENSMUSG00000037363	Mus musculus	leucine zipper-EF-hand containing transmembrane protein 2(Letm2)
ANGEL2	ENSMUSG00000026634	Mus musculus	angel homolog 2 (Drosophila)(Angel2)
ANGEL1	ENSMUSG00000021257	Mus musculus	angel homolog 1 (Drosophila)(Angel1)
IFI35	ENSMUSG00000010358	Mus musculus	interferon-induced protein 35(Ifi35)
F13B	ENSMUSG00000026368	Mus musculus	coagulation factor XIII, beta subunit(F13b)
NGRN	ENSMUSG00000047084	Mus musculus	neugrin, neurite outgrowth associated(Ngrn)
TMED10	ENSMUSG00000021248	Mus musculus	transmembrane p24 trafficking protein 10(Tmed10)
BCOR	ENSMUSG00000040363	Mus musculus	BCL6 interacting corepressor(Bcor)
NKRF	ENSMUSG00000044149	Mus musculus	NF-kappaB repressing factor(Nkrf)
RHBDF2	ENSMUSG00000020806	Mus musculus	rhomboid 5 homolog 2(Rhbdf2)
MSTO1	ENSMUSG00000068922	Mus musculus	misato 1, mitochondrial distribution and morphology regulator(Msto1)
UAP1L1	ENSMUSG00000026956	Mus musculus	UDP-N-acteylglucosamine pyrophosphorylase 1-like 1(Uap1l1)
AAED1	ENSMUSG00000021482	Mus musculus	AhpC/TSA antioxidant enzyme domain containing 1(Aaed1)
PLA2G4A	ENSMUSG00000056220	Mus musculus	phospholipase A2, group IVA (cytosolic, calcium-dependent)(Pla2g4a)
RPL18A	ENSMUSG00000045128	Mus musculus	ribosomal protein L18A(Rpl18a)
NTRK1	ENSMUSG00000028072	Mus musculus	neurotrophic tyrosine kinase, receptor, type 1(Ntrk1)
GRK6	ENSMUSG00000074886	Mus musculus	G protein-coupled receptor kinase 6(Grk6)
GRK4	ENSMUSG00000052783	Mus musculus	G protein-coupled receptor kinase 4(Grk4)
PLA2G4C	ENSMUSG00000033847	Mus musculus	phospholipase A2, group IVC (cytosolic, calcium-independent)(Pla2g4c)
ALG11	ENSMUSG00000063362	Mus musculus	asparagine-linked glycosylation 11 (alpha-1,2-mannosyltransferase)(Alg11)
ALG12	ENSMUSG00000035845	Mus musculus	asparagine-linked glycosylation 12 (alpha-1,6-mannosyltransferase)(Alg12)
ALG13	ENSMUSG00000041718	Mus musculus	asparagine-linked glycosylation 13(Alg13)
BCO2	ENSMUSG00000032066	Mus musculus	beta-carotene oxygenase 2(Bco2)
RPP40	ENSMUSG00000021418	Mus musculus	ribonuclease P 40 subunit(Rpp40)
ALG14	ENSMUSG00000039887	Mus musculus	asparagine-linked glycosylation 14(Alg14)
TCEANC	ENSMUSG00000051224	Mus musculus	transcription elongation factor A (SII) N-terminal and central domain containing(Tceanc)
RAB5B	ENSMUSG00000000711	Mus musculus	RAB5B, member RAS oncogene family(Rab5b)
RAB5C	ENSMUSG00000019173	Mus musculus	RAB5C, member RAS oncogene family(Rab5c)
TOLLIP	ENSMUSG00000025139	Mus musculus	toll interacting protein(Tollip)
VBP1	ENSMUSG00000031197	Mus musculus	von Hippel-Lindau binding protein 1(Vbp1)
TTLL4	ENSMUSG00000033257	Mus musculus	tubulin tyrosine ligase-like family, member 4(Ttll4)
SHOC2	ENSMUSG00000024976	Mus musculus	soc-2 (suppressor of clear) homolog (C. elegans)(Shoc2)
TTLL5	ENSMUSG00000012609	Mus musculus	tubulin tyrosine ligase-like family, member 5(Ttll5)
TTLL6	ENSMUSG00000038756	Mus musculus	tubulin tyrosine ligase-like family, member 6(Ttll6)
TTLL7	ENSMUSG00000036745	Mus musculus	tubulin tyrosine ligase-like family, member 7(Ttll7)
TAS1R1	ENSMUSG00000028950	Mus musculus	taste receptor, type 1, member 1(Tas1r1)
TTLL1	ENSMUSG00000022442	Mus musculus	tubulin tyrosine ligase-like 1(Ttll1)
TTLL3	ENSMUSG00000030276	Mus musculus	tubulin tyrosine ligase-like family, member 3(Ttll3)
HSPH1	ENSMUSG00000029657	Mus musculus	heat shock 105kDa/110kDa protein 1(Hsph1)
TRAPPC6A	ENSMUSG00000002043	Mus musculus	trafficking protein particle complex 6A(Trappc6a)
MCCC2	ENSMUSG00000021646	Mus musculus	methylcrotonoyl-Coenzyme A carboxylase 2 (beta)(Mccc2)
GOLGA7	ENSMUSG00000015341	Mus musculus	golgi autoantigen, golgin subfamily a, 7(Golga7)
LONP1	ENSMUSG00000041168	Mus musculus	lon peptidase 1, mitochondrial(Lonp1)
AGPAT5	ENSMUSG00000031467	Mus musculus	1-acylglycerol-3-phosphate O-acyltransferase 5 (lysophosphatidic acid acyltransferase, epsilon)(Agpat5)
LONP2	ENSMUSG00000047866	Mus musculus	lon peptidase 2, peroxisomal(Lonp2)
RRP1B	ENSMUSG00000058392	Mus musculus	ribosomal RNA processing 1 homolog B (S. cerevisiae)(Rrp1b)
SEH1L	ENSMUSG00000079614	Mus musculus	SEH1-like (S. cerevisiae(Seh1l)
MCCC1	ENSMUSG00000027709	Mus musculus	methylcrotonoyl-Coenzyme A carboxylase 1 (alpha)(Mccc1)
TRAPPC6B	ENSMUSG00000020993	Mus musculus	trafficking protein particle complex 6B(Trappc6b)
AGPAT9	ENSMUSG00000029314	Mus musculus	1-acylglycerol-3-phosphate O-acyltransferase 9(Agpat9)
GOLGA1	ENSMUSG00000026754	Mus musculus	golgi autoantigen, golgin subfamily a, 1(Golga1)
OARD1	ENSMUSG00000040771	Mus musculus	O-acyl-ADP-ribose deacylase 1(Oard1)
RAB6B	ENSMUSG00000032549	Mus musculus	RAB6B, member RAS oncogene family(Rab6b)
RAB6A	ENSMUSG00000030704	Mus musculus	RAB6A, member RAS oncogene family(Rab6a)
GOLGA5	ENSMUSG00000021192	Mus musculus	golgi autoantigen, golgin subfamily a, 5(Golga5)
AGPAT4	ENSMUSG00000023827	Mus musculus	1-acylglycerol-3-phosphate O-acyltransferase 4 (lysophosphatidic acid acyltransferase, delta)(Agpat4)
GOLGA4	ENSMUSG00000038708	Mus musculus	golgi autoantigen, golgin subfamily a, 4(Golga4)
AGPAT3	ENSMUSG00000001211	Mus musculus	1-acylglycerol-3-phosphate O-acyltransferase 3(Agpat3)
GOLGA3	ENSMUSG00000029502	Mus musculus	golgi autoantigen, golgin subfamily a, 3(Golga3)
AGPAT2	ENSMUSG00000026922	Mus musculus	1-acylglycerol-3-phosphate O-acyltransferase 2 (lysophosphatidic acid acyltransferase, beta)(Agpat2)
GOLGA2	ENSMUSG00000002546	Mus musculus	golgi autoantigen, golgin subfamily a, 2(Golga2)
AGPAT1	ENSMUSG00000034254	Mus musculus	1-acylglycerol-3-phosphate O-acyltransferase 1 (lysophosphatidic acid acyltransferase, alpha)(Agpat1)
RBBP5	ENSMUSG00000026439	Mus musculus	retinoblastoma binding protein 5(Rbbp5)
RBBP4	ENSMUSG00000057236	Mus musculus	retinoblastoma binding protein 4(Rbbp4)
PALD1	ENSMUSG00000020092	Mus musculus	phosphatase domain containing, paladin 1(Pald1)
RRP36	ENSMUSG00000023971	Mus musculus	ribosomal RNA processing 36 homolog (S. cerevisiae)(Rrp36)
RAB4A	ENSMUSG00000019478	Mus musculus	RAB4A, member RAS oncogene family(Rab4a)
RAB4B	ENSMUSG00000053291	Mus musculus	RAB4B, member RAS oncogene family(Rab4b)
MBD6	ENSMUSG00000025409	Mus musculus	methyl-CpG binding domain protein 6(Mbd6)
MBD5	ENSMUSG00000036792	Mus musculus	methyl-CpG binding domain protein 5(Mbd5)
MBD4	ENSMUSG00000030322	Mus musculus	methyl-CpG binding domain protein 4(Mbd4)
MBD3	ENSMUSG00000035478	Mus musculus	methyl-CpG binding domain protein 3(Mbd3)
RHBDD1	ENSMUSG00000026142	Mus musculus	rhomboid domain containing 1(Rhbdd1)
RBBP7	ENSMUSG00000031353	Mus musculus	retinoblastoma binding protein 7(Rbbp7)
MBD2	ENSMUSG00000024513	Mus musculus	methyl-CpG binding domain protein 2(Mbd2)
MBD1	ENSMUSG00000024561	Mus musculus	methyl-CpG binding domain protein 1(Mbd1)
RBBP6	ENSMUSG00000030779	Mus musculus	retinoblastoma binding protein 6(Rbbp6)
RBBP9	ENSMUSG00000027428	Mus musculus	retinoblastoma binding protein 9(Rbbp9)
RHBDD3	ENSMUSG00000034175	Mus musculus	rhomboid domain containing 3(Rhbdd3)
RBBP8	ENSMUSG00000041238	Mus musculus	retinoblastoma binding protein 8(Rbbp8)
RHBDD2	ENSMUSG00000039917	Mus musculus	rhomboid domain containing 2(Rhbdd2)
GRM4	ENSMUSG00000063239	Mus musculus	glutamate receptor, metabotropic 4(Grm4)
WDR83OS	ENSMUSG00000059355	Mus musculus	WD repeat domain 83 opposite strand(Wdr83os)
G6PC	ENSMUSG00000078650	Mus musculus	glucose-6-phosphatase, catalytic(G6pc)
GRM2	ENSMUSG00000023192	Mus musculus	glutamate receptor, metabotropic 2(Grm2)
GRM8	ENSMUSG00000024211	Mus musculus	glutamate receptor, metabotropic 8(Grm8)
RAB5A	ENSMUSG00000017831	Mus musculus	RAB5A, member RAS oncogene family(Rab5a)
RASSF10	ENSMUSG00000098132	Mus musculus	Ras association (RalGDS/AF-6) domain family (N-terminal) member 10(Rassf10)
RAB3A	ENSMUSG00000031840	Mus musculus	RAB3A, member RAS oncogene family(Rab3a)
RAB3B	ENSMUSG00000003411	Mus musculus	RAB3B, member RAS oncogene family(Rab3b)
RAB3D	ENSMUSG00000019066	Mus musculus	RAB3D, member RAS oncogene family(Rab3d)
FUT8	ENSMUSG00000021065	Mus musculus	fucosyltransferase 8(Fut8)
RPP14	ENSMUSG00000023156	Mus musculus	ribonuclease P 14 subunit(Rpp14)
RAB42	ENSMUSG00000089687	Mus musculus	RAB42, member RAS oncogene family(Rab42)
PLIN5	ENSMUSG00000011305	Mus musculus	perilipin 5(Plin5)
ATXN2L	ENSMUSG00000032637	Mus musculus	ataxin 2-like(Atxn2l)
RAB43	ENSMUSG00000030055	Mus musculus	RAB43, member RAS oncogene family(Rab43)
PLIN2	ENSMUSG00000028494	Mus musculus	perilipin 2(Plin2)
PEX19	ENSMUSG00000003464	Mus musculus	peroxisomal biogenesis factor 19(Pex19)
PGBD1	ENSMUSG00000055313	Mus musculus	piggyBac transposable element derived 1(Pgbd1)
PLIN1	ENSMUSG00000030546	Mus musculus	perilipin 1(Plin1)
BCL2	ENSMUSG00000057329	Mus musculus	B cell leukemia/lymphoma 2(Bcl2)
PEX16	ENSMUSG00000027222	Mus musculus	peroxisomal biogenesis factor 16(Pex16)
PLIN3	ENSMUSG00000024197	Mus musculus	perilipin 3(Plin3)
BCL3	ENSMUSG00000053175	Mus musculus	B cell leukemia/lymphoma 3(Bcl3)
FUT4	ENSMUSG00000049307	Mus musculus	fucosyltransferase 4(Fut4)
PEX14	ENSMUSG00000028975	Mus musculus	peroxisomal biogenesis factor 14(Pex14)
BCL6	ENSMUSG00000022508	Mus musculus	B cell leukemia/lymphoma 6(Bcl6)
PEX13	ENSMUSG00000020283	Mus musculus	peroxisomal biogenesis factor 13(Pex13)
PEX12	ENSMUSG00000018733	Mus musculus	peroxisomal biogenesis factor 12(Pex12)
FUT2	ENSMUSG00000055978	Mus musculus	fucosyltransferase 2(Fut2)
PEX10	ENSMUSG00000029047	Mus musculus	peroxisomal biogenesis factor 10(Pex10)
BCL9	ENSMUSG00000038256	Mus musculus	B cell CLL/lymphoma 9(Bcl9)
RAB2A	ENSMUSG00000047187	Mus musculus	RAB2A, member RAS oncogene family(Rab2a)
RAB2B	ENSMUSG00000022159	Mus musculus	RAB2B, member RAS oncogene family(Rab2b)
PLA2G16	ENSMUSG00000060675	Mus musculus	phospholipase A2, group XVI(Pla2g16)
RRP12	ENSMUSG00000035049	Mus musculus	ribosomal RNA processing 12 homolog (S. cerevisiae)(Rrp12)
PLA2G15	ENSMUSG00000031903	Mus musculus	phospholipase A2, group XV(Pla2g15)
PLA2G10	ENSMUSG00000022683	Mus musculus	phospholipase A2, group X(Pla2g10)
RRP15	ENSMUSG00000001305	Mus musculus	ribosomal RNA processing 15 homolog (S. cerevisiae)(Rrp15)
HSPG2	ENSMUSG00000028763	Mus musculus	perlecan (heparan sulfate proteoglycan 2)(Hspg2)
HYI	ENSMUSG00000006395	Mus musculus	hydroxypyruvate isomerase (putative)(Hyi)
PREB	ENSMUSG00000045302	Mus musculus	prolactin regulatory element binding(Preb)
RAB30	ENSMUSG00000030643	Mus musculus	RAB30, member RAS oncogene family(Rab30)
RAB37	ENSMUSG00000020732	Mus musculus	RAB37, member RAS oncogene family(Rab37)
TOM1L1	ENSMUSG00000020541	Mus musculus	target of myb1-like 1 (chicken)(Tom1l1)
RAB36	ENSMUSG00000020175	Mus musculus	RAB36, member RAS oncogene family(Rab36)
TOM1L2	ENSMUSG00000000538	Mus musculus	target of myb1-like 2 (chicken)(Tom1l2)
MBOAT7	ENSMUSG00000035596	Mus musculus	membrane bound O-acyltransferase domain containing 7(Mboat7)
SVIL	ENSMUSG00000024236	Mus musculus	supervillin(Svil)
RAB35	ENSMUSG00000029518	Mus musculus	RAB35, member RAS oncogene family(Rab35)
RAB34	ENSMUSG00000002059	Mus musculus	RAB34, member RAS oncogene family(Rab34)
CHN1	ENSMUSG00000056486	Mus musculus	chimerin 1(Chn1)
MBOAT1	ENSMUSG00000038732	Mus musculus	membrane bound O-acyltransferase domain containing 1(Mboat1)
MBOAT2	ENSMUSG00000020646	Mus musculus	membrane bound O-acyltransferase domain containing 2(Mboat2)
SVIP	ENSMUSG00000074093	Mus musculus	small VCP/p97-interacting protein(Svip)
RAB38	ENSMUSG00000030559	Mus musculus	RAB38, member RAS oncogene family(Rab38)
GOLGB1	ENSMUSG00000034243	Mus musculus	golgi autoantigen, golgin subfamily b, macrogolgin 1(Golgb1)
BCDIN3D	ENSMUSG00000037525	Mus musculus	BCDIN3 domain containing(Bcdin3d)
EIF5B	ENSMUSG00000026083	Mus musculus	eukaryotic translation initiation factor 5B(Eif5b)
FAM179B	ENSMUSG00000035614	Mus musculus	family with sequence similarity 179, member B(Fam179b)
EIF5A	ENSMUSG00000078812	Mus musculus	eukaryotic translation initiation factor 5A(Eif5a)
MBIP	ENSMUSG00000021028	Mus musculus	MAP3K12 binding inhibitory protein 1(Mbip)
DSE	ENSMUSG00000039497	Mus musculus	dermatan sulfate epimerase(Dse)
CACTIN	ENSMUSG00000034889	Mus musculus	cactin, spliceosome C complex subunit(Cactin)
MS4A1	ENSMUSG00000024673	Mus musculus	membrane-spanning 4-domains, subfamily A, member 1(Ms4a1)
GLTPD2	ENSMUSG00000046811	Mus musculus	glycolipid transfer protein domain containing 2(Gltpd2)
OMA1	ENSMUSG00000035069	Mus musculus	OMA1 zinc metallopeptidase(Oma1)
DTL	ENSMUSG00000037474	Mus musculus	denticleless E3 ubiquitin protein ligase(Dtl)
PNCK	ENSMUSG00000002012	Mus musculus	pregnancy upregulated non-ubiquitously expressed CaM kinase(Pnck)
PICK1	ENSMUSG00000068206	Mus musculus	protein interacting with C kinase 1(Pick1)
MFI2	ENSMUSG00000022780	Mus musculus	antigen p97 (melanoma associated) identified by monoclonal antibodies 133.2 and 96.5(Mfi2)
CHP1	ENSMUSG00000014077	Mus musculus	calcineurin-like EF hand protein 1(Chp1)
NDEL1	ENSMUSG00000018736	Mus musculus	nudE neurodevelopment protein 1 like 1(Ndel1)
CHPF	ENSMUSG00000032997	Mus musculus	chondroitin polymerizing factor(Chpf)
PAM16	ENSMUSG00000014301	Mus musculus	presequence translocase-asssociated motor 16 homolog (S. cerevisiae)(Pam16)
AKAP5	ENSMUSG00000021057	Mus musculus	A kinase (PRKA) anchor protein 5(Akap5)
DSP	ENSMUSG00000054889	Mus musculus	desmoplakin(Dsp)
AKAP7	ENSMUSG00000039166	Mus musculus	A kinase (PRKA) anchor protein 7(Akap7)
AKAP8	ENSMUSG00000024045	Mus musculus	A kinase (PRKA) anchor protein 8(Akap8)
AKAP1	ENSMUSG00000018428	Mus musculus	A kinase (PRKA) anchor protein 1(Akap1)
AKAP2	ENSMUSG00000038729	Mus musculus	A kinase (PRKA) anchor protein 2(Akap2)
DST	ENSMUSG00000026131	Mus musculus	dystonin(Dst)
FUOM	ENSMUSG00000025466	Mus musculus	fucose mutarotase(Fuom)
ZC3H3	ENSMUSG00000075600	Mus musculus	zinc finger CCCH type containing 3(Zc3h3)
ZC3H4	ENSMUSG00000059273	Mus musculus	zinc finger CCCH-type containing 4(Zc3h4)
TNFAIP8L1	ENSMUSG00000044469	Mus musculus	tumor necrosis factor, alpha-induced protein 8-like 1(Tnfaip8l1)
GRAP	ENSMUSG00000004837	Mus musculus	GRB2-related adaptor protein(Grap)
GRB2	ENSMUSG00000059923	Mus musculus	growth factor receptor bound protein 2(Grb2)
DIAPH1	ENSMUSG00000024456	Mus musculus	diaphanous related formin 1(Diaph1)
DIAPH2	ENSMUSG00000034480	Mus musculus	diaphanous related formin 2(Diaph2)
DIAPH3	ENSMUSG00000022021	Mus musculus	diaphanous related formin 3(Diaph3)
ZC3H6	ENSMUSG00000042851	Mus musculus	zinc finger CCCH type containing 6(Zc3h6)
CSMD2	ENSMUSG00000028804	Mus musculus	CUB and Sushi multiple domains 2(Csmd2)
ZC3H8	ENSMUSG00000027387	Mus musculus	zinc finger CCCH type containing 8(Zc3h8)
PRR7	ENSMUSG00000034686	Mus musculus	proline rich 7 (synaptic)(Prr7)
EIF3C	ENSMUSG00000030738	Mus musculus	eukaryotic translation initiation factor 3, subunit C(Eif3c)
EIF3D	ENSMUSG00000016554	Mus musculus	eukaryotic translation initiation factor 3, subunit D(Eif3d)
EIF3A	ENSMUSG00000024991	Mus musculus	eukaryotic translation initiation factor 3, subunit A(Eif3a)
EIF3B	ENSMUSG00000056076	Mus musculus	eukaryotic translation initiation factor 3, subunit B(Eif3b)
EIF3G	ENSMUSG00000070319	Mus musculus	eukaryotic translation initiation factor 3, subunit G(Eif3g)
EIF3H	ENSMUSG00000022312	Mus musculus	eukaryotic translation initiation factor 3, subunit H(Eif3h)
EIF3E	ENSMUSG00000022336	Mus musculus	eukaryotic translation initiation factor 3, subunit E(Eif3e)
EIF3F	ENSMUSG00000031029	Mus musculus	eukaryotic translation initiation factor 3, subunit F(Eif3f)
EIF3K	ENSMUSG00000053565	Mus musculus	eukaryotic translation initiation factor 3, subunit K(Eif3k)
EIF3L	ENSMUSG00000033047	Mus musculus	eukaryotic translation initiation factor 3, subunit L(Eif3l)
EIF3I	ENSMUSG00000028798	Mus musculus	eukaryotic translation initiation factor 3, subunit I(Eif3i)
EIF3M	ENSMUSG00000027170	Mus musculus	eukaryotic translation initiation factor 3, subunit M(Eif3m)
HTT	ENSMUSG00000029104	Mus musculus	huntingtin(Htt)
FAM178A	ENSMUSG00000036097	Mus musculus	family with sequence similarity 178, member A(Fam178a)
PDZK1IP1	ENSMUSG00000028716	Mus musculus	PDZK1 interacting protein 1(Pdzk1ip1)
EIF4B	ENSMUSG00000058655	Mus musculus	eukaryotic translation initiation factor 4B(Eif4b)
CORO1C	ENSMUSG00000004530	Mus musculus	coronin, actin binding protein 1C(Coro1c)
CORO1B	ENSMUSG00000024835	Mus musculus	coronin, actin binding protein 1B(Coro1b)
CORO1A	ENSMUSG00000030707	Mus musculus	coronin, actin binding protein 1A(Coro1a)
TANGO6	ENSMUSG00000041949	Mus musculus	transport and golgi organization 6(Tango6)
EIF4E	ENSMUSG00000028156	Mus musculus	eukaryotic translation initiation factor 4E(Eif4e)
EIF4H	ENSMUSG00000040731	Mus musculus	eukaryotic translation initiation factor 4H(Eif4h)
TANGO2	ENSMUSG00000013539	Mus musculus	transport and golgi organization 2(Tango2)
LDOC1	ENSMUSG00000057615	Mus musculus	leucine zipper, down-regulated in cancer 1(Ldoc1)
GRB7	ENSMUSG00000019312	Mus musculus	growth factor receptor bound protein 7(Grb7)
CHRD	ENSMUSG00000006958	Mus musculus	chordin(Chrd)
PUF60	ENSMUSG00000002524	Mus musculus	poly-U binding splicing factor 60(Puf60)
DUT	ENSMUSG00000027203	Mus musculus	deoxyuridine triphosphatase(Dut)
UQCRC2	ENSMUSG00000030884	Mus musculus	ubiquinol cytochrome c reductase core protein 2(Uqcrc2)
PRPH	ENSMUSG00000023484	Mus musculus	peripherin(Prph)
UQCRC1	ENSMUSG00000025651	Mus musculus	ubiquinol-cytochrome c reductase core protein 1(Uqcrc1)
FAM175B	ENSMUSG00000030965	Mus musculus	family with sequence similarity 175, member B(Fam175b)
FAM175A	ENSMUSG00000035234	Mus musculus	family with sequence similarity 175, member A(Fam175a)
ZCWPW1	ENSMUSG00000037108	Mus musculus	zinc finger, CW type with PWWP domain 1(Zcwpw1)
PPIP5K1	ENSMUSG00000033526	Mus musculus	diphosphoinositol pentakisphosphate kinase 1(Ppip5k1)
BCAM	ENSMUSG00000002980	Mus musculus	basal cell adhesion molecule(Bcam)
IMMP2L	ENSMUSG00000056899	Mus musculus	IMP2 inner mitochondrial membrane peptidase-like (S. cerevisiae)(Immp2l)
EVI2A	ENSMUSG00000078771	Mus musculus	ecotropic viral integration site 2a(Evi2a)
PROZ	ENSMUSG00000031445	Mus musculus	protein Z, vitamin K-dependent plasma glycoprotein(Proz)
CHUK	ENSMUSG00000025199	Mus musculus	conserved helix-loop-helix ubiquitous kinase(Chuk)
HPD	ENSMUSG00000029445	Mus musculus	4-hydroxyphenylpyruvic acid dioxygenase(Hpd)
ANO10	ENSMUSG00000037949	Mus musculus	anoctamin 10(Ano10)
LEF1	ENSMUSG00000027985	Mus musculus	lymphoid enhancer binding factor 1(Lef1)
PROC	ENSMUSG00000024386	Mus musculus	protein C(Proc)
RTTN	ENSMUSG00000023066	Mus musculus	rotatin(Rttn)
IMMP1L	ENSMUSG00000042670	Mus musculus	IMP1 inner mitochondrial membrane peptidase-like (S. cerevisiae)(Immp1l)
MFN2	ENSMUSG00000029020	Mus musculus	mitofusin 2(Mfn2)
CLEC16A	ENSMUSG00000068663	Mus musculus	C-type lectin domain family 16, member A(Clec16a)
MFN1	ENSMUSG00000027668	Mus musculus	mitofusin 1(Mfn1)
DGAT1	ENSMUSG00000022555	Mus musculus	diacylglycerol O-acyltransferase 1(Dgat1)
DGAT2	ENSMUSG00000030747	Mus musculus	diacylglycerol O-acyltransferase 2(Dgat2)
PRNP	ENSMUSG00000079037	Mus musculus	prion protein(Prnp)
EXOC6B	ENSMUSG00000033769	Mus musculus	exocyst complex component 6B(Exoc6b)
MBL2	ENSMUSG00000024863	Mus musculus	mannose-binding lectin (protein C) 2(Mbl2)
FAM173B	ENSMUSG00000039065	Mus musculus	family with sequence similarity 173, member B(Fam173b)
FAM173A	ENSMUSG00000057411	Mus musculus	family with sequence similarity 173, member A(Fam173a)
XIAP	ENSMUSG00000025860	Mus musculus	X-linked inhibitor of apoptosis(Xiap)
CCDC144B	ENSMUSG00000047696	Mus musculus	coiled-coil domain containing 144B(Ccdc144b)
PRND	ENSMUSG00000027338	Mus musculus	prion protein dublet(Prnd)
AKAP9	ENSMUSG00000040407	Mus musculus	A kinase (PRKA) anchor protein (yotiao) 9(Akap9)
PALMD	ENSMUSG00000033377	Mus musculus	palmdelphin(Palmd)
SLC39A9	ENSMUSG00000048833	Mus musculus	solute carrier family 39 (zinc transporter), member 9(Slc39a9)
SLC39A8	ENSMUSG00000053897	Mus musculus	solute carrier family 39 (metal ion transporter), member 8(Slc39a8)
PALM3	ENSMUSG00000047986	Mus musculus	paralemmin 3(Palm3)
HRG	ENSMUSG00000022877	Mus musculus	histidine-rich glycoprotein(Hrg)
SLC39A6	ENSMUSG00000024270	Mus musculus	solute carrier family 39 (metal ion transporter), member 6(Slc39a6)
SLC39A5	ENSMUSG00000039878	Mus musculus	solute carrier family 39 (metal ion transporter), member 5(Slc39a5)
YES1	ENSMUSG00000014932	Mus musculus	YES proto-oncogene 1, Src family tyrosine kinase(Yes1)
SLC39A4	ENSMUSG00000063354	Mus musculus	solute carrier family 39 (zinc transporter), member 4(Slc39a4)
TNRC6B	ENSMUSG00000047888	Mus musculus	trinucleotide repeat containing 6b(Tnrc6b)
TNRC6A	ENSMUSG00000052707	Mus musculus	trinucleotide repeat containing 6a(Tnrc6a)
SLC39A3	ENSMUSG00000046822	Mus musculus	solute carrier family 39 (zinc transporter), member 3(Slc39a3)
SLC39A1	ENSMUSG00000052310	Mus musculus	solute carrier family 39 (zinc transporter), member 1(Slc39a1)
NGEF	ENSMUSG00000026259	Mus musculus	neuronal guanine nucleotide exchange factor(Ngef)
FAM174B	ENSMUSG00000078670	Mus musculus	family with sequence similarity 174, member B(Fam174b)
HPN	ENSMUSG00000001249	Mus musculus	hepsin(Hpn)
FAM174A	ENSMUSG00000051185	Mus musculus	family with sequence similarity 174, member A(Fam174a)
L3MBTL2	ENSMUSG00000022394	Mus musculus	l(3)mbt-like 2 (Drosophila)(L3mbtl2)
SIRT4	ENSMUSG00000029524	Mus musculus	sirtuin 4(Sirt4)
SIRT5	ENSMUSG00000054021	Mus musculus	sirtuin 5(Sirt5)
SIRT6	ENSMUSG00000034748	Mus musculus	sirtuin 6(Sirt6)
SIRT7	ENSMUSG00000025138	Mus musculus	sirtuin 7(Sirt7)
SIRT1	ENSMUSG00000020063	Mus musculus	sirtuin 1(Sirt1)
SIRT2	ENSMUSG00000015149	Mus musculus	sirtuin 2(Sirt2)
SIRT3	ENSMUSG00000025486	Mus musculus	sirtuin 3(Sirt3)
CLEC18A	ENSMUSG00000033633	Mus musculus	C-type lectin domain family 18, member A(Clec18a)
PRLR	ENSMUSG00000005268	Mus musculus	prolactin receptor(Prlr)
HPX	ENSMUSG00000030895	Mus musculus	hemopexin(Hpx)
DR1	ENSMUSG00000029265	Mus musculus	down-regulator of transcription 1(Dr1)
NGDN	ENSMUSG00000022204	Mus musculus	neuroguidin, EIF4E binding protein(Ngdn)
MAPK8IP3	ENSMUSG00000024163	Mus musculus	mitogen-activated protein kinase 8 interacting protein 3(Mapk8ip3)
PRM1	ENSMUSG00000022501	Mus musculus	protamine 1(Prm1)
POFUT2	ENSMUSG00000020260	Mus musculus	protein O-fucosyltransferase 2(Pofut2)
EVI5L	ENSMUSG00000011832	Mus musculus	ecotropic viral integration site 5 like(Evi5l)
POFUT1	ENSMUSG00000046020	Mus musculus	protein O-fucosyltransferase 1(Pofut1)
SH3BP2	ENSMUSG00000054520	Mus musculus	SH3-domain binding protein 2(Sh3bp2)
PPP1R27	ENSMUSG00000025129	Mus musculus	protein phosphatase 1, regulatory subunit 27(Ppp1r27)
SCAF1	ENSMUSG00000038406	Mus musculus	SR-related CTD-associated factor 1(Scaf1)
SCAF4	ENSMUSG00000022983	Mus musculus	SR-related CTD-associated factor 4(Scaf4)
PPP1R21	ENSMUSG00000034709	Mus musculus	protein phosphatase 1, regulatory subunit 21(Ppp1r21)
STRN	ENSMUSG00000024077	Mus musculus	striatin, calmodulin binding protein(Strn)
RANGAP1	ENSMUSG00000022391	Mus musculus	RAN GTPase activating protein 1(Rangap1)
CLK1	ENSMUSG00000026034	Mus musculus	CDC-like kinase 1(Clk1)
ANKLE2	ENSMUSG00000029501	Mus musculus	ankyrin repeat and LEM domain containing 2(Ankle2)
ANKLE1	ENSMUSG00000046295	Mus musculus	ankyrin repeat and LEM domain containing 1(Ankle1)
FAH	ENSMUSG00000030630	Mus musculus	fumarylacetoacetate hydrolase(Fah)
HTR1B	ENSMUSG00000049511	Mus musculus	5-hydroxytryptamine (serotonin) receptor 1B(Htr1b)
BRPF1	ENSMUSG00000001632	Mus musculus	bromodomain and PHD finger containing, 1(Brpf1)
CDCA8	ENSMUSG00000028873	Mus musculus	cell division cycle associated 8(Cdca8)
CDCA7	ENSMUSG00000055612	Mus musculus	cell division cycle associated 7(Cdca7)
BRPF3	ENSMUSG00000063952	Mus musculus	bromodomain and PHD finger containing, 3(Brpf3)
CLK2	ENSMUSG00000068917	Mus musculus	CDC-like kinase 2(Clk2)
FAP	ENSMUSG00000000392	Mus musculus	fibroblast activation protein(Fap)
CLK4	ENSMUSG00000020385	Mus musculus	CDC like kinase 4(Clk4)
CDCA2	ENSMUSG00000048922	Mus musculus	cell division cycle associated 2(Cdca2)
FAU	ENSMUSG00000038274	Mus musculus	Finkel-Biskis-Reilly murine sarcoma virus (FBR-MuSV) ubiquitously expressed (fox derived)(Fau)
FAS	ENSMUSG00000024778	Mus musculus	Fas (TNF receptor superfamily member 6)(Fas)
HTR1D	ENSMUSG00000070687	Mus musculus	5-hydroxytryptamine (serotonin) receptor 1D(Htr1d)
CDCA5	ENSMUSG00000024791	Mus musculus	cell division cycle associated 5(Cdca5)
CDCA4	ENSMUSG00000047832	Mus musculus	cell division cycle associated 4(Cdca4)
CDCA3	ENSMUSG00000023505	Mus musculus	cell division cycle associated 3(Cdca3)
PHOX2A	ENSMUSG00000007946	Mus musculus	paired-like homeobox 2a(Phox2a)
PHOX2B	ENSMUSG00000012520	Mus musculus	paired-like homeobox 2b(Phox2b)
PPP1R37	ENSMUSG00000051403	Mus musculus	protein phosphatase 1, regulatory subunit 37(Ppp1r37)
EMG1	ENSMUSG00000004268	Mus musculus	EMG1 N1-specific pseudouridine methyltransferase(Emg1)
PPP1R35	ENSMUSG00000029725	Mus musculus	protein phosphatase 1, regulatory subunit 35(Ppp1r35)
PITPNM1	ENSMUSG00000024851	Mus musculus	phosphatidylinositol transfer protein, membrane-associated 1(Pitpnm1)
AAAS	ENSMUSG00000036678	Mus musculus	achalasia, adrenocortical insufficiency, alacrimia(Aaas)
HNF4A	ENSMUSG00000017950	Mus musculus	hepatic nuclear factor 4, alpha(Hnf4a)
TGIF1	ENSMUSG00000047407	Mus musculus	TGFB-induced factor homeobox 1(Tgif1)
TGIF2	ENSMUSG00000062175	Mus musculus	TGFB-induced factor homeobox 2(Tgif2)
SCAF8	ENSMUSG00000046201	Mus musculus	SR-related CTD-associated factor 8(Scaf8)
ZFAS1	ENSMUSG00000074578	Mus musculus	zinc finger, NFX1-type containing 1, antisense RNA 1(Zfas1)
NIFK	ENSMUSG00000026377	Mus musculus	nucleolar protein interacting with the FHA domain of MKI67(Nifk)
PPP1R3E	ENSMUSG00000072494	Mus musculus	protein phosphatase 1, regulatory (inhibitor) subunit 3E(Ppp1r3e)
PPP1R3D	ENSMUSG00000049999	Mus musculus	protein phosphatase 1, regulatory subunit 3D(Ppp1r3d)
PPP1R3C	ENSMUSG00000067279	Mus musculus	protein phosphatase 1, regulatory (inhibitor) subunit 3C(Ppp1r3c)
PPP1R3B	ENSMUSG00000046794	Mus musculus	protein phosphatase 1, regulatory (inhibitor) subunit 3B(Ppp1r3b)
CACYBP	ENSMUSG00000014226	Mus musculus	calcyclin binding protein(Cacybp)
PPP1R3F	ENSMUSG00000039556	Mus musculus	protein phosphatase 1, regulatory (inhibitor) subunit 3F(Ppp1r3f)
RCHY1	ENSMUSG00000029397	Mus musculus	ring finger and CHY zinc finger domain containing 1(Rchy1)
DNMT3B	ENSMUSG00000027478	Mus musculus	DNA methyltransferase 3B(Dnmt3b)
FAHD2A	ENSMUSG00000027371	Mus musculus	fumarylacetoacetate hydrolase domain containing 2A(Fahd2a)
DNMT3A	ENSMUSG00000020661	Mus musculus	DNA methyltransferase 3A(Dnmt3a)
EME2	ENSMUSG00000073436	Mus musculus	essential meiotic structure-specific endonuclease subunit 2(Eme2)
EME1	ENSMUSG00000039055	Mus musculus	essential meiotic structure-specific endonuclease 1(Eme1)
SPTSSB	ENSMUSG00000043461	Mus musculus	serine palmitoyltransferase, small subunit B(Sptssb)
SPTSSA	ENSMUSG00000044408	Mus musculus	serine palmitoyltransferase, small subunit A(Sptssa)
TFCP2	ENSMUSG00000009733	Mus musculus	transcription factor CP2(Tfcp2)
[truncated: 9,110 more rows]

## Sheet: B-Significant Sp1 targets ctx
symbol	baseMean	MUT.Mean	CTRL.Mean	log2FoldChange	lfcSE	stat	pvalue	padj	symbol	biotype
ENSMUSG00000021303	5455.27	3460.36	7450.18	-1.055	0.0554241	-18.6616	1.01674e-77	1.92173e-73	Gng4	protein_coding
ENSMUSG00000079657	1374.43	2010.61	738.258	1.38402	0.0840094	16.1909	5.85013e-59	5.52866e-55	Rab26	protein_coding
ENSMUSG00000027500	44873	29328.2	60417.8	-1.01971	0.0711721	-14.1553	1.73123e-45	8.18052e-42	Stmn2	protein_coding
ENSMUSG00000020415	207.779	76.6788	338.88	-1.86074	0.126492	-14.0337	9.69476e-45	2.61772e-41	Pttg1	protein_coding
ENSMUSG00000030792	257.396	106.881	407.912	-1.72332	0.118949	-14.0362	9.35489e-45	2.61772e-41	Dkkl1	protein_coding
ENSMUSG00000022054	6409.75	4140.17	8679.32	-1.02551	0.0723194	-13.9031	6.06208e-44	1.14579e-40	Nefm	protein_coding
ENSMUSG00000031328	9543.3	6393.5	12693.1	-0.956627	0.0693246	-13.5646	6.49262e-42	1.02264e-38	Flna	protein_coding
ENSMUSG00000062380	19174	11130.8	27217.3	-1.22403	0.0909535	-13.2471	4.69257e-40	5.91295e-37	Tubb3	protein_coding
ENSMUSG00000020396	1550.46	883.722	2217.19	-1.23348	0.0925493	-12.9052	4.2095e-38	4.97274e-35	Nefh	protein_coding
ENSMUSG00000079523	1991.53	1243.71	2739.35	-1.10271	0.0866909	-12.6441	1.20614e-36	1.19985e-33	Tmsb10	protein_coding
ENSMUSG00000021196	20478.2	14121	26835.3	-0.90504	0.0710528	-12.5834	2.60409e-36	2.23727e-33	Pfkp	protein_coding
ENSMUSG00000030782	763.685	503.02	1024.35	-0.983163	0.0798774	-12.065	1.61567e-33	1.32773e-30	Tgfb1i1	protein_coding
ENSMUSG00000006356	3562.75	2497.91	4627.6	-0.861369	0.0711752	-11.9133	1.00881e-32	7.9448e-30	Crip2	protein_coding
ENSMUSG00000011256	2235.14	1637.43	2832.85	-0.770095	0.0660547	-11.4792	1.67902e-30	1.22059e-27	Adam19	protein_coding
ENSMUSG00000047261	21690.2	14711.5	28668.9	-0.926957	0.0798961	-11.4188	3.36849e-30	2.35807e-27	Gap43	protein_coding
ENSMUSG00000024981	2765.61	2117.33	3413.89	-0.674006	0.0587441	-11.3159	1.09424e-29	7.38651e-27	Acsl5	protein_coding
ENSMUSG00000027397	5203.13	4103.98	6302.28	-0.60247	0.0527597	-11.2615	2.03211e-29	1.2803e-26	Slc20a1	protein_coding
ENSMUSG00000071658	7374.15	5633.2	9115.09	-0.681715	0.0598343	-11.2573	2.13263e-29	1.30029e-26	Gng3	protein_coding
ENSMUSG00000021814	2177.33	1598.21	2756.46	-0.757456	0.0663349	-11.199	4.1233e-29	2.43545e-26	Anxa7	protein_coding
ENSMUSG00000097767	30018	22192.3	37843.8	-0.750871	0.0661531	-11.1907	4.52893e-29	2.59398e-26	Miat	lincRNA
ENSMUSG00000093930	30840	23406.3	38273.8	-0.709857	0.0631492	-11.1772	5.27403e-29	2.93189e-26	Hmgcs1	protein_coding
ENSMUSG00000029580	22677	17233.8	28120.2	-0.674277	0.0600744	-10.9941	4.0802e-28	2.07615e-25	Actb	protein_coding
ENSMUSG00000028051	1069.2	720.269	1418.13	-0.936465	0.08482	-10.8835	1.38081e-27	6.69199e-25	Hcn3	protein_coding
ENSMUSG00000000184	5365.05	4251.13	6478.97	-0.588618	0.0545991	-10.6149	2.542e-26	1.11736e-23	Ccnd2	protein_coding
ENSMUSG00000032249	5481.03	4303.71	6658.35	-0.616475	0.0574281	-10.5952	3.13542e-26	1.34688e-23	Anp32a	protein_coding
ENSMUSG00000033392	18071.4	15034.2	21108.5	-0.496512	0.0468299	-10.5548	4.82467e-26	2.02647e-23	Clasp2	protein_coding
ENSMUSG00000023495	4727.51	3395.51	6059.52	-0.811998	0.0766965	-10.4636	1.2693e-25	5.10448e-23	Pcbp4	protein_coding
ENSMUSG00000073433	3496.13	2299.47	4692.79	-0.979722	0.0928251	-10.4295	1.81909e-25	7.16306e-23	Arhgdig	protein_coding
ENSMUSG00000022048	7357.64	5501.89	9213.38	-0.698406	0.0653851	-10.3825	2.97949e-25	1.14929e-22	Dpysl2	protein_coding
ENSMUSG00000041263	3390.01	2438.09	4341.93	-0.788716	0.0745814	-10.3046	6.71708e-25	2.53919e-22	Rusc1	protein_coding
ENSMUSG00000020689	410.65	269.188	552.111	-0.991345	0.0962318	-10.2754	9.0987e-25	3.3072e-22	Itgb3	protein_coding
ENSMUSG00000029223	15863.3	12025.2	19701.4	-0.696234	0.0673216	-10.2114	1.76276e-24	6.17e-22	Uchl1	protein_coding
ENSMUSG00000018507	814.091	541.001	1087.18	-0.947301	0.0908603	-10.1951	2.08599e-24	6.93044e-22	Trpv2	protein_coding
ENSMUSG00000027581	18830.4	14176.1	23484.7	-0.710738	0.0687853	-10.1977	2.02965e-24	6.93044e-22	Stmn3	protein_coding
ENSMUSG00000041959	892.127	540.849	1243.4	-1.10682	0.106062	-10.1949	2.09002e-24	6.93044e-22	S100a10	protein_coding
ENSMUSG00000032946	2647.89	1766.49	3529.3	-0.934556	0.0894812	-10.1555	3.13055e-24	1.00289e-21	Rasgrp2	protein_coding
ENSMUSG00000042105	12967.8	10386.7	15549	-0.571278	0.0557061	-10.1315	4.00403e-24	1.22065e-21	Inpp5f	protein_coding
ENSMUSG00000087141	10011.5	7766.22	12256.7	-0.658593	0.0653122	-10.0323	1.09948e-23	3.29863e-21	Plcxd2	protein_coding
ENSMUSG00000025950	3933.76	2886.06	4981.45	-0.770739	0.0766223	-9.97067	2.04839e-23	5.86616e-21	Idh1	protein_coding
ENSMUSG00000021670	9959.08	8260.21	11657.9	-0.490846	0.0488895	-9.94206	2.73109e-23	7.70452e-21	Hmgcr	protein_coding
ENSMUSG00000012126	532.754	696.306	369.203	0.870774	0.0856544	9.93485	2.93609e-23	8.16103e-21	Ubxn11	protein_coding
ENSMUSG00000038587	1547.71	1009.49	2085.92	-0.974415	0.0959754	-9.87564	5.30913e-23	1.45432e-20	Akap12	protein_coding
ENSMUSG00000072235	15331.9	10469.2	20194.7	-0.889742	0.0881269	-9.82663	8.64633e-23	2.31405e-20	Tuba1a	protein_coding
ENSMUSG00000020914	670.172	467.071	873.273	-0.85522	0.0855847	-9.77001	1.51443e-22	3.86815e-20	Top2a	protein_coding
ENSMUSG00000044847	10792.9	8233.15	13352.7	-0.691553	0.0710403	-9.67617	3.80699e-22	9.46787e-20	Lsm11	protein_coding
ENSMUSG00000036246	881.949	612.131	1151.77	-0.861664	0.0872498	-9.66228	4.36035e-22	1.07032e-19	Gmip	protein_coding
ENSMUSG00000034616	1433.85	1086.28	1781.43	-0.682017	0.0693241	-9.61716	6.76723e-22	1.59884e-19	Ssh3	protein_coding
ENSMUSG00000048385	3120.44	2354.38	3886.51	-0.704807	0.0727229	-9.57159	1.05279e-21	2.45664e-19	Scrt1	protein_coding
ENSMUSG00000028089	685.624	882.18	489.067	0.807927	0.0821934	9.56416	1.1312e-21	2.60741e-19	Chd1l	protein_coding
ENSMUSG00000045664	379.451	251.748	507.154	-0.946629	0.0972571	-9.55011	1.29558e-21	2.95034e-19	Cdc42ep2	protein_coding
ENSMUSG00000003348	581.753	397.234	766.272	-0.89011	0.091585	-9.49595	2.18207e-21	4.85216e-19	Mob3a	protein_coding
ENSMUSG00000018012	2433.95	1646.63	3221.28	-0.926473	0.0980916	-9.47226	2.73852e-21	6.0187e-19	Rac3	protein_coding
ENSMUSG00000038766	1328.99	1607.06	1050.92	0.610166	0.0639031	9.46883	2.82983e-21	6.14789e-19	Gabpb2	protein_coding
ENSMUSG00000031004	804.225	557.086	1051.36	-0.856714	0.0878733	-9.44082	3.69864e-21	7.94409e-19	Mki67	protein_coding
ENSMUSG00000017144	1498.79	1178.34	1819.24	-0.625385	0.066006	-9.4202	4.50225e-21	9.45522e-19	Rnd3	protein_coding
ENSMUSG00000022594	8829.87	5693.76	11966	-0.982325	0.10081	-9.41276	4.83285e-21	1.0038e-18	Lynx1	protein_coding
ENSMUSG00000025607	2531.97	3017.52	2046.43	0.543715	0.057138	9.36545	7.57272e-21	1.53905e-18	Copg2	protein_coding
ENSMUSG00000028927	642.07	856.348	427.793	0.923367	0.0953145	9.34921	8.83053e-21	1.77559e-18	Padi2	protein_coding
ENSMUSG00000022847	268.895	368.469	169.321	1.02773	0.107235	9.33057	1.05298e-20	2.095e-18	Thpo	protein_coding
ENSMUSG00000021066	4474.46	3709.17	5239.75	-0.493681	0.0529327	-9.23349	2.61966e-20	5.15772e-18	Atl1	protein_coding
ENSMUSG00000027533	3691.71	3039.63	4343.8	-0.518822	0.0559276	-9.22676	2.78931e-20	5.43512e-18	Fabp5	protein_coding
ENSMUSG00000021223	519.587	342.404	696.77	-0.9532	0.102025	-9.19901	3.61265e-20	6.96763e-18	Papln	protein_coding
ENSMUSG00000058672	19998.5	15322.8	24674.3	-0.660021	0.0705458	-9.1746	4.53272e-20	8.65383e-18	Tubb2a	protein_coding
ENSMUSG00000021203	1680.36	2127.29	1233.44	0.748499	0.0809204	9.0533	1.38718e-19	2.54554e-17	Otub2	protein_coding
ENSMUSG00000039824	413.322	268.236	558.407	-0.978165	0.107151	-9.0282	1.74522e-19	3.17176e-17	Myl6b	protein_coding
ENSMUSG00000023484	190.149	88.4645	291.834	-1.37542	0.154869	-8.98604	2.56288e-19	4.56991e-17	Prph	protein_coding
ENSMUSG00000068876	332.657	194.918	470.396	-1.11984	0.119826	-8.98677	2.54601e-19	4.56991e-17	Cgn	protein_coding
ENSMUSG00000051652	1165.08	839.771	1490.38	-0.790467	0.086793	-8.97306	2.88397e-19	5.09439e-17	Lrrc3	protein_coding
ENSMUSG00000020142	3770.57	2965.77	4575.37	-0.597379	0.0651831	-8.96646	3.0619e-19	5.35861e-17	Slc1a4	protein_coding
ENSMUSG00000002012	5009.29	5978.03	4040.55	0.544579	0.0599821	8.90855	5.17047e-19	8.96578e-17	Pnck	protein_coding
ENSMUSG00000102252	16872.4	13903.1	19841.7	-0.498088	0.0553672	-8.86287	7.79792e-19	1.32782e-16	Snrpn	protein_coding
ENSMUSG00000044349	95506.3	80108.1	110904	-0.454044	0.0506235	-8.84182	9.41738e-19	1.58927e-16	Snhg11	protein_coding
ENSMUSG00000046598	6877.04	5572.73	8181.34	-0.546783	0.0613876	-8.81739	1.17156e-18	1.94242e-16	Bdh1	protein_coding
ENSMUSG00000030380	1062.01	1295.97	828.056	0.625867	0.0697636	8.81286	1.2199e-18	2.00499e-16	Mzf1	protein_coding
ENSMUSG00000032735	2228.95	1640.27	2817.63	-0.737191	0.081534	-8.80933	1.25893e-18	2.05129e-16	Ablim3	protein_coding
ENSMUSG00000036882	10746.7	8640.52	12852.8	-0.563053	0.0632209	-8.80471	1.31191e-18	2.11934e-16	Arhgap33	protein_coding
ENSMUSG00000021143	6676.18	5442.06	7910.3	-0.538993	0.0611008	-8.76338	1.89476e-18	3.00948e-16	Pacs2	protein_coding
ENSMUSG00000022351	5714.08	4662.81	6765.34	-0.535134	0.0606699	-8.75444	2.05122e-18	3.23084e-16	Sqle	protein_coding
ENSMUSG00000020003	1674.69	2019.17	1330.21	0.57862	0.0649788	8.72111	2.75488e-18	4.23333e-16	Pex7	protein_coding
ENSMUSG00000046699	1778.02	1406.76	2149.29	-0.599307	0.0679755	-8.70023	3.31204e-18	5.04845e-16	Slitrk4	protein_coding
ENSMUSG00000028937	8731.42	6970.13	10492.7	-0.572604	0.0648412	-8.69394	3.50068e-18	5.29331e-16	Acot7	protein_coding
ENSMUSG00000051391	51304	40961.1	61646.9	-0.572046	0.0648037	-8.6881	3.68548e-18	5.52852e-16	Ywhag	protein_coding
ENSMUSG00000025420	259.024	350.372	167.676	0.974511	0.110935	8.58717	8.91377e-18	1.30604e-15	Katnal2	protein_coding
ENSMUSG00000025485	2575	2067.32	3082.67	-0.561371	0.0645039	-8.57412	9.98462e-18	1.45169e-15	Ric8a	protein_coding
ENSMUSG00000029875	1262.14	906.848	1617.44	-0.787262	0.0899706	-8.56143	1.11476e-17	1.60841e-15	Ccdc184	protein_coding
ENSMUSG00000053192	22967.4	18789.4	27145.4	-0.53393	0.0621502	-8.55442	1.18463e-17	1.69627e-15	Mllt11	protein_coding
ENSMUSG00000026014	4190.21	3325.61	5054.81	-0.576114	0.0658449	-8.55146	1.2154e-17	1.72723e-15	Raph1	protein_coding
ENSMUSG00000076432	3199.41	2552.19	3846.63	-0.578193	0.0667866	-8.54152	1.32464e-17	1.86843e-15	Ywhaq	protein_coding
ENSMUSG00000027378	934.753	1171	698.502	0.705072	0.080275	8.53181	1.4407e-17	2.00225e-15	Nphp1	protein_coding
ENSMUSG00000028333	1332.59	1043.71	1621.48	-0.623865	0.0726972	-8.50071	1.8843e-17	2.59087e-15	Anp32b	protein_coding
ENSMUSG00000066441	1686.57	1369.29	2003.84	-0.540924	0.0629167	-8.50026	1.89164e-17	2.59087e-15	Rdh11	protein_coding
ENSMUSG00000034220	3835.5	3004.36	4666.64	-0.615091	0.0713023	-8.49159	2.03827e-17	2.77161e-15	Gpc1	protein_coding
ENSMUSG00000066406	2655.84	3090.99	2220.7	0.487336	0.0576172	8.44512	3.0373e-17	4.01454e-15	Akap13	protein_coding
ENSMUSG00000060240	8820.55	7099.3	10541.8	-0.556647	0.0651734	-8.42397	3.63935e-17	4.74395e-15	Cend1	protein_coding
ENSMUSG00000069662	14085.8	11252.2	16919.3	-0.561923	0.0653654	-8.40921	4.12798e-17	5.34403e-15	Marcks	protein_coding
ENSMUSG00000026516	4926.89	5631.51	4222.26	0.412254	0.049012	8.33372	7.83397e-17	9.93757e-15	Nvl	protein_coding
ENSMUSG00000030652	1013.35	1241.29	785.418	0.619416	0.0720605	8.31562	9.12731e-17	1.1501e-14	Coq7	protein_coding
ENSMUSG00000059796	2659.22	2146.19	3172.25	-0.553063	0.0657686	-8.30914	9.64e-17	1.20666e-14	Eif4a1	protein_coding
ENSMUSG00000030711	179.084	252.943	105.225	1.10009	0.126075	8.26881	1.35303e-16	1.67148e-14	Sult1a1	protein_coding
ENSMUSG00000021614	3352.6	2696.93	4008.28	-0.563597	0.0675138	-8.26434	1.40465e-16	1.72399e-14	Vcan	protein_coding
ENSMUSG00000018405	506.116	361.166	651.066	-0.799915	0.0956859	-8.21265	2.16352e-16	2.60464e-14	Mrm1	protein_coding
ENSMUSG00000032193	807.912	610.814	1005.01	-0.679872	0.0809724	-8.18392	2.74754e-16	3.22554e-14	Ldlr	protein_coding
ENSMUSG00000027952	1924.77	1581.33	2268.22	-0.524093	0.063922	-8.17658	2.92021e-16	3.40709e-14	Pmvk	protein_coding
ENSMUSG00000006517	1154.51	855.856	1453.16	-0.725776	0.0881314	-8.10296	5.36364e-16	6.14413e-14	Mvd	protein_coding
ENSMUSG00000020836	944.033	684.548	1203.52	-0.756889	0.0904261	-8.08061	6.44431e-16	7.22423e-14	Coro6	protein_coding
ENSMUSG00000028832	1671.27	1184.82	2157.71	-0.815029	0.0997526	-8.08033	6.45942e-16	7.22423e-14	Stmn1	protein_coding
ENSMUSG00000030946	1222.23	1511.05	933.417	0.656254	0.0792251	8.05098	8.2133e-16	9.07834e-14	Lhpp	protein_coding
ENSMUSG00000036067	1297.95	1000.18	1595.71	-0.64392	0.07847	-8.03566	9.30736e-16	1.01103e-13	Slc2a6	protein_coding
ENSMUSG00000020803	1298.46	1014.74	1582.17	-0.628982	0.07784	-8.02978	9.76477e-16	1.05465e-13	Txndc17	protein_coding
ENSMUSG00000000489	1074.99	805.847	1344.13	-0.685523	0.0822703	-8.02154	1.04432e-15	1.12151e-13	Pdgfb	protein_coding
ENSMUSG00000046807	1010.72	766.408	1255.04	-0.69178	0.0863047	-7.99888	1.25561e-15	1.33327e-13	Lrrc75b	protein_coding
ENSMUSG00000036644	9613.21	11730.4	7495.98	0.596422	0.0719126	7.97344	1.54315e-15	1.62039e-13	Tbc1d9b	protein_coding
ENSMUSG00000020287	788.437	965.813	611.061	0.6193	0.0752065	7.95325	1.81676e-15	1.89716e-13	Mpg	protein_coding
ENSMUSG00000025505	838.052	1013.68	662.428	0.593359	0.0734009	7.94481	1.94489e-15	2.0198e-13	Tmem80	protein_coding
ENSMUSG00000005087	424.235	271.338	577.132	-0.972899	0.119884	-7.93848	2.04669e-15	2.1139e-13	Cd44	protein_coding
ENSMUSG00000052387	2216.17	1663.32	2769.03	-0.714611	0.0902006	-7.9262	2.25952e-15	2.32104e-13	Trpm3	protein_coding
ENSMUSG00000002343	1311.87	1057.2	1566.55	-0.556674	0.0695885	-7.91545	2.46363e-15	2.51703e-13	Armc6	protein_coding
ENSMUSG00000023067	753.633	531.342	975.925	-0.802162	0.0977863	-7.87686	3.3571e-15	3.41143e-13	Cdkn1a	protein_coding
ENSMUSG00000068391	535.085	672.72	397.45	0.708235	0.0866047	7.87093	3.52021e-15	3.55805e-13	Chrac1	protein_coding
ENSMUSG00000033615	13671.2	11022.4	16320	-0.543576	0.0677953	-7.8601	3.83819e-15	3.85881e-13	Cplx1	protein_coding
ENSMUSG00000039470	4305.71	3458.58	5152.83	-0.569887	0.0722987	-7.83852	4.55895e-15	4.55919e-13	Zdhhc2	protein_coding
ENSMUSG00000002147	403.346	291.556	515.137	-0.761566	0.0937638	-7.8378	4.58505e-15	4.56116e-13	Stat6	protein_coding
ENSMUSG00000029231	5188.25	4419.01	5957.49	-0.43891	0.0558902	-7.8352	4.68112e-15	4.63235e-13	Pdgfra	protein_coding
ENSMUSG00000041037	6171.08	5129.94	7212.21	-0.469374	0.0587318	-7.82875	4.92747e-15	4.85073e-13	Irgq	protein_coding
ENSMUSG00000035545	18518.2	20762.8	16273.7	0.361863	0.0464477	7.777	7.42632e-15	7.16148e-13	Leng8	protein_coding
ENSMUSG00000044708	8773.13	6995.01	10551.2	-0.586438	0.075183	-7.7687	7.92986e-15	7.60824e-13	Kcnj10	protein_coding
ENSMUSG00000047496	1967.58	1517.22	2417.94	-0.665574	0.0863901	-7.76514	8.15523e-15	7.78495e-13	Rnf152	protein_coding
ENSMUSG00000009292	1527.56	1821.19	1233.93	0.554923	0.0710873	7.75353	8.93758e-15	8.4889e-13	Trpm2	protein_coding
ENSMUSG00000060600	344.139	445.766	242.513	0.807795	0.100249	7.73361	1.04542e-14	9.87976e-13	Eno3	protein_coding
ENSMUSG00000020258	344.762	444.874	244.65	0.806224	0.101886	7.72721	1.09931e-14	1.02862e-12	Glyctk	protein_coding
ENSMUSG00000072640	3081.95	3615.59	2548.32	0.483886	0.0616587	7.68554	1.52356e-14	1.40472e-12	Lyrm9	protein_coding
ENSMUSG00000031816	1646.71	1917.88	1375.55	0.47344	0.0612888	7.63871	2.19404e-14	2.01309e-12	Mthfsd	protein_coding
ENSMUSG00000027981	2170.83	2551.34	1790.33	0.495643	0.0637707	7.63008	2.34612e-14	2.13192e-12	Rnpc3	protein_coding
ENSMUSG00000025132	11118.8	9369.37	12868.1	-0.44496	0.0574819	-7.62762	2.39124e-14	2.16253e-12	Arhgdia	protein_coding
ENSMUSG00000057147	1335.16	1618.89	1051.42	0.599576	0.0773137	7.62536	2.43362e-14	2.19037e-12	Dph6	protein_coding
ENSMUSG00000015942	748.751	905.986	591.516	0.596397	0.0773035	7.60047	2.95049e-14	2.61818e-12	Gtf2ird2	protein_coding
ENSMUSG00000038065	9417.29	7070.53	11764.1	-0.704073	0.0918693	-7.59849	2.996e-14	2.64614e-12	Mturn	protein_coding
ENSMUSG00000038366	6488.66	5505.49	7471.83	-0.431639	0.0561892	-7.58631	3.29138e-14	2.86684e-12	Lasp1	protein_coding
ENSMUSG00000068290	2073.5	2425.2	1721.79	0.483874	0.0629475	7.575	3.59138e-14	3.11379e-12	Ddrgk1	protein_coding
ENSMUSG00000008859	6094.51	5064.17	7124.84	-0.494047	0.0650418	-7.56453	3.89256e-14	3.3291e-12	Rala	protein_coding
ENSMUSG00000036086	698.926	863.463	534.39	0.650402	0.083227	7.55828	4.08428e-14	3.44629e-12	Zranb3	protein_coding
ENSMUSG00000025213	59.0712	95.3181	22.8243	1.43149	0.176115	7.54884	4.39154e-14	3.67277e-12	Kazald1	protein_coding
ENSMUSG00000024777	7063.14	5909.38	8216.9	-0.470444	0.0617612	-7.54505	4.52125e-14	3.76459e-12	Ppp2r5b	protein_coding
ENSMUSG00000025875	768.775	605.051	932.499	-0.608075	0.0800896	-7.54193	4.6307e-14	3.83881e-12	Tspan17	protein_coding
ENSMUSG00000039850	1389.61	1636.17	1143.06	0.490807	0.0633756	7.53593	4.84851e-14	3.96717e-12	Endov	protein_coding
ENSMUSG00000040795	899.511	1098.37	700.651	0.611008	0.0785244	7.52767	5.16542e-14	4.20826e-12	Iqcc	protein_coding
ENSMUSG00000039114	3208.55	2455.7	3961.39	-0.6377	0.0813669	-7.52313	5.348e-14	4.33831e-12	Nrn1	protein_coding
ENSMUSG00000026223	12775.6	15549.8	10001.4	0.619699	0.0818825	7.52092	5.4393e-14	4.39351e-12	Itm2c	protein_coding
ENSMUSG00000020121	1771.63	1340.43	2202.83	-0.676605	0.0878631	-7.51727	5.59336e-14	4.49873e-12	Srgap1	protein_coding
ENSMUSG00000038205	3071.33	2597.55	3545.11	-0.436423	0.0571973	-7.5111	5.86341e-14	4.69594e-12	Prkab2	protein_coding
ENSMUSG00000001763	845.811	1031.53	660.093	0.614972	0.0804226	7.49453	6.65371e-14	5.262e-12	Tspan33	protein_coding
ENSMUSG00000071644	1297.92	1063.76	1532.08	-0.531332	0.0711545	-7.49144	6.81225e-14	5.36493e-12	Eef1g	protein_coding
ENSMUSG00000024937	1672.35	1254.94	2089.76	-0.696464	0.091695	-7.46941	8.05562e-14	6.24014e-12	Ehbp1l1	protein_coding
ENSMUSG00000034926	4833.46	4120.57	5546.34	-0.420352	0.0556089	-7.46533	8.30936e-14	6.41042e-12	Dhcr24	protein_coding
ENSMUSG00000007021	7193.9	6098.41	8289.38	-0.427007	0.056258	-7.46375	8.40914e-14	6.46102e-12	Syngr3	protein_coding
ENSMUSG00000021913	2684.71	3213.2	2156.22	0.557501	0.0739005	7.43798	1.02237e-13	7.76059e-12	Ogdhl	protein_coding
ENSMUSG00000015961	4296.76	3685.16	4908.36	-0.416999	0.0557795	-7.43676	1.03182e-13	7.80095e-12	Adss	protein_coding
ENSMUSG00000018659	1837.55	2177.17	1497.93	0.507495	0.0663586	7.42832	1.09982e-13	8.28195e-12	Pnpo	protein_coding
ENSMUSG00000021273	2709.89	2285.52	3134.27	-0.451151	0.060168	-7.42217	1.15217e-13	8.64176e-12	Fdft1	protein_coding
ENSMUSG00000022865	12949.4	10278.5	15620.3	-0.591256	0.0791095	-7.42007	1.17062e-13	8.74544e-12	Cxadr	protein_coding
ENSMUSG00000021710	1703.79	1295.67	2111.91	-0.656819	0.0856501	-7.41867	1.18301e-13	8.80317e-12	Nln	protein_coding
ENSMUSG00000018554	260.913	350.161	171.664	0.920878	0.118981	7.39837	1.37864e-13	1.01788e-11	Ybx2	protein_coding
ENSMUSG00000031349	1687.08	1361.74	2012.41	-0.541928	0.0718942	-7.39778	1.38478e-13	1.01843e-11	Nsdhl	protein_coding
ENSMUSG00000034744	1331.42	1096.55	1566.29	-0.507627	0.0683931	-7.35638	1.88967e-13	1.36323e-11	Nagk	protein_coding
ENSMUSG00000043061	2933.85	3398.15	2469.56	0.454053	0.0610235	7.35474	1.91298e-13	1.3748e-11	Tmem18	protein_coding
ENSMUSG00000025920	6150.83	5281.61	7020.05	-0.41309	0.0558957	-7.34888	1.99877e-13	1.43101e-11	Stau2	protein_coding
ENSMUSG00000053411	561.927	706.463	417.392	0.72593	0.10018	7.33311	2.24866e-13	1.59782e-11	Cbx7	protein_coding
ENSMUSG00000031391	12738.5	9153.67	16323.4	-0.766346	0.101409	-7.31726	2.53084e-13	1.79159e-11	L1cam	protein_coding
ENSMUSG00000037788	7040.35	6182.82	7897.88	-0.357187	0.0486704	-7.30258	2.82306e-13	1.99099e-11	Vopp1	protein_coding
ENSMUSG00000026837	2353.66	1878.44	2828.88	-0.564585	0.0757312	-7.29805	2.91963e-13	2.05145e-11	Col5a1	protein_coding
ENSMUSG00000038943	281.8	197.134	366.467	-0.813948	0.108911	-7.2836	3.25036e-13	2.25037e-11	Prc1	protein_coding
ENSMUSG00000057411	1199.53	1412.56	986.498	0.499912	0.0675852	7.2481	4.22647e-13	2.89437e-11	Fam173a	protein_coding
ENSMUSG00000038524	579.786	425.102	734.47	-0.738641	0.10117	-7.24063	4.4659e-13	3.04729e-11	Fchsd1	protein_coding
ENSMUSG00000024664	1632.33	1308.1	1956.56	-0.561295	0.0764662	-7.235	4.65518e-13	3.15368e-11	Fads3	protein_coding
ENSMUSG00000026688	3284.38	2719.5	3849.26	-0.500266	0.0688581	-7.23507	4.65278e-13	3.15368e-11	Mgst3	protein_coding
ENSMUSG00000052906	930.42	1124.55	736.285	0.579219	0.077916	7.22049	5.17993e-13	3.48419e-11	Ubxn8	protein_coding
ENSMUSG00000027306	192.696	128.214	257.178	-0.893969	0.122062	-7.20869	5.64947e-13	3.78654e-11	Nusap1	protein_coding
ENSMUSG00000018965	14338.1	11764.7	16911.5	-0.499702	0.0678434	-7.20286	5.89621e-13	3.93796e-11	Ywhah	protein_coding
ENSMUSG00000037419	2139.77	1835.62	2443.91	-0.405593	0.0556394	-7.19871	6.07868e-13	4.04553e-11	Endod1	protein_coding
ENSMUSG00000018567	4717.54	3956.95	5478.12	-0.460428	0.0632639	-7.18921	6.51683e-13	4.32191e-11	Gabarap	protein_coding
ENSMUSG00000031970	487.853	356.4	619.307	-0.741689	0.101815	-7.17962	6.99056e-13	4.60378e-11	Dbndd1	protein_coding
ENSMUSG00000031993	3387.81	3977.32	2798.3	0.493433	0.0680331	7.14554	8.96414e-13	5.86267e-11	Snx19	protein_coding
ENSMUSG00000015377	2790.42	3234.32	2346.53	0.471802	0.0662714	7.13265	9.84526e-13	6.41673e-11	Dennd6b	protein_coding
ENSMUSG00000017774	1043.91	831.526	1256.29	-0.560087	0.0762855	-7.1279	1.01914e-12	6.61954e-11	Myo1c	protein_coding
ENSMUSG00000031398	2687.2	2068.9	3305.5	-0.640396	0.0884027	-7.11006	1.15989e-12	7.48231e-11	Plxna3	protein_coding
ENSMUSG00000054428	6747.11	5541.43	7952.8	-0.510725	0.0711643	-7.09644	1.28011e-12	8.17413e-11	Atpif1	protein_coding
ENSMUSG00000025068	1533.82	1285.8	1781.85	-0.467019	0.0652966	-7.0927	1.31524e-12	8.34204e-11	Gsto1	protein_coding
ENSMUSG00000020657	5566	6328.25	4803.75	0.38461	0.0534042	7.0901	1.34018e-12	8.47183e-11	Dnajc27	protein_coding
ENSMUSG00000078815	116.921	165.441	68.4001	1.06107	0.143582	7.0616	1.64598e-12	1.03015e-10	Cacng6	protein_coding
ENSMUSG00000041625	447.143	559.975	334.311	0.69115	0.0949895	7.04966	1.79357e-12	1.11882e-10	Ggact	protein_coding
ENSMUSG00000021268	236754	202218	271291	-0.396914	0.0549641	-7.04907	1.80119e-12	1.11988e-10	Meg3	lincRNA
ENSMUSG00000059013	647.258	485.314	809.202	-0.694961	0.0973206	-7.04847	1.80896e-12	1.12102e-10	Sh2d3c	protein_coding
ENSMUSG00000031604	3964.51	3286.61	4642.41	-0.486283	0.0680684	-7.04477	1.85768e-12	1.14745e-10	Msmo1	protein_coding
ENSMUSG00000028680	663.223	534.848	791.598	-0.551576	0.0774156	-7.04417	1.8657e-12	1.14865e-10	Plk3	protein_coding
ENSMUSG00000027852	4076.43	3421.63	4731.23	-0.469298	0.0664519	-7.03982	1.92489e-12	1.18124e-10	Nras	protein_coding
ENSMUSG00000020905	679.24	484.913	873.566	-0.781006	0.10978	-7.0365	1.97131e-12	1.20582e-10	Usp43	protein_coding
ENSMUSG00000063801	5081.47	5789	4373.93	0.385773	0.0538302	7.02459	2.14695e-12	1.30481e-10	Ap3s2	protein_coding
ENSMUSG00000017929	2431.82	2072.82	2790.82	-0.42622	0.0601978	-7.02106	2.20191e-12	1.33392e-10	B4galt5	protein_coding
ENSMUSG00000005682	1627.22	1916.94	1337.49	0.518205	0.0738542	7.01402	2.31562e-12	1.39387e-10	Pan2	protein_coding
ENSMUSG00000044149	1430.93	1193.63	1668.23	-0.469248	0.0657546	-7.01156	2.35671e-12	1.4141e-10	Nkrf	protein_coding
ENSMUSG00000041313	3551.13	2901.73	4200.53	-0.507001	0.0706047	-7.00411	2.48565e-12	1.48675e-10	Slc7a1	protein_coding
ENSMUSG00000022797	6335.26	5260.77	7409.74	-0.486385	0.0687267	-7.00133	2.53536e-12	1.5117e-10	Tfrc	protein_coding
ENSMUSG00000032135	819.868	649.345	990.39	-0.578379	0.0805458	-6.99372	2.67684e-12	1.59104e-10	Mcam	protein_coding
ENSMUSG00000042506	14097.1	11164.2	17029.9	-0.580939	0.0815067	-6.98674	2.81355e-12	1.66184e-10	Usp22	protein_coding
ENSMUSG00000021773	293.667	211.713	375.621	-0.762266	0.108023	-6.97918	2.96906e-12	1.74823e-10	Comtd1	protein_coding
ENSMUSG00000036104	3727.73	4301.04	3154.41	0.439925	0.0625586	6.95548	3.5136e-12	2.04971e-10	Rab3gap1	protein_coding
ENSMUSG00000030554	2989.65	2420.38	3558.92	-0.533486	0.0753404	-6.94371	3.81922e-12	2.21433e-10	Synm	protein_coding
ENSMUSG00000004961	4743.02	3914.29	5571.75	-0.48655	0.0685721	-6.93822	3.97066e-12	2.29023e-10	Syt5	protein_coding
ENSMUSG00000022346	563.149	428.037	698.261	-0.668419	0.0955474	-6.93531	4.05318e-12	2.32149e-10	Myc	protein_coding
ENSMUSG00000013495	1583.37	1833.08	1333.67	0.454379	0.0649618	6.93376	4.098e-12	2.34007e-10	Tmem175	protein_coding
ENSMUSG00000003814	17184.8	15030.9	19338.8	-0.352891	0.0502249	-6.93125	4.17129e-12	2.36968e-10	Calr	protein_coding
ENSMUSG00000067274	3090.26	2424.14	3756.37	-0.619986	0.0901713	-6.93113	4.17493e-12	2.36968e-10	Rplp0	protein_coding
ENSMUSG00000032418	2175.16	1769.14	2581.19	-0.526558	0.0747962	-6.91938	4.53618e-12	2.56702e-10	Me1	protein_coding
ENSMUSG00000029103	5941.08	6749.63	5132.54	0.378537	0.0537693	6.91407	4.70948e-12	2.65713e-10	Lrpap1	protein_coding
ENSMUSG00000004473	201.82	267.684	135.955	0.8661	0.118534	6.90682	4.95651e-12	2.78819e-10	Clec11a	protein_coding
ENSMUSG00000075316	380.788	257.911	503.666	-0.858388	0.122168	-6.90441	5.04114e-12	2.82738e-10	Scn9a	protein_coding
ENSMUSG00000000392	290.524	380.645	200.404	0.822863	0.113655	6.90009	5.197e-12	2.8976e-10	Fap	protein_coding
ENSMUSG00000027968	876.362	1033.38	719.342	0.505775	0.0719767	6.89453	5.40439e-12	3.00436e-10	Larp7	protein_coding
ENSMUSG00000007655	1075.26	856.347	1294.17	-0.557119	0.0783727	-6.8688	6.47449e-12	3.54708e-10	Cav1	protein_coding
ENSMUSG00000025246	3928.14	3387.7	4468.58	-0.382134	0.0546641	-6.85759	7.00318e-12	3.82564e-10	Tbl1x	protein_coding
ENSMUSG00000009828	2003.8	1678.68	2328.93	-0.465201	0.0671466	-6.85098	7.33438e-12	3.96077e-10	Ick	protein_coding
ENSMUSG00000018909	13672.5	11908	15437	-0.368535	0.0533154	-6.83592	8.14779e-12	4.37504e-10	Arrb1	protein_coding
ENSMUSG00000029208	4777.3	5516.78	4037.82	0.444347	0.0643968	6.82663	8.69304e-12	4.62837e-10	Guf1	protein_coding
ENSMUSG00000033088	835.277	622.115	1048.44	-0.702224	0.101448	-6.82497	8.79441e-12	4.66919e-10	Triobp	protein_coding
ENSMUSG00000024211	619.78	484.091	755.469	-0.606636	0.0869008	-6.77795	1.21895e-11	6.39982e-10	Grm8	protein_coding
ENSMUSG00000050623	223.058	158.465	287.65	-0.78225	0.113187	-6.76844	1.30183e-11	6.74132e-10	Catsperz	protein_coding
ENSMUSG00000037355	1300.08	1518.33	1081.84	0.476217	0.0693159	6.75784	1.4006e-11	7.21329e-10	Uvssa	protein_coding
ENSMUSG00000040044	1835.44	2126.17	1544.71	0.443963	0.0643881	6.75387	1.4395e-11	7.39348e-10	Orc3	protein_coding
ENSMUSG00000035228	1800.65	2090.7	1510.6	0.453605	0.0659701	6.75049	1.47348e-11	7.54752e-10	Ccdc106	protein_coding
ENSMUSG00000049281	8223.61	6910.5	9536.72	-0.443442	0.0642929	-6.74607	1.51907e-11	7.76e-10	Scn3b	protein_coding
ENSMUSG00000001445	1941.19	2239.81	1642.57	0.427823	0.0620127	6.7451	1.52926e-11	7.79096e-10	Mrpl10	protein_coding
ENSMUSG00000035653	3476.87	2988.02	3965.72	-0.409605	0.0604782	-6.73529	1.63602e-11	8.31094e-10	Lrfn5	protein_coding
ENSMUSG00000036099	4360.89	3792.18	4929.6	-0.370268	0.0542754	-6.73493	1.64011e-11	8.31094e-10	Vezt	protein_coding
ENSMUSG00000030706	1139.44	1345.52	933.361	0.506301	0.0737727	6.71896	1.83023e-11	9.22484e-10	Mrpl48	protein_coding
ENSMUSG00000018411	29464	23107.5	35820.6	-0.599236	0.0873937	-6.71565	1.87234e-11	9.41199e-10	Mapt	protein_coding
ENSMUSG00000033952	196.965	136.836	257.094	-0.81655	0.120476	-6.69382	2.17426e-11	1.08432e-09	Aspm	protein_coding
ENSMUSG00000041220	3578.38	3056.73	4100.03	-0.411443	0.0605097	-6.68913	2.24494e-11	1.11662e-09	Elovl6	protein_coding
ENSMUSG00000103310	332.3	231.319	433.281	-0.810798	0.117946	-6.68655	2.28488e-11	1.13351e-09	Pcdha12	protein_coding
ENSMUSG00000032402	1252.74	1495.47	1010.01	0.55351	0.0826357	6.68182	2.35986e-11	1.16459e-09	Smad3	protein_coding
ENSMUSG00000037656	2169.56	2506.4	1832.71	0.43798	0.0644712	6.67889	2.40754e-11	1.18195e-09	Slc20a2	protein_coding
ENSMUSG00000036533	828.479	685.252	971.705	-0.493898	0.073269	-6.67083	2.54353e-11	1.24547e-09	Cdc42ep3	protein_coding
ENSMUSG00000070348	1890.62	1518.2	2263.03	-0.550189	0.0809024	-6.66956	2.56566e-11	1.25306e-09	Ccnd1	protein_coding
ENSMUSG00000071657	2365.85	2003.19	2728.51	-0.426184	0.0625294	-6.66694	2.61193e-11	1.27237e-09	Bscl2	protein_coding
ENSMUSG00000032648	668.727	833.761	503.693	0.666907	0.0966751	6.66141	2.7121e-11	1.31778e-09	Pygm	protein_coding
ENSMUSG00000021486	2234.28	1922.73	2545.83	-0.403732	0.0601998	-6.65358	2.86047e-11	1.3863e-09	Prelid1	protein_coding
ENSMUSG00000027884	1058.03	1243.57	872.488	0.493719	0.0729181	6.65165	2.89818e-11	1.39783e-09	Clcc1	protein_coding
ENSMUSG00000028693	3180.44	2639.2	3721.68	-0.485466	0.0722373	-6.65161	2.89904e-11	1.39783e-09	Nasp	protein_coding
ENSMUSG00000027199	3973.76	3415.96	4531.57	-0.412123	0.0618333	-6.64741	2.98288e-11	1.43459e-09	Gatm	protein_coding
ENSMUSG00000022672	1705.1	1948.49	1461.7	0.412267	0.0614993	6.64029	3.13059e-11	1.50181e-09	Prkdc	protein_coding
ENSMUSG00000023004	652.012	498.887	805.138	-0.641076	0.0940237	-6.61369	3.74868e-11	1.77135e-09	Tuba1b	protein_coding
ENSMUSG00000026042	983.016	775.456	1190.58	-0.557006	0.0795692	-6.60868	3.8776e-11	1.82315e-09	Col5a2	protein_coding
ENSMUSG00000036752	4699.4	3897.65	5501.15	-0.483153	0.0722526	-6.59365	4.29137e-11	2.01269e-09	Tubb4b	protein_coding
ENSMUSG00000023192	1611.04	1303.32	1918.76	-0.512226	0.0744693	-6.58493	4.55112e-11	2.12397e-09	Grm2	protein_coding
ENSMUSG00000009376	2640.31	2018.19	3262.43	-0.658721	0.100043	-6.57853	4.75117e-11	2.20643e-09	Met	protein_coding
ENSMUSG00000019370	68116.8	56560.8	79672.8	-0.478602	0.07166	-6.5739	4.90149e-11	2.27066e-09	Calm3	protein_coding
ENSMUSG00000030323	1839.68	2189.34	1490.01	0.534914	0.0803138	6.56868	5.07637e-11	2.34593e-09	Ift122	protein_coding
ENSMUSG00000020601	3858.51	3348.56	4368.45	-0.370534	0.0555651	-6.56057	5.36038e-11	2.47114e-09	Trib2	protein_coding
ENSMUSG00000027332	2094.03	2575.04	1613.01	0.636403	0.0954287	6.55963	5.39415e-11	2.47463e-09	Ivd	protein_coding
ENSMUSG00000030401	3908.78	3290.42	4527.13	-0.456153	0.0690701	-6.55851	5.43487e-11	2.48727e-09	Rtn2	protein_coding
ENSMUSG00000032026	2318.65	1950.6	2686.7	-0.448362	0.0673081	-6.55188	5.6817e-11	2.5877e-09	Rexo2	protein_coding
ENSMUSG00000030357	3968.06	3383.8	4552.32	-0.415889	0.0626203	-6.54013	6.14649e-11	2.7793e-09	Fkbp4	protein_coding
ENSMUSG00000032047	6483.6	5673.78	7293.42	-0.367466	0.0559865	-6.54041	6.13507e-11	2.7793e-09	Acat1	protein_coding
ENSMUSG00000023019	1401.4	1761.87	1040.94	0.694067	0.102763	6.5386	6.20965e-11	2.80116e-09	Gpd1	protein_coding
ENSMUSG00000029482	2933.86	2409.46	3458.26	-0.492544	0.0733455	-6.53658	6.29421e-11	2.83254e-09	Aacs	protein_coding
ENSMUSG00000039577	698.889	837.868	559.91	0.567445	0.0871858	6.52322	6.88123e-11	3.08204e-09	Nphp4	protein_coding
ENSMUSG00000032534	1290.97	1498.01	1083.94	0.450954	0.0678022	6.52122	6.97388e-11	3.10881e-09	Cep63	protein_coding
ENSMUSG00000020170	2596.7	3020.03	2173.37	0.458048	0.0690454	6.51499	7.26959e-11	3.233e-09	Frs2	protein_coding
ENSMUSG00000029449	1514.32	1261.78	1766.87	-0.471597	0.0713797	-6.51404	7.31569e-11	3.24587e-09	Rhof	protein_coding
ENSMUSG00000031910	315.735	236.542	394.928	-0.683312	0.101818	-6.508	7.61582e-11	3.37112e-09	Has3	protein_coding
ENSMUSG00000047986	256.242	169.755	342.729	-0.872077	0.128094	-6.50352	7.84624e-11	3.45692e-09	Palm3	protein_coding
ENSMUSG00000020277	4510.87	5309.59	3712.15	0.514285	0.0795621	6.49822	8.12755e-11	3.57253e-09	Pfkl	protein_coding
ENSMUSG00000001552	1153.9	931.924	1375.87	-0.523607	0.0777315	-6.49485	8.31171e-11	3.62817e-09	Jup	protein_coding
ENSMUSG00000023951	3318.18	2809.84	3826.51	-0.437514	0.0666668	-6.48909	8.63563e-11	3.76088e-09	Vegfa	protein_coding
ENSMUSG00000020475	195.923	267.388	124.459	0.927259	0.139509	6.48774	8.7135e-11	3.77738e-09	Pgam2	protein_coding
ENSMUSG00000027577	1511.32	1258.43	1764.22	-0.478755	0.0731364	-6.48606	8.81074e-11	3.81079e-09	Chrna4	protein_coding
ENSMUSG00000049511	552.082	412.515	691.648	-0.691372	0.104358	-6.48242	9.0261e-11	3.87732e-09	Htr1b	protein_coding
ENSMUSG00000037278	281.106	212.996	349.215	-0.670704	0.10328	-6.4661	1.00566e-10	4.27145e-09	Tmem97	protein_coding
ENSMUSG00000025170	1166.35	1375.58	957.12	0.516314	0.0800053	6.46023	1.04542e-10	4.43039e-09	Rab40b	protein_coding
ENSMUSG00000093904	10793.5	12199.2	9387.8	0.36325	0.0553178	6.45017	1.11725e-10	4.70317e-09	Tomm20	protein_coding
ENSMUSG00000021957	5077.49	4349.4	5805.58	-0.408939	0.0626736	-6.44938	1.1231e-10	4.71727e-09	Tkt	protein_coding
ENSMUSG00000049807	4575.31	3898.71	5251.9	-0.425007	0.065346	-6.44713	1.1399e-10	4.7772e-09	Arhgap23	protein_coding
ENSMUSG00000044442	1565.28	1817	1313.56	0.435063	0.0651844	6.44414	1.16259e-10	4.85078e-09	N6amt1	protein_coding
ENSMUSG00000035189	1051.55	873.556	1229.54	-0.48786	0.0753487	-6.44267	1.17389e-10	4.88715e-09	Ano4	protein_coding
ENSMUSG00000082229	3275.74	2868.9	3682.58	-0.362129	0.0558973	-6.43857	1.20604e-10	5.00995e-09	Nap1l2	protein_coding
ENSMUSG00000022389	10001.3	11180	8822.69	0.342061	0.0529391	6.41731	1.38699e-10	5.73644e-09	Tef	protein_coding
ENSMUSG00000030753	4970.05	5747.01	4193.09	0.427266	0.0646963	6.41433	1.41441e-10	5.81168e-09	Thap12	protein_coding
ENSMUSG00000051098	2229.48	1867.79	2591.18	-0.462272	0.0714516	-6.39792	1.57504e-10	6.40213e-09	Mblac2	protein_coding
ENSMUSG00000040339	4667.24	4110.17	5224.32	-0.352207	0.0549959	-6.38473	1.71704e-10	6.91979e-09	Fam102b	protein_coding
ENSMUSG00000002812	1775.29	1442.47	2108.1	-0.509759	0.0771335	-6.38062	1.76367e-10	7.09257e-09	Flii	protein_coding
ENSMUSG00000027522	3062.47	3457.69	2667.26	0.366562	0.0566993	6.38019	1.76866e-10	7.09755e-09	Stx16	protein_coding
ENSMUSG00000043857	3458.9	2842.29	4075.51	-0.500061	0.0771064	-6.37574	1.82086e-10	7.29154e-09	Mgat5b	protein_coding
ENSMUSG00000052560	1705.72	1403.42	2008.01	-0.493531	0.0758033	-6.37316	1.85168e-10	7.39927e-09	Cpne8	protein_coding
ENSMUSG00000001034	1561.79	1271.65	1851.93	-0.526292	0.0821262	-6.3617	1.9953e-10	7.95634e-09	Mapk7	protein_coding
ENSMUSG00000032657	1637.76	1384.8	1890.73	-0.430679	0.06634	-6.34993	2.15408e-10	8.55342e-09	Fam189b	protein_coding
ENSMUSG00000025287	669.4	538.435	800.366	-0.551012	0.0856243	-6.34251	2.26053e-10	8.95728e-09	Acot9	protein_coding
ENSMUSG00000023904	2992.3	2582.35	3402.25	-0.398602	0.0625721	-6.33867	2.31754e-10	9.16397e-09	Hcfc1r1	protein_coding
ENSMUSG00000029625	2039	2349.56	1728.45	0.425901	0.0658085	6.33612	2.35616e-10	9.29724e-09	Cpsf4	protein_coding
ENSMUSG00000026017	1326.53	1549.08	1103.97	0.46306	0.0710026	6.33495	2.37423e-10	9.34904e-09	Carf	protein_coding
ENSMUSG00000044433	1745.8	1396.06	2095.54	-0.55344	0.085412	-6.33452	2.38079e-10	9.35536e-09	Camsap3	protein_coding
ENSMUSG00000035311	5769.18	5020.32	6518.04	-0.382306	0.0602472	-6.33336	2.39879e-10	9.40652e-09	Gnptab	protein_coding
ENSMUSG00000054459	16013.9	13748.9	18278.9	-0.405915	0.0635741	-6.32296	2.56592e-10	1.00203e-08	Vsnl1	protein_coding
ENSMUSG00000054752	2319.22	1954.92	2683.53	-0.448359	0.0702906	-6.31174	2.75908e-10	1.07524e-08	Fsd1l	protein_coding
ENSMUSG00000049225	2322.47	1996.07	2648.86	-0.393952	0.0612885	-6.3039	2.90257e-10	1.12884e-08	Pdp1	protein_coding
ENSMUSG00000029500	3088.71	3487.26	2690.16	0.365067	0.0571512	6.29558	3.06248e-10	1.18858e-08	Pgam5	protein_coding
ENSMUSG00000021998	448.636	347.301	549.972	-0.60768	0.0922789	-6.29276	3.11875e-10	1.20794e-08	Lcp1	protein_coding
ENSMUSG00000014444	876.099	701.254	1050.94	-0.545628	0.083975	-6.28983	3.17805e-10	1.22589e-08	Piezo1	protein_coding
ENSMUSG00000024590	845.546	676.383	1014.71	-0.544093	0.0836697	-6.27535	3.48839e-10	1.33741e-08	Lmnb1	protein_coding
ENSMUSG00000023456	9728.62	8416.61	11040.6	-0.385827	0.0608328	-6.27477	3.50151e-10	1.33972e-08	Tpi1	protein_coding
ENSMUSG00000044365	2737.64	2353.5	3121.78	-0.408001	0.0648155	-6.26452	3.7398e-10	1.42512e-08	Cxxc4	protein_coding
ENSMUSG00000042055	2589.12	2976.2	2202.04	0.426742	0.0673964	6.25874	3.88111e-10	1.46714e-08	Wdr11	protein_coding
ENSMUSG00000029471	11908.6	10557.5	13259.6	-0.326201	0.0518271	-6.23662	4.47136e-10	1.68353e-08	Camkk2	protein_coding
ENSMUSG00000038208	434.274	524.22	344.328	0.583233	0.0933128	6.23024	4.65734e-10	1.74314e-08	Pgap3	protein_coding
ENSMUSG00000026074	9336.12	8217.88	10454.4	-0.338459	0.0536257	-6.22684	4.7594e-10	1.77781e-08	Map4k4	protein_coding
ENSMUSG00000039474	3630.16	4351	2909.32	0.562688	0.0904309	6.22145	4.92567e-10	1.83268e-08	Wfs1	protein_coding
ENSMUSG00000021179	672.08	787.206	556.955	0.48594	0.076959	6.21586	5.10448e-10	1.89548e-08	Nrde2	protein_coding
ENSMUSG00000028149	14674	12733.9	16614.1	-0.375134	0.05957	-6.21164	5.24349e-10	1.94328e-08	Rap1gds1	protein_coding
ENSMUSG00000034226	425.089	327.973	522.205	-0.628016	0.0999112	-6.20738	5.38766e-10	1.98891e-08	Rhov	protein_coding
ENSMUSG00000041216	2362.75	2027.76	2697.75	-0.391029	0.0615799	-6.1939	5.86924e-10	2.16247e-08	Clvs1	protein_coding
ENSMUSG00000031641	838.07	996.205	679.934	0.5234	0.0825972	6.19002	6.01547e-10	2.20774e-08	Cbr4	protein_coding
ENSMUSG00000022946	3031.47	2543.17	3519.77	-0.445381	0.0701901	-6.18865	6.06817e-10	2.22276e-08	Dopey2	protein_coding
ENSMUSG00000003410	13505.2	11569.8	15440.6	-0.392792	0.0619922	-6.1776	6.50841e-10	2.37481e-08	Elavl3	protein_coding
ENSMUSG00000022420	1113.64	1281.54	945.742	0.425729	0.0679264	6.16934	6.85768e-10	2.49263e-08	Dnal4	protein_coding
ENSMUSG00000005674	1999.81	1661.72	2337.89	-0.48578	0.0785013	-6.16706	6.95697e-10	2.51903e-08	Tomm40l	protein_coding
ENSMUSG00000042406	4351.12	3784.35	4917.89	-0.371582	0.0595729	-6.16362	7.11008e-10	2.56955e-08	Atf4	protein_coding
ENSMUSG00000063439	653.37	779.426	527.315	0.525035	0.0819916	6.16175	7.19443e-10	2.59508e-08	B9d2	protein_coding
ENSMUSG00000031422	6000.99	5304.14	6697.84	-0.338	0.0545576	-6.15824	7.35569e-10	2.64819e-08	Morf4l2	protein_coding
ENSMUSG00000023150	9654.55	8386.91	10922.2	-0.380682	0.0613986	-6.15692	7.41732e-10	2.6653e-08	Ivns1abp	protein_coding
ENSMUSG00000065979	1816.04	2104.41	1527.67	0.440103	0.0699821	6.14646	7.92318e-10	2.83093e-08	Cpped1	protein_coding
ENSMUSG00000059278	1067.06	1305.27	828.849	0.596818	0.0925801	6.1325	8.65091e-10	3.08511e-08	Naa38	protein_coding
ENSMUSG00000061981	5856.16	5056.23	6656.09	-0.382792	0.0613424	-6.13025	8.77394e-10	3.12309e-08	Flot2	protein_coding
ENSMUSG00000026773	1213.59	1016.28	1410.9	-0.44725	0.071005	-6.12375	9.13994e-10	3.24726e-08	Pfkfb3	protein_coding
ENSMUSG00000021262	7015.98	6145.45	7886.51	-0.36705	0.0599772	-6.11929	9.39916e-10	3.33309e-08	Evl	protein_coding
ENSMUSG00000036578	3393.45	2802.19	3984.7	-0.483936	0.0773837	-6.1129	9.78342e-10	3.46286e-08	Fxyd7	protein_coding
ENSMUSG00000060224	396.68	503.258	290.102	0.72268	0.117727	6.11129	9.8827e-10	3.49146e-08	Pyroxd2	protein_coding
ENSMUSG00000059970	1331.3	1579.98	1082.63	0.54583	0.0918558	6.10816	1.00786e-09	3.55403e-08	Hspa2	protein_coding
ENSMUSG00000024414	880.298	1032.4	728.192	0.481059	0.076798	6.10605	1.02124e-09	3.5945e-08	Mrpl27	protein_coding
ENSMUSG00000047989	1358.05	1576.76	1139.34	0.444287	0.0706693	6.10494	1.02841e-09	3.61301e-08	Ino80c	protein_coding
ENSMUSG00000018572	1468.42	1218.84	1718	-0.465386	0.0739516	-6.1019	1.04817e-09	3.6756e-08	Phf23	protein_coding
ENSMUSG00000025241	3099.73	3508.28	2691.18	0.386246	0.063418	6.07672	1.22662e-09	4.28547e-08	Fyco1	protein_coding
ENSMUSG00000024378	2246.11	1915.1	2577.12	-0.424198	0.0692729	-6.07509	1.23919e-09	4.32139e-08	Stard4	protein_coding
ENSMUSG00000020828	1445.01	1226.54	1663.49	-0.427921	0.0694795	-6.06907	1.28654e-09	4.47824e-08	Pld2	protein_coding
ENSMUSG00000001248	5476.44	4667.78	6285.1	-0.412511	0.066805	-6.05819	1.37662e-09	4.76549e-08	Gramd1a	protein_coding
ENSMUSG00000059674	649.693	513.088	786.299	-0.577361	0.0933634	-6.05837	1.37505e-09	4.76549e-08	Cdh24	protein_coding
ENSMUSG00000040359	1764.81	2018.92	1510.7	0.394818	0.063442	6.05401	1.41286e-09	4.88199e-08	Ufl1	protein_coding
ENSMUSG00000055436	10884.3	12217.4	9551.13	0.355263	0.0583319	6.0465	1.48026e-09	5.10553e-08	Srsf11	protein_coding
ENSMUSG00000004451	1189.1	1019.82	1358.38	-0.398777	0.0647241	-6.04133	1.52844e-09	5.26214e-08	Ralb	protein_coding
ENSMUSG00000044835	2176.59	1874.31	2478.88	-0.397197	0.0650227	-6.03891	1.55157e-09	5.33205e-08	Ankrd45	protein_coding
ENSMUSG00000022099	11596.8	10007.7	13185.8	-0.384332	0.0625991	-6.03435	1.59606e-09	5.46506e-08	Dmtn	protein_coding
ENSMUSG00000067873	4472.59	4952.1	3993.08	0.313605	0.051679	6.03247	1.61468e-09	5.51882e-08	Htatsf1	protein_coding
ENSMUSG00000052727	55336.6	43937.7	66735.5	-0.559504	0.0896558	-6.02875	1.6523e-09	5.61692e-08	Map1b	protein_coding
ENSMUSG00000054720	1145.45	946.217	1344.67	-0.479104	0.0771441	-6.02882	1.65164e-09	5.61692e-08	Lrrc8c	protein_coding
ENSMUSG00000059995	7822.57	6846.21	8798.92	-0.361645	0.0596042	-6.02662	1.67425e-09	5.67114e-08	Atxn7l3	protein_coding
ENSMUSG00000041439	3611.13	3059.91	4162.35	-0.433308	0.0710076	-6.02362	1.70559e-09	5.76697e-08	Mfsd6	protein_coding
ENSMUSG00000024539	1432.88	1656.94	1208.82	0.442079	0.0727434	5.99437	2.04273e-09	6.82149e-08	Ptpn2	protein_coding
ENSMUSG00000005873	17914.9	15798.2	20031.6	-0.343401	0.0569503	-5.99121	2.08282e-09	6.93089e-08	Reep5	protein_coding
ENSMUSG00000022443	2585.11	2109.69	3060.53	-0.480822	0.0760049	-5.97198	2.34384e-09	7.7721e-08	Myh9	protein_coding
ENSMUSG00000008206	3186.44	2666.33	3706.55	-0.461735	0.0764452	-5.96791	2.40319e-09	7.95493e-08	Cers4	protein_coding
ENSMUSG00000052395	606.043	722.984	489.102	0.523405	0.0844385	5.95691	2.57055e-09	8.43506e-08	Rft1	protein_coding
ENSMUSG00000019923	24565.2	21848.7	27281.6	-0.310487	0.0514072	-5.95461	2.60689e-09	8.5395e-08	Zwint	protein_coding
ENSMUSG00000009739	5510.65	6292.08	4729.22	0.413916	0.0694916	5.94581	2.75097e-09	8.99586e-08	Pou6f1	protein_coding
ENSMUSG00000020289	1347.91	1537.49	1158.33	0.401631	0.0667397	5.94429	2.77656e-09	9.06387e-08	Nprl3	protein_coding
ENSMUSG00000063506	264.922	192.471	337.372	-0.725682	0.12105	-5.94313	2.79626e-09	9.11242e-08	Arhgap22	protein_coding
ENSMUSG00000000378	1499.83	1259.66	1739.99	-0.454255	0.0755842	-5.93862	2.87428e-09	9.3493e-08	Ccm2	protein_coding
ENSMUSG00000031907	1098.05	941.546	1254.56	-0.417653	0.0705283	-5.93836	2.87884e-09	9.3493e-08	Zfp90	protein_coding
ENSMUSG00000041774	610.349	476.113	744.585	-0.604643	0.100861	-5.93773	2.88991e-09	9.36914e-08	Ydjc	protein_coding
ENSMUSG00000068923	24291.2	21542.4	27040	-0.317391	0.0526694	-5.93681	2.90626e-09	9.40604e-08	Syt11	protein_coding
ENSMUSG00000096199	662.313	789.387	535.238	0.520916	0.0847858	5.93191	2.99436e-09	9.6746e-08	Ptrhd1	protein_coding
ENSMUSG00000030584	2250.72	1916.17	2585.26	-0.40717	0.0667625	-5.93154	3.00109e-09	9.67981e-08	Dpf1	protein_coding
ENSMUSG00000078202	1480.5	1259.51	1701.48	-0.429207	0.0720506	-5.92434	3.13556e-09	1.00963e-07	Nrarp	protein_coding
ENSMUSG00000020451	6215.44	5498.29	6932.59	-0.338669	0.0570098	-5.92153	3.18958e-09	1.02528e-07	Limk2	protein_coding
ENSMUSG00000014554	628.062	738.95	517.175	0.492244	0.0817051	5.91839	3.25116e-09	1.03977e-07	Dguok	protein_coding
ENSMUSG00000020604	302.542	377.625	227.459	0.659906	0.105581	5.913	3.35939e-09	1.07076e-07	Arsg	protein_coding
ENSMUSG00000001473	177.046	123.856	230.236	-0.777916	0.123774	-5.90945	3.43246e-09	1.09199e-07	Tubb6	protein_coding
ENSMUSG00000038569	350.046	424.301	275.791	0.584737	0.0969491	5.90921	3.43757e-09	1.09199e-07	Rad9b	protein_coding
ENSMUSG00000028048	1408.03	1215.36	1600.71	-0.393857	0.0661781	-5.90479	3.53094e-09	1.11977e-07	Gba	protein_coding
ENSMUSG00000019927	2884.95	2537.57	3232.33	-0.342302	0.057285	-5.90111	3.61062e-09	1.14312e-07	Ube2d1	protein_coding
ENSMUSG00000029119	801.579	959.376	643.782	0.542828	0.0900169	5.89968	3.64199e-09	1.15113e-07	Man2b2	protein_coding
ENSMUSG00000029674	2695.78	2362.76	3028.8	-0.355225	0.0596689	-5.89812	3.67673e-09	1.16016e-07	Limk1	protein_coding
ENSMUSG00000026792	1150.04	980.314	1319.76	-0.415624	0.0693921	-5.89406	3.7682e-09	1.18507e-07	Lrsam1	protein_coding
ENSMUSG00000052751	953.926	1106.3	801.553	0.463464	0.0788241	5.8921	3.81323e-09	1.19526e-07	Repin1	protein_coding
ENSMUSG00000005442	8943.43	7864.82	10022	-0.347948	0.0586324	-5.88765	3.91734e-09	1.22383e-07	Cic	protein_coding
ENSMUSG00000000056	2967.35	2579.01	3355.69	-0.370465	0.0620363	-5.88475	3.98656e-09	1.2434e-07	Narf	protein_coding
ENSMUSG00000055862	1111.98	882.658	1341.3	-0.56527	0.0940013	-5.88089	4.08059e-09	1.26646e-07	Izumo4	protein_coding
ENSMUSG00000031134	3467.99	3036.07	3899.91	-0.343386	0.0571374	-5.88006	4.10125e-09	1.27078e-07	Rbmx	protein_coding
ENSMUSG00000029089	557.472	664.62	450.324	0.527752	0.0871381	5.87442	4.24335e-09	1.31052e-07	Pacrgl	protein_coding
ENSMUSG00000029469	1710.6	1949.63	1471.58	0.395128	0.0662088	5.86943	4.37297e-09	1.34396e-07	Ift81	protein_coding
ENSMUSG00000035051	3494.08	3070.77	3917.38	-0.345029	0.0581395	-5.86399	4.51873e-09	1.38425e-07	Dhx57	protein_coding
ENSMUSG00000041921	1239.57	1421.37	1057.77	0.414201	0.0695653	5.86	4.62868e-09	1.41564e-07	Metap1d	protein_coding
ENSMUSG00000008226	1069.82	1260.52	879.127	0.489208	0.0811711	5.85922	4.65037e-09	1.41998e-07	Scrn3	protein_coding
ENSMUSG00000005986	2603.79	2224.35	2983.23	-0.407513	0.0682703	-5.85876	4.66337e-09	1.42165e-07	Ankrd13d	protein_coding
ENSMUSG00000029832	254.172	191.535	316.808	-0.661523	0.110001	-5.85794	4.68651e-09	1.4264e-07	Nfe2l3	protein_coding
ENSMUSG00000025085	7501.83	6591.53	8412.13	-0.344523	0.0580828	-5.85637	4.7308e-09	1.43757e-07	Ablim1	protein_coding
ENSMUSG00000016253	2112.71	2437.43	1787.99	0.437272	0.0738546	5.85323	4.82118e-09	1.46268e-07	Nelfcd	protein_coding
ENSMUSG00000074794	1432.09	1226.7	1637.48	-0.413549	0.0702922	-5.84805	4.97378e-09	1.50656e-07	Arrdc3	protein_coding
ENSMUSG00000028822	2641.12	2279.37	3002.88	-0.396444	0.0674595	-5.84517	5.0605e-09	1.52307e-07	Tmem50a	protein_coding
ENSMUSG00000030533	1213.64	1043.52	1383.76	-0.40731	0.0696475	-5.83834	5.2722e-09	1.58172e-07	Unc45a	protein_coding
ENSMUSG00000037787	1123.75	1317.67	929.82	0.467932	0.0771072	5.83808	5.28049e-09	1.58172e-07	Apopt1	protein_coding
ENSMUSG00000015002	5009.59	5670.53	4348.65	0.373463	0.0631921	5.82591	5.68038e-09	1.69345e-07	Efr3a	protein_coding
ENSMUSG00000028944	3777.4	3346.55	4208.25	-0.325109	0.0551755	-5.82292	5.7828e-09	1.71856e-07	Prkag2	protein_coding
ENSMUSG00000019467	3362.78	3855.72	2869.85	0.434703	0.0756003	5.81808	5.95272e-09	1.76628e-07	Arhgef25	protein_coding
ENSMUSG00000037973	164.971	218.7	111.241	0.82417	0.13082	5.81246	6.15604e-09	1.8209e-07	Ccdc129	protein_coding
ENSMUSG00000057335	7048.92	6008.03	8089.82	-0.416987	0.0706852	-5.8118	6.18045e-09	1.82526e-07	Cep170	protein_coding
ENSMUSG00000037995	576.886	453.651	700.122	-0.587935	0.100736	-5.81139	6.1957e-09	1.82691e-07	Igsf9	protein_coding
ENSMUSG00000029622	660.611	535.133	786.089	-0.538738	0.0930223	-5.80961	6.26175e-09	1.84351e-07	Arpc1b	protein_coding
ENSMUSG00000027499	19227.2	16242.2	22212.1	-0.450482	0.0777322	-5.80177	6.56186e-09	1.92288e-07	Pkia	protein_coding
ENSMUSG00000021033	2390.95	2700.15	2081.75	0.37463	0.0641344	5.79875	6.68099e-09	1.95476e-07	Gstz1	protein_coding
ENSMUSG00000040365	2073.28	2343.06	1803.5	0.374943	0.0640824	5.79661	6.76695e-09	1.9738e-07	Trim41	protein_coding
ENSMUSG00000033307	878.468	736.818	1020.12	-0.45926	0.0788595	-5.78708	7.16225e-09	2.08588e-07	Mif	protein_coding
ENSMUSG00000020628	2202.1	2493.05	1911.15	0.374191	0.0638591	5.77761	7.57709e-09	2.19992e-07	Trappc12	protein_coding
ENSMUSG00000050373	1249.08	1069.86	1428.31	-0.405825	0.0693304	-5.77179	7.84336e-09	2.27373e-07	Snx21	protein_coding
ENSMUSG00000022580	398.501	478.308	318.695	0.557073	0.0954575	5.76838	8.00356e-09	2.31662e-07	Rhpn1	protein_coding
ENSMUSG00000040459	10920.3	12227.6	9613.09	0.345669	0.0594375	5.76812	8.01589e-09	2.31664e-07	Arglu1	protein_coding
ENSMUSG00000032271	110.395	70.4453	150.345	-0.881765	0.151041	-5.76722	8.05908e-09	2.32557e-07	Nnmt	protein_coding
ENSMUSG00000029552	225.817	167.686	283.947	-0.685513	0.119693	-5.75707	8.55882e-09	2.45479e-07	Tes	protein_coding
ENSMUSG00000019998	6861.76	6136.07	7587.45	-0.313918	0.0545605	-5.74686	9.09154e-09	2.59969e-07	Stx7	protein_coding
ENSMUSG00000074227	532.539	656.306	408.772	0.628548	0.105907	5.74649	9.11171e-09	2.60152e-07	Spint2	protein_coding
ENSMUSG00000074001	140.997	186.271	95.7222	0.811908	0.135962	5.73458	9.77539e-09	2.77842e-07	Klhl40	protein_coding
ENSMUSG00000002458	1026.39	850.356	1202.42	-0.480581	0.08268	-5.73363	9.83036e-09	2.78566e-07	Rgs19	protein_coding
ENSMUSG00000038605	868.567	694.148	1042.99	-0.5419	0.0910269	-5.73381	9.81974e-09	2.78566e-07	Samd10	protein_coding
ENSMUSG00000031207	1384.18	1163.86	1604.5	-0.429145	0.0721094	-5.72867	1.01219e-08	2.85542e-07	Msn	protein_coding
ENSMUSG00000024924	6001.33	5328.41	6674.26	-0.31543	0.0542937	-5.72403	1.04024e-08	2.93019e-07	Vldlr	protein_coding
ENSMUSG00000045007	1548.66	1775.5	1321.82	0.410776	0.0704893	5.72125	1.05745e-08	2.97424e-07	Tubg2	protein_coding
ENSMUSG00000051278	492.21	625.623	358.797	0.709458	0.11916	5.71756	1.08064e-08	3.03044e-07	Zgrf1	protein_coding
ENSMUSG00000034349	832.263	682.903	981.624	-0.502802	0.087024	-5.71711	1.0835e-08	3.03397e-07	Smc4	protein_coding
ENSMUSG00000022257	1412.73	1629.01	1196.46	0.433094	0.0749907	5.71419	1.10225e-08	3.08191e-07	Laptm4b	protein_coding
ENSMUSG00000028773	1246.37	1061.14	1431.59	-0.429388	0.0749336	-5.71254	1.113e-08	3.10737e-07	Fabp3	protein_coding
ENSMUSG00000023828	435.615	320.751	550.479	-0.69902	0.121442	-5.71206	1.11619e-08	3.11166e-07	Slc22a3	protein_coding
ENSMUSG00000025037	2478.54	2155.17	2801.92	-0.380616	0.0665262	-5.70872	1.13832e-08	3.16402e-07	Maoa	protein_coding
ENSMUSG00000010554	1200.08	1026.24	1373.93	-0.408007	0.0702872	-5.70454	1.16657e-08	3.23305e-07	Mettl16	protein_coding
ENSMUSG00000027381	464.356	553.307	375.406	0.525031	0.0895578	5.69618	1.2252e-08	3.38065e-07	Bcl2l11	protein_coding
ENSMUSG00000063146	5983.34	5188.42	6778.26	-0.369816	0.0636486	-5.69576	1.22825e-08	3.38413e-07	Clip2	protein_coding
ENSMUSG00000026155	5744.39	5082.82	6405.96	-0.323071	0.0558805	-5.68783	1.28665e-08	3.52961e-07	Smap1	protein_coding
ENSMUSG00000044017	214.472	285.89	143.053	0.8287	0.138868	5.68753	1.28894e-08	3.53075e-07	Adgrd1	protein_coding
ENSMUSG00000051113	187.117	239.336	134.899	0.722465	0.117004	5.6864	1.29744e-08	3.5489e-07	Fam71e1	protein_coding
ENSMUSG00000025555	3694.05	3129.26	4258.84	-0.429439	0.0744484	-5.67775	1.36476e-08	3.71157e-07	Farp1	protein_coding
ENSMUSG00000024976	2771.68	2449.89	3093.48	-0.343215	0.0604232	-5.67496	1.38723e-08	3.76391e-07	Shoc2	protein_coding
ENSMUSG00000055553	883.281	1017.65	748.913	0.423909	0.0731494	5.67486	1.38799e-08	3.76391e-07	Kxd1	protein_coding
ENSMUSG00000004798	7520.22	6723.94	8316.5	-0.314228	0.055324	-5.67424	1.39302e-08	3.77214e-07	Ulk2	protein_coding
ENSMUSG00000032333	2396.92	2107.24	2686.59	-0.357318	0.0631045	-5.67316	1.40188e-08	3.79068e-07	Stoml1	protein_coding
ENSMUSG00000037062	7789.24	6795.54	8782.94	-0.369321	0.0647888	-5.66432	1.47609e-08	3.98565e-07	Sh3glb1	protein_coding
ENSMUSG00000040174	492.195	583.479	400.912	0.510845	0.0877149	5.66002	1.51356e-08	4.07118e-07	Alkbh3	protein_coding
ENSMUSG00000035131	1766.83	1519.95	2013.7	-0.404086	0.0711279	-5.65936	1.51937e-08	4.07921e-07	Brinp3	protein_coding
ENSMUSG00000022816	2744.35	2309.57	3179.13	-0.436753	0.0752619	-5.65068	1.59811e-08	4.27241e-07	Fstl1	protein_coding
ENSMUSG00000025544	4816.54	5372.82	4260.26	0.33307	0.0585075	5.64847	1.61882e-08	4.32166e-07	Tm9sf2	protein_coding
ENSMUSG00000023909	1996.51	1700.61	2292.42	-0.415768	0.072371	-5.64148	1.68599e-08	4.48198e-07	Paqr4	protein_coding
ENSMUSG00000022159	1939.64	2180.33	1698.95	0.353	0.0617685	5.63523	1.74827e-08	4.63451e-07	Rab2b	protein_coding
ENSMUSG00000040396	3124.02	3478.92	2769.12	0.321088	0.0562508	5.62647	1.8394e-08	4.86925e-07	Abhd13	protein_coding
ENSMUSG00000000555	351.599	262.141	441.057	-0.671697	0.113782	-5.62376	1.86848e-08	4.93931e-07	Itga5	protein_coding
ENSMUSG00000021311	1695.75	1923.21	1468.28	0.383954	0.0675991	5.61908	1.91981e-08	5.06085e-07	Mtr	protein_coding
ENSMUSG00000031906	6075.18	5134.97	7015.4	-0.432034	0.0754103	-5.61775	1.93458e-08	5.0927e-07	Smpd3	protein_coding
ENSMUSG00000026455	1942.75	2199.12	1686.38	0.376867	0.0664509	5.61391	1.9781e-08	5.2e-07	Klhl12	protein_coding
ENSMUSG00000031149	1187.7	1029.17	1346.22	-0.388116	0.0688443	-5.6129	1.9896e-08	5.22298e-07	Praf2	protein_coding
ENSMUSG00000022295	8926.61	10019.7	7833.54	0.353473	0.0625669	5.6101	2.02207e-08	5.2935e-07	Atp6v1c1	protein_coding
ENSMUSG00000026796	1026.36	851.379	1201.34	-0.468031	0.0812122	-5.60778	2.04934e-08	5.35748e-07	Fam129b	protein_coding
ENSMUSG00000001098	1699.57	1462.26	1936.87	-0.385391	0.0670129	-5.60458	2.08759e-08	5.44241e-07	Kctd10	protein_coding
ENSMUSG00000009555	2211.81	2550.06	1873.55	0.434255	0.0767984	5.60425	2.09163e-08	5.44544e-07	Cdk9	protein_coding
ENSMUSG00000013833	1868.83	2153.5	1584.16	0.422291	0.0736291	5.59929	2.15233e-08	5.58807e-07	Med16	protein_coding
ENSMUSG00000021432	857.962	986.727	729.197	0.424713	0.0750752	5.59053	2.26374e-08	5.86926e-07	Slc35b3	protein_coding
ENSMUSG00000028581	806.62	682.23	931.009	-0.433123	0.0760785	-5.58917	2.2816e-08	5.90748e-07	Laptm5	protein_coding
ENSMUSG00000037933	3897.58	3470.47	4324.68	-0.316918	0.0562899	-5.58885	2.28574e-08	5.91009e-07	Bicd2	protein_coding
ENSMUSG00000021360	704.456	581.024	827.887	-0.486612	0.0850937	-5.58833	2.29268e-08	5.91994e-07	Gcnt2	protein_coding
ENSMUSG00000011148	214.144	269.088	159.2	0.676356	0.1182	5.5871	2.30893e-08	5.95377e-07	Adssl1	protein_coding
ENSMUSG00000032565	678.559	792.614	564.505	0.470507	0.0827775	5.58524	2.33375e-08	6.00956e-07	Nudt16	protein_coding
ENSMUSG00000021476	8435.61	9681.88	7189.34	0.41377	0.0728288	5.58288	2.36562e-08	6.07186e-07	Habp4	protein_coding
ENSMUSG00000054383	182.989	133.109	232.869	-0.710569	0.122075	-5.58274	2.36758e-08	6.07186e-07	Pnma1	protein_coding
ENSMUSG00000033623	3857.38	3441.51	4273.25	-0.310985	0.0553136	-5.57398	2.48977e-08	6.31667e-07	Pcgf3	protein_coding
ENSMUSG00000042015	1926.86	2166.04	1687.69	0.349392	0.0617146	5.57251	2.51098e-08	6.36194e-07	Wdr41	protein_coding
ENSMUSG00000004018	487.042	571.705	402.379	0.491932	0.0874449	5.56622	2.60326e-08	6.57811e-07	Fancl	protein_coding
ENSMUSG00000020808	85.5128	53.3786	117.647	-0.895662	0.157533	-5.56283	2.65431e-08	6.67142e-07	Pimreg	protein_coding
ENSMUSG00000031170	394.518	308.745	480.291	-0.572234	0.0965298	-5.56076	2.68609e-08	6.73856e-07	Slc38a5	protein_coding
ENSMUSG00000045095	5732.32	5095.22	6369.42	-0.305737	0.0538784	-5.55896	2.71391e-08	6.79412e-07	Magi1	protein_coding
ENSMUSG00000014077	3152.39	3548.79	2755.98	0.366167	0.0657136	5.55799	2.72902e-08	6.82292e-07	Chp1	protein_coding
ENSMUSG00000022358	514.65	407.66	621.639	-0.572376	0.101583	-5.54996	2.85742e-08	7.13449e-07	Fbxo32	protein_coding
ENSMUSG00000051238	497.135	586.757	407.513	0.486621	0.0838456	5.5492	2.86985e-08	7.15607e-07	Swsap1	protein_coding
ENSMUSG00000026885	833.139	978.634	687.645	0.485505	0.0862542	5.54471	2.94435e-08	7.33217e-07	Ttll11	protein_coding
ENSMUSG00000045348	3882.37	3101.56	4663.19	-0.548256	0.0964898	-5.54367	2.96199e-08	7.36639e-07	Nyap1	protein_coding
ENSMUSG00000004891	993.084	779.029	1207.14	-0.563382	0.0952577	-5.54289	2.97515e-08	7.38939e-07	Nes	protein_coding
ENSMUSG00000025161	187.502	251.438	123.566	0.840589	0.1453	5.54243	2.98299e-08	7.39915e-07	Slc16a3	protein_coding
ENSMUSG00000031647	3129.95	2718.76	3541.15	-0.371123	0.0660291	-5.52944	3.21251e-08	7.94761e-07	Mfap3l	protein_coding
ENSMUSG00000020547	3221.26	2827.28	3615.24	-0.349509	0.0625701	-5.52805	3.23815e-08	8.00056e-07	Bzw2	protein_coding
ENSMUSG00000019810	1893.57	2116.82	1670.32	0.334911	0.0597168	5.5271	3.25576e-08	8.03356e-07	Fuca2	protein_coding
ENSMUSG00000014850	1950.1	2235.33	1664.88	0.400058	0.0702581	5.5147	3.49379e-08	8.57612e-07	Msh3	protein_coding
ENSMUSG00000053137	1257.94	1062.39	1453.49	-0.442372	0.079682	-5.51056	3.57687e-08	8.74597e-07	Mapk11	protein_coding
ENSMUSG00000022537	3506.81	3047.51	3966.1	-0.377306	0.0679738	-5.50857	3.61757e-08	8.83406e-07	Tmem44	protein_coding
ENSMUSG00000041571	24298.8	20841.1	27756.5	-0.408836	0.0738243	-5.50826	3.62394e-08	8.8382e-07	Selenow	protein_coding
ENSMUSG00000005125	818.458	590.236	1046.68	-0.71679	0.122745	-5.50471	3.69769e-08	9.00646e-07	Ndrg1	protein_coding
ENSMUSG00000024150	1613.69	1811.1	1416.29	0.340314	0.0605867	5.49759	3.85019e-08	9.32979e-07	Mcfd2	protein_coding
ENSMUSG00000027531	2898.65	3237.47	2559.84	0.328479	0.0587962	5.49678	3.86786e-08	9.36062e-07	Impa1	protein_coding
ENSMUSG00000048327	215.075	156.696	273.453	-0.706711	0.126248	-5.4963	3.87835e-08	9.37399e-07	Ckap2l	protein_coding
ENSMUSG00000021470	1354.35	1584.48	1124.21	0.463405	0.0813693	5.48992	4.02107e-08	9.69416e-07	Ercc6l2	protein_coding
ENSMUSG00000047417	2848.25	3167.62	2528.89	0.319673	0.0575555	5.4846	4.14409e-08	9.96531e-07	Rexo1	protein_coding
ENSMUSG00000051934	1880.91	2103.58	1658.24	0.339429	0.0613234	5.48278	4.18696e-08	1.00429e-06	Spats2	protein_coding
ENSMUSG00000028069	950.888	774.01	1127.77	-0.501455	0.0880611	-5.48245	4.19478e-08	1.00489e-06	Gpatch4	protein_coding
ENSMUSG00000022462	4132.63	3582.67	4682.6	-0.370331	0.06619	-5.47804	4.30062e-08	1.0272e-06	Slc38a2	protein_coding
ENSMUSG00000028248	14157.8	15541.8	12773.9	0.283902	0.0515121	5.47538	4.36584e-08	1.03875e-06	Pnisr	protein_coding
ENSMUSG00000070705	1377.67	1557.8	1197.53	0.366227	0.065585	5.47524	4.36913e-08	1.03875e-06	Eid2b	protein_coding
ENSMUSG00000040990	2214.02	1908.6	2519.45	-0.381358	0.0679873	-5.47443	4.38932e-08	1.04224e-06	Sh3kbp1	protein_coding
ENSMUSG00000020212	643.798	744.918	542.678	0.439428	0.0785389	5.47322	4.41938e-08	1.04806e-06	Mdm1	protein_coding
ENSMUSG00000040640	12288.4	10862.3	13714.4	-0.339182	0.0617935	-5.46903	4.52503e-08	1.0691e-06	Erc2	protein_coding
ENSMUSG00000074129	553.308	441.871	664.745	-0.550415	0.0988074	-5.46281	4.68658e-08	1.1045e-06	Rpl13a	protein_coding
ENSMUSG00000018340	2781.41	2468.06	3094.75	-0.316583	0.0570379	-5.46119	4.72941e-08	1.11182e-06	Anxa6	protein_coding
ENSMUSG00000029777	5262.04	4734.16	5789.92	-0.285561	0.0517155	-5.459	4.78836e-08	1.12428e-06	Gars	protein_coding
ENSMUSG00000034488	3782.64	3272.06	4293.22	-0.388171	0.0707096	-5.45472	4.90491e-08	1.14737e-06	Edil3	protein_coding
ENSMUSG00000003528	1907.04	1626.97	2187.12	-0.415437	0.0753784	-5.45022	5.03074e-08	1.17535e-06	Slc25a1	protein_coding
ENSMUSG00000029004	7219.21	6273.96	8164.46	-0.363125	0.0652627	-5.44277	5.24598e-08	1.22175e-06	Kmt2e	protein_coding
ENSMUSG00000096472	1572.08	1392.34	1751.83	-0.338567	0.0622587	-5.44267	5.2487e-08	1.22175e-06	Cdkn2d	protein_coding
ENSMUSG00000022043	6932.8	6163.49	7702.12	-0.315746	0.0573644	-5.43957	5.34096e-08	1.24169e-06	Trim35	protein_coding
ENSMUSG00000005043	334.511	413.564	255.459	0.622191	0.107142	5.43355	5.52436e-08	1.28118e-06	Sgsh	protein_coding
ENSMUSG00000026525	294.438	217.485	371.39	-0.685816	0.124201	-5.43322	5.53463e-08	1.28199e-06	Opn3	protein_coding
ENSMUSG00000035024	1457.85	1650.06	1265.65	0.369004	0.0666906	5.42529	5.78602e-08	1.33694e-06	Ncapd3	protein_coding
ENSMUSG00000030878	234.578	176.141	293.016	-0.656678	0.117921	-5.42372	5.83726e-08	1.34549e-06	Cdr2	protein_coding
ENSMUSG00000025034	2434.11	2104.26	2763.95	-0.376587	0.0680428	-5.42061	5.93949e-08	1.36738e-06	Trim8	protein_coding
ENSMUSG00000037443	648.115	752.344	543.886	0.446298	0.0804174	5.41144	6.25208e-08	1.43064e-06	Cep85	protein_coding
ENSMUSG00000074890	263.769	319.194	208.345	0.576438	0.106173	5.41015	6.29727e-08	1.4375e-06	Lcmt2	protein_coding
ENSMUSG00000031755	1207.39	1382.96	1031.82	0.402463	0.0726185	5.40811	6.36922e-08	1.44867e-06	Bbs2	protein_coding
ENSMUSG00000031016	351.083	268.582	433.583	-0.627134	0.111092	-5.40786	6.37805e-08	1.44894e-06	Wee1	protein_coding
ENSMUSG00000023034	2008.97	2360.76	1657.18	0.476344	0.0852461	5.40651	6.42629e-08	1.45814e-06	Nr4a1	protein_coding
ENSMUSG00000003421	1732.37	1943.13	1521.62	0.335403	0.0604988	5.40596	6.44617e-08	1.4609e-06	Nosip	protein_coding
ENSMUSG00000030403	705.506	579.285	831.726	-0.484498	0.086605	-5.40475	6.48986e-08	1.46904e-06	Vasp	protein_coding
ENSMUSG00000036339	972.244	1210.94	733.548	0.651248	0.117145	5.40394	6.51939e-08	1.47396e-06	Tmem260	protein_coding
ENSMUSG00000036672	784.66	651.56	917.761	-0.46392	0.0834697	-5.40141	6.61202e-08	1.49312e-06	Cenpt	protein_coding
ENSMUSG00000009090	5797.34	6500.85	5093.84	0.347078	0.0636322	5.40115	6.62158e-08	1.49349e-06	Ap1b1	protein_coding
ENSMUSG00000034317	314.424	246.021	382.827	-0.581594	0.102764	-5.39596	6.8159e-08	1.53366e-06	Trim59	protein_coding
ENSMUSG00000060038	1332.03	1150.3	1513.76	-0.397278	0.0737985	-5.39537	6.83827e-08	1.53686e-06	Dhps	protein_coding
ENSMUSG00000018293	3547.32	2981.38	4113.27	-0.434925	0.0781346	-5.38949	7.06577e-08	1.58611e-06	Pfn1	protein_coding
ENSMUSG00000024143	1456.86	1261.9	1651.83	-0.375631	0.0684881	-5.38826	7.11448e-08	1.59515e-06	Rhoq	protein_coding
ENSMUSG00000016624	605.845	725.606	486.085	0.542545	0.100181	5.38629	7.19289e-08	1.61081e-06	Phf21b	protein_coding
ENSMUSG00000035064	2110.65	1835.93	2385.38	-0.369346	0.0677301	-5.38549	7.22482e-08	1.61605e-06	Eef2k	protein_coding
ENSMUSG00000024646	2192.2	1857.97	2526.43	-0.42984	0.0788878	-5.37867	7.50394e-08	1.67452e-06	Cyb5a	protein_coding
ENSMUSG00000017679	3271.83	3647.84	2895.83	0.328186	0.0604017	5.37644	7.59743e-08	1.69338e-06	Ttpal	protein_coding
ENSMUSG00000013997	1796.42	2072.78	1520.07	0.429258	0.0784607	5.37389	7.70559e-08	1.71345e-06	Nit1	protein_coding
ENSMUSG00000022948	405.577	481.125	330.03	0.507599	0.0917649	5.37331	7.73026e-08	1.71692e-06	Setd4	protein_coding
ENSMUSG00000006958	1378.92	1584.07	1173.78	0.425396	0.0788653	5.36948	7.89623e-08	1.75172e-06	Chrd	protein_coding
ENSMUSG00000026547	574.413	455.126	693.699	-0.549796	0.0971942	-5.36814	7.95549e-08	1.7628e-06	Tagln2	protein_coding
ENSMUSG00000025597	546.551	456.591	636.512	-0.463886	0.0858819	-5.36322	8.17521e-08	1.80514e-06	Klhl4	protein_coding
ENSMUSG00000026463	11400.9	9084.44	13717.4	-0.544539	0.0976974	-5.35902	8.36746e-08	1.84328e-06	Atp2b4	protein_coding
ENSMUSG00000020358	6920.34	6144.59	7696.09	-0.321536	0.0594658	-5.35699	8.46208e-08	1.86195e-06	Hnrnpab	protein_coding
ENSMUSG00000039106	784.34	673.119	895.561	-0.403081	0.0742395	-5.35444	8.58228e-08	1.88621e-06	Htr5a	protein_coding
ENSMUSG00000019891	729.699	840.6	618.798	0.424258	0.077706	5.35374	8.61529e-08	1.89126e-06	Dcbld1	protein_coding
ENSMUSG00000020368	15175.4	13759.1	16591.6	-0.257281	0.0473354	-5.34634	8.97525e-08	1.96311e-06	Canx	protein_coding
ENSMUSG00000029576	537.739	434.661	640.817	-0.520851	0.0941327	-5.34521	9.03123e-08	1.97112e-06	Radil	protein_coding
ENSMUSG00000074749	505.019	594.185	415.852	0.479239	0.0866908	5.34358	9.11284e-08	1.98433e-06	Kiz	protein_coding
ENSMUSG00000032878	3760.44	3292.94	4227.93	-0.36894	0.0695521	-5.34143	9.22146e-08	2.00339e-06	Ccdc85a	protein_coding
ENSMUSG00000041079	587.052	687.433	486.67	0.464437	0.0837637	5.34051	9.26841e-08	2.01128e-06	Rwdd2b	protein_coding
ENSMUSG00000041765	1295.61	1464.38	1126.85	0.372127	0.0691289	5.33606	9.49875e-08	2.0589e-06	Ubac2	protein_coding
ENSMUSG00000057406	8127.11	7242.36	9011.85	-0.312903	0.05812	-5.33436	9.58808e-08	2.07557e-06	Nsd2	protein_coding
ENSMUSG00000006699	15154.8	13730.8	16578.9	-0.278435	0.0521119	-5.33162	9.7343e-08	2.10272e-06	Cdc42	protein_coding
ENSMUSG00000078490	853.214	971.821	734.608	0.390095	0.0719266	5.32457	1.01191e-07	2.18085e-06	Cfap74	protein_coding
ENSMUSG00000034825	6760.77	5977.78	7543.76	-0.323058	0.0595651	-5.32359	1.01737e-07	2.19012e-06	Nrip3	protein_coding
ENSMUSG00000006522	595.94	717.817	474.063	0.547338	0.0995688	5.31836	1.04709e-07	2.24898e-06	Itih3	protein_coding
ENSMUSG00000050822	2248.76	1878.04	2619.47	-0.464822	0.0871019	-5.31431	1.07061e-07	2.29428e-06	Slc29a4	protein_coding
ENSMUSG00000006418	1767.37	2014.74	1520	0.388766	0.0715458	5.31325	1.0769e-07	2.30254e-06	Rnf114	protein_coding
ENSMUSG00000038777	1919.19	1609.92	2228.45	-0.449708	0.0835367	-5.30956	1.09887e-07	2.34687e-06	Sema6c	protein_coding
ENSMUSG00000022375	181.034	233.367	128.701	0.730446	0.133209	5.30851	1.10523e-07	2.35778e-06	Lrrc6	protein_coding
ENSMUSG00000015222	60711.8	53521.8	67901.8	-0.338781	0.0631847	-5.30577	1.12198e-07	2.38812e-06	Map2	protein_coding
ENSMUSG00000025137	2628.4	2237.99	3018.81	-0.41476	0.0768117	-5.30381	1.1341e-07	2.41121e-06	Pcyt2	protein_coding
ENSMUSG00000033319	1368.83	1184.88	1552.78	-0.377254	0.0698579	-5.30292	1.13965e-07	2.42029e-06	Fem1c	protein_coding
ENSMUSG00000015217	478.372	393.944	562.8	-0.488123	0.091055	-5.29591	1.18428e-07	2.51224e-06	Hmgb3	protein_coding
ENSMUSG00000021662	1481.84	1203.24	1760.43	-0.512367	0.0944089	-5.29076	1.21807e-07	2.58102e-06	Arhgef28	protein_coding
ENSMUSG00000018042	2846.72	3182	2511.44	0.328987	0.0610074	5.28697	1.24357e-07	2.62917e-06	Cyb5r3	protein_coding
ENSMUSG00000028082	2397.34	1965.06	2829.61	-0.500764	0.0938305	-5.28603	1.25001e-07	2.63982e-06	Sh3d19	protein_coding
ENSMUSG00000050821	13907	15894.5	11919.5	0.403125	0.0753013	5.28524	1.25537e-07	2.64819e-06	Fam131a	protein_coding
ENSMUSG00000030881	5052.27	5613.16	4491.39	0.309902	0.0577007	5.27721	1.31168e-07	2.75162e-06	Arfip2	protein_coding
ENSMUSG00000050332	1076.2	906.065	1246.33	-0.444658	0.0835145	-5.27593	1.32085e-07	2.76471e-06	Amer1	protein_coding
ENSMUSG00000008475	6400.63	5534.33	7266.92	-0.387304	0.0728985	-5.27266	1.34457e-07	2.80855e-06	Arpc5	protein_coding
ENSMUSG00000027778	1067.46	1204.61	930.316	0.362218	0.0675495	5.27187	1.35044e-07	2.81729e-06	Ift80	protein_coding
ENSMUSG00000060671	3217.35	2856.58	3578.11	-0.307668	0.0570786	-5.26811	1.37836e-07	2.8692e-06	Atp8b2	protein_coding
ENSMUSG00000028771	2018.64	1788.13	2249.16	-0.325364	0.0610393	-5.26761	1.38209e-07	2.87381e-06	Ptpn12	protein_coding
ENSMUSG00000018537	1629.02	1412.01	1846.03	-0.368814	0.0684252	-5.26631	1.39191e-07	2.89104e-06	Pcgf2	protein_coding
ENSMUSG00000024897	15498.1	13827	17169.1	-0.311135	0.058677	-5.26181	1.42646e-07	2.95631e-06	Apba1	protein_coding
ENSMUSG00000052726	2038.88	1761.56	2316.19	-0.396198	0.0755313	-5.2544	1.48509e-07	3.07445e-06	Kcnt2	protein_coding
ENSMUSG00000044042	714.673	840.885	588.461	0.482373	0.0892265	5.25399	1.48838e-07	3.07788e-06	Fmn1	protein_coding
ENSMUSG00000029064	34666.3	31256	38076.6	-0.282846	0.0533829	-5.25209	1.50385e-07	3.10649e-06	Gnb1	protein_coding
ENSMUSG00000035769	336.171	399.98	272.363	0.527536	0.101694	5.24936	1.52632e-07	3.14081e-06	Xylb	protein_coding
ENSMUSG00000001323	6681.63	7469.09	5894.17	0.326543	0.0609462	5.24634	1.55151e-07	3.18751e-06	Srr	protein_coding
ENSMUSG00000028873	181.78	134.258	229.302	-0.6772	0.126737	-5.24004	1.60544e-07	3.29473e-06	Cdca8	protein_coding
ENSMUSG00000026509	3034.06	2687.36	3380.76	-0.314545	0.0587493	-5.23568	1.64376e-07	3.36971e-06	Capn2	protein_coding
ENSMUSG00000024357	686.884	812.811	560.958	0.493309	0.0909338	5.2312	1.68413e-07	3.44873e-06	Sil1	protein_coding
ENSMUSG00000061119	725.206	617.253	833.159	-0.410921	0.0764566	-5.22836	1.71017e-07	3.49447e-06	Prcp	protein_coding
ENSMUSG00000031790	1369.47	1133.49	1605.44	-0.472163	0.0882359	-5.22713	1.72157e-07	3.51018e-06	Mmp15	protein_coding
ENSMUSG00000019647	2931.51	2415.49	3447.53	-0.480341	0.089512	-5.21932	1.79577e-07	3.65754e-06	Sema6a	protein_coding
ENSMUSG00000041417	9130.87	8211.6	10050.2	-0.291368	0.055442	-5.2164	1.82436e-07	3.71176e-06	Pik3r1	protein_coding
ENSMUSG00000001794	4324.26	3691.46	4957.06	-0.395649	0.0732641	-5.21297	1.85839e-07	3.77287e-06	Capns1	protein_coding
ENSMUSG00000027890	432.838	507.705	357.972	0.47732	0.0890204	5.21188	1.86941e-07	3.79089e-06	Gstm4	protein_coding
ENSMUSG00000052684	1643.08	1371.8	1914.36	-0.441983	0.0812791	-5.20991	1.88936e-07	3.81933e-06	Jun	protein_coding
ENSMUSG00000040797	4702.54	5324.53	4080.54	0.388669	0.0752939	5.20919	1.89666e-07	3.83001e-06	Iqsec3	protein_coding
ENSMUSG00000069495	2616.66	2931.18	2302.13	0.339275	0.0641701	5.20673	1.92202e-07	3.87707e-06	Epc2	protein_coding
ENSMUSG00000038260	940.824	803.316	1078.33	-0.414316	0.0791947	-5.20146	1.97724e-07	3.97996e-06	Trpm4	protein_coding
ENSMUSG00000048920	2242.01	2568.09	1915.94	0.391267	0.072361	5.19646	2.03115e-07	4.07546e-06	Fkrp	protein_coding
ENSMUSG00000039542	17079.5	14228	19930.9	-0.451495	0.0838375	-5.19308	2.06838e-07	4.14576e-06	Ncam1	protein_coding
ENSMUSG00000028779	1303.98	1473.65	1134.31	0.366734	0.0695491	5.1889	2.1154e-07	4.23102e-06	Pef1	protein_coding
ENSMUSG00000039830	1388.81	1180.5	1597.13	-0.429952	0.0831588	-5.18444	2.16664e-07	4.32435e-06	Olig2	protein_coding
ENSMUSG00000032579	656.867	759.42	554.314	0.431635	0.0813635	5.18318	2.18136e-07	4.34915e-06	Hemk1	protein_coding
ENSMUSG00000032312	1715.99	1495.89	1936.09	-0.369361	0.0709995	-5.18252	2.18913e-07	4.36004e-06	Csk	protein_coding
ENSMUSG00000074480	682.132	532.456	831.808	-0.582233	0.109053	-5.17237	2.31139e-07	4.58903e-06	Mex3a	protein_coding
ENSMUSG00000028057	1073.47	918.237	1228.7	-0.417377	0.0807759	-5.17091	2.32951e-07	4.62015e-06	Rit1	protein_coding
ENSMUSG00000054792	2253.07	1973.51	2532.63	-0.347879	0.0662238	-5.16413	2.41565e-07	4.78097e-06	Klhl18	protein_coding
ENSMUSG00000051343	2377.87	2049.21	2706.53	-0.379338	0.0714876	-5.16295	2.43089e-07	4.80609e-06	Rab11fip5	protein_coding
ENSMUSG00000080268	520.111	626.9	413.323	0.550904	0.104065	5.16235	2.43871e-07	4.81651e-06	Brms1	protein_coding
ENSMUSG00000055022	26288.8	23548.5	29029	-0.306622	0.0593177	-5.16036	2.46469e-07	4.86275e-06	Cntn1	protein_coding
ENSMUSG00000032245	420.778	505.848	335.709	0.542884	0.101901	5.15647	2.51646e-07	4.95453e-06	Cln6	protein_coding
ENSMUSG00000058454	2182.37	1898.53	2466.21	-0.371344	0.071493	-5.15378	2.55286e-07	5.01056e-06	Dhcr7	protein_coding
ENSMUSG00000030091	2357.46	2700.1	2014.81	0.416346	0.080734	5.15188	2.57888e-07	5.05636e-06	Nup210	protein_coding
ENSMUSG00000022285	18539.7	16762.7	20316.6	-0.254445	0.0482034	-5.15052	2.59758e-07	5.08777e-06	Ywhaz	protein_coding
ENSMUSG00000097195	494.613	403.72	585.507	-0.496698	0.0934222	-5.14924	2.61542e-07	5.11741e-06	Snhg5	processed_transcript
ENSMUSG00000022707	798.861	929.018	668.704	0.434653	0.0805819	5.14771	2.6369e-07	5.15408e-06	Gbe1	protein_coding
ENSMUSG00000042901	1356.05	1187.65	1524.45	-0.354126	0.0680676	-5.14537	2.67e-07	5.20801e-06	Aida	protein_coding
ENSMUSG00000020458	28902.8	26151.8	31653.7	-0.265429	0.0508207	-5.14318	2.70122e-07	5.26348e-06	Rtn4	protein_coding
ENSMUSG00000020080	700.679	851.351	550.007	0.573388	0.109004	5.13846	2.76998e-07	5.38082e-06	Hkdc1	protein_coding
ENSMUSG00000039199	1218.88	1378.08	1059.67	0.369823	0.0711163	5.1328	2.85458e-07	5.53054e-06	Zdhhc1	protein_coding
ENSMUSG00000003271	248.284	311.514	185.054	0.653217	0.119321	5.13087	2.884e-07	5.57937e-06	Sult2b1	protein_coding
ENSMUSG00000078851	620.19	512.172	728.209	-0.470595	0.0886113	-5.12919	2.90985e-07	5.62363e-06	Hist3h2a	protein_coding
ENSMUSG00000025366	469.113	385.552	552.674	-0.486186	0.0923365	-5.12716	2.94144e-07	5.67307e-06	Esyt1	protein_coding
ENSMUSG00000033102	297.457	364.798	230.116	0.597364	0.112366	5.12097	3.03963e-07	5.85051e-06	Cdc14b	protein_coding
ENSMUSG00000055493	1829.25	2044.78	1613.73	0.327177	0.0625862	5.11658	3.11121e-07	5.97611e-06	Epm2a	protein_coding
ENSMUSG00000031012	5954.95	5400.34	6509.57	-0.268254	0.0520373	-5.11164	3.19371e-07	6.11593e-06	Cask	protein_coding
ENSMUSG00000020658	7412.41	6546.82	8277.99	-0.319145	0.0609822	-5.10217	3.35773e-07	6.41703e-06	Efr3b	protein_coding
ENSMUSG00000015189	4151.69	4617.27	3686.1	0.3006	0.0572105	5.09912	3.41237e-07	6.51488e-06	Casd1	protein_coding
ENSMUSG00000034110	680.248	577.883	782.612	-0.421871	0.0818067	-5.09784	3.43557e-07	6.55255e-06	Kctd7	protein_coding
ENSMUSG00000074259	601.594	515.329	687.86	-0.40368	0.0780672	-5.09602	3.46869e-07	6.60239e-06	Gramd2	protein_coding
ENSMUSG00000031628	2299.27	1944.03	2654.51	-0.44144	0.0871041	-5.09481	3.49085e-07	6.63591e-06	Casp3	protein_coding
ENSMUSG00000044475	840.631	952.779	728.484	0.382457	0.0747551	5.09468	3.49332e-07	6.63591e-06	Ascc1	protein_coding
ENSMUSG00000022237	869.95	1063.98	675.921	0.599158	0.12141	5.09382	3.50924e-07	6.65945e-06	Ankrd33b	protein_coding
ENSMUSG00000020866	7383.64	6428.67	8338.62	-0.3664	0.0712642	-5.08256	3.72382e-07	7.0384e-06	Cacna1g	protein_coding
ENSMUSG00000042284	1065.63	913.871	1217.39	-0.378938	0.071278	-5.07969	3.78051e-07	7.13841e-06	Itga1	protein_coding
ENSMUSG00000032174	8350.11	9658.04	7042.19	0.444343	0.0876285	5.0766	3.84241e-07	7.24804e-06	Icam5	protein_coding
ENSMUSG00000030609	746.055	632.422	859.688	-0.43161	0.084841	-5.06942	3.99027e-07	7.50448e-06	Aen	protein_coding
ENSMUSG00000035041	43.3744	64.2879	22.461	0.968337	0.184275	5.06613	4.05978e-07	7.62763e-06	Creb3l3	protein_coding
ENSMUSG00000038252	1290.25	1129.09	1451.4	-0.344204	0.0663254	-5.06364	4.11318e-07	7.70498e-06	Ncapd2	protein_coding
ENSMUSG00000041264	2010.18	1769.86	2250.5	-0.346427	0.0682073	-5.06365	4.11299e-07	7.70498e-06	Uspl1	protein_coding
ENSMUSG00000020290	5212.62	4588.93	5836.32	-0.341231	0.0666693	-5.06303	4.12648e-07	7.72223e-06	Xpo1	protein_coding
ENSMUSG00000022391	6056.42	5202.36	6910.48	-0.383162	0.0732968	-5.06202	4.14836e-07	7.75551e-06	Rangap1	protein_coding
ENSMUSG00000027715	451.026	376.415	525.638	-0.464278	0.0918211	-5.05935	4.20687e-07	7.85711e-06	Ccna2	protein_coding
ENSMUSG00000020107	1991.39	2239.61	1743.17	0.343488	0.0661848	5.05879	4.21921e-07	7.87239e-06	Anapc16	protein_coding
ENSMUSG00000027932	271.024	206.881	335.167	-0.615386	0.116897	-5.05803	4.23599e-07	7.88157e-06	Slc27a3	protein_coding
ENSMUSG00000036737	2768.55	2478.21	3058.9	-0.291698	0.0565927	-5.05801	4.23664e-07	7.88157e-06	Oxsr1	protein_coding
ENSMUSG00000046854	248.932	191.196	306.669	-0.60815	0.116037	-5.05806	4.23542e-07	7.88157e-06	Pip5kl1	protein_coding
ENSMUSG00000030729	34856.5	30656.3	39056.7	-0.346879	0.0681519	-5.05433	4.31906e-07	8.01125e-06	Pgm2l1	protein_coding
ENSMUSG00000026185	7831.18	6538.98	9123.39	-0.456042	0.0886334	-5.05202	4.37163e-07	8.10081e-06	Igfbp5	protein_coding
ENSMUSG00000019461	966.576	813.8	1119.35	-0.42944	0.0823559	-5.05119	4.39059e-07	8.12797e-06	Plscr3	protein_coding
ENSMUSG00000024127	11483.9	9951.47	13016.3	-0.369363	0.0714905	-5.04908	4.43941e-07	8.1998e-06	Prepl	protein_coding
ENSMUSG00000034993	1790.01	1496.58	2083.44	-0.447399	0.0861308	-5.04895	4.44241e-07	8.1998e-06	Vat1	protein_coding
ENSMUSG00000021901	6403.49	7062.97	5744.01	0.284017	0.0551687	5.04556	4.52196e-07	8.33849e-06	Bap1	protein_coding
ENSMUSG00000017715	2473.1	2742.12	2204.09	0.301954	0.058657	5.04468	4.54269e-07	8.36856e-06	Pgs1	protein_coding
ENSMUSG00000024799	1279.77	1084.03	1475.52	-0.422841	0.0822363	-5.03404	4.80252e-07	8.8043e-06	Vps51	protein_coding
ENSMUSG00000024381	6431.76	5530.53	7332.98	-0.383472	0.0740927	-5.03229	4.84663e-07	8.85557e-06	Bin1	protein_coding
ENSMUSG00000032182	575.348	667.094	483.601	0.444689	0.0867164	5.03257	4.83944e-07	8.85557e-06	Yipf2	protein_coding
ENSMUSG00000033420	991.264	862.271	1120.26	-0.358628	0.0694579	-5.0325	4.84116e-07	8.85557e-06	Antxr1	protein_coding
ENSMUSG00000048755	713.431	812.557	614.304	0.389471	0.0760247	5.03218	4.84922e-07	8.85557e-06	Mcat	protein_coding
ENSMUSG00000028199	630.614	731.016	530.212	0.430269	0.0821693	5.0313	4.87171e-07	8.87948e-06	Cryz	protein_coding
ENSMUSG00000028843	2747.45	2397.41	3097.49	-0.360841	0.070767	-5.03148	4.86704e-07	8.87948e-06	Sh3bgrl3	protein_coding
ENSMUSG00000015745	1185.4	1030.54	1340.26	-0.366009	0.0714709	-5.03068	4.88735e-07	8.8994e-06	Plekho1	protein_coding
ENSMUSG00000011589	1806.17	1568.33	2044.01	-0.378573	0.0751918	-5.02197	5.1145e-07	9.28444e-06	Fsd1	protein_coding
ENSMUSG00000021094	477.475	561.954	392.995	0.477668	0.091855	5.02147	5.12782e-07	9.29251e-06	Dhrs7	protein_coding
ENSMUSG00000001416	4251.37	3825.98	4676.75	-0.29218	0.0579942	-5.01546	5.29056e-07	9.56907e-06	Cct3	protein_coding
ENSMUSG00000020737	3111.45	2681.72	3541.18	-0.392424	0.0777164	-5.01456	5.31553e-07	9.60505e-06	Jpt1	protein_coding
ENSMUSG00000024059	2607.77	2957.55	2257.99	0.37029	0.072124	5.01256	5.37117e-07	9.69632e-06	Clip4	protein_coding
ENSMUSG00000006731	3821.84	3397.75	4245.94	-0.309359	0.0605491	-5.01219	5.38133e-07	9.7054e-06	B4galnt1	protein_coding
ENSMUSG00000027900	1182.98	1047.97	1317.98	-0.328621	0.0649821	-5.01119	5.40931e-07	9.74656e-06	Dram2	protein_coding
ENSMUSG00000025268	2531.6	2160.96	2902.25	-0.409848	0.0806966	-5.01088	5.41806e-07	9.75303e-06	Maged2	protein_coding
ENSMUSG00000020649	229.823	180.312	279.334	-0.570879	0.110782	-5.01032	5.4339e-07	9.77223e-06	Rrm2	protein_coding
ENSMUSG00000007850	11544	10355.2	12732.9	-0.28754	0.0564327	-5.00923	5.46478e-07	9.81842e-06	Hnrnph1	protein_coding
ENSMUSG00000022799	1531.46	1338.77	1724.14	-0.343463	0.0665359	-5.00871	5.47962e-07	9.82676e-06	Arhgap31	protein_coding
ENSMUSG00000040693	250.904	181.759	320.049	-0.696507	0.140583	-5.0087	5.47982e-07	9.82676e-06	Slco4c1	protein_coding
ENSMUSG00000001924	11771.3	10057.7	13484.9	-0.390226	0.0749193	-5.00636	5.54682e-07	9.9269e-06	Uba1	protein_coding
ENSMUSG00000039347	18463.8	20303	16624.7	0.286518	0.0567565	5.00554	5.57051e-07	9.94947e-06	Atp6v0e2	protein_coding
ENSMUSG00000037348	1503.87	1289.19	1718.55	-0.397534	0.0778924	-5.00518	5.58103e-07	9.95161e-06	Paqr7	protein_coding
ENSMUSG00000042590	3374.31	3020.09	3728.52	-0.306709	0.0610513	-5.00419	5.60974e-07	9.99338e-06	Ipo11	protein_coding
ENSMUSG00000021693	6401.3	5745.2	7057.4	-0.289234	0.056988	-5.00249	5.6596e-07	1.00727e-05	Kif2a	protein_coding
ENSMUSG00000003865	783.5	668.08	898.921	-0.400056	0.0773876	-4.99832	5.78316e-07	1.02829e-05	Gys1	protein_coding
ENSMUSG00000022781	2593.35	2324.65	2862.04	-0.293108	0.0578087	-4.99748	5.80834e-07	1.03083e-05	Pak2	protein_coding
ENSMUSG00000091337	14727.8	13004.4	16451.1	-0.343333	0.0687916	-4.99662	5.83425e-07	1.03446e-05	Eid1	protein_coding
ENSMUSG00000001018	2020.52	2310.82	1730.22	0.395153	0.0771709	4.99338	5.93307e-07	1.05099e-05	Snapin	protein_coding
ENSMUSG00000049521	405.616	339.544	471.687	-0.458618	0.0924469	-4.99226	5.9676e-07	1.05612e-05	Cdc42ep1	protein_coding
ENSMUSG00000054051	2094.98	2320.74	1869.22	0.307609	0.0609517	4.9908	6.0129e-07	1.06314e-05	Ercc6	protein_coding
ENSMUSG00000038280	2498.3	2806	2190.59	0.346288	0.0683645	4.98766	6.11165e-07	1.07959e-05	Ostm1	protein_coding
ENSMUSG00000038827	2026.93	2264.68	1789.18	0.325785	0.0640198	4.98353	6.24361e-07	1.10187e-05	Fam206a	protein_coding
ENSMUSG00000022761	5533.73	4879.59	6187.86	-0.33761	0.0671275	-4.9802	6.3519e-07	1.11994e-05	Lztr1	protein_coding
ENSMUSG00000038241	2018.81	1741.52	2296.09	-0.372134	0.0723451	-4.97824	6.41649e-07	1.13027e-05	Cep250	protein_coding
ENSMUSG00000039530	7879.48	8698.08	7060.88	0.278761	0.0545257	4.97363	6.57119e-07	1.15644e-05	Tusc3	protein_coding
ENSMUSG00000026554	6628.31	7319.89	5936.74	0.289629	0.0571544	4.97344	6.57755e-07	1.15649e-05	Dcaf8	protein_coding
ENSMUSG00000029076	7294.57	7936	6653.14	0.242178	0.0478821	4.97226	6.61753e-07	1.16243e-05	Sdf4	protein_coding
ENSMUSG00000025982	17806.4	19520.6	16092.3	0.272794	0.0541887	4.97079	6.66817e-07	1.17003e-05	Sf3b1	protein_coding
ENSMUSG00000024451	615.911	517.4	714.422	-0.432103	0.0836354	-4.96649	6.81756e-07	1.19203e-05	Arap3	protein_coding
ENSMUSG00000001082	721.362	616.687	826.038	-0.410443	0.0821113	-4.96544	6.85457e-07	1.19519e-05	Mfsd10	protein_coding
ENSMUSG00000024142	1770.4	1993.94	1546.85	0.355159	0.0703978	4.96556	6.85028e-07	1.19519e-05	Mlst8	protein_coding
ENSMUSG00000022055	15171.8	13469	16874.6	-0.321869	0.0642863	-4.96257	6.95665e-07	1.21187e-05	Nefl	protein_coding
ENSMUSG00000031723	658.586	761.727	555.445	0.422985	0.0820192	4.9595	7.06732e-07	1.22888e-05	Txnl4b	protein_coding
ENSMUSG00000026500	444.687	364.364	525.01	-0.489654	0.0959683	-4.95772	7.13266e-07	1.23797e-05	Cox20	protein_coding
ENSMUSG00000039585	7021.48	6372.23	7670.72	-0.26911	0.0539661	-4.95654	7.17599e-07	1.24434e-05	Myo9a	protein_coding
ENSMUSG00000020288	1545.84	1365.94	1725.74	-0.322825	0.0637681	-4.9555	7.21462e-07	1.2492e-05	Ahsa2	protein_coding
ENSMUSG00000030894	2288.5	2512.07	2064.93	0.295608	0.060163	4.94978	7.42981e-07	1.28247e-05	Tpp1	protein_coding
ENSMUSG00000063229	9634.17	8603.57	10664.8	-0.302567	0.0603242	-4.94629	7.56431e-07	1.30331e-05	Ldha	protein_coding
ENSMUSG00000028033	5093.16	4542.42	5643.89	-0.308149	0.0615518	-4.94535	7.60084e-07	1.30841e-05	Kcnq5	protein_coding
ENSMUSG00000024486	723.39	623.667	823.114	-0.385315	0.0766658	-4.94404	7.65189e-07	1.3148e-05	Hbegf	protein_coding
ENSMUSG00000008090	569.378	485.874	652.882	-0.410555	0.0818363	-4.94146	7.75413e-07	1.32995e-05	Fgfrl1	protein_coding
ENSMUSG00000035828	1014.57	879.757	1149.38	-0.37717	0.075823	-4.93577	7.98334e-07	1.36555e-05	Pim3	protein_coding
ENSMUSG00000026430	864.933	742.715	987.151	-0.400864	0.0803471	-4.93327	8.08626e-07	1.3819e-05	Rassf5	protein_coding
ENSMUSG00000024691	262.233	200.633	323.833	-0.611066	0.117902	-4.93296	8.09935e-07	1.38289e-05	Fam111a	protein_coding
ENSMUSG00000045136	10888.2	7150.3	14626.1	-0.804571	0.160669	-4.93198	8.14005e-07	1.388e-05	Tubb2b	protein_coding
ENSMUSG00000025758	258.335	208.051	308.618	-0.526822	0.104119	-4.93115	8.17478e-07	1.392e-05	Plk4	protein_coding
ENSMUSG00000059316	4013.58	3560.7	4466.47	-0.308965	0.0611865	-4.9251	8.43157e-07	1.43185e-05	Slc27a4	protein_coding
ENSMUSG00000031299	14231.6	12791.6	15671.6	-0.289455	0.0581676	-4.92452	8.45693e-07	1.43487e-05	Pdha1	protein_coding
ENSMUSG00000053617	2072.05	2373.85	1770.25	0.415509	0.0844351	4.91797	8.74472e-07	1.48237e-05	Sh3pxd2a	protein_coding
ENSMUSG00000042523	7581.11	8333.65	6828.57	0.276054	0.0551611	4.91522	8.86818e-07	1.5006e-05	Dnal1	protein_coding
ENSMUSG00000024193	853.955	721.976	985.934	-0.427967	0.0858398	-4.91276	8.98045e-07	1.51487e-05	Phf1	protein_coding
ENSMUSG00000026181	2133.86	1913.41	2354.3	-0.286254	0.0570809	-4.91298	8.97042e-07	1.51487e-05	Ppm1f	protein_coding
ENSMUSG00000021194	5903.7	5125.6	6681.8	-0.344074	0.0668274	-4.91066	9.07726e-07	1.52642e-05	Chga	protein_coding
ENSMUSG00000030844	1025.51	905.083	1145.95	-0.352159	0.0728292	-4.90359	9.41004e-07	1.57957e-05	Rgs10	protein_coding
ENSMUSG00000029238	5918.86	6562.39	5275.33	0.30745	0.0618668	4.90203	9.48517e-07	1.59076e-05	Clock	protein_coding
ENSMUSG00000028613	8582.25	7701.79	9462.72	-0.294776	0.0596121	-4.90137	9.51714e-07	1.59471e-05	Lrp8	protein_coding
ENSMUSG00000030545	497.276	578.77	415.781	0.447115	0.0885733	4.89834	9.66484e-07	1.61374e-05	Pex11a	protein_coding
ENSMUSG00000072294	1391.75	1193.39	1590.11	-0.403136	0.0816473	-4.89837	9.66363e-07	1.61374e-05	Klf12	protein_coding
ENSMUSG00000040009	4438.25	4002.01	4874.49	-0.284195	0.0576071	-4.89747	9.70794e-07	1.61808e-05	Gnaz	protein_coding
ENSMUSG00000018669	1498.98	1689.62	1308.35	0.355126	0.0709302	4.89608	9.77678e-07	1.62811e-05	Cdk5rap3	protein_coding
ENSMUSG00000028194	6785.14	6189.09	7381.19	-0.246503	0.049683	-4.89373	9.89417e-07	1.64621e-05	Ddah1	protein_coding
ENSMUSG00000027953	793.019	901.822	684.217	0.375675	0.0746291	4.89239	9.962e-07	1.65458e-05	Slc50a1	protein_coding
ENSMUSG00000070436	1498.97	1278.89	1719.04	-0.401917	0.0799061	-4.89105	1.00297e-06	1.66437e-05	Serpinh1	protein_coding
ENSMUSG00000038398	2020.51	2248.86	1792.16	0.329482	0.0671206	4.89041	1.00626e-06	1.66835e-05	Upf3a	protein_coding
ENSMUSG00000027405	2505.15	2263.03	2747.27	-0.266972	0.0535378	-4.88942	1.01132e-06	1.67529e-05	Nop56	protein_coding
ENSMUSG00000030104	1452.32	1267.71	1636.93	-0.363786	0.0739917	-4.88244	1.04783e-06	1.72819e-05	Edem1	protein_coding
ENSMUSG00000024588	2546.79	2854.68	2238.91	0.333149	0.0666308	4.88154	1.0526e-06	1.73454e-05	Fech	protein_coding
ENSMUSG00000005161	7261.54	6520.05	8003.02	-0.305011	0.0628327	-4.87527	1.08659e-06	1.78899e-05	Prdx2	protein_coding
ENSMUSG00000040037	14042.6	12457.3	15627.8	-0.319812	0.0647326	-4.87457	1.09048e-06	1.79384e-05	Negr1	protein_coding
ENSMUSG00000024165	304.174	244.031	364.317	-0.533616	0.10814	-4.87388	1.09426e-06	1.79849e-05	Jpt2	protein_coding
ENSMUSG00000026000	4569.55	5058.06	4081.04	0.313193	0.0642257	4.87048	1.11328e-06	1.82816e-05	Lancl1	protein_coding
ENSMUSG00000029174	1216.2	1364.59	1067.81	0.354713	0.0728781	4.86809	1.12685e-06	1.84562e-05	Tbc1d1	protein_coding
ENSMUSG00000029313	563.2	653.606	472.794	0.453681	0.0937633	4.86329	1.15453e-06	1.88444e-05	Aff1	protein_coding
ENSMUSG00000024130	5823.83	4994.92	6652.74	-0.385966	0.0767377	-4.86262	1.1584e-06	1.88912e-05	Abca3	protein_coding
ENSMUSG00000032435	4184.49	3758.65	4610.33	-0.273457	0.054717	-4.86171	1.16375e-06	1.89525e-05	Dync1li1	protein_coding
ENSMUSG00000024665	5032.32	4540.23	5524.41	-0.275851	0.0559611	-4.8613	1.1662e-06	1.89693e-05	Fads2	protein_coding
ENSMUSG00000069520	1853.61	2038.96	1668.26	0.285999	0.0583654	4.84942	1.23822e-06	2.00889e-05	Tmem19	protein_coding
ENSMUSG00000021704	3559.12	3918.84	3199.41	0.286809	0.0583357	4.84891	1.24144e-06	2.01239e-05	Mtx3	protein_coding
ENSMUSG00000036002	1489.44	1297.77	1681.1	-0.358089	0.0725014	-4.84547	1.2631e-06	2.04574e-05	Fam214b	protein_coding
ENSMUSG00000032109	280.911	350.994	210.827	0.636448	0.136159	4.83964	1.30073e-06	2.10309e-05	Nlrx1	protein_coding
ENSMUSG00000035521	2605.78	2913.62	2297.93	0.328549	0.066521	4.83881	1.30616e-06	2.11006e-05	Gnptg	protein_coding
ENSMUSG00000020268	238.746	308.194	169.298	0.729881	0.138211	4.83485	1.33244e-06	2.15068e-05	Lyrm7	protein_coding
ENSMUSG00000032586	1053.89	1202.72	905.069	0.39791	0.0812193	4.83268	1.3471e-06	2.17248e-05	Traip	protein_coding
ENSMUSG00000024325	1084.15	1277.61	890.689	0.493114	0.101562	4.83232	1.34954e-06	2.17456e-05	Ring1	protein_coding
ENSMUSG00000067377	1876.29	1659.19	2093.39	-0.339658	0.0706868	-4.82914	1.37121e-06	2.20385e-05	Tspan6	protein_coding
ENSMUSG00000056917	862.99	734.151	991.829	-0.413799	0.084349	-4.82805	1.37874e-06	2.21218e-05	Sipa1	protein_coding
ENSMUSG00000038836	576.971	682.561	471.381	0.492757	0.0974926	4.82769	1.38123e-06	2.21431e-05	Agbl3	protein_coding
ENSMUSG00000063160	4011.26	3459	4563.53	-0.369561	0.0736837	-4.8265	1.38952e-06	2.22571e-05	Numbl	protein_coding
ENSMUSG00000015749	4970.72	4480.57	5460.86	-0.273491	0.0556312	-4.82366	1.40949e-06	2.25197e-05	Anp32e	protein_coding
ENSMUSG00000043872	521.291	435.06	607.522	-0.456581	0.0933839	-4.82382	1.40833e-06	2.25197e-05	Zmym1	protein_coding
ENSMUSG00000008167	1496.6	1296.8	1696.39	-0.372906	0.076114	-4.8224	1.41845e-06	2.26436e-05	Fbxw9	protein_coding
ENSMUSG00000037519	1946.33	2155.56	1737.1	0.297504	0.0604513	4.81137	1.49897e-06	2.38285e-05	Ppfia1	protein_coding
ENSMUSG00000072964	3713.69	3342.52	4084.86	-0.277613	0.0566413	-4.80895	1.51726e-06	2.40787e-05	Bhlhb9	protein_coding
ENSMUSG00000021610	4519.35	4951.97	4086.74	0.269025	0.0551339	4.80653	1.5357e-06	2.43509e-05	Clptm1l	protein_coding
ENSMUSG00000027879	2492.32	2755.13	2229.51	0.295723	0.0604846	4.8042	1.55371e-06	2.45952e-05	Sec22b	protein_coding
ENSMUSG00000030979	1097.42	1235.01	959.822	0.353182	0.0724329	4.80359	1.55845e-06	2.46496e-05	Uros	protein_coding
ENSMUSG00000059772	597.915	510.313	685.516	-0.402839	0.0817987	-4.80335	1.56032e-06	2.46585e-05	Slx1b	protein_coding
ENSMUSG00000014813	332.365	265.404	399.327	-0.538859	0.109818	-4.79747	1.60686e-06	2.53516e-05	Stc1	protein_coding
ENSMUSG00000031827	2091.89	1847.31	2336.48	-0.336153	0.0697473	-4.79613	1.6176e-06	2.54998e-05	Cotl1	protein_coding
ENSMUSG00000018287	1592.15	1764.34	1419.97	0.299715	0.0611034	4.79547	1.62294e-06	2.55626e-05	Spag7	protein_coding
ENSMUSG00000046034	744.065	845.253	642.877	0.378591	0.0774092	4.79516	1.62542e-06	2.55803e-05	Otulin	protein_coding
ENSMUSG00000046822	3557.98	3950.64	3165.33	0.318751	0.0661392	4.79411	1.63397e-06	2.56935e-05	Slc39a3	protein_coding
ENSMUSG00000015016	660.923	771.132	550.713	0.446349	0.0890681	4.78419	1.71676e-06	2.68391e-05	Acsf3	protein_coding
ENSMUSG00000036860	533.798	624.699	442.896	0.454651	0.0898076	4.78363	1.7216e-06	2.68925e-05	Mrpl55	protein_coding
ENSMUSG00000020484	3184.69	2784.89	3584.49	-0.358183	0.0742975	-4.78247	1.73158e-06	2.70261e-05	Xbp1	protein_coding
ENSMUSG00000018899	191.426	234.91	147.942	0.593336	0.124367	4.78053	1.74834e-06	2.72632e-05	Irf1	protein_coding
ENSMUSG00000049932	1058.3	931.015	1185.58	-0.342162	0.0707521	-4.78038	1.74965e-06	2.72632e-05	H2afx	protein_coding
ENSMUSG00000052928	2894.95	2548.45	3241.44	-0.341042	0.0706941	-4.77817	1.76895e-06	2.75412e-05	Ctif	protein_coding
ENSMUSG00000030123	5872.54	5004.01	6741.07	-0.396807	0.0798663	-4.77335	1.81187e-06	2.81833e-05	Plxnd1	protein_coding
ENSMUSG00000032850	6252.66	6928.49	5576.83	0.303446	0.0625354	4.77314	1.8138e-06	2.81833e-05	Rnft2	protein_coding
ENSMUSG00000021275	4033	4450.22	3615.78	0.305477	0.0640979	4.77269	1.81782e-06	2.8209e-05	Tecpr2	protein_coding
ENSMUSG00000028047	1073.08	922.64	1223.52	-0.385962	0.0791407	-4.76459	1.89242e-06	2.92705e-05	Thbs3	protein_coding
ENSMUSG00000001786	948.592	1062.88	834.3	0.338718	0.0699272	4.7638	1.89977e-06	2.93603e-05	Fbxo7	protein_coding
ENSMUSG00000019942	200.809	147.809	253.809	-0.664115	0.136132	-4.76263	1.91089e-06	2.9508e-05	Cdk1	protein_coding
ENSMUSG00000063646	3694.35	3359.05	4029.64	-0.254607	0.0526723	-4.76166	1.92007e-06	2.96255e-05	Jakmip1	protein_coding
ENSMUSG00000061455	1948.61	2156.35	1740.87	0.297265	0.0611875	4.7607	1.92924e-06	2.97426e-05	Stx17	protein_coding
ENSMUSG00000021287	148.15	187.31	108.989	0.66714	0.133736	4.75903	1.94523e-06	2.99405e-05	Xrcc3	protein_coding
ENSMUSG00000053004	424.09	342.847	505.334	-0.510287	0.102295	-4.75745	1.9605e-06	3.01508e-05	Hrh1	protein_coding
ENSMUSG00000051497	960.79	814.964	1106.62	-0.427578	0.0900125	-4.75601	1.97457e-06	3.03426e-05	Kcnj16	protein_coding
ENSMUSG00000036989	4698.99	4160.22	5237.76	-0.316819	0.0652313	-4.74791	2.05533e-06	3.14557e-05	Trim3	protein_coding
ENSMUSG00000032803	1508.86	1330.78	1686.94	-0.323424	0.0663833	-4.74697	2.06488e-06	3.15763e-05	Cdv3	protein_coding
ENSMUSG00000048696	850.347	702.828	997.865	-0.47464	0.0991233	-4.74674	2.06718e-06	3.1586e-05	Mex3d	protein_coding
ENSMUSG00000020515	2056.65	2287.9	1825.39	0.309687	0.0636288	4.74358	2.09978e-06	3.20581e-05	Cnot8	protein_coding
ENSMUSG00000048076	8768.69	9577.07	7960.31	0.250574	0.0517034	4.73937	2.14382e-06	3.26778e-05	Arf1	protein_coding
ENSMUSG00000025212	4585.32	4119.79	5050.84	-0.285158	0.0592077	-4.73805	2.15783e-06	3.28648e-05	Sfxn3	protein_coding
ENSMUSG00000049775	24857.7	21395.2	28320.2	-0.395512	0.0831041	-4.73556	2.18452e-06	3.32177e-05	Tmsb4x	protein_coding
ENSMUSG00000026414	76.1682	105.039	47.2976	0.829752	0.172126	4.73505	2.18996e-06	3.32737e-05	Tnnt2	protein_coding
ENSMUSG00000020778	683.144	790.183	576.105	0.420322	0.0846977	4.73489	2.19172e-06	3.32737e-05	Ten1	protein_coding
ENSMUSG00000066979	2173.02	2406.43	1939.61	0.297126	0.0614423	4.73455	2.19539e-06	3.33026e-05	Bub3	protein_coding
ENSMUSG00000024521	126.684	168.613	84.7553	0.782871	0.15342	4.72826	2.26448e-06	3.42407e-05	Pmaip1	protein_coding
ENSMUSG00000079084	740.975	636.504	845.447	-0.394059	0.0823958	-4.72784	2.26917e-06	3.42842e-05	Ccdc82	protein_coding
ENSMUSG00000031295	1686.57	1888.69	1484.45	0.326026	0.0669305	4.72626	2.28694e-06	3.45251e-05	Phka2	protein_coding
ENSMUSG00000050796	559.901	644.508	475.295	0.425661	0.0900021	4.72471	2.30439e-06	3.47607e-05	B3galt6	protein_coding
ENSMUSG00000034205	138.663	102.937	174.388	-0.649561	0.133672	-4.72409	2.31145e-06	3.48395e-05	Loxl2	protein_coding
ENSMUSG00000032405	2400.21	2635.89	2164.54	0.282999	0.0594599	4.72275	2.32678e-06	3.50425e-05	Pias1	protein_coding
ENSMUSG00000033039	2613.77	2326.35	2901.19	-0.308902	0.0643853	-4.72146	2.34163e-06	3.52382e-05	Micall1	protein_coding
ENSMUSG00000038886	8722.48	9414.33	8030.63	0.22857	0.0480459	4.71958	2.36328e-06	3.55357e-05	Man2a2	protein_coding
ENSMUSG00000003847	5484.9	6036.35	4933.44	0.299873	0.0638654	4.71796	2.38227e-06	3.57927e-05	Nfat5	protein_coding
ENSMUSG00000020135	7851.65	6802.08	8901.21	-0.371521	0.0772727	-4.71584	2.40712e-06	3.61374e-05	Apc2	protein_coding
ENSMUSG00000029484	472.169	374.157	570.181	-0.559484	0.121898	-4.71484	2.41905e-06	3.6249e-05	Anxa3	protein_coding
ENSMUSG00000032564	3262.64	2817.15	3708.14	-0.356793	0.0718926	-4.71473	2.42031e-06	3.6249e-05	Cpne4	protein_coding
ENSMUSG00000030270	571.166	438.601	703.73	-0.601179	0.121575	-4.71451	2.4229e-06	3.6259e-05	Cpne9	protein_coding
ENSMUSG00000020056	570.878	661.273	480.482	0.426593	0.087105	4.70844	2.49623e-06	3.72975e-05	Washc3	protein_coding
ENSMUSG00000019944	535.304	447.727	622.881	-0.447636	0.0935308	-4.70693	2.51475e-06	3.75445e-05	Rhobtb1	protein_coding
ENSMUSG00000061461	589.594	689.477	489.71	0.458785	0.0949112	4.70446	2.54537e-06	3.79417e-05	Smim20	protein_coding
ENSMUSG00000004530	4345.38	3816.53	4874.24	-0.342969	0.071918	-4.70284	2.56568e-06	3.82143e-05	Coro1c	protein_coding
ENSMUSG00000085148	735.833	625.172	846.494	-0.415949	0.0868555	-4.70251	2.56977e-06	3.82451e-05	Mir22hg	processed_transcript
ENSMUSG00000001403	106.809	76.1433	137.475	-0.704953	0.145931	-4.70184	2.57821e-06	3.83172e-05	Ube2c	protein_coding
ENSMUSG00000032126	606.633	697.965	515.3	0.412214	0.0852428	4.70178	2.57906e-06	3.83172e-05	Hmbs	protein_coding
ENSMUSG00000041609	2365.78	2098.1	2633.46	-0.323688	0.0683283	-4.70165	2.5807e-06	3.83172e-05	Bicdl1	protein_coding
ENSMUSG00000047945	13243.5	11388.2	15098.7	-0.390587	0.0817958	-4.70115	2.58697e-06	3.83802e-05	Marcksl1	protein_coding
ENSMUSG00000003872	1385.65	1175.93	1595.37	-0.419174	0.0875876	-4.70032	2.59749e-06	3.85061e-05	Lin7b	protein_coding
ENSMUSG00000004865	4939.12	4502.25	5375.99	-0.246889	0.0517266	-4.69709	2.63898e-06	3.90903e-05	Srpk1	protein_coding
ENSMUSG00000032018	3608	3181.42	4034.57	-0.32423	0.067177	-4.69668	2.64424e-06	3.91247e-05	Sc5d	protein_coding
ENSMUSG00000013150	913.049	800.035	1026.06	-0.355217	0.0755661	-4.69593	2.65398e-06	3.92204e-05	Gfod2	protein_coding
ENSMUSG00000030707	2645.56	2327.12	2964	-0.337964	0.0708794	-4.69299	2.69242e-06	3.97298e-05	Coro1a	protein_coding
ENSMUSG00000025782	691.415	786.303	596.527	0.383147	0.0803426	4.69062	2.72384e-06	4.00619e-05	Taf3	protein_coding
ENSMUSG00000026970	1344.47	1184.27	1504.68	-0.326233	0.0675633	-4.69051	2.72529e-06	4.00619e-05	Rbms1	protein_coding
ENSMUSG00000050541	434.616	359.833	509.399	-0.47307	0.0994178	-4.69022	2.72905e-06	4.00791e-05	Adra1b	protein_coding
ENSMUSG00000038900	243.59	192.746	294.433	-0.555186	0.116789	-4.68976	2.73532e-06	4.014e-05	Rpl12	protein_coding
ENSMUSG00000030611	836.201	943.871	728.531	0.356255	0.074082	4.68635	2.78116e-06	4.0781e-05	Mrps11	protein_coding
ENSMUSG00000015214	2591.34	2838.27	2344.4	0.26592	0.0557933	4.6808	2.85759e-06	4.1772e-05	Mtmr1	protein_coding
ENSMUSG00000025579	5608.4	6596.12	4620.69	0.490091	0.107502	4.67835	2.89193e-06	4.21762e-05	Gaa	protein_coding
ENSMUSG00000028617	927.464	820.005	1034.92	-0.334966	0.0713445	-4.67722	2.90789e-06	4.23111e-05	Lrrc42	protein_coding
ENSMUSG00000057778	372.873	441.818	303.928	0.492611	0.100708	4.67727	2.90716e-06	4.23111e-05	Cyb5d2	protein_coding
ENSMUSG00000001844	1019.5	1139.65	899.341	0.329711	0.0692232	4.6736	2.95963e-06	4.29647e-05	Zdhhc4	protein_coding
ENSMUSG00000029634	2252.58	2529.08	1976.08	0.348924	0.0741238	4.67128	2.99334e-06	4.34206e-05	Rnf6	protein_coding
ENSMUSG00000026437	620.594	506.202	734.985	-0.491679	0.101249	-4.67082	3.00004e-06	4.34845e-05	Cdk18	protein_coding
ENSMUSG00000034994	38935.6	35781.5	42089.7	-0.238228	0.0508476	-4.66908	3.0255e-06	4.38199e-05	Eef2	protein_coding
ENSMUSG00000022061	204.221	249.88	158.562	0.57679	0.117452	4.66578	3.07455e-06	4.44622e-05	Nkx3-1	protein_coding
ENSMUSG00000026605	385.369	320.237	450.501	-0.463637	0.0988394	-4.6635	3.10875e-06	4.48881e-05	Cenpf	protein_coding
ENSMUSG00000031822	2059.43	2357.87	1760.99	0.424928	0.0954203	4.66282	3.11909e-06	4.5003e-05	Gse1	protein_coding
ENSMUSG00000022433	5091.69	4620.48	5562.91	-0.263267	0.0558696	-4.65909	3.17609e-06	4.57555e-05	Csnk1e	protein_coding
ENSMUSG00000039463	1433.01	1619.84	1246.18	0.363428	0.0764993	4.65877	3.18104e-06	4.57919e-05	Slc9a8	protein_coding
ENSMUSG00000026820	1224.15	1083.17	1365.13	-0.33483	0.0719564	-4.6573	3.20379e-06	4.60843e-05	Ptges2	protein_coding
ENSMUSG00000051817	1990.08	1702.45	2277.71	-0.40063	0.084634	-4.6563	3.21937e-06	4.62732e-05	Sox12	protein_coding
ENSMUSG00000018750	3736.84	3378.07	4095.62	-0.262926	0.0553127	-4.65031	3.31432e-06	4.75296e-05	Zbtb4	protein_coding
ENSMUSG00000000441	4920.73	4509.8	5331.66	-0.238112	0.0506803	-4.64921	3.33204e-06	4.77113e-05	Raf1	protein_coding
ENSMUSG00000070462	670.843	555.523	786.162	-0.466468	0.0978184	-4.64781	3.35481e-06	4.80009e-05	Tlnrd1	protein_coding
ENSMUSG00000034613	4025.11	3591.48	4458.73	-0.299199	0.0630556	-4.6472	3.36467e-06	4.81056e-05	Ppm1h	protein_coding
ENSMUSG00000026158	4924.65	5495.6	4353.7	0.33363	0.0714789	4.646	3.38425e-06	4.83125e-05	Ogfrl1	protein_coding
ENSMUSG00000021993	1334.58	1511.62	1157.55	0.356202	0.073759	4.64555	3.39168e-06	4.8382e-05	Mipep	protein_coding
ENSMUSG00000019876	238.268	287.581	188.955	0.553831	0.12027	4.64261	3.44034e-06	4.90391e-05	Pkib	protein_coding
ENSMUSG00000022711	1271.33	1411.99	1130.67	0.302693	0.0633264	4.64239	3.44409e-06	4.90556e-05	Pmm2	protein_coding
ENSMUSG00000027371	751.713	857.652	645.774	0.378832	0.0779847	4.64193	3.45162e-06	4.91258e-05	Fahd2a	protein_coding
ENSMUSG00000041920	867.138	735.872	998.405	-0.419171	0.0883848	-4.64029	3.47917e-06	4.94435e-05	Slc16a6	protein_coding
ENSMUSG00000028049	1533.68	1372.09	1695.27	-0.301356	0.0643674	-4.63705	3.53409e-06	5.01109e-05	Scamp3	protein_coding
ENSMUSG00000032254	178.338	136.861	219.816	-0.602388	0.127615	-4.63718	3.532e-06	5.01109e-05	Kif23	protein_coding
ENSMUSG00000069835	621.126	718.343	523.91	0.432086	0.0915238	4.63612	3.55016e-06	5.0301e-05	Sat2	protein_coding
ENSMUSG00000002102	4814.27	4332.82	5295.71	-0.288538	0.061806	-4.63367	3.59248e-06	5.08245e-05	Psmc3	protein_coding
ENSMUSG00000027469	346.773	282.427	411.12	-0.492295	0.10183	-4.63273	3.60875e-06	5.10165e-05	Tpx2	protein_coding
ENSMUSG00000039018	827.185	939.622	714.748	0.366659	0.0761262	4.63202	3.6211e-06	5.11145e-05	Mtg1	protein_coding
ENSMUSG00000021047	3557.8	3889.01	3226.6	0.264296	0.0564045	4.62798	3.69243e-06	5.20049e-05	Nova1	protein_coding
ENSMUSG00000053134	624.012	730.958	517.066	0.466791	0.0993937	4.62808	3.69078e-06	5.20049e-05	Supt7l	protein_coding
ENSMUSG00000002808	1521.18	1327.22	1715.13	-0.364484	0.0783563	-4.62747	3.70152e-06	5.20942e-05	Epdr1	protein_coding
ENSMUSG00000020893	2224.97	2481.77	1968.16	0.335129	0.0725956	4.62634	3.72176e-06	5.23401e-05	Per1	protein_coding
ENSMUSG00000005871	63528.7	56290.8	70766.7	-0.338303	0.0739035	-4.62276	3.78668e-06	5.31739e-05	Apc	protein_coding
ENSMUSG00000038658	3361.56	3670.23	3052.88	0.259738	0.0554527	4.6221	3.79877e-06	5.3304e-05	Ric1	protein_coding
ENSMUSG00000011306	2310.83	2526.34	2095.33	0.27615	0.0597708	4.62155	3.80886e-06	5.33345e-05	Sugp1	protein_coding
ENSMUSG00000027858	3099.73	2543.92	3655.53	-0.487704	0.104033	-4.62152	3.80941e-06	5.33345e-05	Tspan2	protein_coding
ENSMUSG00000028278	5918.67	5327.18	6510.16	-0.285027	0.0609817	-4.6217	3.80607e-06	5.33345e-05	Rragd	protein_coding
ENSMUSG00000026843	2202.02	2418.74	1985.3	0.280157	0.0598454	4.62054	3.82746e-06	5.35476e-05	Fubp3	protein_coding
ENSMUSG00000029314	95.1622	68.1799	122.144	-0.694089	0.14812	-4.61979	3.84128e-06	5.37012e-05	Gpat3	protein_coding
ENSMUSG00000037447	447.017	516.895	377.138	0.424133	0.0891648	4.61674	3.89818e-06	5.44162e-05	Arid5a	protein_coding
ENSMUSG00000034636	15358.4	14135	16581.8	-0.237468	0.0514194	-4.61485	3.93385e-06	5.48736e-05	Zyg11b	protein_coding
ENSMUSG00000026280	2711.31	2962.54	2460.08	0.264563	0.0566445	4.6146	3.93849e-06	5.48978e-05	Atg4b	protein_coding
ENSMUSG00000050312	669.379	782.316	556.442	0.454353	0.0944503	4.61166	3.99468e-06	5.5558e-05	Nsun3	protein_coding
ENSMUSG00000039201	467.178	386	548.355	-0.470963	0.0995401	-4.61029	4.02116e-06	5.58852e-05	Tbc1d25	protein_coding
ENSMUSG00000027465	2880.85	3136.95	2624.75	0.253057	0.0542913	4.60759	4.07355e-06	5.65718e-05	Tbc1d20	protein_coding
ENSMUSG00000008604	3329.93	2954.3	3705.55	-0.306302	0.0646196	-4.60302	4.16417e-06	5.77878e-05	Ubqln4	protein_coding
ENSMUSG00000004221	2001.34	2197.43	1805.25	0.282995	0.0610224	4.60064	4.21203e-06	5.83662e-05	Ikbkg	protein_coding
ENSMUSG00000056612	250.68	201.342	300.018	-0.523734	0.112773	-4.59833	4.25886e-06	5.8972e-05	Ppp1r14b	protein_coding
ENSMUSG00000059743	223.319	173.9	272.738	-0.573729	0.124897	-4.59809	4.2639e-06	5.89985e-05	Fdps	protein_coding
ENSMUSG00000023755	276.512	226.095	326.93	-0.493756	0.107857	-4.59201	4.38988e-06	6.06085e-05	Rhebl1	protein_coding
ENSMUSG00000039233	2723.53	3064.7	2382.37	0.367107	0.0809504	4.59104	4.41044e-06	6.08036e-05	Tbce	protein_coding
ENSMUSG00000020150	251.561	198.052	305.07	-0.56364	0.120776	-4.59026	4.42701e-06	6.09876e-05	Gamt	protein_coding
ENSMUSG00000034432	3059.99	3343.98	2776	0.264065	0.0568484	4.58789	4.47749e-06	6.1638e-05	Cops8	protein_coding
ENSMUSG00000007739	3806.54	3467.71	4145.36	-0.260087	0.0564735	-4.5854	4.53113e-06	6.2331e-05	Cct4	protein_coding
ENSMUSG00000039361	9298.16	8503.75	10092.6	-0.248067	0.0537754	-4.58373	4.56746e-06	6.27852e-05	Picalm	protein_coding
ENSMUSG00000028284	4156.89	4576.62	3737.15	0.279752	0.0597805	4.5833	4.57691e-06	6.28693e-05	Map3k7	protein_coding
ENSMUSG00000036833	375.995	437.933	314.058	0.445073	0.0928364	4.5804	4.64077e-06	6.37002e-05	Pnpla7	protein_coding
ENSMUSG00000002017	2038.5	1801.93	2275.07	-0.318873	0.0678539	-4.57954	4.65994e-06	6.38243e-05	Fam98a	protein_coding
ENSMUSG00000025986	7040.48	6408.87	7672.09	-0.26716	0.0583908	-4.57965	4.65747e-06	6.38243e-05	Slc39a10	protein_coding
ENSMUSG00000030337	2223.5	2510.99	1936.01	0.367756	0.0800573	4.57972	4.65592e-06	6.38243e-05	Vamp1	protein_coding
ENSMUSG00000003500	3675.96	3234.74	4117.18	-0.332518	0.0710806	-4.57876	4.67741e-06	6.40172e-05	Impdh1	protein_coding
ENSMUSG00000022940	706.361	806.08	606.642	0.388295	0.0826562	4.57546	4.75173e-06	6.49872e-05	Pigp	protein_coding
ENSMUSG00000021665	3265.4	2866.57	3664.23	-0.35336	0.0773436	-4.57473	4.76838e-06	6.51534e-05	Hexb	protein_coding
ENSMUSG00000030649	850.199	964.437	735.961	0.368564	0.0782268	4.57394	4.78641e-06	6.53198e-05	Anapc15	protein_coding
ENSMUSG00000026663	2451.9	2763.32	2140.47	0.352966	0.0757432	4.57258	4.81744e-06	6.56958e-05	Atf6	protein_coding
ENSMUSG00000025959	5020.84	4422.64	5619.04	-0.335148	0.0722882	-4.56735	4.93934e-06	6.72127e-05	Klf7	protein_coding
ENSMUSG00000040570	2397.62	2127.09	2668.15	-0.320188	0.0692905	-4.5659	4.97355e-06	6.7581e-05	Rundc3b	protein_coding
ENSMUSG00000049288	1431.83	1246.36	1617.3	-0.348565	0.0736975	-4.56295	5.04406e-06	6.84406e-05	Lix1l	protein_coding
ENSMUSG00000031278	5584.33	5013.29	6155.37	-0.294286	0.0639964	-4.56196	5.06784e-06	6.86647e-05	Acsl4	protein_coding
ENSMUSG00000035355	498.828	401.81	595.846	-0.515371	0.108355	-4.55989	5.11799e-06	6.91954e-05	Kcnh4	protein_coding
ENSMUSG00000021250	726.036	871.97	580.101	0.538911	0.122013	4.55771	5.1714e-06	6.98675e-05	Fos	protein_coding
ENSMUSG00000001518	584.924	673.664	496.184	0.413082	0.0878381	4.55472	5.24545e-06	7.07668e-05	Itfg2	protein_coding
ENSMUSG00000045969	1117.08	972.696	1261.47	-0.361929	0.0783965	-4.55379	5.26877e-06	7.10306e-05	Ing1	protein_coding
ENSMUSG00000038552	4170.25	3725.36	4615.13	-0.30767	0.0672283	-4.55296	5.28976e-06	7.12123e-05	Fndc4	protein_coding
ENSMUSG00000041939	1132.98	1014.67	1251.29	-0.302503	0.0661845	-4.55295	5.28978e-06	7.12123e-05	Mvk	protein_coding
ENSMUSG00000026098	239.477	289.118	189.836	0.539755	0.112096	4.55258	5.29911e-06	7.12871e-05	Pms1	protein_coding
ENSMUSG00000006464	2680.1	2921.12	2439.09	0.258696	0.0563549	4.55101	5.33881e-06	7.17192e-05	Bbs1	protein_coding
ENSMUSG00000039676	100.177	130.702	69.6523	0.727361	0.156798	4.54917	5.38591e-06	7.23005e-05	Capsl	protein_coding
ENSMUSG00000031776	5941.51	5352.84	6530.18	-0.279837	0.0606744	-4.54663	5.45117e-06	7.31246e-05	Arl2bp	protein_coding
ENSMUSG00000019487	241.195	191.532	290.858	-0.534807	0.110682	-4.54009	5.62313e-06	7.5271e-05	Trip10	protein_coding
ENSMUSG00000032911	999.107	870.62	1127.59	-0.352521	0.0754888	-4.53991	5.62788e-06	7.52813e-05	Cspg4	protein_coding
ENSMUSG00000042997	678.55	761.854	595.246	0.349114	0.0760699	4.53877	5.65825e-06	7.56341e-05	Nhlrc3	protein_coding
ENSMUSG00000035847	24298.4	22041.3	26555.5	-0.266723	0.0582291	-4.53766	5.68811e-06	7.59794e-05	Ids	protein_coding
ENSMUSG00000032528	1141.91	1334.5	949.324	0.462467	0.101913	4.53213	5.83922e-06	7.78879e-05	Vipr1	protein_coding
ENSMUSG00000030127	3958.51	4415.3	3501.73	0.331028	0.07285	4.52793	5.9563e-06	7.92817e-05	Cops7a	protein_coding
ENSMUSG00000042354	1409.05	1253.18	1564.92	-0.30695	0.0663344	-4.52693	5.98457e-06	7.9602e-05	Gnl3	protein_coding
ENSMUSG00000022365	1560.15	1711.37	1408.92	0.279375	0.0611575	4.52567	6.02052e-06	8.00238e-05	Derl1	protein_coding
ENSMUSG00000031155	977.256	848.02	1106.49	-0.35827	0.0763824	-4.52316	6.09242e-06	8.09226e-05	Pim2	protein_coding
ENSMUSG00000023980	697.769	787.304	608.234	0.365114	0.0805699	4.52299	6.09717e-06	8.09287e-05	Taf8	protein_coding
ENSMUSG00000030180	2201.09	2411.4	1990.79	0.26909	0.0585713	4.5183	6.23376e-06	8.24522e-05	Kdm5a	protein_coding
ENSMUSG00000030987	3724.69	4087.21	3362.18	0.273835	0.0597112	4.51732	6.26286e-06	8.27793e-05	Stim1	protein_coding
ENSMUSG00000025757	6366.31	5780.01	6952.61	-0.260645	0.0569216	-4.5162	6.29601e-06	8.31593e-05	Hspa4l	protein_coding
ENSMUSG00000061759	765.668	866.96	664.375	0.368797	0.0806532	4.50744	6.5615e-06	8.64244e-05	Armt1	protein_coding
ENSMUSG00000025762	717.282	612.411	822.153	-0.405137	0.0886471	-4.50584	6.61099e-06	8.69549e-05	Larp1b	protein_coding
ENSMUSG00000015981	2841.56	2557.61	3125.52	-0.286586	0.0629987	-4.50492	6.63967e-06	8.72716e-05	Stk32c	protein_coding
ENSMUSG00000011658	527.672	609.129	446.215	0.42348	0.091655	4.5022	6.72531e-06	8.83357e-05	Fuz	protein_coding
ENSMUSG00000032507	2628.54	2371.9	2885.19	-0.278994	0.0613534	-4.49987	6.79944e-06	8.92474e-05	Fbxl2	protein_coding
ENSMUSG00000020171	2189.67	2408.7	1970.64	0.27452	0.0595448	4.49446	6.97481e-06	9.14222e-05	Yeats4	protein_coding
ENSMUSG00000026889	3050.83	3374.33	2727.32	0.295424	0.0645087	4.49254	7.03789e-06	9.21214e-05	Rbm18	protein_coding
ENSMUSG00000022665	939.278	778.533	1100.02	-0.462793	0.100906	-4.49136	7.07691e-06	9.2568e-05	Ccdc80	protein_coding
ENSMUSG00000027291	2953.89	3213.46	2694.32	0.254451	0.0563277	4.48864	7.1678e-06	9.36849e-05	Vps39	protein_coding
ENSMUSG00000042417	41.207	57.8945	24.5195	0.81742	0.182029	4.48851	7.17222e-06	9.36849e-05	Ccno	protein_coding
ENSMUSG00000029233	698.389	792.592	604.186	0.370459	0.0806201	4.48762	7.20244e-06	9.40147e-05	Srd5a3	protein_coding
ENSMUSG00000024072	1662.33	1868.95	1455.71	0.33886	0.0733293	4.48746	7.2079e-06	9.40211e-05	Yipf4	protein_coding
ENSMUSG00000056698	644.017	724.455	563.579	0.353886	0.0781651	4.48677	7.23117e-06	9.42596e-05	Elmod3	protein_coding
ENSMUSG00000020315	52917.5	48107.6	57727.5	-0.254667	0.0558995	-4.48558	7.27153e-06	9.47203e-05	Sptbn1	protein_coding
ENSMUSG00000026643	4654.55	4268.26	5040.84	-0.227657	0.0498076	-4.48454	7.30713e-06	9.51185e-05	Nmt2	protein_coding
ENSMUSG00000037805	580.012	497.184	662.84	-0.39687	0.0875115	-4.48185	7.4e-06	9.61288e-05	Rpl10a	protein_coding
ENSMUSG00000069114	738.889	647.172	830.606	-0.347985	0.076431	-4.48074	7.43863e-06	9.65642e-05	Zbtb10	protein_coding
ENSMUSG00000071369	1765.89	1542.28	1989.51	-0.34724	0.0752257	-4.4794	7.48519e-06	9.7102e-05	Map3k5	protein_coding
ENSMUSG00000027650	784.664	878.112	691.216	0.343149	0.0766199	4.47655	7.5858e-06	9.83396e-05	Tti1	protein_coding
ENSMUSG00000018401	4102.22	3645.27	4559.18	-0.30449	0.0661955	-4.4762	7.59827e-06	9.84338e-05	Mtmr4	protein_coding
ENSMUSG00000062373	5937.79	5389.64	6485.94	-0.266987	0.0592373	-4.47579	7.61293e-06	9.85562e-05	Tmem65	protein_coding
ENSMUSG00000051235	190.928	234.293	147.564	0.584612	0.123263	4.47504	7.63977e-06	9.88359e-05	Gen1	protein_coding
ENSMUSG00000018548	15943.9	14528.6	17359.1	-0.26031	0.0580096	-4.47297	7.71396e-06	9.97274e-05	Trim37	protein_coding
ENSMUSG00000013629	884.098	750.961	1017.24	-0.408491	0.0885943	-4.47273	7.72287e-06	9.97744e-05	Cad	protein_coding
ENSMUSG00000030752	150.923	191.814	110.032	0.662108	0.141378	4.47243	7.73363e-06	9.98452e-05	Kdm8	protein_coding
ENSMUSG00000092274	921.41	1054.78	788.041	0.40098	0.0876634	4.46835	7.88251e-06	0.000101628	Neat1	lincRNA
ENSMUSG00000032366	8035.73	7394.4	8677.07	-0.232141	0.0516295	-4.46766	7.90806e-06	0.000101888	Tpm1	protein_coding
ENSMUSG00000024776	579.49	501.867	657.113	-0.376321	0.0835448	-4.4661	7.96593e-06	0.000102494	Stambpl1	protein_coding
ENSMUSG00000020986	6198.36	5677.21	6719.5	-0.247458	0.0552618	-4.465	8.00703e-06	0.000102953	Sec23a	protein_coding
ENSMUSG00000025465	1612.46	1449.29	1775.62	-0.291757	0.0649628	-4.46392	8.04741e-06	0.000103402	Echs1	protein_coding
ENSMUSG00000040022	4439.64	4915.03	3964.24	0.297503	0.0652936	4.46265	8.09523e-06	0.000103946	Rab11fip2	protein_coding
ENSMUSG00000052915	7833.8	7188.68	8478.91	-0.23489	0.0521432	-4.45778	8.28118e-06	0.000106189	Msl1	protein_coding
ENSMUSG00000020917	7238.1	6433.9	8042.3	-0.306914	0.0673154	-4.45556	8.36732e-06	0.000107221	Acly	protein_coding
ENSMUSG00000025993	962.306	841.361	1083.25	-0.344691	0.0753543	-4.45281	8.47555e-06	0.000108463	Slc40a1	protein_coding
ENSMUSG00000039886	457.493	382.952	532.034	-0.442579	0.097567	-4.45266	8.48144e-06	0.000108463	Tmem120a	protein_coding
ENSMUSG00000040451	1034.36	1159.89	908.827	0.334222	0.0730722	4.44854	8.64575e-06	0.00011034	Sgms1	protein_coding
ENSMUSG00000028364	2310.51	1897.51	2723.51	-0.47079	0.100818	-4.44797	8.66869e-06	0.000110558	Tnc	protein_coding
ENSMUSG00000020230	2716.87	2394.45	3039.29	-0.332841	0.0736979	-4.44775	8.6775e-06	0.000110596	Prmt2	protein_coding
ENSMUSG00000002767	838.94	950.115	727.765	0.36402	0.0793592	4.44686	8.71347e-06	0.000110926	Mrpl2	protein_coding
ENSMUSG00000031819	3102.45	3388.08	2816.81	0.251641	0.0553078	4.44682	8.71516e-06	0.000110926	Emc8	protein_coding
ENSMUSG00000062762	6215.5	6761.57	5669.42	0.243538	0.0537827	4.44566	8.76215e-06	0.000111449	Ei24	protein_coding
ENSMUSG00000026404	498.921	583.591	414.251	0.44276	0.0926413	4.44492	8.7925e-06	0.000111685	Ddx59	protein_coding
ENSMUSG00000031930	1566.89	1721	1412.79	0.2877	0.0646543	4.44445	8.81155e-06	0.000111852	Wwp2	protein_coding
ENSMUSG00000024795	142.973	108.423	177.523	-0.609542	0.130368	-4.44369	8.8428e-06	0.000112173	Kif20b	protein_coding
ENSMUSG00000028034	6956.32	6401.32	7511.32	-0.2188	0.048358	-4.44269	8.88427e-06	0.000112548	Fubp1	protein_coding
ENSMUSG00000028868	983.819	847.533	1120.11	-0.37705	0.0823939	-4.44005	8.99363e-06	0.000113781	Wasf2	protein_coding
ENSMUSG00000004846	1222.05	1064.52	1379.58	-0.356439	0.0786742	-4.43971	9.00813e-06	0.000113888	Plod3	protein_coding
ENSMUSG00000037143	215.004	260.58	169.428	0.547921	0.119758	4.43955	9.01463e-06	0.000113894	Cfap61	protein_coding
ENSMUSG00000028551	185.907	146.693	225.121	-0.551249	0.123161	-4.43928	9.02619e-06	0.000113964	Cdkn2c	protein_coding
ENSMUSG00000020186	556.471	472.598	640.345	-0.41216	0.0912151	-4.43875	9.0481e-06	0.000114164	Csrp2	protein_coding
ENSMUSG00000006638	295.88	232.422	359.337	-0.559955	0.135728	-4.43739	9.10555e-06	0.0001147	Abhd1	processed_transcript
ENSMUSG00000032064	4837.5	4431.43	5243.56	-0.254587	0.0577238	-4.43731	9.1088e-06	0.0001147	Dixdc1	protein_coding
ENSMUSG00000060371	14345	12724.5	15965.6	-0.32236	0.0720172	-4.43681	9.13003e-06	0.000114891	Caln1	protein_coding
ENSMUSG00000027164	1013.48	1126.7	900.254	0.321306	0.0719285	4.43596	9.1663e-06	0.000115271	Traf6	protein_coding
ENSMUSG00000031709	5773.58	5310.53	6236.63	-0.237466	0.0535	-4.43202	9.33527e-06	0.000117162	Tbc1d9	protein_coding
ENSMUSG00000029036	1481.88	1305.6	1658.17	-0.327815	0.0721165	-4.43019	9.41516e-06	0.000118086	Atad3a	protein_coding
ENSMUSG00000030695	15622.1	13670.1	17574.2	-0.338531	0.0739479	-4.42982	9.43116e-06	0.000118208	Aldoa	protein_coding
ENSMUSG00000071253	2067.7	2324.32	1811.07	0.337316	0.0738328	4.4266	9.57305e-06	0.000119907	Slc25a16	protein_coding
ENSMUSG00000047921	2158.06	2456.87	1859.25	0.387388	0.0868624	4.42269	9.7478e-06	0.000122015	Trappc9	protein_coding
ENSMUSG00000022837	1013.84	1127.69	899.987	0.314263	0.0697469	4.41883	9.92363e-06	0.000124052	Iqcb1	protein_coding
ENSMUSG00000002329	1356.56	1214.16	1498.95	-0.306956	0.0696386	-4.41852	9.93786e-06	0.000124148	Mdp1	protein_coding
ENSMUSG00000040033	1293.99	1151.18	1436.8	-0.309047	0.0688309	-4.41356	1.01685e-05	0.000126862	Stat2	protein_coding
ENSMUSG00000075703	3729.6	3377.26	4081.93	-0.264732	0.0589476	-4.41189	1.02472e-05	0.000127759	Selenoi	protein_coding
ENSMUSG00000022338	3571.75	3873.09	3270.42	0.240378	0.0538274	4.41066	1.03055e-05	0.000128316	Eny2	protein_coding
ENSMUSG00000026341	3339.45	3035.93	3642.98	-0.25305	0.0563585	-4.40962	1.03553e-05	0.000128851	Actr3	protein_coding
ENSMUSG00000063894	1403.53	1562.99	1244.08	0.323907	0.0726744	4.40869	1.03999e-05	0.000129321	Zkscan8	protein_coding
ENSMUSG00000039449	2419.13	2623.66	2214.6	0.248325	0.0561174	4.40787	1.0439e-05	0.000129517	Prpf18	protein_coding
ENSMUSG00000058558	2332.38	2635.66	2029.1	0.357623	0.0789683	4.40795	1.04356e-05	0.000129517	Rpl5	protein_coding
ENSMUSG00000039166	4852.62	4259.71	5445.53	-0.355498	0.0813825	-4.40663	1.04989e-05	0.000130125	Akap7	protein_coding
ENSMUSG00000038418	5216.79	5957.47	4476.12	0.405622	0.0939959	4.40644	1.05083e-05	0.000130156	Egr1	protein_coding
ENSMUSG00000027575	3970.17	4321.46	3618.88	0.259677	0.0587918	4.40549	1.05546e-05	0.000130558	Arfgap1	protein_coding
ENSMUSG00000040327	2178.01	2430.65	1925.36	0.338171	0.0773617	4.40346	1.06538e-05	0.000131671	Cul9	protein_coding
ENSMUSG00000030272	3505.52	3212.55	3798.5	-0.243005	0.0548463	-4.40312	1.06705e-05	0.000131732	Camk1	protein_coding
ENSMUSG00000095567	2864.54	2535.69	3193.39	-0.305802	0.0668243	-4.40146	1.07523e-05	0.000132483	Noc2l	protein_coding
ENSMUSG00000028849	8342.42	7499.86	9184.98	-0.273451	0.0604416	-4.4	1.08253e-05	0.000133209	Map7d1	protein_coding
ENSMUSG00000004837	275.214	220.551	329.877	-0.524618	0.116739	-4.39871	1.08897e-05	0.000133914	Grap	protein_coding
ENSMUSG00000034275	5441.1	4901.82	5980.38	-0.266998	0.0589513	-4.39798	1.09265e-05	0.000134193	Igsf9b	protein_coding
ENSMUSG00000004508	1189.95	1044.63	1335.26	-0.343648	0.0772597	-4.3977	1.09407e-05	0.000134279	Gab2	protein_coding
ENSMUSG00000036986	509.912	580.957	438.867	0.390256	0.0887218	4.39747	1.09522e-05	0.000134333	Pml	protein_coding
ENSMUSG00000003949	4817.22	5468.63	4165.8	0.382378	0.0869697	4.39699	1.09761e-05	0.000134451	Hlf	protein_coding
ENSMUSG00000041303	1462.26	1605.6	1318.92	0.281158	0.0633876	4.39707	1.09722e-05	0.000134451	Gtf3c3	protein_coding
ENSMUSG00000097039	569.674	490.839	648.51	-0.393944	0.0906626	-4.39452	1.11015e-05	0.000135812	Pvt1	lincRNA
ENSMUSG00000040631	2345.18	2017.47	2672.88	-0.394221	0.0899279	-4.39435	1.11107e-05	0.000135836	Dok4	protein_coding
ENSMUSG00000074781	4640.73	5036.6	4244.86	0.241216	0.0541716	4.3931	1.11746e-05	0.000136529	Ube2n	protein_coding
ENSMUSG00000035722	810.136	707.111	913.161	-0.350595	0.0777567	-4.39101	1.12824e-05	0.000137758	Abca7	protein_coding
ENSMUSG00000009566	403.94	334.667	473.213	-0.457853	0.101579	-4.38922	1.13759e-05	0.00013881	Fpgs	protein_coding
ENSMUSG00000047648	409.317	342.173	476.461	-0.446159	0.0997315	-4.38758	1.14618e-05	0.000139768	Fbxo30	protein_coding
ENSMUSG00000024758	48287.5	43912	52663.1	-0.244644	0.0544153	-4.38515	1.15904e-05	0.000141153	Rtn3	protein_coding
ENSMUSG00000037833	51.977	31.4841	72.4698	-0.799989	0.180731	-4.38267	1.17231e-05	0.000142586	Sh2d4b	protein_coding
ENSMUSG00000061650	1354.36	1495.36	1213.36	0.295376	0.066611	4.38272	1.17206e-05	0.000142586	Med9	protein_coding
ENSMUSG00000039904	654.135	561.825	746.445	-0.387246	0.0858024	-4.38197	1.17611e-05	0.000142864	Gpr37	protein_coding
ENSMUSG00000024030	1075.25	1218.72	931.787	0.375097	0.0852302	4.38034	1.18493e-05	0.000143661	Abcg1	protein_coding
ENSMUSG00000037544	65.656	44.424	86.8881	-0.741264	0.163403	-4.38034	1.18495e-05	0.000143661	Dlgap5	protein_coding
ENSMUSG00000040701	605.594	690.149	521.038	0.3886	0.0866932	4.38038	1.1847e-05	0.000143661	Ap1g2	protein_coding
ENSMUSG00000059518	1141.54	966.333	1316.75	-0.422775	0.0953284	-4.37905	1.19197e-05	0.00014442	Znhit1	protein_coding
ENSMUSG00000039976	5990.45	5142.46	6838.45	-0.398395	0.09095	-4.37757	1.2001e-05	0.000145311	Tbc1d16	protein_coding
ENSMUSG00000020250	2806.79	2555.19	3058.38	-0.25278	0.0569513	-4.37624	1.20746e-05	0.000146109	Txnrd1	protein_coding
ENSMUSG00000027209	129.499	93.7068	165.291	-0.660535	0.150836	-4.37271	1.22715e-05	0.000148018	Fam227b	protein_coding
ENSMUSG00000015095	4207.6	4609.19	3806.01	0.267604	0.060266	4.36942	1.24575e-05	0.000150166	Fbxw5	protein_coding
ENSMUSG00000020897	96.2179	68.9729	123.463	-0.675178	0.153912	-4.36783	1.25489e-05	0.000151171	Aurkb	protein_coding
ENSMUSG00000020228	289.378	339.649	239.107	0.467138	0.103952	4.36054	1.29744e-05	0.000155998	Helb	protein_coding
ENSMUSG00000024878	670.93	777.132	564.728	0.423333	0.0927769	4.36056	1.2973e-05	0.000155998	Cbwd1	protein_coding
ENSMUSG00000022681	1390.61	1256.64	1524.59	-0.288327	0.0667384	-4.35968	1.30252e-05	0.000156509	Ntan1	protein_coding
ENSMUSG00000023505	163.835	126.33	201.339	-0.580121	0.130876	-4.35813	1.31178e-05	0.000157422	Cdca3	protein_coding
ENSMUSG00000039982	4431.97	3978.29	4885.65	-0.291631	0.0662871	-4.35623	1.32321e-05	0.000158692	Dtx4	protein_coding
ENSMUSG00000018678	500.882	577.346	424.419	0.429258	0.101468	4.35493	1.33109e-05	0.000159536	Sp2	protein_coding
ENSMUSG00000025938	506.593	406.967	606.218	-0.511705	0.112361	-4.35398	1.33688e-05	0.000160129	Slco5a1	protein_coding
ENSMUSG00000028136	6062.19	5601.98	6522.41	-0.212969	0.0482884	-4.35251	1.34589e-05	0.000161106	Snx27	protein_coding
ENSMUSG00000024598	507.331	415.266	599.396	-0.487519	0.11221	-4.3462	1.38518e-05	0.000165495	Fbn2	protein_coding
ENSMUSG00000003062	1652.9	1494.06	1811.75	-0.275633	0.0628083	-4.34479	1.39407e-05	0.000166447	Stard3nl	protein_coding
ENSMUSG00000024891	573.996	481.153	666.839	-0.428497	0.0939301	-4.34466	1.39491e-05	0.000166447	Slc29a2	protein_coding
ENSMUSG00000035596	4163.7	3627	4700.39	-0.335993	0.0733075	-4.34149	1.41517e-05	0.000168757	Mboat7	protein_coding
ENSMUSG00000049287	492.802	560.058	425.546	0.380307	0.0862633	4.34135	1.4161e-05	0.000168762	Iba57	protein_coding
ENSMUSG00000048807	1015.78	874.866	1156.69	-0.381453	0.0860495	-4.34074	1.42006e-05	0.000169128	Slc35e4	protein_coding
ENSMUSG00000022905	6346.06	6902.15	5789.97	0.244101	0.0552874	4.3401	1.42418e-05	0.000169511	Kpna1	protein_coding
ENSMUSG00000025151	18247.8	16160.9	20334.8	-0.31245	0.0700352	-4.33923	1.42984e-05	0.000169971	Maged1	protein_coding
ENSMUSG00000032621	4826.43	5227.51	4425.35	0.245057	0.0563552	4.33928	1.42953e-05	0.000169971	Srek1	protein_coding
ENSMUSG00000020231	3314.46	2978.55	3650.37	-0.281998	0.0638013	-4.33337	1.46843e-05	0.000173903	Dip2a	protein_coding
ENSMUSG00000024158	2232.18	2512.06	1952.29	0.336953	0.0748858	4.33308	1.47039e-05	0.000174025	Hagh	protein_coding
ENSMUSG00000079469	997.578	1103.09	892.062	0.313455	0.0732581	4.32955	1.49411e-05	0.000176502	Pigb	protein_coding
ENSMUSG00000046994	1918.17	1723.43	2112.9	-0.28944	0.0662302	-4.3264	1.51568e-05	0.000178937	Mars2	protein_coding
ENSMUSG00000020782	40.2464	57.0482	23.4447	0.82692	0.184657	4.32607	1.51791e-05	0.000179088	Llgl2	protein_coding
ENSMUSG00000020758	222.216	173.554	270.878	-0.561301	0.129663	-4.32564	1.52092e-05	0.000179332	Itgb4	protein_coding
ENSMUSG00000089872	1920.01	1756.32	2083.7	-0.252263	0.0582555	-4.32414	1.53129e-05	0.000180442	Rps6kc1	protein_coding
ENSMUSG00000070808	955.06	819.338	1090.78	-0.376811	0.0828751	-4.31956	1.56343e-05	0.000183771	Bicra	protein_coding
ENSMUSG00000028795	1417.92	1211.47	1624.36	-0.399502	0.0907463	-4.31803	1.57426e-05	0.000184929	Ccdc28b	protein_coding
ENSMUSG00000062257	16958.8	15379.1	18538.5	-0.260094	0.0591955	-4.31774	1.57636e-05	0.000185061	Opcml	protein_coding
ENSMUSG00000026470	2953.36	3212.49	2694.22	0.245428	0.0559334	4.31622	1.58724e-05	0.000186107	Stx6	protein_coding
ENSMUSG00000036769	904.09	787.263	1020.92	-0.354795	0.0799041	-4.31476	1.59776e-05	0.000187224	Wdr44	protein_coding
ENSMUSG00000056952	1884.87	1696.68	2073.07	-0.288921	0.0666838	-4.31313	1.60963e-05	0.000188382	Tatdn2	protein_coding
ENSMUSG00000062127	1848.75	1652.8	2044.71	-0.294448	0.0668974	-4.31326	1.60864e-05	0.000188382	Cttnbp2nl	protein_coding
ENSMUSG00000019823	703.749	595.382	812.116	-0.42776	0.100732	-4.31239	1.615e-05	0.000188776	Mical1	protein_coding
ENSMUSG00000036764	245.695	294.901	196.488	0.519358	0.112474	4.31246	1.61448e-05	0.000188776	Dnajc12	protein_coding
ENSMUSG00000089682	4459.4	4823.23	4095.56	0.234048	0.0537544	4.31148	1.62162e-05	0.000189433	Bcl2l2	protein_coding
ENSMUSG00000030268	2835.41	2504.07	3166.74	-0.313729	0.0701299	-4.31102	1.62506e-05	0.000189718	Bcat1	protein_coding
ENSMUSG00000035517	1403.92	1252.53	1555.3	-0.300667	0.0682729	-4.31001	1.63246e-05	0.000190464	Tdrd7	protein_coding
ENSMUSG00000019796	6692.01	7341.12	6042.9	0.272945	0.0623913	4.30883	1.64121e-05	0.000191367	Lrp11	protein_coding
ENSMUSG00000022217	608.129	516.802	699.456	-0.410042	0.0933776	-4.30847	1.64385e-05	0.000191556	Emc9	protein_coding
ENSMUSG00000051864	965.76	1077	854.526	0.323847	0.0742942	4.30556	1.66562e-05	0.000193973	Tbc1d22a	protein_coding
ENSMUSG00000048915	1250.84	1114.02	1387.66	-0.305734	0.0697589	-4.30399	1.67746e-05	0.000195112	Efna5	protein_coding
ENSMUSG00000005683	11237.3	10088	12386.6	-0.273402	0.0614802	-4.30228	1.6905e-05	0.000196387	Cs	protein_coding
ENSMUSG00000017386	1077.75	956.565	1198.94	-0.322045	0.0747489	-4.3023	1.69033e-05	0.000196387	Traf4	protein_coding
ENSMUSG00000032393	10262.6	11243.9	9281.18	0.262665	0.0596626	4.30203	1.69243e-05	0.00019649	Dpp8	protein_coding
ENSMUSG00000069565	1880.59	1669.06	2092.12	-0.30276	0.0680344	-4.30055	1.70374e-05	0.000197682	Dazap1	protein_coding
ENSMUSG00000026028	10589.9	9590.81	11589	-0.279881	0.0653663	-4.29878	1.71737e-05	0.00019902	Trak2	protein_coding
ENSMUSG00000030536	1985.92	1767.96	2203.88	-0.292366	0.0655073	-4.29588	1.74001e-05	0.000201396	Iqgap1	protein_coding
ENSMUSG00000009640	942.297	1044.05	840.548	0.310358	0.071908	4.29297	1.76303e-05	0.000203437	Dmap1	protein_coding
ENSMUSG00000051890	1087.95	1241.33	934.579	0.383383	0.0869813	4.292	1.77069e-05	0.000204073	Klhdc1	protein_coding
ENSMUSG00000079685	58.4885	37.6836	79.2935	-0.756023	0.174106	-4.29105	1.77827e-05	0.00020482	Ulbp1	protein_coding
ENSMUSG00000029823	9965.25	10803.2	9127.3	0.245052	0.0568883	4.285	1.82737e-05	0.00021022	Luc7l2	protein_coding
ENSMUSG00000017716	131.955	103.52	160.391	-0.5541	0.132292	-4.28357	1.83918e-05	0.000211321	Birc5	protein_coding
ENSMUSG00000029761	1510.47	1313.05	1707.88	-0.357519	0.0812338	-4.28268	1.84658e-05	0.000212043	Cald1	protein_coding
ENSMUSG00000025809	6229.11	5634.91	6823.31	-0.272352	0.0629465	-4.28103	1.86026e-05	0.000213171	Itgb1	protein_coding
ENSMUSG00000026200	818.541	932.556	704.526	0.386385	0.0884727	4.28096	1.86092e-05	0.000213171	Glb1l	protein_coding
ENSMUSG00000028528	12317.4	11219.5	13415.4	-0.245044	0.0560426	-4.28132	1.85785e-05	0.000213171	Dnajc6	protein_coding
ENSMUSG00000062190	4990.04	4578.54	5401.54	-0.240142	0.0558481	-4.27689	1.89525e-05	0.00021671	Lancl2	protein_coding
ENSMUSG00000023328	2784.94	2482.25	3087.63	-0.316636	0.0743897	-4.27571	1.90526e-05	0.000217591	Ache	protein_coding
ENSMUSG00000000409	279.544	233.585	325.503	-0.447321	0.104234	-4.27256	1.93244e-05	0.000220429	Lck	protein_coding
ENSMUSG00000022791	4368.58	4775.75	3961.41	0.282384	0.0669864	4.27153	1.94136e-05	0.000221179	Tnk2	protein_coding
ENSMUSG00000019235	1586.67	1408.85	1764.49	-0.313369	0.0722002	-4.26873	1.96592e-05	0.000223707	Rps6kl1	protein_coding
ENSMUSG00000097769	328.258	268.229	388.286	-0.485945	0.112796	-4.26759	1.97595e-05	0.000224714	Snhg4	processed_transcript
ENSMUSG00000024063	2188.01	1966.99	2409.03	-0.289693	0.0673478	-4.26534	1.99594e-05	0.000226442	Lbh	protein_coding
ENSMUSG00000063694	456.204	389.571	522.836	-0.402433	0.0929688	-4.26489	2.00004e-05	0.000226772	Cycs	protein_coding
ENSMUSG00000065990	1864.19	2124.97	1603.4	0.375142	0.0842855	4.26383	2.00951e-05	0.000227709	Aurkaip1	protein_coding
ENSMUSG00000070420	380.016	434.498	325.534	0.39566	0.0912936	4.26114	2.03383e-05	0.00023005	Zscan25	protein_coding
ENSMUSG00000018417	2552.58	2302.74	2802.43	-0.263809	0.0600676	-4.25914	2.0521e-05	0.000231802	Myo1b	protein_coding
ENSMUSG00000039068	2597.32	2840.51	2354.14	0.265996	0.0617553	4.25918	2.05178e-05	0.000231802	Zzz3	protein_coding
ENSMUSG00000002908	1154.09	1023.63	1284.55	-0.322903	0.0752595	-4.25858	2.05725e-05	0.000232144	Kcnn1	protein_coding
ENSMUSG00000019809	1275.77	1417.36	1134.19	0.303404	0.0692389	4.25706	2.07134e-05	0.000233455	Pex3	protein_coding
ENSMUSG00000071350	299.889	349.498	250.279	0.44557	0.101173	4.25687	2.07309e-05	0.000233513	Setdb2	protein_coding
ENSMUSG00000022401	818.976	909.341	728.612	0.319652	0.0752411	4.25527	2.08799e-05	0.000235051	Xpnpep3	protein_coding
ENSMUSG00000021245	1262.55	1407.58	1117.51	0.311647	0.0708607	4.25132	2.12516e-05	0.000238809	Mlh3	protein_coding
ENSMUSG00000053897	587.407	501.262	673.552	-0.401436	0.0930331	-4.24789	2.15795e-05	0.00024235	Slc39a8	protein_coding
ENSMUSG00000032030	3610.2	3962.72	3257.69	0.269457	0.0620526	4.24596	2.17658e-05	0.000244297	Cul5	protein_coding
ENSMUSG00000033712	4007.79	4371.91	3643.67	0.267954	0.0631858	4.2451	2.18495e-05	0.000244945	Ccar2	protein_coding
ENSMUSG00000029911	819.356	914.53	724.182	0.328045	0.0762298	4.24371	2.19851e-05	0.00024632	Ssbp1	protein_coding
ENSMUSG00000031749	3880.53	3518.92	4242.15	-0.263788	0.0613406	-4.24284	2.20708e-05	0.000247133	St3gal2	protein_coding
ENSMUSG00000000282	1393.81	1217.55	1570.06	-0.349662	0.0808564	-4.24266	2.20883e-05	0.000247182	Mnt	protein_coding
ENSMUSG00000001891	2983.66	2613.32	3354	-0.350569	0.0819741	-4.24179	2.21746e-05	0.000248001	Ugp2	protein_coding
ENSMUSG00000025421	2851.98	3113.19	2590.77	0.264355	0.0619342	4.2413	2.22225e-05	0.00024839	Hdhd2	protein_coding
ENSMUSG00000078716	4143.53	4488.51	3798.56	0.234954	0.0546748	4.24066	2.22862e-05	0.000248955	Tmem8b	protein_coding
ENSMUSG00000036779	2138.06	2317.48	1958.64	0.244975	0.0575231	4.23847	2.25049e-05	0.000250805	Papd5	protein_coding
ENSMUSG00000045427	3097.38	3357.44	2837.33	0.244781	0.057462	4.23858	2.24936e-05	0.000250805	Hnrnph2	protein_coding
ENSMUSG00000022033	144.959	104.571	185.346	-0.659486	0.152245	-4.23705	2.26478e-05	0.000252249	Pbk	protein_coding
ENSMUSG00000025407	168.624	211.638	125.609	0.638622	0.13823	4.23604	2.275e-05	0.000253089	Gli1	protein_coding
ENSMUSG00000035776	6254.18	5494.51	7013.85	-0.339061	0.0787786	-4.23372	2.29861e-05	0.000255565	Cd99l2	protein_coding
ENSMUSG00000032172	5695.47	5159.14	6231.81	-0.26768	0.0625212	-4.23215	2.31463e-05	0.000257044	Olfm2	protein_coding
ENSMUSG00000038685	1367.5	1507.8	1227.2	0.293979	0.0689226	4.23127	2.32377e-05	0.000257907	Rtel1	protein_coding
ENSMUSG00000035173	2376.25	2146.29	2606.21	-0.285442	0.067708	-4.22928	2.34436e-05	0.00026004	Ccdc186	protein_coding
ENSMUSG00000008682	185.829	144.706	226.953	-0.56217	0.128695	-4.2287	2.3505e-05	0.000260499	Rpl10	protein_coding
ENSMUSG00000015357	1166.19	1289.28	1043.11	0.291045	0.0672448	4.2282	2.35568e-05	0.000260836	Clpx	protein_coding
ENSMUSG00000034098	1795.22	1592.97	1997.46	-0.310402	0.0716996	-4.22689	2.36945e-05	0.000262207	Fstl5	protein_coding
ENSMUSG00000021036	2551.91	2309.43	2794.4	-0.264327	0.0613923	-4.22574	2.38157e-05	0.000263394	Sptlc2	protein_coding
ENSMUSG00000042116	1015.93	875.066	1156.79	-0.375681	0.0861004	-4.22467	2.39288e-05	0.000264336	Vwa1	protein_coding
ENSMUSG00000032578	292.815	248.493	337.136	-0.429269	0.107551	-4.22369	2.40338e-05	0.000265185	Cish	protein_coding
ENSMUSG00000024870	5321.43	5812.42	4830.44	0.259942	0.0606975	4.22076	2.43476e-05	0.000268178	Rab1b	protein_coding
ENSMUSG00000035711	204.305	159.784	248.827	-0.556272	0.125787	-4.22056	2.43692e-05	0.000268259	Dok3	protein_coding
ENSMUSG00000029636	5270.89	5710.39	4831.39	0.237797	0.055704	4.2204	2.43872e-05	0.000268301	Wasf3	protein_coding
ENSMUSG00000068921	2772.56	3011.85	2533.28	0.24122	0.0562373	4.21863	2.45791e-05	0.000270255	Dap3	protein_coding
ENSMUSG00000038619	11326.2	12590.1	10062.3	0.309117	0.071734	4.2167	2.47907e-05	0.000272424	Ensa	protein_coding
ENSMUSG00000049303	932.518	1111.4	753.639	0.501961	0.116591	4.21647	2.4816e-05	0.000272543	Syt12	protein_coding
ENSMUSG00000038975	2001.07	1818.13	2184.02	-0.266914	0.0631939	-4.21321	2.51767e-05	0.000276184	Rabggtb	protein_coding
ENSMUSG00000019054	3240.2	3583.67	2896.72	0.287066	0.0660737	4.21194	2.53191e-05	0.000277585	Fis1	protein_coding
ENSMUSG00000037234	5114.98	4716.54	5513.42	-0.226788	0.0535595	-4.20829	2.57315e-05	0.000281943	Hook3	protein_coding
ENSMUSG00000005936	3907.12	3613.32	4200.92	-0.216935	0.0511611	-4.20736	2.58372e-05	0.000282937	Kctd20	protein_coding
ENSMUSG00000006494	2518.17	2736.87	2299.47	0.244908	0.0574704	4.20057	2.66245e-05	0.000290884	Pdk1	protein_coding
ENSMUSG00000024502	3895.67	3553.14	4238.2	-0.258175	0.0614035	-4.19924	2.67812e-05	0.000291753	Jakmip2	protein_coding
ENSMUSG00000041096	3192.1	2913.49	3470.7	-0.239355	0.0557611	-4.19794	2.69357e-05	0.000293098	Tspyl2	protein_coding
ENSMUSG00000070003	5200.1	5887.4	4512.8	0.367329	0.0865308	4.19626	2.71362e-05	0.000294941	Ssbp4	protein_coding
ENSMUSG00000037847	225.658	272.945	178.371	0.536779	0.119357	4.19509	2.72761e-05	0.00029612	Nmrk1	protein_coding
ENSMUSG00000022827	412.056	472.897	351.215	0.403411	0.0938098	4.19325	2.7498e-05	0.000298154	Rabl3	protein_coding
ENSMUSG00000104960	342.628	398.952	286.304	0.441742	0.101899	4.19062	2.78192e-05	0.000301282	Snhg8
ENSMUSG00000036896	974.651	866.543	1082.76	-0.317115	0.0755023	-4.18662	2.83137e-05	0.000305804	C1qc	protein_coding
ENSMUSG00000045822	317.182	257.846	376.519	-0.484532	0.109128	-4.1848	2.85413e-05	0.00030791	Zswim3	protein_coding
ENSMUSG00000090841	2702.75	2377.41	3028.08	-0.342939	0.0818395	-4.18367	2.86836e-05	0.000309269	Myl6	protein_coding
ENSMUSG00000029657	11322.5	10353	12292	-0.227989	0.0530065	-4.18262	2.88173e-05	0.000310357	Hsph1	protein_coding
ENSMUSG00000058503	1613.66	1781.1	1446.22	0.288062	0.0673905	4.1823	2.88579e-05	0.000310617	Fam133b	protein_coding
ENSMUSG00000020652	246.953	293.609	200.296	0.494619	0.11359	4.18192	2.89061e-05	0.000310958	Cenpo	protein_coding
ENSMUSG00000011254	668.259	753.546	582.972	0.338849	0.0770369	4.1808	2.9048e-05	0.000312308	Thg1l	protein_coding
ENSMUSG00000003153	7168.4	6377.99	7958.81	-0.291601	0.0669424	-4.17904	2.92744e-05	0.000314562	Slc2a3	protein_coding
ENSMUSG00000029029	747.422	833.638	661.205	0.332733	0.0801744	4.17835	2.93633e-05	0.000315338	Wrap73	protein_coding
ENSMUSG00000020109	1830.04	2032.65	1627.42	0.312181	0.0739749	4.17445	2.9871e-05	0.000320245	Dnajb12	protein_coding
ENSMUSG00000028793	2171.61	1927	2416.23	-0.319432	0.0758995	-4.17369	2.99701e-05	0.000321126	Rnf19b	protein_coding
ENSMUSG00000038936	2832.63	2590.58	3074.69	-0.246143	0.0584748	-4.17274	3.00962e-05	0.000322294	Sccpdh	protein_coding
ENSMUSG00000027584	1916.01	1736.69	2095.32	-0.272474	0.0651328	-4.17223	3.01629e-05	0.000322825	Oprl1	protein_coding
ENSMUSG00000029528	1436.96	1582.7	1291.23	0.293839	0.0702863	4.17123	3.02955e-05	0.000323694	Pxn	protein_coding
ENSMUSG00000046169	320.343	261.069	379.617	-0.483397	0.110096	-4.17088	3.03425e-05	0.000324014	Adamts6	protein_coding
ENSMUSG00000052040	4902.64	4383.79	5421.48	-0.284252	0.0658434	-4.17053	3.03891e-05	0.000324328	Klf13	protein_coding
ENSMUSG00000028085	871.468	982.725	760.21	0.348249	0.0811673	4.16895	3.06008e-05	0.000326219	Gatb	protein_coding
ENSMUSG00000025510	915.98	802.111	1029.85	-0.344177	0.0808697	-4.16869	3.06359e-05	0.000326409	Cd151	protein_coding
ENSMUSG00000028639	12045.6	10689	13402.3	-0.332697	0.0813635	-4.16262	3.14619e-05	0.000334267	Ybx1	protein_coding
ENSMUSG00000019978	8367.25	7694.33	9040.17	-0.227103	0.0538536	-4.16241	3.14913e-05	0.000334391	Epb41l2	protein_coding
ENSMUSG00000021982	2016.28	2216.55	1816.01	0.277367	0.0654801	4.1616	3.1602e-05	0.000335003	Cdadc1	protein_coding
ENSMUSG00000027379	94.5195	68.8339	120.205	-0.646351	0.152864	-4.15565	3.24358e-05	0.000343072	Bub1	protein_coding
ENSMUSG00000026675	1157.4	1046.56	1268.25	-0.275428	0.065747	-4.15542	3.24689e-05	0.00034323	Hsd17b7	protein_coding
ENSMUSG00000017858	1353.1	1487.18	1219.02	0.276474	0.0653297	4.15459	3.25871e-05	0.000344094	Ift52	protein_coding
ENSMUSG00000036985	3039.68	2736.86	3342.51	-0.272039	0.0636542	-4.15459	3.25866e-05	0.000344094	Zdhhc9	protein_coding
ENSMUSG00000031297	409.083	336.234	481.932	-0.469414	0.109751	-4.15327	3.27762e-05	0.000345704	Slc7a3	protein_coding
ENSMUSG00000001036	4868.49	4501.11	5235.87	-0.217745	0.0520365	-4.15016	3.32247e-05	0.000350045	Epn2	protein_coding
ENSMUSG00000031665	1157.85	1006.3	1309.4	-0.352382	0.081813	-4.14976	3.32822e-05	0.000350455	Sall1	protein_coding
ENSMUSG00000024112	3746.23	3241.74	4250.71	-0.366288	0.085797	-4.14805	3.3532e-05	0.000352889	Cacna1h	protein_coding
ENSMUSG00000038708	5328.46	5767.72	4889.2	0.242028	0.0582142	4.14671	3.37289e-05	0.000354764	Golga4	protein_coding
ENSMUSG00000040669	2938.79	3180.36	2697.21	0.239823	0.0576257	4.1436	3.419e-05	0.000359213	Phc1	protein_coding
ENSMUSG00000003849	139.051	169.46	108.642	0.555548	0.130698	4.14271	3.43226e-05	0.00036027	Nqo1	protein_coding
ENSMUSG00000033220	135.968	106.984	164.951	-0.541027	0.138559	-4.14267	3.43287e-05	0.00036027	Rac2	protein_coding
ENSMUSG00000020330	193.735	151.273	236.197	-0.555325	0.130219	-4.14162	3.44859e-05	0.000361518	Hmmr	protein_coding
ENSMUSG00000032575	1749.32	1549.58	1949.06	-0.334304	0.0818379	-4.14071	3.46238e-05	0.000362763	Manf	protein_coding
ENSMUSG00000026219	11286.2	12170.7	10401.7	0.230961	0.0556409	4.14033	3.46803e-05	0.000362952	Trip12	protein_coding
ENSMUSG00000033186	2379.21	2692.12	2066.3	0.356493	0.0832844	4.13951	3.48048e-05	0.000363853	Mzt1	protein_coding
ENSMUSG00000026888	1034.31	899.888	1168.72	-0.366901	0.0889078	-4.1392	3.48526e-05	0.00036415	Grb14	protein_coding
ENSMUSG00000006589	882.708	775.066	990.35	-0.347646	0.0843224	-4.13595	3.53494e-05	0.000369137	Aprt	protein_coding
ENSMUSG00000043323	2739.01	2997.7	2480.31	0.261527	0.0619009	4.13547	3.54233e-05	0.000369705	Fbrsl1	protein_coding
ENSMUSG00000022641	1004.7	1127.68	881.716	0.348808	0.0842621	4.13312	3.57878e-05	0.000373209	Bbx	protein_coding
ENSMUSG00000041642	27331.6	24099	30564.2	-0.338176	0.0818014	-4.13305	3.57986e-05	0.000373209	Kif21b	protein_coding
ENSMUSG00000003226	7049.31	7664.38	6434.24	0.248734	0.0595094	4.13269	3.58535e-05	0.000373576	Ranbp2	protein_coding
ENSMUSG00000005897	538.119	607.916	468.322	0.366073	0.0889387	4.12954	3.63494e-05	0.000378303	Nr2c1	protein_coding
ENSMUSG00000071636	113.84	142.442	85.2383	0.622293	0.140952	4.12942	3.63673e-05	0.000378303	Rimbp3	protein_coding
ENSMUSG00000056267	857.071	959.736	754.407	0.333647	0.0794104	4.1271	3.6737e-05	0.00038173	Cep70	protein_coding
ENSMUSG00000035960	1382.78	1248.97	1516.58	-0.278443	0.0671294	-4.12588	3.69312e-05	0.000383536	Apex1	protein_coding
ENSMUSG00000020629	1147.59	1290.17	1005	0.340434	0.0806213	4.12464	3.71309e-05	0.000385398	Adi1	protein_coding
ENSMUSG00000006932	30666.9	32728.1	28605.6	0.193907	0.0466928	4.12324	3.73586e-05	0.000387319	Ctnnb1	protein_coding
ENSMUSG00000022064	670.128	753.771	586.486	0.344025	0.0812341	4.12337	3.73375e-05	0.000387319	Pibf1	protein_coding
ENSMUSG00000022505	2116.53	1858.05	2375.01	-0.333913	0.0787017	-4.12299	3.73979e-05	0.000387319	Emp2	protein_coding
ENSMUSG00000071708	3083.17	2778.14	3388.2	-0.272477	0.0645559	-4.123	3.73969e-05	0.000387319	Sms	protein_coding
ENSMUSG00000019102	78.1655	101.948	54.3828	0.708969	0.157588	4.12286	3.74193e-05	0.000387329	Aldh3a1	protein_coding
ENSMUSG00000039943	2708.87	3009.6	2408.13	0.308056	0.0733137	4.12196	3.75661e-05	0.000388423	Plcb4	protein_coding
ENSMUSG00000047181	4094.03	3505.55	4682.52	-0.400617	0.0975574	-4.12108	3.77103e-05	0.000389618	Samd14	protein_coding
ENSMUSG00000020773	138.894	102.524	175.264	-0.630123	0.144049	-4.12071	3.77704e-05	0.000389896	Trim47	protein_coding
ENSMUSG00000038267	4700.59	4298.06	5103.12	-0.234732	0.0557394	-4.12029	3.78396e-05	0.000390396	Slc22a23	protein_coding
ENSMUSG00000025130	5326.49	4938.42	5714.56	-0.211657	0.051093	-4.11591	3.85652e-05	0.000397233	P4hb	protein_coding
ENSMUSG00000028221	1720.92	1566.59	1875.25	-0.257223	0.061916	-4.11563	3.86126e-05	0.000397503	Tmem55a	protein_coding
ENSMUSG00000056899	101.011	130.811	71.2114	0.693071	0.154203	4.11461	3.87835e-05	0.000399046	Immp2l	protein_coding
ENSMUSG00000031840	19788.3	21692.8	17883.8	0.280245	0.0681195	4.11253	3.91339e-05	0.000401776	Rab3a	protein_coding
ENSMUSG00000090112	3169.93	3443.43	2896.43	0.247668	0.0596895	4.11258	3.91258e-05	0.000401776	Shprh	protein_coding
ENSMUSG00000028291	2287.35	2080.09	2494.61	-0.245295	0.0579957	-4.11184	3.92511e-05	0.00040276	Akirin2	protein_coding
ENSMUSG00000006304	9091.39	8404.42	9778.36	-0.218185	0.0526893	-4.10943	3.96635e-05	0.000406551	Arpc2	protein_coding
ENSMUSG00000021395	5865.88	5403.19	6328.58	-0.230423	0.0558066	-4.10944	3.96619e-05	0.000406551	Spin1	protein_coding
ENSMUSG00000007038	1681.76	1840.72	1522.8	0.265963	0.0637402	4.1074	4.00133e-05	0.000409692	Neu1	protein_coding
ENSMUSG00000020359	289.654	332.534	246.773	0.413359	0.101508	4.10694	4.00941e-05	0.000410297	Phykpl	protein_coding
ENSMUSG00000005610	46515.6	43081.4	49949.8	-0.216102	0.0523859	-4.10636	4.01936e-05	0.000411092	Eif4g2	protein_coding
ENSMUSG00000058690	7371.32	6814.12	7928.52	-0.225712	0.0550086	-4.10544	4.0354e-05	0.00041251	Ccser2	protein_coding
ENSMUSG00000027276	418.611	349.599	487.623	-0.435126	0.101687	-4.10427	4.05597e-05	0.000414388	Jag1	protein_coding
ENSMUSG00000033253	3075.48	3398.09	2752.87	0.300892	0.0728896	4.10332	4.07258e-05	0.000415861	Szt2	protein_coding
ENSMUSG00000022453	743.895	831.937	655.854	0.328707	0.0781621	4.10319	4.07493e-05	0.000415876	Naga	protein_coding
ENSMUSG00000036249	760.968	666.211	855.726	-0.354481	0.0871511	-4.1018	4.09956e-05	0.000418164	Rbm43	protein_coding
ENSMUSG00000035919	792.773	884.226	701.319	0.332414	0.0815233	4.10157	4.10357e-05	0.000418347	Bbs9	protein_coding
ENSMUSG00000046798	3159.19	3484.79	2833.58	0.283559	0.0674831	4.10036	4.12511e-05	0.000420317	Cldn12	protein_coding
ENSMUSG00000022780	45.3868	61.188	29.5856	0.724962	0.177474	4.099	4.1494e-05	0.000422336	Meltf	protein_coding
ENSMUSG00000007613	1652.3	1455.33	1849.28	-0.340265	0.0828991	-4.09883	4.1525e-05	0.000422424	Tgfbr1	protein_coding
ENSMUSG00000020733	1127.14	1005.12	1249.17	-0.297441	0.0707082	-4.09656	4.19326e-05	0.000426112	Slc9a3r1	protein_coding
ENSMUSG00000029310	1932.67	2158.46	1706.88	0.320675	0.0763458	4.09512	4.21951e-05	0.000428327	Nudt9	protein_coding
ENSMUSG00000029452	80.0586	103.273	56.8441	0.677185	0.156044	4.09397	4.24056e-05	0.000429994	Tmem116	protein_coding
ENSMUSG00000045259	137.515	169.484	105.545	0.581427	0.132275	4.09361	4.24708e-05	0.000430193	Klhdc9	protein_coding
ENSMUSG00000021044	1619.07	1781.57	1456.56	0.277223	0.0661263	4.09326	4.25349e-05	0.000430612	Adck1	protein_coding
ENSMUSG00000001946	665.809	585.309	746.309	-0.334381	0.0796616	-4.09297	4.25882e-05	0.000430921	Esam	protein_coding
ENSMUSG00000015932	7335.78	6727.36	7944.2	-0.238767	0.0578565	-4.09176	4.2811e-05	0.000432944	Dstn	protein_coding
ENSMUSG00000069094	2032.16	1843.75	2220.56	-0.250093	0.0593735	-4.09097	4.29571e-05	0.000434188	Pde7a	protein_coding
ENSMUSG00000026201	2152.98	2374.1	1931.87	0.279808	0.0664529	4.08982	4.317e-05	0.000436107	Stk16	protein_coding
ENSMUSG00000038437	5265.93	5727.64	4804.22	0.252636	0.0612955	4.08933	4.32627e-05	0.000436344	Mllt6	protein_coding
ENSMUSG00000030102	7282.09	8246.98	6317.2	0.372978	0.0915207	4.08793	4.35247e-05	0.000438752	Itpr1	protein_coding
ENSMUSG00000032802	2221.32	2442.49	2000.14	0.279047	0.0672867	4.08317	4.44248e-05	0.00044711	Srxn1	protein_coding
ENSMUSG00000028041	3316.08	2982.71	3649.46	-0.278328	0.0667451	-4.08301	4.44555e-05	0.000447181	Adam15	protein_coding
ENSMUSG00000035621	2429.13	2113.1	2745.16	-0.347115	0.0814514	-4.08174	4.46999e-05	0.0004494	Midn	protein_coding
ENSMUSG00000068566	3401.69	2887.82	3915.56	-0.385439	0.0872487	-4.07625	4.57671e-05	0.000459397	Myadm	protein_coding
ENSMUSG00000041528	2257.48	2448.57	2066.39	0.247449	0.060474	4.07452	4.6109e-05	0.000462582	Rnf123	protein_coding
ENSMUSG00000028295	833.598	959.212	707.984	0.403115	0.0952732	4.06937	4.71394e-05	0.000471919	Smim8	protein_coding
ENSMUSG00000038542	1468.33	1604.75	1331.9	0.25287	0.0603805	4.06824	4.73696e-05	0.000473972	Pcid2	protein_coding
ENSMUSG00000059323	309.798	258.499	361.097	-0.441891	0.107189	-4.06537	4.79554e-05	0.000479326	Vps28	protein_coding
ENSMUSG00000034121	288.102	339.47	236.734	0.468366	0.109525	4.06301	4.84442e-05	0.000482934	Mks1	protein_coding
ENSMUSG00000042569	790.418	891.363	689.473	0.346306	0.0823486	4.0628	4.84884e-05	0.00048312	Dhrs7b	protein_coding
ENSMUSG00000020311	2248.47	2462.26	2034.69	0.264752	0.0638852	4.06192	4.86717e-05	0.000484692	Erlec1	protein_coding
ENSMUSG00000042567	391.135	451.606	330.664	0.423948	0.105022	4.0596	4.91578e-05	0.000489016	Nek10	protein_coding
ENSMUSG00000037824	1877.94	1699.71	2056.17	-0.258685	0.0621308	-4.05536	5.00575e-05	0.000497182	Tspan14	protein_coding
ENSMUSG00000004151	2764.84	2463.17	3066.51	-0.295348	0.0703667	-4.05451	5.02399e-05	0.000498731	Etv1	protein_coding
ENSMUSG00000043542	3579.34	3225.24	3933.44	-0.282952	0.0692574	-4.052	5.07815e-05	0.000503315	Zc2hc1a	protein_coding
ENSMUSG00000023764	639.353	738.781	539.926	0.418181	0.0992905	4.0517	5.08479e-05	0.000503708	Sfi1	protein_coding
ENSMUSG00000045328	305.909	254.051	357.767	-0.447346	0.10742	-4.05146	5.0899e-05	0.000503951	Cenpe	protein_coding
ENSMUSG00000000876	956.593	1065.72	847.466	0.312006	0.0747287	4.05063	5.10793e-05	0.000505206	Pxmp4	protein_coding
ENSMUSG00000027420	129.992	91.1929	168.791	-0.685687	0.160825	-4.0476	5.17444e-05	0.000511517	Bfsp1	protein_coding
ENSMUSG00000020527	730.089	636.236	823.942	-0.340258	0.0798388	-4.04748	5.17722e-05	0.000511525	Myo19	protein_coding
ENSMUSG00000028256	801.764	889.46	714.068	0.307456	0.074729	4.0468	5.19216e-05	0.000512465	Odf2l	protein_coding
ENSMUSG00000014767	1579.18	1726.83	1431.53	0.257992	0.062315	4.04239	5.2909e-05	0.000521666	Tbp	protein_coding
ENSMUSG00000027752	770.22	683.967	856.474	-0.315973	0.0776376	-4.04082	5.32638e-05	0.000524616	Exosc8	protein_coding
ENSMUSG00000016481	849.894	765.674	934.113	-0.286533	0.0706449	-4.04063	5.33077e-05	0.000524776	Cr1l	protein_coding
ENSMUSG00000070699	616.397	724.723	508.071	0.45916	0.107832	4.03391	5.48559e-05	0.000538894	Sars2	protein_coding
ENSMUSG00000022841	2595.24	2361.41	2829.07	-0.250387	0.0608687	-4.03269	5.51411e-05	0.000541286	Ap2m1	protein_coding
ENSMUSG00000028914	1225.61	1100.12	1351.09	-0.283404	0.0688109	-4.03159	5.54009e-05	0.000543401	Casp9	protein_coding
ENSMUSG00000020235	2425.48	2153.8	2697.17	-0.313113	0.0765474	-4.03074	5.56014e-05	0.000545084	Fzr1	protein_coding
ENSMUSG00000037169	879.384	763.147	995.621	-0.363938	0.0890499	-4.0242	5.71694e-05	0.000559295	Mycn	protein_coding
ENSMUSG00000057375	1071.23	1180.03	962.429	0.284399	0.0695026	4.02403	5.72098e-05	0.000559401	Yipf1	protein_coding
ENSMUSG00000052581	1946.78	1776.24	2117.32	-0.250299	0.0615927	-4.02259	5.75613e-05	0.000562547	Lrrtm4	protein_coding
ENSMUSG00000045087	150.747	114.611	186.882	-0.594764	0.140611	-4.02045	5.80864e-05	0.000567092	S1pr5	protein_coding
ENSMUSG00000001288	313.954	259.415	368.493	-0.456397	0.110224	-4.01772	5.87642e-05	0.00057331	Rarg	protein_coding
ENSMUSG00000027896	195.211	158.972	231.451	-0.485427	0.117069	-4.0148	5.94967e-05	0.000579215	Slc16a4	protein_coding
ENSMUSG00000029538	1754.73	1902.84	1606.62	0.251164	0.0628816	4.0138	5.97484e-05	0.000581203	Srsf9	protein_coding
ENSMUSG00000072966	4309.69	3799.58	4819.8	-0.324283	0.078726	-4.01369	5.97777e-05	0.000581203	Gprasp2	protein_coding
ENSMUSG00000003208	345.509	398.149	292.869	0.413595	0.100103	4.01354	5.9814e-05	0.000581257	Ccdc94	protein_coding
ENSMUSG00000022812	10563.3	9648.65	11477.9	-0.245062	0.0602555	-4.01267	6.00346e-05	0.000583101	Gsk3b	protein_coding
ENSMUSG00000028630	4590.49	4182.51	4998.47	-0.259771	0.064666	-4.01126	6.03948e-05	0.000586298	Dyrk2	protein_coding
ENSMUSG00000021820	10051.2	10910.5	9191.94	0.236615	0.0579154	4.00682	6.15416e-05	0.000597124	Camk2g	protein_coding
ENSMUSG00000012443	291.702	240.302	343.101	-0.467377	0.116738	-4.00641	6.16476e-05	0.000597331	Kif11	protein_coding
ENSMUSG00000021288	30280.3	27683.2	32877.5	-0.238705	0.0585235	-4.00646	6.16367e-05	0.000597331	Klc1	protein_coding
ENSMUSG00000028104	1034	1136.23	931.764	0.294272	0.0744338	4.00638	6.16577e-05	0.000597331	Polr3gl	protein_coding
ENSMUSG00000049866	3090.37	2778.23	3402.52	-0.281834	0.0690914	-4.00614	6.17194e-05	0.000597623	Arl4c	protein_coding
ENSMUSG00000034021	5683.86	5252.87	6114.84	-0.216746	0.0535514	-4.00563	6.18516e-05	0.00059834	Pds5b	protein_coding
ENSMUSG00000090258	232.092	280.397	183.787	0.529573	0.130227	4.00561	6.18569e-05	0.00059834	Churc1	protein_coding
ENSMUSG00000030630	745.911	651.409	840.413	-0.34238	0.0824994	-4.00145	6.29545e-05	0.00060802	Fah	protein_coding
ENSMUSG00000023048	671.091	775.565	566.618	0.427665	0.110314	4.00074	6.31453e-05	0.000609244	Prr13	protein_coding
ENSMUSG00000025417	2969.01	3320.07	2617.96	0.330661	0.081792	3.9995	6.34754e-05	0.000612117	Pip4k2c	protein_coding
ENSMUSG00000068732	2552.93	2781.75	2324.1	0.250956	0.0616835	3.99911	6.35802e-05	0.000612815	Tmem167b	protein_coding
ENSMUSG00000024942	729.881	617.929	841.834	-0.410822	0.0991787	-3.99476	6.47596e-05	0.000623864	Capn1	protein_coding
ENSMUSG00000039646	249.792	288.834	210.75	0.423827	0.105188	3.99403	6.49608e-05	0.000625483	Vasn	protein_coding
ENSMUSG00000017686	4384.76	4744.56	4024.96	0.226793	0.0556925	3.99354	6.5094e-05	0.000625975	Rhot1	protein_coding
ENSMUSG00000038354	479.772	547.658	411.887	0.392454	0.0966734	3.99348	6.51112e-05	0.000625975	Ankrd35	protein_coding
ENSMUSG00000032244	8667.49	8080.55	9254.42	-0.19403	0.0481717	-3.99195	6.55311e-05	0.000628732	Fem1b	protein_coding
ENSMUSG00000025393	35065.6	31801	38330.2	-0.26281	0.0649283	-3.99176	6.55845e-05	0.000628926	Atp5b	protein_coding
ENSMUSG00000015488	2214.14	2407.78	2020.5	0.239645	0.0585174	3.99039	6.59656e-05	0.000632259	Cacfd1	protein_coding
ENSMUSG00000027349	1994.59	2157.41	1831.78	0.237605	0.0592213	3.98958	6.61904e-05	0.000634092	Fam98b	protein_coding
ENSMUSG00000026344	5944.44	5288.21	6600.67	-0.321375	0.0814285	-3.9892	6.62978e-05	0.0006348	Lypd1	protein_coding
ENSMUSG00000074064	841.537	941.567	741.507	0.317462	0.0763042	3.98873	6.64286e-05	0.00063573	Mlycd	protein_coding
ENSMUSG00000020900	11118.6	9791.82	12445.5	-0.31531	0.0754595	-3.98825	6.65625e-05	0.000636689	Myh10	protein_coding
ENSMUSG00000046204	2969.1	2616.62	3321.57	-0.334721	0.0833953	-3.98776	6.66996e-05	0.000637678	Pnma2	protein_coding
ENSMUSG00000045903	760.366	875.949	644.782	0.415333	0.10376	3.98606	6.71806e-05	0.000641952	Npas4	protein_coding
ENSMUSG00000005262	2980.15	3203.76	2756.53	0.220696	0.0552555	3.98435	6.76639e-05	0.000646243	Ufd1	protein_coding
ENSMUSG00000037287	3196.23	3449.26	2943.21	0.221241	0.0546481	3.98351	6.79047e-05	0.000648216	Tbcel	protein_coding
ENSMUSG00000035086	5454.11	5902.82	5005.39	0.232356	0.0575763	3.98131	6.85354e-05	0.000653576	Becn1	protein_coding
ENSMUSG00000020936	5978.28	6446.45	5510.11	0.223538	0.0556248	3.97876	6.9275e-05	0.000659631	Nmt1	protein_coding
ENSMUSG00000042444	3626.46	3317.23	3935.69	-0.245078	0.0610787	-3.97576	7.01555e-05	0.000667679	Mindy2	protein_coding
ENSMUSG00000025207	3154.16	2788.71	3519.61	-0.32728	0.0818813	-3.9752	7.03202e-05	0.000668909	Sema4g	protein_coding
ENSMUSG00000020719	24264	22432.3	26095.6	-0.198226	0.0485393	-3.975	7.03799e-05	0.00066914	Ddx5	protein_coding
ENSMUSG00000032698	802.655	712.992	892.318	-0.311503	0.0770015	-3.97398	7.06809e-05	0.000671326	Lmo2	protein_coding
ENSMUSG00000009013	5029.21	4417.05	5641.38	-0.336511	0.0830106	-3.97306	7.09565e-05	0.000673268	Dynll1	protein_coding
ENSMUSG00000025026	5591.14	5172.15	6010.14	-0.209403	0.0519139	-3.97283	7.10228e-05	0.000673429	Add3	protein_coding
ENSMUSG00000035944	229.257	268.989	189.525	0.458352	0.117195	3.97213	7.12343e-05	0.000674549	Ttc38	protein_coding
ENSMUSG00000002733	1248.34	1375.2	1121.49	0.285809	0.0710312	3.97188	7.13062e-05	0.000674891	Plekha3	protein_coding
ENSMUSG00000041064	66.8019	45.1822	88.4217	-0.720037	0.16818	-3.9709	7.1603e-05	0.000677023	Pif1	protein_coding
ENSMUSG00000042688	4888.96	4550.72	5227.2	-0.214247	0.054472	-3.96862	7.22886e-05	0.000683163	Mapk6	protein_coding
ENSMUSG00000055835	955.568	1057.65	853.487	0.291634	0.0715128	3.96695	7.27982e-05	0.000687636	Zfp1	protein_coding
ENSMUSG00000063011	149.52	183.509	115.531	0.566586	0.133701	3.96663	7.28962e-05	0.000688217	Msln	protein_coding
ENSMUSG00000030704	21173.5	19229.6	23117.5	-0.260783	0.0649791	-3.96502	7.33906e-05	0.000692194	Rab6a	protein_coding
ENSMUSG00000063065	6810.85	6185.86	7435.85	-0.257521	0.0639425	-3.96468	7.34937e-05	0.000692781	Mapk3	protein_coding
ENSMUSG00000042228	336.294	284.947	387.642	-0.408205	0.0995146	-3.96277	7.40851e-05	0.000697352	Lyn	protein_coding
ENSMUSG00000071073	1551.12	1370.51	1731.72	-0.324186	0.0805835	-3.96144	7.44982e-05	0.000700891	Lrrc73	protein_coding
ENSMUSG00000020248	2399.72	2645.46	2153.99	0.279955	0.068747	3.95994	7.49689e-05	0.000704268	Nfyb	protein_coding
ENSMUSG00000029430	2314.67	2114.76	2514.58	-0.253747	0.0640037	-3.96	7.49509e-05	0.000704268	Ran	protein_coding
ENSMUSG00000056167	3361.43	3622.56	3100.3	0.226302	0.0568416	3.95967	7.50519e-05	0.000704698	Cnot10	protein_coding
ENSMUSG00000042046	2294.38	2500.36	2088.4	0.25455	0.0634047	3.95893	7.52872e-05	0.000706555	Dstyk	protein_coding
ENSMUSG00000040855	5350.16	4837.52	5862.8	-0.263271	0.0648877	-3.95752	7.5733e-05	0.000709331	Reps2	protein_coding
ENSMUSG00000021559	4769.22	4372.33	5166.11	-0.23125	0.0573608	-3.95739	7.57729e-05	0.000709353	Dapk1	protein_coding
ENSMUSG00000035439	283.548	233.031	334.065	-0.467305	0.118592	-3.9558	7.62798e-05	0.000713745	Haus8	protein_coding
ENSMUSG00000068922	925.465	836.491	1014.44	-0.280429	0.0712111	-3.95373	7.69411e-05	0.000719576	Msto1	protein_coding
ENSMUSG00000014592	9347.63	8340.63	10354.6	-0.295857	0.0729639	-3.95291	7.72053e-05	0.00072169	Camta1	protein_coding
ENSMUSG00000014980	433.593	491.401	375.785	0.367462	0.0912291	3.9517	7.75976e-05	0.000723568	Tsen15	protein_coding
ENSMUSG00000041859	242.726	203.455	281.997	-0.442671	0.122957	-3.95181	7.75618e-05	0.000723568	Mcm3	protein_coding
ENSMUSG00000021039	2574.26	2804.47	2344.05	0.248097	0.0615859	3.95007	7.81272e-05	0.000728147	Snw1	protein_coding
ENSMUSG00000015094	7199.99	6571.73	7828.25	-0.247879	0.0620265	-3.94972	7.82411e-05	0.000728849	Npdc1	protein_coding
ENSMUSG00000029106	13867.4	12657.7	15077.1	-0.236316	0.0583193	-3.94674	7.92211e-05	0.000737252	Add1	protein_coding
ENSMUSG00000006641	606.793	533.874	679.712	-0.324366	0.0792688	-3.94413	8.00885e-05	0.000744591	Slc5a6	protein_coding
ENSMUSG00000025371	1172.68	1303.08	1042.29	0.310363	0.0773306	3.94258	8.06111e-05	0.000749081	Chmp6	protein_coding
ENSMUSG00000064090	139.499	175.233	103.766	0.618754	0.144494	3.94057	8.12893e-05	0.000755012	Vrk2	protein_coding
ENSMUSG00000031654	1179.48	1032.45	1326.51	-0.329114	0.0795923	-3.93931	8.17159e-05	0.000757857	Cbln1	protein_coding
ENSMUSG00000058587	1841.09	1662.83	2019.35	-0.272185	0.0680654	-3.93795	8.21805e-05	0.000761418	Tmod3	protein_coding
ENSMUSG00000030677	157.75	121.244	194.256	-0.572713	0.139809	-3.9377	8.22653e-05	0.000761831	Kif22	protein_coding
ENSMUSG00000020898	1639.65	1455.56	1823.74	-0.308585	0.0765529	-3.93562	8.29819e-05	0.00076809	Ctc1	protein_coding
ENSMUSG00000073436	744.785	856.773	632.796	0.401532	0.0986255	3.93416	8.34897e-05	0.000772413	Eme2	protein_coding
ENSMUSG00000023832	1539.55	1390.86	1688.25	-0.268064	0.0668199	-3.93307	8.38692e-05	0.000775544	Acat2	protein_coding
ENSMUSG00000078789	347.142	400.206	294.079	0.411266	0.102479	3.92931	8.51913e-05	0.000787384	Dph1	protein_coding
ENSMUSG00000040624	1193.37	1056.83	1329.92	-0.313981	0.0776485	-3.92844	8.54994e-05	0.000789845	Plekhg1	protein_coding
ENSMUSG00000001707	1206.69	1090.29	1323.09	-0.282904	0.0724273	-3.92711	8.59744e-05	0.000793845	Eef1e1	protein_coding
ENSMUSG00000024824	270.391	222.99	317.793	-0.457422	0.111357	-3.92529	8.6624e-05	0.000799453	Rad9a	protein_coding
ENSMUSG00000026121	748.707	655.62	841.793	-0.343662	0.0865749	-3.92332	8.73369e-05	0.000805639	Sema4c	protein_coding
ENSMUSG00000028007	1382.97	1252.71	1513.24	-0.275871	0.0705613	-3.92227	8.77191e-05	0.00080877	Snx7	protein_coding
ENSMUSG00000034361	1225.76	1017.29	1434.24	-0.445561	0.109202	-3.92208	8.77879e-05	0.000809009	Cpne2	protein_coding
ENSMUSG00000051853	37070.1	40618.9	33521.3	0.27865	0.0711498	3.92026	8.84523e-05	0.000814665	Arf3	protein_coding
ENSMUSG00000056770	3660.5	3369.37	3951.62	-0.227565	0.0574272	-3.92017	8.84878e-05	0.000814665	Setd3	protein_coding
ENSMUSG00000027259	1123.91	1245.56	1002.25	0.294012	0.0727024	3.91836	8.91551e-05	0.00082001	Adal	protein_coding
ENSMUSG00000028708	1542.26	1689.95	1394.57	0.270422	0.0681429	3.91732	8.95399e-05	0.000823148	Mknk1	protein_coding
ENSMUSG00000030849	1380.85	1228.8	1532.89	-0.295364	0.0725487	-3.91443	9.06198e-05	0.000831862	Fgfr2	protein_coding
ENSMUSG00000035407	133.876	100.615	167.138	-0.602124	0.138804	-3.91404	9.07639e-05	0.000832377	Kank4	protein_coding
ENSMUSG00000035529	1749.32	1600.67	1897.97	-0.239075	0.0601204	-3.91387	9.08287e-05	0.000832567	Prdm4	protein_coding
ENSMUSG00000038628	2095.47	1897.19	2293.76	-0.270545	0.06861	-3.91266	9.12853e-05	0.000836346	Polr3k	protein_coding
ENSMUSG00000055884	924.837	1028.8	820.873	0.31149	0.0776727	3.91217	9.14714e-05	0.000837646	Fancm	protein_coding
ENSMUSG00000028556	2692.72	2451.19	2934.24	-0.250151	0.0627887	-3.91156	9.17003e-05	0.000839335	Dock7	protein_coding
ENSMUSG00000027966	1417.04	997.824	1836.26	-0.670504	0.163101	-3.91084	9.1977e-05	0.00084146	Col11a1	protein_coding
ENSMUSG00000033857	392.411	447.894	336.929	0.388937	0.0990596	3.90683	9.35141e-05	0.000854696	Engase	protein_coding
ENSMUSG00000049422	1972.82	1673.85	2271.79	-0.412825	0.105083	-3.90624	9.37435e-05	0.000856378	Chchd10	protein_coding
ENSMUSG00000033276	313.812	263.997	363.627	-0.424793	0.106341	-3.90318	9.4936e-05	0.000865598	Stk36	protein_coding
ENSMUSG00000002319	1439.43	1282.25	1596.61	-0.292882	0.0722196	-3.90247	9.52166e-05	0.000867738	Ipo4	protein_coding
ENSMUSG00000033427	40.8466	56.211	25.4823	0.739255	0.183548	3.90123	9.57043e-05	0.000871762	Upb1	protein_coding
ENSMUSG00000004771	6690.28	6182.37	7198.19	-0.224717	0.0575923	-3.90018	9.61194e-05	0.0008747	Rab11a	protein_coding
ENSMUSG00000018677	1958.44	1800.04	2116.85	-0.234899	0.0598705	-3.89904	9.65737e-05	0.000877989	Slc25a39	protein_coding
ENSMUSG00000037907	6184.4	5683.75	6685.05	-0.230129	0.0583601	-3.89888	9.66404e-05	0.000878173	Ankrd13b	protein_coding
ENSMUSG00000023191	1300.22	1158.42	1442.02	-0.310025	0.0794351	-3.89731	9.72662e-05	0.000883011	P3h3	protein_coding
ENSMUSG00000022488	700.608	624.973	776.243	-0.303002	0.0766031	-3.89606	9.77701e-05	0.000887159	Nckap1l	protein_coding
ENSMUSG00000044252	15169.3	13690.3	16648.3	-0.279798	0.0714356	-3.89531	9.80744e-05	0.000889494	Osbpl1a	protein_coding
ENSMUSG00000017764	825.177	920.477	729.876	0.324886	0.0828546	3.89493	9.82279e-05	0.000890458	Zswim1	protein_coding
ENSMUSG00000039960	2222.76	1999.52	2446.01	-0.285756	0.0728496	-3.89301	9.90073e-05	0.000897093	Rhou	protein_coding
ENSMUSG00000028465	2037.33	1843.8	2230.86	-0.256295	0.0637953	-3.89149	9.96301e-05	0.000902304	Tln1	protein_coding
ENSMUSG00000037111	5235.31	4761.99	5708.63	-0.246426	0.0616357	-3.89055	0.000100016	0.000905369	Setd7	protein_coding
ENSMUSG00000038072	2692.54	2938.09	2446.98	0.241775	0.0599736	3.88952	0.000100441	0.000908778	Galnt11	protein_coding
ENSMUSG00000031565	2913.96	3240.8	2587.12	0.326905	0.0857649	3.88719	0.000101413	0.000917132	Fgfr1	protein_coding
ENSMUSG00000034574	6277.29	5767.3	6787.28	-0.234484	0.0599286	-3.88566	0.000102051	0.000922463	Daam1	protein_coding
ENSMUSG00000020832	647.008	718.973	575.043	0.308346	0.0775454	3.88549	0.000102122	0.000922664	Eral1	protein_coding
ENSMUSG00000014633	332.777	383.596	281.958	0.40438	0.0985142	3.88534	0.000102185	0.000922755	Cmc2	protein_coding
ENSMUSG00000035142	218.354	258.605	178.104	0.473665	0.113673	3.88405	0.000102729	0.000925489	Nubpl	protein_coding
ENSMUSG00000024798	601.659	515.701	687.618	-0.386014	0.0975762	-3.8824	0.000103431	0.000931373	Htr7	protein_coding
ENSMUSG00000020930	107.9	132.916	82.8845	0.566752	0.142994	3.88212	0.000103552	0.000931571	Ccdc103	protein_coding
ENSMUSG00000039686	6452.22	6984.09	5920.36	0.251589	0.0658155	3.8819	0.000103645	0.000931968	Zer1	protein_coding
ENSMUSG00000007944	3747.42	3243.15	4251.68	-0.370855	0.0944117	-3.8801	0.000104414	0.000937992	Ttc9b	protein_coding
ENSMUSG00000030029	1637.91	1472.82	1803	-0.282184	0.0715732	-3.87905	0.000104863	0.000941576	Lrig1	protein_coding
ENSMUSG00000028224	931.084	1031.43	830.734	0.295151	0.0739779	3.8783	0.000105189	0.000944052	Nbn	protein_coding
ENSMUSG00000049670	3099.57	3336.75	2862.39	0.216967	0.0552193	3.87712	0.000105701	0.000946853	Morn4	protein_coding
ENSMUSG00000027422	3087.3	2708.76	3465.84	-0.318811	0.077718	-3.87617	0.000106115	0.00095011	Rrbp1	protein_coding
ENSMUSG00000058355	5894.29	5403.35	6385.22	-0.234404	0.0595491	-3.8759	0.000106229	0.000950683	Abce1	protein_coding
ENSMUSG00000029408	1799.7	1610.98	1988.43	-0.288965	0.072672	-3.87409	0.000107023	0.000956422	Abcb9	protein_coding
ENSMUSG00000040407	6112.94	5372.14	6853.74	-0.33356	0.0841976	-3.87412	0.00010701	0.000956422	Akap9	protein_coding
ENSMUSG00000073982	318.322	267.09	369.554	-0.430131	0.10729	-3.87397	0.000107079	0.000956471	Rhog	protein_coding
ENSMUSG00000021127	1077.08	947.483	1206.68	-0.331706	0.0841802	-3.87384	0.000107132	0.000956497	Zfp36l1	protein_coding
ENSMUSG00000027111	1180.21	1071.89	1288.52	-0.256388	0.0648184	-3.87342	0.00010732	0.000957726	Itga6	protein_coding
ENSMUSG00000033216	703.252	780.603	625.9	0.312593	0.0802757	3.8704	0.000108658	0.000969208	Eefsec	protein_coding
ENSMUSG00000042709	938.258	1030.23	846.284	0.281163	0.0724006	3.86809	0.000109692	0.000977502	Atpaf2	protein_coding
ENSMUSG00000031548	855.771	977.052	734.49	0.383107	0.0954929	3.86709	0.000110141	0.000980586	Sfrp1	protein_coding
ENSMUSG00000027430	1414.66	1560.97	1268.35	0.285279	0.0722144	3.86414	0.000111479	0.000991562	Dtd1	protein_coding
ENSMUSG00000030590	796.954	657.404	936.504	-0.457901	0.113715	-3.86394	0.00011157	0.00099182	Fam98c	protein_coding
ENSMUSG00000035151	1107.86	1214.61	1001.1	0.26652	0.0671824	3.86385	0.000111613	0.00099182	Elmod2	protein_coding
ENSMUSG00000053310	50018.7	44002.1	56035.3	-0.328829	0.0829082	-3.86326	0.000111885	0.000993765	Nrgn	protein_coding
ENSMUSG00000038932	134.386	99.3352	169.437	-0.618306	0.154482	-3.86264	0.000112166	0.0009958	Tcfl5	protein_coding
ENSMUSG00000016487	2819.53	2576.29	3062.76	-0.244348	0.0625207	-3.86115	0.000112854	0.00100112	Ppfibp1	protein_coding
ENSMUSG00000073856	234.224	271.205	197.244	0.426795	0.112667	3.86111	0.000112872	0.00100112	Iqck	protein_coding
ENSMUSG00000034101	586.265	513.104	659.427	-0.339723	0.0857553	-3.86014	0.000113322	0.00100464	Ctnnd1	protein_coding
ENSMUSG00000015880	98.8146	73.927	123.702	-0.601746	0.148505	-3.85914	0.000113789	0.00100831	Ncapg	protein_coding
ENSMUSG00000057522	7546.22	8093.23	6999.21	0.205506	0.0526085	3.85895	0.000113877	0.00100862	Spop	protein_coding
ENSMUSG00000045294	2054.41	1856.41	2252.41	-0.274304	0.0702553	-3.85825	0.000114203	0.00101103	Insig1	protein_coding
ENSMUSG00000041658	3253.88	3014.12	3493.65	-0.206517	0.0527435	-3.8569	0.000114833	0.00101518	Rragb	protein_coding
ENSMUSG00000027678	1759.67	1588.64	1930.7	-0.269962	0.0685779	-3.85591	0.000115302	0.00101838	Ncoa3	protein_coding
ENSMUSG00000048878	2064.31	2236.08	1892.53	0.251622	0.0659691	3.85493	0.000115761	0.00102195	Hexim1	protein_coding
ENSMUSG00000016477	1232.54	1109.29	1355.79	-0.281448	0.0719253	-3.8521	0.000117109	0.00103337	E2f3	protein_coding
ENSMUSG00000001630	661.976	739.014	584.939	0.324676	0.0832825	3.8501	0.000118068	0.00104038	Stk38l	protein_coding
ENSMUSG00000039208	140.341	112.15	168.533	-0.509601	0.13031	-3.85016	0.000118039	0.00104038	Metrnl	protein_coding
ENSMUSG00000032826	36563.3	32899.3	40227.3	-0.27242	0.0687401	-3.84766	0.000119252	0.00104983	Ank2	protein_coding
ENSMUSG00000022034	74.5706	52.7458	96.3955	-0.652442	0.167484	-3.8465	0.000119816	0.00105381	Esco2	protein_coding
ENSMUSG00000037526	827.899	909.921	745.877	0.280005	0.0716527	3.84593	0.000120097	0.00105579	Atg14	protein_coding
ENSMUSG00000008398	495.751	433.478	558.024	-0.337259	0.0835985	-3.84581	0.000120157	0.00105583	Elk3	protein_coding
ENSMUSG00000028232	2948.14	3262.05	2634.23	0.28499	0.0713139	3.84456	0.000120768	0.00106071	Tmem68	protein_coding
ENSMUSG00000038525	1000.25	895.569	1104.93	-0.284598	0.071829	-3.84373	0.000121179	0.00106333	Armc10	protein_coding
ENSMUSG00000062963	2456.69	2766.14	2147.24	0.33773	0.0843523	3.84373	0.000121179	0.00106333	Ufc1	protein_coding
ENSMUSG00000052142	98.3089	73.852	122.766	-0.595162	0.147881	-3.84351	0.000121286	0.00106377	Rasal3	protein_coding
ENSMUSG00000021902	203.863	239.556	168.17	0.461145	0.117168	3.84294	0.000121569	0.00106527	Phf7	protein_coding
ENSMUSG00000073096	695.78	772.375	619.184	0.309697	0.0796759	3.84302	0.00012153	0.00106527	Lrrc61	protein_coding
ENSMUSG00000013539	2130.67	1935.67	2325.67	-0.259212	0.066508	-3.84241	0.00012183	0.00106706	Tango2	protein_coding
ENSMUSG00000033590	125.07	160.704	89.4351	0.656084	0.157571	3.84173	0.000122172	0.00106956	Myo5c	protein_coding
ENSMUSG00000028641	427.704	370.823	484.585	-0.366413	0.0952472	-3.84098	0.000122545	0.00107232	P3h1	protein_coding
ENSMUSG00000041915	2383.49	2201.97	2565.01	-0.216315	0.0556162	-3.83962	0.000123226	0.00107779	Ammecr1l	protein_coding
ENSMUSG00000015747	1670.56	1831.88	1509.25	0.268895	0.0686905	3.83784	0.00012412	0.0010846	Vps45	protein_coding
ENSMUSG00000032549	41643.2	38381.3	44905	-0.222543	0.0573149	-3.83754	0.000124273	0.00108494	Rab6b	protein_coding
ENSMUSG00000028114	1235.09	1360.4	1109.78	0.273037	0.0685863	3.83674	0.000124676	0.00108795	Mettl14	protein_coding
ENSMUSG00000063179	873.247	978.72	767.775	0.328004	0.0827827	3.83611	0.000124998	0.00109025	Pstk	protein_coding
ENSMUSG00000055371	1850.34	2007.3	1693.39	0.238662	0.0612114	3.83497	0.00012558	0.00109483	Stam2	protein_coding
ENSMUSG00000045991	271.698	320.625	222.772	0.466295	0.120769	3.83424	0.000125954	0.00109657	Onecut2	protein_coding
ENSMUSG00000021242	2163.57	1946.48	2380.66	-0.287002	0.0745164	-3.83354	0.000126313	0.00109919	Npc2	protein_coding
ENSMUSG00000025060	4259.54	4683.15	3835.93	0.276178	0.0706357	3.83193	0.000127141	0.00110538	Slk	protein_coding
ENSMUSG00000037211	401.544	346.369	456.719	-0.369587	0.0938092	-3.83155	0.000127341	0.00110661	Spry1	protein_coding
ENSMUSG00000031703	13469.6	14483	12456.3	0.201271	0.0512426	3.82972	0.000128287	0.00111432	Itfg1	protein_coding
ENSMUSG00000024982	1214.08	1336.72	1091.45	0.274639	0.0695117	3.82895	0.000128693	0.00111733	Zdhhc6	protein_coding
ENSMUSG00000022500	345.173	286.335	404.012	-0.434675	0.103613	-3.82879	0.000128777	0.0011174	Litaf	protein_coding
ENSMUSG00000034987	433.179	365.26	501.098	-0.411037	0.100164	-3.82871	0.000128819	0.0011174	Hrh2	protein_coding
ENSMUSG00000070476	2605.27	2834.52	2376.02	0.242632	0.0619902	3.82834	0.000129012	0.00111856	Fam217b	protein_coding
ENSMUSG00000029581	10140.3	8998.83	11281.7	-0.301057	0.0755967	-3.82792	0.00012923	0.00111891	Fscn1	protein_coding
ENSMUSG00000039768	3420.86	3695.13	3146.58	0.220569	0.0564462	3.82632	0.000130075	0.00112417	Dnajc11	protein_coding
ENSMUSG00000034520	666.039	591.533	740.545	-0.313842	0.0815327	-3.82605	0.000130216	0.00112487	Gjc1	protein_coding
ENSMUSG00000046329	20268.8	21506.1	19031.4	0.176622	0.0458771	3.82482	0.000130865	0.00112996	Slc25a23	protein_coding
ENSMUSG00000047583	520.739	586.405	455.072	0.341557	0.0858582	3.82442	0.000131082	0.00113131	Tyw3	protein_coding
ENSMUSG00000024238	3196.95	2895.12	3498.78	-0.263011	0.0674421	-3.82392	0.000131347	0.00113256	Zeb1	protein_coding
ENSMUSG00000054836	505.878	568.961	442.795	0.349197	0.0906216	3.824	0.000131305	0.00113256	Elp6	protein_coding
ENSMUSG00000026409	1657.3	1787.98	1526.62	0.23653	0.0621481	3.82342	0.000131614	0.00113435	Pfkfb2	protein_coding
ENSMUSG00000089762	281.212	221.527	340.898	-0.523818	0.120926	-3.82293	0.000131873	0.00113607	Ier5l	protein_coding
ENSMUSG00000021192	1347.47	1471.62	1223.32	0.254157	0.0650323	3.82134	0.000132731	0.00114293	Golga5	protein_coding
ENSMUSG00000032120	5708.41	6227.99	5188.83	0.263056	0.0686625	3.81987	0.000133522	0.00114922	C2cd2l	protein_coding
ENSMUSG00000029475	1110.35	983.546	1237.16	-0.32131	0.083835	-3.81899	0.000134001	0.00115282	Kdm2b	protein_coding
ENSMUSG00000027534	2309.55	2112.87	2506.23	-0.251394	0.0660195	-3.81806	0.000134503	0.00115661	Snx16	protein_coding
ENSMUSG00000078771	228.177	183.904	272.45	-0.500831	0.127931	-3.81787	0.000134606	0.00115698	Evi2a	protein_coding
ENSMUSG00000031534	622.341	692.246	552.435	0.319248	0.0838558	3.81592	0.000135677	0.00116512	Smim19	protein_coding
ENSMUSG00000030754	3426.04	3683.63	3168.44	0.202351	0.0517304	3.81488	0.000136248	0.00116949	Copb1	protein_coding
ENSMUSG00000046722	2866.97	2664.12	3069.83	-0.20626	0.0538102	-3.81337	0.000137083	0.0011756	Cdc42se1	protein_coding
ENSMUSG00000023094	566.428	647.014	485.843	0.373558	0.0926054	3.81256	0.000137535	0.0011784	Msrb2	protein_coding
ENSMUSG00000032411	1317.59	1440.12	1195.06	0.264778	0.0689484	3.81102	0.000138393	0.00118522	Tfdp2	protein_coding
ENSMUSG00000031782	1930.2	2104.21	1756.18	0.243438	0.0619074	3.81077	0.000138534	0.00118589	Coq9	protein_coding
ENSMUSG00000048865	172.824	141.949	203.698	-0.46634	0.125296	-3.80865	0.000139725	0.00119446	Arhgap30	protein_coding
ENSMUSG00000029178	1424.94	1283.71	1566.18	-0.269552	0.0687101	-3.80781	0.000140203	0.001198	Klf3	protein_coding
ENSMUSG00000019861	3813.89	3528.54	4099.25	-0.212593	0.0551801	-3.80532	0.000141621	0.00120902	Gopc	protein_coding
ENSMUSG00000020089	3098.25	2841.28	3355.22	-0.241089	0.0630677	-3.80481	0.000141915	0.00121099	Ppa1	protein_coding
ENSMUSG00000046603	777.938	867.777	688.1	0.314348	0.0803392	3.80347	0.000142681	0.00121697	Tcaim	protein_coding
ENSMUSG00000039396	80.6877	60.3288	101.047	-0.597236	0.154201	-3.80226	0.000143383	0.00122075	Neil3	protein_coding
ENSMUSG00000020523	1834.14	2030.24	1638.04	0.290957	0.0739478	3.80071	0.000144281	0.0012273	Fam114a2	protein_coding
ENSMUSG00000037852	75298.3	81493.7	69102.9	0.238471	0.0624571	3.80076	0.000144251	0.0012273	Cpe	protein_coding
ENSMUSG00000061666	2565.03	2371.31	2758.75	-0.211388	0.0547572	-3.79723	0.00014632	0.00124353	Gdpd1	protein_coding
ENSMUSG00000027641	201.76	165.892	237.628	-0.462469	0.121783	-3.79699	0.000146461	0.00124416	Rbl1	protein_coding
ENSMUSG00000050730	673.255	594.446	752.064	-0.319063	0.0815829	-3.79648	0.000146766	0.00124619	Arhgap42	protein_coding
ENSMUSG00000069678	246.606	283.847	209.364	0.408954	0.108413	3.79528	0.000147478	0.00125112	Pcgf1	protein_coding
ENSMUSG00000027207	832.797	925.715	739.878	0.298965	0.0756481	3.79286	0.000148922	0.0012628	Galk2	protein_coding
ENSMUSG00000029319	1866.32	2059.77	1672.86	0.283078	0.0726146	3.79248	0.00014915	0.00126417	Coq2	protein_coding
ENSMUSG00000044562	374.126	315.793	432.459	-0.405867	0.101153	-3.79188	0.000149513	0.00126667	Rasip1	protein_coding
ENSMUSG00000020024	2187.83	2006.62	2369.05	-0.234198	0.0608795	-3.78973	0.000150812	0.00127653	Cep83	protein_coding
ENSMUSG00000069769	3927.69	4282.62	3572.77	0.250752	0.0648193	3.78887	0.000151331	0.00127978	Msi2	protein_coding
ENSMUSG00000034951	1727.59	1920.68	1534.5	0.311017	0.0807577	3.78757	0.000152126	0.00128593	Cog7	protein_coding
ENSMUSG00000042408	1836.43	1987.01	1685.85	0.233112	0.0606907	3.78716	0.000152381	0.00128751	Zmym6	protein_coding
ENSMUSG00000029328	9687.75	8985.9	10389.6	-0.203387	0.052949	-3.78695	0.000152508	0.001288	Hnrnpdl	protein_coding
ENSMUSG00000034708	1716.04	1547.08	1884.99	-0.265953	0.0679039	-3.78639	0.00015285	0.00129032	Grn	protein_coding
ENSMUSG00000009741	5988.85	6362.98	5614.72	0.187909	0.0496666	3.78542	0.000153451	0.00129481	Ubp1	protein_coding
ENSMUSG00000045636	1300.84	1165.58	1436.11	-0.287368	0.0740164	-3.78479	0.000153837	0.00129641	Mtus1	protein_coding
ENSMUSG00000049571	266.766	326.946	206.587	0.559397	0.137947	3.78478	0.000153846	0.00129641	Cfap46	protein_coding
ENSMUSG00000038733	9000.03	9661.1	8338.95	0.209097	0.0546243	3.78431	0.000154137	0.00129828	Wdr26	protein_coding
ENSMUSG00000051378	67.5626	49.6054	85.5197	-0.607041	0.161641	-3.78033	0.000156619	0.00131567	Kif18b	protein_coding
ENSMUSG00000062861	414.419	355.843	472.995	-0.373682	0.0941177	-3.78034	0.000156614	0.00131567	Zfp28	protein_coding
ENSMUSG00000040557	401.827	463.44	340.214	0.406179	0.105053	3.77945	0.000157178	0.00131978	Mettl27	protein_coding
ENSMUSG00000030204	1935.36	2104.98	1765.74	0.239622	0.0617865	3.77923	0.000157312	0.00132032	Ddx47	protein_coding
ENSMUSG00000032479	21665	19827.9	23502	-0.237958	0.0619847	-3.77864	0.000157689	0.00132289	Map4	protein_coding
ENSMUSG00000033453	506.601	425.817	587.384	-0.414147	0.103086	-3.77814	0.000158001	0.00132492	Adamts15	protein_coding
ENSMUSG00000024781	759.527	684.72	834.334	-0.280538	0.0737164	-3.77579	0.000159504	0.00133575	Lipa	protein_coding
ENSMUSG00000022442	1717.49	1558.39	1876.6	-0.267494	0.0707117	-3.77461	0.000160256	0.00133987	Ttll1	protein_coding
ENSMUSG00000039497	375.186	325.078	425.295	-0.362884	0.0942359	-3.7746	0.000160263	0.00133987	Dse	protein_coding
ENSMUSG00000026483	304.15	260.596	347.704	-0.389987	0.101351	-3.773	0.000161299	0.0013478	Fam129a	protein_coding
ENSMUSG00000025103	4074.88	3776.42	4373.34	-0.215477	0.0569714	-3.77257	0.000161578	0.00134953	Btbd1	protein_coding
ENSMUSG00000085492	427.057	479.97	374.144	0.343588	0.0895004	3.77097	0.000162613	0.00135697	Trmt61b	processed_transcript
ENSMUSG00000048911	1548.85	1394.89	1702.8	-0.26859	0.0687293	-3.76885	0.000164002	0.00136796	Rnf24	protein_coding
ENSMUSG00000042396	1316.42	1473.16	1159.69	0.317874	0.0807279	3.76835	0.000164332	0.00137011	Rbm7	protein_coding
ENSMUSG00000059734	2370.82	2661.31	2080.33	0.32587	0.0827202	3.76813	0.000164474	0.00137069	Ndufs8	protein_coding
ENSMUSG00000025077	502.519	567.105	437.934	0.340052	0.0859753	3.7674	0.000164956	0.00137289	Dclre1a	protein_coding
ENSMUSG00000027677	10529.4	11437.1	9621.74	0.249937	0.0660921	3.76643	0.000165596	0.00137761	Ttc14	protein_coding
ENSMUSG00000030199	1532.83	1384.7	1680.96	-0.26488	0.0685759	-3.7662	0.00016575	0.00137828	Etv6	protein_coding
ENSMUSG00000037552	488.935	414.691	563.179	-0.402521	0.103619	-3.766	0.000165882	0.00137869	Plekhg2	protein_coding
ENSMUSG00000051232	1272.61	1396.99	1148.23	0.271093	0.07039	3.76591	0.000165944	0.00137869	Tmem199	protein_coding
ENSMUSG00000024949	6694.33	7225.57	6163.09	0.234496	0.0624034	3.76552	0.000166203	0.00138023	Sf1	protein_coding
ENSMUSG00000022635	2937.97	3256.08	2619.87	0.296608	0.0766994	3.76158	0.000168841	0.00140129	Zcrb1	protein_coding
ENSMUSG00000040713	1257.81	1393.77	1121.85	0.289973	0.0741002	3.76151	0.000168887	0.00140129	Creg1	protein_coding
ENSMUSG00000029577	5511.17	5914.31	5108.03	0.202222	0.0528325	3.75957	0.000170204	0.0014116	Ube3b	protein_coding
ENSMUSG00000062995	2062.11	2293.72	1830.51	0.31587	0.083495	3.75862	0.000170851	0.00141572	Ica1	protein_coding
ENSMUSG00000002870	301.151	254.288	348.014	-0.40974	0.104651	-3.75738	0.000171701	0.0014209	Mcm2	protein_coding
ENSMUSG00000068115	400.363	455.556	345.171	0.368504	0.0934107	3.75627	0.000172461	0.00142656	Ninl	protein_coding
ENSMUSG00000026627	472.18	416.574	527.786	-0.326276	0.0857131	-3.75497	0.000173362	0.00143279	Tmem206	protein_coding
ENSMUSG00000006442	1542.65	1383.33	1701.97	-0.288189	0.075261	-3.75469	0.000173558	0.00143312	Srm	protein_coding
ENSMUSG00000010067	469.58	415.94	523.221	-0.321879	0.0857305	-3.75168	0.00017565	0.00144977	Rassf1	protein_coding
ENSMUSG00000052525	54.6574	71.9657	37.3491	0.66659	0.174818	3.74921	0.000177393	0.00146288	Spdya	protein_coding
ENSMUSG00000031309	3970.59	3645.82	4295.36	-0.23167	0.0609393	-3.74668	0.00017919	0.00147705	Rps6ka3	protein_coding
ENSMUSG00000013622	1838.59	2041.78	1635.4	0.311785	0.082687	3.74507	0.000180341	0.00148589	Atraid	protein_coding
ENSMUSG00000039942	98.0128	75.3264	120.699	-0.559932	0.147224	-3.74308	0.000181777	0.00149707	Ptger4	protein_coding
ENSMUSG00000022956	4921	4484.5	5357.5	-0.259351	0.069345	-3.74296	0.000181863	0.00149712	Atp5o	protein_coding
ENSMUSG00000036333	15669	14256.9	17081.1	-0.249749	0.0653635	-3.74254	0.000182168	0.00149898	Kidins220	protein_coding
ENSMUSG00000020185	89.3328	68.2205	110.445	-0.568837	0.147808	-3.74221	0.000182409	0.00150031	E2f7	protein_coding
ENSMUSG00000047534	132.948	104.146	161.749	-0.533665	0.139155	-3.73944	0.00018443	0.00151627	Mis18bp1	protein_coding
ENSMUSG00000071104	47.9876	31.3897	64.5855	-0.718147	0.176975	-3.73706	0.000186185	0.00152871	Ccdc110	protein_coding
ENSMUSG00000021608	2552.12	2361.73	2742.5	-0.220278	0.0589608	-3.73679	0.000186384	0.00152968	Lpcat1	protein_coding
ENSMUSG00000022339	876.938	976.006	777.87	0.313556	0.0829891	3.73298	0.000189225	0.00155232	Ebag9	protein_coding
ENSMUSG00000021103	562.59	636.005	489.175	0.346454	0.0883469	3.73254	0.000189555	0.00155435	Mnat1	protein_coding
ENSMUSG00000026234	15239.9	16343.5	14136.2	0.207918	0.0552049	3.73126	0.000190526	0.00156164	Ncl	protein_coding
ENSMUSG00000022329	866.861	974.656	759.066	0.335506	0.0866434	3.73064	0.000190998	0.00156482	Stk3	protein_coding
ENSMUSG00000042350	7691.38	8282.02	7100.74	0.223023	0.0594804	3.73035	0.00019121	0.00156544	Arel1	protein_coding
ENSMUSG00000032702	1310.85	1190.51	1431.19	-0.270332	0.0728771	-3.72834	0.000192747	0.00157711	Kank1	protein_coding
ENSMUSG00000008373	1972.67	2128.9	1816.43	0.223263	0.0589468	3.72782	0.000193144	0.00157967	Prpf31	protein_coding
ENSMUSG00000033096	2159.33	2352.26	1966.39	0.24682	0.0647076	3.72503	0.000195295	0.00159588	Apmap	protein_coding
ENSMUSG00000032329	4314.84	4597.2	4032.48	0.186677	0.04962	3.7244	0.000195781	0.00159915	Hmg20a	protein_coding
ENSMUSG00000039427	828.326	919.59	737.061	0.292081	0.0749278	3.72429	0.000195865	0.00159915	Alg1	protein_coding
ENSMUSG00000030747	2785.56	3042.45	2528.68	0.260368	0.0690814	3.72322	0.000196695	0.00160455	Dgat2	protein_coding
ENSMUSG00000079037	16060.8	17233.8	14887.9	0.222233	0.0602516	3.72247	0.000197285	0.00160866	Prnp	protein_coding
ENSMUSG00000024359	8173.03	7594.98	8751.09	-0.197556	0.0522679	-3.72109	0.000198363	0.00161502	Hspa9	protein_coding
ENSMUSG00000031320	1133.04	1020.62	1245.46	-0.292706	0.08017	-3.72104	0.000198406	0.00161502	Rps4x	protein_coding
ENSMUSG00000022885	618.979	548.558	689.4	-0.303089	0.0778366	-3.72086	0.000198548	0.00161548	St6gal1	protein_coding
ENSMUSG00000025903	1168.07	1318.01	1018.12	0.34609	0.0897632	3.72055	0.000198787	0.00161638	Lypla1	protein_coding
ENSMUSG00000003429	2394.29	2158.78	2629.79	-0.286284	0.0773899	-3.72008	0.000199157	0.00161764	Rps11	protein_coding
ENSMUSG00000030340	194.581	236.061	153.102	0.527533	0.144799	3.72016	0.000199094	0.00161764	Scnn1a	protein_coding
ENSMUSG00000025218	270.105	313.003	227.208	0.420703	0.112788	3.71965	0.000199502	0.00161976	Poll	protein_coding
ENSMUSG00000063409	157.322	195.973	118.671	0.595098	0.147322	3.7191	0.000199937	0.00162259	Lrrc43	protein_coding
ENSMUSG00000074211	599.832	683.059	516.606	0.373025	0.0974326	3.71828	0.000200586	0.00162646	Sdhaf1	protein_coding
ENSMUSG00000028180	10632.8	11536.8	9728.87	0.238714	0.0631718	3.71802	0.000200788	0.0016274	Zranb2	protein_coding
ENSMUSG00000007987	1952.03	2142.58	1761.48	0.260788	0.0675769	3.71706	0.000201554	0.00163221	Ift22	protein_coding
ENSMUSG00000047547	7203.17	6577.4	7828.95	-0.239726	0.0631183	-3.71513	0.000203095	0.00164399	Cltb	protein_coding
ENSMUSG00000064254	354.613	408.616	300.61	0.392673	0.0975965	3.71482	0.000203351	0.00164535	Ethe1	protein_coding
ENSMUSG00000049092	1363.69	1222.52	1504.87	-0.282441	0.0738054	-3.7144	0.000203689	0.00164738	Gpr137c	protein_coding
ENSMUSG00000032606	3808.04	3498.09	4117.99	-0.23013	0.0610848	-3.71349	0.00020442	0.00165258	Nicn1	protein_coding
ENSMUSG00000030275	20343.6	21577.6	19109.5	0.179991	0.0483758	3.71326	0.000204603	0.00165336	Etnk1	protein_coding
ENSMUSG00000025255	516.863	592.495	441.232	0.396289	0.105358	3.70884	0.000208209	0.00168034	Zfhx4	protein_coding
ENSMUSG00000022687	1044.26	925.181	1163.34	-0.314725	0.0833831	-3.7084	0.000208575	0.00168258	Boc	protein_coding
ENSMUSG00000025059	1346.18	1207.73	1484.62	-0.287418	0.0762854	-3.706	0.000210557	0.00169711	Gk	protein_coding
ENSMUSG00000020668	11807.5	10818.5	12796.5	-0.239969	0.0642089	-3.70569	0.00021082	0.00169851	Kif3c	protein_coding
ENSMUSG00000033105	2925	2709.22	3140.78	-0.215564	0.0579654	-3.7055	0.00021097	0.001699	Lss	protein_coding
ENSMUSG00000021375	2087.71	1918.25	2257.16	-0.234311	0.0628902	-3.70464	0.000211689	0.00170406	Kif13a	protein_coding
ENSMUSG00000028706	409.725	467.934	351.516	0.381495	0.101716	3.7034	0.000212728	0.00171113	Nsun4	protein_coding
ENSMUSG00000035949	3887.95	4229.15	3546.75	0.238974	0.0627929	3.70338	0.000212748	0.00171113	Fbxw2	protein_coding
ENSMUSG00000032519	745.484	677.191	813.777	-0.275005	0.0761227	-3.70165	0.000214205	0.00172065	Slc25a38	protein_coding
ENSMUSG00000002679	623.456	697.843	549.068	0.329422	0.0870866	3.70069	0.000215017	0.00172644	Med6	protein_coding
ENSMUSG00000075273	507.431	572.139	442.724	0.346552	0.0898215	3.69867	0.000216729	0.00173871	Ttc30b	protein_coding
ENSMUSG00000020493	98.1085	72.7671	123.45	-0.602205	0.154655	-3.69782	0.000217456	0.00174306	Prr11	protein_coding
ENSMUSG00000032348	752.858	833.225	672.491	0.295731	0.0783126	3.69615	0.000218896	0.00175312	Gsta4	protein_coding
ENSMUSG00000042198	595.302	666.265	524.339	0.325335	0.085577	3.69541	0.000219536	0.00175701	Chchd7	protein_coding
ENSMUSG00000090698	297.886	247.634	348.138	-0.443514	0.121892	-3.69251	0.000222048	0.0017761	Apold1	protein_coding
ENSMUSG00000021171	2762.06	2541.21	2982.9	-0.230776	0.0621618	-3.69063	0.000223696	0.00178776	Esyt2	protein_coding
ENSMUSG00000026361	2346.87	2563.3	2130.44	0.252837	0.0667858	3.69053	0.00022379	0.00178776	Cdc73	protein_coding
ENSMUSG00000003161	2102.31	1924.77	2279.86	-0.238905	0.0639056	-3.68967	0.000224541	0.00179301	Sri	protein_coding
ENSMUSG00000024294	8919.24	9594.45	8244.03	0.211976	0.0565736	3.68864	0.00022546	0.0017984	Mib1	protein_coding
ENSMUSG00000043998	1449.1	1318.72	1579.49	-0.256799	0.0690962	-3.68859	0.000225502	0.0017984	Mgat2	protein_coding
ENSMUSG00000022186	32214.5	29969.2	34459.9	-0.201272	0.0541601	-3.68815	0.000225894	0.00180001	Oxct1	protein_coding
ENSMUSG00000047473	625.471	534.917	716.025	-0.380062	0.0976009	-3.68535	0.000228388	0.00181835	Zfp30	protein_coding
ENSMUSG00000074030	1247.69	1130.04	1365.34	-0.257003	0.0676332	-3.6852	0.000228527	0.00181869	Exoc8	protein_coding
ENSMUSG00000032766	252.857	208.335	297.379	-0.460357	0.130307	-3.68447	0.000229181	0.00182237	Gng11	protein_coding
ENSMUSG00000050912	763.089	665.284	860.894	-0.354779	0.0957687	-3.68422	0.000229401	0.00182237	Tmem123	protein_coding
ENSMUSG00000074652	335.831	402.17	269.492	0.499336	0.142419	3.68429	0.000229338	0.00182237	Myh7b	protein_coding
ENSMUSG00000090946	812.749	731.879	893.62	-0.286366	0.0777621	-3.68431	0.000229323	0.00182237	Ccdc71l	protein_coding
ENSMUSG00000028070	1455.02	1595.9	1314.13	0.25932	0.0679281	3.68266	0.000230815	0.00183164	Naxe	protein_coding
ENSMUSG00000023923	2222.11	2019.8	2424.42	-0.264585	0.0719884	-3.68123	0.000232112	0.00184025	Tbc1d5	protein_coding
ENSMUSG00000020715	707.932	795.17	620.694	0.329078	0.0852088	3.67978	0.00023344	0.00185	Ern1	protein_coding
ENSMUSG00000022747	648.193	574.588	721.798	-0.317971	0.0853778	-3.6795	0.000233694	0.00185124	St3gal6	protein_coding
ENSMUSG00000037251	1966.11	2133.23	1798.98	0.231376	0.0612459	3.67922	0.000233952	0.00185225	Pomk	protein_coding
ENSMUSG00000009406	2186.83	2354.34	2019.33	0.212221	0.0565763	3.67861	0.000234505	0.00185502	Elk1	protein_coding
ENSMUSG00000026333	370.472	422.395	318.549	0.368116	0.0945221	3.67855	0.000234565	0.00185502	Gin1	protein_coding
ENSMUSG00000031402	982.899	887.944	1077.85	-0.273017	0.0729936	-3.67788	0.000235176	0.00185753	Mpp1	protein_coding
ENSMUSG00000026511	1356.46	1494.29	1218.64	0.276195	0.0726726	3.67667	0.000236302	0.00186408	Srp9	protein_coding
ENSMUSG00000022831	170.774	138.035	203.513	-0.483431	0.135778	-3.67521	0.000237657	0.00187399	Hcls1	protein_coding
ENSMUSG00000039031	646.199	569.566	722.832	-0.325107	0.0868228	-3.6722	0.000240475	0.00189384	Arhgap18	protein_coding
ENSMUSG00000054409	664.857	568.525	761.189	-0.389469	0.103586	-3.6713	0.000241319	0.00189923	Tmem74	protein_coding
ENSMUSG00000026585	17723	16609.4	18836.6	-0.178659	0.048178	-3.67037	0.0002422	0.00190505	Kifap3	protein_coding
ENSMUSG00000093674	2558.2	2237.7	2878.71	-0.358448	0.101476	-3.66978	0.000242762	0.00190867	Rpl41	protein_coding
ENSMUSG00000041058	2238.43	2033.57	2443.29	-0.26629	0.0725766	-3.66907	0.000243438	0.00191239	Wwp1	protein_coding
ENSMUSG00000031516	2960.06	3204.53	2715.58	0.228742	0.0611863	3.66555	0.000246806	0.00193564	Dctn6	protein_coding
ENSMUSG00000027012	8971.28	8362.46	9580.09	-0.193396	0.0522373	-3.66453	0.000247791	0.00194175	Dync1i2	protein_coding
ENSMUSG00000020639	528.831	594.438	463.223	0.339216	0.0898035	3.66349	0.000248801	0.00194805	Pfn4	protein_coding
ENSMUSG00000031388	604.328	535.655	673.001	-0.299928	0.0776746	-3.66298	0.000249301	0.00195115	Naa10	protein_coding
ENSMUSG00000027776	66.0055	87.8141	44.1969	0.693774	0.173378	3.66261	0.000249659	0.00195315	Il12a	protein_coding
ENSMUSG00000076431	3691.45	3293.52	4089.38	-0.288935	0.0759829	-3.66158	0.000250662	0.00195856	Sox4	protein_coding
ENSMUSG00000040385	8025.71	7344.49	8706.94	-0.246369	0.0670811	-3.66042	0.000251797	0.00196662	Ppp1ca	protein_coding
ENSMUSG00000050222	242.048	199.709	284.387	-0.449864	0.11598	-3.65948	0.000252725	0.00197305	Il17d	protein_coding
ENSMUSG00000064284	243.854	282.185	205.524	0.419273	0.115905	3.65916	0.000253047	0.00197475	Cdpf1	protein_coding
ENSMUSG00000038695	857.329	955.369	759.289	0.328684	0.0916814	3.6563	0.000255882	0.00199522	Josd2	protein_coding
ENSMUSG00000007415	2651.36	2428.75	2873.98	-0.24305	0.066208	-3.65564	0.000256537	0.00199951	Gatad1	protein_coding
ENSMUSG00000028893	537.194	603.918	470.47	0.341004	0.091575	3.65458	0.000257605	0.002007	Sesn2	protein_coding
ENSMUSG00000039531	590.744	659.556	521.933	0.319364	0.0850282	3.65337	0.000258823	0.00201566	Zufsp	protein_coding
ENSMUSG00000025271	72.7382	53.2593	92.217	-0.609152	0.16115	-3.65202	0.000260182	0.00202481	Pfkfb1	protein_coding
ENSMUSG00000042305	3778.63	3488.58	4068.68	-0.226513	0.0620888	-3.6513	0.000260914	0.00202944	Tmem183a	protein_coding
ENSMUSG00000030036	879.383	774.794	983.971	-0.323437	0.0863628	-3.65001	0.000262234	0.00203744	Mogs	protein_coding
ENSMUSG00000035298	29.7785	42.3891	17.168	0.710724	0.191681	3.64998	0.000262266	0.00203744	Klhl35	protein_coding
ENSMUSG00000023940	48.8387	33.7356	63.9418	-0.656699	0.173703	-3.64936	0.000262892	0.00204063	Sgo1	protein_coding
ENSMUSG00000034858	1867.83	2054.2	1681.45	0.284056	0.0775381	3.64866	0.000263611	0.00204537	Fam214a	protein_coding
ENSMUSG00000040128	852.793	763.947	941.638	-0.287444	0.0765368	-3.64846	0.000263814	0.0020461	Pnrc1	protein_coding
ENSMUSG00000040852	626.359	708.162	544.557	0.361375	0.0994118	3.64833	0.000263951	0.00204632	Plekhh2	protein_coding
ENSMUSG00000028567	1649.93	1808.06	1491.8	0.266336	0.0714602	3.6476	0.000264699	0.00205128	Txndc12	protein_coding
ENSMUSG00000023960	9964.92	10761.5	9168.31	0.220645	0.0593027	3.645	0.000267389	0.0020662	Enpp5	protein_coding
ENSMUSG00000031104	608.081	534.675	681.486	-0.341583	0.0940696	-3.64446	0.00026795	0.00206969	Rab33a	protein_coding
ENSMUSG00000026728	1824.76	1654.12	1995.4	-0.252514	0.0671273	-3.64331	0.000269159	0.00207733	Vim	protein_coding
ENSMUSG00000061046	3116.54	2873.07	3360.01	-0.224454	0.0611516	-3.64204	0.000270483	0.00208669	Haghl	protein_coding
ENSMUSG00000029775	8852.16	8149.52	9554.8	-0.223084	0.0603412	-3.64186	0.000270679	0.00208736	Klhdc10	protein_coding
ENSMUSG00000059981	6443.96	5903.77	6984.15	-0.223855	0.0595617	-3.64142	0.000271133	0.00209	Taok2	protein_coding
ENSMUSG00000037316	2596.54	2823.88	2369.21	0.24323	0.0655696	3.63933	0.000273348	0.00210536	Bag4	protein_coding
ENSMUSG00000024925	347.873	284.776	410.97	-0.463253	0.121255	-3.63894	0.000273759	0.00210767	Rnaseh2c	protein_coding
ENSMUSG00000038916	2502.85	2261.95	2743.76	-0.26237	0.0700777	-3.63695	0.000275887	0.00212232	Soga3	protein_coding
ENSMUSG00000024427	562.425	495.105	629.745	-0.325922	0.0871222	-3.63659	0.000276268	0.00212439	Spry4	protein_coding
ENSMUSG00000021366	4108.1	3795	4421.2	-0.230293	0.0638961	-3.63606	0.000276837	0.0021279	Hivep1	protein_coding
ENSMUSG00000040712	9761.65	10560.5	8962.77	0.23463	0.064059	3.63459	0.000278426	0.00213854	Camta2	protein_coding
ENSMUSG00000029571	8339.33	8999.93	7678.74	0.216283	0.0581294	3.63253	0.000280652	0.00215372	Tmem106b	protein_coding
ENSMUSG00000014245	356.092	405.043	307.141	0.364398	0.0952911	3.63127	0.000282026	0.00216252	Pigl	protein_coding
ENSMUSG00000031357	2179.8	2395.93	1963.68	0.267883	0.0712066	3.63127	0.000282028	0.00216252	Syap1	protein_coding
ENSMUSG00000008035	2338.88	2077.54	2600.23	-0.309371	0.0837281	-3.63026	0.000283136	0.00217014	Mid1ip1	protein_coding
ENSMUSG00000061288	3699.72	3419.99	3979.45	-0.21672	0.0591669	-3.62977	0.000283675	0.00217324	Taok3	protein_coding
ENSMUSG00000006169	2398.12	2580.65	2215.59	0.227	0.0629225	3.6288	0.000284744	0.00217893	Clint1	protein_coding
ENSMUSG00000028883	1470.91	1322.57	1619.24	-0.27825	0.0746984	-3.62824	0.000285361	0.00218188	Sema3a	protein_coding
ENSMUSG00000061411	3387.7	3052.39	3723.01	-0.266232	0.070838	-3.62813	0.000285485	0.00218195	Nol4l	protein_coding
ENSMUSG00000028409	2669.81	2886.5	2453.11	0.220964	0.0592403	3.62721	0.000286497	0.00218879	Smu1	protein_coding
ENSMUSG00000038400	2115.86	1924.68	2307.03	-0.255667	0.0695284	-3.62586	0.000287999	0.00219938	Pmepa1	protein_coding
ENSMUSG00000038417	1814.27	1678.34	1950.21	-0.21393	0.0583397	-3.62542	0.000288487	0.00220222	Fig4	protein_coding
ENSMUSG00000004843	3336.31	3070.81	3601.8	-0.235499	0.0652188	-3.62368	0.000290446	0.00221627	Chmp2b	protein_coding
ENSMUSG00000021428	1025.04	1124.35	925.734	0.268012	0.0720954	3.62356	0.000290571	0.00221634	Riok1	protein_coding
ENSMUSG00000006390	428.26	366.197	490.323	-0.392319	0.106113	-3.62334	0.000290822	0.00221736	Elovl1	protein_coding
ENSMUSG00000026816	900.269	983.01	817.529	0.263205	0.0721748	3.62296	0.000291255	0.00221887	Gtf3c5	protein_coding
ENSMUSG00000017664	1396.07	1518.41	1273.74	0.244451	0.0660956	3.62249	0.000291779	0.00222196	Slc35c2	protein_coding
ENSMUSG00000000088	5201.29	4696.64	5705.94	-0.282737	0.0787338	-3.61977	0.000294863	0.00224364	Cox5a	protein_coding
ENSMUSG00000055866	1255.68	1381.14	1130.21	0.289882	0.0813308	3.61789	0.00029701	0.00225725	Per2	protein_coding
ENSMUSG00000038371	4640.51	4286.91	4994.12	-0.226249	0.0627644	-3.61698	0.00029806	0.00226341	Sbf2	protein_coding
ENSMUSG00000030327	7192.56	7726.2	6658.92	0.207889	0.0566156	3.61679	0.000298276	0.00226414	Necap1	protein_coding
ENSMUSG00000031508	3620.14	3869.17	3371.1	0.196915	0.0538989	3.61558	0.000299679	0.00227297	Ankrd10	protein_coding
ENSMUSG00000032375	1324.84	1214.7	1434.98	-0.240304	0.0661322	-3.61297	0.000302712	0.00229229	Aph1b	protein_coding
ENSMUSG00000042104	3723.38	3998.06	3448.69	0.207262	0.0565361	3.61178	0.000304104	0.00230099	Uggt2	protein_coding
ENSMUSG00000029600	731.868	646.597	817.139	-0.330226	0.0928053	-3.61039	0.000305733	0.00231054	Rita1	protein_coding
ENSMUSG00000009647	2016.6	1861.8	2171.4	-0.213176	0.0578857	-3.60814	0.000308405	0.0023298	Mcu	protein_coding
ENSMUSG00000040697	2275.64	2483.45	2067.83	0.265799	0.073989	3.60786	0.000308738	0.00233139	Dnajc16	protein_coding
ENSMUSG00000005973	2120.75	1931.52	2309.99	-0.255612	0.0704844	-3.60647	0.000310395	0.00234202	Rcn1	protein_coding
ENSMUSG00000004952	283.916	236.115	331.717	-0.43737	0.120022	-3.60555	0.000311487	0.00234839	Rasa4	protein_coding
ENSMUSG00000024883	1527.85	1952.07	1103.63	0.604509	0.171278	3.60442	0.000312849	0.00235772	Rin1	protein_coding
ENSMUSG00000028039	1784.01	1615.84	1952.17	-0.261231	0.071027	-3.60387	0.000313515	0.0023618	Efna3	protein_coding
ENSMUSG00000074627	34.8817	48.1265	21.637	0.674426	0.189003	3.60366	0.000313763	0.0023619	Mroh8	protein_coding
ENSMUSG00000041351	7934.11	7170.86	8697.36	-0.261826	0.0705466	-3.60298	0.000314595	0.00236522	Rap1gap	protein_coding
ENSMUSG00000060176	190.407	226.76	154.054	0.484638	0.130836	3.60218	0.000315562	0.00237155	Kif27	protein_coding
ENSMUSG00000023021	2285.15	2110.99	2459.31	-0.22294	0.0617653	-3.60127	0.000316664	0.00237888	Cers5	protein_coding
ENSMUSG00000022122	5856.54	5388.65	6324.43	-0.232941	0.0645749	-3.59982	0.000318438	0.00239031	Ednrb	protein_coding
ENSMUSG00000001280	1525.07	1370.33	1679.81	-0.28832	0.079828	-3.59914	0.000319275	0.00239564	Sp1	protein_coding
ENSMUSG00000000743	3553.42	3854.89	3251.95	0.229513	0.0619206	3.59811	0.00032054	0.00240322	Chmp1a	protein_coding
ENSMUSG00000019124	13691.1	12622.5	14759.7	-0.21847	0.0597347	-3.59813	0.000320509	0.00240322	Scrn1	protein_coding
ENSMUSG00000021013	874.678	962.119	787.237	0.271495	0.0731502	3.59672	0.000322256	0.00241513	Ttc8	protein_coding
ENSMUSG00000022051	3394.24	3742.2	3046.27	0.284378	0.0773739	3.5963	0.000322778	0.00241808	Bnip3l	protein_coding
ENSMUSG00000051998	32.7569	19.531	45.9829	-0.727099	0.189535	-3.59587	0.000323305	0.00242107	Lax1	protein_coding
ENSMUSG00000008892	1318.08	1210.54	1425.63	-0.242232	0.0679053	-3.59509	0.000324277	0.00242739	Vdac3	protein_coding
ENSMUSG00000048546	676.809	590.722	762.895	-0.336295	0.0891922	-3.59391	0.000325755	0.00243556	Tob2	protein_coding
ENSMUSG00000038485	6872.67	7305.09	6440.26	0.18204	0.0503231	3.59147	0.000328824	0.00245656	Socs7	protein_coding
ENSMUSG00000044367	328.478	282.511	374.445	-0.374274	0.101641	-3.59118	0.000329186	0.00245829	Slc16a13	protein_coding
ENSMUSG00000021699	2473.15	2304.23	2642.08	-0.207613	0.0581647	-3.59092	0.000329511	0.00245864	Pde4d	protein_coding
ENSMUSG00000021876	658.495	560.064	756.927	-0.403417	0.11243	-3.59079	0.000329674	0.00245864	Rnase4	protein_coding
ENSMUSG00000047557	1612.16	1462.78	1761.55	-0.266891	0.0742394	-3.59073	0.000329753	0.00245864	Lxn	protein_coding
ENSMUSG00000107283	1152.06	1261.94	1042.18	0.267094	0.0731429	3.59088	0.000329558	0.00245864	Mpv17
ENSMUSG00000043008	112.253	89.987	134.519	-0.497643	0.139333	-3.58919	0.000331704	0.00247138	Klhl6	protein_coding
ENSMUSG00000039556	142.037	167.856	116.218	0.464568	0.130366	3.58855	0.000332524	0.00247637	Ppp1r3f	protein_coding
ENSMUSG00000007458	2174.09	2347.37	2000.82	0.227754	0.0629685	3.58623	0.000335491	0.00249649	M6pr	protein_coding
ENSMUSG00000026259	6995.6	6307.6	7683.61	-0.278096	0.0767733	-3.58613	0.000335621	0.00249649	Ngef	protein_coding
ENSMUSG00000040003	4236.7	3860.43	4612.96	-0.246028	0.0671118	-3.58621	0.000335523	0.00249649	Magi2	protein_coding
ENSMUSG00000029518	3523.09	3289.97	3756.21	-0.192749	0.0534545	-3.58503	0.000337039	0.00250605	Rab35	protein_coding
ENSMUSG00000041488	1496.81	1609.28	1384.34	0.221388	0.0617777	3.58319	0.00033942	0.00251879	Stx3	protein_coding
ENSMUSG00000021259	6036.68	6539.31	5534.06	0.240981	0.0670977	3.58263	0.000340154	0.00252226	Cyp46a1	protein_coding
ENSMUSG00000034781	6374.26	6823.32	5925.19	0.191031	0.0521535	3.58065	0.000342744	0.00254047	Gna11	protein_coding
ENSMUSG00000079003	1190.95	1051	1330.89	-0.319515	0.0868165	-3.57855	0.000345504	0.00255993	Samd1	protein_coding
ENSMUSG00000053334	480.683	541.007	420.359	0.339841	0.0923523	3.57615	0.000348693	0.00258153	Ficd	protein_coding
ENSMUSG00000039117	1014.93	912.209	1117.64	-0.271709	0.073057	-3.57548	0.000349585	0.00258712	Taf4	protein_coding
ENSMUSG00000063704	215.658	169.037	262.279	-0.516855	0.152285	-3.57452	0.000350876	0.00259566	Mapk15	protein_coding
ENSMUSG00000064068	1070.97	1163.92	978.024	0.25306	0.0708128	3.57332	0.000352477	0.00260648	Mtx1	protein_coding
ENSMUSG00000033396	1077.94	1168.83	987.045	0.241617	0.066994	3.57313	0.000352744	0.00260743	Spg11	protein_coding
ENSMUSG00000000058	1559.39	1323.26	1795.52	-0.405377	0.113099	-3.5724	0.00035373	0.0026137	Cav2	protein_coding
ENSMUSG00000015143	4141.74	3687.24	4596.24	-0.294686	0.0793574	-3.56999	0.000357	0.0026358	Actn1	protein_coding
ENSMUSG00000024816	462.598	403.011	522.185	-0.349033	0.0954887	-3.56913	0.000358168	0.00264236	Frmd8	protein_coding
ENSMUSG00000021928	628.354	557.073	699.635	-0.320368	0.089945	-3.56879	0.000358628	0.00264473	Ebpl	protein_coding
ENSMUSG00000029782	1193.57	1302.65	1084.48	0.25148	0.0688069	3.56638	0.000361943	0.00266709	Tmem209	protein_coding
ENSMUSG00000022400	3406.57	3679.22	3133.91	0.220864	0.0605695	3.56489	0.00036401	0.00267814	Rbx1	protein_coding
ENSMUSG00000027244	3098.36	3330.01	2866.72	0.219587	0.0616472	3.56301	0.000366628	0.00269636	Atg13	protein_coding
ENSMUSG00000074102	3003.35	2739.16	3267.54	-0.249916	0.0695026	-3.56278	0.000366955	0.00269771	Rbm15b	protein_coding
ENSMUSG00000029428	1132.25	1031.79	1232.71	-0.245952	0.0675408	-3.56073	0.000369827	0.00271777	Stx2	protein_coding
ENSMUSG00000022414	1377.63	1512.67	1242.59	0.261364	0.0702308	3.56062	0.00036998	0.00271783	Tab1	protein_coding
ENSMUSG00000038888	288.768	244.872	332.665	-0.396201	0.106045	-3.55879	0.000372562	0.00273574	Ctu1	protein_coding
ENSMUSG00000063887	4519.56	4155.54	4883.59	-0.233827	0.0654828	-3.55789	0.000373846	0.0027441	Nlgn1	protein_coding
ENSMUSG00000034163	4642.82	4924.98	4360.67	0.182438	0.0513692	3.55416	0.000379184	0.00278005	Zfc3h1	protein_coding
ENSMUSG00000041671	887.074	978.252	795.896	0.279182	0.0756881	3.55405	0.000379351	0.00278019	Pyroxd1	protein_coding
ENSMUSG00000002205	951.344	1049.49	853.203	0.267608	0.0709093	3.55362	0.000379962	0.00278359	Vrk3	protein_coding
ENSMUSG00000026784	668.49	602.294	734.686	-0.279076	0.0771894	-3.55328	0.000380454	0.00278503	Pdss1	protein_coding
ENSMUSG00000032839	2249.56	2065.22	2433.91	-0.231815	0.0642922	-3.5522	0.000382023	0.00279544	Trpc1	protein_coding
ENSMUSG00000074748	18697.2	19914.4	17479.9	0.17649	0.0486882	3.55158	0.000382928	0.00280098	Atxn7l3b	protein_coding
ENSMUSG00000020956	415.244	473.548	356.94	0.364553	0.0959113	3.55116	0.000383538	0.00280389	Dtd2	protein_coding
ENSMUSG00000041431	48.4837	32.733	64.2344	-0.668628	0.178114	-3.5511	0.000383623	0.00280389	Ccnb1	protein_coding
ENSMUSG00000026374	4384.77	4704.56	4064.98	0.211694	0.0592402	3.54936	0.000386173	0.00282144	Tsn	protein_coding
ENSMUSG00000027589	3411.58	3687.34	3135.83	0.235446	0.0662911	3.54739	0.000389073	0.00283933	Pcmtd2	protein_coding
ENSMUSG00000037572	314.376	271.032	357.721	-0.373625	0.104834	-3.54715	0.000389417	0.00284074	Wdhd1	protein_coding
ENSMUSG00000042364	1267.46	1166.74	1368.18	-0.227233	0.0633996	-3.54538	0.000392053	0.00285844	Snx18	protein_coding
ENSMUSG00000038506	1931.36	2077.33	1785.39	0.212917	0.0591231	3.54516	0.000392373	0.002859	Dcun1d2	protein_coding
ENSMUSG00000020671	10287.3	9609.54	10965.1	-0.186801	0.0520988	-3.54452	0.000393326	0.00286373	Rab10	protein_coding
ENSMUSG00000032386	2104.04	2269.63	1938.45	0.221461	0.0614799	3.5446	0.000393214	0.00286373	Trip4	protein_coding
ENSMUSG00000014550	2664.29	2880.07	2448.52	0.226155	0.0625464	3.54376	0.000394465	0.00287092	Rbsn	protein_coding
ENSMUSG00000041912	2213.71	2049.23	2378.18	-0.208555	0.0579518	-3.5422	0.000396803	0.00288682	Tdrkh	protein_coding
ENSMUSG00000026853	1585.23	1412.73	1757.72	-0.28014	0.074261	-3.54189	0.000397275	0.00288816	Crat	protein_coding
ENSMUSG00000030909	25.2701	35.2839	15.2563	0.663635	0.191532	3.54188	0.000397292	0.00288816	Anks4b	protein_coding
ENSMUSG00000024948	2552.12	2317.99	2786.25	-0.24653	0.067284	-3.54114	0.000398395	0.00289506	Map4k2	protein_coding
ENSMUSG00000055491	1193.53	1060.42	1326.63	-0.292696	0.0783763	-3.54092	0.000398728	0.00289637	Pprc1	protein_coding
ENSMUSG00000037600	8.88794	15.4597	2.31618	0.632036	0.172224	3.54062	0.00039919	0.00289861	Kdf1	protein_coding
ENSMUSG00000031633	28170.5	26236	30105	-0.204643	0.0579304	-3.5387	0.000402096	0.00291635	Slc25a4	protein_coding
ENSMUSG00000022843	2079.27	1900.03	2258.51	-0.236446	0.0651732	-3.53818	0.0004029	0.00291994	Clcn2	protein_coding
ENSMUSG00000037606	1159.03	1061.31	1256.75	-0.240806	0.0675769	-3.53781	0.000403453	0.00292283	Osbpl5	protein_coding
ENSMUSG00000000794	1639.33	1470.15	1808.51	-0.27855	0.0760517	-3.5373	0.000404233	0.00292624	Kcnn3	protein_coding
ENSMUSG00000029179	580.073	636.162	523.984	0.279127	0.0791196	3.53733	0.0004042	0.00292624	Zcchc4	protein_coding
ENSMUSG00000005447	612.504	538.893	686.114	-0.340716	0.100404	-3.53709	0.000404558	0.00292747	Pafah1b3	protein_coding
ENSMUSG00000023942	715.314	630.649	799.979	-0.319641	0.0872733	-3.53637	0.000405671	0.0029344	Slc29a1	protein_coding
ENSMUSG00000026799	725.935	801.916	649.954	0.294441	0.0825685	3.53559	0.000406869	0.00294194	Med27	protein_coding
ENSMUSG00000048439	478.563	534.576	422.549	0.319189	0.0881917	3.53507	0.000407672	0.00294662	Nupl2	protein_coding
ENSMUSG00000069911	159.566	118.289	200.844	-0.595208	0.156585	-3.53464	0.000408338	0.00295031	Fam196b	protein_coding
ENSMUSG00000022961	20143.5	21403.9	18883	0.182013	0.0512018	3.53396	0.000409381	0.00295671	Son	protein_coding
ENSMUSG00000036667	17298.6	15873.2	18723.9	-0.220658	0.0605379	-3.53338	0.000410286	0.00295985	Tcaf1	protein_coding
ENSMUSG00000012429	624.704	701.008	548.401	0.328957	0.0891825	3.53253	0.000411603	0.00296709	Mplkip	protein_coding
ENSMUSG00000037601	2958.85	2717.15	3200.55	-0.236835	0.0667864	-3.53256	0.000411555	0.00296709	Nme1	protein_coding
ENSMUSG00000039354	1893.98	2077.95	1710.01	0.267955	0.0742107	3.5322	0.000412114	0.00296855	Smarcal1	protein_coding
ENSMUSG00000044641	216.383	250.766	181.999	0.42199	0.118795	3.53132	0.000413487	0.00297727	Pard6b	protein_coding
ENSMUSG00000028456	4143.03	3842.12	4443.94	-0.206058	0.0576703	-3.53075	0.00041439	0.00298263	Unc13b	protein_coding
ENSMUSG00000011884	1525.44	1350.29	1700.58	-0.313751	0.0863171	-3.53022	0.00041521	0.00298626	Gltp	protein_coding
ENSMUSG00000003527	1298	1401.64	1194.36	0.231232	0.065166	3.52984	0.000415814	0.00298946	Dgcr14	protein_coding
ENSMUSG00000061315	1184.86	1090.15	1279.58	-0.236865	0.0676056	-3.52955	0.000416265	0.00299062	Naca	protein_coding
ENSMUSG00000004980	23935.6	21690.9	26180.3	-0.251705	0.0688715	-3.52894	0.000417232	0.00299624	Hnrnpa2b1	protein_coding
ENSMUSG00000029547	3734.61	4051.95	3417.28	0.252586	0.0725333	3.52403	0.000425044	0.0030454	Ints1	protein_coding
ENSMUSG00000024759	1617.13	1487.24	1747.02	-0.232407	0.0656661	-3.52318	0.000426406	0.00305284	Atl3	protein_coding
ENSMUSG00000030094	841.067	913.972	768.161	0.252799	0.0716752	3.5229	0.00042685	0.00305371	Xpc	protein_coding
ENSMUSG00000050132	1822.64	1647.38	1997.89	-0.261764	0.0722025	-3.52296	0.000426752	0.00305371	Sarm1	protein_coding
ENSMUSG00000030589	171.84	205.459	138.221	0.491159	0.144158	3.52187	0.000428514	0.00306445	Rasgrp4	protein_coding
ENSMUSG00000035121	105.494	127.257	83.7317	0.507195	0.14281	3.5216	0.000428957	0.00306646	Neil2	protein_coding
ENSMUSG00000028657	4652.1	4959.33	4344.87	0.189081	0.0531768	3.52149	0.000429126	0.0030665	Ppt1	protein_coding
ENSMUSG00000024769	275.888	314.768	237.008	0.38534	0.108585	3.5204	0.000430899	0.00307569	Cdc42bpg	protein_coding
ENSMUSG00000039878	30.9083	42.7768	19.0398	0.689455	0.188414	3.52053	0.000430682	0.00307569	Slc39a5	protein_coding
ENSMUSG00000020889	2058.58	2247.48	1869.68	0.263673	0.0749217	3.51768	0.000435343	0.00310623	Nr1d1	protein_coding
ENSMUSG00000023259	696.041	622.173	769.909	-0.290853	0.0809004	-3.51672	0.000436912	0.00311508	Slc26a6	protein_coding
ENSMUSG00000022508	1190.78	1280.6	1100.96	0.236584	0.0695852	3.5148	0.000440093	0.00313539	Bcl6	protein_coding
ENSMUSG00000056394	745.317	659.471	831.163	-0.319634	0.0907953	-3.51484	0.000440018	0.00313539	Lig1	protein_coding
ENSMUSG00000031660	3859.89	4144.63	3575.16	0.206448	0.0577488	3.51435	0.000440824	0.00313588	Brd7	protein_coding
ENSMUSG00000091898	116.766	150.596	82.9368	0.61144	0.172321	3.51359	0.000442095	0.00314373	Tnnc1	protein_coding
ENSMUSG00000019437	950.058	854.014	1046.1	-0.284398	0.0803114	-3.51254	0.000443843	0.00315497	Tlcd1	protein_coding
ENSMUSG00000004561	1484.93	1621.64	1348.21	0.259594	0.0730444	3.51139	0.00044577	0.0031651	Mettl17	protein_coding
ENSMUSG00000026826	1905.07	2116.87	1693.27	0.315185	0.0901774	3.51146	0.000445652	0.0031651	Nr4a2	protein_coding
ENSMUSG00000055435	1515.11	1357.76	1672.47	-0.289538	0.0816014	-3.50931	0.000449275	0.00318759	Maf	protein_coding
ENSMUSG00000064247	387.714	448.317	327.111	0.410833	0.114476	3.50893	0.000449909	0.00319089	Plcxd1	protein_coding
ENSMUSG00000028552	10377.8	9526.13	11229.4	-0.24215	0.0693666	-3.50696	0.000453265	0.00321349	Eps15	protein_coding
ENSMUSG00000039485	17935.6	16700.7	19170.6	-0.188487	0.0527097	-3.50461	0.000457273	0.00323595	Tspyl4	protein_coding
ENSMUSG00000004394	1909.97	2067.3	1752.65	0.228648	0.063989	3.50379	0.000458693	0.00324391	Tmed4	protein_coding
ENSMUSG00000041870	1883.95	1726.38	2041.51	-0.224671	0.0620716	-3.50363	0.000458967	0.00324418	Ankrd13a	protein_coding
ENSMUSG00000040389	7069.68	6558.4	7580.95	-0.203656	0.0573138	-3.50316	0.000459769	0.00324863	Wdr47	protein_coding
ENSMUSG00000038178	2216.24	1982.19	2450.29	-0.279936	0.0763749	-3.50179	0.000462137	0.00326171	Slc43a2	protein_coding
ENSMUSG00000026311	2556.81	2804.47	2309.15	0.292569	0.0873807	3.50138	0.000462854	0.0032646	Asb1	protein_coding
ENSMUSG00000028782	15978	17156.4	14799.7	0.223421	0.0645455	3.50136	0.000462892	0.0032646	Adgrb2	protein_coding
ENSMUSG00000030282	4395.45	4089.67	4701.23	-0.198847	0.0562229	-3.50069	0.000464054	0.00326913	Cmas	protein_coding
ENSMUSG00000024096	2379.04	2205	2553.08	-0.203852	0.0571946	-3.49922	0.00046662	0.00328599	Ralbp1	protein_coding
ENSMUSG00000017801	1415.72	1290.54	1540.9	-0.253889	0.0721431	-3.49863	0.000467652	0.00328868	Mlx	protein_coding
ENSMUSG00000036298	4500.83	4939.56	4062.09	0.28619	0.083434	3.49871	0.000467512	0.00328868	Slc2a13	protein_coding
ENSMUSG00000037339	1021.48	1114.05	928.91	0.258771	0.0735927	3.49861	0.000467698	0.00328868	Fam53a	protein_coding
ENSMUSG00000038893	173.725	203.846	143.605	0.446624	0.122611	3.4985	0.000467877	0.00328871	Fam117a	protein_coding
ENSMUSG00000057229	1066.98	1157.07	976.885	0.235612	0.0660688	3.49822	0.000468368	0.00329094	Dmac2	protein_coding
ENSMUSG00000026427	1632.72	1761.43	1504.02	0.220157	0.0618595	3.4976	0.000469462	0.0032974	Eif2d	protein_coding
ENSMUSG00000066643	2477.2	2691.84	2262.57	0.243806	0.0686823	3.49746	0.000469708	0.0032979	Wdr35	protein_coding
ENSMUSG00000001750	497.038	424.977	569.1	-0.381641	0.105153	-3.49708	0.000470374	0.00330135	Tcirg1	protein_coding
ENSMUSG00000030138	2354.9	2519.56	2190.24	0.193924	0.0544223	3.49689	0.000470709	0.00330248	Bms1	protein_coding
ENSMUSG00000033184	4739.05	5114.12	4363.99	0.218562	0.0611866	3.49604	0.00047222	0.00331062	Tmed7	protein_coding
ENSMUSG00000051557	1005.81	909.887	1101.72	-0.264889	0.0742943	-3.49584	0.000472573	0.00331187	Pusl1	protein_coding
ENSMUSG00000038286	609.939	676.924	542.954	0.304666	0.0862618	3.49481	0.000474408	0.00332226	Bphl	protein_coding
ENSMUSG00000049184	1540.4	1356.62	1724.18	-0.323241	0.0900241	-3.49485	0.000474331	0.00332226	Purg	protein_coding
ENSMUSG00000035245	2257.15	2086.91	2427.38	-0.219054	0.0623578	-3.493	0.000477619	0.00334227	Eogt	protein_coding
ENSMUSG00000031167	1403.88	1269.66	1538.11	-0.264219	0.074004	-3.49277	0.000478041	0.00334399	Rbm3	protein_coding
ENSMUSG00000026032	1420.08	1582.66	1257.51	0.306948	0.0845822	3.49184	0.000479708	0.00335193	Ndufb3	protein_coding
ENSMUSG00000031885	1487.02	1617.84	1356.2	0.24996	0.0709072	3.4906	0.000481929	0.0033662	Cbfb	protein_coding
ENSMUSG00000037993	1361.49	1485.38	1237.6	0.264592	0.0762945	3.48955	0.000483837	0.00337768	Dhx38	protein_coding
ENSMUSG00000020929	3782.31	4083.42	3481.2	0.236948	0.0685243	3.48879	0.000485205	0.00338533	Eftud2	protein_coding
ENSMUSG00000029414	100.169	78.7134	121.624	-0.520828	0.144958	-3.48862	0.000485529	0.00338634	Kntc1	protein_coding
ENSMUSG00000026807	78.8173	99.2618	58.3727	0.594918	0.15647	3.48715	0.000488205	0.00340249	Ak8	protein_coding
ENSMUSG00000021190	5057.43	4770.17	5344.7	-0.17614	0.0509216	-3.48666	0.000489087	0.00340738	Lgmn	protein_coding
ENSMUSG00000039145	6775.34	6051.12	7499.55	-0.289953	0.0805713	-3.48371	0.00049452	0.00344016	Camk1d	protein_coding
ENSMUSG00000055762	2346.7	2172.23	2521.16	-0.219829	0.0633113	-3.48272	0.000496353	0.00345037	Eef1d	protein_coding
ENSMUSG00000019969	2488.25	2295.45	2681.05	-0.218542	0.0618552	-3.47746	0.000506181	0.00351095	Psen1	protein_coding
ENSMUSG00000026335	7022.86	7579.83	6465.9	0.229309	0.065687	3.47678	0.000507482	0.00351739	Pam	protein_coding
ENSMUSG00000028640	45.624	60.7746	30.4734	0.658191	0.18349	3.47651	0.000507991	0.00351962	Tfap2c	protein_coding
ENSMUSG00000009733	1165.34	1266.36	1064.33	0.250384	0.0716389	3.47483	0.000511169	0.00353775	Tfcp2	protein_coding
ENSMUSG00000025854	1582.65	1396.05	1769.26	-0.314075	0.0866108	-3.4743	0.00051219	0.00354352	Fam20c	protein_coding
ENSMUSG00000030800	33.4554	46.3374	20.5734	0.674549	0.19073	3.47346	0.000513791	0.0035533	Prss8	protein_coding
ENSMUSG00000020257	7685.76	7218.24	8153.29	-0.173198	0.0493675	-3.47333	0.00051405	0.00355379	Wdr82	protein_coding
ENSMUSG00000070471	105.214	81.9303	128.497	-0.52828	0.148001	-3.472	0.000516599	0.0035688	Erich6	protein_coding
ENSMUSG00000060950	586.914	528.803	645.024	-0.277904	0.0791184	-3.47061	0.00051928	0.0035847	Trmt61a	protein_coding
ENSMUSG00000006373	10494	9797.34	11190.6	-0.185757	0.0527805	-3.46786	0.000524628	0.00361634	Pgrmc1	protein_coding
ENSMUSG00000000167	100.565	124.05	77.0794	0.558923	0.147453	3.46735	0.000525623	0.00362055	Pih1d2	protein_coding
ENSMUSG00000026109	2508.85	2332.29	2685.4	-0.204396	0.0586108	-3.46412	0.000531971	0.00365762	Tmeff2	protein_coding
ENSMUSG00000033458	367.374	420.98	313.768	0.381656	0.103744	3.46414	0.000531932	0.00365762	Fan1	protein_coding
ENSMUSG00000048163	534.253	455.332	613.174	-0.391796	0.10938	-3.46421	0.000531784	0.00365762	Selplg	protein_coding
ENSMUSG00000002996	1001.96	910.48	1093.43	-0.25528	0.0725682	-3.46328	0.000533635	0.00366772	Hbp1	protein_coding
ENSMUSG00000034290	2294.62	2467.71	2121.54	0.208172	0.0587256	3.46275	0.000534688	0.00367362	Nek9	protein_coding
ENSMUSG00000027331	184.263	152.288	216.238	-0.443041	0.127664	-3.4621	0.000535973	0.00367978	Knstrn	protein_coding
ENSMUSG00000039959	5380.43	4998.33	5762.54	-0.202822	0.0579898	-3.46192	0.000536339	0.00367991	Hip1	protein_coding
ENSMUSG00000026608	5287.39	5639.42	4935.36	0.191477	0.0548348	3.46074	0.000538688	0.00369037	Kctd3	protein_coding
ENSMUSG00000040040	1320.39	1429.34	1211.44	0.230935	0.0655696	3.46055	0.000539067	0.00369163	Ift88	protein_coding
ENSMUSG00000030842	1661.66	1799.55	1523.76	0.231092	0.0655144	3.46018	0.000539816	0.00369409	Lamtor1	protein_coding
ENSMUSG00000040289	1686.19	1514.89	1857.49	-0.281777	0.079667	-3.46023	0.000539722	0.00369409	Hey1	protein_coding
ENSMUSG00000037608	9646.72	10276	9017.4	0.184254	0.0525683	3.4595	0.000541189	0.0037008	Bclaf1	protein_coding
ENSMUSG00000019889	5176.52	4794.46	5558.58	-0.211651	0.0606869	-3.45836	0.000543468	0.0037137	Ptprk	protein_coding
ENSMUSG00000025173	2652.38	2853.14	2451.62	0.208996	0.0592218	3.45481	0.000550677	0.00375888	Wdr45b	protein_coding
ENSMUSG00000025980	3355.86	3117.71	3594.02	-0.207895	0.0600247	-3.45338	0.000553605	0.0037775	Hspd1	protein_coding
ENSMUSG00000042340	81.2396	99.7534	62.7258	0.537783	0.154126	3.45279	0.000554817	0.00378304	Ctf1	protein_coding
ENSMUSG00000028973	1646.59	1776.29	1516.89	0.222403	0.0634134	3.45265	0.000555101	0.00378361	Abcb8	protein_coding
ENSMUSG00000031577	814.286	891.975	736.596	0.268966	0.0770796	3.45138	0.000557737	0.00379884	Tti2	protein_coding
ENSMUSG00000037344	1126.82	1246.36	1007.28	0.299982	0.0862909	3.45142	0.00055765	0.00379884	Slc12a9	protein_coding
ENSMUSG00000026279	584.973	524.083	645.862	-0.292874	0.0839395	-3.44908	0.000562491	0.00382433	Thap4	protein_coding
ENSMUSG00000029910	590.198	530.056	650.34	-0.295067	0.0876717	-3.44691	0.000567037	0.00385386	Mad2l1	protein_coding
ENSMUSG00000005233	133.139	104.361	161.916	-0.52331	0.136745	-3.44626	0.000568406	0.00386177	Spc25	protein_coding
ENSMUSG00000034473	895.611	985.74	805.483	0.272166	0.0760435	3.44517	0.000570705	0.00387599	Sec22a	protein_coding
ENSMUSG00000032562	7799.77	7221.33	8378.2	-0.207857	0.0594594	-3.44051	0.000580625	0.00393771	Gnai2	protein_coding
ENSMUSG00000044216	3035.02	3367	2703.03	0.312309	0.0924856	3.44034	0.000580992	0.00393878	Kcnj4	protein_coding
ENSMUSG00000035725	825.894	742.036	909.752	-0.263417	0.0722269	-3.43914	0.000583559	0.00394769	Prkx	protein_coding
ENSMUSG00000026544	200.721	231.224	170.218	0.40788	0.121585	3.43704	0.000588119	0.00397569	Dusp23	protein_coding
ENSMUSG00000035759	227.724	261.632	193.816	0.395362	0.112482	3.43321	0.000596478	0.00402644	Bbs10	protein_coding
ENSMUSG00000036327	1452.64	1571.97	1333.31	0.226643	0.0645841	3.43282	0.000597336	0.00403079	Qsox2	protein_coding
ENSMUSG00000032890	3011.93	2744.14	3279.71	-0.257983	0.0755208	-3.43263	0.000597766	0.00403225	Rims3	protein_coding
ENSMUSG00000021423	287.614	246.317	328.912	-0.385044	0.110491	-3.43232	0.000598444	0.00403539	Ly86	protein_coding
ENSMUSG00000021003	1614.27	1744.34	1484.21	0.227747	0.0654363	3.43204	0.000599051	0.00403804	Galc	protein_coding
ENSMUSG00000045763	39943.3	36409.5	43477	-0.246111	0.0703448	-3.43165	0.000599915	0.00404242	Basp1	protein_coding
ENSMUSG00000027570	1760.66	1535.3	1986.02	-0.350002	0.101532	-3.43006	0.000603452	0.00406047	Col9a3	protein_coding
ENSMUSG00000008318	216.726	258.81	174.642	0.477541	0.127418	3.42968	0.000604299	0.00406472	Relt	protein_coding
ENSMUSG00000029403	5152.72	4745.55	5559.9	-0.230459	0.0671441	-3.42935	0.000605024	0.00406814	Cdkl2	protein_coding
ENSMUSG00000042042	1005.71	1102.86	908.566	0.261968	0.0737897	3.429	0.000605804	0.00407195	Csgalnact2	protein_coding
ENSMUSG00000048922	82.9438	64.2933	101.594	-0.524911	0.154054	-3.42887	0.000606094	0.00407244	Cdca2	protein_coding
ENSMUSG00000018040	1818.71	1662.03	1975.39	-0.258751	0.077383	-3.4286	0.000606706	0.00407283	Rrp7a	protein_coding
ENSMUSG00000045193	3361.51	3688.15	3034.88	0.265838	0.0751766	3.42868	0.000606514	0.00407283	Cirbp	protein_coding
ENSMUSG00000019471	4093.9	4392.15	3795.65	0.212354	0.0617093	3.42809	0.000607855	0.00407558	Cdc37	protein_coding
ENSMUSG00000064065	4798.03	4309.84	5286.22	-0.286076	0.0826122	-3.42659	0.000611205	0.00409514	Ipcef1	protein_coding
ENSMUSG00000023572	1844.04	1994.19	1693.9	0.228133	0.0654147	3.42644	0.000611545	0.00409596	Ccndbp1	protein_coding
ENSMUSG00000025737	1084.58	1184.41	984.746	0.249505	0.0704444	3.42442	0.000616114	0.0041251	Wdr24	protein_coding
ENSMUSG00000067336	10111	9395.64	10826.4	-0.203278	0.0588458	-3.4234	0.00061842	0.00413908	Bmpr2	protein_coding
ENSMUSG00000034714	648.394	573.04	723.749	-0.31278	0.087382	-3.42309	0.000619144	0.00414246	Ttyh2	protein_coding
ENSMUSG00000040269	447.747	513.161	382.334	0.377384	0.102958	3.42105	0.000623809	0.00416924	Mrps28	protein_coding
ENSMUSG00000006445	64.4305	47.8644	80.9965	-0.561566	0.168033	-3.42065	0.000624725	0.00417389	Epha2	protein_coding
ENSMUSG00000029263	790.668	869.582	711.753	0.275132	0.0790129	3.4194	0.000627601	0.00419162	Pigg	protein_coding
ENSMUSG00000031916	1057.62	1148.46	966.77	0.240081	0.0689857	3.41913	0.000628225	0.00419282	Cog8	protein_coding
ENSMUSG00000020946	4353.67	4645.8	4061.55	0.175613	0.0498378	3.41826	0.000630226	0.00420025	Gosr2	protein_coding
ENSMUSG00000071866	1841.43	1677.83	2005.03	-0.269386	0.0817215	-3.41777	0.000631355	0.00420629	Ppia	protein_coding
ENSMUSG00000046179	91.2709	70.4756	112.066	-0.541768	0.151263	-3.41708	0.000632959	0.004214	E2f8	protein_coding
ENSMUSG00000020075	1805.39	1653.97	1956.81	-0.225903	0.0640036	-3.41648	0.00063436	0.00422185	Ddx21	protein_coding
ENSMUSG00000057342	855.227	770.072	940.382	-0.273709	0.0779	-3.41626	0.000634865	0.00422372	Sphk2	protein_coding
ENSMUSG00000005373	161.279	136.04	186.519	-0.414006	0.124935	-3.41515	0.000637472	0.00423957	Mlxipl	protein_coding
ENSMUSG00000032410	2569.84	2756.78	2382.89	0.212809	0.0621134	3.41419	0.000639708	0.00425295	Xrn1	protein_coding
ENSMUSG00000021134	10131.4	10769.6	9493.15	0.181517	0.0527457	3.41277	0.000643071	0.00427079	Srsf5	protein_coding
ENSMUSG00000023932	1729.91	1851.62	1608.19	0.206229	0.060394	3.41202	0.000644833	0.00427949	Cdc5l	protein_coding
ENSMUSG00000032902	4800.26	4386.17	5214.34	-0.230017	0.0650871	-3.41076	0.000647811	0.00429775	Slc16a1	protein_coding
ENSMUSG00000023169	7326.07	6698.76	7953.37	-0.232058	0.0660132	-3.41038	0.000648717	0.00430225	Slc38a1	protein_coding
ENSMUSG00000041028	11717.6	12615.9	10819.3	0.212739	0.0612242	3.40866	0.000652832	0.00432347	Ghitm	protein_coding
ENSMUSG00000054199	2433.41	2626.54	2240.28	0.230085	0.0672264	3.40817	0.000654001	0.00432969	Gon4l	protein_coding
ENSMUSG00000032218	116.596	92.3928	140.799	-0.503642	0.142761	-3.40708	0.000656608	0.00434543	Ccnb2	protein_coding
ENSMUSG00000032422	1868.05	1728.47	2007.63	-0.210844	0.0609451	-3.40462	0.00066256	0.00438022	Snx14	protein_coding
ENSMUSG00000035898	1108.63	1018.51	1198.74	-0.230059	0.0665262	-3.40348	0.000665324	0.00439695	Uba6	protein_coding
ENSMUSG00000081683	203.922	167.136	240.708	-0.455935	0.13326	-3.40283	0.000666916	0.00440593	Fzd10	protein_coding
ENSMUSG00000057963	2660.92	2497.88	2823.96	-0.182429	0.0536154	-3.40226	0.000668304	0.00441202	Itpk1	protein_coding
ENSMUSG00000033545	6463.38	6025.94	6900.81	-0.191451	0.0555875	-3.40101	0.00067138	0.00442923	Znrf1	protein_coding
ENSMUSG00000059456	7534.08	8242.65	6825.52	0.27888	0.0843579	3.40044	0.000672767	0.00443683	Ptk2b	protein_coding
ENSMUSG00000042613	2133.33	1933.19	2333.46	-0.25541	0.0730236	-3.39652	0.000682497	0.00449943	Pbxip1	protein_coding
ENSMUSG00000018651	1666.67	1796.39	1536.95	0.218385	0.0632929	3.3963	0.000683028	0.00450137	Tada2a	protein_coding
ENSMUSG00000007877	148.045	179.241	116.849	0.512869	0.148111	3.39584	0.000684195	0.00450435	Tcap	protein_coding
ENSMUSG00000032869	1533.28	1658.73	1407.83	0.222259	0.0636058	3.39587	0.000684108	0.00450435	Psmf1	protein_coding
ENSMUSG00000053094	1835.14	1999.32	1670.97	0.247584	0.0714545	3.39414	0.000688457	0.00453082	Tmem248	protein_coding
ENSMUSG00000025358	302.718	263.317	342.118	-0.348456	0.0992625	-3.39366	0.000689661	0.00453717	Cdk2	protein_coding
ENSMUSG00000022536	11160.4	11839.4	10481.3	0.169811	0.0493204	3.39324	0.000690699	0.00454241	Glyr1	protein_coding
ENSMUSG00000035235	294.506	257.143	331.869	-0.347532	0.101443	-3.39278	0.000691877	0.00454858	Trim13	protein_coding
ENSMUSG00000031231	5335.56	4860.31	5810.8	-0.260393	0.0773866	-3.3925	0.000692579	0.00455161	Cox7b	protein_coding
ENSMUSG00000038022	347.699	393.87	301.528	0.35188	0.0982732	3.39201	0.000693829	0.00455824	Mindy4	protein_coding
ENSMUSG00000066456	3450.98	3172.35	3729.61	-0.222917	0.0642596	-3.39102	0.000696338	0.00457154	Hmgn3	protein_coding
ENSMUSG00000006021	1227.26	1393	1061.52	0.341118	0.0908383	3.3899	0.000699171	0.00458855	Kptn	protein_coding
ENSMUSG00000022685	1392.62	1509.08	1276.15	0.221523	0.0628638	3.38899	0.000701504	0.00460227	Parn	protein_coding
ENSMUSG00000043207	1492.62	1610.11	1375.12	0.22706	0.0667095	3.38794	0.000704207	0.00461519	Zmpste24	protein_coding
ENSMUSG00000055489	222.486	269.818	175.154	0.517772	0.144215	3.38796	0.000704147	0.00461519	Ano5	protein_coding
ENSMUSG00000001632	1494.38	1614.74	1374.01	0.229031	0.066812	3.3868	0.000707124	0.0046327	Brpf1	protein_coding
ENSMUSG00000041889	3086.39	2769.86	3402.91	-0.273883	0.0775566	-3.38622	0.000708617	0.00464088	Shisa4	protein_coding
ENSMUSG00000020137	1040.88	948.931	1132.83	-0.244714	0.0707506	-3.3851	0.000711532	0.00465674	Thap2	protein_coding
ENSMUSG00000002265	14731.5	13048.4	16414.6	-0.310044	0.0891086	-3.38461	0.000712787	0.00466173	Peg3	protein_coding
ENSMUSG00000034932	880.948	981.709	780.188	0.296991	0.0822148	3.38402	0.000714337	0.00466807	Mrpl54	protein_coding
ENSMUSG00000027304	4584.69	4947.05	4222.34	0.226418	0.0663611	3.38374	0.000715047	0.00467004	Rtf1	protein_coding
ENSMUSG00000032067	1301.94	1464.47	1139.41	0.338346	0.0987096	3.38346	0.000715774	0.00467317	Pts	protein_coding
ENSMUSG00000000276	3453.12	3758.93	3147.3	0.24304	0.0699101	3.38313	0.000716656	0.00467732	Dgke	protein_coding
ENSMUSG00000021591	966.217	878.219	1054.21	-0.260937	0.076746	-3.383	0.000716996	0.00467793	Glrx	protein_coding
ENSMUSG00000023972	771.997	846.523	697.47	0.27122	0.0785562	3.38277	0.000717587	0.00468016	Ptk7	protein_coding
ENSMUSG00000021339	4590.4	4896.11	4284.7	0.180336	0.0521198	3.38196	0.000719712	0.00469079	Mrs2	protein_coding
ENSMUSG00000025815	476.717	540.994	412.44	0.360571	0.101716	3.38174	0.000720288	0.00469292	Dhtkd1	protein_coding
ENSMUSG00000026727	1238.02	1142.18	1333.85	-0.217425	0.063248	-3.38013	0.000724523	0.00471888	Rsu1	protein_coding
ENSMUSG00000042476	230.138	268.602	191.673	0.423074	0.117239	3.37872	0.000728233	0.00473979	Abcb4	protein_coding
ENSMUSG00000035692	28.3767	38.9409	17.8124	0.613307	0.191762	3.37779	0.000730715	0.00475267	Isg15	protein_coding
ENSMUSG00000026393	1708.19	1895.28	1521.09	0.284886	0.0795061	3.37724	0.000732166	0.00476047	Nek7	protein_coding
ENSMUSG00000028550	1737.21	1895.58	1578.84	0.25069	0.0726167	3.37431	0.000740023	0.00480659	Atg4c	protein_coding
ENSMUSG00000035285	1805.71	2052.8	1558.62	0.368068	0.107717	3.37408	0.000740633	0.0048089	Nat14	protein_coding
ENSMUSG00000029713	10165.4	9231.28	11099.6	-0.257482	0.075239	-3.37347	0.000742269	0.00481787	Gnb2	protein_coding
ENSMUSG00000004071	5937.77	6363.11	5512.42	0.210279	0.062371	3.37136	0.00074797	0.00484987	Cdip1	protein_coding
ENSMUSG00000079445	84.1058	65.2918	102.92	-0.519074	0.156145	-3.37122	0.000748367	0.00485078	B3gnt7	protein_coding
ENSMUSG00000033633	45.3009	60.4661	30.1358	0.656879	0.181013	3.36944	0.000753209	0.00487548	Clec18a	protein_coding
ENSMUSG00000043587	466.297	518.663	413.931	0.31151	0.0916455	3.3695	0.000753057	0.00487548	Pxylp1	protein_coding
ENSMUSG00000073542	367.909	411.551	324.266	0.3263	0.0957016	3.36686	0.000760286	0.0049196	Cep76	protein_coding
ENSMUSG00000030225	346.577	300.797	392.356	-0.352965	0.101992	-3.36567	0.000763574	0.0049339	Dera	protein_coding
ENSMUSG00000001441	6654.54	6183.13	7125.96	-0.188915	0.0545947	-3.36297	0.000771099	0.00497594	Npepps	protein_coding
ENSMUSG00000007039	711.84	605.686	817.995	-0.392482	0.115287	-3.36115	0.0007762	0.00500373	Ddah2	protein_coding
ENSMUSG00000024989	84.2912	63.1015	105.481	-0.572678	0.159456	-3.3608	0.000777166	0.00500826	Cep55	protein_coding
ENSMUSG00000022214	3378.43	3597.43	3159.43	0.180124	0.0526836	3.36014	0.000779024	0.00501852	Dcaf11	protein_coding
ENSMUSG00000020770	1171.84	1260.78	1082.9	0.232544	0.0709229	3.35968	0.000780314	0.00502169	Unk	protein_coding
ENSMUSG00000000078	4019.39	3702.68	4336.1	-0.226875	0.0671601	-3.35899	0.000782275	0.0050326	Klf6	protein_coding
ENSMUSG00000033161	31413.7	34553.2	28274.3	0.294033	0.0908308	3.35794	0.000785254	0.00505005	Atp1a1	protein_coding
ENSMUSG00000011158	1764.59	1894.65	1634.52	0.212263	0.0627149	3.35774	0.000785821	0.00505197	Brf1	protein_coding
ENSMUSG00000019518	1012.39	899.066	1125.71	-0.29813	0.085356	-3.35606	0.000790618	0.00507591	Ap4m1	protein_coding
ENSMUSG00000020829	287.078	326.125	248.03	0.361658	0.105576	3.35526	0.000792917	0.0050867	Slc46a1	protein_coding
ENSMUSG00000057706	1169.93	1067.13	1272.73	-0.246493	0.0724544	-3.35508	0.000793419	0.00508698	Mex3b	protein_coding
ENSMUSG00000021589	1366.46	1244.48	1488.44	-0.257438	0.0769194	-3.35435	0.000795526	0.00509876	Rhobtb3	protein_coding
ENSMUSG00000004936	5783.08	6195.53	5370.63	0.208804	0.0622263	3.35366	0.000797504	0.00510797	Map2k1	protein_coding
ENSMUSG00000017548	1969.41	2122.69	1816.14	0.221797	0.0653753	3.35193	0.000802507	0.00513827	Suz12	protein_coding
ENSMUSG00000022305	2530.01	2740.74	2319.27	0.222612	0.0641409	3.35115	0.000804773	0.00515104	Lrp12	protein_coding
ENSMUSG00000028549	279.344	319.738	238.949	0.385411	0.111345	3.35011	0.000807785	0.00516682	Itgb3bp	protein_coding
ENSMUSG00000036026	7013.66	6464.33	7562.99	-0.213427	0.0620768	-3.34978	0.000808772	0.00517138	Tmem63b	protein_coding
ENSMUSG00000038235	316.929	275.966	357.892	-0.351157	0.106199	-3.34825	0.000813243	0.00519645	F11r	protein_coding
ENSMUSG00000025283	1253.16	1123.19	1383.13	-0.293882	0.088048	-3.3473	0.000816042	0.00521076	Sat1	protein_coding
ENSMUSG00000040865	2389.47	2578.03	2200.91	0.218434	0.0639795	3.3442	0.000825189	0.00526567	Ino80d	protein_coding
ENSMUSG00000031698	66.3815	86.8287	45.9343	0.662411	0.169281	3.34289	0.000829116	0.00528537	Mylk3	protein_coding
ENSMUSG00000028261	1483.29	1349.33	1617.26	-0.260861	0.0780756	-3.34268	0.000829743	0.00528758	Ndufaf4	protein_coding
ENSMUSG00000036955	6039.04	6504.97	5573.11	0.219774	0.0651536	3.34215	0.00083132	0.00529585	Kif1bp	protein_coding
ENSMUSG00000022244	286.078	330.152	242.004	0.396981	0.113174	3.342	0.000831772	0.00529694	Amacr	protein_coding
ENSMUSG00000028931	5421.9	5946.93	4896.88	0.281646	0.0860545	3.34141	0.000833551	0.00530648	Kcnab2	protein_coding
ENSMUSG00000005907	1347.71	1459.38	1236.03	0.231685	0.0682835	3.34041	0.000836557	0.00531981	Pex1	protein_coding
ENSMUSG00000040731	13650.8	14509	12792.6	0.186194	0.0556764	3.34034	0.00083677	0.00531981	Eif4h	protein_coding
ENSMUSG00000017724	668.101	597.025	739.177	-0.283657	0.0812659	-3.3398	0.000838373	0.00532462	Etv4	protein_coding
ENSMUSG00000020149	10771.3	10145.6	11397.1	-0.169168	0.0503706	-3.33953	0.000839189	0.00532688	Rab1a	protein_coding
ENSMUSG00000078201	241.989	281.066	202.913	0.4139	0.11478	3.3395	0.000839292	0.00532688	Tmem203	protein_coding
ENSMUSG00000055302	4260.64	4561.05	3960.23	0.194877	0.0571974	3.33787	0.000844238	0.00535288	Mrfap1	protein_coding
ENSMUSG00000032537	2351.04	2175.17	2526.92	-0.218638	0.0652905	-3.33744	0.000845551	0.00535761	Ephb1	protein_coding
ENSMUSG00000061607	1141.5	1040.38	1242.62	-0.24456	0.0715383	-3.33749	0.000845398	0.00535761	Mdc1	protein_coding
ENSMUSG00000020640	3705.92	3457.89	3953.96	-0.188382	0.055609	-3.33734	0.000845858	0.00535776	Itsn2	protein_coding
ENSMUSG00000028656	8453.12	7789.31	9116.92	-0.215755	0.0631262	-3.33707	0.00084668	0.00536117	Cap1	protein_coding
ENSMUSG00000058290	110.753	85.3981	136.107	-0.539344	0.149202	-3.33678	0.000847559	0.00536494	Espl1	protein_coding
ENSMUSG00000020436	6759.39	6278.13	7240.65	-0.202271	0.0598646	-3.33665	0.000847936	0.00536553	Gabrg2	protein_coding
ENSMUSG00000024944	1245.53	1361.67	1129.4	0.25094	0.0725797	3.33564	0.000851045	0.00537942	Arl2	protein_coding
ENSMUSG00000028886	2031.48	2186.66	1876.3	0.216878	0.0643722	3.33549	0.000851494	0.00537942	Eya3	protein_coding
ENSMUSG00000047003	863.749	774.692	952.807	-0.29237	0.0884795	-3.33497	0.000853085	0.00538729	Zfp41	protein_coding
ENSMUSG00000034088	9423.26	10128.4	8718.1	0.21928	0.065816	3.33483	0.000853525	0.00538827	Hdlbp	protein_coding
ENSMUSG00000030208	255.789	210.993	300.585	-0.442766	0.125238	-3.33298	0.000859225	0.00542063	Emp1	protein_coding
ENSMUSG00000013973	1062.7	965.469	1159.94	-0.240638	0.068661	-3.33195	0.000862396	0.00543701	Dedd	protein_coding
ENSMUSG00000022010	14805.9	14019.1	15592.6	-0.152079	0.0452572	-3.332	0.000862242	0.00543701	Tsc22d1	protein_coding
ENSMUSG00000040877	265.572	300.864	230.28	0.357885	0.104588	3.3317	0.000863172	0.00544008	Wdr25	protein_coding
ENSMUSG00000033543	1729.53	1891.2	1567.85	0.252751	0.0731425	3.33149	0.000863837	0.00544246	Gtf2a2	protein_coding
ENSMUSG00000029017	1995.41	2172.9	1817.92	0.241744	0.0705397	3.33123	0.000864631	0.00544565	Pmpcb	protein_coding
ENSMUSG00000046519	954.209	1037.29	871.126	0.244674	0.0723396	3.33003	0.000868352	0.00546726	Golph3l	protein_coding
ENSMUSG00000025558	13233.4	12132.9	14333.8	-0.230851	0.0679483	-3.3299	0.000868767	0.00546805	Dock9	protein_coding
ENSMUSG00000027428	1341.16	1486.87	1195.45	0.29105	0.0840277	3.32919	0.00087098	0.00548016	Rbbp9	protein_coding
ENSMUSG00000061559	1545.62	1677.25	1413.98	0.23496	0.0689899	3.32823	0.000873993	0.00549729	Wdr61	protein_coding
ENSMUSG00000030189	2666.56	2450.63	2882.48	-0.222461	0.0652554	-3.32783	0.00087526	0.00550343	Ybx3	protein_coding
ENSMUSG00000042215	740.862	815.016	666.709	0.269781	0.0774712	3.32606	0.000880831	0.00553293	Bag2	protein_coding
ENSMUSG00000028671	619.781	551.233	688.33	-0.304424	0.0908044	-3.32471	0.000885091	0.00555415	Gale	protein_coding
ENSMUSG00000063897	430.771	496.264	365.279	0.399695	0.115997	3.3249	0.000884517	0.00555415	Dhrsx	protein_coding
ENSMUSG00000063882	5363.98	4936.79	5791.18	-0.232006	0.0697989	-3.32403	0.000887274	0.00556416	Uqcrh	protein_coding
ENSMUSG00000040455	2154.06	2361.15	1946.97	0.270042	0.0805518	3.32382	0.000887927	0.00556456	Usp45	protein_coding
ENSMUSG00000037286	2902.04	3084.56	2719.52	0.184359	0.0552627	3.32362	0.000888561	0.00556668	Stag1	protein_coding
ENSMUSG00000051427	1457.73	1573.04	1342.43	0.227911	0.0680601	3.32128	0.000896061	0.00561181	Ccdc157	protein_coding
ENSMUSG00000028416	4205.96	3885.61	4526.31	-0.225925	0.0684857	-3.31979	0.000900846	0.00563804	Bag1	protein_coding
ENSMUSG00000000001	3044.98	2791.83	3298.14	-0.237429	0.0710429	-3.31956	0.000901598	0.00564088	Gnai3	protein_coding
ENSMUSG00000058886	7569.1	8154.99	6983.22	0.199575	0.0576431	3.31757	0.000908047	0.00567747	Deaf1	protein_coding
ENSMUSG00000041187	280.88	240.921	320.84	-0.38085	0.121342	-3.31706	0.000909701	0.00568405	Prkd2	protein_coding
ENSMUSG00000021189	1564.26	1440.64	1687.88	-0.225012	0.067169	-3.3165	0.000911523	0.00569355	Atxn3	protein_coding
ENSMUSG00000026988	443.548	498.852	388.244	0.335327	0.0998144	3.31558	0.000914546	0.00570866	Wdsub1	protein_coding
ENSMUSG00000031631	1065.44	1160.89	969.987	0.252399	0.0750835	3.31342	0.000921629	0.00574718	Cfap97	protein_coding
ENSMUSG00000019087	11855.7	11026.2	12685.1	-0.188577	0.0554581	-3.3129	0.000923334	0.00575402	Atp6ap1	protein_coding
ENSMUSG00000033565	15679.5	14729.3	16629.8	-0.172878	0.0516824	-3.31187	0.000926746	0.00577338	Rbfox2	protein_coding
ENSMUSG00000024900	1518.58	1390.49	1646.66	-0.23305	0.0689187	-3.31049	0.000931327	0.00579237	Cpt1a	protein_coding
ENSMUSG00000023999	88.7205	109.815	67.6257	0.541421	0.158843	3.31038	0.000931704	0.00579281	Kif6	protein_coding
ENSMUSG00000005718	96.2518	73.4334	119.07	-0.544716	0.154114	-3.30942	0.000934907	0.0058089	Tfap4	protein_coding
ENSMUSG00000027434	295.583	256.384	334.782	-0.359878	0.107409	-3.30894	0.000936507	0.00581311	Nkx2-2	protein_coding
ENSMUSG00000043621	102.94	125.923	79.9569	0.53217	0.146889	3.30894	0.000936491	0.00581311	Ubxn10	protein_coding
ENSMUSG00000026439	1614.37	1738.87	1489.87	0.215339	0.0640447	3.30813	0.0009392	0.00582791	Rbbp5	protein_coding
ENSMUSG00000026965	2378.08	2172.43	2583.73	-0.235422	0.0692402	-3.30465	0.000950964	0.0058951	Anapc2	protein_coding
ENSMUSG00000022515	1586.57	1700.08	1473.05	0.204137	0.0611372	3.30411	0.00095277	0.00590243	Anks3	protein_coding
ENSMUSG00000062785	3200.17	3507.47	2892.88	0.282208	0.0881081	3.3033	0.000955549	0.00591771	Kcnc3	protein_coding
ENSMUSG00000013275	2992.33	3218.62	2766.04	0.226066	0.0692902	3.30285	0.000957068	0.00592517	Slc41a1	protein_coding
ENSMUSG00000023236	8431.38	9184.08	7678.67	0.241021	0.0706416	3.30211	0.000959609	0.00593507	Scg5	protein_coding
ENSMUSG00000034723	9093.27	9716.74	8469.81	0.192653	0.0574975	3.3019	0.000960326	0.00593562	Tmx4	protein_coding
ENSMUSG00000031860	460.441	516.529	404.354	0.322781	0.0928364	3.29971	0.000967845	0.00597818	Pbx4	protein_coding
ENSMUSG00000046378	512.661	436.69	588.633	-0.38169	0.109184	-3.29928	0.000969341	0.00598547	Asphd1	protein_coding
ENSMUSG00000029165	1031.44	1136.98	925.902	0.283931	0.0842054	3.29785	0.000974269	0.00601197	Agbl5	protein_coding
ENSMUSG00000037185	33.6615	44.1441	23.1789	0.580046	0.186585	3.2969	0.00097759	0.00602852	Krt80	protein_coding
ENSMUSG00000024480	980.736	882.196	1079.28	-0.273546	0.0804861	-3.29652	0.00097891	0.00603469	Ap3s1	protein_coding
ENSMUSG00000029056	1419.37	1537.87	1300.86	0.234049	0.0699818	3.29638	0.000979379	0.00603562	Pank4	protein_coding
ENSMUSG00000048351	857.11	783.677	930.543	-0.23787	0.0706513	-3.29495	0.000984386	0.00606252	Coa7	protein_coding
ENSMUSG00000004562	1302.42	1166.99	1437.84	-0.28619	0.0854309	-3.29464	0.000985472	0.00606723	Arhgef40	protein_coding
ENSMUSG00000030557	9613.79	8952.4	10275.2	-0.197321	0.0593447	-3.29391	0.000988047	0.0060811	Mef2a	protein_coding
ENSMUSG00000030691	3299.8	3022.04	3577.56	-0.232547	0.0691044	-3.29315	0.000990713	0.00609553	Fchsd2	protein_coding
ENSMUSG00000032612	5217.84	5533.16	4902.51	0.176573	0.0533687	3.293	0.00099125	0.00609685	Usp4	protein_coding
ENSMUSG00000072501	6538.23	7028.3	6048.16	0.211779	0.0634153	3.29214	0.000994278	0.00611149	Phf20l1	protein_coding
ENSMUSG00000021244	6871.11	7460.6	6281.62	0.247434	0.0751482	3.29196	0.000994904	0.00611335	Ylpm1	protein_coding
ENSMUSG00000046280	190.089	158.211	221.967	-0.422885	0.118241	-3.29142	0.000996843	0.00612328	She	protein_coding
ENSMUSG00000071415	1890.02	1709.71	2070.34	-0.269701	0.0814667	-3.2913	0.000997243	0.00612374	Rpl23	protein_coding
ENSMUSG00000024965	168.832	143.424	194.24	-0.39564	0.120727	-3.2907	0.000999377	0.00613486	Fermt3	protein_coding
ENSMUSG00000044350	170.523	203.633	137.414	0.483176	0.139253	3.28974	0.00100282	0.00615213	Lacc1	protein_coding
ENSMUSG00000058444	1248.68	1338.59	1158.78	0.211201	0.0642295	3.28941	0.00100396	0.006157	Map2k5	protein_coding
[truncated: 1,235 more rows]

## Sheet: C-Significant Sp1 targets str
		baseMean	MUT.Mean	CTRL.Mean	log2FoldChange	lfcSE	stat	pvalue	padj	symbol	biotype
	ENSMUSG00000027500	35596.4	24464.3	46728.4	-0.945601	0.077	-11.7692	5.62264e-32	1.66318e-28	Stmn2	protein_coding
	ENSMUSG00000047261	22136.7	16633.4	27640	-0.728737	0.0604382	-11.6438	2.4681e-31	6.2577e-28	Gap43	protein_coding
	ENSMUSG00000024769	537.936	729.41	346.461	1.03407	0.0884392	10.9797	4.7868e-28	9.43956e-25	Cdc42bpg	protein_coding
	ENSMUSG00000079523	2327.6	1551.48	3103.72	-1.02205	0.0897147	-10.9449	7.03104e-28	1.24787e-24	Tmsb10	protein_coding
	ENSMUSG00000060600	472.991	639.225	306.756	1.03846	0.0920242	10.678	1.2896e-26	1.90732e-23	Eno3	protein_coding
	ENSMUSG00000005682	2086.16	2570.41	1601.91	0.668137	0.0628256	10.2313	1.43582e-24	1.9059e-21	Pan2	protein_coding
	ENSMUSG00000021196	18770.8	13722	23819.6	-0.813286	0.0779937	-10.0452	9.64053e-24	1.14067e-20	Pfkp	protein_coding
	ENSMUSG00000062380	17174.8	11466.7	22882.9	-0.976907	0.0920857	-10.0375	1.04245e-23	1.15634e-20	Tubb3	protein_coding
	ENSMUSG00000073433	2463.34	1617.66	3309.03	-1.03424	0.099575	-9.90211	4.07599e-23	3.80741e-20	Arhgdig	protein_coding
	ENSMUSG00000048920	2413.91	2934.27	1893.56	0.649139	0.0639398	9.85245	6.68942e-23	5.65352e-20	Fkrp	protein_coding
	ENSMUSG00000025950	4571.5	3574.34	5568.65	-0.669518	0.0668403	-9.73635	2.10996e-22	1.70216e-19	Idh1	protein_coding
	ENSMUSG00000093930	27415.5	20479.3	34351.8	-0.744472	0.073678	-9.67747	3.75895e-22	2.9006e-19	Hmgcs1	protein_coding
	ENSMUSG00000070348	2263	1735.1	2790.91	-0.657184	0.0652572	-9.61837	6.68843e-22	4.94609e-19	Ccnd1	protein_coding
	ENSMUSG00000019370	56253.7	46405.7	66101.7	-0.541429	0.0551838	-9.60663	7.4959e-22	5.32149e-19	Calm3	protein_coding
	ENSMUSG00000027397	4714.55	3744.43	5684.67	-0.605238	0.0611695	-9.57618	1.00705e-21	6.87428e-19	Slc20a1	protein_coding
	ENSMUSG00000036246	911.867	679.403	1144.33	-0.759107	0.0771613	-9.44915	3.41595e-21	2.16522e-18	Gmip	protein_coding
	ENSMUSG00000035279	294.072	404.333	183.81	1.07324	0.105603	9.41827	4.58596e-21	2.71306e-18	Ssc5d	protein_coding
	ENSMUSG00000027009	862.518	576.06	1148.98	-0.929732	0.0921629	-9.32052	1.15768e-20	6.18829e-18	Itga4	protein_coding
	ENSMUSG00000000489	907.654	606.847	1208.46	-0.938925	0.0943348	-9.2423	2.41248e-20	1.22334e-17	Pdgfb	protein_coding
	ENSMUSG00000026688	2953.64	2290.78	3616.49	-0.713436	0.0759467	-9.18168	4.24417e-20	2.01463e-17	Mgst3	protein_coding
	ENSMUSG00000031604	4168.63	3243.35	5093.91	-0.658163	0.0690177	-9.17994	4.3135e-20	2.01463e-17	Msmo1	protein_coding
	ENSMUSG00000038065	7162.36	4924.61	9400.12	-0.92293	0.0947939	-9.17107	4.68357e-20	2.08122e-17	Mturn	protein_coding
	ENSMUSG00000029032	172.17	253.604	90.7361	1.33352	0.134137	9.14788	5.80639e-20	2.51346e-17	Arhgef16	protein_coding
	ENSMUSG00000031328	7764.2	5652.83	9875.57	-0.849608	0.0918816	-9.01061	2.04909e-19	8.3826e-17	Flna	protein_coding
	ENSMUSG00000003872	801.752	549.39	1054.11	-0.938217	0.0993689	-8.97706	2.78088e-19	1.07445e-16	Lin7b	protein_coding
	ENSMUSG00000028832	1095.27	828.224	1362.32	-0.732905	0.0785373	-8.97691	2.7848e-19	1.07445e-16	Stmn1	protein_coding
	ENSMUSG00000020635	1666.62	1310.07	2023.16	-0.658785	0.0719213	-8.89265	5.96671e-19	2.20619e-16	Fkbp1b	protein_coding
	ENSMUSG00000071658	6447.94	5058.18	7837.69	-0.63644	0.0692108	-8.85498	8.37022e-19	3.03173e-16	Gng3	protein_coding
	ENSMUSG00000015942	1002.9	1245.91	759.886	0.708072	0.0765088	8.84185	9.4149e-19	3.34191e-16	Gtf2ird2	protein_coding
[truncated: 2,686 more rows]

## Sheet: D-Significant Sp1 tg ctx-str
x	baseMean	log2FoldChange	lfcSE	stat	pvalue	padj	symbol	biotype				baseMean	log2FoldChange	lfcSE	stat	pvalue	padj	symbol	biotype
[truncated: 1,779 more rows]

[truncated: 6 more sheets: E-KEGG-Sp1tg ctx-str, F-GO-Sp1tg-ctx-str, G-Sp1 ChIP-seq aNSCs, H-Sp1 targets Sp1 ChIP-seq, I-Sp1 ChIP-seq - RNAseq, JSp1 targets - ChIPseq - RNAseq]
