# Supplementary material for: HAT cofactor TRRAP modulates microtubule dynamics via SP1 signaling to prevent neurodegeneration
Source: eLife. 2021 Feb 17;10:e61531. doi: 10.7554/eLife.61531 (PMC7939550; doi:10.7554/eLife.61531)
Supplement: Supplementary file 5. — (A) The list includes the results of AcH3 ChIP-seq of aNSCs. The 10% most depleted regions in Trrap-Δ versus control aNSCs for AcH3 are summarized. (B) The list includes the results of the AcH4 ChIP-seq of aNSCs. The 10% most depleted regions in Trrap-Δ versus control aNSCs for AcH4 are summarized. (C) The overlaps between the genes mapped in (A) and (B). (D) The overlaps between the DEGs in D and the genes mapped in (A). (E) The overlaps between the DEGs in D and the genes mapped in (B). (F) The overlaps between the DEGs in D and the genes mapped in (C). (G) A combined list from (D) and (E) was created and compared with the list of Sp1 targets in Supplementary file 4A. The list contains genes where the acetylation of H3 or H4 was decreased, whose expression was altered after Trrap deletion and which are reported Sp1 targets. [file elife-61531-supp5.xlsx]

## Sheet: A-AcH3 depleted peaks
chr	start	end	WT	KO	lfc	NearestTSS	DistnaceToTSS	GeneName
chr11	103631957	103632627	1.01909	0.518486	-0.974911	ENSMUST00000000127	-2837	Wnt3
chr3	90401649	90402571	1.50182	0.691314	-1.1193	ENSMUST00000001047	-1566	S100a3
chr12	32243592	32245000	2.1991	1.38263	-0.669498	ENSMUST00000001253	0	Slc26a4
chr2	164594768	164597342	14.4282	9.24633	-0.641942	ENSMUST00000001439	0	Ube2c
chr11	69710548	69710931	0.750912	0.0864143	-3.1193	ENSMUST00000001631	-1508	Acap1
chr11	106072174	106072720	0.804548	0.259243	-1.63387	ENSMUST00000002043	4939	Ccdc47
chr17	33975761	33976363	1.18	0.6049	-0.964023	ENSMUST00000002379	-3673	Cd320
chr8	4280557	4281051	0.804548	0.345657	-1.21884	ENSMUST00000003029	-4645	Timm44
chr8	74740752	74741391	1.07273	0.345657	-1.63387	ENSMUST00000003123	-2238	Fam32a
chr13	19044438	19045810	2.46728	1.29621	-0.928618	ENSMUST00000003345	4200	Amph
chr7	25680935	25681574	0.858185	0.432071	-0.990018	ENSMUST00000003469	-826	Cd79a
chr9	21854304	21856840	10.2446	5.35769	-0.935179	ENSMUST00000003501	0	Elavl3
chr17	28745456	28746188	1.18	0.432071	-1.44945	ENSMUST00000004987	-1343	Srpk1
chr10	78185998	78186671	1.01909	0.518486	-0.974911	ENSMUST00000005488	-4961	Casp14
chr1	74837503	74838259	1.12637	0.691314	-0.704264	ENSMUST00000006718	0	Wnt10a
chr7	117007997	117009927	4.13001	2.67884	-0.624537	ENSMUST00000007423	0	Scube2
chr18	68496175	68498020	6.27548	3.28374	-0.934384	ENSMUST00000007624	0	Mc5r
chr7	71073786	71074617	1.39455	0.345657	-2.01239	ENSMUST00000008043	-4031	Klf13
chr19	4710043	4710628	1.01909	0.172829	-2.55987	ENSMUST00000008991	-580	Spnb3
chrX	20522587	20523945	2.41364	1.2098	-0.996445	ENSMUST00000009550	3790	Elk1
chr3	105674388	105675664	2.25273	0.950557	-1.24483	ENSMUST00000010279	565	Adora3
chr9	20875310	20876076	1.12637	0.691314	-0.704264	ENSMUST00000010348	1883	Fdx1l
chr12	112720745	112721550	1.34091	0.6049	-1.14845	ENSMUST00000010673	2485	Gm266
chr7	90943174	90944051	1.34091	0.777729	-0.785878	ENSMUST00000011298	0	1700026D08Rik
chr5	136298096	136298769	1.12637	0.432071	-1.38234	ENSMUST00000013615	4122	Srrm3
chr17	12575586	12576335	1.18	0.0864143	-3.77138	ENSMUST00000014578	4113	Plg
chr17	34757858	34758416	1.12637	0.432071	-1.38234	ENSMUST00000015611	-4943	Egfl8
chr15	83356213	83357859	2.57455	1.64187	-0.648981	ENSMUST00000016902	0	Bik
chr2	160561844	160562606	1.01909	0.259243	-1.97491	ENSMUST00000017077	-4117	Plcg1
chr8	124903489	124904093	1.18	0.691314	-0.771378	ENSMUST00000017622	2975	Zc3h18
chr2	164655300	164656167	1.44819	0.777729	-0.896909	ENSMUST00000017911	-1264	1700020C07Rik
chr5	120120953	120122147	2.14546	0.259243	-3.04891	ENSMUST00000018748	0	Tbx3
chr11	35587590	35588518	1.50182	0.6049	-1.31195	ENSMUST00000018990	4606	Pank3
chr11	70259979	70260712	1.12637	0.432071	-1.38234	ENSMUST00000019067	-4709	Med11
chr5	137434536	137435573	1.50182	0.777729	-0.949376	ENSMUST00000019198	-2374	Fis1
chr11	100960116	100961653	2.14546	0.950557	-1.17444	ENSMUST00000019447	-3367	Psmc3ip
chr10	30325062	30325819	1.07273	0.6049	-0.82652	ENSMUST00000019927	-4508	Trmt11
chr10	39972045	39972491	0.804548	0.432071	-0.896909	ENSMUST00000019982	4981	Gtf3c6
chr10	93658857	93659541	1.07273	0.518486	-1.04891	ENSMUST00000020209	-2159	Ndufa12
chr10	61916453	61917415	1.39455	0.864143	-0.690458	ENSMUST00000020273	-3968	Supv3l1
chr10	61888213	61888890	0.965458	0.518486	-0.896909	ENSMUST00000020277	-2975	Hkdc1
chr10	60841059	60841733	1.23364	0.6049	-1.02815	ENSMUST00000020289	4539	X99384
chr10	114748376	114749007	1.07273	0.518486	-1.04891	ENSMUST00000020343	3641	Rab21
chr10	79683997	79684731	1.23364	0.6049	-1.02815	ENSMUST00000020365	-4448	Mum1
chr11	55021470	55022948	2.30637	1.46904	-0.650748	ENSMUST00000020499	3594	Slc36a1
chr10	79239196	79239696	0.804548	0.259243	-1.63387	ENSMUST00000020575	-321	Fstl3
chr11	50135221	50135852	0.965458	0.432071	-1.15994	ENSMUST00000020637	3324	Canx
chr12	14153325	14153899	0.858185	0.432071	-0.990018	ENSMUST00000020926	4946	Fam84a
chr12	3314815	3315531	1.12637	0.518486	-1.1193	ENSMUST00000021001	-4847	Rab10
chr11	104982210	104983320	1.50182	0.950557	-0.65987	ENSMUST00000021030	-4419	Mettl2
chr11	96888924	96890003	2.03819	0.432071	-2.23795	ENSMUST00000021249	-1249	Scrn2
chr11	102697099	102697618	0.858185	0.345657	-1.31195	ENSMUST00000021302	0	Higd1b
chr12	53110216	53112112	9.81549	5.78976	-0.761557	ENSMUST00000021339	-2729	6530401N04Rik
chr12	56595424	56596233	1.39455	0.6049	-1.20503	ENSMUST00000021413	-1791	Nfkbia
chr12	80393743	80394620	1.39455	0.518486	-1.42742	ENSMUST00000021547	2650	Zfyve26
chr12	112122330	112122968	0.965458	0.345657	-1.48187	ENSMUST00000021705	4340	Cinp
chr13	41107600	41108956	1.93092	0.691314	-1.48187	ENSMUST00000021790	-2663	Tmem14c
chr13	49519191	49519954	1.07273	0.518486	-1.04891	ENSMUST00000021817	2513	Ippk
chr13	55819156	55819775	0.911821	0.172829	-2.39941	ENSMUST00000021959	3147	Txndc15
chr13	69136485	69139178	13.8382	6.91314	-1.00125	ENSMUST00000022013	0	Adcy2
chr13	73470011	73471030	1.44819	0.691314	-1.06683	ENSMUST00000022098	1556	Mrpl36
chr13	89681707	89682490	1.23364	0.518486	-1.25055	ENSMUST00000022108	1468	Hapln1
chr13	100670148	100671206	1.34091	0.864143	-0.633875	ENSMUST00000022150	0	Cartpt
chr13	96249439	96250104	0.965458	0.259243	-1.89691	ENSMUST00000022186	-830	S100z
chr13	95131518	95132211	1.01909	0.518486	-0.974911	ENSMUST00000022196	2605	Ap3b1
chr13	105021170	105021924	1.12637	0.691314	-0.704264	ENSMUST00000022227	1704	Cenpk
chr14	37910812	37911926	2.09183	1.29621	-0.690458	ENSMUST00000022337	0	Cdhr1
chr14	51711427	51712718	2.03819	1.29621	-0.652983	ENSMUST00000022428	677	Rnase4
chr14	62944882	62947738	5.84638	3.80223	-0.620699	ENSMUST00000022499	-3167	Rnaseh2b
chr14	75134068	75135031	1.23364	0.6049	-1.02815	ENSMUST00000022573	1918	Esd
chr14	79695577	79701822	34.8101	21.7764	-0.676741	ENSMUST00000022595	0	1190002H23Rik
chr14	70007475	70008051	0.804548	0.518486	-0.633875	ENSMUST00000022660	-927	Loxl2
chr14	71044832	71046174	2.1991	1.03697	-1.08454	ENSMUST00000022697	-2758	Fgf17
chr14	73913227	73913872	0.965458	0.345657	-1.48187	ENSMUST00000022705	3373	Med4
chr15	3933452	3934457	1.44819	0.432071	-1.74491	ENSMUST00000022791	-3880	Fbxo4
chr15	10882076	10882990	1.50182	0.518486	-1.53434	ENSMUST00000022853	0	C1qtnf3
chr15	37355921	37356710	1.44819	0.691314	-1.06683	ENSMUST00000022897	614	4930447A16Rik
chr15	79638024	79638721	1.18	0.518486	-1.18642	ENSMUST00000023057	-2829	Nptxr
chr16	13782367	13782866	0.804548	0.259243	-1.63387	ENSMUST00000023363	1577	Rrn3
chr16	44149025	44149907	1.66273	1.03697	-0.68118	ENSMUST00000023382	4021	Naa50
chrX	20124661	20125774	2.7891	1.2098	-1.20503	ENSMUST00000023832	-1139	Rgn
chr14	8916942	8917596	1.12637	0.345657	-1.70426	ENSMUST00000023924	4117	Rpp14
chr15	98885569	98886555	1.77001	1.03697	-0.771378	ENSMUST00000024249	0	Prph
chr17	46294263	46295051	1.07273	0.6049	-0.82652	ENSMUST00000024748	-2930	Gtpbp2
chr17	78905937	78909630	20.811	13.3942	-0.635735	ENSMUST00000024880	0	Vit
chr17	57070157	57070799	1.01909	0.432071	-1.23795	ENSMUST00000025053	4038	Mllt1
chr17	28663967	28665917	6.38275	3.71581	-0.780499	ENSMUST00000025060	-1888	4930511I11Rik
chr17	28700730	28701367	0.911821	0.518486	-0.814447	ENSMUST00000025062	-3020	Clps
chr18	31606286	31607514	2.03819	1.29621	-0.652983	ENSMUST00000025110	0	Syt4
chr18	32090045	32091971	5.47093	3.54299	-0.62682	ENSMUST00000025254	0	Lims2
chr18	43216462	43220325	10.2982	5.78976	-0.83082	ENSMUST00000025377	0	Ppp2r2b
chr18	43549111	43554595	26.2819	16.3323	-0.686342	ENSMUST00000025379	0	Dpysl3
chr18	58713325	58714447	2.30637	0.950557	-1.27878	ENSMUST00000025500	-1464	Slc27a6
chr19	12646929	12649469	7.50912	4.75279	-0.65987	ENSMUST00000025595	0	Fam111a
chr19	10753125	10753972	2.25273	1.12339	-1.00382	ENSMUST00000025647	-565	Pga5
chr19	7571151	7572057	1.23364	0.777729	-0.665583	ENSMUST00000025668	2225	Atl3
chr19	34369119	34370635	2.14546	0.864143	-1.31195	ENSMUST00000025691	3972	Fas
chr19	4137110	4137686	0.911821	0.518486	-0.814447	ENSMUST00000025761	1924	Cabp4
chr19	4116610	4117569	1.66273	1.03697	-0.68118	ENSMUST00000025767	4007	Aip
chr19	23835690	23836266	0.911821	0.432071	-1.07748	ENSMUST00000025830	2326	Apba1
chr19	7110406	7111169	1.07273	0.691314	-0.633875	ENSMUST00000025918	3348	Stip1
chr7	104632991	104633664	1.28728	0.259243	-2.31195	ENSMUST00000026126	3527	Ints4
chr19	42108662	42109474	1.18	0.6049	-0.964023	ENSMUST00000026172	-1054	Ankrd2
chr9	123382713	123383760	1.77001	0.691314	-1.35634	ENSMUST00000026269	-4059	Limd1
chr14	8839653	8840196	0.858185	0.432071	-0.990018	ENSMUST00000026313	4175	Abhd6
chr12	119535584	119536431	1.39455	0.691314	-1.01239	ENSMUST00000026367	3483	Sp4
chr11	120241310	120242271	1.6091	1.03697	-0.633875	ENSMUST00000026448	-1233	2310003H01Rik
chr13	120255570	120256279	1.01909	0.432071	-1.23795	ENSMUST00000026519	4006	4833420G17Rik
chr11	118904339	118904986	0.911821	0.259243	-1.81445	ENSMUST00000026663	-2057	Cbx8
chr16	87554050	87554690	0.911821	0.345657	-1.39941	ENSMUST00000026700	477	ORF63
chr2	9972807	9973499	0.965458	0.432071	-1.15994	ENSMUST00000026888	-2585	Taf3
chr7	80663862	80665250	2.03819	1.03697	-0.974911	ENSMUST00000026895	0	Chd2
chr7	81157208	81159389	5.25638	3.0245	-0.797373	ENSMUST00000026896	0	St8sia2
chr1	13575525	13576173	1.07273	0.6049	-0.82652	ENSMUST00000027068	3773	Tram1
chr1	65121362	65122716	2.25273	1.29621	-0.797373	ENSMUST00000027089	-1100	Crygc
chr1	137628147	137629190	1.82364	1.03697	-0.814447	ENSMUST00000027677	2425	Csrp1
chr1	137062105	137064556	10.6737	6.13541	-0.798824	ENSMUST00000027682	0	Gpr37l1
chr1	180337726	180338419	1.01909	0.345657	-1.55987	ENSMUST00000027775	1716	Efcab2
chr1	182494629	182495254	0.911821	0.432071	-1.07748	ENSMUST00000027777	-3832	Parp1
chr1	169220019	169220957	1.34091	0.777729	-0.785878	ENSMUST00000027839	-4762	Uck2
chr1	172039374	172041280	5.20274	2.76526	-0.911859	ENSMUST00000027985	0	Ddr2
chr2	14965780	14966450	1.01909	0.432071	-1.23795	ENSMUST00000028034	4463	Nsun6
chr2	31612165	31613548	2.84274	1.29621	-1.13298	ENSMUST00000028190	-1915	Abl1
chr2	53055846	53056448	0.965458	0.259243	-1.89691	ENSMUST00000028336	4726	Arl6ip6
chr2	93819044	93819701	1.01909	0.259243	-1.97491	ENSMUST00000028621	-490	4921507L20Rik
chr2	120488716	120490395	3.00365	1.2098	-1.31195	ENSMUST00000028734	-281	Stard9
chr2	136937937	136938628	1.23364	0.432071	-1.51358	ENSMUST00000028735	3753	Jag1
chr2	118875835	118876475	1.01909	0.345657	-1.55987	ENSMUST00000028799	2951	Casc5
chr2	132669399	132669934	0.858185	0.259243	-1.72698	ENSMUST00000028835	-2468	Crls1
chr2	148675498	148676137	1.12637	0.691314	-0.704264	ENSMUST00000028937	534	9230104L09Rik
chr3	7368742	7369537	1.07273	0.6049	-0.82652	ENSMUST00000028999	2140	Pkia
chr3	19058138	19058756	0.965458	0.259243	-1.89691	ENSMUST00000029125	4310	Armc1
chr3	36473863	36475164	1.87728	1.12339	-0.74079	ENSMUST00000029270	-2792	Ccna2
chr3	54858417	54859965	3.80819	2.16036	-0.817837	ENSMUST00000029368	0	Ccna1
chr3	132341572	132342222	1.07273	0.6049	-0.82652	ENSMUST00000029663	4622	Aimp1
chr3	88965550	88966070	0.804548	0.518486	-0.633875	ENSMUST00000029686	-1433	Hcn3
chr3	94285586	94286394	1.39455	0.6049	-1.20503	ENSMUST00000029784	2835	Celf3
chr3	144778467	144779026	0.911821	0.518486	-0.814447	ENSMUST00000029920	-2527	Odf2l
chr3	144426228	144426979	1.07273	0.691314	-0.633875	ENSMUST00000029932	-2288	Clca1
chr4	68612150	68616363	9.9764	5.96259	-0.742581	ENSMUST00000030036	0	Dbc1
chr4	41264843	41265498	1.01909	0.518486	-0.974911	ENSMUST00000030145	-2922	Dcaf12
chr4	137883585	137884769	3.9691	0.518486	-2.93644	ENSMUST00000030536	-1364	Pink1
chr4	125165659	125171077	21.2937	10.3697	-1.03805	ENSMUST00000030676	0	Grik3
chr4	147874804	147876065	2.1991	1.12339	-0.969059	ENSMUST00000030840	-236	Angptl7
chr5	98682477	98684252	5.36365	2.50601	-1.09782	ENSMUST00000031280	0	Fgf5
chr5	91319491	91320807	3.80819	2.4196	-0.654339	ENSMUST00000031327	0	Cxcl1
chr5	123500820	123501535	1.34091	0.432071	-1.63387	ENSMUST00000031437	-3796	Morn3
chr5	139832492	139833185	0.965458	0.6049	-0.674516	ENSMUST00000031521	3923	Cyp2w1
chr5	140299173	140299795	0.965458	0.6049	-0.674516	ENSMUST00000031531	3003	Psmg3
chr5	137958754	137959577	1.18	0.345657	-1.77138	ENSMUST00000031727	-531	Gigyf1
chr6	56668621	56669101	0.750912	0.259243	-1.53434	ENSMUST00000031805	3724	Avl9
chr6	30647361	30648319	1.6091	0.6049	-1.41148	ENSMUST00000031810	-3613	Tsga14
chr6	48983257	48983913	1.12637	0.0864143	-3.70426	ENSMUST00000031840	-2604	Gpnmb
chr6	119434257	119435468	2.09183	1.2098	-0.789994	ENSMUST00000032094	4573	Fbxl14
chr6	83108765	83109681	1.55546	0.777729	-1	ENSMUST00000032106	2369	1700003E16Rik
chr6	90571001	90571635	1.07273	0.518486	-1.04891	ENSMUST00000032177	1763	Slc41a3
chr6	91633559	91635863	8.31366	4.32071	-0.944215	ENSMUST00000032185	0	Slc6a6
chr6	124875776	124876438	1.01909	0.6049	-0.752519	ENSMUST00000032214	-4968	Mlf2
chr6	117960941	117962212	2.30637	1.38263	-0.738211	ENSMUST00000032230	0	Rasgef1a
chr6	119776697	119777446	1.18	0.518486	-1.18642	ENSMUST00000032279	-1454	Erc1
chr6	142909818	142910586	1.28728	0.518486	-1.31195	ENSMUST00000032421	2387	St8sia1
chr7	50862239	50862963	1.18	0.518486	-1.18642	ENSMUST00000032661	0	Zfp819
chr7	77503007	77506820	16.1982	8.4686	-0.935641	ENSMUST00000032768	0	Nr2f2
chr7	74785384	74786319	1.28728	0.691314	-0.896909	ENSMUST00000032775	3799	Lrrc28
chr7	30598100	30598873	1.01909	0.172829	-2.55987	ENSMUST00000032796	-2218	Zfp790
chr7	96977893	96978871	1.55546	0.777729	-1	ENSMUST00000032853	103	Me3
chr7	121861827	121862680	1.50182	0.777729	-0.949376	ENSMUST00000032902	0	Calcb
chr7	106326238	106326791	0.804548	0.432071	-0.896909	ENSMUST00000033001	4433	Dgat2
chr7	119301083	119301958	1.71637	1.12339	-0.611507	ENSMUST00000033036	614	Dkk3
chr7	53293808	53294501	1.07273	0.518486	-1.04891	ENSMUST00000033121	4744	Nomo1
chr7	129307422	129308235	1.23364	0.518486	-1.25055	ENSMUST00000033154	4473	Plk1
chr7	128063616	128064286	1.12637	0.345657	-1.70426	ENSMUST00000033173	2360	Polr3e
chr7	109592725	109593612	1.6091	0.777729	-1.04891	ENSMUST00000033283	2518	Rrm1
chrX	70704622	70705076	0.804548	0.345657	-1.21884	ENSMUST00000033737	-240	Haus7
chr8	13163071	13163755	1.18	0.691314	-0.771378	ENSMUST00000033824	3938	Lamp1
chr8	13891300	13892048	1.23364	0.777729	-0.665583	ENSMUST00000033839	-1030	2410022L05Rik
chr8	36561549	36562573	1.71637	0.864143	-0.990018	ENSMUST00000033927	-2963	Eri1
chr8	112094078	112094774	1.18	0.691314	-0.771378	ENSMUST00000034159	4288	Txnl4b
chr8	97186083	97186655	0.858185	0.259243	-1.72698	ENSMUST00000034228	-3895	Arl2bp
chr8	72350589	72351509	1.44819	0.777729	-0.896909	ENSMUST00000034325	4127	Lpar2
chr8	108587978	108588771	1.18	0.172829	-2.77138	ENSMUST00000034376	4189	Nfatc3
chr8	108695822	108696652	1.50182	0.691314	-1.1193	ENSMUST00000034378	3049	Slc7a6
chr8	109677700	109678308	0.858185	0.172829	-2.31195	ENSMUST00000034400	3141	Cyb5b
chr8	127466087	127468251	3.59365	2.24677	-0.677596	ENSMUST00000034469	4904	Egln1
chr9	43555129	43556088	1.50182	0.691314	-1.1193	ENSMUST00000034510	2472	Pvrl1
chr9	44165710	44166324	0.965458	0.345657	-1.48187	ENSMUST00000034644	3430	Vps11
chr9	70267787	70270030	6.38275	2.85167	-1.16237	ENSMUST00000034742	0	Ccnb2
chr9	56269825	56270580	1.44819	0.777729	-0.896909	ENSMUST00000034879	3376	Hmg20a
chr9	78043027	78043976	1.23364	0.518486	-1.25055	ENSMUST00000034903	3256	Gsta4
chr9	64984896	64986176	2.03819	0.777729	-1.38995	ENSMUST00000034961	-2785	Igdcc3
chr9	107794548	107795237	0.965458	0.259243	-1.89691	ENSMUST00000035202	4090	Mon1a
chr2	153350226	153350954	1.07273	0.259243	-2.04891	ENSMUST00000035346	4754	8430427H17Rik
chr15	92425334	92426191	1.23364	0.777729	-0.665583	ENSMUST00000035399	-1349	Pdzrn4
chr19	8737612	8738274	0.965458	0.432071	-1.15994	ENSMUST00000035444	-221	Chrm1
chr13	48962545	48963584	1.44819	0.777729	-0.896909	ENSMUST00000035540	2671	Phf2
chr4	128565724	128566272	0.858185	0.518486	-0.726984	ENSMUST00000035667	4894	Trim62
chr18	46883551	46884472	1.39455	0.518486	-1.42742	ENSMUST00000035804	3525	Cdo1
chr3	40419784	40420342	0.858185	0.432071	-0.990018	ENSMUST00000035860	1493	1700017G19Rik
chr9	80011170	80011767	0.858185	0.345657	-1.31195	ENSMUST00000035889	-1071	Myo6
chr5	28494173	28495412	2.14546	0.345657	-2.63387	ENSMUST00000036177	1939	En2
chr16	45695225	45696974	2.89637	1.2098	-1.25948	ENSMUST00000036617	-1455	Tmprss7
chr11	88836881	88837697	1.34091	0.777729	-0.785878	ENSMUST00000036649	1634	Coil
chr19	54116765	54117367	1.12637	0.518486	-1.1193	ENSMUST00000036700	-2305	Adra2a
chr18	36821383	36822358	1.50182	0.864143	-0.797373	ENSMUST00000036765	-1356	Eif4ebp3
chr6	39501509	39503172	3.05728	1.90111	-0.685405	ENSMUST00000036877	4695	Dennd2a
chr15	52545347	52546034	1.18	0.345657	-1.77138	ENSMUST00000037115	1349	Med30
chr14	49932812	49933826	2.09183	0.950557	-1.13792	ENSMUST00000037120	59	Slc35f4
chr11	4955747	4956538	1.18	0.691314	-0.771378	ENSMUST00000037218	-1593	Rasl10a
chr11	88104588	88106178	2.57455	1.29621	-0.990018	ENSMUST00000037268	-1367	1700106J16Rik
chr7	86412537	86413659	1.87728	0.691314	-1.44123	ENSMUST00000037315	-4428	Abhd2
chr1	182862513	182863274	1.12637	0.172829	-2.70426	ENSMUST00000037361	-1879	Lefty1
chr12	88537147	88537893	1.18	0.259243	-2.18642	ENSMUST00000037418	3287	Tmed8
chr9	64812066	64812770	1.18	0.6049	-0.964023	ENSMUST00000037504	3324	2010321M09Rik
chr2	143837262	143837798	0.965458	0.6049	-0.674516	ENSMUST00000037875	-264	Rrbp1
chr3	146602313	146603073	1.12637	0.6049	-0.896909	ENSMUST00000037942	-3938	Ttll7
chr3	95457169	95458234	1.6091	0.950557	-0.759405	ENSMUST00000037947	-4409	Mcl1
chr9	72771732	72772353	0.965458	0.432071	-1.15994	ENSMUST00000038489	-1099	Pygo1
chr9	51956556	51957843	2.62819	1.38263	-0.926656	ENSMUST00000038822	-3865	Zc3h12c
chr17	25373516	25374427	1.28728	0.6049	-1.08955	ENSMUST00000038973	2635	Gnptg
chr18	74442640	74443321	1.12637	0.691314	-0.704264	ENSMUST00000039077	0	Ccdc11
chr15	81694215	81695340	1.71637	0.950557	-0.852515	ENSMUST00000039199	-4990	Tob2
chr4	139800546	139801210	1.23364	0.345657	-1.83551	ENSMUST00000039331	1490	Igsf21
chrX	150127969	150131399	16.1446	10.1105	-0.675201	ENSMUST00000039424	0	Kctd12b
chr10	26490589	26491436	1.28728	0.691314	-0.896909	ENSMUST00000039557	-847	Arhgap18
chr7	31842935	31844600	3.11092	1.64187	-0.922	ENSMUST00000039775	0	Lgi4
chr15	78973674	78976542	10.2446	6.56749	-0.641448	ENSMUST00000040077	1895	Polr2f
chr18	74365897	74366912	1.50182	0.777729	-0.949376	ENSMUST00000040188	561	Ska1
chr18	75168474	75168992	0.750912	0.432071	-0.797373	ENSMUST00000040284	2922	BC031181
chr18	61068958	61070033	2.14546	1.29621	-0.726984	ENSMUST00000040359	-1401	Arsi
chr10	110737801	110738430	0.858185	0.518486	-0.726984	ENSMUST00000040454	2068	Bbs10
chr18	34660819	34661893	1.50182	0.691314	-1.1193	ENSMUST00000040506	4585	Fam13b
chr8	11012795	11014037	1.87728	1.2098	-0.633875	ENSMUST00000040514	-4338	Irs2
chr17	87825914	87826580	1.01909	0.432071	-1.23795	ENSMUST00000040609	502	1700011E24Rik
chr1	161670500	161672993	5.04183	2.85167	-0.822141	ENSMUST00000040797	2861	Tnr
chr7	36342300	36343085	1.23364	0.691314	-0.835508	ENSMUST00000040962	-978	Nudt19
chr5	124486121	124486793	1.07273	0.345657	-1.63387	ENSMUST00000040967	-3853	Vps37b
chr2	155522221	155523012	1.34091	0.691314	-0.955803	ENSMUST00000041059	-4102	Trpc4ap
chr3	9605932	9606631	1.23364	0.518486	-1.25055	ENSMUST00000041124	3455	Zfp704
chr19	44478002	44478829	1.39455	0.777729	-0.842461	ENSMUST00000041331	3371	Scd1
chr3	116320715	116321639	1.87728	0.691314	-1.44123	ENSMUST00000041524	-3211	Ccdc76
chr13	98008680	98015064	51.4911	32.4918	-0.664248	ENSMUST00000041623	0	Enc1
chr13	23553978	23554717	1.07273	0.518486	-1.04891	ENSMUST00000041674	3028	Btn1a1
chr7	96661234	96667123	33.1474	20.7394	-0.676519	ENSMUST00000041761	0	Prss23
chr19	5990623	5991280	0.911821	0.345657	-1.39941	ENSMUST00000041827	-4481	Slc22a20
chr1	155330525	155331477	1.44819	0.950557	-0.607402	ENSMUST00000042141	3314	Dhx9
chr11	60642255	60643039	1.18	0.518486	-1.18642	ENSMUST00000042281	-1094	Dhrs7b
chr2	6269970	6270866	1.66273	0.864143	-0.944215	ENSMUST00000042503	-2913	Usp6nl
chr10	77651407	77652357	1.44819	0.6049	-1.25948	ENSMUST00000042556	-3514	Pwp2
chr6	72184792	72185783	1.77001	0.950557	-0.896909	ENSMUST00000042646	0	Atoh8
chr18	60659789	60662107	9.33276	4.92561	-0.922	ENSMUST00000042710	0	2010002N04Rik
chr7	135892204	135893178	1.82364	0.950557	-0.939978	ENSMUST00000042942	3822	Sec23ip
chr5	141040029	141041001	1.6091	1.03697	-0.633875	ENSMUST00000042993	25	Grifin
chr12	45366322	45367077	1.12637	0.691314	-0.704264	ENSMUST00000043082	-3096	Pnpla8
chr1	97562360	97565189	7.61639	4.14789	-0.876731	ENSMUST00000043336	0	St8sia4
chr3	115595174	115595617	0.697275	0.345657	-1.01239	ENSMUST00000043342	4075	Dph5
chr8	13911487	13912167	1.01909	0.6049	-0.752519	ENSMUST00000043520	3683	Fbxo25
chr6	48397109	48397671	0.965458	0.432071	-1.15994	ENSMUST00000043676	-557	Sspo
chr4	57040061	57042053	3.48638	1.29621	-1.42742	ENSMUST00000044022	0	Epb4.1l4b
chr2	101462737	101463898	1.77001	1.12339	-0.655901	ENSMUST00000044031	-977	Rag2
chr9	50416879	50417575	1.07273	0.6049	-0.82652	ENSMUST00000044051	4875	Timm8b
chrX	19640636	19641873	1.93092	0.864143	-1.15994	ENSMUST00000044138	3952	Chst7
chr1	54979249	54980217	1.82364	1.03697	-0.814447	ENSMUST00000044359	3015	Ankrd44
chr17	50332655	50333265	1.12637	0.691314	-0.704264	ENSMUST00000044503	-2657	Rftn1
chr19	5394324	5394871	0.804548	0.172829	-2.21884	ENSMUST00000044527	0	Tsga10ip
chr17	44088738	44092323	14.16	7.60446	-0.896909	ENSMUST00000044792	0	Rcan2
chr9	34714901	34715871	1.66273	1.03697	-0.68118	ENSMUST00000045091	2405	Kirrel3
chr10	39961956	39962783	1.18	0.691314	-0.771378	ENSMUST00000045114	4003	Rpf2
chr17	24870721	24871487	1.18	0.691314	-0.771378	ENSMUST00000045186	1093	Rpl3l
chr3	142155072	142156664	2.52092	1.64187	-0.618608	ENSMUST00000045254	-3200	Gbp5
chr4	44309411	44310440	2.09183	0.864143	-1.27542	ENSMUST00000045607	-3308	Melk
chr8	109638046	109639244	1.66273	1.03697	-0.68118	ENSMUST00000046116	-3766	C630050I24Rik
chr6	90279837	90280721	1.39455	0.518486	-1.42742	ENSMUST00000046128	-2562	Uroc1
chr17	48576420	48577282	1.34091	0.864143	-0.633875	ENSMUST00000046549	-4368	Apobec2
chr9	57311414	57312052	1.07273	0.518486	-1.04891	ENSMUST00000046587	3780	Scamp5
chr10	79225695	79226869	1.77001	0.864143	-1.03441	ENSMUST00000047203	2798	Rnf126
chr14	119319864	119321953	3.9691	2.59243	-0.614509	ENSMUST00000047208	437	Dzip1
chr9	114601294	114601785	0.750912	0.259243	-1.53434	ENSMUST00000047404	3388	Dync1li1
chr14	21550505	21551372	1.34091	0.864143	-0.633875	ENSMUST00000047490	-740	Ndst2
chr3	30505556	30506412	1.50182	0.777729	-0.949376	ENSMUST00000047502	4549	Mynn
chr4	135757867	135759007	2.30637	1.29621	-0.831321	ENSMUST00000047526	-3273	Asap3
chr12	16590903	16592243	2.89637	1.64187	-0.818906	ENSMUST00000048538	4334	Lpin1
chr9	48298983	48300501	2.09183	1.29621	-0.690458	ENSMUST00000048956	2910	Rbm7
chr18	65736600	65737462	1.6091	0.950557	-0.759405	ENSMUST00000049016	-2422	Zfp532
chr7	25319308	25320255	1.50182	0.691314	-1.1193	ENSMUST00000049020	3643	Irgq
chr5	125924550	125925561	1.6091	0.950557	-0.759405	ENSMUST00000049040	2614	Bri3bp
chr8	122303449	122304054	1.12637	0.6049	-0.896909	ENSMUST00000049156	-1134	4632415K11Rik
chr12	114394461	114396198	4.77365	3.11091	-0.617755	ENSMUST00000049271	0	4930427A07Rik
chr3	90142483	90143088	0.965458	0.432071	-1.15994	ENSMUST00000049382	-2488	Gatad2b
chr1	137023554	137025172	2.7891	1.55546	-0.842461	ENSMUST00000049449	-4130	Ptpn7
chr12	4085042	4085551	0.911821	0.345657	-1.39941	ENSMUST00000049584	2415	Dnajc27
chr4	154331045	154331733	1.01909	0.518486	-0.974911	ENSMUST00000049621	-3299	Hes5
chr8	108429278	108430214	1.44819	0.864143	-0.744906	ENSMUST00000049699	4939	Pskh1
chr18	53898517	53899232	1.12637	0.432071	-1.38234	ENSMUST00000049811	4976	Cep120
chr2	119305208	119305858	0.965458	0.6049	-0.674516	ENSMUST00000049920	-1786	Ino80
chr3	151851556	151852852	2.03819	1.29621	-0.652983	ENSMUST00000050073	3916	Dnajb4
chr7	25753862	25754599	0.965458	0.6049	-0.674516	ENSMUST00000050267	3107	Rabac1
chr2	92237060	92238131	1.98455	0.864143	-1.19947	ENSMUST00000050312	3290	Mapk8ip1
chr13	93343121	93343999	1.44819	0.259243	-2.48187	ENSMUST00000050658	2189	Spz1
chr10	30972635	30973311	0.965458	0.6049	-0.674516	ENSMUST00000050717	4646	Gm5422
chr12	113660223	113660875	1.28728	0.691314	-0.896909	ENSMUST00000050754	549	A730018C14Rik
chr6	87537073	87537772	1.07273	0.518486	-1.04891	ENSMUST00000050887	2924	Prokr1
chr3	94201788	94206327	18.7728	12.0116	-0.644216	ENSMUST00000050975	0	Lingo4
chr18	33620497	33625202	22.3664	14.5176	-0.623533	ENSMUST00000051087	0	D0H4S114
chr7	100225002	100225772	1.50182	0.950557	-0.65987	ENSMUST00000051179	-2617	Fam181b
chr1	33729747	33730708	1.6091	1.03697	-0.633875	ENSMUST00000051203	3061	1700001G17Rik
chr19	60540036	60540886	1.55546	0.518486	-1.58496	ENSMUST00000051277	3322	Prlhr
chr6	129283569	129284679	2.36001	0.950557	-1.31195	ENSMUST00000051283	-1756	4922502D21Rik
chr8	74085146	74086057	1.50182	0.777729	-0.949376	ENSMUST00000052072	-2377	Tmem221
chr1	130486716	130490303	19.631	12.6165	-0.637822	ENSMUST00000052172	0	Cxcr4
chr11	97489246	97489887	0.965458	0.518486	-0.896909	ENSMUST00000052281	1144	E130012A19Rik
chr2	37288649	37289926	2.03819	0.950557	-1.10044	ENSMUST00000053098	-2211	Zbtb6
chr4	108059940	108061281	3.91547	2.24677	-0.801331	ENSMUST00000053157	-3987	Fam159a
chr17	14343287	14344691	2.09183	1.2098	-0.789994	ENSMUST00000053218	-2450	Dact2
chr17	36975919	36976894	1.55546	0.432071	-1.848	ENSMUST00000053434	1790	Trim26
chr1	193801011	193801963	1.55546	0.950557	-0.710496	ENSMUST00000053463	0	Rd3
chr2	112123791	112125511	3.64728	2.24677	-0.69897	ENSMUST00000053666	0	Slc12a6
chr17	27166287	27167010	1.07273	0.691314	-0.633875	ENSMUST00000053683	85	Ggnbp1
chr6	129527905	129528457	0.911821	0.518486	-0.814447	ENSMUST00000053708	0	Klre1
chr8	96538143	96538708	1.01909	0.518486	-0.974911	ENSMUST00000053766	-1581	Amfr
chr12	83411667	83412350	1.07273	0.432071	-1.31195	ENSMUST00000053969	0	Sipa1l1
chr19	38472162	38472722	1.01909	0.432071	-1.23795	ENSMUST00000054098	1694	Tmem20
chr1	139821603	139823299	3.11092	1.90111	-0.710496	ENSMUST00000054333	-1448	A130050O07Rik
chr6	67119595	67121124	3.11092	1.98753	-0.646365	ENSMUST00000054470	4400	A430010J10Rik
chr14	55193113	55193970	1.55546	0.950557	-0.710496	ENSMUST00000054487	2284	Jub
chr1	34780527	34781560	1.6091	1.03697	-0.633875	ENSMUST00000054582	600	C230030N03Rik
chr13	112048873	112049577	1.23364	0.777729	-0.665583	ENSMUST00000054716	3654	Actbl2
chr2	155059575	155060364	1.18	0.518486	-1.18642	ENSMUST00000054912	-1905	Dynlrb1
chr18	32073991	32074640	0.965458	0.432071	-1.15994	ENSMUST00000054984	-2435	Sft2d3
chrX	58141559	58142415	1.12637	0.172829	-2.70426	ENSMUST00000055041	3966	Sox3
chr8	127277753	127279007	2.09183	1.12339	-0.896909	ENSMUST00000055257	-2045	Fam89a
chr12	80277185	80277902	1.12637	0.172829	-2.70426	ENSMUST00000055262	-3532	Vti1b
chr9	62991524	62991986	0.697275	0.345657	-1.01239	ENSMUST00000055281	2802	Skor1
chrX	103227250	103227946	1.12637	0.432071	-1.38234	ENSMUST00000055941	4591	Atp7a
chr5	123596608	123597594	1.77001	0.777729	-1.18642	ENSMUST00000056053	3644	Setd1b
chr9	99370369	99371453	1.87728	0.777729	-1.2713	ENSMUST00000056103	0	1600029I14Rik
chr12	104647549	104648175	1.07273	0.345657	-1.63387	ENSMUST00000056140	-1520	9330161L09Rik
chr3	88217580	88218291	1.18	0.172829	-2.77138	ENSMUST00000056370	-3343	Pmf1
chr18	37467145	37467958	1.71637	0.777729	-1.14202	ENSMUST00000056712	38	Pcdhb4
chr2	140492017	140498255	33.4156	21.8628	-0.612041	ENSMUST00000056760	0	Flrt3
chr3	58978536	58979392	1.34091	0.864143	-0.633875	ENSMUST00000056898	4616	Gpr87
chr2	59583621	59584359	1.01909	0.6049	-0.752519	ENSMUST00000056900	2764	Tanc1
chr1	92737584	92738220	1.01909	0.6049	-0.752519	ENSMUST00000056925	2132	Col6a3
chr9	108343547	108344562	1.66273	0.691314	-1.26614	ENSMUST00000057265	4736	BC048562
chr3	89209312	89209860	0.804548	0.518486	-0.633875	ENSMUST00000057431	-2598	Lenep
chr10	80383637	80384372	1.07273	0.691314	-0.633875	ENSMUST00000057623	-2648	Lmnb2
chrX	132528864	132530471	6.22184	3.88864	-0.678074	ENSMUST00000058119	507	Arxes2
chr12	70679698	70680436	1.07273	0.691314	-0.633875	ENSMUST00000058639	3580	Mettl21d
chr10	43294934	43296318	1.93092	0.691314	-1.48187	ENSMUST00000058714	-2657	Cd24a
chrX	133402152	133403348	2.62819	1.46904	-0.839193	ENSMUST00000058814	0	Rab9b
chr15	25340336	25346898	30.9483	17.6285	-0.811949	ENSMUST00000058845	0	Basp1
chr3	124025383	124026648	2.41364	1.46904	-0.716337	ENSMUST00000058994	1430	Tram1l1
chr2	179989259	179990333	1.77001	0.777729	-1.18642	ENSMUST00000059080	-1749	Rps21
chr8	128949913	128951124	1.71637	1.12339	-0.611507	ENSMUST00000059093	3514	1810063B05Rik
chr11	22407480	22408387	1.50182	0.691314	-1.1193	ENSMUST00000059319	-3704	Tmem17
chr8	70340787	70343229	6.22184	3.54299	-0.812375	ENSMUST00000059374	0	Psd3
chr8	26703467	26704307	1.28728	0.777729	-0.726984	ENSMUST00000059474	-3177	D830025C05Rik
chr11	6364677	6365883	1.93092	0.864143	-1.15994	ENSMUST00000059507	3259	Purb
chr8	107117055	107117676	1.01909	0.518486	-0.974911	ENSMUST00000059588	1689	Pdp2
chr1	141272750	141273381	0.911821	0.345657	-1.39941	ENSMUST00000059825	238	Crb1
chr8	37157042	37161781	38.9938	24.9737	-0.642832	ENSMUST00000060045	0	D8Ertd82e
chr15	80712235	80713226	1.66273	0.864143	-0.944215	ENSMUST00000060230	1005	Tnrc6b
chr9	14578047	14578688	0.965458	0.172829	-2.48187	ENSMUST00000060330	-2574	1700012B09Rik
chr19	22016400	22017738	2.95001	1.29621	-1.18642	ENSMUST00000060477	3833	Gm5514
chr10	98879434	98880315	1.44819	0.432071	-1.74491	ENSMUST00000060657	-2841	B530045E10Rik
chr15	89005552	89006347	1.23364	0.691314	-0.835508	ENSMUST00000060808	-1273	Plxnb2
chr5	141203865	141204558	1.07273	0.432071	-1.31195	ENSMUST00000060918	3786	Amz1
chr16	30314178	30314828	1.12637	0.259243	-2.1193	ENSMUST00000061190	-3314	Gp5
chr11	59043549	59044661	1.6091	1.03697	-0.633875	ENSMUST00000061242	-1778	Arf1
chr18	37915100	37916109	1.82364	0.432071	-2.07748	ENSMUST00000061279	0	Pcdhga11
chr10	33998783	33999383	1.01909	0.345657	-1.55987	ENSMUST00000061372	-2613	Tspyl1
chr17	23988378	23989142	1.23364	0.518486	-1.25055	ENSMUST00000061725	-1368	Prss32
chr1	173289652	173292437	8.42094	2.59243	-1.69968	ENSMUST00000061878	0	Klhdc9
chr10	33847320	33848097	1.12637	0.691314	-0.704264	ENSMUST00000062784	0	Fam26f
chr10	69907505	69908396	1.39455	0.0864143	-4.01239	ENSMUST00000062883	3833	Fam13c
chr16	65105044	65106079	1.6091	0.864143	-0.896909	ENSMUST00000063076	0	Htr1f
chr9	121846274	121848593	7.13366	2.16036	-1.72337	ENSMUST00000063103	0	1700048O20Rik
chr17	80600800	80602038	2.36001	1.2098	-0.964023	ENSMUST00000063403	3983	Srsf7
chr11	106029777	106030594	1.07273	0.6049	-0.82652	ENSMUST00000063715	4720	Strada
chr13	104831103	104831841	1.23364	0.172829	-2.83551	ENSMUST00000063812	-4457	Nln
chr17	79312152	79313291	2.41364	0.864143	-1.48187	ENSMUST00000063817	-2548	1110001A16Rik
chr3	21973546	21975472	16.9491	10.9746	-0.627042	ENSMUST00000063988	-102	Tbl1xr1
chr18	32111063	32111832	1.18	0.345657	-1.77138	ENSMUST00000064016	-1774	Gpr17
chr11	59914262	59914845	0.858185	0.432071	-0.990018	ENSMUST00000064190	-3670	Rai1
chr1	173196146	173196879	1.23364	0.777729	-0.665583	ENSMUST00000064272	-3580	B4galt3
chr19	29177979	29178585	0.858185	0.172829	-2.31195	ENSMUST00000064393	2116	Rcl1
chr13	8201254	8202829	2.95001	1.2098	-1.28595	ENSMUST00000064473	0	Adarb2
chr8	119679417	119679996	0.858185	0.172829	-2.31195	ENSMUST00000064488	-2039	Gan
chr17	32523513	32524703	2.03819	0.777729	-1.38995	ENSMUST00000064694	0	Wiz
chr9	30726976	30727768	1.12637	0.6049	-0.896909	ENSMUST00000065112	2270	Adamts15
chr4	35791638	35792697	1.82364	0.950557	-0.939978	ENSMUST00000065173	0	Lingo2
chr18	82576201	82577320	1.66273	0.432071	-1.94421	ENSMUST00000065224	-33	Galr1
chr1	153278815	153279725	1.66273	0.172829	-3.26614	ENSMUST00000065625	3039	1190005F20Rik
chr6	5063387	5063968	0.858185	0.432071	-0.990018	ENSMUST00000065842	0	Ppp1r9a
chr13	4770201	4770923	2.1991	0.6049	-1.86214	ENSMUST00000065956	0	Gm5444
chr5	139931988	139932715	1.12637	0.518486	-1.1193	ENSMUST00000066052	3742	3110082I17Rik
chr12	73540031	73540919	1.44819	0.777729	-0.896909	ENSMUST00000066073	-1934	Lrrc9
chr11	81781401	81783165	5.90002	2.4196	-1.28595	ENSMUST00000066197	0	Accn1
chr1	90965563	90970359	30.0365	18.5791	-0.693037	ENSMUST00000066279	0	Sh3bp4
chr19	37628170	37628801	1.07273	0.518486	-1.04891	ENSMUST00000066439	3264	Exoc6
chr7	73884837	73885802	1.39455	0.432071	-1.69046	ENSMUST00000066475	-2588	Lass3
chr18	75116597	75117490	1.6091	0.6049	-1.41148	ENSMUST00000066532	3428	Lipg
chr18	60909845	60910778	1.44819	0.518486	-1.48187	ENSMUST00000066785	-1542	Ndst1
chr15	82687011	82688277	1.77001	0.950557	-0.896909	ENSMUST00000066843	0	Tcf20
chr13	42804691	42805874	3.43274	1.98753	-0.788384	ENSMUST00000066928	0	Phactr1
chr1	183157557	183158044	0.750912	0.172829	-2.1193	ENSMUST00000066988	1352	A430110L20Rik
chr8	36023329	36024066	1.07273	0.432071	-1.31195	ENSMUST00000067161	-4040	Gm9939
chr15	7075775	7076565	1.01909	0.259243	-1.97491	ENSMUST00000067190	-2994	Lifr
chr14	28151042	28152183	1.50182	0.864143	-0.797373	ENSMUST00000067296	1773	Arhgef3
chr15	59475831	59476772	1.55546	0.432071	-1.848	ENSMUST00000067543	-3133	Trib1
chr1	92899325	92899898	0.858185	0.259243	-1.72698	ENSMUST00000068116	4023	Lrrfip1
chr15	91990785	91995535	19.2555	12.098	-0.670503	ENSMUST00000068378	0	Cntn1
chr1	181178870	181179564	1.12637	0.259243	-2.1193	ENSMUST00000068437	0	Smyd3
chr4	56961740	56962366	0.858185	0.518486	-0.726984	ENSMUST00000068792	-1432	D730040F13Rik
chr7	137411753	137412448	0.911821	0.432071	-1.07748	ENSMUST00000068807	-1432	Fgfr2
chr5	24187548	24188053	0.750912	0.172829	-2.1193	ENSMUST00000068825	-3580	Nub1
chr16	34902655	34903309	1.01909	0.345657	-1.55987	ENSMUST00000068988	2329	Mylk
chr1	65081619	65082610	1.87728	1.03697	-0.856267	ENSMUST00000069142	-2287	Akr1cl
chr10	116811165	116811880	1.39455	0.691314	-1.01239	ENSMUST00000069168	2150	Cpsf6
chr5	123744767	123745177	0.750912	0.259243	-1.53434	ENSMUST00000069311	859	Wdr66
chr7	91831056	91832128	1.82364	0.777729	-1.22948	ENSMUST00000069537	-3196	Zfand6
chr2	118999472	119000246	1.39455	0.864143	-0.690458	ENSMUST00000069711	0	Gm14137
chr1	82290354	82291479	1.93092	1.12339	-0.781432	ENSMUST00000069799	-2364	Irs1
chr6	72051926	72052368	0.750912	0.172829	-2.1193	ENSMUST00000069994	4321	St3gal5
chr9	21532657	21533722	1.98455	0.777729	-1.35147	ENSMUST00000070068	4583	Ldlr
chr6	143024488	143025667	1.6091	0.6049	-1.41148	ENSMUST00000070301	1505	5730419I09Rik
chr8	36438757	36441348	6.27548	3.80223	-0.72288	ENSMUST00000070481	0	Ppp1r3b
chr9	92432720	92433585	1.39455	0.777729	-0.842461	ENSMUST00000070522	-3476	Plod2
chr2	73464317	73465335	1.77001	0.950557	-0.896909	ENSMUST00000070579	-521	Chn1
chr18	24126120	24126764	1.01909	0.432071	-1.23795	ENSMUST00000070583	3482	Zscan30
chr16	4883562	4884137	0.858185	0.259243	-1.72698	ENSMUST00000070658	-2115	Mgrn1
chr15	62053791	62054609	1.23364	0.518486	-1.25055	ENSMUST00000070786	-2834	H2afy3
chr17	37217337	37218228	1.34091	0.691314	-0.955803	ENSMUST00000070808	4954	Olfr90
chr10	21404917	21405856	1.55546	0.777729	-1	ENSMUST00000071008	-4795	Gm5420
chr9	85672039	85673200	1.93092	0.864143	-1.15994	ENSMUST00000071172	3080	Gm5619
chr5	145305799	145309941	15.0719	9.24633	-0.704906	ENSMUST00000071782	0	Nptx2
chr13	43496365	43497253	1.66273	0.6049	-1.45879	ENSMUST00000071926	2622	Nol7
chr9	72017409	72018289	1.50182	0.777729	-0.949376	ENSMUST00000071965	4499	Gm7866
chr9	23029306	23029943	1.07273	0.6049	-0.82652	ENSMUST00000071982	1788	Bmper
chr18	7580395	7581321	1.66273	0.950557	-0.806711	ENSMUST00000072582	-193	Fabp5l2
chr3	109942380	109942928	0.965458	0.345657	-1.48187	ENSMUST00000072596	-3955	Ntng1
chr1	72048849	72049633	1.28728	0.777729	-0.726984	ENSMUST00000072765	-1229	Gm5528
chr18	72506794	72511122	23.0101	13.7399	-0.743897	ENSMUST00000073379	0	Dcc
chr12	35120939	35121392	0.750912	0.345657	-1.1193	ENSMUST00000073838	874	Hdac9
chr6	119127806	119129046	1.77001	0.950557	-0.896909	ENSMUST00000073909	2502	Dcp1b
chr7	30772259	30772968	1.34091	0.777729	-0.785878	ENSMUST00000074322	0	Zfp568
chr6	79968380	79971169	10.2446	4.92561	-1.05649	ENSMUST00000074662	0	Lrrtm4
chr5	93526093	93526953	1.6091	0.777729	-1.04891	ENSMUST00000074733	3612	2011-09-01
chr11	97992553	97993260	1.07273	0.691314	-0.633875	ENSMUST00000075071	-1037	Fbxl20
chr8	105306394	105309884	16.6273	9.6784	-0.780716	ENSMUST00000075190	0	Cdh11
chr15	95356393	95359639	16.7346	8.03653	-1.05819	ENSMUST00000075275	0	Nell2
chr2	138106222	138106794	0.911821	0.518486	-0.814447	ENSMUST00000075410	1995	Btbd3
chr5	91336444	91337192	1.07273	0.518486	-1.04891	ENSMUST00000075433	3547	Cxcl2
chr7	20332274	20333193	1.50182	0.691314	-1.1193	ENSMUST00000075447	1730	Pvrl2
chr13	34214858	34219716	23.6001	13.3942	-0.817182	ENSMUST00000075774	2508	Tubb2b
chr10	128364444	128367732	7.72366	3.88864	-0.990018	ENSMUST00000076079	-3137	Itga7
chr19	56887010	56887704	1.07273	0.345657	-1.63387	ENSMUST00000076085	470	A630007B06Rik
chr9	104029220	104030512	1.71637	0.864143	-0.990018	ENSMUST00000076147	-248	Ccrl1
chr14	56106587	56107749	1.6091	0.172829	-3.21884	ENSMUST00000076236	-2181	Lrrc16b
chr9	108254433	108255274	1.23364	0.691314	-0.835508	ENSMUST00000076375	4191	Usp4
chr9	75160312	75161026	1.07273	0.6049	-0.82652	ENSMUST00000076889	1112	Gnb5
chr16	64773216	64774366	1.71637	0.518486	-1.72698	ENSMUST00000076991	-2230	4930453N24Rik
chr11	53308158	53311048	7.56275	4.2343	-0.836788	ENSMUST00000077111	-3638	Rpl9-ps3
chr5	138403428	138405193	4.13001	1.90111	-1.1193	ENSMUST00000077119	0	Gjc3
chr11	47192195	47193177	1.82364	0.864143	-1.07748	ENSMUST00000077221	0	Sgcd
chr6	47758243	47758992	1.18	0.345657	-1.77138	ENSMUST00000077290	4520	Pdia4
chr3	86351552	86352522	1.50182	0.6049	-1.31195	ENSMUST00000077524	0	Mab21l2
chr4	63214609	63215533	1.39455	0.691314	-1.01239	ENSMUST00000077709	-4282	6330416G13Rik
chr10	79752919	79753681	1.07273	0.691314	-0.633875	ENSMUST00000077945	-1495	Rps15
chr14	58348844	58349925	2.68183	1.2098	-1.14845	ENSMUST00000077981	3213	Lats2
chr13	114136311	114136886	0.804548	0.259243	-1.63387	ENSMUST00000078163	3557	BC067074
chr11	58761322	58764392	14.16	8.64143	-0.712484	ENSMUST00000078267	0	Hist3h2ba
chr7	112931902	112934157	4.55911	2.50601	-0.863356	ENSMUST00000078482	1908	Dchs1
chr5	115887969	115890160	5.20274	3.19733	-0.702406	ENSMUST00000078701	-1355	4930430O22Rik
chr19	48278419	48282315	11.8	6.39466	-0.883853	ENSMUST00000078880	0	Sorcs3
chr10	23657613	23658830	2.14546	1.38263	-0.633875	ENSMUST00000079134	0	Taar2
chr3	105263504	105264170	0.965458	0.518486	-0.896909	ENSMUST00000079169	1806	Kcnd3
chr5	121458739	121459733	1.55546	0.777729	-1	ENSMUST00000079204	0	Rph3a
chr6	34545388	34545986	0.911821	0.432071	-1.07748	ENSMUST00000079391	-2514	Cald1
chr7	133969892	133970722	1.01909	0.518486	-0.974911	ENSMUST00000079423	3077	Fam57b
chr17	26001305	26001947	1.07273	0.259243	-2.04891	ENSMUST00000079461	-2846	Wdr90
chr5	113002521	113003454	1.50182	0.6049	-1.31195	ENSMUST00000079491	2744	Sez6l
chr7	4758784	4759771	1.66273	0.950557	-0.806711	ENSMUST00000079496	4172	Ube2s
chr15	85335424	85337099	3.54001	2.16036	-0.712484	ENSMUST00000079690	-4143	Gm4825
chr3	89805232	89806035	1.34091	0.518486	-1.37084	ENSMUST00000079724	-2625	Hax1
chr19	7680740	7682001	2.14546	1.29621	-0.726984	ENSMUST00000079902	0	Lgals12
chr7	4631319	4631858	0.858185	0.432071	-0.990018	ENSMUST00000079970	4708	Hspbp1
chr13	110367520	110368249	1.07273	0.691314	-0.633875	ENSMUST00000079975	-3350	Pde4d
chr14	51766193	51766802	0.911821	0.345657	-1.39941	ENSMUST00000080126	0	Rnase1
chr15	76698087	76699369	2.09183	1.29621	-0.690458	ENSMUST00000080406	2497	Zfp251
chr13	98532740	98534815	5.5782	2.85167	-0.967992	ENSMUST00000080443	-2154	Gm10260
chr8	89381518	89382578	1.44819	0.864143	-0.744906	ENSMUST00000080846	2635	N4bp1
chr2	181493885	181495149	2.03819	0.864143	-1.23795	ENSMUST00000081125	-2888	Myt1
chr7	112718687	112719388	1.18	0.6049	-0.964023	ENSMUST00000081165	3529	Apbb1
chr5	74034012	74034593	0.911821	0.432071	-1.07748	ENSMUST00000081170	4360	Sgcb
chr2	157197179	157198121	1.66273	1.03697	-0.68118	ENSMUST00000081202	3851	Manbal
chr4	134051157	134051825	1.12637	0.432071	-1.38234	ENSMUST00000081525	-787	Paqr7
chr6	21167510	21170775	14.3746	8.72784	-0.719824	ENSMUST00000081542	2009	Kcnd2
chr12	32630907	32631670	1.07273	0.172829	-2.63387	ENSMUST00000081639	3731	Hbp1
chr11	6193878	6194595	1.07273	0.432071	-1.31195	ENSMUST00000081894	1272	Ogdh
chr9	37245643	37246643	1.71637	0.691314	-1.31195	ENSMUST00000081943	-4884	Robo3
chr5	77540575	77541213	0.965458	0.345657	-1.48187	ENSMUST00000081964	2974	Hopx
chr14	65373093	65374959	2.7891	1.55546	-0.842461	ENSMUST00000082508	340	SNORA36
chr11	116185020	116185828	1.07273	0.432071	-1.31195	ENSMUST00000082654	2204	n-R5s74
chr7	117169211	117170030	1.18	0.691314	-0.771378	ENSMUST00000082666	2489	SNORA13
chr4	122964729	122965329	0.858185	0.518486	-0.726984	ENSMUST00000082721	-3258	SNORA55
chr12	13173983	13175340	2.52092	1.29621	-0.959645	ENSMUST00000082783	-3415	U8
chr1	88246199	88246800	0.965458	0.345657	-1.48187	ENSMUST00000082903	1077	Snora75
chr2	32077744	32078445	1.12637	0.691314	-0.704264	ENSMUST00000083112	256	SNORD62
chr14	76249219	76251011	3.48638	1.03697	-1.74935	ENSMUST00000083213	1509	Snora31
chr7	104666840	104669309	3.54001	2.24677	-0.655901	ENSMUST00000083426	-1009	SNORA32
chr2	180627193	180630873	12.39	6.049	-1.03441	ENSMUST00000083520	0	Mir124a-3
chr6	124667356	124668407	1.66273	1.03697	-0.68118	ENSMUST00000083528	0	Mir200c
chr7	147143014	147144142	1.71637	0.864143	-0.990018	ENSMUST00000083568	0	Mir202
chr15	103118024	103118962	1.28728	0.6049	-1.08955	ENSMUST00000083626	2470	Mir148b
chr1	23292469	23293546	1.50182	0.691314	-1.1193	ENSMUST00000083633	-4994	Mir30c-2
chr14	27312659	27313180	0.804548	0.518486	-0.633875	ENSMUST00000083930	-3961	SNORA71
chr7	17057292	17057858	0.911821	0.259243	-1.81445	ENSMUST00000083959	132	n-R5s151
chr18	35104266	35105188	1.50182	0.864143	-0.797373	ENSMUST00000083970	-1900	SNORD63
chr15	98355807	98356422	1.12637	0.345657	-1.70426	ENSMUST00000084005	492	Snora2b
chr4	151467081	151467674	0.911821	0.432071	-1.07748	ENSMUST00000084115	-3154	Plekhg5
chr4	147503009	147506670	14.16	7.51804	-0.913397	ENSMUST00000084129	0	Mad2l2
chr5	134942822	134943461	0.858185	0.432071	-0.990018	ENSMUST00000084281	3714	Gm16020
chr4	62074655	62076028	2.25273	1.38263	-0.704264	ENSMUST00000084524	4826	Prpf4
chr17	24546923	24547600	1.18	0.691314	-0.771378	ENSMUST00000084725	2970	D330041H03Rik
chr12	99810168	99814182	20.221	11.7523	-0.782904	ENSMUST00000085120	0	Kcnk10
chr18	38400132	38401524	3.91547	2.07394	-0.916808	ENSMUST00000085340	-2939	Gm10268
chr12	32892760	32893781	2.09183	0.864143	-1.27542	ENSMUST00000085469	0	Pik3cg
chr1	194953554	194954299	1.28728	0.6049	-1.08955	ENSMUST00000085555	2147	Diexf
chr1	192844677	192845339	1.12637	0.345657	-1.70426	ENSMUST00000085635	4731	Mfsd7b
chr1	190832963	190833671	0.965458	0.345657	-1.48187	ENSMUST00000085678	-1245	Kctd3
chr1	174081133	174081872	1.07273	0.518486	-1.04891	ENSMUST00000085918	2838	Dcaf8
chr1	159436543	159437781	1.82364	1.03697	-0.814447	ENSMUST00000086130	0	Sec16b
chr9	24909431	24910016	0.911821	0.518486	-0.814447	ENSMUST00000086236	-3507	Gm10180
chr19	53447393	53448330	1.39455	0.518486	-1.42742	ENSMUST00000086887	-1138	Gm10197
chr19	47579918	47580560	0.911821	0.345657	-1.39941	ENSMUST00000086929	2704	Obfc1
chr19	41146625	41147228	0.965458	0.259243	-1.89691	ENSMUST00000087176	4376	Opalin
chr5	37632430	37633915	2.95001	1.90111	-0.633875	ENSMUST00000087535	0	Crmp1
chr2	171867742	171869172	2.36001	1.38263	-0.771378	ENSMUST00000087950	0	Cbln4
chr2	79295911	79297185	2.95001	0.691314	-2.09331	ENSMUST00000088056	0	Neurod1
chr4	137134014	137134641	0.911821	0.518486	-0.814447	ENSMUST00000088339	-3457	Ldlrad2
chr17	24584323	24585229	1.98455	0.864143	-1.19947	ENSMUST00000088506	-4274	Dnase1l2
chr1	9590474	9594020	18.3437	9.6784	-0.922444	ENSMUST00000088666	0	3110035E14Rik
chrX	50946725	50947689	1.55546	0.691314	-1.16993	ENSMUST00000088779	0	Cxx1a
chr16	31423163	31424000	1.18	0.518486	-1.18642	ENSMUST00000089759	799	Bdh1
chr15	51870207	51870624	0.697275	0.172829	-2.01239	ENSMUST00000090025	-1029	Aard
chr2	118379258	118380613	6.43638	0.432071	-3.89691	ENSMUST00000090219	-3836	Bmf
chr3	108057830	108058576	1.07273	0.345657	-1.63387	ENSMUST00000090569	-1268	Psma5
chr2	84321793	84322579	1.50182	0.777729	-0.949376	ENSMUST00000090732	-4862	Tfpi
chr3	87797950	87799850	4.02274	2.24677	-0.840325	ENSMUST00000090971	4429	Bcan
chr2	26084634	26085272	1.18	0.6049	-0.964023	ENSMUST00000091263	-3744	Qsox2
chr13	72765108	72767719	5.31002	3.0245	-0.81202	ENSMUST00000091507	0	Irx2
chr3	96051092	96053901	11.6928	6.82673	-0.77635	ENSMUST00000091711	420	Hist2h3c1
chr13	22124587	22129969	18.8264	12.0116	-0.648333	ENSMUST00000091742	0	Hist1h2ah
chr8	20017232	20017926	1.71637	0.864143	-0.990018	ENSMUST00000092138	2368	2610005L07Rik
chr10	114801838	114802662	1.18	0.6049	-0.964023	ENSMUST00000092170	-2521	Tmem19
chr11	121380771	121381318	0.911821	0.432071	-1.07748	ENSMUST00000092298	-125	Zfp750
chr7	3395424	3396043	0.858185	0.172829	-2.31195	ENSMUST00000092351	859	Cacng8
chr11	117339565	117341492	3.16456	1.8147	-0.802272	ENSMUST00000092394	-4190	Gm11733
chr10	32614167	32614905	1.28728	0.6049	-1.08955	ENSMUST00000092602	-3900	Nkain2
chr10	28936213	28938193	2.95001	1.29621	-1.18642	ENSMUST00000092627	4766	9330159F19Rik
chr11	94978114	94978883	1.55546	0.950557	-0.710496	ENSMUST00000092768	-2520	Dlx3
chr11	79890116	79890962	1.18	0.6049	-0.964023	ENSMUST00000092858	3477	Crlf3
chr11	72834813	72835565	1.23364	0.777729	-0.665583	ENSMUST00000092937	2270	Camkk1
chr11	20446940	20447586	1.07273	0.432071	-1.31195	ENSMUST00000093292	3605	Sertad2
chr11	6293422	6294935	3.54001	1.72829	-1.03441	ENSMUST00000093347	-193	Zmiz2
chr8	47638775	47639514	1.34091	0.259243	-2.37084	ENSMUST00000093518	1336	Mlf1ip
chr1	15798005	15798755	1.39455	0.691314	-1.01239	ENSMUST00000093770	2262	Terf1
chr11	98772968	98773833	1.18	0.691314	-0.771378	ENSMUST00000093937	3505	Cdc6
chr7	146800996	146803663	4.55911	2.33319	-0.96645	ENSMUST00000093991	0	E030019B06Rik
chr7	135087654	135088685	1.93092	1.12339	-0.781432	ENSMUST00000094026	1555	Prss36
chr11	63729681	63730971	2.09183	0.691314	-1.59735	ENSMUST00000094103	4822	Hs3st3b1
chr4	151664055	151664951	1.23364	0.777729	-0.665583	ENSMUST00000094438	821	Hes3
chr5	111844867	111850726	26.6574	16.0731	-0.72989	ENSMUST00000094463	0	Mn1
chr7	19750960	19752108	2.57455	1.29621	-0.990018	ENSMUST00000094790	0	Gipr
chr7	17576584	17577618	1.66273	0.6049	-1.45879	ENSMUST00000094805	-439	Ccdc8
chr7	6102671	6103527	1.39455	0.518486	-1.42742	ENSMUST00000094870	4047	Zfp787
chr4	104005445	104006222	1.01909	0.259243	-1.97491	ENSMUST00000094945	4590	Gm10304
chr5	13393072	13393568	0.750912	0.259243	-1.53434	ENSMUST00000095012	-3216	Sema3a
chr4	59012341	59013387	2.03819	1.2098	-0.752519	ENSMUST00000095070	-2657	Dnajc25
chr10	80167613	80168221	0.965458	0.6049	-0.674516	ENSMUST00000095426	2177	Izumo4
chr12	86039880	86040498	1.12637	0.518486	-1.1193	ENSMUST00000095550	-124	Tmem90a
chr10	66587586	66594195	34.7028	22.0356	-0.655215	ENSMUST00000095573	0	Jmjd1c
chr10	20675013	20675749	1.23364	0.518486	-1.25055	ENSMUST00000095801	2550	Ahi1
chr6	42206631	42207898	2.52092	1.38263	-0.866535	ENSMUST00000095987	-4071	Tmem139
chr16	56024830	56026608	2.68183	1.55546	-0.785878	ENSMUST00000096021	-50	Pcnp
chr8	19876510	19877373	1.6091	0.777729	-1.04891	ENSMUST00000096485	1400	6820431F20Rik
chr5	14973023	14974293	2.1991	0.691314	-1.6695	ENSMUST00000096953	4643	Gm10354
chr1	155260409	155261233	1.28728	0.691314	-0.896909	ENSMUST00000097535	-4684	E330020D12Rik
chr18	67796972	67797719	1.18	0.518486	-1.18642	ENSMUST00000097542	3272	Cep76
chr1	125941322	125942179	1.87728	1.2098	-0.633875	ENSMUST00000097605	0	Gm10543
chr18	34921164	34923735	4.50547	2.24677	-1.00382	ENSMUST00000097622	1956	Fam53c
chr1	26743636	26744618	1.39455	0.777729	-0.842461	ENSMUST00000097801	0	4931408C20Rik
chr4	135846581	135847430	1.34091	0.691314	-0.955803	ENSMUST00000097841	4266	Zfp46
chr4	128919583	128920269	1.12637	0.6049	-0.896909	ENSMUST00000097873	-3166	C77080
chr4	122515298	122516008	1.6091	0.864143	-0.896909	ENSMUST00000097902	1803	Ppt1
chr7	134452531	134453488	1.71637	0.950557	-0.852515	ENSMUST00000098028	0	Itgal
chr7	127470443	127471906	2.52092	0.691314	-1.86654	ENSMUST00000098078	-292	Abca15
chr7	109721365	109722432	1.66273	1.03697	-0.68118	ENSMUST00000098225	-4551	Olfr550
chr9	121865211	121866086	1.28728	0.518486	-1.31195	ENSMUST00000098269	3361	Fam198a
chr8	127416237	127417366	1.87728	1.03697	-0.856267	ENSMUST00000098312	4240	Exoc8
chr8	125763218	125763928	1.18	0.6049	-0.964023	ENSMUST00000098327	-3110	Spata2L
chr9	56005667	56006720	1.77001	1.03697	-0.771378	ENSMUST00000098723	1877	Tspan3
chr8	37790442	37791237	1.39455	0.432071	-1.69046	ENSMUST00000098826	4872	Dlc1
chr3	90339054	90339878	1.18	0.345657	-1.77138	ENSMUST00000098911	-1298	S100a16
chr13	120279481	120280396	1.39455	0.691314	-1.01239	ENSMUST00000099147	-1115	Gm7120
chr13	120271918	120272678	1.01909	0.518486	-0.974911	ENSMUST00000099148	4513	3110070M22Rik
chr2	148264865	148266154	2.03819	1.2098	-0.752519	ENSMUST00000099269	3146	Cd93
chr10	88909742	88910201	0.697275	0.432071	-0.690458	ENSMUST00000099374	-3031	Gas2l3
chr2	128796672	128797400	0.965458	0.6049	-0.674516	ENSMUST00000099385	-3212	Gm10762
chr17	33427049	33427711	0.965458	0.518486	-0.896909	ENSMUST00000099414	457	Zfp955b
chr16	95218801	95219704	1.66273	0.950557	-0.806711	ENSMUST00000099508	0	Kcnj6
chr19	29883876	29884898	1.44819	0.6049	-1.25948	ENSMUST00000099525	2567	Ranbp6
chr10	76470557	76471307	1.34091	0.864143	-0.633875	ENSMUST00000099552	-3433	Gm10787
chr19	24553079	24554203	1.6091	0.518486	-1.63387	ENSMUST00000099556	-1234	Fam122a
chr13	9493355	9494945	2.89637	1.72829	-0.744906	ENSMUST00000099913	1008	Dip2c
chr13	3894056	3894902	1.12637	0.345657	-1.70426	ENSMUST00000099946	-1233	Net1
chr10	24916626	24920904	32.9328	19.184	-0.779625	ENSMUST00000100012	0	Akap7
chr10	10408361	10410030	3.3791	1.8147	-0.896909	ENSMUST00000100068	-927	Gm10828
chr15	99807185	99808022	1.23364	0.777729	-0.665583	ENSMUST00000100206	3976	Larp4
chr14	119249661	119250303	0.858185	0.518486	-0.726984	ENSMUST00000100314	-3651	Cldn10
chr14	109308451	109309150	1.18	0.518486	-1.18642	ENSMUST00000100322	4307	Slitrk1
chr11	102749034	102750292	2.14546	0.950557	-1.17444	ENSMUST00000100369	2553	Fam187a
chr14	70889324	70890084	1.01909	0.6049	-0.752519	ENSMUST00000100405	1185	Bmp1
chr15	75912971	75913629	1.23364	0.6049	-1.02815	ENSMUST00000100527	-1596	Puf60
chr15	65803865	65804309	0.750912	0.259243	-1.53434	ENSMUST00000100584	4058	Hhla1
chr14	52602351	52603099	1.12637	0.259243	-2.1193	ENSMUST00000100639	-1409	Arhgef40
chr14	34752222	34753102	1.6091	0.864143	-0.896909	ENSMUST00000100720	-1123	Gdf2
chr15	27614372	27615058	1.12637	0.691314	-0.704264	ENSMUST00000100739	-3111	Fam105a
chr6	113486220	113487541	1.87728	0.950557	-0.981798	ENSMUST00000101051	4524	Fancd2
chr12	104191720	104192984	1.82364	1.03697	-0.814447	ENSMUST00000101099	4653	Unc79
chr5	72555322	72556527	1.71637	1.12339	-0.611507	ENSMUST00000101142	-990	Commd8
chr6	90762033	90762903	1.23364	0.777729	-0.665583	ENSMUST00000101151	-1917	Iqsec1
chr5	49675293	49677420	3.3791	2.16036	-0.64537	ENSMUST00000101214	0	Kcnip4
chrX	133492061	133492996	1.39455	0.691314	-1.01239	ENSMUST00000101228	0	Tmsb15l
chrX	76762299	76763145	1.34091	0.518486	-1.37084	ENSMUST00000101410	0	Gm7173
chr5	5573351	5574651	2.89637	1.72829	-0.744906	ENSMUST00000101627	0	Gm8773
chr12	55829650	55830172	0.911821	0.259243	-1.81445	ENSMUST00000101973	-417	U1
chr14	73605955	73606658	0.911821	0.518486	-0.814447	ENSMUST00000102166	0	Mir687
chr13	113826310	113827057	1.55546	0.864143	-0.847999	ENSMUST00000102192	121	Mir449c
chr16	17124010	17126101	8.58185	5.01203	-0.775894	ENSMUST00000102333	0	Mir301b
chr11	75009812	75010737	1.71637	1.03697	-0.726984	ENSMUST00000102514	2529	Rtn4rl1
chr11	69902729	69903491	1.34091	0.6049	-1.14845	ENSMUST00000102572	-2655	Asgr2
chr4	129378093	129380818	7.02639	4.14789	-0.760407	ENSMUST00000102588	-4012	Tmem39b
chr2	28059266	28060241	1.50182	0.777729	-0.949376	ENSMUST00000102879	-938	Olfm1
chr11	116779327	116781258	7.1873	4.57996	-0.650115	ENSMUST00000103027	0	Mgat5b
chr2	181046896	181049931	11.6391	6.91314	-0.75157	ENSMUST00000103045	0	Stmn3
chr11	99010843	99011824	1.44819	0.432071	-1.74491	ENSMUST00000103134	4568	Ccr7
chr2	143737214	143737729	0.750912	0.0864143	-3.1193	ENSMUST00000103172	-3327	Dstn
chr14	54810890	54811913	1.50182	0.864143	-0.797373	ENSMUST00000103713	0	Gm16820
chr14	54844922	54845534	0.911821	0.345657	-1.39941	ENSMUST00000103740	4728	Trac
chr7	82904709	82905436	1.23364	0.6049	-1.02815	ENSMUST00000103773	-2456	AC158749.1
chr14	26644068	26644672	0.911821	0.259243	-1.81445	ENSMUST00000103893	2920	AC164303.1
chr10	44811700	44812857	1.98455	1.03697	-0.936437	ENSMUST00000103894	2658	AC159378.1
chr10	59673334	59673946	1.01909	0.518486	-0.974911	ENSMUST00000103902	54	AC155640.1
chr8	18613669	18614366	1.07273	0.259243	-2.04891	ENSMUST00000104099	0	SNORA17
chr9	36828691	36830031	2.68183	1.64187	-0.707875	ENSMUST00000104213	-3953	n-R5s82
chr18	21460088	21460723	0.965458	0.345657	-1.48187	ENSMUST00000104400	0	Y_RNA
chr9	15115751	15116659	1.50182	0.864143	-0.797373	ENSMUST00000104426	-337	SNORA40
chr11	77056155	77056696	0.804548	0.259243	-1.63387	ENSMUST00000104461	1822	SNORD86
chr14	119221273	119222403	1.6091	0.777729	-1.04891	ENSMUST00000104473	3851	n-R5s51
chr2	37257725	37258221	0.750912	0.432071	-0.797373	ENSMUST00000104568	-2049	Snord90
chrX	12450140	12451761	3.3791	1.29621	-1.38234	ENSMUST00000104666	-2653	AL662925.1
chr7	88151484	88152168	0.965458	0.0864143	-3.48187	ENSMUST00000104882	-2150	Zfp592
chr13	21903914	21904466	0.858185	0.345657	-1.31195	ENSMUST00000104941	301	Hist1h4m
chr18	34900212	34900828	1.18	0.6049	-0.964023	ENSMUST00000105038	3193	Gm3550
chr4	88326160	88327241	2.1991	1.29621	-0.762608	ENSMUST00000105147	2576	Ifna2
chr10	126512999	126513962	1.66273	1.03697	-0.68118	ENSMUST00000105254	-2001	Agap2
chr10	88995221	88995967	1.12637	0.345657	-1.70426	ENSMUST00000105297	364	Nr1h4
chr10	81024812	81027266	3.64728	2.33319	-0.644522	ENSMUST00000105318	891	Aes
chr10	80816335	80817057	0.965458	0.518486	-0.896909	ENSMUST00000105323	-3111	Hmg20b
chr10	79851756	79852390	0.911821	0.432071	-1.07748	ENSMUST00000105350	-1353	Mex3d
chr10	79811787	79813207	2.03819	1.2098	-0.752519	ENSMUST00000105352	-631	Adamtsl5
chr10	40607116	40609055	2.73546	1.55546	-0.814447	ENSMUST00000105509	3485	Wasf1
chr10	21883094	21883795	1.07273	0.6049	-0.82652	ENSMUST00000105522	4704	H60b
chr4	154972887	154973637	1.28728	0.518486	-1.31195	ENSMUST00000105608	-1888	Slc35e2
chr4	150501044	150504766	22.0446	13.6535	-0.69116	ENSMUST00000105668	0	Camta1
chr10	80227441	80228356	1.23364	0.777729	-0.665583	ENSMUST00000105760	3377	Gm17151
chr4	130122698	130123418	1.18	0.6049	-0.964023	ENSMUST00000105993	-2287	Nkain1
chr3	84768680	84769011	0.697275	0.345657	-1.01239	ENSMUST00000106034	492	Dear1
chr7	148005659	148006533	1.6091	0.777729	-1.04891	ENSMUST00000106052	1499	Zfp941
chr4	127003890	127004989	1.50182	0.950557	-0.65987	ENSMUST00000106091	1417	Gjb3
chr3	152109337	152110094	1.23364	0.6049	-1.02815	ENSMUST00000106105	0	Zzz3
chr3	146435122	146435909	1.12637	0.432071	-1.38234	ENSMUST00000106140	-958	Prkacb
chr11	117993869	117994568	0.965458	0.172829	-2.48187	ENSMUST00000106308	-3337	Dnahc17
chr4	118533943	118534746	1.23364	0.691314	-0.835508	ENSMUST00000106360	-2517	Olfr1331
chr11	116609015	116609689	1.07273	0.432071	-1.31195	ENSMUST00000106377	1554	Gm11735
chr4	116301545	116302393	1.39455	0.691314	-1.01239	ENSMUST00000106474	-990	Nasp
chr4	115897818	115898868	1.77001	1.03697	-0.771378	ENSMUST00000106490	3519	Pik3r3
chr3	107429813	107430835	1.55546	0.6049	-1.36257	ENSMUST00000106703	-3405	Gm10961
chr4	107508424	107509987	3.70092	2.16036	-0.776615	ENSMUST00000106731	4836	Lrp8
chr4	102093222	102094625	2.62819	1.38263	-0.926656	ENSMUST00000106904	0	Pde4b
chr11	104297755	104298523	1.23364	0.345657	-1.83551	ENSMUST00000106971	4494	1700081L11Rik
chr3	97658525	97659412	1.55546	0.864143	-0.847999	ENSMUST00000107038	-2507	Pde4dip
chr7	99969757	99971115	2.09183	1.29621	-0.690458	ENSMUST00000107179	1329	Rab30
chr7	80881772	80882588	1.12637	0.432071	-1.38234	ENSMUST00000107456	-2605	Fam174b
chr11	97637177	97638097	1.50182	0.950557	-0.65987	ENSMUST00000107576	0	1700001P01Rik
chr7	56560871	56561443	0.804548	0.518486	-0.633875	ENSMUST00000107611	1365	Nav2
chr11	90247374	90248181	1.12637	0.432071	-1.38234	ENSMUST00000107881	1341	Hlf
chr11	84323377	84324429	1.50182	0.950557	-0.65987	ENSMUST00000108085	2575	Aatf
chr11	83937434	83938162	0.965458	0.345657	-1.48187	ENSMUST00000108100	2438	Tada2a
chr3	37621512	37622989	3.3791	1.72829	-0.967298	ENSMUST00000108105	263	Gm5148
chr4	24728338	24729045	1.07273	0.518486	-1.04891	ENSMUST00000108214	-302	Klhl32
chr3	26537752	26538568	1.28728	0.518486	-1.31195	ENSMUST00000108305	1182	Spata16
chr3	19861191	19861963	1.12637	0.691314	-0.704264	ENSMUST00000108325	3909	Cp
chr7	3422733	3423471	1.18	0.6049	-0.964023	ENSMUST00000108647	-1952	Cacng6
chr11	69204033	69204836	1.23364	0.777729	-0.665583	ENSMUST00000108660	4000	Cyb5d1
chr11	60873768	60874648	1.23364	0.518486	-1.25055	ENSMUST00000108717	-4658	Kcnj12
chr11	60029442	60030307	1.55546	0.864143	-0.847999	ENSMUST00000108737	3800	Srebf1
chr15	90390989	90391666	0.965458	0.259243	-1.89691	ENSMUST00000108774	-112	Gm6746
chr15	100782821	100783913	1.87728	0.6049	-1.63387	ENSMUST00000108907	-1916	Scn8a
chr11	51518083	51518883	1.39455	0.6049	-1.20503	ENSMUST00000109094	2998	Sec24a
chr8	118236136	118236738	1.07273	0.432071	-1.31195	ENSMUST00000109104	-4443	Maf
chr11	45869044	45872206	17.3246	9.6784	-0.839982	ENSMUST00000109251	0	Adam19
chr15	85403316	85404551	2.62819	1.46904	-0.839193	ENSMUST00000109424	3950	Wnt7b
chr2	158198462	158199506	1.77001	0.691314	-1.35634	ENSMUST00000109488	-1868	Snhg11
chr15	82847454	82848833	2.57455	1.38263	-0.896909	ENSMUST00000109503	4736	Nfam1
chr2	157276779	157277652	1.23364	0.518486	-1.25055	ENSMUST00000109531	-3755	Src
chr2	156318676	156319344	1.07273	0.345657	-1.63387	ENSMUST00000109572	-295	Epb4.1l1
chr15	80934824	80935467	1.01909	0.345657	-1.55987	ENSMUST00000109579	47	Mkl1
chr11	20237086	20237874	1.07273	0.6049	-0.82652	ENSMUST00000109588	-1000	Gm12033
chr2	155785442	155786143	1.07273	0.432071	-1.31195	ENSMUST00000109618	3114	Cep250
chr2	154374857	154375915	1.98455	1.03697	-0.936437	ENSMUST00000109709	196	1700003F12Rik
chr2	154236131	154237108	2.09183	1.2098	-0.789994	ENSMUST00000109728	-2297	Snta1
chr15	76970719	76972507	2.95001	1.55546	-0.923381	ENSMUST00000109780	2922	Rbfox2
chr12	104658892	104660064	2.62819	1.55546	-0.756731	ENSMUST00000110001	3927	Ddx24
chr13	9382360	9383105	1.12637	0.6049	-0.896909	ENSMUST00000110050	-3280	Gm17294
chr2	136538610	136540802	6.49002	3.45657	-0.908882	ENSMUST00000110098	0	Snap25
chr12	99988608	99990358	2.95001	1.8147	-0.700989	ENSMUST00000110105	3432	Zc3h14
chr15	65648996	65649914	1.55546	0.518486	-1.58496	ENSMUST00000110107	4600	Efr3a
chr8	72668512	72669618	1.77001	0.864143	-1.03441	ENSMUST00000110139	4338	2310045N01Rik
chr2	131780578	131781921	2.95001	1.12339	-1.39287	ENSMUST00000110169	3807	Prnd
chr13	37922900	37924186	2.14546	1.12339	-0.933435	ENSMUST00000110237	3640	Rreb1
chr12	85221745	85222946	1.71637	0.777729	-1.14202	ENSMUST00000110298	-3986	Numb
chr8	48439709	48440480	1.34091	0.864143	-0.633875	ENSMUST00000110367	-2008	Stox2
chr2	126898216	126898779	0.965458	0.345657	-1.48187	ENSMUST00000110389	1789	Blvra
chr15	31386728	31387668	1.34091	0.864143	-0.633875	ENSMUST00000110408	-3285	Ropn1l
chr8	42456387	42457102	1.12637	0.432071	-1.38234	ENSMUST00000110417	2888	Asah1
chr2	122063425	122064044	0.965458	0.518486	-0.896909	ENSMUST00000110551	2942	Sord
chr12	71065903	71066922	1.50182	0.864143	-0.797373	ENSMUST00000110560	1445	Gm3086
chr15	9065086	9065834	1.18	0.6049	-0.964023	ENSMUST00000110585	4374	Skp2
chr5	144659740	144660437	0.911821	0.518486	-0.814447	ENSMUST00000110718	-1187	Ankrd61
chr1	194013843	194014889	1.66273	1.03697	-0.68118	ENSMUST00000110844	0	Kcnh1
chr2	113682181	113683959	2.7891	1.46904	-0.924923	ENSMUST00000110947	4496	Arhgap11a
chr5	138530060	138531049	1.71637	0.950557	-0.852515	ENSMUST00000110962	-2819	Zkscan1
chr2	110785998	110786876	1.34091	0.864143	-0.633875	ENSMUST00000111019	3654	Ano3
chr2	106531884	106532553	1.07273	0.6049	-0.82652	ENSMUST00000111063	-873	Mpped2
chr5	135647421	135648470	1.71637	0.691314	-1.31195	ENSMUST00000111188	3141	Bcl7b
chr1	174416128	174417023	1.34091	0.6049	-1.14845	ENSMUST00000111235	3685	Igsf9
chr1	173174457	173175220	1.23364	0.345657	-1.83551	ENSMUST00000111318	2034	Ndufs2
chr2	91495919	91496657	1.18	0.432071	-1.44945	ENSMUST00000111330	2556	Arhgap1
chr1	173125396	173127020	3.80819	2.24677	-0.761254	ENSMUST00000111332	0	Pcp4l1
chr9	123833584	123834545	1.82364	0.518486	-1.81445	ENSMUST00000111443	-2315	Gm4694
chr6	146898742	146899626	1.23364	0.518486	-1.25055	ENSMUST00000111622	3311	1700034J05Rik
chr9	114470195	114474068	8.85003	5.27127	-0.747531	ENSMUST00000111816	0	Trim71
chr14	47443122	47443811	1.07273	0.259243	-2.04891	ENSMUST00000111817	-1206	Gmfb
chr19	45144327	45144876	0.804548	0.432071	-0.896909	ENSMUST00000111948	-4855	Kazald1
chr1	137952466	137953579	1.71637	1.12339	-0.611507	ENSMUST00000112064	2990	Cacna1s
chr5	115921003	115921643	1.01909	0.345657	-1.55987	ENSMUST00000112071	4724	Pla2g1b
chr6	128087909	128089041	1.66273	0.950557	-0.806711	ENSMUST00000112171	-1183	Tspan9
chrX	163643864	163648323	27.9983	15.2953	-0.872247	ENSMUST00000112175	0	Tmsb4x
chr5	115107877	115108772	1.77001	0.6049	-1.54899	ENSMUST00000112225	0	Trpv4
chr14	31306672	31307160	0.858185	0.432071	-0.990018	ENSMUST00000112250	-2331	Cacna1d
chrX	160683644	160684526	1.23364	0.6049	-1.02815	ENSMUST00000112263	3775	Bmx
chr17	85387871	85388618	1.07273	0.518486	-1.04891	ENSMUST00000112307	-4395	Ppm1b
chr9	107771693	107772307	1.01909	0.6049	-0.752519	ENSMUST00000112323	2788	Rbm6
chr5	113503665	113504316	1.01909	0.6049	-0.752519	ENSMUST00000112336	-4529	Crybb2
chr17	75581086	75581635	0.911821	0.0864143	-3.39941	ENSMUST00000112514	2837	Ltbp1
chr19	29882944	29883855	1.39455	0.6049	-1.20503	ENSMUST00000112564	-3126	9930021J03Rik
chr2	35009836	35010676	1.34091	0.345657	-1.9558	ENSMUST00000113032	2638	Cep110
chr6	112783643	112784241	1.01909	0.6049	-0.752519	ENSMUST00000113171	-4029	Srgap3
chr2	32675403	32676178	1.23364	0.518486	-1.25055	ENSMUST00000113222	-2694	Stxbp1
chrX	117398575	117399260	1.39455	0.691314	-1.01239	ENSMUST00000113358	-4608	Pcdh11x
chrX	111587371	111588184	1.34091	0.864143	-0.633875	ENSMUST00000113370	0	Klhl4
chr19	7183767	7184387	1.01909	0.6049	-0.752519	ENSMUST00000113383	-3549	Flrt1
chr1	82839253	82839891	1.07273	0.518486	-1.04891	ENSMUST00000113444	3197	Agfg1
chr1	77507580	77508232	0.965458	0.259243	-1.89691	ENSMUST00000113540	3432	Epha4
chr1	75445416	75446528	1.66273	0.518486	-1.68118	ENSMUST00000113577	-483	Accn4
chr6	88671859	88672792	1.6091	0.864143	-0.896909	ENSMUST00000113585	-1614	Mgll
chr2	30691088	30691737	1.01909	0.432071	-1.23795	ENSMUST00000113592	598	Prrx2
chrX	99277505	99278406	1.34091	0.864143	-0.633875	ENSMUST00000113628	4480	Nhsl2
chr1	74723888	74724691	1.18	0.172829	-2.77138	ENSMUST00000113678	-781	Ttll4
chr16	96578019	96579078	1.77001	0.518486	-1.77138	ENSMUST00000113794	-4197	Igsf5
chr2	29622044	29622942	1.44819	0.777729	-0.896909	ENSMUST00000113808	4963	Gm13547
chr2	28512487	28513221	1.18	0.345657	-1.77138	ENSMUST00000113870	-866	Tsc1
chr12	67570807	67572582	4.3982	2.33319	-0.914611	ENSMUST00000113942	0	Mdga2
chr19	3578281	3578830	0.965458	0.172829	-2.48187	ENSMUST00000113997	-2533	Ppp6r3
chr1	66411631	66412461	1.23364	0.777729	-0.665583	ENSMUST00000114012	401	Mtap2
chr6	50316196	50317429	2.30637	1.29621	-0.831321	ENSMUST00000114466	2786	Osbpl3
chr6	49271937	49273384	2.25273	0.950557	-1.24483	ENSMUST00000114491	2633	Ccdc126
chr9	45634480	45635260	1.18	0.691314	-0.771378	ENSMUST00000114628	1462	Cep164
chr2	19120154	19121537	3.64728	2.33319	-0.644522	ENSMUST00000114640	0	Armc3
chr16	44026406	44027044	1.01909	0.259243	-1.97491	ENSMUST00000114677	1015	Gramd1c
chr5	24690258	24690890	0.858185	0.345657	-1.31195	ENSMUST00000114965	2940	Galntl5
chrX	45314157	45314630	0.750912	0.345657	-1.1193	ENSMUST00000115013	693	Ocrl
chr16	33793119	33793893	1.34091	0.518486	-1.37084	ENSMUST00000115044	-230	Muc13
chr18	65856659	65858583	4.34456	1.55546	-1.48187	ENSMUST00000115097	0	5330437I02Rik
chr16	32433752	32434529	1.07273	0.345657	-1.63387	ENSMUST00000115140	2438	Pcyt1a
chr16	31751112	31751735	0.858185	0.172829	-2.31195	ENSMUST00000115196	-2701	Dlg1
chrX	22858918	22863215	15.6619	9.24633	-0.760304	ENSMUST00000115317	0	Klhl13
chr9	21811221	21812201	1.44819	0.864143	-0.744906	ENSMUST00000115331	3744	Prkcsh
chr6	25636169	25636777	0.965458	0.518486	-0.896909	ENSMUST00000115332	3953	Gpr37
chr1	16068753	16069449	1.07273	0.345657	-1.63387	ENSMUST00000115367	1845	4930444P10Rik
chr9	21189478	21190774	2.1991	1.03697	-1.08454	ENSMUST00000115413	-1782	Ilf3
chr1	9619193	9620481	3.80819	1.8147	-1.06938	ENSMUST00000115480	693	2610203C22Rik
chr6	8138730	8140007	1.66273	0.518486	-1.68118	ENSMUST00000115537	2611	Col28a1
chr18	38159410	38160096	1.07273	0.432071	-1.31195	ENSMUST00000115603	-2183	Arap3
chr18	37164532	37165451	1.50182	0.518486	-1.53434	ENSMUST00000115658	0	Pcdha1
chr9	4305431	4306065	1.01909	0.259243	-1.97491	ENSMUST00000115732	3395	Aasdhppt
chr16	14161449	14162064	1.01909	0.6049	-0.752519	ENSMUST00000115794	-1304	Nde1
chr18	15559202	15563774	18.1828	9.76481	-0.896909	ENSMUST00000115856	0	Aqp4
chr18	11818872	11819423	0.965458	0.518486	-0.896909	ENSMUST00000115861	2523	Rbbp8
chr18	7622402	7622959	0.911821	0.345657	-1.39941	ENSMUST00000115869	3903	Mpp7
chr1	148571418	148572097	1.39455	0.691314	-1.01239	ENSMUST00000116191	-614	Gm15583
chr11	66860419	66861973	2.14546	0.864143	-1.31195	ENSMUST00000116363	4100	2310004I24Rik
chr2	155289130	155289884	1.01909	0.6049	-0.752519	ENSMUST00000116491	-2503	Gm14239
chr11	52049869	52050623	1.01909	0.259243	-1.97491	ENSMUST00000116595	0	Skp1a
chr1	128367572	128368231	1.07273	0.6049	-0.82652	ENSMUST00000116695	-2772	AC164156.1
chr4	11877978	11878576	0.965458	0.518486	-0.896909	ENSMUST00000116709	1946	AL772167.1
chr10	60420600	60421266	1.12637	0.6049	-0.896909	ENSMUST00000116876	-2205	Mir466j
chr8	32216740	32217743	1.87728	1.03697	-0.856267	ENSMUST00000116885	-3227	Mir1186
chr8	105014683	105015202	0.858185	0.259243	-1.72698	ENSMUST00000116899	-3493	AC105256.1
chr10	6918468	6919274	1.44819	0.777729	-0.896909	ENSMUST00000117005	2245	AC155833.1
chr11	35813283	35813982	1.18	0.6049	-0.964023	ENSMUST00000117261	3729	Gm12125
chr5	33489069	33489879	1.18	0.6049	-0.964023	ENSMUST00000117311	-3994	5033423K11Rik
chr17	24502235	24502688	0.804548	0.345657	-1.21884	ENSMUST00000117337	810	Abca3
chr3	94842450	94843279	1.28728	0.691314	-0.896909	ENSMUST00000117355	3187	Psmd4
chr5	3888275	3889201	1.23364	0.6049	-1.02815	ENSMUST00000117463	4707	Mterf
chr2	23366405	23367126	1.12637	0.518486	-1.1193	ENSMUST00000117500	2027	Gm13331
chr9	115952019	115952549	0.965458	0.345657	-1.48187	ENSMUST00000117563	-1838	Gm9385
chrX	100726801	100728147	2.36001	1.12339	-1.07094	ENSMUST00000117673	1981	Gm9157
chr5	108276413	108277476	1.71637	0.950557	-0.852515	ENSMUST00000117837	3006	Gm16007
chr4	126726487	126727180	1.01909	0.345657	-1.55987	ENSMUST00000117934	2862	Gm12941
chr7	88051533	88052788	1.77001	0.950557	-0.896909	ENSMUST00000118004	0	Gm16171
chr11	69765003	69766185	2.09183	1.29621	-0.690458	ENSMUST00000118013	705	Gm12310
chr14	31620308	31621233	1.6091	0.864143	-0.896909	ENSMUST00000118107	2745	Gm15667
chr7	99789262	99790181	1.34091	0.777729	-0.785878	ENSMUST00000118157	-3611	Ankrd42
chr4	129779015	129779758	1.12637	0.6049	-0.896909	ENSMUST00000118199	-44	Pef1
chr3	103597295	103598257	1.39455	0.777729	-0.842461	ENSMUST00000118317	-1810	Hipk1
chr11	60258087	60258719	0.965458	0.259243	-1.89691	ENSMUST00000118398	-1526	Gm12268
chr3	28983225	28984265	1.98455	1.12339	-0.82096	ENSMUST00000118531	1534	Egfem1
chr5	141742308	141742794	0.750912	0.259243	-1.53434	ENSMUST00000118634	1616	Gm6433
chr4	15897851	15898453	0.965458	0.518486	-0.896909	ENSMUST00000118701	-777	Gm11869
chr2	162726037	162726775	1.28728	0.432071	-1.57498	ENSMUST00000118946	-779	Gm11451
chr8	126380293	126380811	0.750912	0.259243	-1.53434	ENSMUST00000118982	2566	Gm4342
chr2	78866676	78867394	1.07273	0.259243	-2.04891	ENSMUST00000119028	-3249	Gm14466
chr11	78401817	78402518	1.01909	0.172829	-2.55987	ENSMUST00000119052	-2761	Gm11196
chr12	109682296	109682984	1.12637	0.345657	-1.70426	ENSMUST00000119205	-2817	Gm15636
chr11	97926714	97927307	0.911821	0.518486	-0.814447	ENSMUST00000119220	1514	Gm11631
chr4	15937783	15938573	1.23364	0.691314	-0.835508	ENSMUST00000119255	901	Gm11870
chr2	38799744	38800377	1.07273	0.6049	-0.82652	ENSMUST00000119289	4883	Gm13473
chr19	40910078	40910792	1.07273	0.6049	-0.82652	ENSMUST00000119316	4282	Ccnj
chr11	107186334	107188685	4.07638	2.07394	-0.974911	ENSMUST00000119399	-3337	Gm11719
chr2	131666561	131667807	1.77001	0.864143	-1.03441	ENSMUST00000119484	3525	Gm14282
chr10	6349898	6350984	1.39455	0.345657	-2.01239	ENSMUST00000119524	3187	Gm16074
chr11	101338356	101339168	1.44819	0.432071	-1.74491	ENSMUST00000119535	818	Gm11625
chr19	4852771	4853407	0.858185	0.518486	-0.726984	ENSMUST00000119694	-1722	Ctsf
chr4	115329525	115330766	2.25273	0.950557	-1.24483	ENSMUST00000119777	4533	Gm12848
chr11	4005414	4006355	1.18	0.691314	-0.771378	ENSMUST00000119801	-1403	Gm11955
chr2	34418400	34419430	2.1991	1.38263	-0.669498	ENSMUST00000119822	-1089	Gm13408
chr4	124394384	124394945	1.07273	0.6049	-0.82652	ENSMUST00000119850	-1298	Gm12917
chr4	147405798	147406584	1.18	0.691314	-0.771378	ENSMUST00000119862	137	Gm13207
chr7	107729511	107730047	0.858185	0.518486	-0.726984	ENSMUST00000119872	732	Gm15683
chr4	142745804	142746593	1.34091	0.864143	-0.633875	ENSMUST00000119886	3331	Gm13038
chr4	32977766	32978650	1.28728	0.777729	-0.726984	ENSMUST00000119904	-1011	Gm11941
chr11	53548259	53548933	1.01909	0.518486	-0.974911	ENSMUST00000119924	1180	Gm12213
chr8	73928956	73931619	11.3173	7.34521	-0.623655	ENSMUST00000119976	0	Ankle1
chr7	134038797	134039584	1.12637	0.6049	-0.896909	ENSMUST00000120007	1355	Tmem219
chr1	61254455	61255463	1.50182	0.950557	-0.65987	ENSMUST00000120063	-370	Gm11591
chr4	11072780	11073441	1.01909	0.259243	-1.97491	ENSMUST00000120175	925	Gm11830
chr10	75259076	75261868	14.1064	9.24633	-0.609398	ENSMUST00000120177	0	Gstt1
chr3	101040989	101041789	1.28728	0.6049	-1.08955	ENSMUST00000120257	3608	Gm12487
chr11	88251799	88252827	1.44819	0.691314	-1.06683	ENSMUST00000120278	-4784	Gm11510
chr16	32882167	32882832	1.23364	0.518486	-1.25055	ENSMUST00000120345	-236	Fyttd1
chr2	50375682	50376278	1.01909	0.259243	-1.97491	ENSMUST00000120419	1103	Gm13488
chr11	69441982	69442864	1.71637	0.777729	-1.14202	ENSMUST00000120440	1951	Gm12308
chr1	181468502	181469252	1.23364	0.345657	-1.83551	ENSMUST00000120442	0	Gm15480
chrX	39696731	39697743	2.09183	1.03697	-1.01239	ENSMUST00000120480	-2946	Gm14619
chr11	54564054	54565646	2.89637	1.8147	-0.674516	ENSMUST00000120487	-3729	Gm12229
chr17	27657142	27658327	2.03819	1.29621	-0.652983	ENSMUST00000120515	-1191	Gm16005
chr4	41076268	41077274	1.82364	0.691314	-1.39941	ENSMUST00000120536	2604	Gm12402
chr2	103675146	103675786	0.858185	0.518486	-0.726984	ENSMUST00000120614	1889	Gm13877
chr1	63722983	63723436	0.750912	0.259243	-1.53434	ENSMUST00000120763	4943	Gm12748
chr11	3050634	3051784	2.57455	1.46904	-0.809446	ENSMUST00000120853	0	Gm11400
chr2	181457737	181458356	0.858185	0.518486	-0.726984	ENSMUST00000120868	1292	Gm14489
chrX	54908547	54909350	1.34091	0.691314	-0.955803	ENSMUST00000120893	-3559	Gm5389
chr5	33208200	33209353	1.71637	0.950557	-0.852515	ENSMUST00000120902	966	Depdc5
chr2	34824932	34826477	2.89637	1.55546	-0.896909	ENSMUST00000121107	-4509	Gm13450
chrX	13072371	13073981	2.14546	1.38263	-0.633875	ENSMUST00000121165	-4213	Gm14506
chr9	35369294	35370264	1.6091	0.864143	-0.896909	ENSMUST00000121246	2245	Pus3
chr9	40157284	40158102	1.6091	0.950557	-0.759405	ENSMUST00000121357	-3410	Gramd1b
chr4	41112141	41114100	4.02274	2.59243	-0.633875	ENSMUST00000121384	-1587	Gm12403
chr12	52451090	52452486	2.84274	1.2098	-1.23251	ENSMUST00000121521	1733	G2e3
chr13	21999057	21999684	1.12637	0.6049	-0.896909	ENSMUST00000121524	4034	Gm11279
chr1	153854872	153855630	1.34091	0.777729	-0.785878	ENSMUST00000121533	-976	1700025G04Rik
chr2	24529161	24530065	1.18	0.518486	-1.18642	ENSMUST00000121558	-156	Gm13459
chr2	119496337	119496934	1.07273	0.518486	-1.04891	ENSMUST00000121637	1444	Gm14383
chr4	123110100	123110850	1.18	0.691314	-0.771378	ENSMUST00000121747	-2010	Gm12924
chr11	97271821	97272684	1.39455	0.345657	-2.01239	ENSMUST00000121799	-4163	Arhgap23
chr11	111905207	111906042	1.34091	0.691314	-0.955803	ENSMUST00000121830	-316	Gm11679
chr4	100879006	100879594	0.965458	0.518486	-0.896909	ENSMUST00000122052	3599	Gm12785
chr18	12462962	12464820	6.7582	4.2343	-0.674516	ENSMUST00000122408	0	Ankrd29
chr11	98129332	98130475	1.55546	0.950557	-0.710496	ENSMUST00000122508	4206	n-R5s73
chr18	6486146	6486774	1.01909	0.345657	-1.55987	ENSMUST00000122565	3871	Mir1893
chr9	62360657	62362753	3.80819	2.24677	-0.761254	ENSMUST00000122591	-83	n-R5s84
chr8	26716454	26717496	1.82364	0.950557	-0.939978	ENSMUST00000122594	3535	SNORA33
chr13	21538299	21539099	1.23364	0.6049	-1.02815	ENSMUST00000122641	1272	Mir1896
chr8	74556387	74556813	0.697275	0.259243	-1.42742	ENSMUST00000122661	-4728	U2
chr13	110697054	110697810	1.39455	0.518486	-1.42742	ENSMUST00000122702	3039	Mir1904
chr3	88341567	88344475	6.22184	3.80223	-0.710496	ENSMUST00000122779	-1264	Mir1905
chr4	140577007	140578002	1.6091	0.950557	-0.759405	ENSMUST00000122846	38	Crocc
chr9	45928390	45929328	1.55546	0.777729	-1	ENSMUST00000122865	-1992	Sik3
chr6	39356925	39357427	0.750912	0.172829	-2.1193	ENSMUST00000122874	-1846	Mkrn1
chr5	23339368	23340105	1.07273	0.518486	-1.04891	ENSMUST00000122963	-1654	4933427G23Rik
chr10	39307550	39308467	2.09183	1.12339	-0.896909	ENSMUST00000122987	0	Gm16365
chrX	11704625	11705636	1.93092	1.2098	-0.674516	ENSMUST00000123004	0	Bcor
chr7	28034410	28035628	1.6091	0.950557	-0.759405	ENSMUST00000123012	0	Adck4
chrX	68808342	68811295	11.21	4.92561	-1.18642	ENSMUST00000123100	0	Hmgb3
chrX	7672587	7673503	2.73546	1.29621	-1.07748	ENSMUST00000123120	-710	Gm6787
chr13	108953251	108953908	1.01909	0.345657	-1.55987	ENSMUST00000123138	4255	Ercc8
chr7	125865284	125866162	1.34091	0.777729	-0.785878	ENSMUST00000123178	157	6330503K22Rik
chr7	119645651	119646243	0.858185	0.345657	-1.31195	ENSMUST00000123185	962	Parva
chr19	6135492	6136198	1.34091	0.6049	-1.14845	ENSMUST00000123193	1963	Arl2
chr1	148688350	148688969	1.01909	0.6049	-0.752519	ENSMUST00000123231	0	Gm15584
chr6	147034066	147034815	1.01909	0.345657	-1.55987	ENSMUST00000123367	709	Gm5887
chr10	72560968	72563171	5.52456	3.19733	-0.788994	ENSMUST00000123398	0	Pcdh15
chr6	114818424	114821083	4.72002	1.64187	-1.52345	ENSMUST00000123478	-3650	Vgll4
chr5	100964427	100965991	2.36001	1.12339	-1.07094	ENSMUST00000123559	3168	Cops4
chr2	125042606	125043575	1.55546	0.777729	-1	ENSMUST00000123574	0	Gm14002
chr11	86414669	86415124	0.804548	0.432071	-0.896909	ENSMUST00000123590	642	Vmp1
chr2	73160761	73161447	1.01909	0.259243	-1.97491	ENSMUST00000123621	3306	Scrn3
chr7	4661917	4662903	1.55546	0.6049	-1.36257	ENSMUST00000123637	1339	Brsk1
chr1	72288043	72288694	0.911821	0.518486	-0.814447	ENSMUST00000123654	-1901	D230017M19Rik
chr11	98546606	98547488	1.34091	0.864143	-0.633875	ENSMUST00000123676	-1613	Psmd3
chr9	54290399	54291104	1.01909	0.259243	-1.97491	ENSMUST00000123709	2124	Dmxl2
chr11	80205764	80206396	1.12637	0.6049	-0.896909	ENSMUST00000123726	3133	Zfp207
chr15	37357012	37361144	10.9419	6.91314	-0.662444	ENSMUST00000123777	0	Gm15941
chr18	57722146	57723089	1.71637	1.03697	-0.726984	ENSMUST00000123872	0	1700011I03Rik
chr11	100249726	100250477	1.34091	0.6049	-1.14845	ENSMUST00000123903	-1643	Jup
chr11	23489706	23490659	1.50182	0.691314	-1.1193	ENSMUST00000123909	4751	0610010F05Rik
chr5	136672908	136673537	0.965458	0.518486	-0.896909	ENSMUST00000123921	156	Prkrip1
chr11	59594772	59595551	1.12637	0.691314	-0.704264	ENSMUST00000123949	-950	Gm12264
chr15	98734512	98735314	1.18	0.518486	-1.18642	ENSMUST00000123950	4055	Lmbr1l
chr7	107783742	107784945	1.77001	0.6049	-1.54899	ENSMUST00000123960	882	Rab6
chr17	35049151	35049809	0.965458	0.6049	-0.674516	ENSMUST00000124002	1233	Ehmt2
chr4	63151064	63152040	1.39455	0.777729	-0.842461	ENSMUST00000124016	2595	Whrn
chr11	98617294	98618246	1.23364	0.777729	-0.665583	ENSMUST00000124072	2396	Thra
chr8	86485423	86486409	1.71637	0.777729	-1.14202	ENSMUST00000124174	-2537	Asf1b
chr9	97002589	97003316	1.23364	0.518486	-1.25055	ENSMUST00000124250	-1951	Slc25a36
chr5	35227736	35228255	0.858185	0.259243	-1.72698	ENSMUST00000124272	-845	Htt
chr9	83291267	83292022	1.01909	0.259243	-1.97491	ENSMUST00000124296	3455	Lca5
chr17	66403582	66404231	1.12637	0.518486	-1.1193	ENSMUST00000124297	-3603	Ankrd12
chr10	57867307	57868299	1.39455	0.777729	-0.842461	ENSMUST00000124312	-2506	Lims1
chr7	151012111	151012821	1.01909	0.432071	-1.23795	ENSMUST00000124340	-2710	Dhcr7
chr17	4989935	4991454	2.30637	1.12339	-1.03777	ENSMUST00000124362	-2878	Arid1b
chr12	108193843	108195345	2.41364	1.29621	-0.896909	ENSMUST00000124395	0	Gm16087
chr10	80948714	80949751	1.50182	0.432071	-1.79737	ENSMUST00000124437	1212	Ncln
chrX	166428650	166436321	30.6265	10.7154	-1.5151	ENSMUST00000124513	-3780	Gm15247
chr7	129162367	129163027	1.18	0.518486	-1.18642	ENSMUST00000124566	1655	Gga2
chr5	125759051	125760353	1.98455	1.2098	-0.714045	ENSMUST00000124582	4177	Scarb1
chr5	108244533	108245237	1.12637	0.345657	-1.70426	ENSMUST00000124590	592	Evi5
chr7	108553841	108554644	1.12637	0.691314	-0.704264	ENSMUST00000124637	-1759	Arap1
chr13	101255548	101256357	1.39455	0.6049	-1.20503	ENSMUST00000124644	-3945	Gtf2h2
chr2	60192931	60193778	1.28728	0.777729	-0.726984	ENSMUST00000124654	0	Gm13571
chr11	116055287	116056270	1.66273	0.950557	-0.806711	ENSMUST00000124684	3774	Acox1
chr3	27040048	27040717	1.07273	0.6049	-0.82652	ENSMUST00000124727	-3991	Ect2
chr3	90263977	90264613	0.911821	0.345657	-1.39941	ENSMUST00000124760	731	Npr1
chr13	21277094	21277898	1.39455	0.518486	-1.42742	ENSMUST00000124794	-3832	Trim27
chr11	117275857	117277277	2.57455	1.38263	-0.896909	ENSMUST00000124901	156	Gm11729
chr17	29309016	29309534	0.804548	0.259243	-1.63387	ENSMUST00000124917	4095	Cpne5
chr9	66314545	66315155	1.55546	0.691314	-1.16993	ENSMUST00000124969	-1273	Herc1
chr15	97578621	97579954	2.41364	1.55546	-0.633875	ENSMUST00000125002	0	Rapgef3
chr1	163067707	163068313	0.911821	0.345657	-1.39941	ENSMUST00000125018	-4509	Ankrd45
chr8	90771845	90773080	1.66273	0.864143	-0.944215	ENSMUST00000125043	2663	Papd5
chr7	20374715	20376465	4.66638	2.67884	-0.800694	ENSMUST00000125050	-308	Cblc
chr10	57517981	57518665	1.01909	0.259243	-1.97491	ENSMUST00000125076	3609	Smpdl3a
chr16	4717875	4720238	13.1946	8.4686	-0.639751	ENSMUST00000125140	0	Nmral1
chr2	115336579	115341813	17.1101	9.33274	-0.874472	ENSMUST00000125147	0	3110099E03Rik
chr16	42275797	42278168	4.61274	1.8147	-1.34589	ENSMUST00000125187	0	Gap43
chr5	125052485	125053116	0.911821	0.259243	-1.81445	ENSMUST00000125191	3686	Tctn2
chr16	94731889	94732772	1.6091	1.03697	-0.633875	ENSMUST00000125229	0	Dscr3
chr5	114814494	114815465	1.55546	0.691314	-1.16993	ENSMUST00000125230	1072	Gm13789
chr11	116324463	116325500	1.87728	0.950557	-0.981798	ENSMUST00000125269	-2133	Gm11739
chr4	80974280	80974887	1.01909	0.6049	-0.752519	ENSMUST00000125288	4059	Mpdz
chr11	88003904	88004521	0.965458	0.259243	-1.89691	ENSMUST00000125297	2583	Cuedc1
chr11	21473390	21474175	1.34091	0.6049	-1.14845	ENSMUST00000125302	-1021	Mdh1
chr5	111137848	111139124	1.98455	0.950557	-1.06197	ENSMUST00000125325	-887	Ep400
chr9	108911948	108912864	1.34091	0.864143	-0.633875	ENSMUST00000125336	-367	Pfkfb4
chr8	74129384	74130013	1.07273	0.6049	-0.82652	ENSMUST00000125339	526	Fam129c
chr12	4880531	4881977	3.05728	1.98753	-0.621274	ENSMUST00000125344	0	Mfsd2b
chr13	28972110	28978170	35.6683	16.4187	-1.1193	ENSMUST00000125358	0	2610307P16Rik
chr3	75755499	75756635	1.6091	0.777729	-1.04891	ENSMUST00000125405	3938	Golim4
chr6	148151004	148151783	1.18	0.518486	-1.18642	ENSMUST00000125469	0	Ergic2
chr16	90938997	90940345	1.77001	0.6049	-1.54899	ENSMUST00000125519	-3826	1110004E09Rik
chr11	82448402	82449674	1.6091	0.864143	-0.896909	ENSMUST00000125600	1549	Gm11426
chr10	79858051	79859198	1.98455	1.12339	-0.82096	ENSMUST00000125618	0	Mbd3
chr5	21238056	21238944	1.55546	0.864143	-0.847999	ENSMUST00000125693	-4015	Pmpcb
chr4	108499868	108500622	1.07273	0.6049	-0.82652	ENSMUST00000125707	-1084	Btf3l4
chr2	24492969	24493991	1.71637	0.864143	-0.990018	ENSMUST00000125798	0	Cacna1b
chr2	119855147	119855913	1.28728	0.6049	-1.08955	ENSMUST00000125805	-1671	Pla2g4b
chr11	115349655	115350351	1.07273	0.432071	-1.31195	ENSMUST00000125940	2166	Nt5c
chr10	19589576	19590414	1.6091	0.777729	-1.04891	ENSMUST00000125942	-97	Pex7
chr6	96062740	96063947	2.14546	1.12339	-0.933435	ENSMUST00000125951	0	Fam19a1
chr11	88582476	88583450	1.44819	0.864143	-0.744906	ENSMUST00000125967	675	C030037D09Rik
chr11	16772623	16773306	1.07273	0.691314	-0.633875	ENSMUST00000125984	-4847	Egfr
chr2	92247775	92248532	1.23364	0.345657	-1.83551	ENSMUST00000126002	-517	D930015M05Rik
chr7	52729681	52731208	2.03819	1.29621	-0.652983	ENSMUST00000126050	4094	Dhdh
chr2	129057915	129058743	1.44819	0.777729	-0.896909	ENSMUST00000126080	-1601	9830144P21Rik
chr5	138217368	138217995	1.23364	0.691314	-0.835508	ENSMUST00000126126	-2082	2010007H12Rik
chr7	149672880	149673846	1.87728	1.03697	-0.856267	ENSMUST00000126149	-1076	Lsp1
chr4	47368048	47368861	1.34091	0.864143	-0.633875	ENSMUST00000126171	1568	Tgfbr1
chr7	146405715	146406486	1.28728	0.518486	-1.31195	ENSMUST00000126199	-24	Lrrc27
chr11	102237393	102238222	1.28728	0.432071	-1.57498	ENSMUST00000126237	113	Gm11616
chr11	61297620	61299165	3.43274	1.64187	-1.06402	ENSMUST00000126308	0	Mfap4
chr7	86534088	86534718	0.965458	0.518486	-0.896909	ENSMUST00000126456	-2097	Fanci
chr4	126241698	126242692	1.71637	1.12339	-0.611507	ENSMUST00000126512	-1107	Clspn
chr7	107636373	107638147	4.77365	2.85167	-0.743286	ENSMUST00000126534	-3699	Ucp2
chr5	22999869	23000466	0.858185	0.518486	-0.726984	ENSMUST00000126586	856	Mll5
chr1	148651626	148653108	3.48638	0.172829	-4.33431	ENSMUST00000126596	45	A230059L01Rik
chr1	25285158	25286282	1.82364	0.864143	-1.07748	ENSMUST00000126626	0	Bai3
chr11	82658437	82659927	4.02274	2.59243	-0.633875	ENSMUST00000126660	0	Rffl
chr2	68201851	68204009	3.64728	2.07394	-0.814447	ENSMUST00000126663	568	Stk39
chr2	84344041	84345515	3.70092	0.950557	-1.96104	ENSMUST00000126679	1516	Gm13710
chr2	164850925	164852566	2.14546	0.950557	-1.17444	ENSMUST00000126685	-2213	Ncoa5
chr7	36429233	36430283	1.55546	0.950557	-0.710496	ENSMUST00000126734	-360	Pdcd5
chr2	59038958	59039538	0.804548	0.518486	-0.633875	ENSMUST00000126749	129	Pkp4
chr4	125941095	125942130	1.77001	0.950557	-0.896909	ENSMUST00000126786	1453	Trappc3
chr11	78097407	78097982	0.858185	0.518486	-0.726984	ENSMUST00000126928	-931	2610507B11Rik
chr19	57072787	57074228	2.41364	0.950557	-1.34437	ENSMUST00000126964	1309	Afap1l2
chr17	6110435	6111189	1.12637	0.691314	-0.704264	ENSMUST00000126982	3037	Tulp4
chr11	90506956	90507514	0.965458	0.518486	-0.896909	ENSMUST00000127034	3730	Tom1l1
chr1	190771696	190772631	1.6091	1.03697	-0.633875	ENSMUST00000127077	-4992	Ush2a
chr14	27260621	27261381	1.07273	0.432071	-1.31195	ENSMUST00000127078	761	Slmap
chr14	103488080	103489013	1.39455	0.864143	-0.690458	ENSMUST00000127113	22	Fbxl3
chr3	145471761	145472669	1.50182	0.6049	-1.31195	ENSMUST00000127193	-774	Ddah1
chr1	88491025	88492316	1.82364	1.12339	-0.69897	ENSMUST00000127219	-999	Cops7b
chr2	49596924	49597576	0.965458	0.345657	-1.48187	ENSMUST00000127245	-2469	Kif5c
chr19	40798936	40800232	2.09183	0.950557	-1.13792	ENSMUST00000127268	-308	Entpd1
chr6	17855335	17856463	1.55546	0.950557	-0.710496	ENSMUST00000127322	0	St7
chr6	92889458	92890055	1.01909	0.6049	-0.752519	ENSMUST00000127336	-308	9530026P05Rik
chr15	94413411	94414251	1.12637	0.518486	-1.1193	ENSMUST00000127347	-1595	Twf1
chr2	118423323	118427539	14.4819	7.60446	-0.92933	ENSMUST00000127356	0	Bub1b
chr10	80557101	80558022	1.44819	0.950557	-0.607402	ENSMUST00000127374	-1782	Creb3l3
chr17	29467089	29468015	1.50182	0.691314	-1.1193	ENSMUST00000127423	2936	Mtch1
chr7	114647955	114648664	1.07273	0.345657	-1.63387	ENSMUST00000127444	347	Syt9
chr3	33705046	33705810	1.12637	0.432071	-1.38234	ENSMUST00000127513	4912	Ttc14
chr8	27271507	27272870	2.36001	1.29621	-0.864487	ENSMUST00000127536	2782	Thap1
chr2	30673450	30674520	1.71637	0.691314	-1.31195	ENSMUST00000127566	0	Mettl11a
chr11	97692914	97693578	1.07273	0.259243	-2.04891	ENSMUST00000127575	-919	Lasp1
chr1	108686784	108687665	1.39455	0.345657	-2.01239	ENSMUST00000127606	-259	Vps4b
chr6	87855988	87856598	1.01909	0.6049	-0.752519	ENSMUST00000127614	-2168	Copg
chr4	154370658	154371394	1.28728	0.691314	-0.896909	ENSMUST00000127661	-390	Plch2
chr5	31344021	31344940	1.50182	0.777729	-0.949376	ENSMUST00000127693	39	Slc5a6
chr4	118960300	118961278	1.50182	0.864143	-0.797373	ENSMUST00000127737	-4904	Ybx1
chr6	72508407	72509671	2.41364	1.55546	-0.633875	ENSMUST00000127770	2436	Capg
chrX	100678830	100680326	2.84274	1.72829	-0.717939	ENSMUST00000127786	-275	Xist
chr11	106114907	106115669	1.23364	0.691314	-0.835508	ENSMUST00000127803	0	Ftsj3
chr2	69497761	69498336	0.804548	0.345657	-1.21884	ENSMUST00000127806	2717	Bbs5
chr11	100904279	100905312	1.77001	1.12339	-0.655901	ENSMUST00000127810	0	Atp6v0a1
chr11	103730602	103731439	1.23364	0.691314	-0.835508	ENSMUST00000127813	2076	Nsf
chr2	101980705	101981266	0.858185	0.259243	-1.72698	ENSMUST00000127888	-2430	Ldlrad3
chr4	106755583	106756057	0.804548	0.345657	-1.21884	ENSMUST00000127916	1987	Cyb5rl
chr14	56369609	56370435	1.12637	0.6049	-0.896909	ENSMUST00000127922	789	2610027L16Rik
chr2	155918622	155919574	1.44819	0.6049	-1.25948	ENSMUST00000127956	4248	Cpne1
chr2	172188983	172189699	0.965458	0.518486	-0.896909	ENSMUST00000128004	-353	Aurka
chr4	108232289	108232973	1.07273	0.432071	-1.31195	ENSMUST00000128042	3950	Zcchc11
chr5	31993178	31993933	1.01909	0.0864143	-3.55987	ENSMUST00000128047	-4713	Rbks
chr11	98258309	98259006	1.07273	0.345657	-1.63387	ENSMUST00000128058	2723	Pgap3
chr18	78016193	78016721	0.804548	0.518486	-0.633875	ENSMUST00000128073	-973	Atp5a1
chr13	112657867	112658430	0.965458	0.6049	-0.674516	ENSMUST00000128198	0	Gm15326
chr18	56933764	56934893	2.09183	0.691314	-1.59735	ENSMUST00000128240	4395	Gm15345
chr16	32622993	32623872	1.6091	0.864143	-0.896909	ENSMUST00000128285	-656	Tfrc
chr1	87487355	87488258	1.55546	0.864143	-0.847999	ENSMUST00000128339	-1590	Sp110
chr3	84497505	84498612	1.66273	0.950557	-0.806711	ENSMUST00000128344	3362	Tmem154
chr15	78600490	78602389	4.3982	2.33319	-0.914611	ENSMUST00000128389	0	Mfng
chr1	36652249	36653970	3.11092	1.12339	-1.46949	ENSMUST00000128412	-2073	Fam178b
chr2	30278514	30279462	1.6091	0.6049	-1.41148	ENSMUST00000128516	-4412	Ppp2r4
chr5	140581754	140582654	1.44819	0.691314	-1.06683	ENSMUST00000128520	4603	Gm16121
chr6	18802150	18802968	1.23364	0.691314	-0.835508	ENSMUST00000128526	3496	Naa38
chr2	150832102	150833003	1.23364	0.259243	-2.25055	ENSMUST00000128564	2066	Ninl
chr5	115529760	115530470	1.07273	0.432071	-1.31195	ENSMUST00000128590	-1790	Sppl3
chr4	56237308	56238405	1.87728	0.864143	-1.1193	ENSMUST00000128591	0	2310081O03Rik
chr4	131423020	131424674	2.7891	1.72829	-0.690458	ENSMUST00000128607	2329	Mecr
chr2	43916474	43917001	0.911821	0.259243	-1.81445	ENSMUST00000128630	-3560	Arhgap15
chr9	65530596	65532347	3.05728	1.90111	-0.685405	ENSMUST00000128664	-3266	Oaz2
chr11	3581276	3582098	1.18	0.518486	-1.18642	ENSMUST00000128666	913	Morc2a
chr2	28399528	28400025	0.858185	0.432071	-0.990018	ENSMUST00000128680	-788	Ralgds
chr2	160406358	160407054	1.23364	0.432071	-1.51358	ENSMUST00000128681	-2039	Gm14222
chr19	3847225	3848182	1.50182	0.777729	-0.949376	ENSMUST00000128694	-3591	Chka
chr12	101150940	101151458	0.911821	0.259243	-1.81445	ENSMUST00000128739	-758	Tdp1
chr2	21013142	21013947	1.39455	0.691314	-1.01239	ENSMUST00000128743	-4779	Gm13376
chr6	88856240	88856983	1.44819	0.6049	-1.25948	ENSMUST00000128790	207	Tpra1
chr11	3429494	3430402	1.44819	0.691314	-1.06683	ENSMUST00000128806	0	Gm11946
chr13	74146265	74148673	8.3673	5.18486	-0.690458	ENSMUST00000128914	0	Gm15912
chr5	115735155	115735882	1.01909	0.6049	-0.752519	ENSMUST00000129024	1500	Coq5
chr5	108977879	108979869	5.20274	3.37016	-0.626457	ENSMUST00000129040	0	Cplx1
chr18	38492982	38493903	1.6091	0.777729	-1.04891	ENSMUST00000129062	830	Gnpda1
chr7	16712433	16713249	1.23364	0.259243	-2.25055	ENSMUST00000129080	1682	Kptn
chr2	118536506	118537560	2.09183	1.2098	-0.789994	ENSMUST00000129153	0	Plcb2
chr16	91671060	91671703	1.18	0.432071	-1.44945	ENSMUST00000129167	0	Son
chr9	120335251	120335923	1.12637	0.518486	-1.1193	ENSMUST00000129168	-601	Myrip
chr11	97574161	97575069	1.6091	0.864143	-0.896909	ENSMUST00000129197	787	Psmb3
chr4	55539033	55539801	1.55546	0.432071	-1.848	ENSMUST00000129250	4842	Klf4
chr9	114820409	114821101	1.01909	0.6049	-0.752519	ENSMUST00000129305	-2216	Gpd1l
chr10	74970639	74971359	1.18	0.345657	-1.77138	ENSMUST00000129307	2651	1110038D17Rik
chr10	92946915	92947642	1.07273	0.518486	-1.04891	ENSMUST00000129421	-3871	Hal
chr6	134709967	134714899	9.11821	5.53051	-0.721337	ENSMUST00000129433	0	Dusp16
chr19	34270277	34271468	3.21819	1.90111	-0.759405	ENSMUST00000129535	2967	Stambpl1
chr5	46069623	46070253	1.07273	0.172829	-2.63387	ENSMUST00000129562	522	Ncapg
chr16	96369572	96370210	0.965458	0.518486	-0.896909	ENSMUST00000129569	-382	Gm15317
chr2	34469980	34470485	0.750912	0.345657	-1.1193	ENSMUST00000129633	-4617	Mapkap1
chr4	8636934	8637532	0.965458	0.518486	-0.896909	ENSMUST00000129655	0	Chd7
chr18	38057486	38058520	1.55546	0.864143	-0.847999	ENSMUST00000129688	0	Diap1
chr2	122567610	122568650	1.98455	1.2098	-0.714045	ENSMUST00000129690	3317	Pldn
chr9	59451640	59452819	2.30637	0.777729	-1.56829	ENSMUST00000129728	0	Celf6
chr16	90944559	90945105	0.804548	0.259243	-1.63387	ENSMUST00000129743	12	Synj1
chr5	140650329	140651119	1.07273	0.345657	-1.63387	ENSMUST00000129747	0	Mad1l1
chr18	68461954	68462936	1.6091	0.518486	-1.63387	ENSMUST00000129849	-1715	Rnmt
chr11	75995540	75996106	0.911821	0.518486	-0.814447	ENSMUST00000129853	2369	Fam57a
chr1	157737802	157738500	1.07273	0.518486	-1.04891	ENSMUST00000129865	-3448	Cep350
chr8	89098992	89099641	1.18	0.259243	-2.18642	ENSMUST00000129898	4914	Abcc12
chr5	107397026	107397798	1.34091	0.691314	-0.955803	ENSMUST00000129938	2991	Cdc7
chrX	71488409	71491908	18.2364	11.4067	-0.676943	ENSMUST00000130007	0	Flna
chr1	122981357	122982184	1.50182	0.864143	-0.797373	ENSMUST00000130015	-1798	B230209K01Rik
chr2	118825373	118826165	1.28728	0.691314	-0.896909	ENSMUST00000130025	2571	Gm14089
chr4	46202147	46202609	0.697275	0.432071	-0.690458	ENSMUST00000130051	-2682	Xpa
chr11	53189111	53189774	0.911821	0.259243	-1.81445	ENSMUST00000130152	2637	Aff4
chr15	102072978	102073584	0.965458	0.432071	-1.15994	ENSMUST00000130204	437	Rarg
chr7	38889081	38889733	0.911821	0.518486	-0.814447	ENSMUST00000130329	2195	Ccne1
chr4	43948570	43949148	0.911821	0.172829	-2.39941	ENSMUST00000130415	-4122	Reck
chr8	111771109	111776644	34.3274	20.3074	-0.757358	ENSMUST00000130446	0	D030068K23Rik
chr2	130215662	130216263	0.858185	0.518486	-0.726984	ENSMUST00000130533	2750	Cpxm1
chr17	17531421	17532367	1.39455	0.6049	-1.20503	ENSMUST00000130554	0	Gm16957
chr2	129524432	129525259	1.39455	0.518486	-1.42742	ENSMUST00000130608	-39	Pdyn
chr5	125347154	125348648	2.52092	1.46904	-0.779072	ENSMUST00000130616	3747	Zfp664
chr2	144206144	144207141	1.6091	1.03697	-0.633875	ENSMUST00000130654	4558	Csrp2bp
chr3	37346632	37347556	1.34091	0.777729	-0.785878	ENSMUST00000130674	-3087	Spata5
chr11	3233842	3234565	1.18	0.432071	-1.44945	ENSMUST00000130747	0	Pik3ip1
chr2	120418523	120419128	1.07273	0.6049	-0.82652	ENSMUST00000130759	2275	Snap23
chr12	86567158	86568075	1.39455	0.432071	-1.69046	ENSMUST00000130760	1684	Eif2b2
chr2	154844128	154846131	7.02639	0.0864143	-6.34537	ENSMUST00000130870	128	Gm14226
chr11	43388205	43389643	2.7891	1.2098	-1.20503	ENSMUST00000130874	4976	Gm12150
chr14	68319671	68320253	0.911821	0.345657	-1.39941	ENSMUST00000130922	-3634	Cdca2
chr8	25933696	25935437	7.24093	4.32071	-0.744906	ENSMUST00000130939	0	Adam5
chr10	120310078	120310659	1.01909	0.432071	-1.23795	ENSMUST00000130950	-1871	Msrb3
chr4	140506180	140507062	1.23364	0.518486	-1.25055	ENSMUST00000130958	3855	Padi2
chr5	115020971	115022260	3.3791	1.38263	-1.28923	ENSMUST00000130983	2947	BC057022
chr12	12944488	12950346	25.6383	16.3323	-0.650571	ENSMUST00000130990	0	Mycn
chr1	177531774	177532403	1.01909	0.518486	-0.974911	ENSMUST00000130996	2014	Fh1
chr9	99300607	99302171	2.7891	1.55546	-0.842461	ENSMUST00000131047	0	Mras
chr14	34060338	34061524	1.71637	1.03697	-0.726984	ENSMUST00000131086	-2052	Arhgap22
chr2	26251733	26253160	1.93092	1.03697	-0.896909	ENSMUST00000131109	1832	Inpp5e
chr7	106807323	106808271	1.34091	0.6049	-1.14845	ENSMUST00000131160	-1678	Gm15635
chr11	102678355	102681573	10.9419	7.08597	-0.62682	ENSMUST00000131164	0	Gjc1
chr7	129437734	129438346	0.911821	0.259243	-1.81445	ENSMUST00000131167	4194	Prkcb
chr11	86932462	86933589	1.77001	0.950557	-0.896909	ENSMUST00000131202	3093	Fam33a
chr3	36459348	36460245	1.50182	0.432071	-1.79737	ENSMUST00000131316	-773	Exosc9
chr2	155536445	155537789	1.98455	1.2098	-0.714045	ENSMUST00000131350	0	Edem2
chr5	23265558	23266535	1.55546	0.777729	-1	ENSMUST00000131404	1697	Pus7
chr19	10097539	10098367	1.28728	0.777729	-0.726984	ENSMUST00000131407	4786	Rab3il1
chr18	39156348	39157082	1.28728	0.432071	-1.57498	ENSMUST00000131421	-2503	Gm15334
chr6	83234610	83235534	1.50182	0.6049	-1.31195	ENSMUST00000131432	-2095	Slc4a5
chr6	86337317	86338214	1.34091	0.864143	-0.633875	ENSMUST00000131500	4124	Pcyox1
chr7	91294933	91295387	0.750912	0.345657	-1.1193	ENSMUST00000131505	939	Fam108c
chr8	48614184	48614761	0.911821	0.432071	-1.07748	ENSMUST00000131551	-801	D030016E14Rik
chr6	113272978	113273456	0.804548	0.259243	-1.63387	ENSMUST00000131594	2445	Brpf1
chr8	23173271	23173850	1.01909	0.518486	-0.974911	ENSMUST00000131624	2061	Alg11
chr10	117128360	117129024	0.965458	0.518486	-0.896909	ENSMUST00000131627	0	Mdm2
chr15	78995762	78996657	1.6091	0.432071	-1.89691	ENSMUST00000131710	0	Gm10863
chr10	127998963	127999615	1.07273	0.6049	-0.82652	ENSMUST00000131728	3269	Pa2g4
chr7	53963838	53964268	0.697275	0.432071	-0.690458	ENSMUST00000131747	20	Saal1
chr5	33723793	33724411	1.12637	0.6049	-0.896909	ENSMUST00000131752	2450	4933407H18Rik
chr1	187107714	187108897	2.41364	1.38263	-0.8038	ENSMUST00000131770	3265	Iars2
chr1	107910411	107911094	0.965458	0.6049	-0.674516	ENSMUST00000131830	2092	Zcchc2
chr2	24297468	24297966	0.750912	0.259243	-1.53434	ENSMUST00000131886	-389	Gm13415
chr2	152152430	152153158	1.07273	0.432071	-1.31195	ENSMUST00000131889	336	Rbck1
chr11	101632768	101634692	3.16456	1.46904	-1.10713	ENSMUST00000132040	0	Etv4
chr2	91121287	91122075	1.23364	0.6049	-1.02815	ENSMUST00000132092	1224	1110051M20Rik
chr10	5936946	5937604	1.18	0.6049	-0.964023	ENSMUST00000132184	0	Gm16153
chr16	4522207	4523125	1.50182	0.777729	-0.949376	ENSMUST00000132284	0	Srl
chr1	191704542	191705426	1.23364	0.6049	-1.02815	ENSMUST00000132289	826	Smyd2
chr11	97022455	97022984	0.858185	0.345657	-1.31195	ENSMUST00000132296	153	Gm11583
chr7	150248869	150250354	4.82729	2.85167	-0.759405	ENSMUST00000132303	-1752	Cd81
chr7	59119056	59119849	1.28728	0.518486	-1.31195	ENSMUST00000132335	0	Gas2
chr1	174479728	174481170	2.84274	0.950557	-1.58044	ENSMUST00000132370	0	4933439K11Rik
chr9	65697460	65698744	2.25273	1.03697	-1.1193	ENSMUST00000132380	2277	Trip4
chr4	149510309	149510849	0.911821	0.518486	-0.814447	ENSMUST00000132426	-2612	Slc2a5
chr1	134281908	134282763	1.44819	0.950557	-0.607402	ENSMUST00000132435	4133	Tmcc2
chr15	103092756	103093709	1.66273	0.345657	-2.26614	ENSMUST00000132438	-3923	Nfe2
chr11	3259513	3260042	0.804548	0.345657	-1.21884	ENSMUST00000132479	-2751	Limk2
chr5	30448376	30449659	1.82364	0.777729	-1.22948	ENSMUST00000132486	-1532	Hadha
chr11	77739116	77740078	1.71637	0.864143	-0.990018	ENSMUST00000132487	2713	Gm11190
chr8	86426679	86428403	2.95001	1.55546	-0.923381	ENSMUST00000132500	2047	Lphn1
chr4	71856931	71858045	2.03819	0.6049	-1.75252	ENSMUST00000132550	2082	Tle1
chr19	4443651	4444299	1.07273	0.6049	-0.82652	ENSMUST00000132579	0	A930001C03Rik
chr6	24469345	24471563	4.07638	1.98753	-1.03631	ENSMUST00000132588	1304	Ndufa5
chr3	97468122	97468815	0.911821	0.432071	-1.07748	ENSMUST00000132719	-1638	Prkab2
chr8	41593382	41593988	1.01909	0.6049	-0.752519	ENSMUST00000132740	-361	Cnot7
chr6	28081753	28082762	1.44819	0.777729	-0.896909	ENSMUST00000132755	368	Grm8
chr4	56862972	56864668	3.05728	1.38263	-1.14484	ENSMUST00000132764	-4009	Ctnnal1
chr3	89053400	89054092	1.07273	0.518486	-1.04891	ENSMUST00000132818	613	Krtcap2
chr7	134616755	134617711	2.03819	1.12339	-0.859434	ENSMUST00000132819	0	Prr14
chr9	65935598	65936573	1.87728	1.2098	-0.633875	ENSMUST00000132841	2582	Snx1
chr2	118488615	118490394	3.16456	1.72829	-0.872661	ENSMUST00000132843	0	Pak6
chr7	139849539	139850378	1.28728	0.777729	-0.726984	ENSMUST00000132849	1190	Gm15582
chr2	33299352	33300497	1.77001	0.864143	-1.03441	ENSMUST00000132913	-1825	Gm13536
chr4	48255644	48256316	0.911821	0.518486	-0.814447	ENSMUST00000132927	1031	Erp44
chr11	100828189	100829669	2.1991	1.38263	-0.669498	ENSMUST00000132934	2197	Ptrf
chr4	107057953	107058868	1.39455	0.518486	-1.42742	ENSMUST00000132950	3888	Tmem48
chr4	97580287	97581155	1.39455	0.691314	-1.01239	ENSMUST00000133011	2565	Nfia
chr1	138074512	138075277	1.18	0.691314	-0.771378	ENSMUST00000133030	4241	2310006M14Rik
chr7	54207265	54207693	0.804548	0.172829	-2.21884	ENSMUST00000133063	3715	Uevld
chr4	125994087	125994954	1.23364	0.777729	-0.665583	ENSMUST00000133068	3652	Adprhl2
chr11	4080254	4081248	1.44819	0.777729	-0.896909	ENSMUST00000133095	2705	Sf3a1
chr5	121824326	121824972	1.01909	0.518486	-0.974911	ENSMUST00000133138	-1187	Trafd1
chr10	58278489	58279115	0.858185	0.172829	-2.31195	ENSMUST00000133151	1684	Sh3rf3
chr16	91593589	91594234	0.965458	0.518486	-0.896909	ENSMUST00000133180	3676	Tmem50b
chr9	27110918	27111869	1.39455	0.864143	-0.690458	ENSMUST00000133213	4105	Igsf9b
chrX	50096937	50097694	1.07273	0.691314	-0.633875	ENSMUST00000133214	77	Kis2
chr17	29218475	29219409	1.55546	0.864143	-0.847999	ENSMUST00000133221	-2570	Gm16197
chr2	14312448	14313285	1.28728	0.691314	-0.896909	ENSMUST00000133258	2311	Slc39a12
chr13	112558530	112559195	0.911821	0.432071	-1.07748	ENSMUST00000133364	0	Map3k1
chr11	80322116	80323156	1.66273	0.864143	-0.944215	ENSMUST00000133400	0	C030013C21Rik
chr4	32759286	32760652	1.87728	0.864143	-1.1193	ENSMUST00000133403	763	Mdn1
chr2	158191063	158191871	1.12637	0.691314	-0.704264	ENSMUST00000133449	-3748	9430008C03Rik
chr4	137345192	137345747	0.858185	0.345657	-1.31195	ENSMUST00000133473	-3907	Alpl
chrX	34648881	34650435	8.74276	5.61693	-0.638307	ENSMUST00000133481	0	Upf3b
chr5	30762534	30763268	1.07273	0.432071	-1.31195	ENSMUST00000133509	1008	Otof
chr10	127021722	127022433	1.18	0.345657	-1.77138	ENSMUST00000133620	-1207	Lrp1
chr14	55265467	55266289	1.18	0.518486	-1.18642	ENSMUST00000133706	-584	Acin1
chr11	45700396	45701192	1.39455	0.864143	-0.690458	ENSMUST00000133715	4499	Clint1
chr17	45815239	45815987	1.18	0.6049	-0.964023	ENSMUST00000133741	1586	Tmem63b
chr6	86392745	86393431	1.12637	0.432071	-1.38234	ENSMUST00000133753	-376	C87436
chr16	49013590	49014479	1.50182	0.864143	-0.797373	ENSMUST00000133754	184	C330027C09Rik
chr9	77768511	77769109	0.911821	0.345657	-1.39941	ENSMUST00000133757	-630	Elovl5
chr4	129322305	129323550	2.14546	1.38263	-0.633875	ENSMUST00000133803	-3997	Txlna
chr3	135548305	135548961	1.01909	0.345657	-1.55987	ENSMUST00000133810	1183	Slc39a8
chr18	70754924	70755504	0.804548	0.345657	-1.21884	ENSMUST00000133889	2017	Mbd2
chr6	30844015	30845060	1.71637	0.6049	-1.50459	ENSMUST00000133916	1367	Copg2
chr3	69346662	69347537	1.55546	0.432071	-1.848	ENSMUST00000134037	310	Ppm1l
chr4	15930143	15930785	0.911821	0.518486	-0.814447	ENSMUST00000134048	-876	Osgin2
chr4	149154472	149155311	1.34091	0.777729	-0.785878	ENSMUST00000134059	0	Gm13073
chr2	113838054	113840175	6.81184	4.14789	-0.715669	ENSMUST00000134129	0	A530058N18Rik
chr6	91117522	91118256	1.18	0.518486	-1.18642	ENSMUST00000134154	-3502	Hdac11
chr7	51591188	51592100	1.34091	0.691314	-0.955803	ENSMUST00000134205	0	Shank1
chr15	98781081	98781904	1.55546	0.864143	-0.847999	ENSMUST00000134214	2070	Tuba1a
chr6	90381306	90382634	2.41364	1.38263	-0.8038	ENSMUST00000134224	-2516	Ccdc37
chr4	151680437	151681020	0.911821	0.345657	-1.39941	ENSMUST00000134242	943	Icmt
chr4	107568710	107569533	1.39455	0.864143	-0.690458	ENSMUST00000134254	2737	0610037L13Rik
chr13	94909960	94910975	1.82364	1.12339	-0.69897	ENSMUST00000134284	0	Gm15907
chr6	85216872	85217495	1.23364	0.345657	-1.83551	ENSMUST00000134392	-1946	Sfxn5
chr5	72946433	72947285	1.34091	0.518486	-1.37084	ENSMUST00000134452	3367	Nfxl1
chr2	157383670	157387944	18.2364	11.5795	-0.655248	ENSMUST00000134513	0	Nnat
chr16	43237884	43238515	0.858185	0.432071	-0.990018	ENSMUST00000134537	1734	Zbtb20
chr7	105306178	105307070	1.55546	0.950557	-0.710496	ENSMUST00000134638	3651	Capn5
chr4	45255906	45256745	1.07273	0.691314	-0.633875	ENSMUST00000134640	118	2900093L17Rik
chr6	33809047	33810186	2.36001	0.950557	-1.31195	ENSMUST00000134653	-1914	Exoc4
chr2	166773389	166774676	1.93092	0.950557	-1.02244	ENSMUST00000134664	1781	Stau1
chr8	46743728	46744534	1.23364	0.691314	-0.835508	ENSMUST00000134675	0	Sorbs2
chr19	38335924	38336727	1.07273	0.518486	-1.04891	ENSMUST00000134832	-2545	Lgi1
chr6	83055405	83056214	1.28728	0.777729	-0.726984	ENSMUST00000134891	-881	Ccdc142
chr11	57921288	57922172	1.28728	0.691314	-0.896909	ENSMUST00000134896	3422	Cnot8
chr2	30268229	30269366	1.87728	1.2098	-0.633875	ENSMUST00000134920	0	Gm16323
chr15	82965033	82965843	1.23364	0.777729	-0.665583	ENSMUST00000135013	499	Poldip3
chrX	71555682	71556273	0.858185	0.432071	-0.990018	ENSMUST00000135041	0	Gdi1
chr11	120077526	120078469	1.55546	0.950557	-0.710496	ENSMUST00000135048	0	Gm11770
chr1	36578397	36579195	1.28728	0.691314	-0.896909	ENSMUST00000135100	793	Cnnm3
chr4	116721363	116722115	1.12637	0.691314	-0.704264	ENSMUST00000135121	4284	Eif2b3
chr7	88602824	88603519	0.965458	0.345657	-1.48187	ENSMUST00000135177	-2474	Cpeb1
chr10	39169305	39170810	2.73546	1.72829	-0.662444	ENSMUST00000135242	-3801	Fyn
chr5	143736407	143737144	1.23364	0.691314	-0.835508	ENSMUST00000135293	4645	Fscn1
chr2	180002420	180003488	1.71637	1.03697	-0.726984	ENSMUST00000135301	4664	Cables2
chr6	122396673	122397804	1.44819	0.691314	-1.06683	ENSMUST00000135320	4947	Rimklb
chr13	54854058	54854820	1.07273	0.432071	-1.31195	ENSMUST00000135343	-2824	Gprin1
chr4	137259603	137260394	1.50182	0.777729	-0.949376	ENSMUST00000135358	2128	1810058N05Rik
chr5	120141038	120141722	1.12637	0.6049	-0.896909	ENSMUST00000135385	0	Gm16065
chr15	76506402	76506844	0.697275	0.432071	-0.690458	ENSMUST00000135388	4327	Ppp1r16a
chr6	66489515	66490202	1.01909	0.6049	-0.752519	ENSMUST00000135411	3845	Mad2l1
chr5	100460437	100461066	0.965458	0.518486	-0.896909	ENSMUST00000135424	4022	Hnrpdl
chr11	116069093	116069764	0.965458	0.345657	-1.48187	ENSMUST00000135460	-2484	2310004N24Rik
chr3	96682708	96683335	0.965458	0.172829	-2.48187	ENSMUST00000135533	-2578	Gpr89
chr2	115874108	115876437	6.59729	3.45657	-0.932533	ENSMUST00000135543	0	Meis2
chr6	124804233	124805401	2.1991	1.29621	-0.762608	ENSMUST00000135546	0	Leprel2
chr11	71518835	71519936	1.39455	0.777729	-0.842461	ENSMUST00000135553	3025	Gm12325
chr2	75610218	75611596	1.98455	1.29621	-0.614509	ENSMUST00000135682	-3649	Gm13657
chr2	132644949	132646014	2.09183	1.2098	-0.789994	ENSMUST00000135685	2991	Mcm8
chr8	125795139	125796068	1.44819	0.864143	-0.744906	ENSMUST00000135702	2056	Fanca
chr12	72145310	72145821	0.750912	0.172829	-2.1193	ENSMUST00000135709	-3507	Arid4a
chr2	180772547	180774768	10.6737	5.61693	-0.926203	ENSMUST00000135766	0	Chrna4
chr4	47024805	47025308	0.911821	0.432071	-1.07748	ENSMUST00000135777	-1153	Gm568
chr7	52012073	52012952	1.39455	0.864143	-0.690458	ENSMUST00000135783	4590	Vrk3
chr9	96753674	96754622	1.82364	0.864143	-1.07748	ENSMUST00000135834	364	Acpl2
chr12	40766486	40767096	1.12637	0.432071	-1.38234	ENSMUST00000135883	1802	4930555J06Rik
chr8	108277338	108278605	1.77001	0.864143	-1.03441	ENSMUST00000135959	3892	Gfod2
chr15	79260975	79261602	0.911821	0.518486	-0.814447	ENSMUST00000136003	-679	Csnk1e
chr17	46544970	46545813	1.34091	0.777729	-0.785878	ENSMUST00000136017	-765	Zfp318
chr3	30935947	30936612	0.911821	0.432071	-1.07748	ENSMUST00000136086	-760	Prkci
chr12	109508667	109509754	1.77001	0.950557	-0.896909	ENSMUST00000136175	3874	Ccdc85c
chr8	72842997	72843953	1.77001	1.12339	-0.655901	ENSMUST00000136257	750	Lass1
chr2	162977877	162978862	1.66273	1.03697	-0.68118	ENSMUST00000136371	2981	Gm14254
chr1	157878869	157879505	0.911821	0.345657	-1.39941	ENSMUST00000136397	579	Tor1aip1
chr2	91544638	91545254	1.01909	0.432071	-1.23795	ENSMUST00000136412	638	Atg13
chr2	29662803	29663445	1.01909	0.432071	-1.23795	ENSMUST00000136444	287	Slc27a4
chr10	38841215	38842044	1.34091	0.691314	-0.955803	ENSMUST00000136546	77	1700025K23Rik
chr4	59348825	59349828	2.03819	1.12339	-0.859434	ENSMUST00000136562	-2932	Susd1
chr9	95859912	95860656	1.01909	0.6049	-0.752519	ENSMUST00000136600	-101	Gm16794
chr7	138579745	138580142	0.697275	0.432071	-0.690458	ENSMUST00000136612	1987	Acadsb
chr6	128354526	128355663	1.6091	1.03697	-0.633875	ENSMUST00000136631	4462	Nrip2
chr1	38254876	38255864	1.98455	1.2098	-0.714045	ENSMUST00000136641	-589	Aff3
chr11	84733030	84733962	1.28728	0.6049	-1.08955	ENSMUST00000136656	-3163	Znhit3
chr13	56829734	56830310	0.858185	0.432071	-0.990018	ENSMUST00000136702	-4068	Smad5
chr10	80573594	80574483	1.44819	0.950557	-0.607402	ENSMUST00000136743	4506	Map2k2
chr4	129269261	129270067	1.12637	0.691314	-0.704264	ENSMUST00000136843	2946	Eif3i
chr11	107045589	107047193	2.36001	1.2098	-0.964023	ENSMUST00000136917	0	Nol11
chr11	62366179	62369514	12.8728	7.8637	-0.711042	ENSMUST00000136938	1003	Ubb
chr5	135712695	135713598	1.44819	0.864143	-0.744906	ENSMUST00000136947	-4661	Baz1b
chr4	46545701	46546415	1.07273	0.691314	-0.633875	ENSMUST00000136978	872	Trim14
chr11	29645220	29645764	0.858185	0.432071	-0.990018	ENSMUST00000137017	3755	Eml6
chr7	148058813	148059442	1.07273	0.345657	-1.63387	ENSMUST00000137024	4605	Sirt3
chr3	121665642	121666249	0.965458	0.518486	-0.896909	ENSMUST00000137089	-4499	Arhgap29
chr7	104540424	104541253	1.23364	0.345657	-1.83551	ENSMUST00000137105	1180	Alg8
chr4	149946599	149947148	1.01909	0.432071	-1.23795	ENSMUST00000137112	2835	Rere
chr11	32111227	32111923	1.12637	0.432071	-1.38234	ENSMUST00000137125	0	Rhbdf1
chr2	62645634	62646584	1.66273	0.864143	-0.944215	ENSMUST00000137221	-660	Gm13569
chr11	29354210	29354743	0.911821	0.345657	-1.39941	ENSMUST00000137227	-1753	Ccdc88a
chr2	154897918	154898564	0.965458	0.518486	-0.896909	ENSMUST00000137242	1620	Ahcy
chr19	25470981	25471602	0.965458	0.345657	-1.48187	ENSMUST00000137260	1190	Kank1
chr12	30688334	30689970	2.84274	1.55546	-0.869942	ENSMUST00000137316	3656	Pxdn
chr6	124984494	124985347	1.44819	0.777729	-0.896909	ENSMUST00000137325	4074	Zfp384
chrX	7291483	7292450	1.82364	0.777729	-1.22948	ENSMUST00000137470	26	Gm14720
chr9	69851466	69852570	1.71637	0.777729	-1.14202	ENSMUST00000137472	282	Bnip2
chr4	141148695	141149333	0.911821	0.259243	-1.81445	ENSMUST00000137491	3052	Fblim1
chr17	13983848	13984525	1.07273	0.172829	-2.63387	ENSMUST00000137503	-3444	Mllt4
chrX	69900891	69901632	1.28728	0.6049	-1.08955	ENSMUST00000137517	0	Gabra3
chr6	30690539	30691152	1.01909	0.6049	-0.752519	ENSMUST00000137521	0	Mest
chr6	146993561	146994315	1.23364	0.777729	-0.665583	ENSMUST00000137556	446	Mrps35
chr2	28597745	28598610	1.50182	0.864143	-0.797373	ENSMUST00000137588	0	Ak8
chr2	103574327	103575038	1.12637	0.345657	-1.70426	ENSMUST00000137600	0	Nat10
chr5	124060259	124061183	1.50182	0.345657	-2.1193	ENSMUST00000137602	999	Clip1
chr7	20077159	20078090	1.98455	1.03697	-0.936437	ENSMUST00000137613	2756	Exoc3l2
chr2	162885297	162885968	0.965458	0.6049	-0.674516	ENSMUST00000137620	214	Mybl2
chr7	116614718	116615542	1.77001	0.518486	-1.77138	ENSMUST00000137704	3107	Trim66
chr8	108811599	108812224	0.911821	0.432071	-1.07748	ENSMUST00000137706	4394	Gm10629
chr11	66870945	66872169	1.82364	1.12339	-0.69897	ENSMUST00000137779	0	Sco1
chr18	61090427	61091137	1.01909	0.6049	-0.752519	ENSMUST00000137805	3826	Camk2a
chr6	12265006	12266072	2.36001	1.46904	-0.683915	ENSMUST00000137836	2258	Thsd7a
chr4	106917783	106919507	3.27183	1.64187	-0.994756	ENSMUST00000137837	-1652	Lrrc42
chr11	115044700	115046150	2.30637	1.29621	-0.831321	ENSMUST00000137843	2246	Nat9
chr7	130118383	130119615	1.77001	1.03697	-0.771378	ENSMUST00000137860	0	Rbbp6
chr8	17537482	17538384	1.55546	0.864143	-0.847999	ENSMUST00000137947	-1897	Csmd1
chr7	87408612	87409455	1.50182	0.777729	-0.949376	ENSMUST00000138005	2508	Ngrn
chr4	14445847	14446461	0.911821	0.0864143	-3.39941	ENSMUST00000138042	-2332	Slc26a7
chr4	138785267	138785959	1.01909	0.432071	-1.23795	ENSMUST00000138045	2393	Capzb
chr4	150392618	150393143	0.858185	0.259243	-1.72698	ENSMUST00000138052	-2365	Per3
chr2	60044430	60045159	1.23364	0.777729	-0.665583	ENSMUST00000138089	2058	Baz2b
chr11	65559163	65560142	2.46728	1.38263	-0.835508	ENSMUST00000138093	0	Map2k4
chr17	71703286	71703795	0.750912	0.345657	-1.1193	ENSMUST00000138193	2042	Smchd1
chr7	73208998	73209827	1.28728	0.518486	-1.31195	ENSMUST00000138271	3333	Snrpa1
chr1	173286380	173288935	4.18365	2.16036	-0.953492	ENSMUST00000138323	0	Pfdn2
chr4	141352116	141353108	1.6091	0.950557	-0.759405	ENSMUST00000138359	2359	Casp9
chr4	128465441	128466078	1.01909	0.432071	-1.23795	ENSMUST00000138371	1259	Zfp362
chr4	111089511	111090424	1.50182	0.172829	-3.1193	ENSMUST00000138394	1701	Bend5
chr18	34791846	34792719	1.28728	0.345657	-1.89691	ENSMUST00000138400	1566	Cdc23
chr11	29414049	29415455	4.07638	2.59243	-0.652983	ENSMUST00000138402	0	Gm12089
chr16	17018253	17018819	0.911821	0.259243	-1.81445	ENSMUST00000138413	0	Mapk1
chr4	42946100	42946983	1.34091	0.864143	-0.633875	ENSMUST00000138425	0	N28178
chr3	103575792	103576615	1.39455	0.864143	-0.690458	ENSMUST00000138430	0	Gm15886
chr4	106598065	106599268	1.77001	0.950557	-0.896909	ENSMUST00000138475	2237	Ssbp3
chr4	147957267	147958340	1.44819	0.777729	-0.896909	ENSMUST00000138492	1777	Gm13209
chr2	131092060	131092896	1.18	0.691314	-0.771378	ENSMUST00000138509	3487	Pank2
chr16	45731683	45732226	0.804548	0.518486	-0.633875	ENSMUST00000138539	-4390	Gm15591
chr2	73209463	73210112	1.07273	0.518486	-1.04891	ENSMUST00000138573	499	Gm13709
chr2	71099886	71100790	1.34091	0.432071	-1.63387	ENSMUST00000138613	1284	Dync1i2
chr11	59317108	59317762	1.12637	0.691314	-0.704264	ENSMUST00000138763	-1402	4933439C10Rik
chr11	32250589	32251379	1.23364	0.172829	-2.83551	ENSMUST00000138771	2751	Sh3pxd2b
chr3	107785028	107785862	1.44819	0.777729	-0.896909	ENSMUST00000138778	2480	Gm12497
chr1	194976702	194978018	2.14546	1.38263	-0.633875	ENSMUST00000138826	-1288	Irf6
chr15	35081896	35082530	0.911821	0.518486	-0.814447	ENSMUST00000138841	2895	Stk3
chr11	80131521	80133516	3.21819	2.07394	-0.633875	ENSMUST00000138846	0	Rhbdl3
chr17	66440771	66441385	1.12637	0.6049	-0.896909	ENSMUST00000138847	169	Ndufv2
chr3	146264173	146264995	1.28728	0.691314	-0.896909	ENSMUST00000138921	4045	Uox
chr16	92101791	92102414	0.965458	0.518486	-0.896909	ENSMUST00000138961	-4092	Mrps6
chr11	105315504	105315935	0.750912	0.259243	-1.53434	ENSMUST00000138977	674	2010-03-01
chr6	30325622	30326262	0.965458	0.518486	-0.896909	ENSMUST00000138983	-2643	Zc3hc1
chr2	77115093	77116096	1.55546	0.345657	-2.16993	ENSMUST00000139021	2551	Sestd1
chr16	84859620	84860319	1.01909	0.345657	-1.55987	ENSMUST00000139101	0	Gabpa
chr16	91379465	91379993	0.911821	0.518486	-0.814447	ENSMUST00000139107	-4113	Ifnar2
chr3	87967361	87968741	2.57455	1.46904	-0.809446	ENSMUST00000139153	481	Mef2d
chr5	138609112	138610239	2.03819	1.12339	-0.859434	ENSMUST00000139223	633	Mcm7
chr10	82768140	82768875	1.39455	0.345657	-2.01239	ENSMUST00000139329	-1021	Slc41a2
chr9	55329596	55330447	1.28728	0.691314	-0.896909	ENSMUST00000139342	4874	Etfa
chr2	125681504	125682173	1.18	0.518486	-1.18642	ENSMUST00000139343	2560	Cops2
chr2	146658523	146661344	11.5855	7.2588	-0.674516	ENSMUST00000139345	4125	Gm14114
chr3	19911126	19911858	1.07273	0.6049	-0.82652	ENSMUST00000139446	1073	Hps3
chr10	80265815	80266630	1.07273	0.691314	-0.633875	ENSMUST00000139461	572	Sf3a2
chr5	112742783	112743364	0.911821	0.345657	-1.39941	ENSMUST00000139482	871	Tpst2
chr5	115812793	115813490	1.12637	0.518486	-1.1193	ENSMUST00000139500	-2662	4930401G09Rik
chr2	154359459	154360317	1.23364	0.6049	-1.02815	ENSMUST00000139506	2686	Cbfa2t2
chr15	88546326	88547234	1.39455	0.259243	-2.42742	ENSMUST00000139515	237	Brd1
chr10	83078722	83079327	0.965458	0.345657	-1.48187	ENSMUST00000139525	-4097	Appl2
chr7	117072887	117073636	1.12637	0.691314	-0.704264	ENSMUST00000139579	-4324	Dennd5a
chr1	178933033	178934116	1.55546	0.518486	-1.58496	ENSMUST00000139589	4895	Sdccag8
chr5	109086570	109087464	1.39455	0.864143	-0.690458	ENSMUST00000139598	-1555	Dgkq
chr17	56456384	56456783	0.697275	0.259243	-1.42742	ENSMUST00000139654	-666	Uhrf1
chr11	108807734	108808749	1.50182	0.864143	-0.797373	ENSMUST00000139682	2801	Axin2
chr4	133282874	133283621	1.23364	0.432071	-1.51358	ENSMUST00000139709	-3081	Arid1a
chr5	123175543	123176981	2.57455	1.46904	-0.809446	ENSMUST00000139712	-692	P2rx4
chr6	124710604	124711634	1.82364	0.950557	-0.939978	ENSMUST00000139763	1671	Eno2
chr15	99160126	99160943	1.18	0.518486	-1.18642	ENSMUST00000139767	-4043	Fmnl3
chr16	17326425	17327271	1.44819	0.864143	-0.744906	ENSMUST00000139768	-889	Pi4ka
chr7	80540329	80541261	1.66273	0.518486	-1.68118	ENSMUST00000139780	4218	Rgma
chr7	86598548	86599238	1.18	0.6049	-0.964023	ENSMUST00000139795	0	Polg
chr6	83259835	83260507	0.911821	0.518486	-0.814447	ENSMUST00000139802	36	Mthfd2
chr11	94831166	94831787	0.965458	0.6049	-0.674516	ENSMUST00000139855	204	Sgca
chr16	91694166	91696387	3.48638	2.07394	-0.749352	ENSMUST00000140199	-930	Cryzl1
chr7	119548529	119549305	1.23364	0.691314	-0.835508	ENSMUST00000140202	-1317	Micalcl
chr16	32819734	32820368	0.911821	0.259243	-1.81445	ENSMUST00000140229	4639	1700021K19Rik
chr8	71334731	71335351	0.911821	0.432071	-1.07748	ENSMUST00000140309	-496	Ints10
chr17	29113809	29114560	1.39455	0.6049	-1.20503	ENSMUST00000140355	1861	Stk38
chr19	5482142	5483408	2.1991	0.691314	-1.6695	ENSMUST00000140365	166	Mus81
chr11	62700856	62701767	1.44819	0.777729	-0.896909	ENSMUST00000140377	3694	Fam18b
chr3	94669120	94669793	1.18	0.691314	-0.771378	ENSMUST00000140397	681	Pogz
chr10	75379877	75380689	1.55546	0.777729	-1	ENSMUST00000140408	-561	Smarcb1
chrX	72998127	72998655	0.965458	0.6049	-0.674516	ENSMUST00000140409	2285	4933407K13Rik
chr13	73639913	73640572	0.911821	0.432071	-1.07748	ENSMUST00000140431	0	Lpcat1
chr11	43233520	43234146	1.01909	0.345657	-1.55987	ENSMUST00000140434	2343	Pttg1
chr1	177551620	177552119	0.804548	0.432071	-0.896909	ENSMUST00000140474	1110	Kmo
chr2	103130919	103131388	0.750912	0.432071	-0.797373	ENSMUST00000140503	0	Ehf
chr3	95856861	95857565	1.12637	0.518486	-1.1193	ENSMUST00000140518	4078	Vps45
chr11	100556767	100557977	1.77001	0.432071	-2.03441	ENSMUST00000140543	0	Dhx58
chr7	31431789	31432743	1.44819	0.864143	-0.744906	ENSMUST00000140550	-784	Rbm42
chr9	86344339	86346244	5.09547	3.11091	-0.711877	ENSMUST00000140613	0	Ube2cbp
chr7	138120616	138121791	2.41364	1.38263	-0.8038	ENSMUST00000140741	-3393	Htra1
chr4	148617583	148618491	1.28728	0.691314	-0.896909	ENSMUST00000140749	3598	Kif1b
chr4	122557985	122558880	1.50182	0.518486	-1.53434	ENSMUST00000140783	4224	Cap1
chr17	15506050	15507461	2.52092	1.38263	-0.866535	ENSMUST00000140784	-697	Dll1
chr2	122426642	122427595	1.55546	0.950557	-0.710496	ENSMUST00000140808	-2095	Gatm
chr4	6295489	6296281	1.34091	0.345657	-1.9558	ENSMUST00000140830	2631	Sdcbp
chr1	137144697	137145379	1.07273	0.432071	-1.31195	ENSMUST00000140839	0	Gm16606
chr11	67460671	67461288	1.07273	0.518486	-1.04891	ENSMUST00000140863	-4791	Gas7
chr7	112783690	112784291	1.07273	0.432071	-1.31195	ENSMUST00000140882	-1606	Trim3
chr6	99675417	99676848	2.14546	1.38263	-0.633875	ENSMUST00000140909	0	Gm16748
chr11	116342773	116344060	1.93092	1.2098	-0.674516	ENSMUST00000140917	-3140	Prpsap1
chr5	64690963	64691634	1.01909	0.6049	-0.752519	ENSMUST00000140960	1196	Tbc1d1
chr11	57987560	57988227	1.07273	0.432071	-1.31195	ENSMUST00000140997	2371	Mrpl22
chr1	61433158	61434719	4.13001	2.67884	-0.624537	ENSMUST00000141000	-557	9530026F06Rik
chr15	12804377	12806232	2.95001	1.46904	-1.00584	ENSMUST00000141010	-2231	Drosha
chr11	78124021	78125160	1.50182	0.777729	-0.949376	ENSMUST00000141026	-1457	Spag5
chr2	30176708	30177446	1.12637	0.432071	-1.38234	ENSMUST00000141035	2061	Gm14471
chr2	168037756	168038520	1.07273	0.518486	-1.04891	ENSMUST00000141036	242	Dpm1
chr2	25303137	25304122	1.71637	0.950557	-0.852515	ENSMUST00000141065	1776	Abca2
chr6	33988312	33988884	0.858185	0.432071	-0.990018	ENSMUST00000141078	-424	Lrguk
chr4	41593025	41593675	1.18	0.6049	-0.964023	ENSMUST00000141120	3809	Gm12405
chr11	84696750	84697302	0.804548	0.345657	-1.21884	ENSMUST00000141173	664	Myo19
chr16	94674537	94675629	1.6091	0.864143	-0.896909	ENSMUST00000141192	1806	Ttc3
chr5	28536194	28537820	3.43274	0.691314	-2.31195	ENSMUST00000141196	0	Cnpy1
chr11	107651758	107652446	0.965458	0.432071	-1.15994	ENSMUST00000141271	-2734	Gm11650
chr6	29845638	29846159	0.750912	0.259243	-1.53434	ENSMUST00000141304	-170	Ahcyl2
chr3	88345725	88346571	1.44819	0.864143	-0.744906	ENSMUST00000141371	866	Rab25
chr5	68206386	68207337	1.71637	1.12339	-0.611507	ENSMUST00000141443	0	Atp8a1
chr4	87674332	87675327	1.93092	0.864143	-1.15994	ENSMUST00000141526	3391	Mllt3
chr1	72333466	72334391	1.6091	0.777729	-1.04891	ENSMUST00000141783	2499	Tmem169
chr1	152255169	152256165	1.6091	0.6049	-1.41148	ENSMUST00000141827	-3854	Tpr
chr9	69863769	69864642	1.34091	0.864143	-0.633875	ENSMUST00000141894	0	Gtf2a2
chr9	58303889	58304715	1.39455	0.864143	-0.690458	ENSMUST00000141912	911	4930461G14Rik
chr10	117108951	117109553	0.965458	0.345657	-1.48187	ENSMUST00000141991	-3396	Cpm
chr4	133707074	133707862	1.28728	0.432071	-1.57498	ENSMUST00000141992	2537	Ccdc21
chr2	35039873	35040856	1.82364	0.691314	-1.39941	ENSMUST00000142015	-206	Rab14
chr5	136490247	136491015	1.18	0.432071	-1.44945	ENSMUST00000142041	-4413	Dtx2
chr2	167467394	167468583	1.6091	1.03697	-0.633875	ENSMUST00000142148	2095	Tmem189
chr8	125603895	125604667	1.34091	0.518486	-1.37084	ENSMUST00000142150	0	Spg7
chr6	124659488	124660487	1.44819	0.691314	-1.06683	ENSMUST00000142187	1601	Emg1
chr17	3077656	3078311	1.07273	0.432071	-1.31195	ENSMUST00000142526	4186	Pisd-ps2
chr13	112786024	112787528	3.75456	2.24677	-0.74079	ENSMUST00000142621	4352	Gm15322
chr4	124447708	124448517	1.23364	0.6049	-1.02815	ENSMUST00000142652	1138	Inpp5b
chr5	138615614	138616621	1.6091	0.6049	-1.41148	ENSMUST00000142687	0	Ap4m1
chr4	141019163	141019828	1.07273	0.345657	-1.63387	ENSMUST00000142695	0	Zbtb17
chr4	151696614	151697481	1.39455	0.345657	-2.01239	ENSMUST00000142735	-2370	Rpl22
chr3	141130753	141131502	1.07273	0.6049	-0.82652	ENSMUST00000142762	2120	Unc5c
chr1	174049628	174050828	1.93092	1.12339	-0.781432	ENSMUST00000142765	1397	Copa
chr2	6800829	6801636	1.23364	0.259243	-2.25055	ENSMUST00000142774	-3680	Gm13389
chr4	123418329	123418953	1.01909	0.432071	-1.23795	ENSMUST00000142778	1798	Akirin1
chr4	86452144	86452602	0.804548	0.0864143	-3.21884	ENSMUST00000142837	-4786	Dennd4c
chr17	13874122	13874936	1.34091	0.432071	-1.63387	ENSMUST00000142863	-4218	Tcte2
chr10	20864688	20865455	1.12637	0.6049	-0.896909	ENSMUST00000142886	0	Gm16786
chr11	57475656	57476683	1.82364	0.950557	-0.939978	ENSMUST00000143009	-4329	4933426K07Rik
chr6	36980768	36981903	1.6091	1.03697	-0.633875	ENSMUST00000143046	0	Dgki
chr11	87887182	87888049	1.39455	0.691314	-1.01239	ENSMUST00000143052	94	Vezf1
chr1	159344424	159345606	1.98455	0.864143	-1.19947	ENSMUST00000143080	-1699	Rasal2
chr14	122855564	122856199	1.01909	0.6049	-0.752519	ENSMUST00000143084	3045	Zic5
chr16	11141867	11142437	0.965458	0.432071	-1.15994	ENSMUST00000143121	0	Zc3h7a
chr2	165240406	165241275	1.55546	0.777729	-1	ENSMUST00000143136	4519	Slc13a3
chr11	116708726	116709633	1.6091	1.03697	-0.633875	ENSMUST00000143184	-582	1110005A03Rik
chr2	158670475	158671798	1.93092	0.691314	-1.48187	ENSMUST00000143195	-4567	Dhx35
chr18	4924346	4925038	1.07273	0.6049	-0.82652	ENSMUST00000143254	2624	Svil
chr13	34431902	34433120	2.25273	0.777729	-1.53434	ENSMUST00000143353	2953	Slc22a23
chr9	59806997	59807692	1.18	0.432071	-1.44945	ENSMUST00000143377	771	Nr2e3
chr12	112487672	112489309	2.95001	1.29621	-1.18642	ENSMUST00000143395	980	Traf3
chr2	128656759	128657356	1.01909	0.259243	-1.97491	ENSMUST00000143398	0	Tmem87b
chr2	103645928	103646480	1.07273	0.432071	-1.31195	ENSMUST00000143559	4300	4930547E08Rik
chr11	96735340	96736168	1.12637	0.691314	-0.704264	ENSMUST00000143569	-79	Gm11523
chr16	20298938	20299493	0.965458	0.518486	-0.896909	ENSMUST00000143648	-701	Parl
chr6	30408504	30409278	1.07273	0.518486	-1.04891	ENSMUST00000143687	-850	1700012C14Rik
chr2	126742853	126743781	1.44819	0.691314	-1.06683	ENSMUST00000143700	2301	2010106G01Rik
chr10	62464422	62465335	1.71637	0.777729	-1.14202	ENSMUST00000143726	0	Rufy2
chr6	124669681	124670606	1.44819	0.777729	-0.896909	ENSMUST00000143765	-833	Gm15884
chr4	120750422	120751111	1.12637	0.6049	-0.896909	ENSMUST00000143768	-80	Zmpste24
chr2	90695194	90696291	1.66273	0.864143	-0.944215	ENSMUST00000143773	2213	Mtch2
chr11	115290846	115291646	1.23364	0.518486	-1.25055	ENSMUST00000143775	181	Kctd2
chr2	135883648	135884563	1.50182	0.950557	-0.65987	ENSMUST00000143777	0	6330527O06Rik
chr2	52283868	52284774	1.55546	0.6049	-1.36257	ENSMUST00000143821	3338	A430018G15Rik
chr8	88045923	88046784	1.39455	0.864143	-0.690458	ENSMUST00000143846	2617	Gpt2
chr4	124162412	124163005	1.01909	0.259243	-1.97491	ENSMUST00000143859	198	1700057H15Rik
chr12	20926174	20927403	2.7891	0.432071	-2.69046	ENSMUST00000143905	0	3110053B16Rik
chr19	4941325	4941900	0.858185	0.432071	-0.990018	ENSMUST00000143930	1147	Peli3
chr17	87840402	87841332	1.66273	0.6049	-1.45879	ENSMUST00000143965	4857	Calm2
chr5	143132480	143133581	1.98455	1.12339	-0.82096	ENSMUST00000143980	-4887	Wipi2
chr7	148387677	148388500	1.12637	0.172829	-2.70426	ENSMUST00000144008	4846	Lrrc56
chr4	137284000	137285317	2.25273	1.03697	-1.1193	ENSMUST00000144059	0	Rap1gap
chr1	95695864	95696496	1.07273	0.518486	-1.04891	ENSMUST00000144106	0	Dtymk
chr11	119937402	119938285	1.28728	0.777729	-0.726984	ENSMUST00000144128	-4067	Azi1
chr4	53856665	53857462	1.34091	0.864143	-0.633875	ENSMUST00000144167	3325	Tmem38b
chr1	108437427	108438120	1.01909	0.6049	-0.752519	ENSMUST00000144260	-400	D630008O14Rik
chr11	85283386	85284640	1.87728	1.2098	-0.633875	ENSMUST00000144276	0	Bcas3
chr4	127670002	127670532	0.804548	0.345657	-1.21884	ENSMUST00000144298	4716	Csmd2
chr19	43765529	43766372	1.44819	0.864143	-0.744906	ENSMUST00000144314	1201	Entpd7
chr11	98867725	98869067	2.14546	1.38263	-0.633875	ENSMUST00000144318	0	Top2a
chr6	72904641	72909749	28.8028	18.5791	-0.632532	ENSMUST00000144337	0	Tmsb10
chr9	54566894	54567594	1.01909	0.345657	-1.55987	ENSMUST00000144365	1028	Wdr61
chr9	96469550	96470464	1.50182	0.864143	-0.797373	ENSMUST00000144376	1999	Rasa2
chr4	131882497	131883018	0.965458	0.6049	-0.674516	ENSMUST00000144387	-1307	Trnau1ap
chr1	138127296	138128229	1.87728	0.691314	-1.44123	ENSMUST00000144464	-410	5730559C18Rik
chr11	115430665	115431362	1.34091	0.518486	-1.37084	ENSMUST00000144473	-67	Nup85
chr17	29173872	29175313	2.95001	1.46904	-1.00584	ENSMUST00000144551	550	Srsf3
chr11	40552376	40553053	1.12637	0.691314	-0.704264	ENSMUST00000144601	2570	Nudcd2
chr5	77427005	77427696	1.07273	0.691314	-0.633875	ENSMUST00000144741	577	Srp72
chr8	27196910	27197462	0.911821	0.259243	-1.81445	ENSMUST00000144750	3824	1700047A11Rik
chr16	84829478	84830262	1.28728	0.432071	-1.57498	ENSMUST00000144799	-421	Atp5j
chr6	42221439	42221999	0.804548	0.518486	-0.633875	ENSMUST00000144821	2157	Casp2
chr3	107474698	107475601	1.44819	0.777729	-0.896909	ENSMUST00000144864	-1207	Ahcyl1
chr6	82978926	82979494	0.858185	0.345657	-1.31195	ENSMUST00000144906	683	D6Mm5e
chr7	72483950	72484771	1.44819	0.6049	-1.25948	ENSMUST00000144961	2913	Tjp1
chr11	86142493	86143010	0.804548	0.172829	-2.21884	ENSMUST00000144983	2676	Med13
chr11	18921935	18924801	4.18365	2.4196	-0.789994	ENSMUST00000144988	-2975	Meis1
chr4	45828700	45829163	0.750912	0.172829	-2.1193	ENSMUST00000145102	73	Igfbpl1
chr5	139815981	139816758	1.18	0.518486	-1.18642	ENSMUST00000145125	-453	Cox19
chr3	37278780	37279580	1.44819	0.691314	-1.06683	ENSMUST00000145228	0	Fgf2
chr11	97480462	97481201	1.23364	0.691314	-0.835508	ENSMUST00000145262	4168	2410003L11Rik
chr4	135353588	135354646	1.98455	0.777729	-1.35147	ENSMUST00000145304	0	Myom3
chr10	13269879	13270515	1.01909	0.6049	-0.752519	ENSMUST00000145337	2111	Pex3
chr11	32095978	32096731	1.07273	0.432071	-1.31195	ENSMUST00000145401	3492	Il9r
chr4	11115016	11116044	1.55546	0.691314	-1.16993	ENSMUST00000145430	-2454	Ccne2
chr11	116555009	116556868	3.54001	1.98753	-0.832779	ENSMUST00000145441	0	St6galnac2
chr2	24850726	24851321	0.965458	0.518486	-0.896909	ENSMUST00000145508	0	Pnpla7
chr2	4960039	4961482	2.25273	0.864143	-1.38234	ENSMUST00000145585	1715	4930551O13Rik
chr15	25711624	25712682	1.66273	0.950557	-0.806711	ENSMUST00000145587	1681	Myo10
chr4	34519605	34521363	2.73546	1.55546	-0.814447	ENSMUST00000145619	2783	Orc3
chr13	105579969	105580598	0.965458	0.6049	-0.674516	ENSMUST00000145661	-1966	Srek1ip1
chr14	56224692	56225274	0.965458	0.518486	-0.896909	ENSMUST00000145680	37	Irf9
chr2	35474876	35475838	1.39455	0.691314	-1.01239	ENSMUST00000145698	-1663	Dab2ip
chr15	89188638	89190060	2.30637	1.38263	-0.738211	ENSMUST00000145793	2295	Ncaph2
chr4	107626034	107627246	1.6091	1.03697	-0.633875	ENSMUST00000145831	0	4930407G08Rik
chr11	97425558	97426178	0.965458	0.432071	-1.15994	ENSMUST00000145845	-1847	Gm11612
chr10	85953127	85955364	5.36365	3.45657	-0.633875	ENSMUST00000145864	0	Syn3
chr9	57913218	57913857	0.965458	0.6049	-0.674516	ENSMUST00000145886	1625	Stra6
chr9	102618979	102626318	44.6256	28.2575	-0.659239	ENSMUST00000145913	0	Amotl2
chr7	73426426	73427429	1.50182	0.518486	-1.53434	ENSMUST00000145954	0	Lrrk1
chr11	8907073	8907753	1.01909	0.518486	-0.974911	ENSMUST00000146002	2929	Hus1
chr18	33949356	33950364	1.66273	1.03697	-0.68118	ENSMUST00000146010	-4211	2410004N09Rik
chr10	80690216	80691222	1.71637	0.864143	-0.990018	ENSMUST00000146030	2309	Atcay
chr1	192757134	192757772	1.12637	0.6049	-0.896909	ENSMUST00000146048	-3359	Angel2
chr11	79771569	79772127	0.858185	0.432071	-0.990018	ENSMUST00000146127	3743	Utp6
chr2	116718795	116720569	3.00365	1.8147	-0.726984	ENSMUST00000146144	4854	Tmco5
chr14	29328177	29329131	1.55546	0.864143	-0.847999	ENSMUST00000146192	3542	Wnt5a
chr3	89230873	89231527	1.01909	0.345657	-1.55987	ENSMUST00000146306	2427	Shc1
chr1	39608483	39609281	1.23364	0.345657	-1.83551	ENSMUST00000146314	0	Gm15832
chr11	101420302	101420988	1.01909	0.518486	-0.974911	ENSMUST00000146452	-2112	Nbr1
chr17	35829071	35830637	2.36001	0.864143	-1.44945	ENSMUST00000146472	4280	Ddr1
chr4	126763847	126764504	1.01909	0.6049	-0.752519	ENSMUST00000146616	16	Zmym6
chr8	73995672	73996217	0.858185	0.518486	-0.726984	ENSMUST00000146677	1364	Dda1
chr17	25059102	25060417	1.82364	1.12339	-0.69897	ENSMUST00000146706	397	Mapk8ip3
chr8	73294368	73295089	1.12637	0.432071	-1.38234	ENSMUST00000146707	-806	Pik3r2
chr5	73553231	73553871	0.965458	0.6049	-0.674516	ENSMUST00000146728	4980	1700071G01Rik
chr9	57959468	57960423	1.66273	0.950557	-0.806711	ENSMUST00000146741	1745	Ccdc33
chr6	92012270	92012937	1.12637	0.691314	-0.704264	ENSMUST00000146743	-4486	Fgd5
chr8	26834939	26835516	1.01909	0.6049	-0.752519	ENSMUST00000146762	1511	Ppapdc1b
chr5	38467335	38468045	1.07273	0.432071	-1.31195	ENSMUST00000146864	0	Stx18
chr7	69125435	69126299	1.28728	0.691314	-0.896909	ENSMUST00000146918	891	A330076H08Rik
chr7	52763014	52763901	1.44819	0.864143	-0.744906	ENSMUST00000146955	1319	Nucb1
chr2	106808557	106809753	1.77001	0.864143	-1.03441	ENSMUST00000146961	0	2700007P21Rik
chr11	51438502	51439647	1.66273	0.345657	-2.26614	ENSMUST00000147009	0	Rmnd5b
chr3	102978000	102979212	1.93092	0.691314	-1.48187	ENSMUST00000147042	2294	Bcas2
chr2	167313920	167314862	1.44819	0.6049	-1.25948	ENSMUST00000147051	-2591	Spata2
chr3	95290912	95291585	1.12637	0.345657	-1.70426	ENSMUST00000147094	-1742	Arnt
chr6	56796317	56796999	1.07273	0.172829	-2.63387	ENSMUST00000147159	-2328	Fkbp9
chr6	91840796	91841462	0.911821	0.345657	-1.39941	ENSMUST00000147188	-879	C130022K22Rik
chr5	110684728	110685555	1.28728	0.691314	-0.896909	ENSMUST00000147194	-2627	Gm16728
chr4	128761281	128761980	1.07273	0.518486	-1.04891	ENSMUST00000147238	154	Rnf19b
chr4	44177821	44181034	18.8801	11.3203	-0.737955	ENSMUST00000147302	0	Rnf38
chr18	73806691	73807193	0.750912	0.432071	-0.797373	ENSMUST00000147315	2281	Smad4
chr2	120810132	120810786	1.07273	0.432071	-1.31195	ENSMUST00000147347	28	Tmem62
chr16	57169736	57170376	0.965458	0.6049	-0.674516	ENSMUST00000147417	2224	Gm16892
chr4	140137676	140138302	1.01909	0.259243	-1.97491	ENSMUST00000147426	0	Arhgef10l
chr11	98107712	98108365	0.911821	0.432071	-1.07748	ENSMUST00000147441	4663	Cdk12
chr1	66373355	66374114	1.18	0.259243	-2.18642	ENSMUST00000147494	1257	Gm10558
chr5	136189596	136190221	1.12637	0.6049	-0.896909	ENSMUST00000147515	-1654	Por
chr5	138103207	138103812	1.01909	0.6049	-0.752519	ENSMUST00000147518	-218	Agfg2
chr7	100151114	100151814	1.12637	0.6049	-0.896909	ENSMUST00000147522	-3678	Gm16744
chr2	32813352	32814070	1.18	0.518486	-1.18642	ENSMUST00000147528	1357	Lrsam1
chr11	102484822	102485446	0.911821	0.345657	-1.39941	ENSMUST00000147541	235	2810433D01Rik
chr1	10466766	10467709	1.71637	0.6049	-1.50459	ENSMUST00000147575	196	Cpa6
chr2	32395643	32396717	1.71637	0.777729	-1.14202	ENSMUST00000147723	0	Fam102a
chr4	128633994	128634736	1.12637	0.518486	-1.1193	ENSMUST00000147731	3907	Adc
chr11	53336457	53337348	1.50182	0.777729	-0.949376	ENSMUST00000147912	3030	2008-09-01
chr11	23975381	23977855	11.4246	7.2588	-0.654339	ENSMUST00000148087	0	Gm12063
chr11	100454775	100455969	1.71637	0.518486	-1.72698	ENSMUST00000148098	2054	Dnajc7
chr17	87774918	87775478	0.911821	0.345657	-1.39941	ENSMUST00000148126	-2715	Ttc7
chr3	143857427	143858029	0.911821	0.345657	-1.39941	ENSMUST00000148128	0	Lmo4
chr2	25785503	25786253	1.23364	0.691314	-0.835508	ENSMUST00000148146	3882	Camsap1
chr2	71354804	71355839	1.77001	1.12339	-0.655901	ENSMUST00000148164	1337	Metap1d
chr2	69619596	69620306	1.23364	0.777729	-0.665583	ENSMUST00000148190	0	4930578N16Rik
chr10	88000989	88001798	1.34091	0.777729	-0.785878	ENSMUST00000148205	-1711	Mybpc1
chr2	155327740	155328814	1.82364	0.6049	-1.59205	ENSMUST00000148296	56	Ggt7
chr12	87161888	87162486	1.07273	0.345657	-1.63387	ENSMUST00000148323	715	0610007P14Rik
chr8	121979459	121980206	1.44819	0.777729	-0.896909	ENSMUST00000148328	3129	Necab2
chr11	120349413	120350111	1.12637	0.691314	-0.704264	ENSMUST00000148332	0	Gm16755
chr8	4200366	4201310	1.55546	0.950557	-0.710496	ENSMUST00000148353	4978	4932443L11Rik
chr11	51081220	51082470	1.77001	1.12339	-0.655901	ENSMUST00000148467	-3031	Clk4
chr2	163144080	163144660	0.911821	0.518486	-0.814447	ENSMUST00000148599	-1454	Tox2
chr17	46886055	46886940	1.6091	0.950557	-0.759405	ENSMUST00000148656	2187	Cnpy3
chr7	132856197	132857059	1.34091	0.777729	-0.785878	ENSMUST00000148701	4694	D430042O09Rik
chr16	20509967	20510707	0.965458	0.345657	-1.48187	ENSMUST00000148714	3498	Eif2b5
chr2	131885884	131886825	1.39455	0.6049	-1.20503	ENSMUST00000148749	-3464	Slc23a2
chr11	34636402	34637102	1.01909	0.6049	-0.752519	ENSMUST00000148853	352	Ccdc99
chr7	19635882	19636500	1.07273	0.345657	-1.63387	ENSMUST00000148861	-1186	Sympk
chr2	155396237	155397007	1.39455	0.6049	-1.20503	ENSMUST00000148870	-1591	Acss2
chr5	121593972	121594580	0.965458	0.518486	-0.896909	ENSMUST00000148871	-329	Ptpn11
chr17	46859196	46859847	1.01909	0.6049	-0.752519	ENSMUST00000148872	2038	Pex6
chr4	102685912	102686828	1.28728	0.777729	-0.726984	ENSMUST00000148892	-1343	BB031773
chr6	87887051	87888153	1.6091	1.03697	-0.633875	ENSMUST00000148914	4066	8430410A17Rik
chr4	116846446	116847315	1.12637	0.6049	-0.896909	ENSMUST00000148918	4017	Kif2c
chr11	72819638	72820551	1.50182	0.777729	-0.949376	ENSMUST00000148964	-2742	P2rx1
chr4	123041715	123042346	1.01909	0.518486	-0.974911	ENSMUST00000149022	1347	Macf1
chr9	110546523	110547165	1.01909	0.345657	-1.55987	ENSMUST00000149089	708	Nbeal2
chr8	131245304	131245975	0.965458	0.345657	-1.48187	ENSMUST00000149116	-2258	Itgb1
chr11	75456220	75456938	1.07273	0.0864143	-3.63387	ENSMUST00000149134	-3350	Inpp5k
chr11	112684920	112685706	1.18	0.6049	-0.964023	ENSMUST00000149136	-762	4933434M16Rik
chr3	68830697	68831433	1.07273	0.6049	-0.82652	ENSMUST00000149174	2583	Smc4
chr15	38425940	38426607	1.12637	0.691314	-0.704264	ENSMUST00000149293	537	Azin1
chr1	65218535	65219809	2.09183	1.29621	-0.690458	ENSMUST00000149310	2330	Idh1
chr6	145175591	145176618	1.77001	0.691314	-1.35634	ENSMUST00000149314	-1515	Kras
chr14	105696858	105697729	1.07273	0.518486	-1.04891	ENSMUST00000149358	3097	Ndfip2
chr2	174675434	174676370	1.39455	0.777729	-0.842461	ENSMUST00000149377	2489	Gm14618
chr9	74124789	74126600	4.55911	2.85167	-0.676943	ENSMUST00000149439	2850	Wdr72
chr17	9116925	9117858	1.39455	0.6049	-1.20503	ENSMUST00000149440	0	Pde10a
chr1	87914119	87916306	5.95366	3.19733	-0.896909	ENSMUST00000149469	0	Spata3
chr6	18337693	18338317	0.858185	0.432071	-0.990018	ENSMUST00000149570	-4834	Cttnbp2
chr19	19075308	19075977	1.12637	0.172829	-2.70426	ENSMUST00000149635	0	Rorb
chr16	87480563	87481233	1.23364	0.259243	-2.25055	ENSMUST00000149656	-450	Usp16
chr5	117820009	117820955	1.55546	0.864143	-0.847999	ENSMUST00000149669	-4706	Wsb2
chr1	138331885	138332578	1.34091	0.259243	-2.37084	ENSMUST00000149783	2908	Ddx59
chr11	36487845	36488588	1.23364	0.432071	-1.51358	ENSMUST00000149787	2660	Odz2
chr3	105948623	105949144	0.750912	0.259243	-1.53434	ENSMUST00000149836	3536	Chi3l3
chr2	24283217	24284161	1.87728	0.864143	-1.1193	ENSMUST00000149860	-4616	Pax8
chr2	122015805	122016502	1.18	0.518486	-1.18642	ENSMUST00000149861	3597	4933406J08Rik
chr4	49650845	49651531	0.965458	0.259243	-1.89691	ENSMUST00000149862	-3059	Rnf20
chr3	90299214	90299909	1.12637	0.6049	-0.896909	ENSMUST00000149884	-4260	Snapin
chr1	17717213	17717901	1.07273	0.518486	-1.04891	ENSMUST00000149914	0	Gm16070
chr14	52860863	52861401	0.858185	0.432071	-0.990018	ENSMUST00000149975	-3398	Chd8
chrX	10056376	10057420	1.66273	0.6049	-1.45879	ENSMUST00000149982	-4864	Tspan7
chr17	46388003	46389363	1.87728	0.950557	-0.981798	ENSMUST00000149989	0	Yipf3
chr19	10269089	10270545	2.41364	1.55546	-0.633875	ENSMUST00000150038	-2313	Gm10143
chr4	6913388	6919196	27.8374	17.8013	-0.645037	ENSMUST00000150082	0	Tox
chr16	18324021	18324583	0.858185	0.345657	-1.31195	ENSMUST00000150152	0	D16H22S680E
chr11	16734513	16735498	1.71637	0.777729	-1.14202	ENSMUST00000150329	-3809	E230015J15Rik
chr11	106828369	106829600	1.93092	1.12339	-0.781432	ENSMUST00000150366	4805	Gm11707
chr4	21776995	21777604	1.12637	0.6049	-0.896909	ENSMUST00000150368	1769	Sfrs18
chr16	91019969	91020574	1.01909	0.345657	-1.55987	ENSMUST00000150397	-494	Gcfc1
chr11	120521264	120522877	3.54001	2.24677	-0.655901	ENSMUST00000150458	0	Notum
chr6	125105232	125106570	2.30637	1.12339	-1.03777	ENSMUST00000150474	1868	Iffo1
chr6	91112824	91113689	1.50182	0.777729	-0.949376	ENSMUST00000150544	-3575	Gm14573
chr9	106326752	106327413	0.911821	0.518486	-0.814447	ENSMUST00000150576	-4372	Rpl29
chr1	174248255	174249320	1.66273	0.777729	-1.09622	ENSMUST00000150598	0	Igsf8
chr13	51847859	51848873	1.66273	1.03697	-0.68118	ENSMUST00000150662	-326	Sema4d
chr9	114686077	114686839	0.965458	0.345657	-1.48187	ENSMUST00000150678	-2379	Gm9888
chr11	23792133	23792689	0.804548	0.259243	-1.63387	ENSMUST00000150711	-230	Papolg
chr11	113035177	113035911	1.23364	0.691314	-0.835508	ENSMUST00000150712	-787	2610035D17Rik
chr19	6123167	6124970	3.05728	1.98753	-0.621274	ENSMUST00000150718	-881	Snx15
chr4	118676972	118678418	2.30637	1.29621	-0.831321	ENSMUST00000150754	-3883	Gm12862
chr9	44495649	44496479	1.18	0.432071	-1.44945	ENSMUST00000150822	4272	Treh
chr8	126005464	126006077	0.965458	0.432071	-1.15994	ENSMUST00000150872	1200	Afg3l1
chr17	29429741	29430280	0.965458	0.259243	-1.89691	ENSMUST00000150874	-4949	BC004004
chr3	30863693	30864501	1.39455	0.864143	-0.690458	ENSMUST00000150939	357	Phc3
chr11	6522560	6523555	1.77001	0.518486	-1.77138	ENSMUST00000151008	-1307	Tbrg4
chrX	97971755	97975094	10.03	6.30824	-0.669016	ENSMUST00000151020	0	Dlg3
chr3	95475910	95477119	1.98455	0.950557	-1.06197	ENSMUST00000151054	3956	Adamtsl4
chr6	135150777	135151632	1.44819	0.864143	-0.744906	ENSMUST00000151071	2349	8430419L09Rik
chr9	26782493	26783404	1.28728	0.6049	-1.08955	ENSMUST00000151075	2137	Acad8
chr17	56318968	56319571	0.965458	0.432071	-1.15994	ENSMUST00000151093	3517	D17Wsu104e
chrX	50408484	50411177	7.83094	4.75279	-0.720411	ENSMUST00000151099	0	C430049B03Rik
chr5	31200465	31201079	0.858185	0.518486	-0.726984	ENSMUST00000151117	2161	Agbl5
chr18	35765331	35766152	1.28728	0.6049	-1.08955	ENSMUST00000151126	-3786	Paip2
chr2	167009936	167010600	1.12637	0.691314	-0.704264	ENSMUST00000151217	-3602	1110018N20Rik
chr7	126991701	126993101	2.14546	1.03697	-1.04891	ENSMUST00000151248	3983	2610020H08Rik
chr2	139982891	139983990	1.66273	0.518486	-1.68118	ENSMUST00000151317	590	Esf1
chr7	30030664	30031541	1.23364	0.777729	-0.665583	ENSMUST00000151339	1817	2200002D01Rik
chr1	173047586	173048245	1.23364	0.518486	-1.25055	ENSMUST00000151340	3468	1700009P17Rik
chr2	119116084	119116991	1.71637	0.864143	-0.990018	ENSMUST00000151500	1563	Vps18
chr4	101095635	101096314	1.28728	0.777729	-0.726984	ENSMUST00000151561	2535	Ak4
chr13	58706763	58707296	0.858185	0.259243	-1.72698	ENSMUST00000151675	4935	Slc28a3
chr9	35227981	35234180	29.0174	14.7768	-0.973579	ENSMUST00000151682	0	Cdon
chr7	108397149	108397854	1.12637	0.518486	-1.1193	ENSMUST00000151693	4518	Fchsd2
chr3	100754727	100755187	0.697275	0.0864143	-3.01239	ENSMUST00000151697	1343	Ttf2
chr11	97540440	97541259	1.28728	0.518486	-1.31195	ENSMUST00000151729	3076	Mllt6
chr2	158606984	158607752	1.44819	0.6049	-1.25948	ENSMUST00000151801	0	Fam83d
chr7	134392755	134393594	1.18	0.518486	-1.18642	ENSMUST00000151893	4142	Zfp771
chr8	47077668	47078418	1.01909	0.6049	-0.752519	ENSMUST00000151983	-2064	Ufsp2
chr5	135630731	135631366	1.07273	0.518486	-1.04891	ENSMUST00000152013	2145	Tbl2
chr4	45358248	45358842	0.858185	0.432071	-0.990018	ENSMUST00000152056	-2645	Exosc3
chr11	18911642	18921868	105.718	65.07	-0.700152	ENSMUST00000152073	0	Gm16141
chr4	57184417	57184975	0.804548	0.345657	-1.21884	ENSMUST00000152074	0	Gm12530
chr7	5036082	5036972	1.50182	0.950557	-0.65987	ENSMUST00000152083	817	Epn1
chr1	36482773	36483275	0.858185	0.345657	-1.31195	ENSMUST00000152088	1937	Lman2l
chr14	66962701	66964599	4.93456	1.64187	-1.58758	ENSMUST00000152093	0	Stmn4
chr11	46245167	46245712	1.12637	0.432071	-1.38234	ENSMUST00000152119	-4715	Med7
chr2	154178553	154180121	3.27183	1.98753	-0.719122	ENSMUST00000152180	0	Cdk5rap1
chr18	68456215	68456924	1.01909	0.345657	-1.55987	ENSMUST00000152193	2933	4933403F05Rik
chr9	44655795	44656478	1.12637	0.518486	-1.1193	ENSMUST00000152241	0	Mll1
chr2	135515044	135516197	1.77001	0.950557	-0.896909	ENSMUST00000152250	2694	Gm14211
chr3	157688759	157689885	1.77001	0.950557	-0.896909	ENSMUST00000152274	-2374	Srsf11
chr8	68141246	68143874	7.29457	1.38263	-2.39941	ENSMUST00000152320	0	2001-03-01
chr4	147454344	147455055	1.18	0.691314	-0.771378	ENSMUST00000152323	3831	Agtrap
chr7	135585310	135586419	1.77001	0.518486	-1.77138	ENSMUST00000152328	2801	Tial1
chr13	34741178	34741923	1.39455	0.777729	-0.842461	ENSMUST00000152392	-742	1300014I06Rik
chr12	81807267	81808677	2.25273	1.38263	-0.704264	ENSMUST00000152465	0	3830431G21Rik
chr13	23457965	23458706	1.23364	0.6049	-1.02815	ENSMUST00000152557	2164	Zfp322a
chr11	53504973	53506435	3.27183	2.07394	-0.657721	ENSMUST00000152598	2068	Rad50
chr10	86153614	86154353	1.12637	0.6049	-0.896909	ENSMUST00000152600	1488	Gm15344
chr7	31744299	31745130	1.12637	0.6049	-0.896909	ENSMUST00000152673	1509	Lsr
chr9	64035974	64036555	0.804548	0.518486	-0.633875	ENSMUST00000152675	0	Map2k1
chr2	28714582	28715263	1.18	0.432071	-1.44945	ENSMUST00000152685	1923	Ddx31
chr3	35968934	35969814	1.34091	0.432071	-1.63387	ENSMUST00000152764	3942	Acad9
chr1	75098081	75098770	1.18	0.518486	-1.18642	ENSMUST00000152855	-4869	Nhej1
chr8	72416449	72417262	1.44819	0.6049	-1.25948	ENSMUST00000152938	-1584	Yjefn3
chr11	71550947	71551619	1.07273	0.6049	-0.82652	ENSMUST00000152957	2331	Gm12326
chr4	124366975	124367782	1.23364	0.6049	-1.02815	ENSMUST00000153088	2997	Utp11l
chr10	42654409	42656280	4.07638	2.24677	-0.859434	ENSMUST00000153091	0	Scml4
chr2	31848566	31849137	0.911821	0.345657	-1.39941	ENSMUST00000153096	-1204	Nup214
chr19	46135518	46136730	1.50182	0.864143	-0.797373	ENSMUST00000153111	-1841	Pprc1
chr1	155749714	155751025	1.93092	1.12339	-0.781432	ENSMUST00000153134	0	Glul
chr16	11007451	11008821	3.43274	1.29621	-1.40506	ENSMUST00000153144	-170	Gm4262
chr4	43260876	43261473	0.911821	0.518486	-0.814447	ENSMUST00000153168	-566	Unc13b
chr9	21214636	21215148	0.750912	0.259243	-1.53434	ENSMUST00000153170	1017	Gm16853
chr16	38545187	38546051	1.34091	0.518486	-1.37084	ENSMUST00000153187	4254	Poglut1
chr5	20281667	20282463	1.23364	0.6049	-1.02815	ENSMUST00000153194	-1737	Phtf2
chr2	181601832	181602843	1.71637	0.777729	-1.14202	ENSMUST00000153214	2769	Polr3k
chr17	55584383	55587306	8.68912	3.6294	-1.25948	ENSMUST00000153220	0	St6gal2
chr15	100961094	100961772	0.911821	0.172829	-2.39941	ENSMUST00000153253	252	Gm16031
chr2	130478267	130478948	1.12637	0.518486	-1.1193	ENSMUST00000153271	1566	Ddrgk1
chr6	113016804	113017410	1.01909	0.518486	-0.974911	ENSMUST00000153310	1386	Thumpd3
chr2	26210772	26211529	1.07273	0.345657	-1.63387	ENSMUST00000153370	-2478	Card9
chrX	54044586	54045105	0.858185	0.259243	-1.72698	ENSMUST00000153401	3413	Fhl1
chr6	83440170	83441349	1.82364	0.432071	-2.07748	ENSMUST00000153415	-3167	Dguok
chr17	15507516	15519316	72.6239	44.7626	-0.69815	ENSMUST00000153434	0	A930024N18Rik
chr5	125030971	125032133	1.82364	0.864143	-1.07748	ENSMUST00000153436	-1723	Gtf2h3
chr11	70418833	70419714	1.23364	0.432071	-1.51358	ENSMUST00000153503	-489	Mink1
chr2	165872897	165873567	1.01909	0.518486	-0.974911	ENSMUST00000153507	0	Ncoa3
chr11	100571135	100571980	1.12637	0.6049	-0.896909	ENSMUST00000153526	1508	Kat2a
chr5	75070580	75074784	18.3437	9.85123	-0.896909	ENSMUST00000153543	0	Lnx1
chr11	121153611	121154273	1.23364	0.518486	-1.25055	ENSMUST00000153579	1555	Foxk2
chr7	129217389	129218291	1.55546	0.777729	-1	ENSMUST00000153640	4978	Ubfd1
chr2	26782895	26783925	1.87728	1.03697	-0.856267	ENSMUST00000153641	4979	Surf4
chr6	113655338	113656341	1.50182	0.864143	-0.797373	ENSMUST00000153661	529	Tatdn2
chr14	119426058	119427169	1.44819	0.777729	-0.896909	ENSMUST00000153693	4287	Uggt2
chr10	39278486	39279642	1.66273	0.950557	-0.806711	ENSMUST00000153722	-619	Gm16364
chr2	114478605	114479059	0.697275	0.172829	-2.01239	ENSMUST00000153726	-1102	Gm13972
chrX	69520398	69521037	0.858185	0.518486	-0.726984	ENSMUST00000153740	-257	Gabre
chr17	28578796	28579577	1.28728	0.691314	-0.896909	ENSMUST00000153744	-130	Fkbp5
chr4	132251555	132252174	1.18	0.6049	-0.964023	ENSMUST00000153809	-4762	Eya3
chr13	49287661	49288387	1.01909	0.6049	-0.752519	ENSMUST00000153819	1998	Ninj1
chr16	31072229	31072963	1.01909	0.172829	-2.55987	ENSMUST00000153859	-2318	AI480653
chr4	114805451	114806293	1.18	0.518486	-1.18642	ENSMUST00000153951	-144	Gm12835
chr5	35319891	35320430	0.858185	0.172829	-2.31195	ENSMUST00000153972	2252	Rgs12
chr3	90187808	90188707	1.39455	0.345657	-2.01239	ENSMUST00000153978	4197	Slc27a3
chr5	31492024	31492607	0.911821	0.518486	-0.814447	ENSMUST00000153986	628	Eif2b4
chr1	63156516	63157470	1.55546	0.691314	-1.16993	ENSMUST00000153992	3360	Ino80d
chr8	97156323	97156945	1.01909	0.6049	-0.752519	ENSMUST00000154035	3823	Rspry1
chr11	54633827	54634744	1.34091	0.777729	-0.785878	ENSMUST00000154044	408	Gm12228
chr4	43699732	43700473	1.07273	0.432071	-1.31195	ENSMUST00000154112	-2089	Tmem8b
chr1	182928182	182929135	1.82364	1.03697	-0.814447	ENSMUST00000154133	-1882	Ephx1
chr11	87003032	87003908	1.18	0.432071	-1.44945	ENSMUST00000154138	0	Trim37
chr11	60529466	60530112	1.01909	0.345657	-1.55987	ENSMUST00000154141	-1244	Flii
chr11	100340501	100341573	1.71637	0.950557	-0.852515	ENSMUST00000154151	0	Acly
chr16	90842048	90843232	2.14546	1.03697	-1.04891	ENSMUST00000154180	-3411	4931408A02Rik
chr8	11814241	11815173	1.50182	0.777729	-0.949376	ENSMUST00000154204	1881	Arhgef7
chr2	156157281	156157970	1.01909	0.6049	-0.752519	ENSMUST00000154227	-1627	4921517L17Rik
chr9	63560079	63561357	2.25273	0.777729	-1.53434	ENSMUST00000154323	-304	Smad3
chr2	150468153	150469916	6.70457	3.88864	-0.785878	ENSMUST00000154328	-4303	Acss1
chr4	22286248	22287480	1.82364	1.03697	-0.814447	ENSMUST00000154344	1487	Fbxl4
chr6	113278275	113279024	1.34091	0.432071	-1.63387	ENSMUST00000154350	1176	Ogg1
chrX	6763666	6766476	11.6391	6.56749	-0.82557	ENSMUST00000154382	0	Clcn5
chr2	102602231	102602991	1.18	0.6049	-0.964023	ENSMUST00000154446	903	Slc1a2
chr5	100520014	100521192	1.55546	0.864143	-0.847999	ENSMUST00000154539	0	5830403M04Rik
chr2	127119295	127119957	0.965458	0.432071	-1.15994	ENSMUST00000154549	1450	Stard7
chr18	39391047	39391810	1.07273	0.518486	-1.04891	ENSMUST00000154551	4027	Arhgap26
chr8	98244824	98245504	1.07273	0.172829	-2.63387	ENSMUST00000154593	3917	Setd6
chr9	109716280	109716889	0.858185	0.432071	-0.990018	ENSMUST00000154663	1488	Spink8
chr2	48800638	48802403	2.89637	1.72829	-0.744906	ENSMUST00000154784	2349	Orc4
chr11	115450996	115451994	1.34091	0.864143	-0.633875	ENSMUST00000154832	-162	Gga3
chr2	113235362	113235972	0.858185	0.432071	-0.990018	ENSMUST00000154834	-4644	Gm13965
chr17	28482316	28482895	0.911821	0.432071	-1.07748	ENSMUST00000154873	4397	Tead3
chr2	80190760	80191582	1.39455	0.6049	-1.20503	ENSMUST00000154912	2951	Dnajc10
chr11	84678672	84679521	1.44819	0.777729	-0.896909	ENSMUST00000154915	4184	Ggnbp2
chr10	23944015	23944627	1.23364	0.6049	-1.02815	ENSMUST00000154916	666	Moxd1
chr4	116475610	116476514	1.6091	0.777729	-1.04891	ENSMUST00000154945	1284	Toe1
chr11	69326768	69327912	2.68183	1.72829	-0.633875	ENSMUST00000154985	2346	Dnahc2
chr13	100184308	100184998	1.12637	0.432071	-1.38234	ENSMUST00000155011	-1490	6430562O15Rik
chr6	11862609	11863240	0.911821	0.172829	-2.39941	ENSMUST00000155037	4802	Phf14
chr11	77743584	77746738	12.4437	7.60446	-0.710496	ENSMUST00000155087	0	Sez6
chr4	137556386	137557079	1.12637	0.345657	-1.70426	ENSMUST00000155142	-3588	Eif4g3
chr19	6429274	6429932	1.23364	0.345657	-1.83551	ENSMUST00000155158	509	Nrxn2
chr2	113885894	113886655	1.23364	0.777729	-0.665583	ENSMUST00000155185	3847	RP23-230H3.6
chr11	3674110	3675124	1.71637	1.12339	-0.611507	ENSMUST00000155197	0	Osbp2
chr3	9249615	9250379	2.14546	1.38263	-0.633875	ENSMUST00000155203	-223	Zbtb10
chr4	124784799	124785739	1.87728	0.950557	-0.981798	ENSMUST00000155212	0	Meaf6
chr4	21888627	21890139	1.71637	1.03697	-0.726984	ENSMUST00000155220	3026	6230409E13Rik
chr7	35162433	35163259	1.23364	0.432071	-1.51358	ENSMUST00000155256	-2071	Lsm14a
chr11	77700884	77701951	1.71637	0.777729	-1.14202	ENSMUST00000155401	-2839	Pipox
chr1	141347446	141348134	1.18	0.259243	-2.18642	ENSMUST00000155402	-3216	Aspm
chr9	50460289	50461556	1.6091	0.950557	-0.759405	ENSMUST00000155417	-2290	Dlat
chr2	65935521	65936170	0.965458	0.6049	-0.674516	ENSMUST00000155453	-2241	Galnt3
chr3	104663602	104664599	1.50182	0.345657	-2.1193	ENSMUST00000155476	2693	Capza1
chr13	14152108	14152603	0.858185	0.432071	-0.990018	ENSMUST00000155553	-2896	Arid4b
chr6	83280578	83281158	0.804548	0.432071	-0.896909	ENSMUST00000155580	4226	Mobkl1b
chr1	52264145	52264769	0.965458	0.518486	-0.896909	ENSMUST00000155587	4285	Gls
chr2	71678133	71678938	1.12637	0.172829	-2.70426	ENSMUST00000155596	1997	Itga6
chr15	98050328	98051679	2.30637	1.46904	-0.650748	ENSMUST00000155603	0	Olfr287
chr2	120070359	120071542	2.84274	1.38263	-1.03987	ENSMUST00000155641	0	Gm13997
chr17	28035442	28036395	1.55546	0.950557	-0.710496	ENSMUST00000155667	3822	Taf11
chr2	126626095	126626771	1.18	0.518486	-1.18642	ENSMUST00000155675	1591	Trpm7
chr1	72893349	72893962	1.18	0.6049	-0.964023	ENSMUST00000155703	-1311	Igfbp2
chr5	130234159	130234952	1.23364	0.518486	-1.25055	ENSMUST00000155796	1240	Gm15903
chr1	163004818	163005464	1.28728	0.6049	-1.08955	ENSMUST00000155808	-692	Cenpl
chr11	4811125	4811867	1.07273	0.518486	-1.04891	ENSMUST00000155872	-3442	Thoc5
chr11	95230663	95232171	2.95001	1.64187	-0.845379	ENSMUST00000155999	-4610	Fam117a
chr4	6345670	6346286	0.911821	0.345657	-1.39941	ENSMUST00000156078	4850	Nsmaf
chr10	87814253	87814926	0.965458	0.345657	-1.48187	ENSMUST00000156097	4816	Dram1
chr6	29313804	29314684	1.44819	0.777729	-0.896909	ENSMUST00000156163	2345	Calu
chr5	151463575	151464492	1.55546	0.518486	-1.58496	ENSMUST00000156180	0	N4bp2l2
chr10	79883512	79884621	1.66273	0.345657	-2.26614	ENSMUST00000156244	0	Tcf3
chr4	55366175	55366810	1.01909	0.518486	-0.974911	ENSMUST00000156263	3215	Rad23b
chr2	33658144	33659210	1.71637	1.12339	-0.611507	ENSMUST00000156297	-2126	A630071L07Rik
chr2	32522962	32523943	1.98455	1.12339	-0.82096	ENSMUST00000156306	-4943	Eng
chr11	98308170	98308792	1.12637	0.6049	-0.896909	ENSMUST00000156328	0	Grb7
chr8	125025393	125025999	1.01909	0.6049	-0.752519	ENSMUST00000156333	-1608	Fam38a
chr7	54171584	54172199	0.965458	0.518486	-0.896909	ENSMUST00000156335	-1805	Tsg101
chr8	97083313	97084704	1.93092	1.03697	-0.896909	ENSMUST00000156377	-1846	Cpne2
chr2	172808043	172808795	1.28728	0.518486	-1.31195	ENSMUST00000156471	-2583	Spo11
chr16	9993129	9995560	5.20274	3.19733	-0.702406	ENSMUST00000156482	0	Grin2a
chr9	40139711	40140411	1.01909	0.518486	-0.974911	ENSMUST00000156511	-648	1700110K17Rik
chr4	62890872	62891834	1.82364	1.03697	-0.814447	ENSMUST00000156519	-3486	Col27a1
chrX	163058876	163060552	2.52092	1.64187	-0.618608	ENSMUST00000156526	0	Gm15226
chr19	46744513	46745387	1.50182	0.777729	-0.949376	ENSMUST00000156577	395	Cyp17a1
chr16	96031968	96032964	1.6091	0.950557	-0.759405	ENSMUST00000156615	-2045	2810404F17Rik
chr5	73458919	73460053	1.55546	0.691314	-1.16993	ENSMUST00000156661	2765	Fryl
chr2	48742679	48743367	1.07273	0.518486	-1.04891	ENSMUST00000156681	-2542	Acvr2a
chr5	143661339	143662020	1.07273	0.691314	-0.633875	ENSMUST00000156725	-4240	Fbxl18
chr3	107552167	107553516	2.30637	1.03697	-1.15325	ENSMUST00000156820	144	Csf1
chr11	59648965	59649567	1.01909	0.345657	-1.55987	ENSMUST00000156837	871	Cops3
chr11	5735682	5736488	1.18	0.6049	-0.964023	ENSMUST00000156913	0	Polm
chr5	3584588	3585215	1.07273	0.345657	-1.63387	ENSMUST00000156973	4092	1700109H08Rik
chr5	8992123	8992869	1.28728	0.518486	-1.31195	ENSMUST00000157024	4174	Crot
chr2	103879351	103879898	0.804548	0.432071	-0.896909	ENSMUST00000157114	-928	SCARNA21
chr7	74711662	74712612	1.55546	0.691314	-1.16993	ENSMUST00000157301	2978	SNORA70
chr13	21988386	21989896	3.75456	1.12339	-1.74079	ENSMUST00000157523	0	Mir1983
chr11	98571902	98574155	3.9691	1.72829	-1.19947	ENSMUST00000157544	0	SNORD124
chr11	119605534	119606258	1.12637	0.691314	-0.704264	ENSMUST00000158045	-1457	SNORA31
chr10	87623234	87623961	1.07273	0.0864143	-3.63387	ENSMUST00000158218	3858	U6atac
chr4	86229106	86229722	0.965458	0.345657	-1.48187	ENSMUST00000158333	2766	Scarna8
chr9	111142403	111142855	0.750912	0.259243	-1.53434	ENSMUST00000158457	4517	7SK
chr11	23524141	23524741	0.858185	0.0864143	-3.31195	ENSMUST00000158478	2121	5S_rRNA
chr1	57927284	57928129	1.12637	0.518486	-1.1193	ENSMUST00000158551	4703	snoU13
chr3	115684703	115686100	2.03819	1.29621	-0.652983	ENSMUST00000158636	1885	Mir669n
chr6	114955442	114956640	1.93092	1.03697	-0.896909	ENSMUST00000158670	2379	U3
chr7	117135185	117135756	0.804548	0.172829	-2.21884	ENSMUST00000158681	3595	U6
chr5	66170362	66171173	1.18	0.691314	-0.771378	ENSMUST00000158712	2111	SNORA73
chr12	32064672	32065761	1.66273	0.6049	-1.45879	ENSMUST00000158995	0	U7
chr6	52107305	52110096	8.26003	5.18486	-0.671842	ENSMUST00000159006	0	Gm15051
chr12	16761202	16762121	1.34091	0.432071	-1.63387	ENSMUST00000159120	1881	Greb1
chr15	98494964	98495552	1.07273	0.432071	-1.31195	ENSMUST00000159170	-1645	Ddx23
chr1	106808410	106809573	1.98455	0.864143	-1.19947	ENSMUST00000159213	0	Gm15699
chr9	112088809	112091944	5.63184	3.54299	-0.66864	ENSMUST00000159246	0	Arpp21
chr18	74173445	74175622	4.13001	2.67884	-0.624537	ENSMUST00000159260	-1939	D730045A05Rik
chr10	18110378	18111019	0.965458	0.6049	-0.674516	ENSMUST00000159299	252	Nhsl1
chr16	22509460	22510368	2.14546	1.2098	-0.82652	ENSMUST00000159309	-1185	9230117E06Rik
chr4	87766134	87767045	1.44819	0.691314	-1.06683	ENSMUST00000159342	-158	BC057079
chr5	66910465	66911174	1.18	0.6049	-0.964023	ENSMUST00000159357	-4390	Apbb2
chr6	29446214	29446757	0.804548	0.432071	-0.896909	ENSMUST00000159479	-301	Kcp
chr3	75319722	75320356	0.858185	0.432071	-0.990018	ENSMUST00000159519	4597	Pdcd10
chr12	53232705	53234157	3.05728	1.90111	-0.685405	ENSMUST00000159567	0	Nubpl
chr3	101999122	101999624	0.750912	0.345657	-1.1193	ENSMUST00000159586	2205	Vangl1
chr9	108968706	108969425	1.18	0.691314	-0.771378	ENSMUST00000159614	-800	Atrip
chr19	8920853	8921471	1.01909	0.6049	-0.752519	ENSMUST00000159653	175	Bscl2
chr1	6261612	6262244	1.01909	0.6049	-0.752519	ENSMUST00000159656	855	Rb1cc1
chr17	13151509	13152645	2.25273	1.2098	-0.896909	ENSMUST00000159697	593	Acat2
chr17	12936645	12937282	0.911821	0.518486	-0.814447	ENSMUST00000159731	2383	Airn
chr12	9025275	9026075	1.12637	0.345657	-1.70426	ENSMUST00000159735	-3331	Wdr35
chr1	164229218	164230909	4.77365	3.0245	-0.658397	ENSMUST00000159763	-3452	Dnm3
chr6	119904262	119905018	1.12637	0.432071	-1.38234	ENSMUST00000159785	1171	Wnk1
chr1	174454872	174456028	1.98455	1.03697	-0.936437	ENSMUST00000159792	-152	Ccdc19
chr10	75744661	75745290	0.858185	0.0864143	-3.31195	ENSMUST00000159807	3277	Dip2a
chr3	101949779	101951673	2.89637	1.29621	-1.15994	ENSMUST00000159833	1807	Casq2
chr1	160891563	160892414	1.23364	0.691314	-0.835508	ENSMUST00000159861	-3694	Pappa2
chr16	22545075	22546585	2.95001	1.8147	-0.700989	ENSMUST00000159953	-2041	Gm15651
chr14	70948509	70949378	1.71637	0.691314	-1.31195	ENSMUST00000159959	-2641	Hr
chr2	92066424	92067263	1.12637	0.518486	-1.1193	ENSMUST00000159961	-1373	Phf21a
chr6	85797285	85798142	1.28728	0.777729	-0.726984	ENSMUST00000160012	3313	Gm9769
chr3	40592600	40593459	1.12637	0.259243	-2.1193	ENSMUST00000160026	4670	Hspa4l
chr5	132007600	132008343	1.39455	0.691314	-1.01239	ENSMUST00000160071	1925	Auts2
chr3	65106146	65106887	1.34091	0.691314	-0.955803	ENSMUST00000160136	4812	Kcnab1
chr5	107941888	107942597	1.07273	0.691314	-0.633875	ENSMUST00000160160	3927	1700028K03Rik
chr13	63414605	63416012	2.30637	1.03697	-1.15325	ENSMUST00000160166	2692	Fancc
chr6	77927563	77930511	8.47457	5.18486	-0.708837	ENSMUST00000160252	0	Ctnna2
chr10	43097771	43098598	1.12637	0.518486	-1.1193	ENSMUST00000160308	-4046	Gm16562
chr3	87718931	87720234	2.09183	1.29621	-0.690458	ENSMUST00000160312	1050	Hdgf
chr15	7175679	7176725	1.93092	0.950557	-1.02244	ENSMUST00000160314	-2611	Egflam
chr15	81699210	81700037	1.28728	0.518486	-1.31195	ENSMUST00000160415	2059	Phf5a
chr9	45702439	45703067	0.965458	0.518486	-0.896909	ENSMUST00000160469	3452	Rnf214
chr13	14090735	14091365	1.01909	0.432071	-1.23795	ENSMUST00000160510	2500	Tbce
chr17	13160122	13160739	0.858185	0.432071	-0.990018	ENSMUST00000160654	4490	Gm15946
chr3	87773250	87779609	48.3265	31.714	-0.607693	ENSMUST00000160694	0	Nes
chr12	57874863	57875316	0.750912	0.259243	-1.53434	ENSMUST00000160709	1032	Slc25a21
chr8	129817918	129818528	0.858185	0.345657	-1.31195	ENSMUST00000160717	-4957	Pard3
chr15	3218104	3218819	1.18	0.6049	-0.964023	ENSMUST00000160787	0	Sepp1
chr16	17336235	17336987	0.965458	0.6049	-0.674516	ENSMUST00000161034	4761	Serpind1
chr17	10689233	10689665	0.697275	0.432071	-0.690458	ENSMUST00000161091	0	Gm16168
chr5	122252230	122253329	1.77001	0.950557	-0.896909	ENSMUST00000161159	0	Atxn2
chr4	151826718	151828135	2.52092	1.46904	-0.779072	ENSMUST00000161236	1018	Kcnab2
chr9	13462776	13463476	1.34091	0.432071	-1.63387	ENSMUST00000161245	-3428	Maml2
chr15	76208306	76209072	1.18	0.432071	-1.44945	ENSMUST00000161305	-1619	Heatr7a
chr6	70843737	70844294	0.911821	0.432071	-1.07748	ENSMUST00000161316	-2464	Eif2ak3
chr1	165899888	165900689	1.12637	0.6049	-0.896909	ENSMUST00000161321	1762	BC055324
chr14	123294062	123294816	1.18	0.259243	-2.18642	ENSMUST00000161322	-3134	A2ld1
chr15	57788969	57789797	1.07273	0.6049	-0.82652	ENSMUST00000161329	-171	Wdr67
chr6	140579290	140579963	1.01909	0.518486	-0.974911	ENSMUST00000161335	3889	Aebp2
chr13	96764659	96766117	3.11092	1.98753	-0.646365	ENSMUST00000161346	-4891	Sv2c
chr4	151786391	151787274	1.34091	0.864143	-0.633875	ENSMUST00000161416	1484	Gm16333
chr17	89068969	89069660	1.23364	0.518486	-1.25055	ENSMUST00000161481	935	Gtf2a1l
chr1	183133863	183134735	1.07273	0.6049	-0.82652	ENSMUST00000161531	-482	Wdr26
chr10	57720774	57721600	1.28728	0.777729	-0.726984	ENSMUST00000161570	2137	Gcc2
chr6	114351653	114352289	1.01909	0.6049	-0.752519	ENSMUST00000161650	-1371	Hrh1
chr5	138724740	138725342	1.01909	0.432071	-1.23795	ENSMUST00000161691	2958	Stag3
chr5	124676893	124677662	1.44819	0.691314	-1.06683	ENSMUST00000161697	-2072	4930568K20Rik
chr7	96912376	96913011	0.965458	0.518486	-0.896909	ENSMUST00000161734	-2192	Gm15744
chr1	155071185	155072135	2.1991	1.38263	-0.669498	ENSMUST00000161744	4140	Lamc1
chr7	6349998	6350658	1.18	0.518486	-1.18642	ENSMUST00000161855	-767	Gm16532
chr15	99283961	99284847	1.66273	0.950557	-0.806711	ENSMUST00000161948	3297	Nckap5l
chr9	111591811	111593544	2.89637	1.2098	-1.25948	ENSMUST00000161995	0	Stac
chr5	15185372	15187134	2.57455	1.38263	-0.896909	ENSMUST00000162113	0	Speer7-ps1
chr8	113866541	113867683	1.98455	1.12339	-0.82096	ENSMUST00000162216	4275	Fa2h
chr14	21325880	21326851	1.98455	0.950557	-1.06197	ENSMUST00000162217	-2889	Ppp3cb
chr5	147028813	147029929	1.50182	0.691314	-1.1193	ENSMUST00000162219	0	Rnf6
chr8	75201325	75202008	1.01909	0.0864143	-3.55987	ENSMUST00000162248	-3682	Nwd1
chr16	58731437	58732581	1.87728	0.691314	-1.44123	ENSMUST00000162249	0	Cldn25
chr14	31365719	31366819	1.87728	0.864143	-1.1193	ENSMUST00000162356	3324	Tkt
chr13	49240624	49241645	1.55546	0.777729	-1	ENSMUST00000162403	957	Wnk2
chr7	35755123	35755717	0.965458	0.172829	-2.48187	ENSMUST00000162509	596	Pepd
chr18	62816757	62817367	0.965458	0.518486	-0.896909	ENSMUST00000162511	0	Spink10
chr6	38512670	38513495	1.34091	0.691314	-0.955803	ENSMUST00000162530	3457	Luc7l2
chr14	26478183	26478792	0.965458	0.518486	-0.896909	ENSMUST00000162546	1869	Zmiz1
chr6	119856718	119857649	1.50182	0.864143	-0.797373	ENSMUST00000162590	3963	Rad52
chr6	38386980	38387875	1.66273	0.950557	-0.806711	ENSMUST00000162593	-2658	Ubn2
chr1	128724936	128728076	20.1137	12.098	-0.73341	ENSMUST00000162647	0	Nckap5
chr6	85881685	85882265	0.858185	0.259243	-1.72698	ENSMUST00000162660	1109	Nat8b
chr15	79606946	79607715	1.28728	0.6049	-1.08955	ENSMUST00000162713	0	Dnalc4
chr6	100617761	100618570	1.34091	0.259243	-2.37084	ENSMUST00000162776	2558	Shq1
chr5	124702225	124702930	0.965458	0.259243	-1.89691	ENSMUST00000162812	-2457	Pitpnm2
chr1	182745476	182746302	1.39455	0.864143	-0.690458	ENSMUST00000162814	-1403	H3f3a
chr14	104052996	104053914	1.66273	1.03697	-0.68118	ENSMUST00000162818	-1074	Slain1
chr9	88439866	88441003	1.6091	1.03697	-0.633875	ENSMUST00000162827	-1855	Zfp949
chr13	107771720	107772775	1.71637	0.777729	-1.14202	ENSMUST00000162845	-4523	Kif2a
chr3	122258108	122259316	1.71637	1.12339	-0.611507	ENSMUST00000162884	2847	Fnbp1l
chr11	22869617	22870319	1.07273	0.259243	-2.04891	ENSMUST00000162924	2541	Commd1
chr8	14965456	14966120	1.12637	0.691314	-0.704264	ENSMUST00000162958	-3871	Gm16350
chr10	122337254	122338288	1.66273	0.864143	-0.944215	ENSMUST00000162969	4832	Ppm1h
chr9	30754382	30754931	0.804548	0.345657	-1.21884	ENSMUST00000163037	3341	Adamts8
chr3	95637399	95638105	1.07273	0.691314	-0.633875	ENSMUST00000163059	-669	Prpf3
chr1	10037188	10037967	1.07273	0.172829	-2.63387	ENSMUST00000163177	616	Cspp1
chr15	98373220	98374273	1.71637	0.777729	-1.14202	ENSMUST00000163180	0	Ccnt1
chr9	58045437	58046692	2.30637	1.38263	-0.738211	ENSMUST00000163200	2831	Islr2
chr7	128262747	128263395	0.911821	0.259243	-1.81445	ENSMUST00000163275	845	Otoa
chr15	84572316	84573047	0.965458	0.6049	-0.674516	ENSMUST00000163312	0	Arhgap8
chr2	170016524	170017160	0.911821	0.345657	-1.39941	ENSMUST00000163340	2394	Gm17619
chr2	120356020	120356708	1.12637	0.172829	-2.70426	ENSMUST00000163384	1087	Zfp106
chr13	89803388	89804146	1.12637	0.691314	-0.704264	ENSMUST00000163430	569	Gm16318
chr19	16858840	16859483	1.18	0.6049	-0.964023	ENSMUST00000163490	-3424	Vps13a
chr3	28600726	28601463	1.01909	0.259243	-1.97491	ENSMUST00000163536	3789	Slc2a2
chr10	59678800	59683097	21.7228	14.2584	-0.607402	ENSMUST00000163556	0	Chst3
chr9	103404731	103405525	1.34091	0.691314	-0.955803	ENSMUST00000163573	-1503	Tmem108
chr14	8603229	8604243	1.55546	0.777729	-1	ENSMUST00000163635	2341	Gm10044
[truncated: 275 more rows]

## Sheet: B-AcH4 depleted peaks
chr	start	end	WT	KO	lfc	NearestTSS	DistnaceToTSS	GeneName
chr14	124022007	124022915	1.89903	1.01724	-0.900594	ENSMUST00000000201	3452	Nalcn
chr6	17692180	17692735	0.949513	0.339081	-1.48556	ENSMUST00000000674	-857	St7
chr2	164595355	164596288	3.19382	1.52587	-1.06565	ENSMUST00000001439	0	Ube2c
chrX	20239377	20239919	1.12215	0.169541	-2.72657	ENSMUST00000001989	-105	Uba1
chr3	104618381	104618896	0.949513	0.339081	-1.48556	ENSMUST00000002297	2265	Mov10
chr17	56970564	56971454	3.1075	1.35633	-1.19605	ENSMUST00000002444	-134	Rfx2
chr8	73363890	73365424	3.5391	1.69541	-1.06175	ENSMUST00000002989	-272	Arrdc2
chr9	21856611	21857296	1.29479	0.169541	-2.93302	ENSMUST00000003501	-145	Elavl3
chr6	149359338	149360143	1.72639	0.847703	-1.02613	ENSMUST00000003544	1389	Bicd1
chr8	109924423	109925024	1.46743	0.508622	-1.52863	ENSMUST00000003947	2083	Nqo1
chr8	75874071	75874844	1.72639	0.678163	-1.34805	ENSMUST00000004497	1675	Large
chr13	55254567	55255207	1.20847	0.508622	-1.24852	ENSMUST00000005452	568	Fgfr4
chr13	83638710	83639266	1.29479	0.169541	-2.93302	ENSMUST00000005722	-3767	Mef2c
chr2	18916250	18916844	1.03583	0.169541	-2.61109	ENSMUST00000006912	2910	Pip4k2a
chr18	37249001	37250208	4.48861	1.52587	-1.55664	ENSMUST00000007584	0	Pcdha1
chr18	68495987	68498245	9.75409	5.08622	-0.939414	ENSMUST00000007624	0	Mc5r
chr8	73392907	73393812	1.64007	0.678163	-1.27405	ENSMUST00000007865	3578	Ccdc124
chr4	133314808	133315474	1.20847	0.339081	-1.83348	ENSMUST00000008024	-2125	Arid1a
chr7	28435366	28436461	2.33062	1.01724	-1.19605	ENSMUST00000008088	-2473	Ttc9b
chr17	32822139	32823299	3.36646	1.18678	-1.50417	ENSMUST00000008801	0	Cyp4f15
chr2	26926334	26926850	1.03583	0.508622	-1.02613	ENSMUST00000009358	850	Tmem8c
chr7	150188508	150189229	1.46743	0.169541	-3.11359	ENSMUST00000009396	-1722	Tspan32
chr6	48523912	48524470	0.949513	0.508622	-0.900594	ENSMUST00000009425	-1244	Rarres2
chr9	107466301	107466794	0.949513	0.169541	-2.48556	ENSMUST00000010198	717	Tusc2
chr3	107565068	107565502	0.949513	0.169541	-2.48556	ENSMUST00000014743	-1682	Csf1
chr11	70435383	70435906	1.20847	0.169541	-2.83348	ENSMUST00000014753	-2666	Chrne
chr4	96013164	96013976	1.64007	0.339081	-2.27405	ENSMUST00000015368	1378	Cyp2j11
chr3	95995977	95996516	1.12215	0.169541	-2.72657	ENSMUST00000016087	4994	Bola1
chr13	73898935	73899826	2.15798	1.01724	-1.08502	ENSMUST00000017900	-1319	Slc12a7
chr2	73752683	73753259	1.38111	0.339081	-2.02613	ENSMUST00000018914	-3301	Atp5g3
chr12	86610056	86610586	1.03583	0.339081	-1.61109	ENSMUST00000019378	929	Mlh3
chr10	18466173	18466682	0.949513	0.339081	-1.48556	ENSMUST00000019999	-2610	D10Bwg1379e
chr10	53318466	53318976	1.12215	0.508622	-1.1416	ENSMUST00000020004	1701	Asf1a
chr10	20878721	20879201	1.03583	0.508622	-1.02613	ENSMUST00000020156	1590	Myb
chr10	87921218	87921728	0.949513	0.339081	-1.48556	ENSMUST00000020252	-586	Sycp3
chr10	116019388	116020120	1.72639	0.678163	-1.34805	ENSMUST00000020374	-822	Cnot2
chr11	50137436	50138042	1.03583	0.508622	-1.02613	ENSMUST00000020637	1134	Canx
chr1	135978218	135978969	1.55375	0.678163	-1.19605	ENSMUST00000020692	-2522	Btg2
chr11	87606007	87606767	1.38111	0.508622	-1.44116	ENSMUST00000020779	-316	Mpo
chr12	3361147	3361620	0.949513	0.339081	-1.48556	ENSMUST00000020999	-3512	Kif3c
chr11	80966615	80967266	1.46743	0.678163	-1.11359	ENSMUST00000021045	0	Accn1
chr11	70326970	70327433	0.949513	0.508622	-0.900594	ENSMUST00000021179	686	Vmo1
chr12	70823263	70823949	1.29479	0.169541	-2.93302	ENSMUST00000021370	1913	L2hgdh
chr12	103679169	103679706	1.12215	0.169541	-2.72657	ENSMUST00000021607	-1147	Lgmn
chr12	113852843	113853354	1.03583	0.339081	-1.61109	ENSMUST00000021726	-4904	Adssl1
chr13	69140564	69142005	5.00652	2.20403	-1.18367	ENSMUST00000022013	-2146	Adcy2
chr13	76109296	76109781	0.949513	0.169541	-2.48556	ENSMUST00000022081	4111	Spata9
chr14	45950444	45951113	1.46743	0.339081	-2.11359	ENSMUST00000022380	942	Psmc6
chr14	66284525	66285261	1.38111	0.508622	-1.44116	ENSMUST00000022610	0	Scara5
chr14	96917128	96918122	2.50326	1.18678	-1.07675	ENSMUST00000022666	200	Klhl1
chr14	119341065	119341604	0.949513	0.508622	-0.900594	ENSMUST00000022734	3913	Dnajc3
chr15	57098520	57099165	1.03583	0.169541	-2.61109	ENSMUST00000022995	-1805	Slc22a22
chr15	55139443	55140126	1.55375	0.678163	-1.19605	ENSMUST00000023053	140	Col14a1
chr15	54923294	54923785	1.20847	0.169541	-2.83348	ENSMUST00000023059	-1249	Dscc1
chr15	82124570	82125098	1.03583	0.508622	-1.02613	ENSMUST00000023089	-4316	Wbp2nl
chr15	82100874	82101495	1.38111	0.508622	-1.44116	ENSMUST00000023095	-3870	2003-09-01
chr16	52032949	52033844	1.89903	0.169541	-3.48556	ENSMUST00000023313	1232	Cblb
chr16	91041800	91042540	1.29479	0.678163	-0.933016	ENSMUST00000023698	1870	Gcfc1
chr16	5205036	5205592	0.949513	0.508622	-0.900594	ENSMUST00000023911	-932	Nagpa
chr2	71385830	71386682	1.64007	0.847703	-0.952125	ENSMUST00000024159	-1020	Dlx2
chr4	155333804	155334449	1.38111	0.339081	-2.02613	ENSMUST00000024338	-1978	Fam132a
chr17	7368914	7369588	1.64007	0.169541	-3.27405	ENSMUST00000024619	-4876	Rps6ka2
chr17	9072078	9072597	0.949513	0.169541	-2.48556	ENSMUST00000024647	-694	Pde10a
chr6	148557172	148557810	1.38111	0.508622	-1.44116	ENSMUST00000024796	446	Gm6313
chr17	27302031	27302653	1.46743	0.678163	-1.11359	ENSMUST00000025046	2057	Ip6k3
chr18	47008822	47009895	2.58958	0.847703	-1.61109	ENSMUST00000025358	0	4833403I15Rik
chr18	43217024	43220396	9.40881	4.91668	-0.936329	ENSMUST00000025377	0	Ppp2r2b
chr18	43548160	43549149	2.2443	0.678163	-1.72657	ENSMUST00000025379	3883	Dpysl3
chr18	78408401	78409135	1.64007	0.847703	-0.952125	ENSMUST00000025434	-2569	Slc14a2
chr18	81132058	81132561	0.949513	0.339081	-1.48556	ENSMUST00000025458	-1262	Atp9b
chr19	18747364	18748352	2.2443	1.18678	-0.91921	ENSMUST00000025632	2096	2410127L17Rik
chr19	30623463	30624113	1.38111	0.339081	-2.02613	ENSMUST00000025803	43	Dkk1
chr13	120252510	120253093	1.46743	0.339081	-2.11359	ENSMUST00000026519	946	4833420G17Rik
chr7	80663546	80664166	1.12215	0.339081	-1.72657	ENSMUST00000026895	309	Chd2
chr5	139226024	139226466	0.949513	0.169541	-2.48556	ENSMUST00000026972	-4002	Fam20c
chr1	67168557	67169055	1.03583	0.339081	-1.61109	ENSMUST00000027144	-545	Cps1
chr1	58853674	58854102	0.949513	0.169541	-2.48556	ENSMUST00000027189	1458	Casp8
chr1	34551762	34552390	1.12215	0.169541	-2.72657	ENSMUST00000027299	-2885	Prss39
chr1	34212389	34212887	0.949513	0.508622	-0.900594	ENSMUST00000027309	-4290	Dst
chr18	62483524	62484210	1.29479	0.678163	-0.933016	ENSMUST00000027560	0	Htr4
chr1	155587435	155589016	3.1075	1.01724	-1.61109	ENSMUST00000027748	0	Rgs16
chr1	180251324	180251867	1.03583	0.339081	-1.61109	ENSMUST00000027781	2065	Fam36a
chr2	30806290	30807115	1.46743	0.169541	-3.11359	ENSMUST00000028199	-1364	Tor1b
chr2	24331254	24331855	1.12215	0.339081	-1.72657	ENSMUST00000028355	-136	Pax8
chr2	76199851	76200326	1.03583	0.508622	-1.02613	ENSMUST00000028430	-1345	Cyct
chr2	103639868	103640405	1.12215	0.508622	-1.1416	ENSMUST00000028607	-2063	Caprin1
chr2	122441962	122442721	1.64007	0.847703	-0.952125	ENSMUST00000028624	-4924	Gatm
chr2	120797437	120798040	1.55375	0.339081	-2.19605	ENSMUST00000028728	-987	Ubr1
chr2	126756156	126756692	0.949513	0.169541	-2.48556	ENSMUST00000028844	2280	2010106G01Rik
chr2	127680142	127680836	1.89903	1.01724	-0.900594	ENSMUST00000028859	0	Acoxl
chr2	144427103	144427730	1.12215	0.339081	-1.72657	ENSMUST00000028917	1472	Dtd1
chr2	155575104	155575687	1.20847	0.339081	-1.83348	ENSMUST00000029140	-1166	Procr
chr2	156709979	156710652	1.29479	0.678163	-0.933016	ENSMUST00000029164	2163	Sla2
chr3	81799527	81800153	1.20847	0.169541	-2.83348	ENSMUST00000029641	-691	Accn5
chr3	131748028	131749004	2.2443	1.18678	-0.91921	ENSMUST00000029665	0	Dkk2
chr3	94281617	94282287	1.64007	0.847703	-0.952125	ENSMUST00000029784	-466	Celf3
chr3	135351227	135351656	1.03583	0.339081	-1.61109	ENSMUST00000029812	2855	Nfkb1
chr3	134491536	134492153	1.12215	0.508622	-1.1416	ENSMUST00000029822	0	Tacr3
chr3	145307502	145309454	5.43812	2.20403	-1.30297	ENSMUST00000029846	3496	Cyr61
chr4	14788050	14788604	1.03583	0.339081	-1.61109	ENSMUST00000029875	-2619	Tmem55a
chr4	21805515	21806062	0.949513	0.508622	-0.900594	ENSMUST00000029909	-758	Coq3
chr3	144690905	144691445	1.20847	0.339081	-1.83348	ENSMUST00000029919	4296	Clca3
chr4	68615450	68616403	2.76222	0.678163	-2.02613	ENSMUST00000030036	-20	Dbc1
chr4	57449092	57450274	2.6759	1.35633	-0.980322	ENSMUST00000030049	1747	Palm2
chr4	66061958	66062922	1.81271	0.169541	-3.41844	ENSMUST00000030064	2579	Astn2
chr4	137883594	137884312	2.58958	0.508622	-2.34805	ENSMUST00000030536	-1373	Pink1
chr4	133795450	133796128	1.38111	0.508622	-1.44116	ENSMUST00000030645	-1137	Cnksr1
chr4	131391993	131392564	1.38111	0.508622	-1.44116	ENSMUST00000030741	1583	Ptpru
chr5	24351604	24352048	0.949513	0.169541	-2.48556	ENSMUST00000030787	-3163	Rheb
chr5	45564987	45565632	1.20847	0.508622	-1.24852	ENSMUST00000030975	-4185	4930435H24Rik
chr5	32443694	32444240	0.949513	0.169541	-2.48556	ENSMUST00000031017	4851	Fosl2
chr5	31521312	31521948	1.46743	0.678163	-1.11359	ENSMUST00000031032	971	Ppm1g
chr5	100116816	100117436	1.55375	0.339081	-2.19605	ENSMUST00000031274	4800	4930522N08Rik
chr6	56875460	56876180	1.46743	0.169541	-3.11359	ENSMUST00000031793	-1535	Nt5c3
chr6	35488090	35488676	1.12215	0.339081	-1.72657	ENSMUST00000031866	1213	Mtpn
chr6	129342925	129343532	1.29479	0.508622	-1.34805	ENSMUST00000032262	-3783	Clec1b
chr6	119775968	119776392	0.949513	0.508622	-0.900594	ENSMUST00000032279	-725	Erc1
chr6	130183968	130184569	1.12215	0.339081	-1.72657	ENSMUST00000032286	-629	Klra7
chr6	125448327	125448900	1.20847	0.169541	-2.83348	ENSMUST00000032492	-3519	Cd9
chr7	86879307	86879839	1.12215	0.339081	-1.72657	ENSMUST00000032762	-1646	Plin1
chr7	134269844	134270240	0.949513	0.169541	-2.48556	ENSMUST00000032912	-4105	Qprt
chr7	119302396	119303051	1.29479	0.339081	-1.93302	ENSMUST00000033036	0	Dkk3
chrX	70703023	70705292	5.7834	2.20403	-1.39177	ENSMUST00000033737	0	Haus7
chrX	70655819	70656434	1.29479	0.339081	-1.93302	ENSMUST00000033740	0	Zfp92
chr8	13886265	13886735	1.03583	0.169541	-2.61109	ENSMUST00000033839	3537	2410022L05Rik
chr8	23865202	23865741	1.20847	0.508622	-1.24852	ENSMUST00000033941	-2475	Plat
chr8	97959959	97960559	1.29479	0.169541	-2.93302	ENSMUST00000034249	-1191	Gtl3
chr9	53071996	53073065	2.58958	1.35633	-0.933016	ENSMUST00000034550	0	4930510E17Rik
chr9	50662647	50663263	1.20847	0.508622	-1.24852	ENSMUST00000034560	-1766	Ppp2r1b
chr9	45076792	45077479	1.38111	0.508622	-1.44116	ENSMUST00000034594	0	Il10ra
chr9	61922743	61923859	1.89903	1.01724	-0.900594	ENSMUST00000034785	-4331	Glce
chr9	95853412	95853922	1.12215	0.508622	-1.1416	ENSMUST00000034981	-1257	Xrn1
chr9	115215257	115215795	1.12215	0.508622	-1.1416	ENSMUST00000035010	3745	Stt3b
chr9	110846622	110847312	1.64007	0.847703	-0.952125	ENSMUST00000035075	1351	Tdgf1
chr6	117853505	117854049	1.12215	0.169541	-2.72657	ENSMUST00000035493	-2751	Hnrnpf
chr17	24684930	24685464	1.03583	0.508622	-1.02613	ENSMUST00000035565	-1431	Pkd1
chr9	56707350	56707955	1.20847	0.169541	-2.83348	ENSMUST00000035661	-4956	Cspg4
chr11	102134964	102135496	0.949513	0.508622	-0.900594	ENSMUST00000036467	4909	Asb16
chr9	64870667	64871209	1.20847	0.508622	-1.24852	ENSMUST00000036615	-1144	Ptplad1
chr4	134827111	134828678	6.38764	2.88219	-1.14812	ENSMUST00000037099	52	Clic4
chr7	28311336	28311970	1.46743	0.508622	-1.52863	ENSMUST00000037134	-108	Hipk4
chr2	71289871	71290407	1.12215	0.508622	-1.1416	ENSMUST00000037210	-926	Metap1d
chr2	90619372	90619986	1.29479	0.339081	-1.93302	ENSMUST00000037219	-2898	Agbl2
chr7	86416099	86416722	1.12215	0.339081	-1.72657	ENSMUST00000037315	-1365	Abhd2
chr11	98719895	98720556	1.38111	0.678163	-1.02613	ENSMUST00000037480	-4396	Wipf2
chr10	122510922	122511508	1.20847	0.169541	-2.83348	ENSMUST00000037557	2054	Mon2
chr14	55559366	55559890	0.949513	0.339081	-1.48556	ENSMUST00000037814	4061	Cmtm5
chr11	98659205	98659732	0.949513	0.508622	-0.900594	ENSMUST00000037930	-236	Msl1
chr3	146602231	146603083	1.89903	0.678163	-1.48556	ENSMUST00000037942	-3928	Ttll7
chr2	118423189	118424991	7.16451	3.72989	-0.941733	ENSMUST00000038341	0	Bub1b
chr10	96083943	96084479	1.03583	0.339081	-1.61109	ENSMUST00000038377	4310	Btg1
chr3	106900208	106900751	1.38111	0.678163	-1.02613	ENSMUST00000038695	-3734	Kcna2
chr15	81765078	81765721	1.20847	0.339081	-1.83348	ENSMUST00000038757	-1468	Csdc2
chr4	139801983	139802642	1.72639	0.678163	-1.34805	ENSMUST00000039331	58	Igsf21
chr14	80172008	80172633	1.20847	0.339081	-1.83348	ENSMUST00000039568	-890	Pcdh8
chr1	141313537	141314102	1.12215	0.508622	-1.1416	ENSMUST00000039867	-4858	Zbtb41
chr10	126495691	126496269	1.12215	0.508622	-1.1416	ENSMUST00000040307	972	2009-03-01
chr15	78941310	78941981	1.46743	0.678163	-1.11359	ENSMUST00000040320	1899	Micall1
chr13	34440151	34440875	1.55375	0.508622	-1.61109	ENSMUST00000040336	-3101	Slc22a23
chr18	9215492	9216798	2.41694	0.847703	-1.51155	ENSMUST00000041080	2640	Fzd8
chr10	100055016	100055528	1.12215	0.169541	-2.72657	ENSMUST00000041162	0	1700017N19Rik
chr4	51234308	51234987	1.12215	0.339081	-1.72657	ENSMUST00000041392	4760	Cylc2
chr12	37040566	37041241	1.38111	0.678163	-1.02613	ENSMUST00000041407	0	Sostdc1
chr10	77930016	77930526	0.949513	0.508622	-0.900594	ENSMUST00000041616	-2297	Pdxk
chr17	24129895	24131380	4.83389	2.20403	-1.13304	ENSMUST00000041649	3688	Prss22
chr8	77513579	77514133	1.12215	0.169541	-2.72657	ENSMUST00000041759	-3122	Hmgxb4
chr16	3844492	3845178	1.38111	0.508622	-1.44116	ENSMUST00000041778	-2090	Zfp174
chr9	99257413	99257980	1.12215	0.339081	-1.72657	ENSMUST00000042158	970	Esyt3
chr9	42212743	42213351	1.12215	0.508622	-1.1416	ENSMUST00000042190	-4732	Tecta
chr8	24779794	24780717	2.50326	1.01724	-1.29914	ENSMUST00000042352	0	Zmat4
chr2	6271828	6272463	1.20847	0.339081	-1.83348	ENSMUST00000042503	-1316	Usp6nl
chr6	72185004	72185939	1.98535	1.01724	-0.964725	ENSMUST00000042646	0	Atoh8
chr1	97562920	97564987	6.81923	2.88219	-1.24244	ENSMUST00000043336	0	St8sia4
chr14	35634766	35635293	0.949513	0.508622	-0.900594	ENSMUST00000043349	1757	Grid1
chr16	35367100	35367732	1.38111	0.169541	-3.02613	ENSMUST00000043521	-3097	Sec22a
chr12	101963510	101964337	2.41694	1.01724	-1.24852	ENSMUST00000043599	-273	Rps6ka5
chr11	101016686	101017844	5.3518	2.20403	-1.27988	ENSMUST00000043654	0	Tubg2
chr5	140291448	140292071	1.38111	0.508622	-1.44116	ENSMUST00000044002	-1212	Tmem184a
chr8	108008382	108008945	0.949513	0.339081	-1.48556	ENSMUST00000044286	-53	Zdhhc1
chr15	78683404	78683907	0.949513	0.508622	-0.900594	ENSMUST00000044584	2053	Lgals2
chr1	188795628	188796243	1.20847	0.169541	-2.83348	ENSMUST00000045108	4335	D1Pas1
chr19	46073756	46074265	1.03583	0.169541	-2.61109	ENSMUST00000045131	-779	9130011E15Rik
chr3	97568057	97568654	1.20847	0.508622	-1.24852	ENSMUST00000045243	3284	Pde4dip
chr13	23647466	23648615	4.22965	1.86495	-1.1814	ENSMUST00000045301	567	Hist1h1d
chr3	31051234	31051877	1.38111	0.169541	-3.02613	ENSMUST00000046174	2368	Cldn11
chr8	88222467	88223332	1.89903	0.678163	-1.48556	ENSMUST00000047344	1322	Neto2
chr6	53240083	53240824	1.72639	0.847703	-1.02613	ENSMUST00000047462	2796	9430076C15Rik
chr6	32536100	32536612	1.03583	0.508622	-1.02613	ENSMUST00000047622	1581	Plxna4
chr4	147666673	147667200	1.12215	0.339081	-1.72657	ENSMUST00000047720	-4600	Ptchd2
chr8	87954324	87954905	1.12215	0.508622	-1.1416	ENSMUST00000047749	1836	4921524J17Rik
chr10	116332492	116333012	1.03583	0.339081	-1.61109	ENSMUST00000048229	924	Gm239
chr1	186707883	186708441	0.949513	0.339081	-1.48556	ENSMUST00000048308	-787	C130074G19Rik
chr9	53822166	53823021	2.33062	0.847703	-1.45908	ENSMUST00000048409	88	Elmod1
chr4	82530444	82531428	2.33062	0.678163	-1.78101	ENSMUST00000048430	0	Cer1
chr1	186630991	186632265	2.2443	1.18678	-0.91921	ENSMUST00000048462	2812	Mosc1
chr5	89956645	89957140	0.949513	0.169541	-2.48556	ENSMUST00000048557	193	Npffr2
chr1	186556544	186557284	1.98535	0.678163	-1.54969	ENSMUST00000048572	-47	Hlx
chr15	76745661	76746146	1.03583	0.169541	-2.61109	ENSMUST00000048854	2295	Zfp647
chr1	84693720	84694459	1.72639	0.508622	-1.76309	ENSMUST00000049126	-925	Dner
chr8	81028446	81028931	0.949513	0.169541	-2.48556	ENSMUST00000049245	3897	Rbmxrt
chr19	25309668	25310216	0.949513	0.169541	-2.48556	ENSMUST00000049400	-1249	Kank1
chr6	86386631	86387277	1.38111	0.678163	-1.02613	ENSMUST00000050497	-1091	C87436
chr1	66670703	66671259	0.949513	0.169541	-2.48556	ENSMUST00000050986	-2511	Unc80
chr9	53110567	53111278	1.38111	0.169541	-3.02613	ENSMUST00000051014	794	Exph5
chr3	96077468	96078338	1.89903	0.847703	-1.16363	ENSMUST00000051089	3826	Hist2h2bb
chr18	37571167	37572147	3.28014	0.678163	-2.27405	ENSMUST00000051126	0	Pcdhb10
chr15	5087664	5089150	4.83389	1.35633	-1.83348	ENSMUST00000051186	-4711	Prkaa1
chr18	37460369	37460901	0.949513	0.339081	-1.48556	ENSMUST00000051754	0	Pcdhb3
chr10	61441027	61441560	1.20847	0.508622	-1.24852	ENSMUST00000051826	-159	Col13a1
chr18	36853095	36853553	1.03583	0.169541	-2.61109	ENSMUST00000052890	1984	E230025N22Rik
chr17	26550583	26551049	0.949513	0.339081	-1.48556	ENSMUST00000053020	-861	Neurl1b
chr10	25075586	25076196	1.03583	0.339081	-1.61109	ENSMUST00000053095	-3408	Epb4.1l2
chr12	32895443	32896748	2.93486	1.52587	-0.943663	ENSMUST00000053215	-1920	Pik3cg
chrX	132804092	132804783	1.29479	0.508622	-1.34805	ENSMUST00000053540	-17	Ngfrap1
chr17	88035424	88035980	1.12215	0.508622	-1.1416	ENSMUST00000053577	107	Epcam
chr6	97103644	97104180	1.03583	0.339081	-1.61109	ENSMUST00000054344	-4469	A130022J15Rik
chr2	154901853	154902377	0.949513	0.169541	-2.48556	ENSMUST00000054607	-1621	Ahcy
chr5	118614446	118614972	1.03583	0.508622	-1.02613	ENSMUST00000054836	-4801	Hrk
chr1	156943718	156944287	1.12215	0.508622	-1.1416	ENSMUST00000055322	2480	Ier5
chr19	5923738	5924853	4.40229	1.69541	-1.37662	ENSMUST00000055458	-4744	Cdc42ep2
chr1	123424423	123425077	1.20847	0.339081	-1.83348	ENSMUST00000055884	0	Htr5b
chr13	26864219	26864813	1.12215	0.508622	-1.1416	ENSMUST00000055915	-2186	Hdgfl1
chr17	24593862	24594563	1.20847	0.508622	-1.24852	ENSMUST00000056032	-1607	E4f1
chr16	89513299	89514153	1.98535	0.169541	-3.54969	ENSMUST00000056118	-4732	Krtap7-1
chr18	64501882	64503478	5.3518	2.71265	-0.980322	ENSMUST00000056719	1843	Onecut2
chrX	34446137	34446738	1.12215	0.339081	-1.72657	ENSMUST00000057093	-3244	Nkrf
chr17	9865291	9865970	1.12215	0.508622	-1.1416	ENSMUST00000057190	-2723	Pabpc6
chr9	77488382	77488999	1.03583	0.508622	-1.02613	ENSMUST00000057781	3845	Klhl31
chr7	113825161	113825702	0.949513	0.169541	-2.48556	ENSMUST00000057817	-3163	Olfr693
chr12	71929672	71930336	1.29479	0.169541	-2.93302	ENSMUST00000057859	3173	Frmd6
chr11	102467935	102468595	1.29479	0.339081	-1.93302	ENSMUST00000057893	2192	Fzd2
chr3	125644423	125644933	0.949513	0.169541	-2.48556	ENSMUST00000057944	-2956	Ugt8a
chr6	92760905	92761617	1.12215	0.169541	-2.72657	ENSMUST00000057977	-4855	A730049H05Rik
chr6	88843309	88843917	1.20847	0.508622	-1.24852	ENSMUST00000058011	4858	Mcm2
chr1	134397825	134398371	0.949513	0.169541	-2.48556	ENSMUST00000058167	-4436	Tmem81
chr14	70559997	70560639	1.38111	0.339081	-2.02613	ENSMUST00000058240	-689	9930012K11Rik
chr2	73151993	73152844	1.38111	0.508622	-1.44116	ENSMUST00000058615	-1236	Cir1
chr8	47381328	47381936	1.03583	0.508622	-1.02613	ENSMUST00000058636	-1304	Helt
chr12	121186046	121186641	1.20847	0.508622	-1.24852	ENSMUST00000058644	1613	Tmem196
chr7	46701372	46701958	1.38111	0.508622	-1.44116	ENSMUST00000059110	0	Gm5590
chr5	65323256	65323966	1.55375	0.678163	-1.19605	ENSMUST00000059349	35	Tlr1
chr15	97073075	97073695	1.29479	0.169541	-2.93302	ENSMUST00000059433	-3843	Fam113b
chr1	155695902	155696381	0.949513	0.339081	-1.48556	ENSMUST00000059607	1945	5830403L16Rik
chr15	27563509	27564432	2.50326	0.678163	-1.88411	ENSMUST00000059662	-3062	Fam105b
chr18	84259265	84260075	1.46743	0.508622	-1.52863	ENSMUST00000060223	1717	Zadh2
chr4	118365124	118365732	1.20847	0.169541	-2.83348	ENSMUST00000060562	-2057	Olfr1342
chr17	21401426	21402056	1.12215	0.508622	-1.1416	ENSMUST00000060603	4037	Vmn1r235
chr17	21027505	21028035	1.12215	0.169541	-2.72657	ENSMUST00000061278	0	Vmn1r231
chr1	7076666	7077251	1.03583	0.339081	-1.61109	ENSMUST00000061280	-1750	Pcmtd1
chr10	34003720	34004259	1.29479	0.678163	-0.933016	ENSMUST00000061372	1726	Tspyl1
chr2	12928184	12928816	1.12215	0.508622	-1.1416	ENSMUST00000061545	4559	C1ql3
chr10	129719247	129719845	1.12215	0.508622	-1.1416	ENSMUST00000061571	-1952	Neurod4
chr3	107139153	107139743	1.12215	0.339081	-1.72657	ENSMUST00000061772	-2563	Rbm15
chr1	173290447	173291802	5.43812	1.69541	-1.68148	ENSMUST00000061878	0	Klhdc9
chr13	23714115	23715721	7.25083	3.22127	-1.17052	ENSMUST00000062045	0	Hist1h1e
chr1	94417794	94418371	1.12215	0.508622	-1.1416	ENSMUST00000062353	-2703	Olfr1414
chr9	121846456	121847751	5.69708	1.69541	-1.74859	ENSMUST00000063103	0	1700048O20Rik
chr5	100590728	100591163	0.949513	0.169541	-2.48556	ENSMUST00000063192	-1902	Tmem150c
chr2	169954448	169955091	1.20847	0.169541	-2.83348	ENSMUST00000063710	1630	Zfp217
chr17	79311932	79312794	2.07167	0.508622	-2.02613	ENSMUST00000063817	-3045	1110001A16Rik
chr16	35571439	35572018	1.12215	0.508622	-1.1416	ENSMUST00000063964	1625	Gm5963
chr9	122797107	122797637	1.20847	0.169541	-2.83348	ENSMUST00000063980	0	Zfp167
chr18	32108744	32109501	2.76222	1.18678	-1.21877	ENSMUST00000064016	0	Gpr17
chr2	151906262	151906925	1.38111	0.339081	-2.02613	ENSMUST00000064061	-340	Scrt2
chr10	120750541	120751160	1.72639	0.678163	-1.34805	ENSMUST00000064107	-2297	Tbc1d30
chr4	104825941	104826420	0.949513	0.508622	-0.900594	ENSMUST00000064139	-3532	Ppap2b
chr19	29179530	29180061	0.949513	0.339081	-1.48556	ENSMUST00000064393	3667	Rcl1
chr9	120491310	120492596	4.48861	2.37357	-0.91921	ENSMUST00000064646	4849	5830454E08Rik
chr17	29418324	29419653	2.93486	1.01724	-1.52863	ENSMUST00000064683	0	BC004004
chr3	107435683	107436216	1.20847	0.508622	-1.24852	ENSMUST00000064759	-1056	Fam40a
chr2	30324057	30324851	1.98535	0.508622	-1.96472	ENSMUST00000065134	4869	Ier5l
chr4	35791173	35793138	9.66777	2.71265	-1.83348	ENSMUST00000065173	0	Lingo2
chr19	60303791	60304372	1.12215	0.169541	-2.72657	ENSMUST00000065286	-1192	D19Ertd737e
chr3	40820642	40821424	1.55375	0.339081	-2.19605	ENSMUST00000065411	-4437	Larp1b
chr5	104596279	104596852	1.38111	0.339081	-2.02613	ENSMUST00000065590	-2879	Dspp
chr1	174516176	174516728	1.03583	0.339081	-1.61109	ENSMUST00000065679	3972	Slamf8
chr7	106932474	106932957	1.03583	0.508622	-1.02613	ENSMUST00000065741	-2477	F730035P03Rik
chr17	87350183	87350776	1.03583	0.508622	-1.02613	ENSMUST00000065758	-2957	Atp6v1e2
chr6	116439978	116440882	1.89903	1.01724	-0.900594	ENSMUST00000065786	-2747	Olfr211
chr6	5063236	5063771	1.03583	0.169541	-2.61109	ENSMUST00000065842	0	Ppp1r9a
chr6	134834488	134834970	1.03583	0.508622	-1.02613	ENSMUST00000066107	2881	Gpr19
chr18	37890331	37890980	1.29479	0.339081	-1.93302	ENSMUST00000066149	4973	Pcdhga11
chr18	52848730	52849363	1.29479	0.508622	-1.34805	ENSMUST00000066193	-3970	Gykl1
chr1	164554901	164555772	2.15798	0.847703	-1.34805	ENSMUST00000066241	3343	Gm5705
chr3	105805844	105807223	3.36646	0.847703	-1.9896	ENSMUST00000066319	-1430	1700027A23Rik
chr9	26615195	26615747	1.20847	0.508622	-1.24852	ENSMUST00000066560	-1143	Glb1l2
chr3	105504116	105504728	1.12215	0.508622	-1.1416	ENSMUST00000066610	-2789	6530418L21Rik
chr8	74192144	74192712	1.20847	0.508622	-1.24852	ENSMUST00000066644	2835	Unc13a
chr9	101109183	101109942	1.38111	0.508622	-1.44116	ENSMUST00000066657	4226	Ppp2r3a
chr5	100629367	100629986	1.38111	0.678163	-1.02613	ENSMUST00000066813	3739	Gm9932
chr8	107178073	107178681	1.20847	0.169541	-2.83348	ENSMUST00000067136	1558	1700082M22Rik
chr17	56619425	56620213	1.29479	0.508622	-1.34805	ENSMUST00000067538	-3520	Ptprs
chr1	66861162	66861743	1.03583	0.339081	-1.61109	ENSMUST00000068168	2378	1110028C15Rik
chr1	181179901	181180315	1.29479	0.678163	-0.933016	ENSMUST00000068437	-931	Smyd3
chr19	40345029	40346348	3.88437	1.86495	-1.05855	ENSMUST00000068439	0	Pdlim1
chr7	103101829	103102347	1.12215	0.169541	-2.72657	ENSMUST00000068485	-4378	Gm9966
chr15	73252053	73252660	1.29479	0.678163	-0.933016	ENSMUST00000068756	962	Ptk2
chr16	91170957	91171542	1.20847	0.508622	-1.24852	ENSMUST00000068783	105	Gm9881
chr16	34902097	34902520	1.03583	0.508622	-1.02613	ENSMUST00000068988	1771	Mylk
chr7	105716443	105717116	1.20847	0.169541	-2.83348	ENSMUST00000069035	-4946	A630091E08Rik
chr14	104047312	104048565	3.1075	1.18678	-1.3887	ENSMUST00000069443	-880	Slain1
chr7	91822904	91823446	1.03583	0.169541	-2.61109	ENSMUST00000069537	4416	Zfand6
chr18	54023483	54024317	1.98535	0.508622	-1.96472	ENSMUST00000069597	1718	Csnk1g3
chr3	81730261	81730909	1.03583	0.169541	-2.61109	ENSMUST00000069880	-1877	Gm9989
chr3	106843326	106843876	1.20847	0.169541	-2.83348	ENSMUST00000070085	906	AI504432
chr19	32789561	32790295	1.81271	0.847703	-1.09651	ENSMUST00000070210	-2750	Atad1
chr15	40352665	40353898	2.76222	0.847703	-1.7042	ENSMUST00000070382	4926	Gm16294
chr3	55260414	55260960	0.949513	0.508622	-0.900594	ENSMUST00000070418	-4720	Dclk1
chr6	72249614	72250166	1.20847	0.169541	-2.83348	ENSMUST00000070437	-4453	Sftpb
chr4	129983691	129984317	1.20847	0.339081	-1.83348	ENSMUST00000070532	-1522	Fabp3
chr10	107601979	107602536	0.949513	0.169541	-2.48556	ENSMUST00000070663	2525	Ppp1r12a
chr17	57226105	57227869	5.86972	2.54311	-1.2067	ENSMUST00000071135	0	Tubb4
chr17	14845131	14845665	1.03583	0.339081	-1.61109	ENSMUST00000071282	-408	Gm3222
chr9	98757711	98758215	0.949513	0.169541	-2.48556	ENSMUST00000071302	703	Gm6406
chr14	84847798	84848597	1.98535	0.847703	-1.22776	ENSMUST00000071370	4430	Pcdh17
chr6	86312658	86313236	1.12215	0.169541	-2.72657	ENSMUST00000071492	-2441	Fam136a
chr9	72017464	72018579	4.83389	2.20403	-1.13304	ENSMUST00000071965	4209	Gm7866
chr2	30010746	30011257	1.03583	0.169541	-2.61109	ENSMUST00000072389	-3658	Slc39a1-ps
chr7	53635896	53636721	1.46743	0.678163	-1.11359	ENSMUST00000072514	4054	Myod1
chr3	96839051	96839614	0.949513	0.339081	-1.48556	ENSMUST00000072600	2714	Gja5
chr18	52772894	52773401	1.12215	0.339081	-1.72657	ENSMUST00000072666	-2168	Zfp474
chr19	24945311	24946266	2.93486	1.01724	-1.52863	ENSMUST00000073080	-3961	Gm10053
chr6	42324638	42325191	1.12215	0.508622	-1.1416	ENSMUST00000073387	-1372	Epha1
chr8	33028562	33029599	2.93486	1.52587	-0.943663	ENSMUST00000073884	0	Nrg1
chr11	70621898	70622446	0.949513	0.169541	-2.48556	ENSMUST00000074572	3616	A430084P05Rik
chr6	79970481	79971167	1.46743	0.678163	-1.11359	ENSMUST00000074662	846	Lrrtm4
chr10	125398116	125398719	1.46743	0.169541	-3.11359	ENSMUST00000074807	-4556	Lrig3
chr6	96068319	96068856	1.29479	0.169541	-2.93302	ENSMUST00000075080	3016	Fam19a1
chr18	20213233	20213786	0.949513	0.339081	-1.48556	ENSMUST00000075214	4194	Dsc2
chr10	57684913	57685325	1.12215	0.508622	-1.1416	ENSMUST00000075305	950	Dux
chr10	94968555	94969046	0.949513	0.508622	-0.900594	ENSMUST00000075829	-3995	Mrpl42
chr6	132706145	132706775	1.12215	0.169541	-2.72657	ENSMUST00000076150	1399	Tas2r124
chr5	24501271	24502355	2.84854	1.01724	-1.48556	ENSMUST00000076306	0	Prkag2
chr3	60329735	60330496	1.55375	0.169541	-3.19605	ENSMUST00000076983	-2575	Mbnl1
chr11	47192056	47192933	1.81271	0.508622	-1.83348	ENSMUST00000077221	92	Sgcd
chr6	83112493	83113427	1.81271	0.847703	-1.09651	ENSMUST00000077407	-2487	Dctn1
chr9	110730431	110730998	1.03583	0.169541	-2.61109	ENSMUST00000077549	1239	Prss43
chr3	67177326	67177933	1.20847	0.508622	-1.24852	ENSMUST00000077916	-86	Mlf1
chr6	48592509	48593642	2.76222	1.35633	-1.02613	ENSMUST00000078223	-3591	Gimap8
chrX	108009656	108010126	1.12215	0.508622	-1.1416	ENSMUST00000078229	0	Pou3f4
chr10	129613559	129614351	1.72639	0.169541	-3.34805	ENSMUST00000078322	3584	Olfr826
chr19	48281437	48281937	1.12215	0.508622	-1.1416	ENSMUST00000078880	924	Sorcs3
chr16	24443282	24443852	1.12215	0.508622	-1.1416	ENSMUST00000078988	-4325	Lpp
chr5	121459214	121459771	1.38111	0.339081	-2.02613	ENSMUST00000079204	0	Rph3a
chr1	191161624	191162150	1.03583	0.339081	-1.61109	ENSMUST00000079451	4818	Kcnk2
chr5	120119872	120120440	1.46743	0.339081	-2.11359	ENSMUST00000079719	-238	Tbx3
chr19	7680990	7681808	1.46743	0.678163	-1.11359	ENSMUST00000079902	0	Lgals12
chrX	13783551	13784061	1.20847	0.339081	-1.83348	ENSMUST00000079952	-4213	Gm5382
chr12	56662309	56662915	1.03583	0.339081	-1.61109	ENSMUST00000080123	-3311	Aldoart2
chr8	109035087	109036027	2.33062	1.01724	-1.19605	ENSMUST00000080797	276	Cdh3
chr13	23630928	23631450	1.03583	0.169541	-2.61109	ENSMUST00000080859	3639	Hist1h3g
chr6	12055461	12055967	1.12215	0.169541	-2.72657	ENSMUST00000080891	3617	Gm6578
chr2	181493377	181493904	1.03583	0.508622	-1.02613	ENSMUST00000081125	-4133	Myt1
chr1	22601888	22602560	1.38111	0.169541	-3.02613	ENSMUST00000081544	863	Rims1
chr12	32632294	32632882	1.12215	0.169541	-2.72657	ENSMUST00000081639	2519	Hbp1
chr2	154013085	154013755	1.38111	0.339081	-2.02613	ENSMUST00000081816	-2799	U46068
chr5	77543909	77544748	2.2443	1.01724	-1.1416	ENSMUST00000081964	0	Hopx
chr16	89416330	89416982	1.46743	0.678163	-1.11359	ENSMUST00000082065	3341	Krtap6-2
chr4	109202688	109203761	3.1075	1.35633	-1.19605	ENSMUST00000082306	49	4930522H14Rik
chr4	116863416	116864222	1.46743	0.339081	-2.11359	ENSMUST00000082496	871	U5
chr6	115754037	115754761	1.29479	0.169541	-2.93302	ENSMUST00000082629	3372	Snora7a
chr2	119564248	119564833	1.03583	0.339081	-1.61109	ENSMUST00000082788	1860	SNORA44
chr2	80693447	80694306	1.89903	0.339081	-2.48556	ENSMUST00000083207	3004	SNORA46
chr4	66204425	66205256	1.81271	0.339081	-2.41844	ENSMUST00000083217	0	SNORA67
chr6	135531549	135532131	1.12215	0.339081	-1.72657	ENSMUST00000083253	-2079	SNORA36
chr9	112017225	112017984	1.72639	0.508622	-1.76309	ENSMUST00000083507	3236	Mir128-2
chr14	35712002	35712784	1.38111	0.678163	-1.02613	ENSMUST00000083547	4209	Mir346
chr3	118132996	118134699	4.66125	2.20403	-1.08057	ENSMUST00000083635	-2062	Mir137
chr11	86927023	86927561	1.03583	0.508622	-1.02613	ENSMUST00000083655	519	Mir301
chr3	68814850	68815604	1.38111	0.678163	-1.02613	ENSMUST00000083672	1028	Mir16-2
chr4	132638560	132639224	1.38111	0.169541	-3.02613	ENSMUST00000084243	-2165	Gm10151
chr4	64784357	64785473	3.02118	1.01724	-1.57045	ENSMUST00000084501	0	Pappa
chr7	117159750	117160423	1.20847	0.339081	-1.83348	ENSMUST00000084731	-1516	Ipo7
chr9	100979919	100980528	1.12215	0.508622	-1.1416	ENSMUST00000085177	1470	Msl2
chr1	190834300	190834859	1.03583	0.508622	-1.02613	ENSMUST00000085678	-2582	Kctd3
chr12	8976286	8976865	1.20847	0.508622	-1.24852	ENSMUST00000085745	-3833	Wdr35
chr5	125823491	125824236	1.46743	0.169541	-3.11359	ENSMUST00000086075	-2028	Scarb1
chr13	38083629	38084486	1.46743	0.678163	-1.11359	ENSMUST00000086842	1509	Ssr1
chr17	50376128	50377115	2.84854	1.35633	-1.07052	ENSMUST00000086914	-1614	AY702103
chr19	47043377	47043976	1.38111	0.678163	-1.02613	ENSMUST00000086961	0	Nt5c2
chr1	87858618	87859159	0.949513	0.339081	-1.48556	ENSMUST00000086975	-989	Gpr55
chr2	180978619	180979218	1.20847	0.169541	-2.83348	ENSMUST00000087446	-1888	BC006779
chr5	25267429	25268017	1.12215	0.169541	-2.72657	ENSMUST00000088244	1587	Actr3b
chr6	125014966	125015367	0.949513	0.339081	-1.48556	ENSMUST00000088292	-2571	Lpar5
chr1	24619396	24620154	6.90555	3.05173	-1.17813	ENSMUST00000088336	0	Gm10222
chr14	104245981	104246821	1.89903	0.678163	-1.48556	ENSMUST00000088530	-2592	Ednrb
chr2	127310177	127311084	1.64007	0.339081	-2.27405	ENSMUST00000088538	-1943	Kcnip3
chr17	21704731	21705235	1.12215	0.339081	-1.72657	ENSMUST00000088787	723	Zfp948
chr16	11069571	11070110	1.20847	0.339081	-1.83348	ENSMUST00000089011	3182	Snn
chr6	97008348	97009292	1.98535	0.678163	-1.54969	ENSMUST00000089295	1114	Fam19a4
chr15	41274533	41275681	2.93486	1.01724	-1.52863	ENSMUST00000090096	-3347	Oxr1
chr3	137878258	137878998	1.98535	0.678163	-1.54969	ENSMUST00000090171	-1789	Adh7
chr2	118379585	118380657	5.17916	0.508622	-3.34805	ENSMUST00000090219	-4163	Bmf
chr2	92277534	92278716	4.57493	2.03449	-1.16908	ENSMUST00000090559	-3335	Cry2
chr3	94965793	94966460	1.46743	0.678163	-1.11359	ENSMUST00000090823	1368	Sema6c
chr2	25093514	25094141	1.38111	0.169541	-3.02613	ENSMUST00000091318	-1208	Gm757
chr14	65995924	65996375	1.12215	0.339081	-1.72657	ENSMUST00000091349	1696	Zfp395
chr18	35370789	35371296	1.55375	0.678163	-1.19605	ENSMUST00000091636	3383	Lrrtm2
chr3	96052647	96053178	1.03583	0.339081	-1.61109	ENSMUST00000091711	1975	Hist2h3c1
chr13	19793476	19794061	1.12215	0.169541	-2.72657	ENSMUST00000091763	-3814	Txndc3
chr10	32605717	32606139	1.03583	0.169541	-2.61109	ENSMUST00000092602	4130	Nkain2
chr10	28935936	28936539	1.20847	0.339081	-1.83348	ENSMUST00000092627	4489	9330159F19Rik
chr11	86991379	86991993	1.12215	0.169541	-2.72657	ENSMUST00000092807	-3958	Trim37
chr15	68705908	68706415	1.03583	0.339081	-1.61109	ENSMUST00000093430	-805	Gm7125
chr8	97490519	97491180	1.55375	0.339081	-2.19605	ENSMUST00000093603	2477	Gm10286
chr19	46418884	46419455	1.03583	0.508622	-1.02613	ENSMUST00000093619	1634	Mir146b
chr1	171859804	171860487	1.38111	0.508622	-1.44116	ENSMUST00000094348	1027	1700084C01Rik
chr11	20639451	20639956	1.29479	0.678163	-0.933016	ENSMUST00000094376	1547	Aftph
chr5	111847726	111848303	1.12215	0.508622	-1.1416	ENSMUST00000094463	1266	Mn1
chr5	107353441	107354002	1.12215	0.339081	-1.72657	ENSMUST00000094545	908	Hfm1
chr7	17579879	17580436	1.03583	0.339081	-1.61109	ENSMUST00000094805	1824	Ccdc8
chr4	105991885	105992462	1.12215	0.508622	-1.1416	ENSMUST00000094933	3048	Usp24
chr4	59799116	59799704	1.03583	0.508622	-1.02613	ENSMUST00000095063	-2379	1110054O05Rik
chr10	41302733	41303249	1.55375	0.508622	-1.61109	ENSMUST00000095227	-3721	Ccdc162
chr8	47342943	47343622	1.20847	0.508622	-1.24852	ENSMUST00000095320	-1912	Gm10313
chr6	124832474	124833027	0.949513	0.169541	-2.48556	ENSMUST00000095454	-2764	Cd4
chr13	30752982	30753647	1.55375	0.169541	-3.19605	ENSMUST00000095914	1005	Dusp22
chr14	35009296	35009966	1.38111	0.678163	-1.02613	ENSMUST00000096019	4854	Gprin2
chr19	46393435	46393842	1.20847	0.508622	-1.24852	ENSMUST00000096029	-1095	Psd
chr19	21854303	21855078	1.72639	0.678163	-1.34805	ENSMUST00000096194	1473	Tmem2
chrX	66073649	66074980	5.43812	2.37357	-1.19605	ENSMUST00000096420	0	Gm14698
chr3	46858693	46859254	1.12215	0.169541	-2.72657	ENSMUST00000097152	-3131	Gm10356
chr17	66664573	66665495	1.81271	0.847703	-1.09651	ENSMUST00000097292	3392	Gm10495
chr17	56435738	56436456	1.55375	0.508622	-1.61109	ENSMUST00000097303	3254	Arrdc5
chr1	196800333	196800886	1.03583	0.339081	-1.61109	ENSMUST00000097434	-1683	A330023F24Rik
chr18	60885156	60885779	1.20847	0.339081	-1.83348	ENSMUST00000097564	1439	Ndst1
chr18	45441491	45442047	1.03583	0.508622	-1.02613	ENSMUST00000097581	3716	Gm10540
chr1	133420145	133420878	1.46743	0.678163	-1.11359	ENSMUST00000097588	3061	Srgap2
chr18	36684516	36685738	3.28014	1.18678	-1.4667	ENSMUST00000097616	-2067	Slc4a9
chr1	95719576	95720162	1.03583	0.169541	-2.61109	ENSMUST00000097633	-1655	D2hgdh
chr18	21058395	21058978	1.20847	0.169541	-2.83348	ENSMUST00000097658	-3817	Trappc8
chr1	85093642	85094174	0.949513	0.508622	-0.900594	ENSMUST00000097669	-2565	Gm10553
chr1	9956248	9956865	1.12215	0.508622	-1.1416	ENSMUST00000097824	-3359	Gm10567
chr4	135451909	135452421	1.38111	0.508622	-1.44116	ENSMUST00000097843	602	Cnr2
chr4	129532335	129532866	1.03583	0.339081	-1.61109	ENSMUST00000097869	22	Gm10571
chr4	128918336	128919110	1.81271	0.847703	-1.09651	ENSMUST00000097873	-1919	C77080
chr7	142126077	142126601	1.03583	0.339081	-1.61109	ENSMUST00000097984	3293	Fam196a
chr7	110044968	110045469	0.949513	0.339081	-1.48556	ENSMUST00000098215	-3387	Olfr570
chr7	67284919	67285501	1.29479	0.678163	-0.933016	ENSMUST00000098402	0	Snrpn
chr7	25934842	25935664	1.29479	0.678163	-0.933016	ENSMUST00000098678	-1812	D930028M14Rik
chr9	53916289	53917208	1.72639	0.339081	-2.34805	ENSMUST00000098760	-72	Tnfaip8l3
chr8	19727739	19728226	1.03583	0.339081	-1.61109	ENSMUST00000098909	-1520	4930467E23Rik
chr3	90347677	90348413	1.46743	0.508622	-1.52863	ENSMUST00000098910	2596	S100a16
chr8	4322428	4323072	1.29479	0.169541	-2.93302	ENSMUST00000098950	2029	Elavl1
chr9	3011393	3011996	1.12215	0.508622	-1.1416	ENSMUST00000099051	-1174	Gm10721
chr2	166634623	166635509	1.38111	0.678163	-1.02613	ENSMUST00000099078	3537	Arfgef2
chr3	58957252	58957867	1.03583	0.508622	-1.02613	ENSMUST00000099088	0	F630111L10Rik
chr13	120280830	120282828	4.48861	1.35633	-1.72657	ENSMUST00000099147	0	Gm7120
chr2	154719631	154720193	1.03583	0.339081	-1.61109	ENSMUST00000099173	-961	Eif2s2
chr2	152755593	152756094	0.949513	0.339081	-1.48556	ENSMUST00000099200	2851	Foxs1
chr2	148272237	148272745	0.949513	0.339081	-1.48556	ENSMUST00000099269	-2939	Cd93
chr2	130525399	130525993	1.12215	0.169541	-2.72657	ENSMUST00000099362	-2145	Slc4a11
chr10	90041652	90042237	1.03583	0.339081	-1.61109	ENSMUST00000099366	2218	Anks1b
chr13	54848831	54849356	1.12215	0.169541	-2.72657	ENSMUST00000099506	1675	Gprin1
chr19	34680264	34680791	0.949513	0.339081	-1.48556	ENSMUST00000099507	-1630	I830012O16Rik
chr19	22213197	22213980	1.55375	0.508622	-1.61109	ENSMUST00000099569	0	Trpm3
chr13	29039505	29040174	1.46743	0.339081	-2.11359	ENSMUST00000099654	2838	Sox4
chr2	87843535	87844067	0.949513	0.169541	-2.48556	ENSMUST00000099839	2867	Olfr1160
chr13	9493306	9493891	1.29479	0.169541	-2.93302	ENSMUST00000099913	959	Dip2c
chr2	85513640	85514254	1.29479	0.169541	-2.93302	ENSMUST00000099917	1077	Olfr1006
chr2	76819688	76820258	1.03583	0.169541	-2.61109	ENSMUST00000099981	255	Ttn
chr15	100496550	100497176	1.38111	0.508622	-1.44116	ENSMUST00000100198	2758	Bin2
chr15	99870606	99871890	2.58958	1.01724	-1.34805	ENSMUST00000100203	1513	Dip2b
chr11	105319399	105320056	1.29479	0.678163	-0.933016	ENSMUST00000100332	-1351	2010-03-01
chr14	70012287	70012948	1.29479	0.508622	-1.34805	ENSMUST00000100420	3006	Loxl2
chr11	77909549	77910876	3.28014	1.01724	-1.68909	ENSMUST00000100782	1341	BC017647
chr11	74435757	74436288	0.949513	0.169541	-2.48556	ENSMUST00000100866	2652	E130309D14Rik
chr5	31015691	31016331	1.12215	0.339081	-1.72657	ENSMUST00000101442	1419	Dpysl5
chrX	39881345	39882107	1.29479	0.508622	-1.34805	ENSMUST00000101619	1585	Gm10483
chr7	67007257	67007794	1.03583	0.508622	-1.02613	ENSMUST00000101898	-548	SNORD116
chr10	75664882	75665359	0.949513	0.508622	-0.900594	ENSMUST00000102114	4796	Mir678
chr18	75072144	75072792	1.20847	0.508622	-1.24852	ENSMUST00000102274	-2258	AC155261.1
chr13	62860794	62861496	1.29479	0.508622	-1.34805	ENSMUST00000102295	-603	Mir713
chr11	77275343	77276048	1.29479	0.678163	-0.933016	ENSMUST00000102493	0	Coro6
chr4	137415357	137415860	1.03583	0.169541	-2.61109	ENSMUST00000102518	-2292	Ece1
chr4	129252159	129253103	1.81271	0.847703	-1.09651	ENSMUST00000102596	-1275	Lck
chr2	66099075	66099710	1.64007	0.169541	-3.27405	ENSMUST00000102718	-4402	Ttc21b
chr2	61883860	61884458	1.20847	0.508622	-1.24852	ENSMUST00000102735	-61	Slc4a10
chr2	60049450	60049927	0.949513	0.508622	-0.900594	ENSMUST00000102747	1322	2007-03-01
chr11	52171387	52172268	2.15798	1.01724	-1.08502	ENSMUST00000102758	-2094	Vdac1
chr11	44287222	44287914	1.20847	0.169541	-2.83348	ENSMUST00000102795	-3223	Ublcp1
chr9	37213005	37213579	1.12215	0.169541	-2.72657	ENSMUST00000102895	3376	Robo4
chr13	23675984	23677590	7.85506	3.56035	-1.1416	ENSMUST00000102968	2519	Hist1h4d
chr13	23643538	23644291	1.46743	0.508622	-1.52863	ENSMUST00000102971	-22	Hist1h4f
chr13	21841617	21843162	4.48861	2.20403	-1.02613	ENSMUST00000102983	0	Hist1h4k
chr2	158491613	158492484	1.89903	0.508622	-1.90059	ENSMUST00000103116	0	Ppp1r16b
chr6	68473220	68473733	0.949513	0.169541	-2.48556	ENSMUST00000103325	4216	Igkv14-100
chr13	19273467	19273938	1.03583	0.169541	-2.61109	ENSMUST00000103554	-2912	Tcrg-V4
chr14	54423430	54424060	1.38111	0.169541	-3.02613	ENSMUST00000103672	-2140	Trav17
chr14	54744827	54745824	2.50326	0.678163	-1.88411	ENSMUST00000103682	2016	Trdj1
chr13	110111850	110112646	1.55375	0.678163	-1.19605	ENSMUST00000103758	-2292	Mir582
chr5	104723607	104724128	1.03583	0.508622	-1.02613	ENSMUST00000103945	-2079	AC122775.1
chr6	22737597	22738239	1.38111	0.678163	-1.02613	ENSMUST00000103946	-1579	AC134445.1
chr4	56913534	56914133	1.03583	0.339081	-1.61109	ENSMUST00000103982	-2906	SNORA43
chr7	135922586	135923615	2.84854	1.18678	-1.26316	ENSMUST00000104095	-4110	n-R5s158
chr1	24558283	24560145	4.31597	0.847703	-2.34805	ENSMUST00000104275	-2468	SNORA64
chr13	76739205	76739730	1.12215	0.169541	-2.72657	ENSMUST00000104507	3982	SNORA17
chr10	59703647	59704412	1.46743	0.508622	-1.52863	ENSMUST00000104653	-45	AC155640.2
chr2	93019980	93020818	1.46743	0.678163	-1.11359	ENSMUST00000104691	2314	AL683882.1
chr8	99184812	99185654	1.89903	0.508622	-1.90059	ENSMUST00000104745	4785	AC128668.1
chr7	110459885	110460466	1.38111	0.169541	-3.02613	ENSMUST00000104880	1650	Olfr596
chr1	52142756	52143415	1.46743	0.678163	-1.11359	ENSMUST00000105087	4496	Gm3940
chr10	80136885	80137523	1.29479	0.169541	-2.93302	ENSMUST00000105337	1516	Mknk2
chr10	61175964	61176559	1.03583	0.508622	-1.02613	ENSMUST00000105455	-1452	Aifm2
chr10	49504580	49505326	1.38111	0.339081	-2.02613	ENSMUST00000105485	-1366	Grik2
chr10	20669973	20670527	0.949513	0.339081	-1.48556	ENSMUST00000105525	-1864	Ahi1
chr4	147187299	147188089	1.98535	1.01724	-0.964725	ENSMUST00000105734	-3405	Gm13157
chr4	145699286	145700284	1.89903	0.678163	-1.48556	ENSMUST00000105735	-3275	Gm13247
chr4	137806430	137807038	1.03583	0.508622	-1.02613	ENSMUST00000105823	53	Sh2d5
chr4	137154791	137155326	1.20847	0.508622	-1.24852	ENSMUST00000105838	4650	Usp48
chr4	134468867	134469512	1.29479	0.508622	-1.34805	ENSMUST00000105863	1419	Tmem50a
chr4	134022775	134026225	17.1776	8.81611	-0.96231	ENSMUST00000105868	0	Stmn1
chr4	126847823	126849046	3.19382	1.52587	-1.06565	ENSMUST00000106094	-1078	Dlgap3
chr3	146432514	146433736	3.62541	1.86495	-0.959011	ENSMUST00000106137	0	Prkacb
chr3	117276437	117277139	1.29479	0.678163	-0.933016	ENSMUST00000106473	-1006	4833424O15Rik
chr4	109964566	109965286	1.29479	0.508622	-1.34805	ENSMUST00000106601	42	Elavl4
chr7	123170453	123171129	1.55375	0.339081	-2.19605	ENSMUST00000106612	3433	Sox6
chr11	109402722	109403233	0.949513	0.339081	-1.48556	ENSMUST00000106696	-1835	Arsg
chr4	102093186	102095105	5.09284	2.54311	-1.00188	ENSMUST00000106904	0	Pde4b
chr7	109206077	109206621	0.949513	0.339081	-1.48556	ENSMUST00000106953	2370	Rnf121
chr11	104138318	104138852	1.03583	0.508622	-1.02613	ENSMUST00000106989	-4843	Mapt
chr3	97432242	97433007	1.81271	0.508622	-1.83348	ENSMUST00000107050	0	Fmo5
chr4	96454061	96454603	0.949513	0.339081	-1.48556	ENSMUST00000107071	-2185	Gm12695
chr7	89081578	89082101	1.03583	0.508622	-1.02613	ENSMUST00000107305	-2220	Hdgfrp3
chr7	83550568	83551120	0.949513	0.339081	-1.48556	ENSMUST00000107442	-4828	Agbl1
chr4	53455073	53455754	1.12215	0.508622	-1.1416	ENSMUST00000107647	1519	Slc44a1
chr7	53066928	53067466	0.949513	0.169541	-2.48556	ENSMUST00000107726	1783	Cyth2
chr7	38894198	38894640	1.03583	0.508622	-1.02613	ENSMUST00000108023	-1646	Ccne1
chr3	37620681	37621087	0.949513	0.508622	-0.900594	ENSMUST00000108105	2165	Gm5148
chr11	81991352	81991901	0.949513	0.339081	-1.48556	ENSMUST00000108189	1414	Ccl1
chr4	25730609	25731218	1.12215	0.339081	-1.72657	ENSMUST00000108199	-3219	Fut9
chr3	26540787	26541528	1.29479	0.169541	-2.93302	ENSMUST00000108305	4217	Spata16
chr11	68827539	68828078	0.949513	0.339081	-1.48556	ENSMUST00000108667	-1335	1500010J02Rik
chr8	128017420	128017964	1.12215	0.508622	-1.1416	ENSMUST00000108775	-811	Sipa1l2
chr11	57460599	57461302	1.29479	0.169541	-2.93302	ENSMUST00000108846	1634	Galnt10
chr2	164796457	164797045	1.38111	0.678163	-1.02613	ENSMUST00000109311	2718	Slc12a5
chr2	163684133	163684649	1.29479	0.678163	-0.933016	ENSMUST00000109396	4666	Kcnk15
chr13	98207398	98207991	1.55375	0.678163	-1.19605	ENSMUST00000109431	2475	Gm11019
chr8	91216171	91216790	1.03583	0.508622	-1.02613	ENSMUST00000109622	-4137	Cyld
chr11	6098649	6099397	1.55375	0.339081	-2.19605	ENSMUST00000109806	789	Nudcd3
chr13	56807024	56807693	1.64007	0.339081	-2.27405	ENSMUST00000109874	1997	Smad5
chr13	47293706	47294178	1.03583	0.169541	-2.61109	ENSMUST00000110111	4336	Rnf144b
chr12	96936613	96937251	1.46743	0.678163	-1.11359	ENSMUST00000110117	3048	Flrt2
chr8	68141060	68143340	12.3437	1.18678	-3.37864	ENSMUST00000110259	0	2001-03-01
chr8	48435536	48436087	1.12215	0.169541	-2.72657	ENSMUST00000110367	1616	Stox2
chr5	151557988	151558595	1.20847	0.169541	-2.83348	ENSMUST00000110486	-283	Pds5b
chr5	148533194	148533737	1.03583	0.169541	-2.61109	ENSMUST00000110529	3828	Flt1
chr12	70995073	70995635	1.12215	0.339081	-1.72657	ENSMUST00000110570	-887	Map4k5
chr14	71317187	71317804	1.20847	0.508622	-1.24852	ENSMUST00000110968	427	Gfra2
chr1	178204859	178205501	1.64007	0.678163	-1.27405	ENSMUST00000111166	0	Pld5
chr14	58418662	58419256	1.12215	0.169541	-2.72657	ENSMUST00000111267	1189	Sap18
chr9	123832315	123833279	1.81271	0.678163	-1.41844	ENSMUST00000111443	-3581	Gm4694
chr2	90759283	90759786	1.03583	0.169541	-2.61109	ENSMUST00000111461	-869	Ptpmt1
chr1	159455151	159455787	1.29479	0.508622	-1.34805	ENSMUST00000111700	-491	Sec16b
chr6	135201951	135202487	1.03583	0.508622	-1.02613	ENSMUST00000111909	1702	Gsg1
chr2	69929883	69930388	0.949513	0.169541	-2.48556	ENSMUST00000112241	-3967	Myo3b
chr17	78602474	78603039	1.03583	0.339081	-1.61109	ENSMUST00000112498	2888	Crim1
chr14	17656089	17656563	0.949513	0.339081	-1.48556	ENSMUST00000112609	-4709	Rarb
chr5	103531016	103531511	0.949513	0.169541	-2.48556	ENSMUST00000112848	-1917	Mapk10
chrX	137210136	137210762	1.38111	0.169541	-3.02613	ENSMUST00000112993	-1805	Mid2
chr5	93033373	93034012	1.03583	0.339081	-1.61109	ENSMUST00000113065	1281	Stbd1
chr6	113032449	113033223	1.72639	0.169541	-3.34805	ENSMUST00000113157	4818	Setd5
chr19	7182337	7182962	1.64007	0.847703	-0.952125	ENSMUST00000113383	-2119	Flrt1
chr19	6930913	6931540	1.29479	0.508622	-1.34805	ENSMUST00000113440	1162	Ccdc88b
chr5	73146858	73147464	1.29479	0.508622	-1.34805	ENSMUST00000113604	-2847	Txk
chrX	99276213	99278620	6.81923	3.56035	-0.937589	ENSMUST00000113628	3188	Nhsl2
chr17	36197877	36198577	1.29479	0.678163	-0.933016	ENSMUST00000113742	-2562	Gm11127
chr16	96579022	96580112	3.19382	1.18678	-1.42822	ENSMUST00000113794	-3163	Igsf5
chr16	96453005	96453524	0.949513	0.169541	-2.48556	ENSMUST00000113800	-3884	B3galt5
chr1	74284113	74284797	1.29479	0.678163	-0.933016	ENSMUST00000113819	991	Arpc2
chr17	35321837	35322558	1.12215	0.508622	-1.1416	ENSMUST00000113924	2818	Lst1
chr12	67568220	67568724	0.949513	0.508622	-0.900594	ENSMUST00000113942	3322	Mdga2
chr6	73174399	73174914	0.949513	0.339081	-1.48556	ENSMUST00000114040	-2755	Dnahc6
chrX	73844097	73844884	2.84854	1.35633	-1.07052	ENSMUST00000114054	3380	4930468A15Rik
chr5	35339722	35340319	1.12215	0.339081	-1.72657	ENSMUST00000114281	-1387	Rgs12
chr5	34920182	34920830	1.12215	0.508622	-1.1416	ENSMUST00000114335	3493	Add1
chr9	50304459	50305068	1.03583	0.508622	-1.02613	ENSMUST00000114474	1831	1600029D21Rik
chrX	51096906	51097449	1.03583	0.169541	-2.61109	ENSMUST00000114810	3425	Xlr
chrX	50621317	50621929	1.03583	0.339081	-1.61109	ENSMUST00000114838	269	Fam122b
chrX	45311844	45312405	0.949513	0.169541	-2.48556	ENSMUST00000115013	-1061	Ocrl
chr16	33792970	33793498	0.949513	0.508622	-0.900594	ENSMUST00000115044	-625	Muc13
chr16	31659699	31660236	0.949513	0.508622	-0.900594	ENSMUST00000115205	-3293	Dlg1
chr9	29223276	29223813	1.03583	0.169541	-2.61109	ENSMUST00000115237	-3488	Ntm
chr5	20926318	20926893	1.12215	0.508622	-1.1416	ENSMUST00000115245	3603	Ccdc146
chrX	22859508	22860145	1.55375	0.169541	-3.19605	ENSMUST00000115317	1811	Klhl13
chr6	25635990	25637588	3.36646	1.69541	-0.989599	ENSMUST00000115332	3142	Gpr37
chr6	7501253	7501850	1.03583	0.169541	-2.61109	ENSMUST00000115546	-3221	Tac1
chr1	148571416	148572078	1.12215	0.169541	-2.72657	ENSMUST00000116191	-633	Gm15583
chr3	8514043	8514585	0.949513	0.169541	-2.48556	ENSMUST00000116348	4518	Stmn2
chr12	79789215	79789955	1.55375	0.678163	-1.19605	ENSMUST00000116417	-2567	Fam71d
chr4	128800877	128801460	1.12215	0.169541	-2.72657	ENSMUST00000116444	-1598	Hpca
chr19	4399391	4399910	0.949513	0.339081	-1.48556	ENSMUST00000116571	-1126	Kdm2a
chr1	128366424	128367018	1.20847	0.508622	-1.24852	ENSMUST00000116695	-1624	AC164156.1
chr9	115289097	115289960	2.15798	1.01724	-1.08502	ENSMUST00000116759	-977	Mir467h
chr11	71837388	71838732	3.36646	1.35633	-1.31153	ENSMUST00000116927	1133	U6atac
chr2	157347838	157349016	2.93486	0.847703	-1.79166	ENSMUST00000117142	-75	Gm14279
chr7	19763712	19764247	1.03583	0.339081	-1.61109	ENSMUST00000117338	1944	Eml2
chr2	156737915	156738447	0.949513	0.508622	-0.900594	ENSMUST00000117381	2673	Gm14278
chr13	110720010	110720635	1.12215	0.339081	-1.72657	ENSMUST00000117420	2960	Pde4d
chr10	80718583	80719131	0.949513	0.169541	-2.48556	ENSMUST00000117488	-913	Matk
chrX	70558041	70558743	1.64007	0.847703	-0.952125	ENSMUST00000117684	0	Gm8501
chrX	154039044	154039988	2.93486	1.18678	-1.30623	ENSMUST00000117734	2112	Gm15176
chr11	19255946	19256702	1.55375	0.508622	-1.61109	ENSMUST00000117768	4371	Gm12025
chr16	74408960	74410501	3.45278	1.18678	-1.5407	ENSMUST00000117785	734	Robo2
chr4	118170933	118171581	1.12215	0.339081	-1.72657	ENSMUST00000117834	-687	Gm12859
chr6	28309666	28310209	1.12215	0.169541	-2.72657	ENSMUST00000117943	2957	Gm5303
chr4	81341114	81341911	1.64007	0.847703	-0.952125	ENSMUST00000117951	-434	Gm11411
chr11	93897214	93898000	1.46743	0.678163	-1.11359	ENSMUST00000118048	943	Gm11518
chr10	104948234	104948783	0.949513	0.339081	-1.48556	ENSMUST00000118054	-4040	Gm15666
chr3	51603198	51603844	1.38111	0.508622	-1.44116	ENSMUST00000118075	-2742	Maml3
chr14	50400687	50401354	1.55375	0.508622	-1.61109	ENSMUST00000118129	1693	3632451O06Rik
chrX	72400611	72401223	1.64007	0.339081	-2.27405	ENSMUST00000118131	0	Gm8503
chr3	137562984	137563810	1.64007	0.847703	-0.952125	ENSMUST00000118147	-4163	Gm15460
chr2	103688752	103689846	2.41694	0.508622	-2.24852	ENSMUST00000118308	-4940	Gm13879
chr5	145172405	145172966	1.12215	0.339081	-1.72657	ENSMUST00000118354	4936	Gm15709
chr2	78874156	78875174	2.2443	0.678163	-1.72657	ENSMUST00000118363	3718	Gm14469
chr10	80457364	80458406	2.2443	1.18678	-0.91921	ENSMUST00000118465	2530	Gng7
chr4	32138210	32138675	1.03583	0.508622	-1.02613	ENSMUST00000118472	-38	Gm11927
chr11	30602248	30602760	0.949513	0.169541	-2.48556	ENSMUST00000118660	3142	Gm12099
chr2	83584258	83584831	1.29479	0.169541	-2.93302	ENSMUST00000118734	1063	Dnmt3l-ps1
chr7	127249917	127250473	1.12215	0.169541	-2.72657	ENSMUST00000118737	3497	Tmem159
chr8	108417451	108418136	1.12215	0.339081	-1.72657	ENSMUST00000118920	0	Nrn1l
chr2	52215037	52215489	1.03583	0.169541	-2.61109	ENSMUST00000118922	2527	Gm13521
chr2	167106024	167106812	1.64007	0.847703	-0.952125	ENSMUST00000118980	466	Gm11473
chrX	34373610	34374442	2.07167	0.169541	-3.61109	ENSMUST00000118985	4847	Gm14541
chr2	78859826	78860493	1.55375	0.508622	-1.61109	ENSMUST00000119028	2936	Gm14466
chr2	24345020	24345605	1.12215	0.508622	-1.1416	ENSMUST00000119097	-3983	Gm13418
chr9	50358159	50358728	1.12215	0.508622	-1.1416	ENSMUST00000119103	4559	Bco2
chr4	22458420	22458996	1.12215	0.169541	-2.72657	ENSMUST00000119408	-2265	Gm11881
chr1	66983628	66984174	0.949513	0.169541	-2.48556	ENSMUST00000119429	-1701	Myl1
chr10	6349419	6350328	1.81271	0.678163	-1.41844	ENSMUST00000119524	3843	Gm16074
chrX	91915844	91916518	1.38111	0.508622	-1.44116	ENSMUST00000119588	1942	Gm5402
chrX	65566248	65566886	1.38111	0.339081	-2.02613	ENSMUST00000119605	2607	Gm4910
chr2	84160927	84161660	1.29479	0.508622	-1.34805	ENSMUST00000119708	-2460	Gm13711
chr9	95716858	95717765	1.72639	0.678163	-1.34805	ENSMUST00000119760	-1034	Pls1
chrX	58073967	58074402	1.03583	0.339081	-1.61109	ENSMUST00000119809	2586	Gm14660
chr3	37455804	37456374	1.20847	0.508622	-1.24852	ENSMUST00000119860	-380	Gm12564
chr4	84345852	84346261	0.949513	0.169541	-2.48556	ENSMUST00000119869	2087	Gm12420
chr14	61766779	61767409	1.20847	0.508622	-1.24852	ENSMUST00000119943	0	Sacs
chr11	33076413	33077252	1.55375	0.169541	-3.19605	ENSMUST00000119969	3496	Gm12115
chr2	72973162	72973604	0.949513	0.508622	-0.900594	ENSMUST00000120032	3362	Gm13666
chr1	61258877	61263247	15.2785	7.62933	-1.00188	ENSMUST00000120063	-4792	Gm11591
chr11	91995901	91997046	2.6759	0.678163	-1.98032	ENSMUST00000120123	-4656	Gm11499
chr4	129660052	129660717	1.55375	0.678163	-1.19605	ENSMUST00000120204	-1397	Bai2
chr10	62839983	62840565	1.38111	0.508622	-1.44116	ENSMUST00000120239	3888	Sirt1
chr9	45822248	45822811	1.38111	0.339081	-2.02613	ENSMUST00000120247	1167	Sik3
chr3	101040136	101040740	1.12215	0.339081	-1.72657	ENSMUST00000120257	2755	Gm12487
chr4	95738630	95738890	0.949513	0.169541	-2.48556	ENSMUST00000120275	508	Hspe1-ps6
chr11	88248677	88249183	1.03583	0.508622	-1.02613	ENSMUST00000120278	-1662	Gm11510
chr13	25542898	25544028	2.93486	1.35633	-1.11359	ENSMUST00000120382	-3563	Tpi-rs8
chr2	50375474	50376592	2.93486	1.18678	-1.30623	ENSMUST00000120419	789	Gm13488
chr5	27232258	27233241	2.15798	1.01724	-1.08502	ENSMUST00000120555	1025	Dpp6
chr2	154538489	154539043	0.949513	0.339081	-1.48556	ENSMUST00000120578	416	Gm14215
chr4	109431711	109432427	1.55375	0.169541	-3.19605	ENSMUST00000120597	-4290	Gm12808
chr2	78997790	78998618	1.55375	0.169541	-3.19605	ENSMUST00000120603	3135	Gm14465
chr2	128992986	128993615	1.38111	0.339081	-2.02613	ENSMUST00000120625	-821	Gm14026
chr2	70699631	70700365	1.20847	0.508622	-1.24852	ENSMUST00000120668	4887	Gm13633
chr11	72382236	72382930	1.29479	0.508622	-1.34805	ENSMUST00000120676	3903	Gm12712
chr2	28335701	28336449	1.38111	0.339081	-2.02613	ENSMUST00000120702	3017	Rpsa-ps9
chr11	52498328	52499226	1.98535	0.339081	-2.54969	ENSMUST00000120769	-1603	Gm11187
chr4	42085183	42085553	0.949513	0.508622	-0.900594	ENSMUST00000120895	-2078	Gm13301
chr7	50857384	50857982	1.12215	0.169541	-2.72657	ENSMUST00000120935	-4557	Zfp819
chr2	48248049	48248901	1.64007	0.847703	-0.952125	ENSMUST00000120948	4494	Gm13472
chr11	5531622	5532193	1.03583	0.339081	-1.61109	ENSMUST00000120982	-1949	Gm11964
chr4	17179619	17180151	0.949513	0.508622	-0.900594	ENSMUST00000121293	3358	Gm11849
chr2	87109888	87110444	1.03583	0.169541	-2.61109	ENSMUST00000121296	887	Olfr1116-ps
chr9	40156474	40157152	1.20847	0.339081	-1.83348	ENSMUST00000121357	-2600	Gramd1b
chr2	64314118	64314689	1.55375	0.678163	-1.19605	ENSMUST00000121365	-1105	Gm13577
chr11	54017050	54017675	1.12215	0.508622	-1.1416	ENSMUST00000121368	4117	Gm12222
chr2	111694382	111694790	0.949513	0.169541	-2.48556	ENSMUST00000121395	-2388	Gm13931
chr19	10081088	10081495	0.949513	0.339081	-1.48556	ENSMUST00000121418	4931	Rab3il1
chr5	138333812	138334440	1.38111	0.169541	-3.02613	ENSMUST00000121449	3748	Gm15502
chr2	72406642	72407079	0.949513	0.169541	-2.48556	ENSMUST00000121450	1801	Gm13637
chr4	88352435	88353087	1.20847	0.169541	-2.83348	ENSMUST00000121577	1271	Gm13282
chr11	3528590	3529733	2.84854	1.01724	-1.48556	ENSMUST00000121615	0	Gm11950
chr13	26884580	26885225	1.29479	0.508622	-1.34805	ENSMUST00000121974	-4926	Gm11354
chr8	25691126	25691673	1.03583	0.169541	-2.61109	ENSMUST00000121992	-4322	Ido2
chr16	56908765	56909390	1.03583	0.169541	-2.61109	ENSMUST00000122099	777	Gm15840
chr4	148174896	148175445	1.12215	0.339081	-1.72657	ENSMUST00000122222	-3093	Casz1
chr5	150300165	150300755	1.12215	0.508622	-1.1416	ENSMUST00000122249	4868	Gm2566
chr17	5115465	5115955	0.949513	0.508622	-0.900594	ENSMUST00000122283	-3347	Gm15599
chr2	31519684	31520315	1.03583	0.508622	-1.02613	ENSMUST00000122301	3696	Gm13424
chr13	114017840	114018413	1.12215	0.169541	-2.72657	ENSMUST00000122399	-1725	Gzmk
chr5	117798147	117798504	1.03583	0.339081	-1.61109	ENSMUST00000122416	850	Gm15727
chr16	43941927	43942500	1.38111	0.678163	-1.02613	ENSMUST00000122440	2692	2610015P09Rik
chr1	69176700	69177370	1.29479	0.678163	-0.933016	ENSMUST00000122454	504	Gm8840
chr1	88530833	88531618	2.41694	1.18678	-1.02613	ENSMUST00000122519	2566	AC158132.1
chr1	151576943	151577444	0.949513	0.169541	-2.48556	ENSMUST00000122583	4545	n-R5s218
chr4	94729848	94730411	1.12215	0.339081	-1.72657	ENSMUST00000122675	509	n-R5s189
chr5	15352170	15352709	1.03583	0.169541	-2.61109	ENSMUST00000122706	1573	U3
chr7	104168006	104168734	1.72639	0.678163	-1.34805	ENSMUST00000122835	-3445	Nars2
chr6	128946869	128947522	1.38111	0.678163	-1.02613	ENSMUST00000122939	3813	BC064078
chr10	12806979	12807624	1.12215	0.339081	-1.72657	ENSMUST00000123135	-2873	Plagl1
chr11	20735596	20736182	1.03583	0.169541	-2.61109	ENSMUST00000123160	-3675	Gm12037
chr7	119645016	119645566	1.20847	0.339081	-1.83348	ENSMUST00000123185	327	Parva
chr6	116336224	116337241	1.81271	0.847703	-1.09651	ENSMUST00000123246	0	2008-03-01
chr11	101818424	101819045	1.29479	0.339081	-1.93302	ENSMUST00000123249	4691	4930417O22Rik
chr4	71777450	71778013	0.949513	0.508622	-0.900594	ENSMUST00000123259	3756	Tle1
chr2	38594479	38595470	2.15798	1.01724	-1.08502	ENSMUST00000123342	515	Nr6a1
chr10	72560468	72561283	1.38111	0.678163	-1.02613	ENSMUST00000123398	-807	Pcdh15
chr2	51826109	51826650	0.949513	0.169541	-2.48556	ENSMUST00000123521	1841	Nmi
chr4	43491996	43492561	1.38111	0.678163	-1.02613	ENSMUST00000123526	3534	Sit1
chr2	125038140	125038758	1.12215	0.508622	-1.1416	ENSMUST00000123574	4491	Gm14002
chr7	107782375	107782913	0.949513	0.339081	-1.48556	ENSMUST00000123960	0	Rab6
chr4	118911542	118912481	2.2443	1.18678	-0.91921	ENSMUST00000123963	997	Lepre1
chr13	54881792	54882380	1.12215	0.508622	-1.1416	ENSMUST00000124055	2073	Gm16249
chr12	11462816	11463481	1.29479	0.339081	-1.93302	ENSMUST00000124065	0	Rad51ap2
chr7	91675397	91675943	1.12215	0.508622	-1.1416	ENSMUST00000124191	-1542	Gm2115
chrX	139121983	139122473	1.03583	0.508622	-1.02613	ENSMUST00000124211	4554	Tmem164
chr4	107705659	107706218	0.949513	0.339081	-1.48556	ENSMUST00000124265	-718	Podn
chr12	108193575	108194213	1.38111	0.508622	-1.44116	ENSMUST00000124395	0	Gm16087
chr2	13467627	13468232	1.29479	0.678163	-0.933016	ENSMUST00000124488	-1337	Trdmt1
chrX	166426717	166428356	3.28014	1.69541	-0.952125	ENSMUST00000124513	-1847	Gm15247
chr6	29930171	29930618	1.03583	0.169541	-2.61109	ENSMUST00000124522	-4711	1700023L04Rik
chr6	113266447	113266999	1.03583	0.508622	-1.02613	ENSMUST00000124530	-153	Brpf1
chr13	29945447	29945923	0.949513	0.339081	-1.48556	ENSMUST00000124532	1378	Cdkal1
chr11	102272405	102272980	1.29479	0.678163	-0.933016	ENSMUST00000124755	-3146	Slc25a39
chr4	139180994	139181614	1.12215	0.339081	-1.72657	ENSMUST00000124987	1972	Aldh4a1
chr4	98040360	98040826	1.12215	0.508622	-1.1416	ENSMUST00000125034	894	Tm2d1
chr5	123972454	123972994	0.949513	0.339081	-1.48556	ENSMUST00000125047	507	Diablo
chr11	53974763	53975371	1.38111	0.169541	-3.02613	ENSMUST00000125096	2337	Gm12221
chr7	90806661	90807564	1.98535	0.508622	-1.96472	ENSMUST00000125131	-521	2310044K18Rik
chr5	125052491	125052957	0.949513	0.169541	-2.48556	ENSMUST00000125191	3692	Tctn2
chrX	40781800	40782553	1.64007	0.678163	-1.27405	ENSMUST00000125231	0	Odz1
chr1	148346999	148347830	1.72639	0.847703	-1.02613	ENSMUST00000125331	2133	Fam5c
chr2	155134737	155135430	1.89903	1.01724	-0.900594	ENSMUST00000125334	-4310	Pigu
chr5	65808799	65809301	0.949513	0.169541	-2.48556	ENSMUST00000125375	4599	Ugdh
chr13	81588391	81588997	1.20847	0.339081	-1.83348	ENSMUST00000125698	-4889	Gpr98
chrX	140367103	140367923	1.64007	0.847703	-0.952125	ENSMUST00000125768	0	Dcx
chr2	24492790	24494153	3.28014	1.35633	-1.27405	ENSMUST00000125798	0	Cacna1b
chr10	19590408	19591196	1.38111	0.508622	-1.44116	ENSMUST00000125942	-929	Pex7
chr13	98511787	98512392	1.03583	0.508622	-1.02613	ENSMUST00000125960	685	5330416C01Rik
chr9	96622330	96622826	0.949513	0.169541	-2.48556	ENSMUST00000126066	-2062	Zbtb38
chr4	94859782	94860348	1.29479	0.678163	-0.933016	ENSMUST00000126143	0	Gm12708
chr4	67683695	67684542	2.76222	1.18678	-1.21877	ENSMUST00000126187	0	Gm11751
chr11	70026161	70026898	1.64007	0.169541	-3.27405	ENSMUST00000126388	0	Slc16a11
chr2	160696273	160697012	1.29479	0.339081	-1.93302	ENSMUST00000126450	1177	Zhx3
chr12	100579264	100579811	1.20847	0.339081	-1.83348	ENSMUST00000126476	0	3300002A11Rik
chr16	33689461	33690183	1.55375	0.508622	-1.61109	ENSMUST00000126532	4832	Heg1
chr4	85738484	85739005	0.949513	0.339081	-1.48556	ENSMUST00000126654	4783	Adamtsl1
chr2	68202273	68202919	1.29479	0.339081	-1.93302	ENSMUST00000126663	1658	Stk39
chr2	84344224	84345503	7.85506	1.69541	-2.21199	ENSMUST00000126679	1528	Gm13710
chr1	132771408	132771905	0.949513	0.169541	-2.48556	ENSMUST00000126821	-2830	Faim3
chr19	24490578	24491863	2.93486	0.339081	-3.11359	ENSMUST00000126936	81	4930418C01Rik
chr19	57078217	57079048	1.72639	0.847703	-1.02613	ENSMUST00000126964	-2682	Afap1l2
chr6	34265690	34266339	1.12215	0.339081	-1.72657	ENSMUST00000126991	1092	Akr1b3
chr6	39104670	39105347	1.20847	0.169541	-2.83348	ENSMUST00000127036	0	Jhdm1d
chr4	109324313	109324942	1.03583	0.508622	-1.02613	ENSMUST00000127391	1795	9630013D21Rik
chr11	29100268	29100780	1.03583	0.339081	-1.61109	ENSMUST00000127621	3072	Smek2
chr2	30123894	30124603	1.38111	0.678163	-1.02613	ENSMUST00000127689	1513	Phyhd1
chr4	54658910	54660194	6.56027	2.54311	-1.36716	ENSMUST00000127709	0	Gm12478
chrX	100678978	100680650	5.09284	2.71265	-0.908768	ENSMUST00000127786	-423	Xist
chr7	51688163	51688718	1.03583	0.508622	-1.02613	ENSMUST00000127790	3777	Lrrc4b
chr10	67001497	67002121	1.46743	0.678163	-1.11359	ENSMUST00000127820	68	Egr2
chr2	90885320	90886130	2.93486	1.18678	-1.30623	ENSMUST00000128008	2380	Rapsn
chr8	41598942	41599418	1.03583	0.339081	-1.61109	ENSMUST00000128237	1772	Cnot7
chr18	56933324	56935065	5.95604	2.37357	-1.32729	ENSMUST00000128240	3955	Gm15345
chr1	61359151	61360420	4.14333	1.69541	-1.28916	ENSMUST00000128274	-3060	Gm11587
chr1	87487334	87488174	1.89903	0.339081	-2.48556	ENSMUST00000128339	-1569	Sp110
chr15	78600603	78602702	7.16451	2.88219	-1.3137	ENSMUST00000128389	0	Mfng
chr8	109554458	109555018	0.949513	0.169541	-2.48556	ENSMUST00000128476	71	Gm16208
chr10	21567142	21567860	1.29479	0.508622	-1.34805	ENSMUST00000128552	-2486	Gm6846
chr4	56237045	56238123	2.50326	1.18678	-1.07675	ENSMUST00000128591	0	2310081O03Rik
chr15	78895715	78896432	1.55375	0.339081	-2.19605	ENSMUST00000128631	-2393	Ankrd54
chr14	70103485	70104060	1.12215	0.508622	-1.1416	ENSMUST00000128747	1061	R3hcc1
chrX	45975085	45975564	1.12215	0.508622	-1.1416	ENSMUST00000128773	-1026	Slc25a14
chr15	37364856	37365417	0.949513	0.339081	-1.48556	ENSMUST00000128804	-1688	Gm15941
chr6	29854471	29854978	0.949513	0.339081	-1.48556	ENSMUST00000128837	967	Ahcyl2
chrX	7214910	7216230	5.17916	1.86495	-1.47358	ENSMUST00000128890	0	Syp
chr16	44430317	44430728	0.949513	0.169541	-2.48556	ENSMUST00000128916	-1428	Wdr52
chr5	108978104	108979791	5.26548	2.54311	-1.04997	ENSMUST00000129040	0	Cplx1
chr2	118536649	118537226	1.29479	0.678163	-0.933016	ENSMUST00000129153	0	Plcb2
chr11	62463950	62464468	0.949513	0.508622	-0.900594	ENSMUST00000129162	1001	Mmgt2
chr2	93710795	93712308	5.69708	3.05173	-0.900594	ENSMUST00000129248	-1482	Accsl
chr9	114822335	114822945	1.03583	0.169541	-2.61109	ENSMUST00000129305	-4142	Gpd1l
chr15	34417233	34417840	1.12215	0.169541	-2.72657	ENSMUST00000129426	1602	Hrsp12
chr2	66277970	66278745	2.33062	0.847703	-1.45908	ENSMUST00000129508	127	Scn1a
chr3	105960298	105960856	0.949513	0.339081	-1.48556	ENSMUST00000129563	2689	Chi3l3
chr2	123957619	123958256	1.20847	0.169541	-2.83348	ENSMUST00000129584	-1928	4930517E11Rik
chr2	30465682	30466329	1.29479	0.169541	-2.93302	ENSMUST00000129719	4947	Cstad
chr5	112798104	112798640	1.29479	0.508622	-1.34805	ENSMUST00000129839	341	Hps4
chr12	66138220	66138822	1.12215	0.508622	-1.1416	ENSMUST00000129956	869	Prpf39
chr1	122979026	122979812	1.46743	0.678163	-1.11359	ENSMUST00000130015	-4170	B230209K01Rik
chr11	62819063	62819624	1.20847	0.169541	-2.83348	ENSMUST00000130177	-1428	4930452L02Rik
chr8	47572692	47573748	1.98535	0.678163	-1.54969	ENSMUST00000130563	-2580	Acsl1
chr4	8766749	8767655	1.89903	1.01724	-0.900594	ENSMUST00000130709	0	Chd7
chr2	45212106	45212912	1.55375	0.678163	-1.19605	ENSMUST00000130773	0	Gm13479
chr9	39410152	39411285	2.6759	1.35633	-0.980322	ENSMUST00000130829	0	AW551984
chr11	71471732	71472590	1.55375	0.508622	-1.61109	ENSMUST00000130837	0	Gm12324
chr2	154844222	154846183	9.32249	0.169541	-5.78101	ENSMUST00000130870	222	Gm14226
chr6	148163362	148164175	2.41694	1.01724	-1.24852	ENSMUST00000130872	-268	Gm17216
chr5	115019500	115020038	0.949513	0.169541	-2.48556	ENSMUST00000130983	1476	BC057022
chr5	150882516	150884174	3.36646	1.52587	-1.1416	ENSMUST00000131212	0	Rxfp2
chr2	113837903	113838441	0.949513	0.508622	-0.900594	ENSMUST00000131299	-858	RP23-230H3.2
chr16	96265394	96266126	1.29479	0.339081	-1.93302	ENSMUST00000131322	2642	Brwd1
chr6	83234906	83235409	0.949513	0.339081	-1.48556	ENSMUST00000131432	-2220	Slc4a5
chr5	144394932	144395492	0.949513	0.508622	-0.900594	ENSMUST00000131436	0	Cyth3
chr11	79683789	79684287	1.12215	0.339081	-1.72657	ENSMUST00000131441	1610	9130204K15Rik
chr7	130369034	130369626	1.12215	0.169541	-2.72657	ENSMUST00000131461	-2772	Slc5a11
chr6	52146824	52147280	0.949513	0.508622	-0.900594	ENSMUST00000131502	-3843	2700086A05Rik
chr2	62295759	62296371	1.38111	0.339081	-2.02613	ENSMUST00000131533	-1055	Gm13564
chr4	137241302	137242157	1.98535	1.01724	-0.964725	ENSMUST00000131536	-1176	Rap1gap
chr17	47812921	47814018	3.1075	1.52587	-1.02613	ENSMUST00000131550	2673	Usp49
chr1	129912858	129913489	1.29479	0.678163	-0.933016	ENSMUST00000131732	1782	Zranb3
chr19	32346332	32346889	1.12215	0.339081	-1.72657	ENSMUST00000131768	4528	Sgms1
chr2	24296911	24298354	3.45278	1.18678	-1.5407	ENSMUST00000131886	0	Gm13415
chr2	157390391	157390945	0.949513	0.339081	-1.48556	ENSMUST00000131902	1123	Blcap
chr5	3926555	3927089	1.12215	0.339081	-1.72657	ENSMUST00000132058	-965	Akap9
chr1	182868768	182869200	0.949513	0.339081	-1.48556	ENSMUST00000132087	1768	Lefty1
chr2	91119221	91119787	1.03583	0.169541	-2.61109	ENSMUST00000132092	3512	1110051M20Rik
chr7	116984391	116985029	1.29479	0.339081	-1.93302	ENSMUST00000132113	0	Scube2
chr2	25112274	25112779	0.949513	0.339081	-1.48556	ENSMUST00000132128	-733	Ndor1
chr7	52335365	52335771	1.20847	0.339081	-1.83348	ENSMUST00000132359	3589	Nosip
chr1	174480477	174481320	1.64007	0.678163	-1.27405	ENSMUST00000132370	0	4933439K11Rik
chr1	134282569	134283141	1.12215	0.339081	-1.72657	ENSMUST00000132435	3755	Tmcc2
chr2	110990034	110990465	0.949513	0.169541	-2.48556	ENSMUST00000132464	2629	Gm15130
chr4	95730281	95730823	0.949513	0.339081	-1.48556	ENSMUST00000132513	-1562	Cyp2j13
chr13	4251213	4251862	1.12215	0.339081	-1.72657	ENSMUST00000132531	3234	Marcksl1-ps4
chr1	37417254	37417683	1.12215	0.169541	-2.72657	ENSMUST00000132615	2492	Inpp4a
chr4	11084352	11085156	1.89903	0.847703	-1.16363	ENSMUST00000132693	763	Trp53inp1
chr5	51947038	51947998	1.98535	1.01724	-0.964725	ENSMUST00000132734	-1879	Ppargc1a
chr6	28081831	28082462	1.29479	0.508622	-1.34805	ENSMUST00000132755	668	Grm8
chr9	65938237	65938852	1.20847	0.508622	-1.24852	ENSMUST00000132841	303	Snx1
chr7	139847839	139848718	3.36646	1.69541	-0.989599	ENSMUST00000132849	2850	Gm15582
chr4	85026084	85026642	0.949513	0.169541	-2.48556	ENSMUST00000133109	3841	Sh3gl2
chr1	6349000	6349733	1.55375	0.339081	-2.19605	ENSMUST00000133144	0	Fam150a
chr11	85391453	85392037	1.46743	0.169541	-3.11359	ENSMUST00000133194	-2507	Bcas3
chrX	50096956	50097435	0.949513	0.169541	-2.48556	ENSMUST00000133214	336	Kis2
chr1	182194701	182195921	2.50326	0.847703	-1.56218	ENSMUST00000133340	-1133	Psen2
chr6	30627293	30627816	1.12215	0.339081	-1.72657	ENSMUST00000133373	2718	Tsga14
chr11	80325282	80326470	2.6759	1.35633	-0.980322	ENSMUST00000133400	-2675	C030013C21Rik
chr4	82557644	82558562	1.98535	0.169541	-3.54969	ENSMUST00000133610	1777	Frem1
chr2	115404717	115406211	3.28014	1.01724	-1.68909	ENSMUST00000133648	1081	Gm13977
chr11	57928437	57929165	1.29479	0.339081	-1.93302	ENSMUST00000133923	910	Cnot8
chr10	14403542	14404055	1.03583	0.169541	-2.61109	ENSMUST00000133927	0	Vta1
chr11	18776601	18777552	3.71173	1.52587	-1.28247	ENSMUST00000133948	-2290	8430419K02Rik
chr7	82791109	82791637	0.949513	0.339081	-1.48556	ENSMUST00000134001	2040	Akap13
chr6	90381550	90382270	1.38111	0.508622	-1.44116	ENSMUST00000134224	-2760	Ccdc37
chr7	29093719	29094855	3.1075	1.18678	-1.3887	ENSMUST00000134263	-683	Timm50
chr13	94913021	94913563	1.03583	0.169541	-2.61109	ENSMUST00000134284	-2950	Gm15907
chr5	34997440	34998078	1.12215	0.169541	-2.72657	ENSMUST00000134467	4075	Gm15522
chr6	31318606	31319206	1.20847	0.169541	-2.83348	ENSMUST00000134541	-3689	Gm13844
chr6	33812786	33813759	2.50326	0.847703	-1.56218	ENSMUST00000134653	688	Exoc4
chr2	137486713	137487431	1.29479	0.169541	-2.93302	ENSMUST00000134833	-1740	Gm14064
chr2	126314011	126314505	1.03583	0.339081	-1.61109	ENSMUST00000134977	2785	Atp8b4
chr11	120077667	120079146	3.36646	1.52587	-1.1416	ENSMUST00000135048	0	Gm11770
chr2	104928918	104930127	3.1075	1.52587	-1.02613	ENSMUST00000135153	0	AI314831
chr1	175386219	175386914	1.64007	0.847703	-0.952125	ENSMUST00000135370	602	Aim2
chr8	47634944	47635579	1.29479	0.169541	-2.93302	ENSMUST00000135432	-1830	Mlf1ip
chr7	121417581	121418162	1.12215	0.169541	-2.72657	ENSMUST00000135570	1379	Psma1
chr3	33747405	33748112	1.55375	0.508622	-1.61109	ENSMUST00000135728	-4174	Ccdc39
chr2	58026320	58027634	2.6759	1.18678	-1.17297	ENSMUST00000135735	4174	Gm13546
chr1	92860101	92860740	1.20847	0.339081	-1.83348	ENSMUST00000135819	3455	Rab17
chr7	152121398	152122067	1.46743	0.678163	-1.11359	ENSMUST00000135985	2036	Ccnd1
chr2	26224048	26224576	1.20847	0.508622	-1.24852	ENSMUST00000136054	-759	Snapc4
chr7	56135714	56136647	1.89903	0.847703	-1.16363	ENSMUST00000136142	0	E2f8
chr8	107783393	107784342	1.98535	1.01724	-0.964725	ENSMUST00000136239	0	Tradd
chr2	152675926	152677359	3.28014	1.69541	-0.952125	ENSMUST00000136407	2110	Tpx2
chr9	74921155	74921874	1.55375	0.678163	-1.19605	ENSMUST00000136731	1750	Myo5a
chr12	41073958	41074594	1.29479	0.169541	-2.93302	ENSMUST00000136772	-3971	Zfp277
chr16	32160370	32160987	1.03583	0.169541	-2.61109	ENSMUST00000136809	4557	Lrrc33
chr9	99482311	99482866	0.949513	0.169541	-2.48556	ENSMUST00000136884	1597	Dbr1
chr15	80809863	80810397	1.03583	0.339081	-1.61109	ENSMUST00000137004	1598	Sgsm3
chr6	129191325	129191977	1.55375	0.508622	-1.61109	ENSMUST00000137057	-3326	2310001H17Rik
chr5	137732077	137732426	1.03583	0.508622	-1.02613	ENSMUST00000137126	1604	Ache
chr9	75677435	75678039	1.29479	0.508622	-1.34805	ENSMUST00000137213	1608	Bmp5
chr14	64229338	64229951	1.12215	0.169541	-2.72657	ENSMUST00000137259	-3130	Gm15918
chr19	57122444	57123239	2.15798	0.508622	-2.08502	ENSMUST00000137389	-717	Ablim1
chr7	28230784	28231766	2.15798	0.847703	-1.34805	ENSMUST00000137414	0	Spnb4
chr17	13987783	13988289	0.949513	0.169541	-2.48556	ENSMUST00000137503	0	Mllt4
chr10	79799983	79800534	1.12215	0.508622	-1.1416	ENSMUST00000137571	2297	Adamtsl5
chr7	116622792	116623336	1.20847	0.169541	-2.83348	ENSMUST00000137704	-4145	Trim66
chrX	131154380	131155782	3.79805	1.86495	-1.02613	ENSMUST00000137737	4502	Gm7855
chr4	124526171	124526859	1.81271	0.508622	-1.83348	ENSMUST00000137769	859	1110065P20Rik
chr13	56182715	56183264	0.949513	0.339081	-1.48556	ENSMUST00000137835	2619	H2afy
chr9	105976313	105976752	0.949513	0.339081	-1.48556	ENSMUST00000137847	-1574	Col6a4
chr6	29662014	29662685	1.46743	0.678163	-1.11359	ENSMUST00000137925	3988	Tspan33
chr18	12428236	12428963	1.29479	0.339081	-1.93302	ENSMUST00000137948	1244	Ankrd29
chr5	108515509	108516133	1.03583	0.339081	-1.61109	ENSMUST00000137996	0	Mtf2
chr12	73180507	73181124	1.20847	0.169541	-2.83348	ENSMUST00000138029	4882	2810055F11Rik
chr4	14446691	14447424	1.38111	0.508622	-1.44116	ENSMUST00000138042	-3176	Slc26a7
chr9	44628874	44629429	1.03583	0.169541	-2.61109	ENSMUST00000138119	-677	Mll1
chr5	34016227	34016817	1.20847	0.508622	-1.24852	ENSMUST00000138240	4011	Tacc3
chr2	4678313	4678627	0.949513	0.169541	-2.48556	ENSMUST00000138322	4552	Bend7
chr7	64847637	64848174	1.03583	0.169541	-2.61109	ENSMUST00000138350	739	Gabrb3
chr4	63643029	63643598	1.46743	0.339081	-2.11359	ENSMUST00000138411	2037	8030451A03Rik
chr16	17021437	17022065	1.29479	0.169541	-2.93302	ENSMUST00000138413	2933	Mapk1
chr16	85799543	85799975	1.03583	0.169541	-2.61109	ENSMUST00000138474	0	Adamts1
chr11	53920682	53921281	1.46743	0.508622	-1.52863	ENSMUST00000138477	0	P4ha2
chr6	4459368	4459999	1.46743	0.169541	-3.11359	ENSMUST00000138511	3668	Col1a2
chr1	61681934	61682563	1.29479	0.508622	-1.34805	ENSMUST00000138768	-2835	Pard3b
chr1	194976871	194977695	1.72639	0.678163	-1.34805	ENSMUST00000138826	-1611	Irf6
chr16	92103933	92104671	1.29479	0.678163	-0.933016	ENSMUST00000138961	-1835	Mrps6
chr8	85852735	85853425	1.38111	0.339081	-2.02613	ENSMUST00000139041	1929	Elmod2
chr13	18478519	18479105	1.12215	0.339081	-1.72657	ENSMUST00000139064	-4648	Pou6f2
chr4	42978077	42978636	1.20847	0.508622	-1.24852	ENSMUST00000139127	-4182	1700022I11Rik
chr3	108681768	108682387	1.29479	0.678163	-0.933016	ENSMUST00000139137	2311	Fndc7
chr2	33071131	33072371	3.88437	1.86495	-1.05855	ENSMUST00000139148	0	Angptl2
chr2	151337539	151338134	1.12215	0.508622	-1.1416	ENSMUST00000139229	2705	Nsfl1c
chr2	27105771	27106379	1.20847	0.508622	-1.24852	ENSMUST00000139312	-1915	Sardh
chr13	112646874	112647562	1.29479	0.678163	-0.933016	ENSMUST00000139397	0	Gm15324
chr5	82228009	82228662	1.12215	0.169541	-2.72657	ENSMUST00000139469	-559	Gm16054
chr13	30150541	30151146	1.20847	0.508622	-1.24852	ENSMUST00000139576	0	Gm11368
chr5	123057774	123058368	1.12215	0.169541	-2.72657	ENSMUST00000139590	-4273	Ift81
chr4	3578414	3579306	1.98535	0.169541	-3.54969	ENSMUST00000139600	-4349	2210414B05Rik
chr14	66426696	66427435	1.20847	0.508622	-1.24852	ENSMUST00000139644	1629	Pbk
chr7	53811401	53812322	2.58958	0.847703	-1.61109	ENSMUST00000139791	-4349	Gm15700
chr4	137318626	137319167	1.12215	0.339081	-1.72657	ENSMUST00000139951	3224	Alpl
chr2	168026973	168027575	1.03583	0.169541	-2.61109	ENSMUST00000139984	4635	Adnp
chr19	32834731	32835214	0.949513	0.508622	-0.900594	ENSMUST00000140014	2648	Pten
chr17	56722255	56722924	1.38111	0.339081	-2.02613	ENSMUST00000140037	0	Safb2
chr17	17587211	17587891	1.20847	0.508622	-1.24852	ENSMUST00000140134	1429	Lix1
chr7	148594645	148595624	2.50326	1.01724	-1.29914	ENSMUST00000140337	0	Pddc1
chr16	76326550	76327133	1.03583	0.169541	-2.61109	ENSMUST00000140483	-2648	Nrip1
chr4	26271843	26272333	0.949513	0.169541	-2.48556	ENSMUST00000140492	1669	Manea
chr16	33114170	33114793	1.29479	0.169541	-2.93302	ENSMUST00000140504	-1971	Lmln
chr1	63218217	63218843	1.20847	0.508622	-1.24852	ENSMUST00000140612	4399	Ndufs1
chr11	76734190	76734851	1.20847	0.339081	-1.83348	ENSMUST00000140781	-3460	Blmh
chr12	30780735	30781248	1.03583	0.339081	-1.61109	ENSMUST00000140875	-872	Tpo
chr9	106152087	106152696	1.12215	0.169541	-2.72657	ENSMUST00000141118	-1631	Alas1
chr3	51201211	51202042	1.38111	0.339081	-2.02613	ENSMUST00000141156	-552	4930583H14Rik
chr5	28535909	28539073	11.9121	2.37357	-2.32729	ENSMUST00000141196	0	Cnpy1
chr2	178061818	178062235	0.949513	0.508622	-0.900594	ENSMUST00000141272	-26	Phactr3
chr11	102713204	102713806	1.12215	0.169541	-2.72657	ENSMUST00000141273	-3912	Eftud2
chr11	78076913	78077439	0.949513	0.169541	-2.48556	ENSMUST00000141331	941	2610507B11Rik
chr3	53269044	53269652	1.29479	0.169541	-2.93302	ENSMUST00000141418	1192	2810046L04Rik
chr17	25789807	25790543	1.12215	0.339081	-1.72657	ENSMUST00000141606	-1817	Lmf1
chr2	7705580	7706261	1.29479	0.339081	-1.93302	ENSMUST00000141649	-2546	Gm13211
chr7	30307144	30307618	1.03583	0.508622	-1.02613	ENSMUST00000141713	2922	4932431P20Rik
chr17	32528003	32528508	0.949513	0.339081	-1.48556	ENSMUST00000141714	0	Rasal3
chr3	36963122	36963767	1.03583	0.508622	-1.02613	ENSMUST00000141736	524	Adad1
chr9	40495671	40496135	0.949513	0.169541	-2.48556	ENSMUST00000141759	1555	9030425E11Rik
chrX	160529761	160530611	1.64007	0.339081	-2.27405	ENSMUST00000141818	0	Tmem27
chr4	20267496	20268059	1.12215	0.508622	-1.1416	ENSMUST00000141819	-2794	Gm11872
chr9	58302394	58303418	2.07167	0.678163	-1.61109	ENSMUST00000141912	0	4930461G14Rik
chr10	79836490	79837297	1.29479	0.678163	-0.933016	ENSMUST00000142053	1792	Gm15124
chr4	131406260	131407189	1.89903	1.01724	-0.900594	ENSMUST00000142386	-2412	Mecr
chr17	5970324	5970773	0.949513	0.339081	-1.48556	ENSMUST00000142409	-4813	Synj2
chr11	97316561	97317029	0.949513	0.339081	-1.48556	ENSMUST00000142465	3119	Arhgap23
chr11	116337127	116338251	3.45278	1.69541	-1.02613	ENSMUST00000142480	803	Prpsap1
chr11	62443298	62443913	1.20847	0.508622	-1.24852	ENSMUST00000142492	-4293	4930557C09Rik
chr5	24235757	24236556	1.81271	0.678163	-1.41844	ENSMUST00000142607	0	Wdr86
chr11	100976014	100977223	2.2443	1.01724	-1.1416	ENSMUST00000142733	3857	Fam134c
chr3	141129905	141130457	1.03583	0.508622	-1.02613	ENSMUST00000142762	1272	Unc5c
chr3	108184784	108185791	2.41694	1.01724	-1.24852	ENSMUST00000142833	869	Gm12522
chr18	34911248	34912072	2.2443	1.01724	-1.1416	ENSMUST00000142855	0	2010110K18Rik
chr2	158671130	158671748	1.29479	0.678163	-0.933016	ENSMUST00000143195	-4617	Dhx35
chr7	63215397	63215826	0.949513	0.339081	-1.48556	ENSMUST00000143325	1718	Nipa2
chr4	102997358	102998251	1.81271	0.847703	-1.09651	ENSMUST00000143399	271	Oma1
chr4	115841462	115842213	1.46743	0.678163	-1.11359	ENSMUST00000143426	-1257	Tspan1
chr11	88709489	88710267	2.07167	0.678163	-1.61109	ENSMUST00000143720	2551	Akap1
chr19	30167779	30168361	1.03583	0.169541	-2.61109	ENSMUST00000143769	1330	Uhrf2
chr2	38193293	38193992	1.46743	0.339081	-2.11359	ENSMUST00000143783	-809	Lhx2
chr16	4875682	4876561	1.89903	1.01724	-0.900594	ENSMUST00000143873	3245	Fam100a
chr4	128644072	128644686	1.12215	0.508622	-1.1416	ENSMUST00000143912	-4387	Adc
chr6	113640781	113641337	1.03583	0.508622	-1.02613	ENSMUST00000143948	-1416	Irak2
chr2	77154795	77155689	2.07167	1.01724	-1.02613	ENSMUST00000144043	1989	Gm13943
chr4	24607058	24607730	1.12215	0.169541	-2.72657	ENSMUST00000144062	-4485	Klhl32
chr11	88018488	88018974	1.03583	0.339081	-1.61109	ENSMUST00000144070	544	Mrps23
chr13	55618269	55618921	1.03583	0.169541	-2.61109	ENSMUST00000144288	-3233	Pdlim7
chr2	77891076	77891875	1.46743	0.339081	-2.11359	ENSMUST00000144728	1798	4930440I19Rik
chr10	114901581	114902036	0.949513	0.169541	-2.48556	ENSMUST00000144732	-1447	Lgr5
chrX	166420872	166421501	1.12215	0.339081	-1.72657	ENSMUST00000144738	1664	Gm15726
chr12	40761017	40761938	1.81271	0.678163	-1.41844	ENSMUST00000144910	2017	Arl4a
chr9	55086717	55087280	0.949513	0.169541	-2.48556	ENSMUST00000144939	2989	Nrg4
chr11	60025448	60026238	1.72639	0.508622	-1.76309	ENSMUST00000144942	-1482	Srebf1
chr11	25200907	25201602	1.29479	0.339081	-1.93302	ENSMUST00000145127	0	Gm12069
chrX	155880061	155880823	1.55375	0.508622	-1.61109	ENSMUST00000145142	-3117	Mtap7d2
chr2	128579788	128580345	1.46743	0.339081	-2.11359	ENSMUST00000145178	-348	Gm14011
chr2	34660256	34660799	0.949513	0.508622	-0.900594	ENSMUST00000145180	3385	Fbxw2
chr1	13292446	13292998	0.949513	0.339081	-1.48556	ENSMUST00000145280	-2644	Ncoa2
chrX	147258426	147259122	1.89903	0.847703	-1.16363	ENSMUST00000145639	-2393	Itih5l-ps
chr11	95905004	95905498	0.949513	0.169541	-2.48556	ENSMUST00000145749	-506	Snf8
chr11	72836794	72837406	1.29479	0.678163	-0.933016	ENSMUST00000145834	-2681	Camkk1
chr10	85953850	85955791	7.68243	3.89944	-0.978297	ENSMUST00000145864	0	Syn3
chr9	102615235	102615914	1.20847	0.169541	-2.83348	ENSMUST00000145913	-3088	Amotl2
chr18	69758323	69758938	1.12215	0.339081	-1.72657	ENSMUST00000145918	-252	Tcf4
chr6	120861171	120862363	2.41694	1.01724	-1.24852	ENSMUST00000145948	4454	Bid
chr2	60817358	60817986	1.20847	0.508622	-1.24852	ENSMUST00000146034	-4151	Gm13582
chr16	11085963	11086771	1.38111	0.508622	-1.44116	ENSMUST00000146081	675	Txndc11
chr17	66334688	66335837	3.19382	1.69541	-0.913651	ENSMUST00000146090	-2395	Ankrd12
chr5	8984156	8984709	0.949513	0.169541	-2.48556	ENSMUST00000146115	-2013	Crot
chr2	14254441	14255038	1.29479	0.339081	-1.93302	ENSMUST00000146168	4255	Mrc1
chr10	76805883	76806643	1.46743	0.678163	-1.11359	ENSMUST00000146319	-2963	Adarb1
chr18	61374467	61374974	0.949513	0.169541	-2.48556	ENSMUST00000146409	-3202	Slc26a2
chr2	31953146	31953758	1.12215	0.339081	-1.72657	ENSMUST00000146502	1473	Ppapdc3
chr11	111969726	111970259	1.29479	0.169541	-2.93302	ENSMUST00000146550	976	Gm11680
chr5	83783905	83784443	1.03583	0.508622	-1.02613	ENSMUST00000146669	0	Tecrl
chr3	145799600	145800343	1.20847	0.339081	-1.83348	ENSMUST00000146689	-1701	Mcoln3
chr9	57960685	57962152	4.66125	1.69541	-1.45908	ENSMUST00000146741	16	Ccdc33
chr6	92013708	92014320	1.46743	0.508622	-1.52863	ENSMUST00000146743	-3103	Fgd5
chr6	47400028	47400595	1.03583	0.169541	-2.61109	ENSMUST00000146828	-2802	Cul1
chr6	125600413	125600998	1.12215	0.169541	-2.72657	ENSMUST00000147101	1128	Vwf
chr4	122679706	122680140	1.20847	0.508622	-1.24852	ENSMUST00000147259	3126	Mycl1
chr13	24153165	24153613	0.949513	0.169541	-2.48556	ENSMUST00000147261	-1978	Lrrc16a
chr5	116293913	116295109	3.97069	1.69541	-1.22776	ENSMUST00000147330	-178	Cit
chr2	130888417	130889021	1.20847	0.169541	-2.83348	ENSMUST00000147333	229	Adam33
chr11	61155349	61155833	0.949513	0.508622	-0.900594	ENSMUST00000147450	254	Slc47a2
chr3	106015853	106016370	0.949513	0.169541	-2.48556	ENSMUST00000147453	-2205	Chi3l4
chr1	10466934	10468597	3.97069	1.86495	-1.09026	ENSMUST00000147575	0	Cpa6
chr14	14287144	14287745	1.38111	0.508622	-1.44116	ENSMUST00000147677	561	Synpr
chr2	135818044	135818731	1.55375	0.339081	-2.19605	ENSMUST00000147744	4434	Plcb4
chr11	32970172	32970848	1.12215	0.508622	-1.1416	ENSMUST00000147896	1623	Gm12114
chr15	81019486	81020072	1.20847	0.508622	-1.24852	ENSMUST00000147921	881	Mkl1
chr2	105513195	105513722	1.46743	0.678163	-1.11359	ENSMUST00000147923	-490	Pax6
chr6	148728635	148729219	1.03583	0.339081	-1.61109	ENSMUST00000147955	1946	Ipo8
chr8	109857806	109858461	1.20847	0.169541	-2.83348	ENSMUST00000148006	-3947	Nfat5
chr16	38536406	38536947	1.03583	0.508622	-1.02613	ENSMUST00000148093	1105	Poglut1
chr17	87780034	87780721	1.46743	0.678163	-1.11359	ENSMUST00000148126	1843	Ttc7
chr8	67557817	67558376	1.29479	0.678163	-0.933016	ENSMUST00000148141	2620	Gm10664
chr7	117919930	117920447	0.949513	0.169541	-2.48556	ENSMUST00000148292	-757	Ampd3
chr17	29063818	29064377	1.03583	0.339081	-1.61109	ENSMUST00000148464	1412	Gm16191
chr3	108276980	108277532	1.29479	0.169541	-2.93302	ENSMUST00000148493	-3982	5330417C22Rik
chr19	7686484	7687210	1.20847	0.169541	-2.83348	ENSMUST00000148558	0	Hrasls5
chr7	88203106	88203738	1.20847	0.508622	-1.24852	ENSMUST00000148597	-261	Gm16012
chr11	62734133	62734891	1.98535	0.678163	-1.54969	ENSMUST00000148598	204	Gm12284
chr3	36923795	36924328	0.949513	0.339081	-1.48556	ENSMUST00000148698	449	4932438A13Rik
chr4	128363426	128363952	0.949513	0.508622	-0.900594	ENSMUST00000148723	-2030	Phc2
chr11	112600867	112601362	1.20847	0.169541	-2.83348	ENSMUST00000148724	4230	BC006965
chr13	23621234	23625966	15.9691	8.30749	-0.942797	ENSMUST00000148743	0	Gm11335
chr4	11120835	11121372	0.949513	0.169541	-2.48556	ENSMUST00000149075	1093	Ccne2
chr18	38785486	38786164	1.46743	0.339081	-2.11359	ENSMUST00000149112	-777	Arhgap26
chr16	91463819	91464446	1.55375	0.678163	-1.19605	ENSMUST00000149172	-903	A930006K02Rik
chr2	180722402	180723250	1.81271	0.339081	-2.41844	ENSMUST00000149179	1164	Col20a1
chr12	85393878	85394425	1.38111	0.508622	-1.44116	ENSMUST00000149307	333	4732463B04Rik
chr2	84488176	84488884	1.29479	0.678163	-0.933016	ENSMUST00000149317	0	Ctnnd1
chr10	87904164	87904706	0.949513	0.339081	-1.48556	ENSMUST00000149562	3974	Gm16235
chr2	118573110	118573862	1.89903	1.01724	-0.900594	ENSMUST00000149978	1618	5430417L22Rik
chr16	4627359	4627997	1.12215	0.169541	-2.72657	ENSMUST00000150028	875	Coro7
chr18	32176415	32177153	1.46743	0.678163	-1.11359	ENSMUST00000150084	-4241	Gm16344
chr2	152829447	152829923	1.03583	0.508622	-1.02613	ENSMUST00000150218	932	Ttll9
chr5	149552148	149552709	1.46743	0.508622	-1.52863	ENSMUST00000150265	-707	2210417A02Rik
chr10	83188911	83189668	1.46743	0.339081	-2.11359	ENSMUST00000150459	3303	1500009L16Rik
chr1	178863075	178863678	1.20847	0.339081	-1.83348	ENSMUST00000150600	-234	Gm15423
chr13	52680328	52681042	1.29479	0.339081	-1.93302	ENSMUST00000150672	1458	Sykb
chr6	81996062	81996591	0.949513	0.339081	-1.48556	ENSMUST00000150691	4382	Fam176a
chr11	119911071	119911836	1.89903	0.508622	-1.90059	ENSMUST00000150730	-2591	Aatk
chr18	82729622	82730233	1.29479	0.508622	-1.34805	ENSMUST00000150952	-2421	Mbp
chr9	89971400	89972031	1.12215	0.339081	-1.72657	ENSMUST00000151219	4868	Ctsh
chr16	18543131	18544003	2.33062	1.18678	-0.973658	ENSMUST00000151253	-4833	Gnb1l
chr2	73938623	73939302	1.38111	0.508622	-1.44116	ENSMUST00000151443	1098	A630050E04Rik
chr11	50200621	50201173	0.949513	0.169541	-2.48556	ENSMUST00000151537	2158	Hnrnph1
chr5	93633595	93634132	1.03583	0.339081	-1.61109	ENSMUST00000151568	822	Ccni
chr7	88518983	88519478	1.12215	0.508622	-1.1416	ENSMUST00000151661	-1613	Cpeb1
chr16	48925714	48926300	1.38111	0.339081	-2.02613	ENSMUST00000151950	3561	Dzip3
chr2	38497728	38498295	1.03583	0.508622	-1.02613	ENSMUST00000151981	1115	Psmb7
chr11	18914169	18915327	2.2443	0.847703	-1.40464	ENSMUST00000152073	351	Gm16141
chr14	66962772	66964155	4.83389	2.20403	-1.13304	ENSMUST00000152093	0	Stmn4
chr2	51971297	51971913	1.03583	0.169541	-2.61109	ENSMUST00000152178	3646	Rif1
chr7	139343933	139344644	1.64007	0.847703	-0.952125	ENSMUST00000152302	-1210	Gm15677
chr2	79237264	79238146	2.33062	1.01724	-1.19605	ENSMUST00000152413	-4074	Cerkl
chr17	15508380	15508949	1.29479	0.169541	-2.93302	ENSMUST00000152416	0	Dll1
chr16	50524598	50525595	2.50326	0.847703	-1.56218	ENSMUST00000152443	-822	G730013B05Rik
chr5	37443859	37444817	2.15798	0.847703	-1.34805	ENSMUST00000152445	1706	Jakmip1
chr11	98222001	98223160	3.62541	1.69541	-1.09651	ENSMUST00000152559	2245	Stard3
chr9	69208314	69208814	1.03583	0.508622	-1.02613	ENSMUST00000152570	3241	Gm15511
chr6	145085429	145085938	1.12215	0.169541	-2.72657	ENSMUST00000152571	-79	Lrmp
chrX	57807457	57808098	1.55375	0.339081	-2.19605	ENSMUST00000152669	-2805	Gm14661
chr11	20102470	20103262	1.29479	0.678163	-0.933016	ENSMUST00000152728	860	Rab1
chr2	115166208	115166687	0.949513	0.169541	-2.48556	ENSMUST00000152815	3330	4930528P14Rik
chr18	44816745	44817274	0.949513	0.339081	-1.48556	ENSMUST00000152823	-4045	A930012L18Rik
chr3	103583356	103584046	1.38111	0.678163	-1.02613	ENSMUST00000152867	2020	Gm15886
chr2	53049017	53049455	0.949513	0.169541	-2.48556	ENSMUST00000152922	784	Prpf40a
chr2	121190154	121190948	1.64007	0.339081	-2.27405	ENSMUST00000153040	1502	Ckmt1
chr4	95409345	95410309	2.50326	0.678163	-1.88411	ENSMUST00000153119	4248	Fggy
chr17	55584184	55586986	10.9626	5.76438	-0.927347	ENSMUST00000153220	0	St6gal2
chr4	135581239	135581877	1.46743	0.678163	-1.11359	ENSMUST00000153223	2837	Rpl11
chr4	100954901	100955504	1.03583	0.339081	-1.61109	ENSMUST00000153228	-1322	Gm12801
chr11	113608423	113609042	1.12215	0.339081	-1.72657	ENSMUST00000153453	3427	Cdc42ep4
chr5	136140867	136141371	0.949513	0.169541	-2.48556	ENSMUST00000153500	-4532	Por
chr11	97671827	97672346	0.949513	0.339081	-1.48556	ENSMUST00000153520	4013	Lasp1
chr7	140894235	140894850	1.03583	0.169541	-2.61109	ENSMUST00000153698	0	Uros
chr2	121408853	121409564	1.64007	0.508622	-1.68909	ENSMUST00000153704	185	Frmd5
chr8	46743352	46743905	1.03583	0.339081	-1.61109	ENSMUST00000153798	0	Sorbs2
chr4	45419382	45420047	1.46743	0.508622	-1.52863	ENSMUST00000153904	1472	Mcart1
chr4	139504314	139504813	1.03583	0.169541	-2.61109	ENSMUST00000153921	-4881	4933427I22Rik
chr5	105951586	105952121	1.03583	0.339081	-1.61109	ENSMUST00000153955	3096	Lrrc8c
chr3	65345716	65346301	1.29479	0.678163	-0.933016	ENSMUST00000154094	-3661	Tiparp
chr2	76504731	76505342	1.03583	0.339081	-1.61109	ENSMUST00000154097	-1432	Fkbp7
chr1	182922094	182922733	1.38111	0.508622	-1.44116	ENSMUST00000154133	3569	Ephx1
chr8	86547692	86548235	1.12215	0.339081	-1.72657	ENSMUST00000154171	-1739	Palm3
chr10	79760105	79760847	1.46743	0.678163	-1.11359	ENSMUST00000154212	-989	Apc2
chr8	28091706	28092262	0.949513	0.339081	-1.48556	ENSMUST00000154256	3900	Zfp703
chr1	159309076	159309752	1.38111	0.678163	-1.02613	ENSMUST00000154261	4709	Gm6058
chr4	136677663	136678169	0.949513	0.169541	-2.48556	ENSMUST00000154285	-3606	Gm13001
chr2	173597387	173598170	1.64007	0.678163	-1.27405	ENSMUST00000154306	3688	Vapb
chr2	150466385	150466936	1.12215	0.339081	-1.72657	ENSMUST00000154328	-2535	Acss1
chr2	58176250	58177691	4.92021	2.37357	-1.05166	ENSMUST00000154453	0	Acvr1c
chr4	43000058	43000576	1.29479	0.339081	-1.93302	ENSMUST00000154541	-1366	Vcp
chr12	88357960	88358530	1.12215	0.169541	-2.72657	ENSMUST00000154801	-3760	Tmem63c
chr12	92265877	92266629	1.55375	0.508622	-1.61109	ENSMUST00000154836	1890	4930534B04Rik
chr3	88992313	88993230	1.98535	1.01724	-0.964725	ENSMUST00000155033	409	Fam189b
chrX	158994610	158995179	1.12215	0.339081	-1.72657	ENSMUST00000155043	-4100	Reps2
chr2	83766162	83766866	1.64007	0.678163	-1.27405	ENSMUST00000155127	-2327	Zswim2
chr4	59227478	59227826	0.949513	0.169541	-2.48556	ENSMUST00000155153	1952	Ugcg
chr4	53263303	53263806	1.03583	0.169541	-2.61109	ENSMUST00000155178	4237	4930522O17Rik
chr11	77504844	77505424	1.12215	0.339081	-1.72657	ENSMUST00000155238	3743	Nufip2
chr2	164283357	164284366	2.2443	1.18678	-0.91921	ENSMUST00000155250	771	Sys1
chr2	158435137	158436127	2.41694	1.18678	-1.02613	ENSMUST00000155319	200	Gm14204
chr4	126515305	126515890	1.20847	0.339081	-1.83348	ENSMUST00000155341	2784	AU040320
chr6	35234083	35234636	0.949513	0.169541	-2.48556	ENSMUST00000155366	3539	Slc13a4
chr13	23404658	23406042	6.38764	3.39081	-0.913651	ENSMUST00000155432	0	4930557F10Rik
chr11	117648693	117649300	1.20847	0.339081	-1.83348	ENSMUST00000155505	-2325	Gm11723
chr8	125800217	125800862	1.12215	0.339081	-1.72657	ENSMUST00000155510	0	Fanca
chr2	122130223	122130809	1.12215	0.169541	-2.72657	ENSMUST00000155561	639	Duoxa1
chr2	120070352	120071653	5.17916	2.37357	-1.12566	ENSMUST00000155641	0	Gm13997
chr11	119119163	119121133	9.75409	4.5776	-1.09142	ENSMUST00000155683	0	Ccdc40
chr11	54951650	54952242	1.46743	0.508622	-1.52863	ENSMUST00000155883	1106	Gm12233
chr5	68168798	68169413	1.29479	0.678163	-0.933016	ENSMUST00000155911	-801	Atp8a1
chr11	100754757	100755609	1.81271	0.169541	-3.41844	ENSMUST00000155972	0	Stat3
chr4	6352792	6353313	0.949513	0.339081	-1.48556	ENSMUST00000156078	-1658	Nsmaf
chr4	117377761	117378604	1.81271	0.508622	-1.83348	ENSMUST00000156081	4970	Gm12840
chr16	14401590	14402377	1.46743	0.169541	-3.11359	ENSMUST00000156089	-76	Abcc1
chr11	81402480	81403086	1.38111	0.339081	-2.02613	ENSMUST00000156193	1619	Gm11418
chr8	108195737	108196293	1.03583	0.169541	-2.61109	ENSMUST00000156436	-3618	Ctcf
chr11	77024545	77025061	0.949513	0.169541	-2.48556	ENSMUST00000156488	-4728	Ssh2
chr4	62889606	62890404	1.55375	0.678163	-1.19605	ENSMUST00000156519	-4916	Col27a1
chrX	163064197	163064860	1.38111	0.339081	-2.02613	ENSMUST00000156526	-4724	Gm15226
chr14	62960965	62961833	2.07167	0.339081	-2.61109	ENSMUST00000156608	-4303	Rnaseh2b
chr2	35570259	35570795	1.03583	0.169541	-2.61109	ENSMUST00000156669	4414	Dab2ip
chr7	26595332	26595851	1.03583	0.339081	-1.61109	ENSMUST00000156714	4561	Cyp2s1
chr10	10801292	10801891	1.12215	0.339081	-1.72657	ENSMUST00000156826	158	Grm1
chr2	62179715	62181019	2.58958	1.35633	-0.933016	ENSMUST00000156871	2185	Dpp4
chr11	5736192	5736629	1.03583	0.508622	-1.02613	ENSMUST00000156913	0	Polm
chr15	81704277	81704907	1.29479	0.678163	-0.933016	ENSMUST00000157003	1365	Aco2
chr11	37049010	37050977	6.90555	2.88219	-1.26059	ENSMUST00000157030	0	Odz2
chr2	71587688	71588299	1.55375	0.169541	-3.19605	ENSMUST00000157059	0	Gm13662
chr10	85562645	85563208	0.949513	0.169541	-2.48556	ENSMUST00000157186	1930	SNORA73
chr13	21988277	21988778	1.03583	0.339081	-1.61109	ENSMUST00000157523	141	Mir1983
chr14	101154490	101155266	1.38111	0.169541	-3.02613	ENSMUST00000157535	4220	U6
chr19	34874528	34875114	1.12215	0.169541	-2.72657	ENSMUST00000157587	3862	U1
chr10	5775074	5775582	0.949513	0.339081	-1.48556	ENSMUST00000157750	-2746	RNase_MRP
chr2	115468561	115469119	0.949513	0.508622	-0.900594	ENSMUST00000157981	4102	Mir1951
chr4	94150501	94151054	1.03583	0.508622	-1.02613	ENSMUST00000158052	-3520	SNORA2
chr17	88861917	88862535	1.03583	0.508622	-1.02613	ENSMUST00000158244	-3122	snoU13
chrX	79424092	79424871	1.64007	0.847703	-0.952125	ENSMUST00000158415	301	RNaseP_nuc
chr13	47072072	47072616	0.949513	0.339081	-1.48556	ENSMUST00000158506	-3473	SNORA18
chr12	99840179	99840942	1.46743	0.339081	-2.11359	ENSMUST00000158726	2938	U7
chr1	187944868	187945264	0.949513	0.169541	-2.48556	ENSMUST00000158738	-1816	5S_rRNA
chr7	80801352	80801960	1.12215	0.169541	-2.72657	ENSMUST00000158766	-4974	7SK
chr10	6172358	6173000	1.20847	0.508622	-1.24852	ENSMUST00000158848	3655	U8
chr15	44782861	44783433	1.03583	0.169541	-2.61109	ENSMUST00000158964	3213	SNORA48
chr10	86343065	86343701	1.20847	0.339081	-1.83348	ENSMUST00000159023	-1363	Stab2
chr17	87759933	87761046	2.93486	1.52587	-0.943663	ENSMUST00000159031	2757	0610012D04Rik
chr12	16766592	16767613	2.58958	0.169541	-3.93302	ENSMUST00000159120	-2592	Greb1
chr1	167709435	167709977	0.949513	0.169541	-2.48556	ENSMUST00000159138	-1229	Gm16565
chr18	74175500	74175930	0.949513	0.169541	-2.48556	ENSMUST00000159260	-1631	D730045A05Rik
chr15	85919997	85921073	2.15798	0.339081	-2.66998	ENSMUST00000159271	0	Gm15722
chr9	13424341	13424895	1.03583	0.508622	-1.02613	ENSMUST00000159294	0	Maml2
chr1	174459895	174461453	3.36646	1.18678	-1.50417	ENSMUST00000159395	3356	Ccdc19
chr6	70823263	70824161	1.72639	0.678163	-1.34805	ENSMUST00000159401	-4394	Eif2ak3
chr10	43041424	43041972	1.03583	0.169541	-2.61109	ENSMUST00000159442	2260	Gm16546
chr10	61873411	61873863	0.949513	0.339081	-1.48556	ENSMUST00000159454	690	Hkdc1
chr3	101997597	101998312	1.55375	0.339081	-2.19605	ENSMUST00000159586	3517	Vangl1
chr17	10648367	10649314	1.81271	0.678163	-1.41844	ENSMUST00000159602	0	A230009B12Rik
chr5	122233938	122234472	1.03583	0.508622	-1.02613	ENSMUST00000159828	-611	Atxn2
chr16	23017885	23018342	1.03583	0.508622	-1.02613	ENSMUST00000159889	-775	Gm6493
chr1	137269517	137270116	1.20847	0.508622	-1.24852	ENSMUST00000159918	0	Shisa4
chr5	14933507	14934123	1.20847	0.169541	-2.83348	ENSMUST00000159973	4307	Speer4e
chr19	47840713	47841556	1.64007	0.508622	-1.68909	ENSMUST00000159999	-2636	Wdr96
chr16	60603385	60603880	0.949513	0.169541	-2.48556	ENSMUST00000160040	-712	Gm9017
chr10	70088036	70088451	0.949513	0.169541	-2.48556	ENSMUST00000160127	690	Phyhipl
chr6	8368886	8369630	1.38111	0.339081	-2.02613	ENSMUST00000160253	-48	Gm16039
chr10	61120608	61121234	1.20847	0.169541	-2.83348	ENSMUST00000160607	-4202	Ppa1
chr18	38375549	38376296	1.38111	0.678163	-1.02613	ENSMUST00000160721	-3843	Pcdh1
chr3	64645852	64646474	1.20847	0.508622	-1.24852	ENSMUST00000160778	2040	Vmn2r7
chr5	99445828	99446444	1.72639	0.678163	-1.34805	ENSMUST00000160819	4798	Gm3470
chr1	194995536	194996056	1.03583	0.339081	-1.61109	ENSMUST00000160822	1295	A130010J15Rik
chr13	73839405	73840062	1.20847	0.508622	-1.24852	ENSMUST00000160958	-1102	5430425J12Rik
chr16	38767246	38767842	1.12215	0.169541	-2.72657	ENSMUST00000161010	4244	B4galt4
chr6	63209745	63210995	3.1075	1.18678	-1.3887	ENSMUST00000161105	2927	Grid2
chr11	62186989	62187443	1.03583	0.169541	-2.61109	ENSMUST00000161116	-4187	Ncor1
chr9	112135371	112135979	1.29479	0.508622	-1.34805	ENSMUST00000161138	152	Arpp21
chr3	137810901	137811452	1.03583	0.339081	-1.61109	ENSMUST00000161141	4029	Rg9mtd2
chr14	11285253	11287050	5.61076	1.69541	-1.72657	ENSMUST00000161302	0	Fhit
chr6	140575442	140576123	1.55375	0.678163	-1.19605	ENSMUST00000161335	41	Aebp2
chr1	186648097	186649286	2.58958	1.18678	-1.12566	ENSMUST00000161341	-1184	Mosc2
chr3	141124822	141125761	1.89903	0.508622	-1.90059	ENSMUST00000161394	2537	Gm15688
chr3	58674509	58675200	1.46743	0.169541	-3.11359	ENSMUST00000161419	-4791	Clrn1
chr19	42641843	42642402	1.03583	0.169541	-2.61109	ENSMUST00000161422	3114	D19Ertd386e
chr1	99875040	99875698	1.29479	0.508622	-1.34805	ENSMUST00000161567	-1209	Pam
chr14	79642312	79643625	3.02118	0.847703	-1.83348	ENSMUST00000161649	3479	Zfp957
chr1	85251413	85252479	1.98535	0.678163	-1.54969	ENSMUST00000161685	-291	C130026I21Rik
chr12	83712468	83713037	1.12215	0.169541	-2.72657	ENSMUST00000161801	-4875	Rgs6
chr17	13002748	13003842	3.02118	1.18678	-1.34805	ENSMUST00000161890	-4955	Airn
chr13	63973885	63974384	1.12215	0.339081	-1.72657	ENSMUST00000162086	124	0610007P08Rik
chr5	21459019	21459689	1.29479	0.339081	-1.93302	ENSMUST00000162103	-703	Dnaja1-ps
chr5	15185626	15186091	1.12215	0.339081	-1.72657	ENSMUST00000162113	-437	Speer7-ps1
chr12	71556235	71556750	0.949513	0.508622	-0.900594	ENSMUST00000162277	-275	Tmx1
chr5	100042615	100043299	1.38111	0.508622	-1.44116	ENSMUST00000162286	-2164	Gm16228
chr13	63508039	63508640	1.20847	0.339081	-1.83348	ENSMUST00000162375	-435	Fancc
chr8	23338974	23339747	1.46743	0.339081	-2.11359	ENSMUST00000162447	1142	Thsd1
chr1	57446975	57447503	1.03583	0.339081	-1.61109	ENSMUST00000162663	113	1110034B05Rik
chr10	98628858	98629765	1.89903	0.847703	-1.16363	ENSMUST00000162704	-4153	Poc1b
chr3	65589871	65590653	1.38111	0.508622	-1.44116	ENSMUST00000162712	1935	Lekr1
chr8	3645000	3646453	5.95604	2.54311	-1.22776	ENSMUST00000162832	3390	Stxbp2
chr10	18190918	18191657	1.72639	0.508622	-1.76309	ENSMUST00000162891	1133	Nhsl1
chr1	85161784	85162460	1.29479	0.678163	-0.933016	ENSMUST00000162896	4348	Gm6264
chr8	88369357	88369993	1.20847	0.508622	-1.24852	ENSMUST00000162981	2409	Phkb
chr10	51741483	51742197	1.81271	0.169541	-3.41844	ENSMUST00000163017	-111	Vgll2
chr1	40572240	40572745	0.949513	0.169541	-2.48556	ENSMUST00000163057	0	Il18rap
chr7	52146193	52146877	1.29479	0.339081	-1.93302	ENSMUST00000163197	903	Med25
chr8	112695807	112696395	1.12215	0.339081	-1.72657	ENSMUST00000163426	-3698	Calb2
chr18	49912709	49913304	1.20847	0.169541	-2.83348	ENSMUST00000163590	1952	Dtwd2
chr6	60780983	60781512	1.03583	0.508622	-1.02613	ENSMUST00000163779	-1135	Snca
chr5	136780130	136780753	1.20847	0.508622	-1.24852	ENSMUST00000163906	-1740	Cux1
chr1	130255411	130257003	5.52444	2.88219	-0.938662	ENSMUST00000164171	0	Mcm6
chr8	84367056	84367674	1.20847	0.508622	-1.24852	ENSMUST00000164264	-582	Inpp4b
chr17	8424580	8425074	1.03583	0.508622	-1.02613	ENSMUST00000164411	-4003	Ccr6
chr14	64113258	64113868	1.20847	0.339081	-1.83348	ENSMUST00000164515	724	Gm17232
chr8	18660422	18660981	1.03583	0.169541	-2.61109	ENSMUST00000164712	-3434	Gm17149
chr5	116481052	116481963	2.07167	0.678163	-1.61109	ENSMUST00000164753	360	Gm17420
chr14	32008246	32009241	2.07167	1.01724	-1.02613	ENSMUST00000164956	-2442	Nisch
chr5	150917156	150917738	1.12215	0.169541	-2.72657	ENSMUST00000165030	-3504	Fry
chr10	57354427	57355001	1.20847	0.169541	-2.83348	ENSMUST00000165038	2529	Pkib
chr9	48889615	48890163	1.12215	0.169541	-2.72657	ENSMUST00000165088	252	Tmprss5
chr15	83265845	83266413	1.12215	0.508622	-1.1416	ENSMUST00000165095	-2566	Pacsin2
chr3	131002584	131003313	2.07167	1.01724	-1.02613	ENSMUST00000165362	-2248	4930534D22Rik
chr13	84359514	84360077	1.20847	0.339081	-1.83348	ENSMUST00000165382	1704	A230107N01Rik
chr10	40600975	40601587	1.29479	0.339081	-1.93302	ENSMUST00000165426	1338	Cdc40
chr2	129047181	129047913	1.20847	0.169541	-2.83348	ENSMUST00000165505	2419	A730036I17Rik
chr12	108854877	108855975	3.28014	1.35633	-1.27405	ENSMUST00000165520	3669	Gm9006
chr16	88674642	88675249	1.12215	0.508622	-1.1416	ENSMUST00000165580	-2744	Krtap27-1
chr1	191511262	191512017	1.98535	0.508622	-1.96472	ENSMUST00000165663	0	Cenpf
chr16	26527323	26529569	8.0277	2.71265	-1.56528	ENSMUST00000165687	-467	Tmem207
chr19	44589928	44590514	1.55375	0.508622	-1.61109	ENSMUST00000165758	4570	Sec31b
chr13	59717878	59718328	1.03583	0.169541	-2.61109	ENSMUST00000165841	-944	Naa35
chr12	112773402	112774016	1.20847	0.508622	-1.24852	ENSMUST00000166123	-2296	Eif5
chr6	28797434	28798127	1.38111	0.678163	-1.02613	ENSMUST00000166136	-780	Snd1
chr15	95363132	95363734	1.03583	0.339081	-1.61109	ENSMUST00000166170	-3996	Nell2
chr6	115717326	115717818	1.12215	0.508622	-1.1416	ENSMUST00000166254	-4843	Tmem40
chr13	94267401	94267964	1.20847	0.339081	-1.83348	ENSMUST00000166304	1681	Jmy
chr18	82697200	82697781	1.29479	0.678163	-0.933016	ENSMUST00000166332	-3762	Rpl21-ps8
chr10	77813127	77813785	1.29479	0.678163	-0.933016	ENSMUST00000166360	661	Agpat3
chr3	86351865	86352423	1.03583	0.169541	-2.61109	ENSMUST00000166434	0	Lrba
chr5	123680048	123680592	1.20847	0.508622	-1.24852	ENSMUST00000166451	289	Gm17627
chr6	29268723	29269512	2.41694	1.01724	-1.24852	ENSMUST00000166462	0	Fam71f1
chr6	82351943	82353672	3.5391	1.52587	-1.21375	ENSMUST00000166470	0	Tacr1
chr4	119488490	119490119	3.62541	1.69541	-1.09651	ENSMUST00000166542	1159	Hivep3
chr10	59327583	59328134	1.03583	0.339081	-1.61109	ENSMUST00000166565	3319	Cbara1
chr5	98609894	98610522	1.12215	0.508622	-1.1416	ENSMUST00000166594	0	Prdm8
chr7	147265460	147266034	1.12215	0.169541	-2.72657	ENSMUST00000166758	2134	Caly
chr6	101147696	101148839	2.84854	1.35633	-1.07052	ENSMUST00000166894	0	Gm17519
chr6	108603147	108603801	1.38111	0.508622	-1.44116	ENSMUST00000166951	-3110	Gm17055
chr6	137362030	137362970	1.89903	0.508622	-1.90059	ENSMUST00000167002	2790	Ptpro
chr8	20021535	20021998	1.03583	0.339081	-1.61109	ENSMUST00000167037	-1123	2610005L07Rik
chr9	26964648	26965244	1.29479	0.678163	-0.933016	ENSMUST00000167074	-1646	Jam3
chr6	50143933	50144493	0.949513	0.339081	-1.48556	ENSMUST00000167319	0	Mpp6
chr16	45400689	45401186	1.03583	0.169541	-2.61109	ENSMUST00000167355	-265	Cd200
chr1	146391537	146392215	1.38111	0.508622	-1.44116	ENSMUST00000167373	-3096	Rgs21
chr15	9003965	9004539	1.03583	0.508622	-1.02613	ENSMUST00000167428	2798	1110020G09Rik
chr11	22510672	22511437	1.89903	0.847703	-1.16363	ENSMUST00000167494	0	Gm17335
chr16	16907925	16908389	0.949513	0.508622	-0.900594	ENSMUST00000167530	4513	Ppm1f
chr17	8017780	8018643	1.98535	1.01724	-0.964725	ENSMUST00000167580	1525	Fndc1
chr17	30744979	30745574	1.03583	0.508622	-1.02613	ENSMUST00000167624	4031	Glo1
chr15	79522114	79522734	1.20847	0.508622	-1.24852	ENSMUST00000167631	82	Gm17487
chr19	23981787	23982385	1.29479	0.508622	-1.34805	ENSMUST00000167716	2842	Apba1
chr10	79336317	79337664	4.05701	1.18678	-1.77336	ENSMUST00000167897	0	BC005764
chr15	99475281	99475913	1.20847	0.508622	-1.24852	ENSMUST00000168025	-1872	Racgap1
chr4	126141497	126142091	1.12215	0.339081	-1.72657	ENSMUST00000168183	-338	Eif2c1
chr8	19883749	19884577	1.81271	0.678163	-1.41844	ENSMUST00000168202	-3478	Gm17279
chr8	124429558	124430419	1.89903	0.847703	-1.16363	ENSMUST00000168262	1168	Slc7a5
chr5	122375220	122376614	3.71173	1.69541	-1.13046	ENSMUST00000168288	-297	Cux2
chr3	137578797	137579299	0.949513	0.169541	-2.48556	ENSMUST00000168345	-2191	Lamtor3
chr16	75572485	75572982	0.949513	0.508622	-0.900594	ENSMUST00000168417	1504	Gm17459
chr6	101326721	101327329	1.46743	0.678163	-1.11359	ENSMUST00000168467	8	Pdzrn3
chr5	114312896	114313553	1.29479	0.339081	-1.93302	ENSMUST00000168493	-4114	Coro1c
chr17	3526715	3527628	1.98535	0.508622	-1.96472	ENSMUST00000168560	-4926	Cldn20
chr4	56956816	56957688	1.55375	0.508622	-1.61109	ENSMUST00000168585	2596	D730040F13Rik
chr11	66893493	66894513	3.45278	1.52587	-1.17813	ENSMUST00000168628	1659	Myh3
chr19	37276691	37277724	2.33062	1.18678	-0.973658	ENSMUST00000168721	4040	Cpeb3
chr15	84560247	84560878	1.20847	0.169541	-2.83348	ENSMUST00000168811	-2444	Arhgap8
chr17	29659850	29661355	7.42347	2.20403	-1.75195	ENSMUST00000168877	-3116	Gm17657
chr1	57833888	57834473	1.20847	0.339081	-1.83348	ENSMUST00000168895	2129	Spats2l
chr17	57176785	57177410	1.12215	0.339081	-1.72657	ENSMUST00000169012	3661	Slc25a41
chr17	25013060	25013705	1.29479	0.678163	-0.933016	ENSMUST00000169038	-895	Igfals
chr4	84531756	84532313	1.12215	0.508622	-1.1416	ENSMUST00000169371	1389	Cntln
chr17	6317297	6317988	1.72639	0.847703	-1.02613	ENSMUST00000169415	0	Dynlt1a
chr19	47242866	47243682	2.07167	1.01724	-1.02613	ENSMUST00000169692	1943	Gm6970
chr3	10247955	10248541	1.20847	0.508622	-1.24852	ENSMUST00000169802	3848	Fabp12
chr3	41295762	41296496	1.38111	0.678163	-1.02613	ENSMUST00000169830	619	C430002E04Rik
chr10	34020542	34020994	1.12215	0.339081	-1.72657	ENSMUST00000169908	-1830	Gm17321
chr13	97438594	97439166	1.03583	0.508622	-1.02613	ENSMUST00000169966	444	Hmgcr
chrX	166422380	166423624	2.76222	1.01724	-1.44116	ENSMUST00000169983	0	Gm17379
chr7	133316097	133316730	1.03583	0.339081	-1.61109	ENSMUST00000169993	-2908	Gm17136
chr10	92497784	92498460	1.29479	0.508622	-1.34805	ENSMUST00000170065	-219	4930485B16Rik
chr14	8623750	8624563	1.98535	0.339081	-2.54969	ENSMUST00000170177	0	Gm10044
chr15	64749578	64751044	3.5391	1.86495	-0.924246	ENSMUST00000170178	2815	Adcy8
chr6	65088428	65089002	1.03583	0.508622	-1.02613	ENSMUST00000170252	-164	Hpgds
chr1	170143818	170144435	1.12215	0.339081	-1.72657	ENSMUST00000170399	-4091	Pbx1
chr19	6918053	6918663	1.12215	0.169541	-2.72657	ENSMUST00000170516	-2939	Rps6ka4
chr17	15966277	15967058	1.72639	0.847703	-1.02613	ENSMUST00000170578	-2728	Rgmb
chr9	107196663	107197317	1.29479	0.508622	-1.34805	ENSMUST00000170597	-1010	Gm17040
chr11	30852248	30852962	1.29479	0.508622	-1.34805	ENSMUST00000170746	1161	Erlec1
chr5	15441666	15442345	1.46743	0.339081	-2.11359	ENSMUST00000170874	939	Cacna2d1
chr15	12475418	12476311	1.81271	0.339081	-2.41844	ENSMUST00000170963	2797	Pdzd2
chr3	145847731	145848873	3.62541	1.69541	-1.09651	ENSMUST00000170972	-4456	Mcoln2
chr13	111069323	111071661	9.49513	4.5776	-1.0526	ENSMUST00000170993	0	Rab3c
chr12	81206291	81206935	1.29479	0.169541	-2.93302	ENSMUST00000171051	-2086	Gm17591
chr6	133987519	133988065	1.03583	0.339081	-1.61109	ENSMUST00000171113	1470	Etv6
chr10	17631135	17631708	1.12215	0.508622	-1.1416	ENSMUST00000171114	3321	Heca
chr14	27470087	27470681	1.12215	0.169541	-2.72657	ENSMUST00000171207	-1816	Arf4
chr1	158867966	158868349	0.949513	0.169541	-2.48556	ENSMUST00000171292	1170	Ralgps2
chr13	98519239	98519791	1.12215	0.508622	-1.1416	ENSMUST00000171491	-1276	Gm17290
chr4	32507133	32507705	1.03583	0.169541	-2.61109	ENSMUST00000171600	2725	Bach2
chr14	63279054	63279609	1.03583	0.169541	-2.61109	ENSMUST00000171692	-2895	Serpine3
chr13	27737241	27737823	1.03583	0.169541	-2.61109	ENSMUST00000171705	-2880	Prl7a1
chr15	102231672	102232226	0.949513	0.508622	-0.900594	ENSMUST00000171718	-3725	Gm17671
chr6	119985179	119985713	1.03583	0.169541	-2.61109	ENSMUST00000171750	777	Mir706
chr16	4005238	4005763	0.949513	0.508622	-0.900594	ENSMUST00000171762	-1469	Slx4
chrX	68463605	68464570	2.2443	0.847703	-1.40464	ENSMUST00000171933	0	Mtm1
chr11	11711784	11712585	3.1075	1.01724	-1.61109	ENSMUST00000171938	-2820	Fignl1
chr7	130269891	130270482	1.12215	0.339081	-1.72657	ENSMUST00000171948	2123	Tnrc6a
chr14	24411979	24412667	1.29479	0.678163	-0.933016	ENSMUST00000172099	-1057	Kcnma1
chr12	32003325	32003864	1.12215	0.508622	-1.1416	ENSMUST00000172134	-4522	Lamb1
chr7	96783777	96784312	0.949513	0.339081	-1.48556	ENSMUST00000172178	-2144	A230065N10Rik
chr8	71707329	71708817	5.52444	2.88219	-0.938662	ENSMUST00000172413	0	Gm7677
chr11	5282718	5283314	1.20847	0.508622	-1.24852	ENSMUST00000172492	-976	Znrf3
chr8	124501489	124502065	1.12215	0.339081	-1.72657	ENSMUST00000172513	-157	Banp
chr9	79677057	79679380	11.9984	4.74714	-1.33771	ENSMUST00000172740	0	Filip1
chr17	22142878	22143442	1.03583	0.169541	-2.61109	ENSMUST00000172778	0	Zfp943
chr5	24951450	24951983	0.949513	0.169541	-2.48556	ENSMUST00000172802	-4140	RP23-171F16.2
chr3	34454589	34455321	1.38111	0.169541	-3.02613	ENSMUST00000172935	-3929	Sox2ot
chr8	107612515	107613073	1.12215	0.508622	-1.1416	ENSMUST00000173088	0	Ces3b
chr4	44080222	44080726	0.949513	0.339081	-1.48556	ENSMUST00000173274	-290	Gne
chr5	48572715	48573663	2.07167	0.847703	-1.28916	ENSMUST00000173303	0	Slit2
chr15	65760760	65761587	1.72639	0.508622	-1.76309	ENSMUST00000173338	-266	RP23-167B4.4
chr18	66031853	66032441	1.03583	0.508622	-1.02613	ENSMUST00000173985	-33	Grp
chr10	66555930	66556490	1.03583	0.508622	-1.02613	ENSMUST00000174062	-2383	Jmjd1c
chr7	5879116	5879723	1.12215	0.508622	-1.1416	ENSMUST00000174106	2335	Vmn1r-ps45
chr9	118941772	118942362	1.20847	0.339081	-1.83348	ENSMUST00000174132	0	Ctdspl
chrX	50567865	50568524	1.29479	0.339081	-1.93302	ENSMUST00000174390	-4965	Plac1
chr19	28082689	28083548	1.81271	0.847703	-1.09651	ENSMUST00000174420	1733	Rfx3
chr3	34330545	34331261	1.29479	0.169541	-2.93302	ENSMUST00000174440	2759	RP24-396D16.1
chr16	50783968	50784915	2.58958	1.18678	-1.12566	ENSMUST00000174511	379	RP23-76I20.1
chr7	87458881	87459529	1.20847	0.339081	-1.83348	ENSMUST00000174599	1689	Prc1
chr10	17934181	17934651	0.949513	0.339081	-1.48556	ENSMUST00000174631	1491	Ccdc28a
chr12	80111349	80111841	1.20847	0.339081	-1.83348	ENSMUST00000174697	-2736	Tmem229b
chr5	102500557	102501917	2.84854	1.18678	-1.26316	ENSMUST00000174698	-1618	Wdfy3
chr9	32053611	32054303	1.64007	0.678163	-1.27405	ENSMUST00000174730	864	Arhgap32
chr14	106210809	106211339	0.949513	0.169541	-2.48556	ENSMUST00000174923	-4786	AC140340.1
chr2	44877349	44877906	1.12215	0.339081	-1.72657	ENSMUST00000174938	792	AL929120.1
chr12	70463539	70464128	1.20847	0.169541	-2.83348	ENSMUST00000175032	-1072	AC157822.1
chr19	6560356	6560963	1.12215	0.508622	-1.1416	ENSMUST00000175061	-2817	AC124394.1
chr13	84318300	84318825	0.949513	0.169541	-2.48556	ENSMUST00000175099	-3058	CT033785.1
chr11	85735448	85736031	1.03583	0.339081	-1.61109	ENSMUST00000175103	1970	AL592465.1
chr16	36788942	36789500	1.03583	0.339081	-1.61109	ENSMUST00000175199	-324	AC117662.1
chr12	85617581	85618137	0.949513	0.508622	-0.900594	ENSMUST00000175202	2032	AC159649.1
chr9	52565033	52565633	1.12215	0.169541	-2.72657	ENSMUST00000175224	22	AC091260.1
chr19	47991649	47992250	1.20847	0.508622	-1.24852	ENSMUST00000175225	1514	AC126679.1
chr5	118863121	118863860	1.55375	0.678163	-1.19605	ENSMUST00000175300	4968	AC132338.1
chr5	147072441	147073012	1.64007	0.847703	-0.952125	ENSMUST00000175336	0	AC113316.1
chr3	89103161	89104198	2.93486	1.35633	-1.11359	ENSMUST00000175352	-2206	AC132327.1
chr12	78211987	78212498	0.949513	0.169541	-2.48556	ENSMUST00000175373	4922	AC133174.1
chr6	107395911	107396515	1.38111	0.169541	-3.02613	ENSMUST00000175386	2424	AC167724.1
chr7	35871073	35872418	2.93486	1.52587	-0.943663	ENSMUST00000175412	4146	AC149058.1
chr6	86526665	86527368	1.46743	0.508622	-1.52863	ENSMUST00000175421	-2511	AC158662.1
chr4	54486194	54487188	3.71173	1.35633	-1.45239	ENSMUST00000175442	4991	AL772349.1
chr6	18393929	18394555	1.12215	0.508622	-1.1416	ENSMUST00000175530	4786	AC027654.1
chr9	110825011	110825795	1.64007	0.847703	-0.952125	ENSMUST00000175600	-2112	AC139378.1

## Sheet: C-AcH3 AcH4 depleted
AcH3 depleted										AcH4 depleted
chr	start	end	WT	KO	lfc	NearestTSS	DistnaceToTSS	GeneName		chr	start	end	WT	KO	lfc	NearestTSS	DistnaceToTSS	GeneName
chr2	164594768	164597342	14.4282	9.24633	-0.641942	ENSMUST00000001439	0	Ube2c		chr2	164595355	164596288	3.19382	1.52587	-1.06565	ENSMUST00000001439	0	Ube2c
chr9	21854304	21856840	10.2446	5.35769	-0.935179	ENSMUST00000003501	0	Elavl3		chr9	21856611	21857296	1.29479	0.169541	-2.93302	ENSMUST00000003501	-145	Elavl3
chr18	68496175	68498020	6.27548	3.28374	-0.934384	ENSMUST00000007624	0	Mc5r		chr18	68495987	68498245	9.75409	5.08622	-0.939414	ENSMUST00000007624	0	Mc5r
chr11	50135221	50135852	0.965458	0.432071	-1.15994	ENSMUST00000020637	3324	Canx		chr11	50137436	50138042	1.03583	0.508622	-1.02613	ENSMUST00000020637	1134	Canx
chr13	69136485	69139178	13.8382	6.91314	-1.00125	ENSMUST00000022013	0	Adcy2		chr13	69140564	69142005	5.00652	2.20403	-1.18367	ENSMUST00000022013	-2146	Adcy2
chr18	43216462	43220325	10.2982	5.78976	-0.83082	ENSMUST00000025377	0	Ppp2r2b		chr18	43217024	43220396	9.40881	4.91668	-0.936329	ENSMUST00000025377	0	Ppp2r2b
chr18	43549111	43554595	26.2819	16.3323	-0.686342	ENSMUST00000025379	0	Dpysl3		chr18	43548160	43549149	2.2443	0.678163	-1.72657	ENSMUST00000025379	3883	Dpysl3
chr13	120255570	120256279	1.01909	0.432071	-1.23795	ENSMUST00000026519	4006	4833420G17Rik		chr13	120252510	120253093	1.46743	0.339081	-2.11359	ENSMUST00000026519	946	4833420G17Rik
chr7	80663862	80665250	2.03819	1.03697	-0.974911	ENSMUST00000026895	0	Chd2		chr7	80663546	80664166	1.12215	0.339081	-1.72657	ENSMUST00000026895	309	Chd2
chr3	94285586	94286394	1.39455	0.6049	-1.20503	ENSMUST00000029784	2835	Celf3		chr3	94281617	94282287	1.64007	0.847703	-0.952125	ENSMUST00000029784	-466	Celf3
chr4	68612150	68616363	9.9764	5.96259	-0.742581	ENSMUST00000030036	0	Dbc1		chr4	68615450	68616403	2.76222	0.678163	-2.02613	ENSMUST00000030036	-20	Dbc1
chr4	137883585	137884769	3.9691	0.518486	-2.93644	ENSMUST00000030536	-1364	Pink1		chr4	137883594	137884312	2.58958	0.508622	-2.34805	ENSMUST00000030536	-1373	Pink1
chr6	119776697	119777446	1.18	0.518486	-1.18642	ENSMUST00000032279	-1454	Erc1		chr6	119775968	119776392	0.949513	0.508622	-0.900594	ENSMUST00000032279	-725	Erc1
chr7	119301083	119301958	1.71637	1.12339	-0.611507	ENSMUST00000033036	614	Dkk3		chr7	119302396	119303051	1.29479	0.339081	-1.93302	ENSMUST00000033036	0	Dkk3
chrX	70704622	70705076	0.804548	0.345657	-1.21884	ENSMUST00000033737	-240	Haus7		chrX	70703023	70705292	5.7834	2.20403	-1.39177	ENSMUST00000033737	0	Haus7
chr8	13891300	13892048	1.23364	0.777729	-0.665583	ENSMUST00000033839	-1030	2410022L05Rik		chr8	13886265	13886735	1.03583	0.169541	-2.61109	ENSMUST00000033839	3537	2410022L05Rik
chr7	86412537	86413659	1.87728	0.691314	-1.44123	ENSMUST00000037315	-4428	Abhd2		chr7	86416099	86416722	1.12215	0.339081	-1.72657	ENSMUST00000037315	-1365	Abhd2
chr3	146602313	146603073	1.12637	0.6049	-0.896909	ENSMUST00000037942	-3938	Ttll7		chr3	146602231	146603083	1.89903	0.678163	-1.48556	ENSMUST00000037942	-3928	Ttll7
chr4	139800546	139801210	1.23364	0.345657	-1.83551	ENSMUST00000039331	1490	Igsf21		chr4	139801983	139802642	1.72639	0.678163	-1.34805	ENSMUST00000039331	58	Igsf21
chr2	6269970	6270866	1.66273	0.864143	-0.944215	ENSMUST00000042503	-2913	Usp6nl		chr2	6271828	6272463	1.20847	0.339081	-1.83348	ENSMUST00000042503	-1316	Usp6nl
chr6	72184792	72185783	1.77001	0.950557	-0.896909	ENSMUST00000042646	0	Atoh8		chr6	72185004	72185939	1.98535	1.01724	-0.964725	ENSMUST00000042646	0	Atoh8
chr1	97562360	97565189	7.61639	4.14789	-0.876731	ENSMUST00000043336	0	St8sia4		chr1	97562920	97564987	6.81923	2.88219	-1.24244	ENSMUST00000043336	0	St8sia4
chr10	33998783	33999383	1.01909	0.345657	-1.55987	ENSMUST00000061372	-2613	Tspyl1		chr10	34003720	34004259	1.29479	0.678163	-0.933016	ENSMUST00000061372	1726	Tspyl1
chr1	173289652	173292437	8.42094	2.59243	-1.69968	ENSMUST00000061878	0	Klhdc9		chr1	173290447	173291802	5.43812	1.69541	-1.68148	ENSMUST00000061878	0	Klhdc9
chr9	121846274	121848593	7.13366	2.16036	-1.72337	ENSMUST00000063103	0	1700048O20Rik		chr9	121846456	121847751	5.69708	1.69541	-1.74859	ENSMUST00000063103	0	1700048O20Rik
chr17	79312152	79313291	2.41364	0.864143	-1.48187	ENSMUST00000063817	-2548	1110001A16Rik		chr17	79311932	79312794	2.07167	0.508622	-2.02613	ENSMUST00000063817	-3045	1110001A16Rik
chr18	32111063	32111832	1.18	0.345657	-1.77138	ENSMUST00000064016	-1774	Gpr17		chr18	32108744	32109501	2.76222	1.18678	-1.21877	ENSMUST00000064016	0	Gpr17
chr19	29177979	29178585	0.858185	0.172829	-2.31195	ENSMUST00000064393	2116	Rcl1		chr19	29179530	29180061	0.949513	0.339081	-1.48556	ENSMUST00000064393	3667	Rcl1
chr4	35791638	35792697	1.82364	0.950557	-0.939978	ENSMUST00000065173	0	Lingo2		chr4	35791173	35793138	9.66777	2.71265	-1.83348	ENSMUST00000065173	0	Lingo2
chr6	5063387	5063968	0.858185	0.432071	-0.990018	ENSMUST00000065842	0	Ppp1r9a		chr6	5063236	5063771	1.03583	0.169541	-2.61109	ENSMUST00000065842	0	Ppp1r9a
chr1	181178870	181179564	1.12637	0.259243	-2.1193	ENSMUST00000068437	0	Smyd3		chr1	181179901	181180315	1.29479	0.678163	-0.933016	ENSMUST00000068437	-931	Smyd3
chr16	34902655	34903309	1.01909	0.345657	-1.55987	ENSMUST00000068988	2329	Mylk		chr16	34902097	34902520	1.03583	0.508622	-1.02613	ENSMUST00000068988	1771	Mylk
chr7	91831056	91832128	1.82364	0.777729	-1.22948	ENSMUST00000069537	-3196	Zfand6		chr7	91822904	91823446	1.03583	0.169541	-2.61109	ENSMUST00000069537	4416	Zfand6
chr9	72017409	72018289	1.50182	0.777729	-0.949376	ENSMUST00000071965	4499	Gm7866		chr9	72017464	72018579	4.83389	2.20403	-1.13304	ENSMUST00000071965	4209	Gm7866
chr6	79968380	79971169	10.2446	4.92561	-1.05649	ENSMUST00000074662	0	Lrrtm4		chr6	79970481	79971167	1.46743	0.678163	-1.11359	ENSMUST00000074662	846	Lrrtm4
chr11	47192195	47193177	1.82364	0.864143	-1.07748	ENSMUST00000077221	0	Sgcd		chr11	47192056	47192933	1.81271	0.508622	-1.83348	ENSMUST00000077221	92	Sgcd
chr19	48278419	48282315	11.8	6.39466	-0.883853	ENSMUST00000078880	0	Sorcs3		chr19	48281437	48281937	1.12215	0.508622	-1.1416	ENSMUST00000078880	924	Sorcs3
chr5	121458739	121459733	1.55546	0.777729	-1	ENSMUST00000079204	0	Rph3a		chr5	121459214	121459771	1.38111	0.339081	-2.02613	ENSMUST00000079204	0	Rph3a
chr19	7680740	7682001	2.14546	1.29621	-0.726984	ENSMUST00000079902	0	Lgals12		chr19	7680990	7681808	1.46743	0.678163	-1.11359	ENSMUST00000079902	0	Lgals12
chr2	181493885	181495149	2.03819	0.864143	-1.23795	ENSMUST00000081125	-2888	Myt1		chr2	181493377	181493904	1.03583	0.508622	-1.02613	ENSMUST00000081125	-4133	Myt1
chr12	32630907	32631670	1.07273	0.172829	-2.63387	ENSMUST00000081639	3731	Hbp1		chr12	32632294	32632882	1.12215	0.169541	-2.72657	ENSMUST00000081639	2519	Hbp1
chr5	77540575	77541213	0.965458	0.345657	-1.48187	ENSMUST00000081964	2974	Hopx		chr5	77543909	77544748	2.2443	1.01724	-1.1416	ENSMUST00000081964	0	Hopx
chr1	190832963	190833671	0.965458	0.345657	-1.48187	ENSMUST00000085678	-1245	Kctd3		chr1	190834300	190834859	1.03583	0.508622	-1.02613	ENSMUST00000085678	-2582	Kctd3
chr2	118379258	118380613	6.43638	0.432071	-3.89691	ENSMUST00000090219	-3836	Bmf		chr2	118379585	118380657	5.17916	0.508622	-3.34805	ENSMUST00000090219	-4163	Bmf
chr3	96051092	96053901	11.6928	6.82673	-0.77635	ENSMUST00000091711	420	Hist2h3c1		chr3	96052647	96053178	1.03583	0.339081	-1.61109	ENSMUST00000091711	1975	Hist2h3c1
chr10	32614167	32614905	1.28728	0.6049	-1.08955	ENSMUST00000092602	-3900	Nkain2		chr10	32605717	32606139	1.03583	0.169541	-2.61109	ENSMUST00000092602	4130	Nkain2
chr10	28936213	28938193	2.95001	1.29621	-1.18642	ENSMUST00000092627	4766	9330159F19Rik		chr10	28935936	28936539	1.20847	0.339081	-1.83348	ENSMUST00000092627	4489	9330159F19Rik
chr5	111844867	111850726	26.6574	16.0731	-0.72989	ENSMUST00000094463	0	Mn1		chr5	111847726	111848303	1.12215	0.508622	-1.1416	ENSMUST00000094463	1266	Mn1
chr7	17576584	17577618	1.66273	0.6049	-1.45879	ENSMUST00000094805	-439	Ccdc8		chr7	17579879	17580436	1.03583	0.339081	-1.61109	ENSMUST00000094805	1824	Ccdc8
chr4	128919583	128920269	1.12637	0.6049	-0.896909	ENSMUST00000097873	-3166	C77080		chr4	128918336	128919110	1.81271	0.847703	-1.09651	ENSMUST00000097873	-1919	C77080
chr13	120279481	120280396	1.39455	0.691314	-1.01239	ENSMUST00000099147	-1115	Gm7120		chr13	120280830	120282828	4.48861	1.35633	-1.72657	ENSMUST00000099147	0	Gm7120
chr2	148264865	148266154	2.03819	1.2098	-0.752519	ENSMUST00000099269	3146	Cd93		chr2	148272237	148272745	0.949513	0.339081	-1.48556	ENSMUST00000099269	-2939	Cd93
chr13	9493355	9494945	2.89637	1.72829	-0.744906	ENSMUST00000099913	1008	Dip2c		chr13	9493306	9493891	1.29479	0.169541	-2.93302	ENSMUST00000099913	959	Dip2c
chr4	102093222	102094625	2.62819	1.38263	-0.926656	ENSMUST00000106904	0	Pde4b		chr4	102093186	102095105	5.09284	2.54311	-1.00188	ENSMUST00000106904	0	Pde4b
chr3	37621512	37622989	3.3791	1.72829	-0.967298	ENSMUST00000108105	263	Gm5148		chr3	37620681	37621087	0.949513	0.508622	-0.900594	ENSMUST00000108105	2165	Gm5148
chr3	26537752	26538568	1.28728	0.518486	-1.31195	ENSMUST00000108305	1182	Spata16		chr3	26540787	26541528	1.29479	0.169541	-2.93302	ENSMUST00000108305	4217	Spata16
chr8	48439709	48440480	1.34091	0.864143	-0.633875	ENSMUST00000110367	-2008	Stox2		chr8	48435536	48436087	1.12215	0.169541	-2.72657	ENSMUST00000110367	1616	Stox2
chr9	123833584	123834545	1.82364	0.518486	-1.81445	ENSMUST00000111443	-2315	Gm4694		chr9	123832315	123833279	1.81271	0.678163	-1.41844	ENSMUST00000111443	-3581	Gm4694
chr19	7183767	7184387	1.01909	0.6049	-0.752519	ENSMUST00000113383	-3549	Flrt1		chr19	7182337	7182962	1.64007	0.847703	-0.952125	ENSMUST00000113383	-2119	Flrt1
chrX	99277505	99278406	1.34091	0.864143	-0.633875	ENSMUST00000113628	4480	Nhsl2		chrX	99276213	99278620	6.81923	3.56035	-0.937589	ENSMUST00000113628	3188	Nhsl2
chr16	96578019	96579078	1.77001	0.518486	-1.77138	ENSMUST00000113794	-4197	Igsf5		chr16	96579022	96580112	3.19382	1.18678	-1.42822	ENSMUST00000113794	-3163	Igsf5
chr12	67570807	67572582	4.3982	2.33319	-0.914611	ENSMUST00000113942	0	Mdga2		chr12	67568220	67568724	0.949513	0.508622	-0.900594	ENSMUST00000113942	3322	Mdga2
chrX	45314157	45314630	0.750912	0.345657	-1.1193	ENSMUST00000115013	693	Ocrl		chrX	45311844	45312405	0.949513	0.169541	-2.48556	ENSMUST00000115013	-1061	Ocrl
chr16	33793119	33793893	1.34091	0.518486	-1.37084	ENSMUST00000115044	-230	Muc13		chr16	33792970	33793498	0.949513	0.508622	-0.900594	ENSMUST00000115044	-625	Muc13
chrX	22858918	22863215	15.6619	9.24633	-0.760304	ENSMUST00000115317	0	Klhl13		chrX	22859508	22860145	1.55375	0.169541	-3.19605	ENSMUST00000115317	1811	Klhl13
chr6	25636169	25636777	0.965458	0.518486	-0.896909	ENSMUST00000115332	3953	Gpr37		chr6	25635990	25637588	3.36646	1.69541	-0.989599	ENSMUST00000115332	3142	Gpr37
chr1	148571418	148572097	1.39455	0.691314	-1.01239	ENSMUST00000116191	-614	Gm15583		chr1	148571416	148572078	1.12215	0.169541	-2.72657	ENSMUST00000116191	-633	Gm15583
chr1	128367572	128368231	1.07273	0.6049	-0.82652	ENSMUST00000116695	-2772	AC164156.1		chr1	128366424	128367018	1.20847	0.508622	-1.24852	ENSMUST00000116695	-1624	AC164156.1
chr2	78866676	78867394	1.07273	0.259243	-2.04891	ENSMUST00000119028	-3249	Gm14466		chr2	78859826	78860493	1.55375	0.508622	-1.61109	ENSMUST00000119028	2936	Gm14466
chr10	6349898	6350984	1.39455	0.345657	-2.01239	ENSMUST00000119524	3187	Gm16074		chr10	6349419	6350328	1.81271	0.678163	-1.41844	ENSMUST00000119524	3843	Gm16074
chr1	61254455	61255463	1.50182	0.950557	-0.65987	ENSMUST00000120063	-370	Gm11591		chr1	61258877	61263247	15.2785	7.62933	-1.00188	ENSMUST00000120063	-4792	Gm11591
chr3	101040989	101041789	1.28728	0.6049	-1.08955	ENSMUST00000120257	3608	Gm12487		chr3	101040136	101040740	1.12215	0.339081	-1.72657	ENSMUST00000120257	2755	Gm12487
chr11	88251799	88252827	1.44819	0.691314	-1.06683	ENSMUST00000120278	-4784	Gm11510		chr11	88248677	88249183	1.03583	0.508622	-1.02613	ENSMUST00000120278	-1662	Gm11510
chr2	50375682	50376278	1.01909	0.259243	-1.97491	ENSMUST00000120419	1103	Gm13488		chr2	50375474	50376592	2.93486	1.18678	-1.30623	ENSMUST00000120419	789	Gm13488
chr9	40157284	40158102	1.6091	0.950557	-0.759405	ENSMUST00000121357	-3410	Gramd1b		chr9	40156474	40157152	1.20847	0.339081	-1.83348	ENSMUST00000121357	-2600	Gramd1b
chr7	119645651	119646243	0.858185	0.345657	-1.31195	ENSMUST00000123185	962	Parva		chr7	119645016	119645566	1.20847	0.339081	-1.83348	ENSMUST00000123185	327	Parva
chr10	72560968	72563171	5.52456	3.19733	-0.788994	ENSMUST00000123398	0	Pcdh15		chr10	72560468	72561283	1.38111	0.678163	-1.02613	ENSMUST00000123398	-807	Pcdh15
chr2	125042606	125043575	1.55546	0.777729	-1	ENSMUST00000123574	0	Gm14002		chr2	125038140	125038758	1.12215	0.508622	-1.1416	ENSMUST00000123574	4491	Gm14002
chr7	107783742	107784945	1.77001	0.6049	-1.54899	ENSMUST00000123960	882	Rab6		chr7	107782375	107782913	0.949513	0.339081	-1.48556	ENSMUST00000123960	0	Rab6
chr12	108193843	108195345	2.41364	1.29621	-0.896909	ENSMUST00000124395	0	Gm16087		chr12	108193575	108194213	1.38111	0.508622	-1.44116	ENSMUST00000124395	0	Gm16087
chrX	166428650	166436321	30.6265	10.7154	-1.5151	ENSMUST00000124513	-3780	Gm15247		chrX	166426717	166428356	3.28014	1.69541	-0.952125	ENSMUST00000124513	-1847	Gm15247
chr5	125052485	125053116	0.911821	0.259243	-1.81445	ENSMUST00000125191	3686	Tctn2		chr5	125052491	125052957	0.949513	0.169541	-2.48556	ENSMUST00000125191	3692	Tctn2
chr2	24492969	24493991	1.71637	0.864143	-0.990018	ENSMUST00000125798	0	Cacna1b		chr2	24492790	24494153	3.28014	1.35633	-1.27405	ENSMUST00000125798	0	Cacna1b
chr10	19589576	19590414	1.6091	0.777729	-1.04891	ENSMUST00000125942	-97	Pex7		chr10	19590408	19591196	1.38111	0.508622	-1.44116	ENSMUST00000125942	-929	Pex7
chr2	68201851	68204009	3.64728	2.07394	-0.814447	ENSMUST00000126663	568	Stk39		chr2	68202273	68202919	1.29479	0.339081	-1.93302	ENSMUST00000126663	1658	Stk39
chr2	84344041	84345515	3.70092	0.950557	-1.96104	ENSMUST00000126679	1516	Gm13710		chr2	84344224	84345503	7.85506	1.69541	-2.21199	ENSMUST00000126679	1528	Gm13710
chr19	57072787	57074228	2.41364	0.950557	-1.34437	ENSMUST00000126964	1309	Afap1l2		chr19	57078217	57079048	1.72639	0.847703	-1.02613	ENSMUST00000126964	-2682	Afap1l2
chrX	100678830	100680326	2.84274	1.72829	-0.717939	ENSMUST00000127786	-275	Xist		chrX	100678978	100680650	5.09284	2.71265	-0.908768	ENSMUST00000127786	-423	Xist
chr18	56933764	56934893	2.09183	0.691314	-1.59735	ENSMUST00000128240	4395	Gm15345		chr18	56933324	56935065	5.95604	2.37357	-1.32729	ENSMUST00000128240	3955	Gm15345
chr1	87487355	87488258	1.55546	0.864143	-0.847999	ENSMUST00000128339	-1590	Sp110		chr1	87487334	87488174	1.89903	0.339081	-2.48556	ENSMUST00000128339	-1569	Sp110
chr15	78600490	78602389	4.3982	2.33319	-0.914611	ENSMUST00000128389	0	Mfng		chr15	78600603	78602702	7.16451	2.88219	-1.3137	ENSMUST00000128389	0	Mfng
chr4	56237308	56238405	1.87728	0.864143	-1.1193	ENSMUST00000128591	0	2310081O03Rik		chr4	56237045	56238123	2.50326	1.18678	-1.07675	ENSMUST00000128591	0	2310081O03Rik
chr5	108977879	108979869	5.20274	3.37016	-0.626457	ENSMUST00000129040	0	Cplx1		chr5	108978104	108979791	5.26548	2.54311	-1.04997	ENSMUST00000129040	0	Cplx1
chr2	118536506	118537560	2.09183	1.2098	-0.789994	ENSMUST00000129153	0	Plcb2		chr2	118536649	118537226	1.29479	0.678163	-0.933016	ENSMUST00000129153	0	Plcb2
chr9	114820409	114821101	1.01909	0.6049	-0.752519	ENSMUST00000129305	-2216	Gpd1l		chr9	114822335	114822945	1.03583	0.169541	-2.61109	ENSMUST00000129305	-4142	Gpd1l
chr1	122981357	122982184	1.50182	0.864143	-0.797373	ENSMUST00000130015	-1798	B230209K01Rik		chr1	122979026	122979812	1.46743	0.678163	-1.11359	ENSMUST00000130015	-4170	B230209K01Rik
chr2	154844128	154846131	7.02639	0.0864143	-6.34537	ENSMUST00000130870	128	Gm14226		chr2	154844222	154846183	9.32249	0.169541	-5.78101	ENSMUST00000130870	222	Gm14226
chr5	115020971	115022260	3.3791	1.38263	-1.28923	ENSMUST00000130983	2947	BC057022		chr5	115019500	115020038	0.949513	0.169541	-2.48556	ENSMUST00000130983	1476	BC057022
chr6	83234610	83235534	1.50182	0.6049	-1.31195	ENSMUST00000131432	-2095	Slc4a5		chr6	83234906	83235409	0.949513	0.339081	-1.48556	ENSMUST00000131432	-2220	Slc4a5
chr2	24297468	24297966	0.750912	0.259243	-1.53434	ENSMUST00000131886	-389	Gm13415		chr2	24296911	24298354	3.45278	1.18678	-1.5407	ENSMUST00000131886	0	Gm13415
chr2	91121287	91122075	1.23364	0.6049	-1.02815	ENSMUST00000132092	1224	1110051M20Rik		chr2	91119221	91119787	1.03583	0.169541	-2.61109	ENSMUST00000132092	3512	1110051M20Rik
chr1	174479728	174481170	2.84274	0.950557	-1.58044	ENSMUST00000132370	0	4933439K11Rik		chr1	174480477	174481320	1.64007	0.678163	-1.27405	ENSMUST00000132370	0	4933439K11Rik
chr1	134281908	134282763	1.44819	0.950557	-0.607402	ENSMUST00000132435	4133	Tmcc2		chr1	134282569	134283141	1.12215	0.339081	-1.72657	ENSMUST00000132435	3755	Tmcc2
chr6	28081753	28082762	1.44819	0.777729	-0.896909	ENSMUST00000132755	368	Grm8		chr6	28081831	28082462	1.29479	0.508622	-1.34805	ENSMUST00000132755	668	Grm8
chr9	65935598	65936573	1.87728	1.2098	-0.633875	ENSMUST00000132841	2582	Snx1		chr9	65938237	65938852	1.20847	0.508622	-1.24852	ENSMUST00000132841	303	Snx1
chr7	139849539	139850378	1.28728	0.777729	-0.726984	ENSMUST00000132849	1190	Gm15582		chr7	139847839	139848718	3.36646	1.69541	-0.989599	ENSMUST00000132849	2850	Gm15582
chrX	50096937	50097694	1.07273	0.691314	-0.633875	ENSMUST00000133214	77	Kis2		chrX	50096956	50097435	0.949513	0.169541	-2.48556	ENSMUST00000133214	336	Kis2
chr11	80322116	80323156	1.66273	0.864143	-0.944215	ENSMUST00000133400	0	C030013C21Rik		chr11	80325282	80326470	2.6759	1.35633	-0.980322	ENSMUST00000133400	-2675	C030013C21Rik
chr6	90381306	90382634	2.41364	1.38263	-0.8038	ENSMUST00000134224	-2516	Ccdc37		chr6	90381550	90382270	1.38111	0.508622	-1.44116	ENSMUST00000134224	-2760	Ccdc37
chr13	94909960	94910975	1.82364	1.12339	-0.69897	ENSMUST00000134284	0	Gm15907		chr13	94913021	94913563	1.03583	0.169541	-2.61109	ENSMUST00000134284	-2950	Gm15907
chr6	33809047	33810186	2.36001	0.950557	-1.31195	ENSMUST00000134653	-1914	Exoc4		chr6	33812786	33813759	2.50326	0.847703	-1.56218	ENSMUST00000134653	688	Exoc4
chr11	120077526	120078469	1.55546	0.950557	-0.710496	ENSMUST00000135048	0	Gm11770		chr11	120077667	120079146	3.36646	1.52587	-1.1416	ENSMUST00000135048	0	Gm11770
chr17	13983848	13984525	1.07273	0.172829	-2.63387	ENSMUST00000137503	-3444	Mllt4		chr17	13987783	13988289	0.949513	0.169541	-2.48556	ENSMUST00000137503	0	Mllt4
chr7	116614718	116615542	1.77001	0.518486	-1.77138	ENSMUST00000137704	3107	Trim66		chr7	116622792	116623336	1.20847	0.169541	-2.83348	ENSMUST00000137704	-4145	Trim66
chr4	14445847	14446461	0.911821	0.0864143	-3.39941	ENSMUST00000138042	-2332	Slc26a7		chr4	14446691	14447424	1.38111	0.508622	-1.44116	ENSMUST00000138042	-3176	Slc26a7
chr16	17018253	17018819	0.911821	0.259243	-1.81445	ENSMUST00000138413	0	Mapk1		chr16	17021437	17022065	1.29479	0.169541	-2.93302	ENSMUST00000138413	2933	Mapk1
chr1	194976702	194978018	2.14546	1.38263	-0.633875	ENSMUST00000138826	-1288	Irf6		chr1	194976871	194977695	1.72639	0.678163	-1.34805	ENSMUST00000138826	-1611	Irf6
chr16	92101791	92102414	0.965458	0.518486	-0.896909	ENSMUST00000138961	-4092	Mrps6		chr16	92103933	92104671	1.29479	0.678163	-0.933016	ENSMUST00000138961	-1835	Mrps6
chr5	28536194	28537820	3.43274	0.691314	-2.31195	ENSMUST00000141196	0	Cnpy1		chr5	28535909	28539073	11.9121	2.37357	-2.32729	ENSMUST00000141196	0	Cnpy1
chr9	58303889	58304715	1.39455	0.864143	-0.690458	ENSMUST00000141912	911	4930461G14Rik		chr9	58302394	58303418	2.07167	0.678163	-1.61109	ENSMUST00000141912	0	4930461G14Rik
chr3	141130753	141131502	1.07273	0.6049	-0.82652	ENSMUST00000142762	2120	Unc5c		chr3	141129905	141130457	1.03583	0.508622	-1.02613	ENSMUST00000142762	1272	Unc5c
chr2	158670475	158671798	1.93092	0.691314	-1.48187	ENSMUST00000143195	-4567	Dhx35		chr2	158671130	158671748	1.29479	0.678163	-0.933016	ENSMUST00000143195	-4617	Dhx35
chr10	85953127	85955364	5.36365	3.45657	-0.633875	ENSMUST00000145864	0	Syn3		chr10	85953850	85955791	7.68243	3.89944	-0.978297	ENSMUST00000145864	0	Syn3
chr9	102618979	102626318	44.6256	28.2575	-0.659239	ENSMUST00000145913	0	Amotl2		chr9	102615235	102615914	1.20847	0.169541	-2.83348	ENSMUST00000145913	-3088	Amotl2
chr9	57959468	57960423	1.66273	0.950557	-0.806711	ENSMUST00000146741	1745	Ccdc33		chr9	57960685	57962152	4.66125	1.69541	-1.45908	ENSMUST00000146741	16	Ccdc33
chr6	92012270	92012937	1.12637	0.691314	-0.704264	ENSMUST00000146743	-4486	Fgd5		chr6	92013708	92014320	1.46743	0.508622	-1.52863	ENSMUST00000146743	-3103	Fgd5
chr1	10466766	10467709	1.71637	0.6049	-1.50459	ENSMUST00000147575	196	Cpa6		chr1	10466934	10468597	3.97069	1.86495	-1.09026	ENSMUST00000147575	0	Cpa6
chr17	87774918	87775478	0.911821	0.345657	-1.39941	ENSMUST00000148126	-2715	Ttc7		chr17	87780034	87780721	1.46743	0.678163	-1.11359	ENSMUST00000148126	1843	Ttc7
chr11	18911642	18921868	105.718	65.07	-0.700152	ENSMUST00000152073	0	Gm16141		chr11	18914169	18915327	2.2443	0.847703	-1.40464	ENSMUST00000152073	351	Gm16141
chr14	66962701	66964599	4.93456	1.64187	-1.58758	ENSMUST00000152093	0	Stmn4		chr14	66962772	66964155	4.83389	2.20403	-1.13304	ENSMUST00000152093	0	Stmn4
chr17	55584383	55587306	8.68912	3.6294	-1.25948	ENSMUST00000153220	0	St6gal2		chr17	55584184	55586986	10.9626	5.76438	-0.927347	ENSMUST00000153220	0	St6gal2
chr1	182928182	182929135	1.82364	1.03697	-0.814447	ENSMUST00000154133	-1882	Ephx1		chr1	182922094	182922733	1.38111	0.508622	-1.44116	ENSMUST00000154133	3569	Ephx1
chr2	150468153	150469916	6.70457	3.88864	-0.785878	ENSMUST00000154328	-4303	Acss1		chr2	150466385	150466936	1.12215	0.339081	-1.72657	ENSMUST00000154328	-2535	Acss1
chr2	120070359	120071542	2.84274	1.38263	-1.03987	ENSMUST00000155641	0	Gm13997		chr2	120070352	120071653	5.17916	2.37357	-1.12566	ENSMUST00000155641	0	Gm13997
chr4	6345670	6346286	0.911821	0.345657	-1.39941	ENSMUST00000156078	4850	Nsmaf		chr4	6352792	6353313	0.949513	0.339081	-1.48556	ENSMUST00000156078	-1658	Nsmaf
chr4	62890872	62891834	1.82364	1.03697	-0.814447	ENSMUST00000156519	-3486	Col27a1		chr4	62889606	62890404	1.55375	0.678163	-1.19605	ENSMUST00000156519	-4916	Col27a1
chrX	163058876	163060552	2.52092	1.64187	-0.618608	ENSMUST00000156526	0	Gm15226		chrX	163064197	163064860	1.38111	0.339081	-2.02613	ENSMUST00000156526	-4724	Gm15226
chr11	5735682	5736488	1.18	0.6049	-0.964023	ENSMUST00000156913	0	Polm		chr11	5736192	5736629	1.03583	0.508622	-1.02613	ENSMUST00000156913	0	Polm
chr13	21988386	21989896	3.75456	1.12339	-1.74079	ENSMUST00000157523	0	Mir1983		chr13	21988277	21988778	1.03583	0.339081	-1.61109	ENSMUST00000157523	141	Mir1983
chr12	16761202	16762121	1.34091	0.432071	-1.63387	ENSMUST00000159120	1881	Greb1		chr12	16766592	16767613	2.58958	0.169541	-3.93302	ENSMUST00000159120	-2592	Greb1
chr18	74173445	74175622	4.13001	2.67884	-0.624537	ENSMUST00000159260	-1939	D730045A05Rik		chr18	74175500	74175930	0.949513	0.169541	-2.48556	ENSMUST00000159260	-1631	D730045A05Rik
chr3	101999122	101999624	0.750912	0.345657	-1.1193	ENSMUST00000159586	2205	Vangl1		chr3	101997597	101998312	1.55375	0.339081	-2.19605	ENSMUST00000159586	3517	Vangl1
chr6	140579290	140579963	1.01909	0.518486	-0.974911	ENSMUST00000161335	3889	Aebp2		chr6	140575442	140576123	1.55375	0.678163	-1.19605	ENSMUST00000161335	41	Aebp2
chr5	15185372	15187134	2.57455	1.38263	-0.896909	ENSMUST00000162113	0	Speer7-ps1		chr5	15185626	15186091	1.12215	0.339081	-1.72657	ENSMUST00000162113	-437	Speer7-ps1
chr1	191509360	191514791	23.4392	14.7768	-0.665583	ENSMUST00000165663	0	Cenpf		chr1	191511262	191512017	1.98535	0.508622	-1.96472	ENSMUST00000165663	0	Cenpf
chr16	26527257	26528535	2.73546	1.29621	-1.07748	ENSMUST00000165687	-401	Tmem207		chr16	26527323	26529569	8.0277	2.71265	-1.56528	ENSMUST00000165687	-467	Tmem207
chr19	44592753	44593386	1.18	0.259243	-2.18642	ENSMUST00000165758	1698	Sec31b		chr19	44589928	44590514	1.55375	0.508622	-1.61109	ENSMUST00000165758	4570	Sec31b
chr3	86349572	86351181	3.3791	1.64187	-1.0413	ENSMUST00000166434	-957	Lrba		chr3	86351865	86352423	1.03583	0.169541	-2.61109	ENSMUST00000166434	0	Lrba
chr6	82351947	82353620	3.3791	1.46904	-1.20176	ENSMUST00000166470	0	Tacr1		chr6	82351943	82353672	3.5391	1.52587	-1.21375	ENSMUST00000166470	0	Tacr1
chr6	137363176	137364074	1.55546	0.864143	-0.847999	ENSMUST00000167002	3936	Ptpro		chr6	137362030	137362970	1.89903	0.508622	-1.90059	ENSMUST00000167002	2790	Ptpro
chr17	8018122	8019015	1.34091	0.691314	-0.955803	ENSMUST00000167580	1153	Fndc1		chr17	8017780	8018643	1.98535	1.01724	-0.964725	ENSMUST00000167580	1525	Fndc1
chr6	101324273	101325356	1.77001	0.864143	-1.03441	ENSMUST00000168467	1981	Pdzrn3		chr6	101326721	101327329	1.46743	0.678163	-1.11359	ENSMUST00000168467	8	Pdzrn3
chr17	3527403	3528305	1.39455	0.864143	-0.690458	ENSMUST00000168560	-4249	Cldn20		chr17	3526715	3527628	1.98535	0.508622	-1.96472	ENSMUST00000168560	-4926	Cldn20
chr17	29660211	29661688	4.82729	1.12339	-2.10336	ENSMUST00000168877	-3477	Gm17657		chr17	29659850	29661355	7.42347	2.20403	-1.75195	ENSMUST00000168877	-3116	Gm17657
chr14	24411854	24412491	1.12637	0.691314	-0.704264	ENSMUST00000172099	-932	Kcnma1		chr14	24411979	24412667	1.29479	0.678163	-0.933016	ENSMUST00000172099	-1057	Kcnma1
chr9	79677123	79679090	6.11457	3.80223	-0.685405	ENSMUST00000172740	0	Filip1		chr9	79677057	79679380	11.9984	4.74714	-1.33771	ENSMUST00000172740	0	Filip1
chr16	50783984	50785354	1.98455	1.29621	-0.614509	ENSMUST00000174511	395	RP23-76I20.1		chr16	50783968	50784915	2.58958	1.18678	-1.12566	ENSMUST00000174511	379	RP23-76I20.1

## Sheet: D-AcH3 depleted - RNAseq
ChIP-seq									RNA-seq cortex									RNA-seq cortex
chr	start	end	WT	KO	lfc	NearestTSS	DistnaceToTSS	GeneName		baseMean	log2FoldChange	lfcSE	stat	pvalue	padj	symbol	biotype		baseMean	log2FoldChange	lfcSE	stat	pvalue	padj	symbol	biotype
chr3	90299214	90299909	1.12637	0.6049	-0.896909	ENSMUST00000149884	-4260	Snapin	ENSMUSG00000001018	2020.52	0.395153	0.0771709	4.99338	5.93307e-07	1.05099e-05	Snapin	protein_coding	ENSMUSG00000001018	2336.3	0.341278	0.0606098	5.469	4.52584e-08	1.55668e-06	Snapin	protein_coding
chrX	45314157	45314630	0.750912	0.345657	-1.1193	ENSMUST00000115013	693	Ocrl	ENSMUSG00000001173	3992.96	0.236047	0.067742	3.4619	0.000536382	0.00367991	Ocrl	protein_coding	ENSMUSG00000001173	5472.07	0.284613	0.0691386	3.96007	7.49265e-05	0.000829049	Ocrl	protein_coding
chr17	56456384	56456783	0.697275	0.259243	-1.42742	ENSMUST00000139654	-666	Uhrf1	ENSMUSG00000001228	137.956	-0.449783	0.140679	-3.17289	0.00150931	0.00861597	Uhrf1	protein_coding	ENSMUSG00000001228	181.469	-0.526317	0.136263	-3.37913	0.000727156	0.00528267	Uhrf1	protein_coding
chr15	102072978	102073584	0.965458	0.432071	-1.15994	ENSMUST00000130204	437	Rarg	ENSMUSG00000001288	313.954	-0.456397	0.110224	-4.01772	5.87642e-05	0.00057331	Rarg	protein_coding	ENSMUSG00000001288	311.95	-0.372142	0.121939	-2.71238	0.00668025	0.0310776	Rarg	protein_coding
chr2	164594768	164597342	14.4282	9.24633	-0.641942	ENSMUST00000001439	0	Ube2c	ENSMUSG00000001403	106.809	-0.704953	0.145931	-4.70184	2.57821e-06	3.83172e-05	Ube2c	protein_coding	ENSMUSG00000001403	147.759	-0.651327	0.152158	-4.00899	6.09803e-05	0.000698244	Ube2c	protein_coding
chr3	88125823	88126389	0.804548	0.518486	-0.633875	ENSMUST00000168971	855	Cct3	ENSMUSG00000001416	4251.37	-0.29218	0.0579942	-5.01546	5.29056e-07	9.56907e-06	Cct3	protein_coding	ENSMUSG00000001416	4798.62	-0.325644	0.0554943	-5.71789	1.07852e-08	4.60133e-07	Cct3	protein_coding
chr6	28830676	28831656	1.82364	0.777729	-1.22948	ENSMUST00000165151	635	Snd1	ENSMUSG00000001424	3272.38	0.200414	0.0771664	2.66845	0.00762012	0.0321635	Snd1	protein_coding	ENSMUSG00000001424	2898.95	0.256256	0.0822041	3.18339	0.00145561	0.00930625	Snd1	protein_coding
chr6	113272978	113273456	0.804548	0.259243	-1.63387	ENSMUST00000131594	2445	Brpf1	ENSMUSG00000001632	1494.38	0.229031	0.066812	3.3868	0.000707124	0.0046327	Brpf1	protein_coding	ENSMUSG00000001632	1391.25	0.200231	0.0722121	2.64772	0.00810367	0.0362277	Brpf1	protein_coding
chr2	31848566	31849137	0.911821	0.345657	-1.39941	ENSMUST00000153096	-1204	Nup214	ENSMUSG00000001855	1577.45	0.287366	0.0907626	3.1772	0.00148704	0.00850939	Nup214	protein_coding	ENSMUSG00000001855	1728.46	0.378731	0.0883368	4.11262	3.91186e-05	0.000484492	Nup214	protein_coding
chr7	28034410	28035628	1.6091	0.950557	-0.759405	ENSMUST00000123012	0	Adck4	ENSMUSG00000003762	734.171	0.241177	0.0870268	2.75539	0.0058623	0.026096	Coq8b	protein_coding	ENSMUSG00000003762	928.434	0.361155	0.0861463	3.98477	6.75444e-05	0.000757761	Coq8b	protein_coding
chr11	90247374	90248181	1.12637	0.432071	-1.38234	ENSMUST00000107881	1341	Hlf	ENSMUSG00000003949	4817.22	0.382378	0.0869697	4.39699	1.09761e-05	0.000134451	Hlf	protein_coding	ENSMUSG00000003949	3979.07	0.452131	0.0982542	4.45588	8.3549e-06	0.000134672	Hlf	protein_coding
chr2	24492969	24493991	1.71637	0.864143	-0.990018	ENSMUST00000125798	0	Cacna1b	ENSMUSG00000004113	7269.93	-0.396622	0.0799139	-4.82161	1.42404e-06	2.27138e-05	Cacna1b	protein_coding	ENSMUSG00000004113	6713.79	-0.247173	0.0729768	-3.1532	0.00161493	0.0100783	Cacna1b	protein_coding
chr10	28936213	28938193	2.95001	1.29621	-1.18642	ENSMUST00000092627	4766	9330159F19Rik	ENSMUSG00000004360	3960.73	-0.247701	0.0586434	-4.07345	4.63217e-05	0.00046447	9330159F19Rik	protein_coding	ENSMUSG00000004360	3795.63	-0.346618	0.056618	-5.85749	4.69902e-09	2.29116e-07	9330159F19Rik	protein_coding
chr17	28745456	28746188	1.18	0.432071	-1.44945	ENSMUST00000004987	-1343	Srpk1	ENSMUSG00000004865	4939.12	-0.246889	0.0517266	-4.69709	2.63898e-06	3.90903e-05	Srpk1	protein_coding	ENSMUSG00000004865	4102.52	-0.205649	0.0739453	-2.69218	0.0070987	0.0326139	Srpk1	protein_coding
chr11	69326768	69327912	2.68183	1.72829	-0.633875	ENSMUST00000154985	2346	Dnahc2	ENSMUSG00000005237	461.617	0.438773	0.0987406	4.25201	2.11856e-05	0.000238209	Dnah2	protein_coding	ENSMUSG00000005237	704.685	0.43539	0.106882	3.68362	0.000229944	0.00208323	Dnah2	protein_coding
chr18	34402837	34403719	1.39455	0.691314	-1.01239	ENSMUST00000170195	-3629	Apc	ENSMUSG00000005871	63528.7	-0.338303	0.0739035	-4.62276	3.78668e-06	5.31739e-05	Apc	protein_coding	ENSMUSG00000005871	43420.1	-0.659467	0.0849361	-7.39997	1.3621e-13	1.84539e-11	Apc	protein_coding
chr7	16712433	16713249	1.23364	0.259243	-2.25055	ENSMUST00000129080	1682	Kptn	ENSMUSG00000006021	1227.26	0.341118	0.0908383	3.3899	0.000699171	0.00458855	Kptn	protein_coding	ENSMUSG00000006021	1190.14	0.404238	0.0968455	3.74836	0.000177996	0.00167768	Kptn	protein_coding
chr11	45700396	45701192	1.39455	0.864143	-0.690458	ENSMUST00000133715	4499	Clint1	ENSMUSG00000006169	2398.12	0.227	0.0629225	3.6288	0.000284744	0.00217893	Clint1	protein_coding	ENSMUSG00000006169	2765.47	0.251741	0.0801268	3.14539	0.00165864	0.0102892	Clint1	protein_coding
chr14	31678689	31679478	1.39455	0.6049	-1.20503	ENSMUST00000164184	-153	Tmem110	ENSMUSG00000006526	945.247	0.221545	0.0794664	2.71314	0.00666499	0.0288801	Tmem110	protein_coding	ENSMUSG00000006526	1003.21	0.206548	0.0717871	2.80062	0.00510049	0.0251384	Tmem110	protein_coding
chr11	100212909	100213987	1.93092	1.2098	-0.674516	ENSMUST00000174635	0	Hap1	ENSMUSG00000006930	6421.33	0.56619	0.182133	3.18738	0.00143569	0.00827566	Hap1	protein_coding	ENSMUSG00000006930	28176.7	0.465912	0.0892873	5.16755	2.37177e-07	6.67102e-06	Hap1	protein_coding
chr17	35238267	35238995	1.07273	0.518486	-1.04891	ENSMUST00000173247	470	Abhd16a	ENSMUSG00000007036	2486.88	0.347601	0.0627585	5.41587	6.09929e-08	1.39906e-06	Abhd16a	protein_coding	ENSMUSG00000007036	2542.93	0.400616	0.0661599	5.83599	5.34706e-09	2.53743e-07	Abhd16a	protein_coding
chr11	22896804	22898020	2.09183	0.950557	-1.13792	ENSMUST00000174746	1182	Cct4	ENSMUSG00000007739	3806.54	-0.260087	0.0564735	-4.5854	4.53113e-06	6.2331e-05	Cct4	protein_coding	ENSMUSG00000007739	4435.74	-0.27549	0.0730267	-3.59664	0.000322355	0.00273347	Cct4	protein_coding
chr2	73160761	73161447	1.01909	0.259243	-1.97491	ENSMUST00000123621	3306	Scrn3	ENSMUSG00000008226	1069.82	0.489208	0.0811711	5.85922	4.65037e-09	1.41998e-07	Scrn3	protein_coding	ENSMUSG00000008226	1259.57	0.409036	0.084936	4.58611	4.51591e-06	7.99884e-05	Scrn3	protein_coding
chr5	3584588	3585215	1.07273	0.345657	-1.63387	ENSMUST00000156973	4092	1700109H08Rik	ENSMUSG00000008307	283.159	0.56369	0.107515	5.03408	4.80149e-07	8.8043e-06	1700109H08Rik	protein_coding	ENSMUSG00000008307	302.753	0.432561	0.113036	3.47972	0.000501933	0.00391058	1700109H08Rik	protein_coding
chr3	103597295	103598257	1.39455	0.777729	-0.842461	ENSMUST00000118317	-1810	Hipk1	ENSMUSG00000008730	4625.8	0.194071	0.0601196	3.21031	0.00132593	0.00774455	Hipk1	protein_coding	ENSMUSG00000008730	5486.88	0.249709	0.0671144	3.69783	0.000217447	0.00198828	Hipk1	protein_coding
chr7	30598100	30598873	1.01909	0.172829	-2.55987	ENSMUST00000032796	-2218	Zfp790	ENSMUSG00000011427	684.621	-0.193219	0.0771994	-2.48223	0.0130563	0.0488088	Zfp790	protein_coding	ENSMUSG00000011427	729.001	-0.241818	0.0814684	-2.7387	0.00616823	0.0292554	Zfp790	protein_coding
chr15	98373220	98374273	1.71637	0.777729	-1.14202	ENSMUST00000163180	0	Ccnt1	ENSMUSG00000011960	2526.67	0.144129	0.0564379	2.53634	0.0112019	0.0434579	Ccnt1	protein_coding	ENSMUSG00000011960	2540.43	0.148647	0.0579858	2.52333	0.0116251	0.0477596	Ccnt1	protein_coding
chr16	18324021	18324583	0.858185	0.345657	-1.31195	ENSMUST00000150152	0	D16H22S680E	ENSMUSG00000013539	2130.67	-0.259212	0.066508	-3.84241	0.00012183	0.00106706	Tango2	protein_coding	ENSMUSG00000013539	2333.87	-0.387448	0.0672753	-5.61746	1.93783e-08	7.7287e-07	Tango2	protein_coding
chr10	79369837	79370320	0.804548	0.432071	-0.896909	ENSMUST00000166964	747	Med16	ENSMUSG00000013833	1868.83	0.422291	0.0736291	5.59929	2.15233e-08	5.58807e-07	Med16	protein_coding	ENSMUSG00000013833	1886.28	0.603524	0.0794518	7.24147	4.43843e-13	5.35873e-11	Med16	protein_coding
chr8	125025393	125025999	1.01909	0.6049	-0.752519	ENSMUST00000156333	-1608	Fam38a	ENSMUSG00000014444	876.099	-0.545628	0.083975	-6.28983	3.17805e-10	1.22589e-08	Piezo1	protein_coding	ENSMUSG00000014444	554.87	-0.381844	0.122173	-2.65444	0.00794398	0.0356756	Piezo1	protein_coding
chr6	83440170	83441349	1.82364	0.432071	-2.07748	ENSMUST00000153415	-3167	Dguok	ENSMUSG00000014554	628.062	0.492244	0.0817051	5.91839	3.25116e-09	1.03977e-07	Dguok	protein_coding	ENSMUSG00000014554	731.127	0.378647	0.0800812	4.57592	4.74125e-06	8.33146e-05	Dguok	protein_coding
chrX	68808342	68811295	11.21	4.92561	-1.18642	ENSMUST00000123100	0	Hmgb3	ENSMUSG00000015217	478.372	-0.488123	0.091055	-5.29591	1.18428e-07	2.51224e-06	Hmgb3	protein_coding	ENSMUSG00000015217	537.819	-0.487095	0.102694	-4.5826	4.59234e-06	8.11802e-05	Hmgb3	protein_coding
chr1	66411631	66412461	1.23364	0.777729	-0.665583	ENSMUST00000114012	401	Mtap2	ENSMUSG00000015222	60711.8	-0.338781	0.0631847	-5.30577	1.12198e-07	2.38812e-06	Map2	protein_coding	ENSMUSG00000015222	64849.8	-0.224072	0.0598048	-3.54314	0.000395394	0.00323833	Map2	protein_coding
chrX	71555682	71556273	0.858185	0.432071	-0.990018	ENSMUST00000135041	0	Gdi1	ENSMUSG00000015291	21285.2	-0.376366	0.0655862	-5.601	2.13113e-08	5.54063e-07	Gdi1	protein_coding	ENSMUSG00000015291	21742.5	-0.244105	0.0590501	-3.91741	8.95052e-05	0.000955799	Gdi1	protein_coding
chr3	95856861	95857565	1.12637	0.518486	-1.1193	ENSMUST00000140518	4078	Vps45	ENSMUSG00000015747	1670.56	0.268895	0.0686905	3.83784	0.00012412	0.0010846	Vps45	protein_coding	ENSMUSG00000015747	1576.85	0.192976	0.0716604	2.56855	0.0102126	0.0432998	Vps45	protein_coding
chr5	46069623	46070253	1.07273	0.172829	-2.63387	ENSMUST00000129562	522	Ncapg	ENSMUSG00000015880	98.8146	-0.601746	0.148505	-3.85914	0.000113789	0.00100831	Ncapg	protein_coding	ENSMUSG00000015880	129.145	-0.854151	0.143677	-5.81194	6.1754e-09	2.82477e-07	Ncapg	protein_coding
chr2	143737214	143737729	0.750912	0.0864143	-3.1193	ENSMUST00000103172	-3327	Dstn	ENSMUSG00000015932	7335.78	-0.238767	0.0578565	-4.09176	4.2811e-05	0.000432944	Dstn	protein_coding	ENSMUSG00000015932	6978.15	-0.203315	0.0664458	-2.94889	0.00318917	0.0172882	Dstn	protein_coding
chr11	101632768	101634692	3.16456	1.46904	-1.10713	ENSMUST00000132040	0	Etv4	ENSMUSG00000017724	668.101	-0.283657	0.0812659	-3.3398	0.000838373	0.00532462	Etv4	protein_coding	ENSMUSG00000017724	874.981	-0.561943	0.0882496	-5.96801	2.40164e-09	1.23908e-07	Etv4	protein_coding
chr11	104297755	104298523	1.23364	0.345657	-1.83551	ENSMUST00000106971	4494	1700081L11Rik	ENSMUSG00000018412	4376.88	0.176306	0.057641	3.02953	0.00244937	0.0128527	Kansl1	protein_coding	ENSMUSG00000018412	4166.51	0.211389	0.0600976	3.433	0.000596932	0.00448627	Kansl1	protein_coding
chr11	87003032	87003908	1.18	0.432071	-1.44945	ENSMUST00000154138	0	Trim37	ENSMUSG00000018548	15943.9	-0.26031	0.0580096	-4.47297	7.71396e-06	9.97274e-05	Trim37	protein_coding	ENSMUSG00000018548	13601.1	-0.316998	0.0557223	-5.53454	3.12038e-08	1.15617e-06	Trim37	protein_coding
chr7	17501683	17502224	0.911821	0.518486	-0.814447	ENSMUST00000172594	291	Calm3	ENSMUSG00000019370	68116.8	-0.478602	0.07166	-6.5739	4.90149e-11	2.27066e-09	Calm3	protein_coding	ENSMUSG00000019370	56253.7	-0.541429	0.0551838	-9.60663	7.4959e-22	5.32149e-19	Calm3	protein_coding
chr10	57867307	57868299	1.39455	0.777729	-0.842461	ENSMUST00000124312	-2506	Lims1	ENSMUSG00000019920	1934.82	-0.21377	0.0687218	-3.10093	0.00192914	0.0105536	Lims1	protein_coding	ENSMUSG00000019920	2309.45	-0.323137	0.0679554	-4.56321	5.03776e-06	8.72295e-05	Lims1	protein_coding
chr10	19589576	19590414	1.6091	0.777729	-1.04891	ENSMUST00000125942	-97	Pex7	ENSMUSG00000020003	1674.69	0.57862	0.0649788	8.72111	2.75488e-18	4.23333e-16	Pex7	protein_coding	ENSMUSG00000020003	2178.43	0.497887	0.0648079	7.32268	2.43062e-13	3.15973e-11	Pex7	protein_coding
chr11	43233520	43234146	1.01909	0.345657	-1.55987	ENSMUST00000140434	2343	Pttg1	ENSMUSG00000020415	207.779	-1.86074	0.126492	-14.0337	9.69476e-45	2.61772e-41	Pttg1	protein_coding	ENSMUSG00000020415	229.379	-0.821803	0.211175	-3.60613	0.000310794	0.00265234	Pttg1	protein_coding
chr11	3674110	3675124	1.71637	1.12339	-0.611507	ENSMUST00000155197	0	Osbp2	ENSMUSG00000020435	3842.26	-0.272589	0.0678986	-3.87772	0.000105438	0.00094539	Osbp2	protein_coding	ENSMUSG00000020435	2284.25	-0.215561	0.0796059	-2.51255	0.0119861	0.0487416	Osbp2	protein_coding
chr11	84696750	84697302	0.804548	0.345657	-1.21884	ENSMUST00000141173	664	Myo19	ENSMUSG00000020527	730.089	-0.340258	0.0798388	-4.04748	5.17722e-05	0.000511525	Myo19	protein_coding	ENSMUSG00000020527	855.153	-0.388697	0.0885176	-4.29259	1.76597e-05	0.000249343	Myo19	protein_coding
chr12	4085042	4085551	0.911821	0.345657	-1.39941	ENSMUST00000049584	2415	Dnajc27	ENSMUSG00000020657	5566	0.38461	0.0534042	7.0901	1.34018e-12	8.47183e-11	Dnajc27	protein_coding	ENSMUSG00000020657	8203.12	0.439574	0.0635551	6.79936	1.05088e-11	9.92078e-10	Dnajc27	protein_coding
chr11	115349655	115350351	1.07273	0.432071	-1.31195	ENSMUST00000125940	2166	Nt5c	ENSMUSG00000020736	1338.51	-0.217104	0.0701641	-3.16532	0.00154912	0.00879808	Nt5c	protein_coding	ENSMUSG00000020736	1390.32	-0.359049	0.0795717	-4.40663	1.04993e-05	0.000161895	Nt5c	protein_coding
chr11	116069093	116069764	0.965458	0.345657	-1.48187	ENSMUST00000135460	-2484	2310004N24Rik	ENSMUSG00000020778	683.144	0.420322	0.0846977	4.73489	2.19172e-06	3.32737e-05	Ten1	protein_coding	ENSMUSG00000020778	694.82	0.395693	0.0908154	4.00114	6.30381e-05	0.000719023	Ten1	protein_coding
chr11	98867725	98869067	2.14546	1.38263	-0.633875	ENSMUST00000144318	0	Top2a	ENSMUSG00000020914	670.172	-0.85522	0.0855847	-9.77001	1.51443e-22	3.86815e-20	Top2a	protein_coding	ENSMUSG00000020914	847.403	-0.789846	0.109865	-6.4384	1.2074e-10	8.50352e-09	Top2a	protein_coding
chr11	102730094	102731164	1.39455	0.6049	-1.20503	ENSMUST00000173974	-2812	Eftud2	ENSMUSG00000020929	3782.31	0.236948	0.0685243	3.48879	0.000485205	0.00338533	Eftud2	protein_coding	ENSMUSG00000020929	3317.39	0.27334	0.0662897	4.09378	4.24394e-05	0.000518029	Eftud2	protein_coding
chr12	53110216	53112112	9.81549	5.78976	-0.761557	ENSMUST00000021339	-2729	6530401N04Rik	ENSMUSG00000020956	415.244	0.364553	0.0959113	3.55116	0.000383538	0.00280389	Dtd2	protein_coding	ENSMUSG00000020956	491.289	0.25583	0.0893666	2.63251	0.00847555	0.0374687	Dtd2	protein_coding
chr12	60108972	60109722	1.23364	0.691314	-0.835508	ENSMUST00000165134	-751	Sec23a	ENSMUSG00000020986	6198.36	-0.247458	0.0552618	-4.465	8.00703e-06	0.000102953	Sec23a	protein_coding	ENSMUSG00000020986	5743.52	-0.317462	0.0575392	-5.324	1.01509e-07	3.12234e-06	Sec23a	protein_coding
chr13	19044438	19045810	2.46728	1.29621	-0.928618	ENSMUST00000003345	4200	Amph	ENSMUSG00000021314	10600.6	-0.202494	0.0732584	-2.69185	0.0071056	0.0303509	Amph	protein_coding	ENSMUSG00000021314	8314.5	-0.222145	0.075051	-2.71969	0.00653422	0.0305424	Amph	protein_coding
chr13	107771720	107772775	1.71637	0.777729	-1.14202	ENSMUST00000162845	-4523	Kif2a	ENSMUSG00000021693	6401.3	-0.289234	0.056988	-5.00249	5.6596e-07	1.00727e-05	Kif2a	protein_coding	ENSMUSG00000021693	5996.01	-0.212419	0.055289	-3.69214	0.000222373	0.00202602	Kif2a	protein_coding
chr13	110367520	110368249	1.07273	0.691314	-0.633875	ENSMUST00000079975	-3350	Pde4d	ENSMUSG00000021699	2473.15	-0.207613	0.0581647	-3.59092	0.000329511	0.00245864	Pde4d	protein_coding	ENSMUSG00000021699	2262.22	-0.188772	0.0719908	-2.53958	0.0110987	0.0461365	Pde4d	protein_coding
chr14	51711427	51712718	2.03819	1.29621	-0.652983	ENSMUST00000022428	677	Rnase4	ENSMUSG00000021876	658.495	-0.403417	0.11243	-3.59079	0.000329674	0.00245864	Rnase4	protein_coding	ENSMUSG00000021876	681.464	-0.353186	0.122334	-2.72144	0.00649976	0.0303973	Rnase4	protein_coding
chr14	66962701	66964599	4.93456	1.64187	-1.58758	ENSMUST00000152093	0	Stmn4	ENSMUSG00000022044	11129.4	-0.839105	0.087124	-9.50524	1.99597e-21	4.49116e-19	Stmn4	protein_coding	ENSMUSG00000022044	8596.72	-0.837399	0.0602001	-13.5	1.56478e-41	1.38858e-37	Stmn4	protein_coding
chr14	70948509	70949378	1.71637	0.691314	-1.31195	ENSMUST00000159959	-2641	Hr	ENSMUSG00000022096	2167.3	-0.256766	0.0844639	-2.99614	0.00273424	0.0140702	Hr	protein_coding	ENSMUSG00000022096	881.386	-0.349373	0.123159	-2.67781	0.00741049	0.0337928	Hr	protein_coding
chr14	52913456	52914333	1.28728	0.777729	-0.726984	ENSMUST00000173546	2012	Mettl3	ENSMUSG00000022160	939.191	-0.185852	0.0715583	-2.54022	0.0110784	0.0430758	Mettl3	protein_coding	ENSMUSG00000022160	1025.51	-0.241227	0.0835524	-2.81026	0.0049502	0.0245614	Mettl3	protein_coding
chr14	56106587	56107749	1.6091	0.172829	-3.21884	ENSMUST00000076236	-2181	Lrrc16b	ENSMUSG00000022211	4111.59	-0.562661	0.0857544	-6.43239	1.25613e-10	5.20661e-09	Carmil3	protein_coding	ENSMUSG00000022211	6984.67	-0.402865	0.0710218	-5.43311	5.53801e-08	1.85101e-06	Carmil3	protein_coding
chr15	85403316	85404551	2.62819	1.46904	-0.839193	ENSMUST00000109424	3950	Wnt7b	ENSMUSG00000022382	1456.94	-0.220465	0.0834355	-2.5301	0.0114031	0.0440485	Wnt7b	protein_coding	ENSMUSG00000022382	985.679	-0.511313	0.100766	-4.6334	3.59707e-06	6.59513e-05	Wnt7b	protein_coding
chr15	79260975	79261602	0.911821	0.518486	-0.814447	ENSMUST00000136003	-679	Csnk1e	ENSMUSG00000022433	5091.69	-0.263267	0.0558696	-4.65909	3.17609e-06	4.57555e-05	Csnk1e	protein_coding	ENSMUSG00000022433	4350.51	-0.197541	0.0599346	-3.20946	0.00132987	0.00863293	Csnk1e	protein_coding
chr16	4522207	4523125	1.50182	0.777729	-0.949376	ENSMUST00000132284	0	Srl	ENSMUSG00000022519	876.271	-0.38425	0.0770754	-4.94352	7.67262e-07	1.31717e-05	Srl	protein_coding	ENSMUSG00000022519	537.957	-0.285669	0.103293	-2.7148	0.00663163	0.0308919	Srl	protein_coding
chr15	76136991	76138488	3.21819	2.07394	-0.633875	ENSMUST00000171340	0	Oplah	ENSMUSG00000022562	537.257	0.345811	0.0923946	3.64566	0.00026671	0.00206348	Oplah	protein_coding	ENSMUSG00000022562	585.979	0.300285	0.0966544	2.7549	0.00587097	0.0280877	Oplah	protein_coding
chr16	43237884	43238515	0.858185	0.432071	-0.990018	ENSMUST00000134537	1734	Zbtb20	ENSMUSG00000022708	6288.22	0.248887	0.0867177	3.05157	0.0022765	0.0121275	Zbtb20	protein_coding	ENSMUSG00000022708	6815.22	-0.399895	0.116647	-3.24391	0.00117901	0.00784004	Zbtb20	protein_coding
chr16	17336235	17336987	0.965458	0.6049	-0.674516	ENSMUST00000161034	4761	Serpind1	ENSMUSG00000022766	98.2868	0.435282	0.156528	2.6658	0.00768049	0.0323029	Serpind1	protein_coding	ENSMUSG00000022766	174.824	0.606302	0.146326	4.24701	2.16647e-05	0.000294009	Serpind1	protein_coding
chr16	32622993	32623872	1.6091	0.864143	-0.896909	ENSMUST00000128285	-656	Tfrc	ENSMUSG00000022797	6335.26	-0.486385	0.0687267	-7.00133	2.53536e-12	1.5117e-10	Tfrc	protein_coding	ENSMUSG00000022797	7018.61	-0.499772	0.0763319	-6.26303	3.77575e-10	2.42226e-08	Tfrc	protein_coding
chr17	13151509	13152645	2.25273	1.2098	-0.896909	ENSMUST00000159697	593	Acat2	ENSMUSG00000023832	1539.55	-0.268064	0.0668199	-3.93307	8.38692e-05	0.000775544	Acat2	protein_coding	ENSMUSG00000023832	1603.93	-0.347688	0.0808267	-3.96749	7.26329e-05	0.000806184	Acat2	protein_coding
chr17	55584383	55587306	8.68912	3.6294	-1.25948	ENSMUST00000153220	0	St6gal2	ENSMUSG00000024172	4357.13	-0.166041	0.060075	-2.74642	0.00602502	0.026657	St6gal2	protein_coding	ENSMUSG00000024172	2852.91	-0.437349	0.0884026	-4.75782	1.95694e-06	4.00137e-05	St6gal2	protein_coding
chr18	31606286	31607514	2.03819	1.29621	-0.652983	ENSMUST00000025110	0	Syt4	ENSMUSG00000024261	9505.8	-0.403631	0.0696981	-5.76551	8.14104e-09	2.34564e-07	Syt4	protein_coding	ENSMUSG00000024261	7390.15	-0.387495	0.0610708	-6.00172	1.95235e-09	1.03126e-07	Syt4	protein_coding
chr17	36392601	36393412	1.34091	0.691314	-0.955803	ENSMUST00000173122	0	Rpp21	ENSMUSG00000024446	373.292	-0.364703	0.0975325	-3.66669	0.000245708	0.00192863	Rpp21	protein_coding	ENSMUSG00000024446	424.856	-0.321571	0.0964775	-3.18468	0.00144912	0.00926996	Rpp21	protein_coding
chr18	43216462	43220325	10.2982	5.78976	-0.83082	ENSMUST00000025377	0	Ppp2r2b	ENSMUSG00000024500	7728.66	-0.288382	0.0620817	-4.63412	3.58455e-06	5.07503e-05	Ppp2r2b	protein_coding	ENSMUSG00000024500	6134.94	-0.376177	0.0619188	-5.83048	5.52665e-09	2.5949e-07	Ppp2r2b	protein_coding
chr18	43549111	43554595	26.2819	16.3323	-0.686342	ENSMUST00000025379	0	Dpysl3	ENSMUSG00000024501	24310.3	-1.08031	0.177087	-6.01334	1.81734e-09	6.11202e-08	Dpysl3	protein_coding	ENSMUSG00000024501	16149.7	-1.18934	0.0867885	-12.8528	8.29332e-38	4.90633e-34	Dpysl3	protein_coding
chr19	12646929	12649469	7.50912	4.75279	-0.65987	ENSMUST00000025595	0	Fam111a	ENSMUSG00000024691	262.233	-0.611066	0.117902	-4.93296	8.09935e-07	1.38289e-05	Fam111a	protein_coding	ENSMUSG00000024691	292.214	-0.57092	0.105679	-5.0356	4.76356e-07	1.21471e-05	Fam111a	protein_coding
chr19	34270277	34271468	3.21819	1.90111	-0.759405	ENSMUST00000129535	2967	Stambpl1	ENSMUSG00000024776	579.49	-0.376321	0.0835448	-4.4661	7.96593e-06	0.000102494	Stambpl1	protein_coding	ENSMUSG00000024776	603.556	-0.554348	0.0963033	-5.34384	9.09981e-08	2.81856e-06	Stambpl1	protein_coding
chr19	4941325	4941900	0.858185	0.432071	-0.990018	ENSMUST00000143930	1147	Peli3	ENSMUSG00000024901	458.023	-0.273797	0.0929208	-2.89094	0.00384094	0.0185482	Peli3	protein_coding	ENSMUSG00000024901	476.496	-0.261708	0.0920139	-2.62129	0.00875974	0.0385681	Peli3	protein_coding
chr19	6135492	6136198	1.34091	0.6049	-1.14845	ENSMUST00000123193	1963	Arl2	ENSMUSG00000024944	1245.53	0.25094	0.0725797	3.33564	0.000851045	0.00537942	Arl2	protein_coding	ENSMUSG00000024944	1685.2	0.380855	0.0706429	5.0757	3.86067e-07	1.00763e-05	Arl2	protein_coding
chr19	45144327	45144876	0.804548	0.432071	-0.896909	ENSMUST00000111948	-4855	Kazald1	ENSMUSG00000025213	59.0712	1.43149	0.176115	7.54884	4.39154e-14	3.67277e-12	Kazald1	protein_coding	ENSMUSG00000025213	78.5766	1.02167	0.182267	4.963	6.94135e-07	1.67385e-05	Kazald1	protein_coding
chr11	120241310	120242271	1.6091	1.03697	-0.633875	ENSMUST00000026448	-1233	2310003H01Rik	ENSMUSG00000025384	1465.23	-0.768982	0.094147	-8.04574	8.57267e-16	9.42047e-14	Faap100	protein_coding	ENSMUSG00000025384	1412.03	-0.525478	0.0896679	-5.50849	3.61917e-08	1.3047e-06	Faap100	protein_coding
chr7	88602824	88603519	0.965458	0.345657	-1.48187	ENSMUST00000135177	-2474	Cpeb1	ENSMUSG00000025586	896.151	-0.247954	0.07771	-2.98911	0.00279792	0.0143199	Cpeb1	protein_coding	ENSMUSG00000025586	1237.73	-0.383737	0.111279	-3.14573	0.00165676	0.0102881	Cpeb1	protein_coding
chr6	30844015	30845060	1.71637	0.6049	-1.50459	ENSMUST00000133916	1367	Copg2	ENSMUSG00000025607	2531.97	0.543715	0.057138	9.36545	7.57272e-21	1.53905e-18	Copg2	protein_coding	ENSMUSG00000025607	3285.18	0.46328	0.0741217	6.00734	1.88592e-09	1.00515e-07	Copg2	protein_coding
chr2	9972807	9973499	0.965458	0.432071	-1.15994	ENSMUST00000026888	-2585	Taf3	ENSMUSG00000025782	691.415	0.383147	0.0803426	4.69062	2.72384e-06	4.00619e-05	Taf3	protein_coding	ENSMUSG00000025782	725.418	0.371774	0.0987137	3.60602	0.000310933	0.00265234	Taf3	protein_coding
chr8	131245304	131245975	0.965458	0.345657	-1.48187	ENSMUST00000149116	-2258	Itgb1	ENSMUSG00000025809	6229.11	-0.272352	0.0629465	-4.28103	1.86026e-05	0.000213171	Itgb1	protein_coding	ENSMUSG00000025809	8087.21	-0.213078	0.0724216	-2.70871	0.00675453	0.0313247	Itgb1	protein_coding
chr1	65218535	65219809	2.09183	1.29621	-0.690458	ENSMUST00000149310	2330	Idh1	ENSMUSG00000025950	3933.76	-0.770739	0.0766223	-9.97067	2.04839e-23	5.86616e-21	Idh1	protein_coding	ENSMUSG00000025950	4571.5	-0.669518	0.0668403	-9.73635	2.10996e-22	1.70216e-19	Idh1	protein_coding
chr1	59024488	59027242	4.9882	2.93809	-0.763642	ENSMUST00000173590	3032	Trak2	ENSMUSG00000026028	10589.9	-0.279881	0.0653663	-4.29878	1.71737e-05	0.00019902	Trak2	protein_coding	ENSMUSG00000026028	7506.43	-0.464163	0.0639193	-6.95533	3.51727e-12	3.62933e-10	Trak2	protein_coding
chr1	95695864	95696496	1.07273	0.518486	-1.04891	ENSMUST00000144106	0	Dtymk	ENSMUSG00000026281	1254.38	-0.199024	0.0718172	-2.79854	0.0051334	0.0234988	Dtymk	protein_coding	ENSMUSG00000026281	1246.64	-0.291683	0.0826418	-3.43839	0.000585179	0.00441384	Dtymk	protein_coding
chr1	138331885	138332578	1.34091	0.259243	-2.37084	ENSMUST00000149783	2908	Ddx59	ENSMUSG00000026404	498.921	0.44276	0.0926413	4.44492	8.7925e-06	0.000111685	Ddx59	protein_coding	ENSMUSG00000026404	574.935	0.590508	0.0932703	5.83675	5.32275e-09	2.53266e-07	Ddx59	protein_coding
chr1	137952466	137953579	1.71637	1.12339	-0.611507	ENSMUST00000112064	2990	Cacna1s	ENSMUSG00000026407	85.3681	0.504675	0.154191	3.13802	0.00170092	0.00953696	Cacna1s	protein_coding	ENSMUSG00000026407	159.478	1.21928	0.131533	8.58522	9.06612e-18	2.6378e-15	Cacna1s	protein_coding
chr1	169220019	169220957	1.34091	0.777729	-0.785878	ENSMUST00000027839	-4762	Uck2	ENSMUSG00000026558	3896	-0.17939	0.0592177	-2.96465	0.00303031	0.015233	Uck2	protein_coding	ENSMUSG00000026558	2912.5	-0.210127	0.0738656	-2.71385	0.00665067	0.0309725	Uck2	protein_coding
chr1	191509360	191514791	23.4392	14.7768	-0.665583	ENSMUST00000165663	0	Cenpf	ENSMUSG00000026605	385.369	-0.463637	0.0988394	-4.6635	3.10875e-06	4.48881e-05	Cenpf	protein_coding	ENSMUSG00000026605	496.314	-0.729107	0.104667	-6.50058	8.00084e-11	5.89207e-09	Cenpf	protein_coding
chr1	190832963	190833671	0.965458	0.345657	-1.48187	ENSMUST00000085678	-1245	Kctd3	ENSMUSG00000026608	5287.39	0.191477	0.0548348	3.46074	0.000538688	0.00369037	Kctd3	protein_coding	ENSMUSG00000026608	4544.45	0.193318	0.0550164	3.47236	0.0005159	0.0039931	Kctd3	protein_coding
chr2	28597745	28598610	1.50182	0.864143	-0.797373	ENSMUST00000137588	0	Ak8	ENSMUSG00000026807	78.8173	0.594918	0.15647	3.48715	0.000488205	0.00340249	Ak8	protein_coding	ENSMUSG00000026807	102.201	0.697147	0.149155	4.27878	1.87919e-05	0.000263235	Ak8	protein_coding
chr2	71099886	71100790	1.34091	0.432071	-1.63387	ENSMUST00000138613	1284	Dync1i2	ENSMUSG00000027012	8971.28	-0.193396	0.0522373	-3.66453	0.000247791	0.00194175	Dync1i2	protein_coding	ENSMUSG00000027012	9178.83	-0.129469	0.0497488	-2.54596	0.0108977	0.0455361	Dync1i2	protein_coding
chr2	122426642	122427595	1.55546	0.950557	-0.710496	ENSMUST00000140808	-2095	Gatm	ENSMUSG00000027199	3973.76	-0.412123	0.0618333	-6.64741	2.98288e-11	1.43459e-09	Gatm	protein_coding	ENSMUSG00000027199	5056.78	-0.338056	0.0750895	-4.33522	1.45613e-05	0.000213405	Gatm	protein_coding
chr2	91544638	91545254	1.01909	0.432071	-1.23795	ENSMUST00000136412	638	Atg13	ENSMUSG00000027244	3098.36	0.219587	0.0616472	3.56301	0.000366628	0.00269636	Atg13	protein_coding	ENSMUSG00000027244	2751.66	0.170749	0.0650416	2.64365	0.00820184	0.0365102	Atg13	protein_coding
chr2	136937937	136938628	1.23364	0.432071	-1.51358	ENSMUST00000028735	3753	Jag1	ENSMUSG00000027276	418.611	-0.435126	0.101687	-4.10427	4.05597e-05	0.000414388	Jag1	protein_coding	ENSMUSG00000027276	584.16	-0.332941	0.10659	-2.86353	0.00418952	0.0215648	Jag1	protein_coding
chr2	90695194	90696291	1.66273	0.864143	-0.944215	ENSMUST00000143773	2213	Mtch2	ENSMUSG00000027282	4588.27	-0.168128	0.0571603	-2.93024	0.00338699	0.0167286	Mtch2	protein_coding	ENSMUSG00000027282	4443.38	-0.31663	0.0620707	-4.97032	6.68437e-07	1.61847e-05	Mtch2	protein_coding
chr2	118875835	118876475	1.01909	0.345657	-1.55987	ENSMUST00000028799	2951	Casc5	ENSMUSG00000027326	105.81	-0.726477	0.15024	-4.82121	1.42688e-06	2.27398e-05	Knl1	protein_coding	ENSMUSG00000027326	148.311	-0.750713	0.129612	-5.3548	8.56499e-08	2.6622e-06	Knl1	protein_coding
chr2	132644949	132646014	2.09183	1.2098	-0.789994	ENSMUST00000135685	2991	Mcm8	ENSMUSG00000027353	205.831	0.396832	0.121928	2.96537	0.00302318	0.0152093	Mcm8	protein_coding	ENSMUSG00000027353	234.533	0.45132	0.128735	2.89567	0.00378346	0.0198607	Mcm8	protein_coding
chr3	7368742	7369537	1.07273	0.6049	-0.82652	ENSMUST00000028999	2140	Pkia	ENSMUSG00000027499	19227.2	-0.450482	0.0777322	-5.80177	6.56186e-09	1.92288e-07	Pkia	protein_coding	ENSMUSG00000027499	16982.3	-0.559641	0.0981292	-5.38743	7.14704e-08	2.28963e-06	Pkia	protein_coding
chr2	181046896	181049931	11.6391	6.91314	-0.75157	ENSMUST00000103045	0	Stmn3	ENSMUSG00000027581	18830.4	-0.710738	0.0687853	-10.1977	2.02965e-24	6.93044e-22	Stmn3	protein_coding	ENSMUSG00000027581	18846.8	-0.61204	0.0703702	-8.4303	3.44782e-17	9.27149e-15	Stmn3	protein_coding
chr3	27040048	27040717	1.07273	0.6049	-0.82652	ENSMUST00000124727	-3991	Ect2	ENSMUSG00000027699	142.993	-0.443033	0.13162	-3.1787	0.00147939	0.00847586	Ect2	protein_coding	ENSMUSG00000027699	201.262	-0.484505	0.116404	-3.77151	0.000162264	0.001555	Ect2	protein_coding
chr3	36473863	36475164	1.87728	1.12339	-0.74079	ENSMUST00000029270	-2792	Ccna2	ENSMUSG00000027715	451.026	-0.464278	0.0918211	-5.05935	4.20687e-07	7.85711e-06	Ccna2	protein_coding	ENSMUSG00000027715	615.9	-0.410985	0.0905013	-4.20151	2.65146e-05	0.000348321	Ccna2	protein_coding
chr3	101949779	101951673	2.89637	1.29621	-1.15994	ENSMUST00000159833	1807	Casq2	ENSMUSG00000027861	74.2584	-0.459572	0.173127	-2.55514	0.0106146	0.0416064	Casq2	protein_coding	ENSMUSG00000027861	139.677	-0.590237	0.149541	-3.37781	0.00073065	0.00530588	Casq2	protein_coding
chr3	90187808	90188707	1.39455	0.345657	-2.01239	ENSMUST00000153978	4197	Slc27a3	ENSMUSG00000027932	271.024	-0.615386	0.116897	-5.05803	4.23599e-07	7.88157e-06	Slc27a3	protein_coding	ENSMUSG00000027932	420.024	-0.343243	0.100355	-3.16603	0.00154534	0.00974995	Slc27a3	protein_coding
chr3	88965550	88966070	0.804548	0.518486	-0.633875	ENSMUST00000029686	-1433	Hcn3	ENSMUSG00000028051	1069.2	-0.936465	0.08482	-10.8835	1.38081e-27	6.69199e-25	Hcn3	protein_coding	ENSMUSG00000028051	1314.08	-0.373902	0.09504	-3.65589	0.000256289	0.00226934	Hcn3	protein_coding
chr4	6345670	6346286	0.911821	0.345657	-1.39941	ENSMUST00000156078	4850	Nsmaf	ENSMUSG00000028245	2307.02	0.178315	0.0586159	3.00987	0.00261356	0.01356	Nsmaf	protein_coding	ENSMUSG00000028245	3244.61	0.236082	0.0673474	3.2516	0.00114759	0.00766557	Nsmaf	protein_coding
chr4	21888627	21890139	1.71637	1.03697	-0.726984	ENSMUST00000155220	3026	6230409E13Rik	ENSMUSG00000028246	3077.09	-0.248089	0.077187	-3.19875	0.00138023	0.00801962	Faxc	protein_coding	ENSMUSG00000028246	2856.49	-0.254597	0.0690642	-3.51239	0.000444103	0.00356972	Faxc	protein_coding
chr4	21776995	21777604	1.12637	0.6049	-0.896909	ENSMUST00000150368	1769	Sfrs18	ENSMUSG00000028248	14157.8	0.283902	0.0515121	5.47538	4.36584e-08	1.03875e-06	Pnisr	protein_coding	ENSMUSG00000028248	16416.3	0.206061	0.0633229	3.01685	0.00255413	0.0145087	Pnisr	protein_coding
chr3	144778467	144779026	0.911821	0.518486	-0.814447	ENSMUST00000029920	-2527	Odf2l	ENSMUSG00000028256	801.764	0.307456	0.074729	4.0468	5.19216e-05	0.000512465	Odf2l	protein_coding	ENSMUSG00000028256	998.183	0.258405	0.0837825	2.98755	0.00281224	0.0156316	Odf2l	protein_coding
chr4	68612150	68616363	9.9764	5.96259	-0.742581	ENSMUST00000030036	0	Dbc1	ENSMUSG00000028351	11488.3	-0.173471	0.0599801	-2.8812	0.00396161	0.0190095	Brinp1	protein_coding	ENSMUSG00000028351	5925.09	-0.266913	0.0581159	-4.45429	8.41718e-06	0.000135438	Brinp1	protein_coding
chr4	107568710	107569533	1.39455	0.864143	-0.690458	ENSMUST00000134254	2737	0610037L13Rik	ENSMUSG00000028608	2177.72	0.351818	0.0627484	5.56062	2.68815e-08	6.73856e-07	0610037L13Rik	protein_coding	ENSMUSG00000028608	2582.29	0.306453	0.0696114	4.10944	3.96612e-05	0.000489165	0610037L13Rik	protein_coding
chr4	107508424	107509987	3.70092	2.16036	-0.776615	ENSMUST00000106731	4836	Lrp8	ENSMUSG00000028613	8582.25	-0.294776	0.0596121	-4.90137	9.51714e-07	1.59471e-05	Lrp8	protein_coding	ENSMUSG00000028613	6721.43	-0.350181	0.0579565	-5.8549	4.77292e-09	2.32081e-07	Lrp8	protein_coding
chr4	106917783	106919507	3.27183	1.64187	-0.994756	ENSMUST00000137837	-1652	Lrrc42	ENSMUSG00000028617	927.464	-0.334966	0.0713445	-4.67722	2.90789e-06	4.23111e-05	Lrrc42	protein_coding	ENSMUSG00000028617	1118.43	-0.203379	0.07463	-2.57639	0.00998378	0.0426045	Lrrc42	protein_coding
chr4	118960300	118961278	1.50182	0.864143	-0.797373	ENSMUST00000127737	-4904	Ybx1	ENSMUSG00000028639	12045.6	-0.332697	0.0813635	-4.16262	3.14619e-05	0.000334267	Ybx1	protein_coding	ENSMUSG00000028639	9419.89	-0.438418	0.110393	-3.96568	7.31859e-05	0.000811815	Ybx1	protein_coding
chr4	116721363	116722115	1.12637	0.691314	-0.704264	ENSMUST00000135121	4284	Eif2b3	ENSMUSG00000028683	820.91	0.215142	0.0782251	2.68591	0.00723333	0.0308269	Eif2b3	protein_coding	ENSMUSG00000028683	966.23	0.280867	0.0819297	3.34385	0.000826254	0.00583772	Eif2b3	protein_coding
chr4	129779015	129779758	1.12637	0.6049	-0.896909	ENSMUST00000118199	-44	Pef1	ENSMUSG00000028779	1303.98	0.366734	0.0695491	5.1889	2.1154e-07	4.23102e-06	Pef1	protein_coding	ENSMUSG00000028779	1460.67	0.369562	0.0707304	5.02423	5.05459e-07	1.27973e-05	Pef1	protein_coding
chr4	128633994	128634736	1.12637	0.518486	-1.1193	ENSMUST00000147731	3907	Adc	ENSMUSG00000028789	919.715	0.560035	0.0817496	6.69456	2.16324e-11	1.08167e-09	Azin2	protein_coding	ENSMUSG00000028789	1015.15	0.509302	0.0800159	6.0995	1.06401e-09	6.07204e-08	Azin2	protein_coding
chr4	128761281	128761980	1.07273	0.518486	-1.04891	ENSMUST00000147238	154	Rnf19b	ENSMUSG00000028793	2171.61	-0.319432	0.0758995	-4.17369	2.99701e-05	0.000321126	Rnf19b	protein_coding	ENSMUSG00000028793	1751.47	-0.264135	0.0770662	-3.37464	0.000739124	0.00535646	Rnf19b	protein_coding
chr5	13393072	13393568	0.750912	0.259243	-1.53434	ENSMUST00000095012	-3216	Sema3a	ENSMUSG00000028883	1470.91	-0.27825	0.0746984	-3.62824	0.000285361	0.00218188	Sema3a	protein_coding	ENSMUSG00000028883	1042.44	-0.658148	0.109566	-5.29923	1.16293e-07	3.52213e-06	Sema3a	protein_coding
chr4	132251555	132252174	1.18	0.6049	-0.964023	ENSMUST00000153809	-4762	Eya3	ENSMUSG00000028886	2031.48	0.216878	0.0643722	3.33549	0.000851494	0.00537942	Eya3	protein_coding	ENSMUSG00000028886	1697.24	0.297665	0.0678473	4.22994	2.33751e-05	0.000312632	Eya3	protein_coding
chr4	140506180	140507062	1.23364	0.518486	-1.25055	ENSMUST00000130958	3855	Padi2	ENSMUSG00000028927	642.07	0.923367	0.0953145	9.34921	8.83053e-21	1.77559e-18	Padi2	protein_coding	ENSMUSG00000028927	1281.83	0.545388	0.146031	3.85883	0.00011393	0.00116477	Padi2	protein_coding
chr4	150392618	150393143	0.858185	0.259243	-1.72698	ENSMUST00000138052	-2365	Per3	ENSMUSG00000028957	1865.47	0.206059	0.0717591	2.7918	0.00524156	0.0238955	Per3	protein_coding	ENSMUSG00000028957	2255.1	0.296403	0.0682584	4.11435	3.8827e-05	0.000481553	Per3	protein_coding
chr5	22999869	23000466	0.858185	0.518486	-0.726984	ENSMUST00000126586	856	Mll5	ENSMUSG00000029004	7219.21	-0.363125	0.0652627	-5.44277	5.24598e-08	1.22175e-06	Kmt2e	protein_coding	ENSMUSG00000029004	6269.41	-0.409467	0.0706366	-5.49354	3.93949e-08	1.39241e-06	Kmt2e	protein_coding
chr4	154370658	154371394	1.28728	0.691314	-0.896909	ENSMUST00000127661	-390	Plch2	ENSMUSG00000029055	3117.1	0.68377	0.070489	9.7148	2.60767e-22	6.57167e-20	Plch2	protein_coding	ENSMUSG00000029055	3502.15	0.339184	0.0754861	4.18465	2.85602e-05	0.000369182	Plch2	protein_coding
chr5	64690963	64691634	1.01909	0.6049	-0.752519	ENSMUST00000140960	1196	Tbc1d1	ENSMUSG00000029174	1216.2	0.354713	0.0728781	4.86809	1.12685e-06	1.84562e-05	Tbc1d1	protein_coding	ENSMUSG00000029174	1319.79	0.409856	0.0918864	4.28951	1.79069e-05	0.000252231	Tbc1d1	protein_coding
chr5	100460437	100461066	0.965458	0.518486	-0.896909	ENSMUST00000135424	4022	Hnrpdl	ENSMUSG00000029328	9687.75	-0.203387	0.052949	-3.78695	0.000152508	0.001288	Hnrnpdl	protein_coding	ENSMUSG00000029328	9094.19	-0.289737	0.062249	-4.54039	5.61505e-06	9.57309e-05	Hnrnpdl	protein_coding
chr5	117820009	117820955	1.55546	0.864143	-0.847999	ENSMUST00000149669	-4706	Wsb2	ENSMUSG00000029364	12161.3	-0.194092	0.0565956	-3.43747	0.000587173	0.00397072	Wsb2	protein_coding	ENSMUSG00000029364	8088.5	-0.387614	0.0865334	-4.33331	1.46885e-05	0.000214208	Wsb2	protein_coding
chr6	17855335	17856463	1.55546	0.950557	-0.710496	ENSMUST00000127322	0	St7	ENSMUSG00000029534	1036.41	-0.215778	0.0671116	-3.12037	0.00180623	0.0100086	St7	protein_coding	ENSMUSG00000029534	885.412	-0.288163	0.0732881	-3.77228	0.000161763	0.00155104	St7	protein_coding
chr5	140650329	140651119	1.07273	0.345657	-1.63387	ENSMUST00000129747	0	Mad1l1	ENSMUSG00000029554	727.742	0.206384	0.0769409	2.59569	0.00944022	0.0380853	Mad1l1	protein_coding	ENSMUSG00000029554	946.447	0.604272	0.10688	5.4421	5.2657e-08	1.77672e-06	Mad1l1	protein_coding
chr5	147028813	147029929	1.50182	0.691314	-1.1193	ENSMUST00000162219	0	Rnf6	ENSMUSG00000029634	2252.58	0.348924	0.0741238	4.67128	2.99334e-06	4.34206e-05	Rnf6	protein_coding	ENSMUSG00000029634	2432.09	0.284739	0.0655638	4.2708	1.94769e-05	0.000271545	Rnf6	protein_coding
chr5	135647421	135648470	1.71637	0.691314	-1.31195	ENSMUST00000111188	3141	Bcl7b	ENSMUSG00000029681	1007.44	0.271014	0.0888251	2.95613	0.0031153	0.0155938	Bcl7b	protein_coding	ENSMUSG00000029681	1116.15	0.339523	0.0779171	4.15529	3.24869e-05	0.000410961	Bcl7b	protein_coding
chr6	38512670	38513495	1.34091	0.691314	-0.955803	ENSMUST00000162530	3457	Luc7l2	ENSMUSG00000029823	9965.25	0.245052	0.0568883	4.285	1.82737e-05	0.00021022	Luc7l2	protein_coding	ENSMUSG00000029823	10885.2	0.220264	0.060899	3.51636	0.000437505	0.00352787	Luc7l2	protein_coding
chr6	66489515	66490202	1.01909	0.6049	-0.752519	ENSMUST00000135411	3845	Mad2l1	ENSMUSG00000029910	590.198	-0.295067	0.0876717	-3.44691	0.000567037	0.00385386	Mad2l1	protein_coding	ENSMUSG00000029910	534.523	-0.302409	0.0951848	-3.03671	0.00239179	0.0137734	Mad2l1	protein_coding
chr6	83108765	83109681	1.55546	0.777729	-1	ENSMUST00000032106	2369	1700003E16Rik	ENSMUSG00000030030	801.958	-0.256089	0.0823367	-3.06727	0.00216026	0.011613	1700003E16Rik	protein_coding	ENSMUSG00000030030	570.964	-0.445271	0.114375	-3.61556	0.000299704	0.00258086	1700003E16Rik	protein_coding
chr6	119776697	119777446	1.18	0.518486	-1.18642	ENSMUST00000032279	-1454	Erc1	ENSMUSG00000030172	8605.66	-0.193448	0.0748494	-2.54517	0.0109223	0.0425568	Erc1	protein_coding	ENSMUSG00000030172	6140.85	-0.226132	0.0719397	-2.8207	0.00479185	0.0239189	Erc1	protein_coding
chr6	135150777	135151632	1.44819	0.864143	-0.744906	ENSMUST00000151071	2349	8430419L09Rik	ENSMUSG00000030207	5663.43	0.188524	0.0555932	3.39616	0.000683379	0.00450211	Fam234b	protein_coding	ENSMUSG00000030207	5457.35	0.215511	0.0707527	3.0174	0.0025495	0.0144934	Fam234b	protein_coding
chr6	114818424	114821083	4.72002	1.64187	-1.52345	ENSMUST00000123478	-3650	Vgll4	ENSMUSG00000030315	1003.85	-0.235942	0.0733036	-3.17112	0.00151853	0.00866078	Vgll4	protein_coding	ENSMUSG00000030315	803.672	-0.240967	0.0896431	-2.52505	0.0115681	0.0476215	Vgll4	protein_coding
chr7	107783742	107784945	1.77001	0.6049	-1.54899	ENSMUST00000123960	882	Rab6	ENSMUSG00000030704	21173.5	-0.260783	0.0649791	-3.96502	7.33906e-05	0.000692194	Rab6a	protein_coding	ENSMUSG00000030704	19597.4	-0.369156	0.0719823	-4.83531	1.32939e-06	2.87732e-05	Rab6a	protein_coding
chr7	53293808	53294501	1.07273	0.518486	-1.04891	ENSMUST00000033121	4744	Nomo1	ENSMUSG00000030835	5232.3	0.208559	0.0696996	2.99962	0.00270316	0.0139368	Nomo1	protein_coding	ENSMUSG00000030835	5227.01	0.47873	0.0805319	5.84826	4.96741e-09	2.3957e-07	Nomo1	protein_coding
chrX	71488409	71491908	18.2364	11.4067	-0.676943	ENSMUST00000130007	0	Flna	ENSMUSG00000031328	9543.3	-0.956627	0.0693246	-13.5646	6.49262e-42	1.02264e-38	Flna	protein_coding	ENSMUSG00000031328	7764.2	-0.849608	0.0918816	-9.01061	2.04909e-19	8.3826e-17	Flna	protein_coding
chr5	48631554	48632394	1.23364	0.777729	-0.665583	ENSMUST00000172493	-1394	Slit2	ENSMUSG00000031558	2008.96	-0.250494	0.0881057	-2.68232	0.00731126	0.0310767	Slit2	protein_coding	ENSMUSG00000031558	2500.07	-0.307727	0.0963327	-2.65793	0.0078622	0.0353709	Slit2	protein_coding
chr8	98244824	98245504	1.07273	0.172829	-2.63387	ENSMUST00000154593	3917	Setd6	ENSMUSG00000031671	445.809	-0.313436	0.092584	-3.2745	0.00105847	0.00642667	Setd6	protein_coding	ENSMUSG00000031671	471.972	-0.293698	0.0904841	-3.10074	0.00193036	0.0115978	Setd6	protein_coding
chr8	112094078	112094774	1.18	0.691314	-0.771378	ENSMUST00000034159	4288	Txnl4b	ENSMUSG00000031723	658.586	0.422985	0.0820192	4.9595	7.06732e-07	1.22888e-05	Txnl4b	protein_coding	ENSMUSG00000031723	647.093	0.340776	0.0961226	3.14239	0.00167574	0.0103647	Txnl4b	protein_coding
chr8	97186083	97186655	0.858185	0.259243	-1.72698	ENSMUST00000034228	-3895	Arl2bp	ENSMUSG00000031776	5941.51	-0.279837	0.0606744	-4.54663	5.45117e-06	7.31246e-05	Arl2bp	protein_coding	ENSMUSG00000031776	6677.11	-0.347555	0.0596053	-5.69705	1.21896e-08	5.11445e-07	Arl2bp	protein_coding
chr8	121979459	121980206	1.44819	0.777729	-0.896909	ENSMUST00000148328	3129	Necab2	ENSMUSG00000031837	1533.3	-0.303983	0.0923159	-3.10413	0.00190838	0.0104521	Necab2	protein_coding	ENSMUSG00000031837	2802.44	-0.246054	0.0763758	-3.0925	0.00198477	0.0118485	Necab2	protein_coding
chr9	30754382	30754931	0.804548	0.345657	-1.21884	ENSMUST00000163037	3341	Adamts8	ENSMUSG00000031994	311.277	-0.444306	0.100874	-4.23962	2.23902e-05	0.000249969	Adamts8	protein_coding	ENSMUSG00000031994	148.729	-0.667052	0.141651	-4.15698	3.22477e-05	0.000408225	Adamts8	protein_coding
chr9	70267787	70270030	6.38275	2.85167	-1.16237	ENSMUST00000034742	0	Ccnb2	ENSMUSG00000032218	116.596	-0.503642	0.142761	-3.40708	0.000656608	0.00434543	Ccnb2	protein_coding	ENSMUSG00000032218	141.067	-0.644683	0.137996	-4.75693	1.96563e-06	4.01449e-05	Ccnb2	protein_coding
chr9	56269825	56270580	1.44819	0.777729	-0.896909	ENSMUST00000034879	3376	Hmg20a	ENSMUSG00000032329	4314.84	0.186677	0.04962	3.7244	0.000195781	0.00159915	Hmg20a	protein_coding	ENSMUSG00000032329	4705.17	0.278789	0.0568681	4.74829	2.05149e-06	4.16112e-05	Hmg20a	protein_coding
chr9	88371931	88372711	1.18	0.172829	-2.77138	ENSMUST00000174145	2872	Syncrip	ENSMUSG00000032423	4438.86	-0.172818	0.0628897	-2.69983	0.00693748	0.0298079	Syncrip	protein_coding	ENSMUSG00000032423	4226.15	-0.173103	0.0606343	-2.71586	0.00661044	0.0308213	Syncrip	protein_coding
chr9	114601294	114601785	0.750912	0.259243	-1.53434	ENSMUST00000047404	3388	Dync1li1	ENSMUSG00000032435	4184.49	-0.273457	0.054717	-4.86171	1.16375e-06	1.89525e-05	Dync1li1	protein_coding	ENSMUSG00000032435	4496.83	-0.21816	0.0591655	-3.4819	0.000497865	0.00388742	Dync1li1	protein_coding
chr11	29354210	29354743	0.911821	0.345657	-1.39941	ENSMUST00000137227	-1753	Ccdc88a	ENSMUSG00000032740	7619.65	-0.204275	0.071707	-2.85879	0.00425255	0.0201605	Ccdc88a	protein_coding	ENSMUSG00000032740	7215.7	-0.349212	0.0730788	-4.66626	3.06734e-06	5.80995e-05	Ccdc88a	protein_coding
chr7	132856197	132857059	1.34091	0.777729	-0.785878	ENSMUST00000148701	4694	D430042O09Rik	ENSMUSG00000032743	1413.46	0.227419	0.0690216	3.21985	0.00128259	0.00753801	D430042O09Rik	protein_coding	ENSMUSG00000032743	1458.47	0.234189	0.0749311	3.04312	0.00234137	0.0135475	D430042O09Rik	protein_coding
chr18	46883551	46884472	1.39455	0.518486	-1.42742	ENSMUST00000035804	3525	Cdo1	ENSMUSG00000033022	1754.7	-0.592687	0.0701134	-8.36282	6.12391e-17	7.82081e-15	Cdo1	protein_coding	ENSMUSG00000033022	2206.88	-0.680546	0.0807411	-8.0775	6.61102e-16	1.46666e-13	Cdo1	protein_coding
chr16	49013590	49014479	1.50182	0.864143	-0.797373	ENSMUST00000133754	184	C330027C09Rik	ENSMUSG00000033031	344.612	-0.316989	0.100906	-3.20601	0.00134589	0.00784415	C330027C09Rik	protein_coding	ENSMUSG00000033031	357.155	-0.382257	0.118865	-3.00527	0.00265347	0.0149694	C330027C09Rik	protein_coding
chr6	88671859	88672792	1.6091	0.864143	-0.896909	ENSMUST00000113585	-1614	Mgll	ENSMUSG00000033174	6775.11	-0.192094	0.0748481	-2.60219	0.00926305	0.0376033	Mgll	protein_coding	ENSMUSG00000033174	5716.87	-0.310561	0.0541785	-5.70295	1.17749e-08	4.97574e-07	Mgll	protein_coding
chr9	30726976	30727768	1.12637	0.6049	-0.896909	ENSMUST00000065112	2270	Adamts15	ENSMUSG00000033453	506.601	-0.414147	0.103086	-3.77814	0.000158001	0.00132492	Adamts15	protein_coding	ENSMUSG00000033453	831.634	-0.352643	0.107575	-2.81067	0.00494379	0.0245502	Adamts15	protein_coding
chr5	108977879	108979869	5.20274	3.37016	-0.626457	ENSMUST00000129040	0	Cplx1	ENSMUSG00000033615	13671.2	-0.543576	0.0677953	-7.8601	3.83819e-15	3.85881e-13	Cplx1	protein_coding	ENSMUSG00000033615	11930.4	-0.561839	0.109522	-4.68407	2.8123e-06	5.36696e-05	Cplx1	protein_coding
chr11	88836881	88837697	1.34091	0.777729	-0.785878	ENSMUST00000036649	1634	Coil	ENSMUSG00000033983	952.855	0.23864	0.0796016	2.84696	0.00441396	0.0208102	Coil	protein_coding	ENSMUSG00000033983	1079.58	0.397206	0.0757302	5.02746	4.97016e-07	1.26195e-05	Coil	protein_coding
chr9	45928390	45929328	1.55546	0.777729	-1	ENSMUST00000122865	-1992	Sik3	ENSMUSG00000034135	4004.01	0.223161	0.0797089	2.86495	0.0041708	0.019847	Sik3	protein_coding	ENSMUSG00000034135	4932.99	0.318351	0.0907097	3.55998	0.000370878	0.00306584	Sik3	protein_coding
chr11	4955747	4956538	1.18	0.691314	-0.771378	ENSMUST00000037218	-1593	Rasl10a	ENSMUSG00000034209	642.826	-0.368014	0.116704	-3.10777	0.00188504	0.0103603	Rasl10a	protein_coding	ENSMUSG00000034209	207.265	-1.00917	0.169305	-5.57999	2.40537e-08	9.20055e-07	Rasl10a	protein_coding
chr6	91117522	91118256	1.18	0.518486	-1.18642	ENSMUST00000134154	-3502	Hdac11	ENSMUSG00000034245	5408.74	0.172913	0.0562603	3.05642	0.00223995	0.0119788	Hdac11	protein_coding	ENSMUSG00000034245	11291.8	0.213064	0.0815879	2.58424	0.00975939	0.0419089	Hdac11	protein_coding
chr3	68830697	68831433	1.07273	0.6049	-0.82652	ENSMUST00000149174	2583	Smc4	ENSMUSG00000034349	832.263	-0.502802	0.087024	-5.71711	1.0835e-08	3.03397e-07	Smc4	protein_coding	ENSMUSG00000034349	893.995	-0.555814	0.0754099	-6.99228	2.70447e-12	2.8915e-10	Smc4	protein_coding
chr8	97083313	97084704	1.93092	1.03697	-0.896909	ENSMUST00000156377	-1846	Cpne2	ENSMUSG00000034361	1225.76	-0.445561	0.109202	-3.92208	8.77879e-05	0.000809009	Cpne2	protein_coding	ENSMUSG00000034361	1549.05	-0.503044	0.094026	-4.79264	1.64598e-06	3.45714e-05	Cpne2	protein_coding
chr4	108232289	108232973	1.07273	0.432071	-1.31195	ENSMUST00000128042	3950	Zcchc11	ENSMUSG00000034610	1961.84	0.181705	0.0657461	2.72095	0.00650955	0.028343	Zcchc11	protein_coding	ENSMUSG00000034610	2462.99	0.214564	0.0651014	3.15472	0.00160654	0.0100327	Zcchc11	protein_coding
chr10	122337254	122338288	1.66273	0.864143	-0.944215	ENSMUST00000162969	4832	Ppm1h	ENSMUSG00000034613	4025.11	-0.299199	0.0630556	-4.6472	3.36467e-06	4.81056e-05	Ppm1h	protein_coding	ENSMUSG00000034613	2956.81	-0.337091	0.0575751	-5.58334	2.35939e-08	9.0834e-07	Ppm1h	protein_coding
chrX	117398575	117399260	1.39455	0.691314	-1.01239	ENSMUST00000113358	-4608	Pcdh11x	ENSMUSG00000034755	2732.56	-0.492428	0.079138	-6.28818	3.21218e-10	1.23653e-08	Pcdh11x	protein_coding	ENSMUSG00000034755	3821.11	-0.418306	0.0951409	-4.06259	4.85304e-05	0.000578066	Pcdh11x	protein_coding
chr10	80690216	80691222	1.71637	0.864143	-0.990018	ENSMUST00000146030	2309	Atcay	ENSMUSG00000034958	10696.7	-0.268716	0.0526629	-5.05014	4.41495e-07	8.16507e-06	Atcay	protein_coding	ENSMUSG00000034958	8965.87	-0.328635	0.0578371	-5.47013	4.49712e-08	1.5498e-06	Atcay	protein_coding
chr10	80557101	80558022	1.44819	0.950557	-0.607402	ENSMUST00000127374	-1782	Creb3l3	ENSMUSG00000035041	43.3744	0.968337	0.184275	5.06613	4.05978e-07	7.62763e-06	Creb3l3	protein_coding	ENSMUSG00000035041	51.6623	0.965447	0.184375	4.64189	3.45235e-06	6.36264e-05	Creb3l3	protein_coding
chr12	53232705	53234157	3.05728	1.90111	-0.685405	ENSMUST00000159567	0	Nubpl	ENSMUSG00000035142	218.354	0.473665	0.113673	3.88405	0.000102729	0.000925489	Nubpl	protein_coding	ENSMUSG00000035142	269.762	0.456791	0.12715	3.18771	0.00143402	0.00919472	Nubpl	protein_coding
chr19	56887010	56887704	1.07273	0.345657	-1.63387	ENSMUST00000076085	470	A630007B06Rik	ENSMUSG00000035173	2376.25	-0.285442	0.067708	-4.22928	2.34436e-05	0.00026004	Ccdc186	protein_coding	ENSMUSG00000035173	2492.18	-0.208221	0.0760573	-2.61503	0.00892186	0.0391265	Ccdc186	protein_coding
chr6	100617761	100618570	1.34091	0.259243	-2.37084	ENSMUST00000162776	2558	Shq1	ENSMUSG00000035378	296.376	0.318669	0.103447	2.9237	0.00345896	0.0170255	Shq1	protein_coding	ENSMUSG00000035378	272.427	0.390761	0.117961	3.2168	0.00129628	0.00846757	Shq1	protein_coding
chr7	4661917	4662903	1.55546	0.6049	-1.36257	ENSMUST00000123637	1339	Brsk1	ENSMUSG00000035390	11486	-0.167714	0.0549367	-3.04226	0.00234809	0.0124148	Brsk1	protein_coding	ENSMUSG00000035390	9114.75	-0.223213	0.0697374	-3.03803	0.00238128	0.0137351	Brsk1	protein_coding
chr17	25373516	25374427	1.28728	0.6049	-1.08955	ENSMUST00000038973	2635	Gnptg	ENSMUSG00000035521	2605.78	0.328549	0.066521	4.83881	1.30616e-06	2.11006e-05	Gnptg	protein_coding	ENSMUSG00000035521	2676.51	0.218355	0.0710477	2.82847	0.00467717	0.0234636	Gnptg	protein_coding
chr10	110737801	110738430	0.858185	0.518486	-0.726984	ENSMUST00000040454	2068	Bbs10	ENSMUSG00000035759	227.724	0.395362	0.112482	3.43321	0.000596478	0.00402644	Bbs10	protein_coding	ENSMUSG00000035759	310.064	0.379804	0.105094	3.35649	0.000789377	0.00563097	Bbs10	protein_coding
chr10	79225695	79226869	1.77001	0.864143	-1.03441	ENSMUST00000047203	2798	Rnf126	ENSMUSG00000035890	2254.79	0.201322	0.071062	2.76035	0.00577396	0.0258625	Rnf126	protein_coding	ENSMUSG00000035890	1815.06	0.25175	0.084363	2.73685	0.00620312	0.0293973	Rnf126	protein_coding
chr18	74365897	74366912	1.50182	0.777729	-0.949376	ENSMUST00000040188	561	Ska1	ENSMUSG00000036223	23.605	-0.596427	0.192642	-3.23591	0.00121257	0.00718234	Ska1	protein_coding	ENSMUSG00000036223	33.2617	-0.599745	0.197274	-2.99918	0.0027071	0.0151947	Ska1	protein_coding
chr18	39391047	39391810	1.07273	0.518486	-1.04891	ENSMUST00000154551	4027	Arhgap26	ENSMUSG00000036452	4977.82	-0.278645	0.0548348	-5.0054	5.57457e-07	9.94947e-06	Arhgap26	protein_coding	ENSMUSG00000036452	4678.25	-0.211003	0.0637283	-3.03136	0.00243457	0.0139697	Arhgap26	protein_coding
chr8	68141246	68143874	7.29457	1.38263	-2.39941	ENSMUST00000152320	0	2001-03-01	ENSMUSG00000036469	2648.97	-0.568635	0.0785755	-7.18175	6.88259e-13	4.54852e-11	March1	protein_coding	ENSMUSG00000036469	2247.01	-0.818895	0.0969075	-7.89426	2.92049e-15	5.82393e-13	March1	protein_coding
chr8	90771845	90773080	1.66273	0.864143	-0.944215	ENSMUST00000125043	2663	Papd5	ENSMUSG00000036779	2138.06	0.244975	0.0575231	4.23847	2.25049e-05	0.000250805	Papd5	protein_coding	ENSMUSG00000036779	2387.14	0.36113	0.0645271	5.38253	7.34453e-08	2.33603e-06	Papd5	protein_coding
chr2	24850726	24851321	0.965458	0.518486	-0.896909	ENSMUST00000145508	0	Pnpla7	ENSMUSG00000036833	375.995	0.445073	0.0928364	4.5804	4.64077e-06	6.37002e-05	Pnpla7	protein_coding	ENSMUSG00000036833	392.929	0.437234	0.0969304	4.43889	9.04251e-06	0.000143036	Pnpla7	protein_coding
chr17	87774918	87775478	0.911821	0.345657	-1.39941	ENSMUST00000148126	-2715	Ttc7	ENSMUSG00000036918	433.591	1.05452	0.0987483	10.4875	9.85717e-26	4.05023e-23	Ttc7	protein_coding	ENSMUSG00000036918	332.106	0.46203	0.134754	3.16249	0.00156425	0.00983085	Ttc7	protein_coding
chr19	44478002	44478829	1.39455	0.777729	-0.842461	ENSMUST00000041331	3371	Scd1	ENSMUSG00000037071	5937.14	-0.62259	0.0817438	-7.50569	6.11056e-14	4.87323e-12	Scd1	protein_coding	ENSMUSG00000037071	7047.49	-0.578314	0.0662055	-8.34525	7.10651e-17	1.88248e-14	Scd1	protein_coding
chr12	12944488	12950346	25.6383	16.3323	-0.650571	ENSMUST00000130990	0	Mycn	ENSMUSG00000037169	879.384	-0.363938	0.0890499	-4.0242	5.71694e-05	0.000559295	Mycn	protein_coding	ENSMUSG00000037169	462.219	-0.622164	0.117859	-4.6597	3.16671e-06	5.94738e-05	Mycn	protein_coding
chr17	34330542	34331223	1.07273	0.432071	-1.31195	ENSMUST00000166582	545	Tap1	ENSMUSG00000037321	101.521	0.422668	0.155163	2.53625	0.0112045	0.0434592	Tap1	protein_coding	ENSMUSG00000037321	161.311	0.605486	0.126023	4.45703	8.31017e-06	0.000134478	Tap1	protein_coding
chr4	133707074	133707862	1.28728	0.432071	-1.57498	ENSMUST00000141992	2537	Ccdc21	ENSMUSG00000037443	648.115	0.446298	0.0804174	5.41144	6.25208e-08	1.43064e-06	Cep85	protein_coding	ENSMUSG00000037443	721.348	0.382406	0.081299	4.50332	6.6901e-06	0.000111072	Cep85	protein_coding
chr5	125759051	125760353	1.98455	1.2098	-0.714045	ENSMUST00000124582	4177	Scarb1	ENSMUSG00000037936	1728.56	-0.195364	0.0669592	-2.97307	0.00294837	0.0149122	Scarb1	protein_coding	ENSMUSG00000037936	1498.58	-0.302955	0.0999754	-2.93433	0.00334263	0.017961	Scarb1	protein_coding
chr10	58278489	58279115	0.858185	0.172829	-2.31195	ENSMUST00000133151	1684	Sh3rf3	ENSMUSG00000037990	4044.57	-0.174907	0.0637542	-2.69089	0.00712618	0.0304251	Sh3rf3	protein_coding	ENSMUSG00000037990	1714.26	-0.582687	0.11103	-4.60814	4.06284e-06	7.29832e-05	Sh3rf3	protein_coding
chr10	44244926	44246059	1.6091	0.432071	-1.89691	ENSMUST00000167340	2249	Prdm1	ENSMUSG00000038151	94.3725	-0.449247	0.16053	-2.77589	0.00550515	0.0248395	Prdm1	protein_coding	ENSMUSG00000038151	67.9257	-0.664958	0.173837	-3.30157	0.000961459	0.0066371	Prdm1	protein_coding
chr3	97658525	97659412	1.55546	0.864143	-0.847999	ENSMUST00000107038	-2507	Pde4dip	ENSMUSG00000038170	11242.6	-0.183154	0.0675981	-2.58945	0.00961302	0.0386176	Pde4dip	protein_coding	ENSMUSG00000038170	8740.91	-0.232187	0.0815277	-2.51996	0.0117369	0.0480412	Pde4dip	protein_coding
chr3	97468122	97468815	0.911821	0.432071	-1.07748	ENSMUST00000132719	-1638	Prkab2	ENSMUSG00000038205	3071.33	-0.436423	0.0571973	-7.5111	5.86341e-14	4.69594e-12	Prkab2	protein_coding	ENSMUSG00000038205	2531.35	-0.468336	0.0696468	-6.43276	1.25306e-10	8.79026e-09	Prkab2	protein_coding
chr11	98258309	98259006	1.07273	0.345657	-1.63387	ENSMUST00000128058	2723	Pgap3	ENSMUSG00000038208	434.274	0.583233	0.0933128	6.23024	4.65734e-10	1.74314e-08	Pgap3	protein_coding	ENSMUSG00000038208	337.366	0.526622	0.124543	3.78297	0.000154966	0.00149556	Pgap3	protein_coding
chr2	155785442	155786143	1.07273	0.432071	-1.31195	ENSMUST00000109618	3114	Cep250	ENSMUSG00000038241	2018.81	-0.372134	0.0723451	-4.97824	6.41649e-07	1.13027e-05	Cep250	protein_coding	ENSMUSG00000038241	2520.32	-0.229889	0.0787104	-2.90118	0.00371761	0.0195729	Cep250	protein_coding
chr11	97692914	97693578	1.07273	0.259243	-2.04891	ENSMUST00000127575	-919	Lasp1	ENSMUSG00000038366	6488.66	-0.431639	0.0561892	-7.58631	3.29138e-14	2.86684e-12	Lasp1	protein_coding	ENSMUSG00000038366	5105.76	-0.340038	0.0759037	-4.15228	3.29178e-05	0.000415819	Lasp1	protein_coding
chr11	97540440	97541259	1.28728	0.518486	-1.31195	ENSMUST00000151729	3076	Mllt6	ENSMUSG00000038437	5265.93	0.252636	0.0612955	4.08933	4.32627e-05	0.000436344	Mllt6	protein_coding	ENSMUSG00000038437	5189.92	0.26767	0.0854342	2.91695	0.00353475	0.0187998	Mllt6	protein_coding
chr2	181601832	181602843	1.71637	0.777729	-1.14202	ENSMUST00000153214	2769	Polr3k	ENSMUSG00000038628	2095.47	-0.270545	0.06861	-3.91266	9.12853e-05	0.000836346	Polr3k	protein_coding	ENSMUSG00000038628	2160.89	-0.324007	0.0739558	-4.19716	2.70288e-05	0.000353506	Polr3k	protein_coding
chr1	183133863	183134735	1.07273	0.6049	-0.82652	ENSMUST00000161531	-482	Wdr26	ENSMUSG00000038733	9000.03	0.209097	0.0546243	3.78431	0.000154137	0.00129828	Wdr26	protein_coding	ENSMUSG00000038733	9637.93	0.203214	0.0540852	3.7309	0.0001908	0.00177852	Wdr26	protein_coding
chr11	95230663	95232171	2.95001	1.64187	-0.845379	ENSMUST00000155999	-4610	Fam117a	ENSMUSG00000038893	173.725	0.446624	0.122611	3.4985	0.000467877	0.00328871	Fam117a	protein_coding	ENSMUSG00000038893	231.08	0.356717	0.123637	2.83319	0.00460866	0.0231844	Fam117a	protein_coding
chr7	87452748	87453740	1.66273	0.950557	-0.806711	ENSMUST00000174051	-543	Prc1	ENSMUSG00000038943	281.8	-0.813948	0.108911	-7.2836	3.25036e-13	2.25037e-11	Prc1	protein_coding	ENSMUSG00000038943	396.6	-0.771441	0.0986401	-7.27102	3.56789e-13	4.45936e-11	Prc1	protein_coding
chr10	24916626	24920904	32.9328	19.184	-0.779625	ENSMUST00000100012	0	Akap7	ENSMUSG00000039166	4852.62	-0.355498	0.0813825	-4.40663	1.04989e-05	0.000130125	Akap7	protein_coding	ENSMUSG00000039166	2929.76	-0.24998	0.0854317	-2.90392	0.0036852	0.0194658	Akap7	protein_coding
chr13	14090735	14091365	1.01909	0.432071	-1.23795	ENSMUST00000160510	2500	Tbce	ENSMUSG00000039233	2723.53	0.367107	0.0809504	4.59104	4.41044e-06	6.08036e-05	Tbce	protein_coding	ENSMUSG00000039233	2861.02	0.266795	0.0901667	2.90994	0.00361494	0.0191459	Tbce	protein_coding
chr1	72893349	72893962	1.18	0.6049	-0.964023	ENSMUST00000155703	-1311	Igfbp2	ENSMUSG00000039323	2367.36	-0.475396	0.0882813	-5.43921	5.35183e-08	1.24269e-06	Igfbp2	protein_coding	ENSMUSG00000039323	3027.27	-0.246261	0.0696285	-3.46142	0.000537324	0.00412119	Igfbp2	protein_coding
chr5	37362729	37363327	0.965458	0.0864143	-3.48187	ENSMUST00000167937	4869	Wfs1	ENSMUSG00000039474	3630.16	0.562688	0.0904309	6.22145	4.92567e-10	1.83268e-08	Wfs1	protein_coding	ENSMUSG00000039474	3427.92	0.581514	0.108394	5.16272	2.43391e-07	6.83498e-06	Wfs1	protein_coding
chr4	151680437	151681020	0.911821	0.345657	-1.39941	ENSMUST00000134242	943	Icmt	ENSMUSG00000039662	2660.16	0.165369	0.05427	3.00829	0.00262724	0.0136085	Icmt	protein_coding	ENSMUSG00000039662	2897.39	0.222188	0.0726162	3.06501	0.00217664	0.012783	Icmt	protein_coding
chr3	122258108	122259316	1.71637	1.12339	-0.611507	ENSMUST00000162884	2847	Fnbp1l	ENSMUSG00000039735	16066.3	-0.412871	0.0579627	-7.08283	1.41241e-12	8.89868e-11	Fnbp1l	protein_coding	ENSMUSG00000039735	13904.7	-0.352715	0.0849071	-3.99134	6.57007e-05	0.00074271	Fnbp1l	protein_coding
chr4	34519605	34521363	2.73546	1.55546	-0.814447	ENSMUST00000145619	2783	Orc3	ENSMUSG00000040044	1835.44	0.443963	0.0643881	6.75387	1.4395e-11	7.39348e-10	Orc3	protein_coding	ENSMUSG00000040044	2298.94	0.252869	0.0784893	3.03087	0.00243848	0.0139697	Orc3	protein_coding
chr1	164229218	164230909	4.77365	3.0245	-0.658397	ENSMUST00000159763	-3452	Dnm3	ENSMUSG00000040265	7000.65	0.193832	0.0717564	2.67318	0.0075135	0.0318271	Dnm3	protein_coding	ENSMUSG00000040265	11161.4	0.335812	0.105257	3.30703	0.000942906	0.00652934	Dnm3	protein_coding
chr9	65530596	65532347	3.05728	1.90111	-0.685405	ENSMUST00000128664	-3266	Oaz2	ENSMUSG00000040652	2417.51	0.139914	0.0554886	2.51235	0.0119931	0.0456466	Oaz2	protein_coding	ENSMUSG00000040652	2694.48	0.171007	0.0611032	2.71179	0.006692	0.031116	Oaz2	protein_coding
chr7	25319308	25320255	1.50182	0.691314	-1.1193	ENSMUST00000049020	3643	Irgq	ENSMUSG00000041037	6171.08	-0.469374	0.0587318	-7.82875	4.92747e-15	4.85073e-13	Irgq	protein_coding	ENSMUSG00000041037	4697.24	-0.279867	0.0843121	-2.8649	0.00417146	0.0215031	Irgq	protein_coding
chr6	119127806	119129046	1.77001	0.950557	-0.896909	ENSMUST00000073909	2502	Dcp1b	ENSMUSG00000041477	866.272	0.238907	0.0827212	2.8738	0.00405562	0.0193723	Dcp1b	protein_coding	ENSMUSG00000041477	1031.15	0.277996	0.0750791	3.53603	0.000406188	0.00331297	Dcp1b	protein_coding
chr14	123294062	123294816	1.18	0.259243	-2.18642	ENSMUST00000161322	-3134	A2ld1	ENSMUSG00000041625	447.143	0.69115	0.0949895	7.04966	1.79357e-12	1.11882e-10	Ggact	protein_coding	ENSMUSG00000041625	638.217	0.738637	0.0918274	7.46209	8.51623e-14	1.20917e-11	Ggact	protein_coding
chr7	146056989	146058879	2.52092	0.864143	-1.54461	ENSMUST00000172764	-1214	Ppp2r2d	ENSMUSG00000041769	2953.84	-0.30169	0.0646555	-4.61685	3.89614e-06	5.44162e-05	Ppp2r2d	protein_coding	ENSMUSG00000041769	3208.82	-0.329584	0.0782112	-4.12049	3.78065e-05	0.000471201	Ppp2r2d	protein_coding
chr13	98008680	98015064	51.4911	32.4918	-0.664248	ENSMUST00000041623	0	Enc1	ENSMUSG00000041773	24220.2	-0.23261	0.0730435	-3.10509	0.00190224	0.0104276	Enc1	protein_coding	ENSMUSG00000041773	14415.9	-0.344829	0.0958424	-3.19428	0.00140178	0.00902058	Enc1	protein_coding
chr2	71354804	71355839	1.77001	1.12339	-0.655901	ENSMUST00000148164	1337	Metap1d	ENSMUSG00000041921	1239.57	0.414201	0.0695653	5.86	4.62868e-09	1.41564e-07	Metap1d	protein_coding	ENSMUSG00000041921	1480.27	0.371688	0.0751216	4.6464	3.3777e-06	6.25103e-05	Metap1d	protein_coding
chr11	23489706	23490659	1.50182	0.691314	-1.1193	ENSMUST00000123909	4751	0610010F05Rik	ENSMUSG00000042208	3670.37	-0.602485	0.0673093	-8.83999	9.57311e-19	1.60125e-16	0610010F05Rik	protein_coding	ENSMUSG00000042208	3552.12	-0.560926	0.0801079	-6.74989	1.47955e-11	1.33975e-09	0610010F05Rik	protein_coding
chr11	60642255	60643039	1.18	0.518486	-1.18642	ENSMUST00000042281	-1094	Dhrs7b	ENSMUSG00000042569	790.418	0.346306	0.0823486	4.0628	4.84884e-05	0.00048312	Dhrs7b	protein_coding	ENSMUSG00000042569	774.341	0.367318	0.0830457	4.0832	4.44189e-05	0.000540705	Dhrs7b	protein_coding
chr9	45702439	45703067	0.965458	0.518486	-0.896909	ENSMUST00000160469	3452	Rnf214	ENSMUSG00000042790	3016.02	0.179886	0.0696136	2.54504	0.0109264	0.042564	Rnf214	protein_coding	ENSMUSG00000042790	3496.16	0.319041	0.0697452	4.55066	5.34769e-06	9.17012e-05	Rnf214	protein_coding
chr18	33620497	33625202	22.3664	14.5176	-0.623533	ENSMUST00000051087	0	D0H4S114	ENSMUSG00000042834	21002.5	-0.589922	0.0971712	-6.01135	1.83982e-09	6.17201e-08	Nrep	protein_coding	ENSMUSG00000042834	14842.3	-0.614126	0.0865791	-6.85707	7.02849e-12	6.85393e-10	Nrep	protein_coding
chr11	97489246	97489887	0.965458	0.518486	-0.896909	ENSMUST00000052281	1144	E130012A19Rik	ENSMUSG00000043439	890.352	0.910135	0.108862	8.09231	5.85438e-16	6.66588e-14	Epop	protein_coding	ENSMUSG00000043439	315.05	0.716201	0.119623	5.60951	2.02896e-08	8.02233e-07	Epop	protein_coding
chrX	133402152	133403348	2.62819	1.46904	-0.839193	ENSMUST00000058814	0	Rab9b	ENSMUSG00000043463	1230.83	-0.409382	0.0799956	-5.0371	4.7263e-07	8.68142e-06	Rab9b	protein_coding	ENSMUSG00000043463	1792.27	-0.313923	0.101089	-2.80005	0.00510942	0.0251615	Rab9b	protein_coding
chr9	96753674	96754622	1.82364	0.864143	-1.07748	ENSMUST00000135834	364	Acpl2	ENSMUSG00000043587	466.297	0.31151	0.0916455	3.3695	0.000753057	0.00487548	Pxylp1	protein_coding	ENSMUSG00000043587	523.46	0.390657	0.101041	3.78401	0.000154324	0.00149098	Pxylp1	protein_coding
chr2	158198462	158199506	1.77001	0.691314	-1.35634	ENSMUST00000109488	-1868	Snhg11	ENSMUSG00000044349	95506.3	-0.454044	0.0506235	-8.84182	9.41738e-19	1.58927e-16	Snhg11	protein_coding	ENSMUSG00000044349	122978	-0.416723	0.0662696	-6.0964	1.08483e-09	6.17102e-08	Snhg11	protein_coding
chr3	124025383	124026648	2.41364	1.46904	-0.716337	ENSMUST00000058994	1430	Tram1l1	ENSMUSG00000044528	1457.67	0.20924	0.064189	3.23052	0.00123566	0.00730533	Tram1l1	protein_coding	ENSMUSG00000044528	2048.82	0.191725	0.0663922	2.83432	0.0045923	0.0231287	Tram1l1	protein_coding
chr1	163067707	163068313	0.911821	0.345657	-1.39941	ENSMUST00000125018	-4509	Ankrd45	ENSMUSG00000044835	2176.59	-0.397197	0.0650227	-6.03891	1.55157e-09	5.33205e-08	Ankrd45	protein_coding	ENSMUSG00000044835	1549.58	-0.32156	0.110993	-2.62471	0.00867223	0.038244	Ankrd45	protein_coding
chr13	34214858	34219716	23.6001	13.3942	-0.817182	ENSMUST00000075774	2508	Tubb2b	ENSMUSG00000045136	10888.2	-0.804571	0.160669	-4.93198	8.14005e-07	1.388e-05	Tubb2b	protein_coding	ENSMUSG00000045136	9401.9	-0.795221	0.0865283	-8.69086	3.59712e-18	1.12003e-15	Tubb2b	protein_coding
chr1	173289652	173292437	8.42094	2.59243	-1.69968	ENSMUST00000061878	0	Klhdc9	ENSMUSG00000045259	137.515	0.581427	0.132275	4.09361	4.24708e-05	0.000430193	Klhdc9	protein_coding	ENSMUSG00000045259	165.401	0.727031	0.136821	4.85662	1.19407e-06	2.63586e-05	Klhdc9	protein_coding
chr17	36404323	36404971	1.07273	0.518486	-1.04891	ENSMUST00000174197	670	Trim39	ENSMUSG00000045409	2024.07	0.213472	0.0571425	3.72229	0.000197424	0.0016091	Trim39	protein_coding	ENSMUSG00000045409	2488.24	0.297303	0.0626149	4.60626	4.09973e-06	7.33999e-05	Trim39	protein_coding
chr18	37467145	37467958	1.71637	0.777729	-1.14202	ENSMUST00000056712	38	Pcdhb4	ENSMUSG00000045689	133.158	-0.434306	0.143823	-2.9345	0.00334086	0.016526	Pcdhb4	protein_coding	ENSMUSG00000045689	123.849	-0.48578	0.142278	-2.98047	0.00287808	0.0159178	Pcdhb4	protein_coding
chr15	25340336	25346898	30.9483	17.6285	-0.811949	ENSMUST00000058845	0	Basp1	ENSMUSG00000045763	39943.3	-0.246111	0.0703448	-3.43165	0.000599915	0.00404242	Basp1	protein_coding	ENSMUSG00000045763	30250.5	-0.204625	0.0658303	-3.04801	0.00230361	0.0133784	Basp1	protein_coding
chr16	31423163	31424000	1.18	0.518486	-1.18642	ENSMUST00000089759	799	Bdh1	ENSMUSG00000046598	6877.04	-0.546783	0.0613876	-8.81739	1.17156e-18	1.94242e-16	Bdh1	protein_coding	ENSMUSG00000046598	5293.24	-0.472841	0.076523	-5.83384	5.41676e-09	2.55004e-07	Bdh1	protein_coding
chr10	43294934	43296318	1.93092	0.691314	-1.48187	ENSMUST00000058714	-2657	Cd24a	ENSMUSG00000047139	4404.79	-1.35347	0.099064	-13.506	1.44175e-41	2.09619e-38	Cd24a	protein_coding	ENSMUSG00000047139	1893.09	-0.804926	0.125204	-6.11558	9.62043e-10	5.59814e-08	Cd24a	protein_coding
chr16	42275797	42278168	4.61274	1.8147	-1.34589	ENSMUST00000125187	0	Gap43	ENSMUSG00000047261	21690.2	-0.926957	0.0798961	-11.4188	3.36849e-30	2.35807e-27	Gap43	protein_coding	ENSMUSG00000047261	22136.7	-0.728737	0.0604382	-11.6438	2.4681e-31	6.2577e-28	Gap43	protein_coding
chr19	7183767	7184387	1.01909	0.6049	-0.752519	ENSMUST00000113383	-3549	Flrt1	ENSMUSG00000047787	973.008	0.24737	0.0893514	2.71485	0.00663052	0.0287505	Flrt1	protein_coding	ENSMUSG00000047787	947.758	0.355161	0.0955266	3.69327	0.000221387	0.00202014	Flrt1	protein_coding
chr19	40798936	40800232	2.09183	0.950557	-1.13792	ENSMUST00000127268	-308	Entpd1	ENSMUSG00000048120	706.457	-0.320732	0.0804804	-3.95812	7.55425e-05	0.000707897	Entpd1	protein_coding	ENSMUSG00000048120	689.058	-0.311218	0.102847	-2.82335	0.00475254	0.0237734	Entpd1	protein_coding
chr8	108429278	108430214	1.44819	0.864143	-0.744906	ENSMUST00000049699	4939	Pskh1	ENSMUSG00000048310	410.437	0.238595	0.0931067	2.49693	0.0125273	0.0472799	Pskh1	protein_coding	ENSMUSG00000048310	516.747	0.457288	0.0886472	4.93418	8.04885e-07	1.89058e-05	Pskh1	protein_coding
chr10	79851756	79852390	0.911821	0.432071	-1.07748	ENSMUST00000105350	-1353	Mex3d	ENSMUSG00000048696	850.347	-0.47464	0.0991233	-4.74674	2.06718e-06	3.1586e-05	Mex3d	protein_coding	ENSMUSG00000048696	755.599	-0.402811	0.0973962	-3.84391	0.000121087	0.00122444	Mex3d	protein_coding
chr14	68319671	68320253	0.911821	0.345657	-1.39941	ENSMUST00000130922	-3634	Cdca2	ENSMUSG00000048922	82.9438	-0.524911	0.154054	-3.42887	0.000606094	0.00407244	Cdca2	protein_coding	ENSMUSG00000048922	106.027	-0.758864	0.151371	-4.60978	4.03098e-06	7.24842e-05	Cdca2	protein_coding
chr7	146800996	146803663	4.55911	2.33319	-0.96645	ENSMUST00000093991	0	E030019B06Rik	ENSMUSG00000049571	266.766	0.559397	0.137947	3.78478	0.000153846	0.00129641	Cfap46	protein_coding	ENSMUSG00000049571	844.069	0.538294	0.0983975	5.09104	3.56104e-07	9.37706e-06	Cfap46	protein_coding
chr2	43916474	43917001	0.911821	0.259243	-1.81445	ENSMUST00000128630	-3560	Arhgap15	ENSMUSG00000049744	417.119	0.284294	0.106879	2.55481	0.0106245	0.0416282	Arhgap15	protein_coding	ENSMUSG00000049744	153.033	-0.5	0.165603	-2.60251	0.00925433	0.0402761	Arhgap15	protein_coding
chrX	163643864	163648323	27.9983	15.2953	-0.872247	ENSMUST00000112175	0	Tmsb4x	ENSMUSG00000049775	24857.7	-0.395512	0.0831041	-4.73556	2.18452e-06	3.32177e-05	Tmsb4x	protein_coding	ENSMUSG00000049775	22061.8	-0.655242	0.101416	-6.11641	9.57061e-10	5.58747e-08	Tmsb4x	protein_coding
chr12	70679698	70680436	1.07273	0.691314	-0.633875	ENSMUST00000058639	3580	Mettl21d	ENSMUSG00000049882	572.333	-0.256096	0.0965188	-2.67935	0.00737661	0.0313175	Vcpkmt	protein_coding	ENSMUSG00000049882	523.904	-0.338865	0.0893375	-3.64276	0.000269733	0.00236406	Vcpkmt	protein_coding
chr16	65105044	65106079	1.6091	0.864143	-0.896909	ENSMUST00000063076	0	Htr1f	ENSMUSG00000050783	82.276	-0.52125	0.172348	-3.05637	0.00224036	0.0119788	Htr1f	protein_coding	ENSMUSG00000050783	46.081	-0.783499	0.200295	-3.33372	0.000856932	0.00601853	Htr1f	protein_coding
chr15	37718397	37719015	0.965458	0.518486	-0.896909	ENSMUST00000168992	2741	Ncald	ENSMUSG00000051359	21602.8	-0.275087	0.0573989	-4.77247	1.81979e-06	2.82164e-05	Ncald	protein_coding	ENSMUSG00000051359	17016.1	-0.294503	0.0713291	-3.94839	7.86788e-05	0.000863035	Ncald	protein_coding
chr10	38841215	38842044	1.34091	0.691314	-0.955803	ENSMUST00000136546	77	1700025K23Rik	ENSMUSG00000051736	696.06	0.683443	0.0903468	7.47655	7.6301e-14	5.95936e-12	Fam229b	protein_coding	ENSMUSG00000051736	883.657	0.538242	0.0797692	6.39144	1.64336e-10	1.12611e-08	Fam229b	protein_coding
chr6	79968380	79971169	10.2446	4.92561	-1.05649	ENSMUST00000074662	0	Lrrtm4	ENSMUSG00000052581	1946.78	-0.250299	0.0615927	-4.02259	5.75613e-05	0.000562547	Lrrtm4	protein_coding	ENSMUSG00000052581	1603.59	-0.304322	0.0726888	-3.97115	7.15264e-05	0.0007944	Lrrtm4	protein_coding
chr3	135548305	135548961	1.01909	0.345657	-1.55987	ENSMUST00000133810	1183	Slc39a8	ENSMUSG00000053897	587.407	-0.401436	0.0930331	-4.24789	2.15795e-05	0.00024235	Slc39a8	protein_coding	ENSMUSG00000053897	613.301	-0.395481	0.0937607	-3.88024	0.000104355	0.0010812	Slc39a8	protein_coding
chr15	91990785	91995535	19.2555	12.098	-0.670503	ENSMUST00000068378	0	Cntn1	ENSMUSG00000055022	26288.8	-0.306622	0.0593177	-5.16036	2.46469e-07	4.86275e-06	Cntn1	protein_coding	ENSMUSG00000055022	28157.3	-0.239272	0.0800694	-2.80642	0.00500958	0.0247936	Cntn1	protein_coding
chr1	181178870	181179564	1.12637	0.259243	-2.1193	ENSMUST00000068437	0	Smyd3	ENSMUSG00000055067	1474.59	0.323376	0.0757091	4.16771	3.07676e-05	0.000327572	Smyd3	protein_coding	ENSMUSG00000055067	1740.67	0.391935	0.0701636	5.49363	3.93753e-08	1.39241e-06	Smyd3	protein_coding
chr7	135892204	135893178	1.82364	0.950557	-0.939978	ENSMUST00000042942	3822	Sec23ip	ENSMUSG00000055319	2198.52	0.18685	0.0645536	2.84637	0.00442212	0.0208435	Sec23ip	protein_coding	ENSMUSG00000055319	2480.82	0.179779	0.0699084	2.55838	0.0105162	0.0442785	Sec23ip	protein_coding
chr3	157688759	157689885	1.77001	0.950557	-0.896909	ENSMUST00000152274	-2374	Srsf11	ENSMUSG00000055436	10884.3	0.355263	0.0583319	6.0465	1.48026e-09	5.10553e-08	Srsf11	protein_coding	ENSMUSG00000055436	11839.1	0.334735	0.0602623	5.3154	1.06425e-07	3.25099e-06	Srsf11	protein_coding
chr10	80167613	80168221	0.965458	0.6049	-0.674516	ENSMUST00000095426	2177	Izumo4	ENSMUSG00000055862	1111.98	-0.56527	0.0940013	-5.88089	4.08059e-09	1.26646e-07	Izumo4	protein_coding	ENSMUSG00000055862	1096.63	-0.441443	0.0804422	-5.41201	6.23215e-08	2.0483e-06	Izumo4	protein_coding
chr11	58761322	58764392	14.16	8.64143	-0.712484	ENSMUST00000078267	0	Hist3h2ba	ENSMUSG00000056895	425.018	-0.514279	0.0984172	-5.15603	2.52241e-07	4.96109e-06	Hist3h2ba	protein_coding	ENSMUSG00000056895	350.909	-0.60387	0.111727	-5.25472	1.48248e-07	4.34057e-06	Hist3h2ba	protein_coding
chr6	113655338	113656341	1.50182	0.864143	-0.797373	ENSMUST00000153661	529	Tatdn2	ENSMUSG00000056952	1884.87	-0.288921	0.0666838	-4.31313	1.60963e-05	0.000188382	Tatdn2	protein_coding	ENSMUSG00000056952	1732.62	-0.272831	0.0660308	-4.01354	5.98156e-05	0.000685793	Tatdn2	protein_coding
chr5	93526093	93526953	1.6091	0.777729	-1.04891	ENSMUST00000074733	3612	2011-09-01	ENSMUSG00000058013	8932.37	-0.165924	0.0483986	-3.36589	0.000762982	0.00493198	Sept11	protein_coding	ENSMUSG00000058013	6070.87	-0.444475	0.0763859	-5.53044	3.19424e-08	1.18107e-06	Sept11	protein_coding
chrX	10056376	10057420	1.66273	0.6049	-1.45879	ENSMUST00000149982	-4864	Tspan7	ENSMUSG00000058254	28090.1	-0.257235	0.0673545	-3.72514	0.00019521	0.00159588	Tspan7	protein_coding	ENSMUSG00000058254	22205.6	-0.455734	0.0754953	-5.73114	9.97591e-09	4.31835e-07	Tspan7	protein_coding
chr7	151012111	151012821	1.01909	0.432071	-1.23795	ENSMUST00000124340	-2710	Dhcr7	ENSMUSG00000058454	2182.37	-0.371344	0.071493	-5.15378	2.55286e-07	5.01056e-06	Dhcr7	protein_coding	ENSMUSG00000058454	2159.76	-0.32715	0.0801672	-3.75862	0.000170855	0.00162592	Dhcr7	protein_coding
chr11	98617294	98618246	1.23364	0.777729	-0.665583	ENSMUST00000124072	2396	Thra	ENSMUSG00000058756	41208.4	-0.179708	0.0644548	-2.77611	0.00550134	0.0248283	Thra	protein_coding	ENSMUSG00000058756	28488.7	-0.323003	0.0793093	-3.93318	8.3829e-05	0.000907746	Thra	protein_coding
chr6	96062740	96063947	2.14546	1.12339	-0.933435	ENSMUST00000125951	0	Fam19a1	ENSMUSG00000059187	1876.56	-0.297815	0.0877139	-3.27898	0.00104183	0.00634599	Fam19a1	protein_coding	ENSMUSG00000059187	1211	-0.616042	0.101088	-5.62092	1.89947e-08	7.59273e-07	Fam19a1	protein_coding
chr15	76473739	76474381	1.01909	0.6049	-0.752519	ENSMUST00000168185	-3352	Tonsl	ENSMUSG00000059323	309.798	-0.441891	0.107189	-4.06537	4.79554e-05	0.000479326	Vps28	protein_coding	ENSMUSG00000059323	436.923	-0.391088	0.115326	-2.8302	0.00465183	0.0233618	Vps28	protein_coding
chr5	145305799	145309941	15.0719	9.24633	-0.704906	ENSMUST00000071782	0	Nptx2	ENSMUSG00000059991	1374.77	0.25791	0.106249	2.52549	0.0115537	0.0444126	Nptx2	protein_coding	ENSMUSG00000059991	1515.96	0.531798	0.0757856	6.66989	2.55989e-11	2.18427e-09	Nptx2	protein_coding
chr14	34060338	34061524	1.71637	1.03697	-0.726984	ENSMUST00000131086	-2052	Arhgap22	ENSMUSG00000063506	264.922	-0.725682	0.12105	-5.94313	2.79626e-09	9.11242e-08	Arhgap22	protein_coding	ENSMUSG00000063506	281.645	-0.3131	0.130668	-2.70175	0.0068976	0.0318053	Arhgap22	protein_coding
chr3	89011756	89012388	0.965458	0.432071	-1.15994	ENSMUST00000174218	1199	Mtx1	ENSMUSG00000064068	1070.97	0.25306	0.0708128	3.57332	0.000352477	0.00260648	Mtx1	protein_coding	ENSMUSG00000064068	1095.24	0.239961	0.0831121	2.71165	0.00669497	0.0311162	Mtx1	protein_coding
chr12	9025275	9026075	1.12637	0.345657	-1.70426	ENSMUST00000159735	-3331	Wdr35	ENSMUSG00000066643	2477.2	0.243806	0.0686823	3.49746	0.000469708	0.0032979	Wdr35	protein_coding	ENSMUSG00000066643	2645.24	0.338019	0.0694574	4.83784	1.31259e-06	2.84442e-05	Wdr35	protein_coding
chr5	114814494	114815465	1.55546	0.691314	-1.16993	ENSMUST00000125230	1072	Gm13789	ENSMUSG00000066952	86.6359	1.22664	0.169232	6.80097	1.03916e-11	5.48638e-10	Myo1h	protein_coding	ENSMUSG00000066952	98.268	0.495278	0.160261	2.78201	0.00540242	0.0263123	Myo1h	protein_coding
chr19	38335924	38336727	1.07273	0.518486	-1.04891	ENSMUST00000134832	-2545	Lgi1	ENSMUSG00000067242	3377.17	-0.396413	0.0593734	-6.55995	5.38241e-11	2.47463e-09	Lgi1	protein_coding	ENSMUSG00000067242	2671.08	-0.675063	0.0742146	-8.64581	5.34257e-18	1.58033e-15	Lgi1	protein_coding
chr2	130478267	130478948	1.12637	0.518486	-1.1193	ENSMUST00000153271	1566	Ddrgk1	ENSMUSG00000068290	2073.5	0.483874	0.0629475	7.575	3.59138e-14	3.11379e-12	Ddrgk1	protein_coding	ENSMUSG00000068290	2634.06	0.481996	0.0624317	7.42587	1.12044e-13	1.55357e-11	Ddrgk1	protein_coding
chr7	3288697	3290410	3.43274	2.07394	-0.726984	ENSMUST00000164553	0	Myadm	ENSMUSG00000068566	3401.69	-0.385439	0.0872487	-4.07625	4.57671e-05	0.000459397	Myadm	protein_coding	ENSMUSG00000068566	2963.42	-0.431958	0.100071	-3.68913	0.000225024	0.00204596	Myadm	protein_coding
chr10	114801838	114802662	1.18	0.6049	-0.964023	ENSMUST00000092170	-2521	Tmem19	ENSMUSG00000069520	1853.61	0.285999	0.0583654	4.84942	1.23822e-06	2.00889e-05	Tmem19	protein_coding	ENSMUSG00000069520	1818.14	0.21501	0.0621796	3.34754	0.000815329	0.00577663	Tmem19	protein_coding
chr11	117339565	117341492	3.16456	1.8147	-0.802272	ENSMUST00000092394	-4190	Gm11733	ENSMUSG00000069588	23.4072	0.633817	0.192934	3.30191	0.000960302	0.00593562	Gm11733	protein_coding	ENSMUSG00000069588	30.0415	0.703202	0.209139	2.76542	0.00568487	0.0273948	Gm11733	protein_coding
chr10	32614167	32614905	1.28728	0.6049	-1.08955	ENSMUST00000092602	-3900	Nkain2	ENSMUSG00000069670	3825.91	-0.239731	0.0579231	-4.0941	4.23814e-05	0.000429979	Nkain2	protein_coding	ENSMUSG00000069670	2655.57	-0.636472	0.10879	-5.32671	1.0001e-07	3.08155e-06	Nkain2	protein_coding
chr11	75995540	75996106	0.911821	0.518486	-0.814447	ENSMUST00000129853	2369	Fam57a	ENSMUSG00000069808	904.436	-0.438292	0.0739117	-5.83027	5.53376e-09	1.65496e-07	Fam57a	protein_coding	ENSMUSG00000069808	928.124	-0.526817	0.082647	-6.00495	1.91392e-09	1.01398e-07	Fam57a	protein_coding
chr17	29173872	29175313	2.95001	1.46904	-1.00584	ENSMUST00000144551	550	Srsf3	ENSMUSG00000071172	4092.94	-0.17848	0.0678008	-2.59844	0.00936489	0.0378558	Srsf3	protein_coding	ENSMUSG00000071172	4208.29	-0.224731	0.072252	-3.00159	0.00268571	0.0150878	Srsf3	protein_coding
chr19	8920853	8921471	1.01909	0.6049	-0.752519	ENSMUST00000159653	175	Bscl2	ENSMUSG00000071657	2365.85	-0.426184	0.0625294	-6.66694	2.61193e-11	1.27237e-09	Bscl2	protein_coding	ENSMUSG00000071657	2532	-0.24435	0.0782568	-2.91468	0.00356053	0.0189142	Bscl2	protein_coding
chr15	98781081	98781904	1.55546	0.864143	-0.847999	ENSMUST00000134214	2070	Tuba1a	ENSMUSG00000072235	15331.9	-0.889742	0.0881269	-9.82663	8.64633e-23	2.31405e-20	Tuba1a	protein_coding	ENSMUSG00000072235	12473.9	-0.780871	0.0903522	-8.05942	7.66565e-16	1.67963e-13	Tuba1a	protein_coding
chr11	59317108	59317762	1.12637	0.691314	-0.704264	ENSMUST00000138763	-1402	4933439C10Rik	ENSMUSG00000072893	1780.15	0.521394	0.0868088	5.87284	4.28392e-09	1.32014e-07	4933439C10Rik	processed_transcript	ENSMUSG00000072893	1298.08	0.345639	0.0886547	3.62849	0.000285081	0.00247535	4933439C10Rik	processed_transcript
chr5	5573351	5574651	2.89637	1.72829	-0.744906	ENSMUST00000101627	0	Gm8773	ENSMUSG00000073234	33.5707	-0.826945	0.19267	-4.23655	2.26983e-05	0.000252662	Gm8773	protein_coding	ENSMUSG00000073234	22.1302	-0.885093	0.211571	-4.23659	2.26941e-05	0.000305364	Gm8773	protein_coding
chr4	130122698	130123418	1.18	0.6049	-0.964023	ENSMUST00000105993	-2287	Nkain1	ENSMUSG00000078532	812.017	-0.480675	0.0906548	-5.22756	1.71766e-07	3.50599e-06	Nkain1	protein_coding	ENSMUSG00000078532	764.157	-0.316882	0.112119	-2.69051	0.0071343	0.0327436	Nkain1	protein_coding
chr4	43699732	43700473	1.07273	0.432071	-1.31195	ENSMUST00000154112	-2089	Tmem8b	ENSMUSG00000078716	4143.53	0.234954	0.0546748	4.24066	2.22862e-05	0.000248955	Tmem8b	protein_coding	ENSMUSG00000078716	3161.08	0.242333	0.0757298	3.21615	0.00129925	0.00847446	Tmem8b	protein_coding
chr5	125347154	125348648	2.52092	1.46904	-0.779072	ENSMUST00000130616	3747	Zfp664	ENSMUSG00000079215	5249.67	0.313691	0.0585868	5.3063	1.11874e-07	2.38391e-06	Zfp664	protein_coding	ENSMUSG00000079215	6332.95	0.264661	0.0549871	4.68546	2.79332e-06	5.33648e-05	Zfp664	protein_coding
chr6	72904641	72909749	28.8028	18.5791	-0.632532	ENSMUST00000144337	0	Tmsb10	ENSMUSG00000079523	1991.53	-1.10271	0.0866909	-12.6441	1.20614e-36	1.19985e-33	Tmsb10	protein_coding	ENSMUSG00000079523	2327.6	-1.02205	0.0897147	-10.9449	7.03104e-28	1.24787e-24	Tmsb10	protein_coding
chr19	4852771	4853407	0.858185	0.518486	-0.726984	ENSMUST00000119694	-1722	Ctsf	ENSMUSG00000083282	1969.81	0.214264	0.0596427	3.52757	0.000419399	0.00300951	Ctsf	protein_coding	ENSMUSG00000083282	2154.73	0.269129	0.0817975	3.28688	0.00101305	0.00692853	Ctsf	protein_coding

## Sheet: E-AcH4 depleted - RNAseq
ChIP-seq									RNA-seq cortex									RNA-seq striatum
chr	start	end	WT	KO	lfc	NearestTSS	DistnaceToTSS	GeneName		baseMean	log2FoldChange	lfcSE	stat	pvalue	padj	symbol	biotype		baseMean	log2FoldChange	lfcSE	stat	pvalue	padj	symbol	biotype
chr14	124022007	124022915	1.89903	1.01724	-0.900594	ENSMUST00000000201	3452	Nalcn	ENSMUSG00000000197	6756.81	0.219326	0.0587156	3.68264	0.000230833	0.00183164	Nalcn	protein_coding	ENSMUSG00000000197	8383.87	0.23072	0.0643145	3.5642	0.000364972	0.00302334	Nalcn	protein_coding
chr4	129252159	129253103	1.81271	0.847703	-1.09651	ENSMUST00000102596	-1275	Lck	ENSMUSG00000000409	279.544	-0.447321	0.104234	-4.27256	1.93244e-05	0.000220429	Lck	protein_coding	ENSMUSG00000000409	234.926	-0.458994	0.146362	-2.98463	0.00283918	0.0157502	Lck	protein_coding
chrX	45311844	45312405	0.949513	0.169541	-2.48556	ENSMUST00000115013	-1061	Ocrl	ENSMUSG00000001173	3992.96	0.236047	0.067742	3.4619	0.000536382	0.00367991	Ocrl	protein_coding	ENSMUSG00000001173	5472.07	0.284613	0.0691386	3.96007	7.49265e-05	0.000829049	Ocrl	protein_coding
chr2	164595355	164596288	3.19382	1.52587	-1.06565	ENSMUST00000001439	0	Ube2c	ENSMUSG00000001403	106.809	-0.704953	0.145931	-4.70184	2.57821e-06	3.83172e-05	Ube2c	protein_coding	ENSMUSG00000001403	147.759	-0.651327	0.152158	-4.00899	6.09803e-05	0.000698244	Ube2c	protein_coding
chr6	28797434	28798127	1.38111	0.678163	-1.02613	ENSMUST00000166136	-780	Snd1	ENSMUSG00000001424	3272.38	0.200414	0.0771664	2.66845	0.00762012	0.0321635	Snd1	protein_coding	ENSMUSG00000001424	2898.95	0.256256	0.0822041	3.18339	0.00145561	0.00930625	Snd1	protein_coding
chr6	113266447	113266999	1.03583	0.508622	-1.02613	ENSMUST00000124530	-153	Brpf1	ENSMUSG00000001632	1494.38	0.229031	0.066812	3.3868	0.000707124	0.0046327	Brpf1	protein_coding	ENSMUSG00000001632	1391.25	0.200231	0.0722121	2.64772	0.00810367	0.0362277	Brpf1	protein_coding
chr6	29662014	29662685	1.46743	0.678163	-1.11359	ENSMUST00000137925	3988	Tspan33	ENSMUSG00000001763	845.811	0.614972	0.0804226	7.49453	6.65371e-14	5.262e-12	Tspan33	protein_coding	ENSMUSG00000001763	1071.48	0.494801	0.0849979	5.53551	3.10324e-08	1.15222e-06	Tspan33	protein_coding
chr12	32003325	32003864	1.12215	0.508622	-1.1416	ENSMUST00000172134	-4522	Lamb1	ENSMUSG00000002900	1546.43	-0.284915	0.0880996	-2.98048	0.002878	0.0146367	Lamb1	protein_coding	ENSMUSG00000002900	1223.51	-0.351756	0.106542	-2.85826	0.00425968	0.0218227	Lamb1	protein_coding
chr8	109857806	109858461	1.20847	0.169541	-2.83348	ENSMUST00000148006	-3947	Nfat5	ENSMUSG00000003847	5484.9	0.299873	0.0638654	4.71796	2.38227e-06	3.57927e-05	Nfat5	protein_coding	ENSMUSG00000003847	6959.79	0.202199	0.0598409	3.30966	0.000934079	0.0064758	Nfat5	protein_coding
chr8	109924423	109925024	1.46743	0.508622	-1.52863	ENSMUST00000003947	2083	Nqo1	ENSMUSG00000003849	139.051	0.555548	0.130698	4.14271	3.43226e-05	0.00036027	Nqo1	protein_coding	ENSMUSG00000003849	245.65	0.712209	0.115697	5.76046	8.38874e-09	3.68523e-07	Nqo1	protein_coding
chr2	24492790	24494153	3.28014	1.35633	-1.27405	ENSMUST00000125798	0	Cacna1b	ENSMUSG00000004113	7269.93	-0.396622	0.0799139	-4.82161	1.42404e-06	2.27138e-05	Cacna1b	protein_coding	ENSMUSG00000004113	6713.79	-0.247173	0.0729768	-3.1532	0.00161493	0.0100783	Cacna1b	protein_coding
chr10	28935936	28936539	1.20847	0.339081	-1.83348	ENSMUST00000092627	4489	9330159F19Rik	ENSMUSG00000004360	3960.73	-0.247701	0.0586434	-4.07345	4.63217e-05	0.00046447	9330159F19Rik	protein_coding	ENSMUSG00000004360	3795.63	-0.346618	0.056618	-5.85749	4.69902e-09	2.29116e-07	9330159F19Rik	protein_coding
chr10	80718583	80719131	0.949513	0.169541	-2.48556	ENSMUST00000117488	-913	Matk	ENSMUSG00000004933	7610.13	-0.576834	0.0769034	-7.38323	1.545e-13	1.12316e-11	Matk	protein_coding	ENSMUSG00000004933	5536.73	-0.817028	0.0859365	-9.07771	1.10885e-19	4.68569e-17	Matk	protein_coding
chr13	83638710	83639266	1.29479	0.169541	-2.93302	ENSMUST00000005722	-3767	Mef2c	ENSMUSG00000005583	49952	-0.234293	0.0653349	-3.58384	0.000338576	0.00251451	Mef2c	protein_coding	ENSMUSG00000005583	8603.93	-0.696926	0.137346	-4.20298	2.63421e-05	0.000346568	Mef2c	protein_coding
chr1	74284113	74284797	1.29479	0.678163	-0.933016	ENSMUST00000113819	991	Arpc2	ENSMUSG00000006304	9091.39	-0.218185	0.0526893	-4.10943	3.96635e-05	0.000406551	Arpc2	protein_coding	ENSMUSG00000006304	6552.42	-0.284255	0.0704181	-3.95298	7.71846e-05	0.00085191	Arpc2	protein_coding
chr11	50200621	50201173	0.949513	0.169541	-2.48556	ENSMUST00000151537	2158	Hnrnph1	ENSMUSG00000007850	11544	-0.28754	0.0564327	-5.00923	5.46478e-07	9.81842e-06	Hnrnph1	protein_coding	ENSMUSG00000007850	12953.2	-0.257823	0.0517401	-4.87767	1.07346e-06	2.42279e-05	Hnrnph1	protein_coding
chr7	28435366	28436461	2.33062	1.01724	-1.19605	ENSMUST00000008088	-2473	Ttc9b	ENSMUSG00000007944	3747.42	-0.370855	0.0944117	-3.8801	0.000104414	0.000937992	Ttc9b	protein_coding	ENSMUSG00000007944	2532.13	-0.613186	0.111847	-5.3139	1.07303e-07	3.27219e-06	Ttc9b	protein_coding
chr12	113852843	113853354	1.03583	0.339081	-1.61109	ENSMUST00000021726	-4904	Adssl1	ENSMUSG00000011148	214.144	0.676356	0.1182	5.5871	2.30893e-08	5.95377e-07	Adssl1	protein_coding	ENSMUSG00000011148	481.329	0.747568	0.133684	5.25449	1.48439e-07	4.34057e-06	Adssl1	protein_coding
chrX	40781800	40782553	1.64007	0.678163	-1.27405	ENSMUST00000125231	0	Odz1	ENSMUSG00000016150	4192.65	-0.376811	0.0803374	-4.67737	2.90576e-06	4.23111e-05	Tenm1	protein_coding	ENSMUSG00000016150	6007.07	-0.382312	0.0647853	-5.54814	2.88719e-08	1.08105e-06	Tenm1	protein_coding
chr11	104138318	104138852	1.03583	0.508622	-1.02613	ENSMUST00000106989	-4843	Mapt	ENSMUSG00000018411	29464	-0.599236	0.0873937	-6.71565	1.87234e-11	9.41199e-10	Mapt	protein_coding	ENSMUSG00000018411	21788.8	-0.419119	0.0785176	-4.95347	7.29016e-07	1.74846e-05	Mapt	protein_coding
chr11	102272405	102272980	1.29479	0.678163	-0.933016	ENSMUST00000124755	-3146	Slc25a39	ENSMUSG00000018677	1958.44	-0.234899	0.0598705	-3.89904	9.65737e-05	0.000877989	Slc25a39	protein_coding	ENSMUSG00000018677	2296.97	-0.180863	0.0683894	-2.53702	0.0111802	0.0463937	Slc25a39	protein_coding
chr10	12806979	12807624	1.12215	0.339081	-1.72657	ENSMUST00000123135	-2873	Plagl1	ENSMUSG00000019817	1657.95	0.294285	0.115195	2.61273	0.00898225	0.0366919	Plagl1	protein_coding	ENSMUSG00000019817	2575.7	0.466752	0.0919946	5.17146	2.32276e-07	6.54355e-06	Plagl1	protein_coding
chr10	19590408	19591196	1.38111	0.508622	-1.44116	ENSMUST00000125942	-929	Pex7	ENSMUSG00000020003	1674.69	0.57862	0.0649788	8.72111	2.75488e-18	4.23333e-16	Pex7	protein_coding	ENSMUSG00000020003	2178.43	0.497887	0.0648079	7.32268	2.43062e-13	3.15973e-11	Pex7	protein_coding
chr10	61120608	61121234	1.20847	0.169541	-2.83348	ENSMUST00000160607	-4202	Ppa1	ENSMUSG00000020089	3098.25	-0.241089	0.0630677	-3.80481	0.000141915	0.00121099	Ppa1	protein_coding	ENSMUSG00000020089	3193.82	-0.182239	0.0576624	-3.0616	0.00220159	0.0128871	Ppa1	protein_coding
chr10	116019388	116020120	1.72639	0.678163	-1.34805	ENSMUST00000020374	-822	Cnot2	ENSMUSG00000020166	2730.65	0.151789	0.0535696	2.83261	0.00461693	0.0215709	Cnot2	protein_coding	ENSMUSG00000020166	2938.68	0.233793	0.0587764	3.88538	0.00010217	0.00106415	Cnot2	protein_coding
chr11	60025448	60026238	1.72639	0.508622	-1.76309	ENSMUST00000144942	-1482	Srebf1	ENSMUSG00000020538	1041.65	0.246109	0.0797885	2.99121	0.00277877	0.0142528	Srebf1	protein_coding	ENSMUSG00000020538	1627.02	0.531517	0.0887763	5.7031	1.17647e-08	4.97574e-07	Srebf1	protein_coding
chr11	109402722	109403233	0.949513	0.339081	-1.48556	ENSMUST00000106696	-1835	Arsg	ENSMUSG00000020604	302.542	0.659906	0.105581	5.913	3.35939e-09	1.07076e-07	Arsg	protein_coding	ENSMUSG00000020604	482.168	0.764415	0.0926278	7.61734	2.58954e-14	4.14046e-12	Arsg	protein_coding
chr11	77275343	77276048	1.29479	0.678163	-0.933016	ENSMUST00000102493	0	Coro6	ENSMUSG00000020836	944.033	-0.756889	0.0904261	-8.08061	6.44431e-16	7.22423e-14	Coro6	protein_coding	ENSMUSG00000020836	1522.94	-0.498328	0.130561	-3.57962	0.0003441	0.00288342	Coro6	protein_coding
chr11	102713204	102713806	1.12215	0.169541	-2.72657	ENSMUST00000141273	-3912	Eftud2	ENSMUSG00000020929	3782.31	0.236948	0.0685243	3.48879	0.000485205	0.00338533	Eftud2	protein_coding	ENSMUSG00000020929	3317.39	0.27334	0.0662897	4.09378	4.24394e-05	0.000518029	Eftud2	protein_coding
chr13	63973885	63974384	1.12215	0.339081	-1.72657	ENSMUST00000162086	124	0610007P08Rik	ENSMUSG00000021470	1354.35	0.463405	0.0813693	5.48992	4.02107e-08	9.69416e-07	Ercc6l2	protein_coding	ENSMUSG00000021470	1827.15	0.389246	0.0750203	5.00445	5.60226e-07	1.39844e-05	Ercc6l2	protein_coding
chr13	97438594	97439166	1.03583	0.508622	-1.02613	ENSMUST00000169966	444	Hmgcr	ENSMUSG00000021670	9959.08	-0.490846	0.0488895	-9.94206	2.73109e-23	7.70452e-21	Hmgcr	protein_coding	ENSMUSG00000021670	7985.89	-0.552366	0.0768093	-6.62671	3.43241e-11	2.79443e-09	Hmgcr	protein_coding
chr13	110720010	110720635	1.12215	0.339081	-1.72657	ENSMUST00000117420	2960	Pde4d	ENSMUSG00000021699	2473.15	-0.207613	0.0581647	-3.59092	0.000329511	0.00245864	Pde4d	protein_coding	ENSMUSG00000021699	2262.22	-0.188772	0.0719908	-2.53958	0.0110987	0.0461365	Pde4d	protein_coding
chr14	66426696	66427435	1.20847	0.508622	-1.24852	ENSMUST00000139644	1629	Pbk	ENSMUSG00000022033	144.959	-0.659486	0.152245	-4.23705	2.26478e-05	0.000252249	Pbk	protein_coding	ENSMUSG00000022033	196.928	-0.798149	0.132804	-5.35669	8.47594e-08	2.63914e-06	Pbk	protein_coding
chr14	66962772	66964155	4.83389	2.20403	-1.13304	ENSMUST00000152093	0	Stmn4	ENSMUSG00000022044	11129.4	-0.839105	0.087124	-9.50524	1.99597e-21	4.49116e-19	Stmn4	protein_coding	ENSMUSG00000022044	8596.72	-0.837399	0.0602001	-13.5	1.56478e-41	1.38858e-37	Stmn4	protein_coding
chr16	45400689	45401186	1.03583	0.169541	-2.61109	ENSMUST00000167355	-265	Cd200	ENSMUSG00000022661	6895.61	-0.530635	0.072781	-7.25186	4.11083e-13	2.82541e-11	Cd200	protein_coding	ENSMUSG00000022661	7155.47	-0.453122	0.0665659	-6.51013	7.5085e-11	5.61795e-09	Cd200	protein_coding
chr16	43941927	43942500	1.38111	0.678163	-1.02613	ENSMUST00000122440	2692	2610015P09Rik	ENSMUSG00000022701	312.174	0.293608	0.111873	2.55753	0.0105417	0.0413894	Ccdc191	protein_coding	ENSMUSG00000022701	340.749	0.480149	0.105024	4.42855	9.48685e-06	0.000148859	Ccdc191	protein_coding
chr17	55584184	55586986	10.9626	5.76438	-0.927347	ENSMUST00000153220	0	St6gal2	ENSMUSG00000024172	4357.13	-0.166041	0.060075	-2.74642	0.00602502	0.026657	St6gal2	protein_coding	ENSMUSG00000024172	2852.91	-0.437349	0.0884026	-4.75782	1.95694e-06	4.00137e-05	St6gal2	protein_coding
chr18	43217024	43220396	9.40881	4.91668	-0.936329	ENSMUST00000025377	0	Ppp2r2b	ENSMUSG00000024500	7728.66	-0.288382	0.0620817	-4.63412	3.58455e-06	5.07503e-05	Ppp2r2b	protein_coding	ENSMUSG00000024500	6134.94	-0.376177	0.0619188	-5.83048	5.52665e-09	2.5949e-07	Ppp2r2b	protein_coding
chr18	43548160	43549149	2.2443	0.678163	-1.72657	ENSMUST00000025379	3883	Dpysl3	ENSMUSG00000024501	24310.3	-1.08031	0.177087	-6.01334	1.81734e-09	6.11202e-08	Dpysl3	protein_coding	ENSMUSG00000024501	16149.7	-1.18934	0.0867885	-12.8528	8.29332e-38	4.90633e-34	Dpysl3	protein_coding
chr18	49912709	49913304	1.20847	0.169541	-2.83348	ENSMUST00000163590	1952	Dtwd2	ENSMUSG00000024505	221.772	0.350662	0.113778	2.94593	0.00321984	0.0160364	Dtwd2	protein_coding	ENSMUSG00000024505	238.309	0.325226	0.11091	2.76453	0.00570048	0.0274477	Dtwd2	protein_coding
chr7	88518983	88519478	1.12215	0.508622	-1.1416	ENSMUST00000151661	-1613	Cpeb1	ENSMUSG00000025586	896.151	-0.247954	0.07771	-2.98911	0.00279792	0.0143199	Cpeb1	protein_coding	ENSMUSG00000025586	1237.73	-0.383737	0.111279	-3.14573	0.00165676	0.0102881	Cpeb1	protein_coding
chr1	99875040	99875698	1.29479	0.508622	-1.34805	ENSMUST00000161567	-1209	Pam	ENSMUSG00000026335	7022.86	0.229309	0.065687	3.47678	0.000507482	0.00351739	Pam	protein_coding	ENSMUSG00000026335	7285.75	0.310298	0.0639813	4.75531	1.98145e-06	4.04216e-05	Pam	protein_coding
chr1	133420145	133420878	1.46743	0.678163	-1.11359	ENSMUST00000097588	3061	Srgap2	ENSMUSG00000026425	6620.47	-0.526792	0.0686739	-7.53743	4.79308e-14	3.93887e-12	Srgap2	protein_coding	ENSMUSG00000026425	6018.63	-0.352116	0.0812511	-4.03328	5.50042e-05	0.000638884	Srgap2	protein_coding
chr1	180251324	180251867	1.03583	0.339081	-1.61109	ENSMUST00000027781	2065	Fam36a	ENSMUSG00000026500	444.687	-0.489654	0.0959683	-4.95772	7.13266e-07	1.23797e-05	Cox20	protein_coding	ENSMUSG00000026500	621.158	-0.498234	0.0896292	-5.29705	1.17691e-07	3.55625e-06	Cox20	protein_coding
chr1	158867966	158868349	0.949513	0.169541	-2.48556	ENSMUST00000171292	1170	Ralgps2	ENSMUSG00000026594	3549.41	-0.206897	0.0663745	-3.0719	0.002127	0.0114668	Ralgps2	protein_coding	ENSMUSG00000026594	3720.96	-0.231913	0.0662179	-3.33132	0.000864339	0.00605857	Ralgps2	protein_coding
chr1	191511262	191512017	1.98535	0.508622	-1.96472	ENSMUST00000165663	0	Cenpf	ENSMUSG00000026605	385.369	-0.463637	0.0988394	-4.6635	3.10875e-06	4.48881e-05	Cenpf	protein_coding	ENSMUSG00000026605	496.314	-0.729107	0.104667	-6.50058	8.00084e-11	5.89207e-09	Cenpf	protein_coding
chr1	190834300	190834859	1.03583	0.508622	-1.02613	ENSMUST00000085678	-2582	Kctd3	ENSMUSG00000026608	5287.39	0.191477	0.0548348	3.46074	0.000538688	0.00369037	Kctd3	protein_coding	ENSMUSG00000026608	4544.45	0.193318	0.0550164	3.47236	0.0005159	0.0039931	Kctd3	protein_coding
chr2	13467627	13468232	1.29479	0.678163	-0.933016	ENSMUST00000124488	-1337	Trdmt1	ENSMUSG00000026723	395.17	0.338715	0.103649	3.09135	0.00199251	0.0108469	Trdmt1	protein_coding	ENSMUSG00000026723	517.312	0.368433	0.0952213	3.4434	0.00057444	0.00435179	Trdmt1	protein_coding
chr2	61883860	61884458	1.20847	0.508622	-1.24852	ENSMUST00000102735	-61	Slc4a10	ENSMUSG00000026904	7538.66	-0.203993	0.0621557	-3.23707	0.00120766	0.0071577	Slc4a10	protein_coding	ENSMUSG00000026904	7488.71	-0.233682	0.0641221	-3.41712	0.000632874	0.00470362	Slc4a10	protein_coding
chr2	122441962	122442721	1.64007	0.847703	-0.952125	ENSMUST00000028624	-4924	Gatm	ENSMUSG00000027199	3973.76	-0.412123	0.0618333	-6.64741	2.98288e-11	1.43459e-09	Gatm	protein_coding	ENSMUSG00000027199	5056.78	-0.338056	0.0750895	-4.33522	1.45613e-05	0.000213405	Gatm	protein_coding
chr2	152675926	152677359	3.28014	1.69541	-0.952125	ENSMUST00000136407	2110	Tpx2	ENSMUSG00000027469	346.773	-0.492295	0.10183	-4.63273	3.60875e-06	5.10165e-05	Tpx2	protein_coding	ENSMUSG00000027469	389.926	-0.588662	0.109014	-4.72868	2.25988e-06	4.50149e-05	Tpx2	protein_coding
chr2	178061818	178062235	0.949513	0.508622	-0.900594	ENSMUST00000141272	-26	Phactr3	ENSMUSG00000027525	6466.27	-0.246012	0.0636329	-3.85188	0.000117215	0.00103382	Phactr3	protein_coding	ENSMUSG00000027525	5388.25	-0.331522	0.0606235	-5.30931	1.10042e-07	3.34996e-06	Phactr3	protein_coding
chr4	14788050	14788604	1.03583	0.339081	-1.61109	ENSMUST00000029875	-2619	Tmem55a	ENSMUSG00000028221	1720.92	-0.257223	0.061916	-4.11563	3.86126e-05	0.000397503	Tmem55a	protein_coding	ENSMUSG00000028221	1980.82	-0.214074	0.0621199	-3.24954	0.00115591	0.00771126	Tmem55a	protein_coding
chr4	6352792	6353313	0.949513	0.339081	-1.48556	ENSMUST00000156078	-1658	Nsmaf	ENSMUSG00000028245	2307.02	0.178315	0.0586159	3.00987	0.00261356	0.01356	Nsmaf	protein_coding	ENSMUSG00000028245	3244.61	0.236082	0.0673474	3.2516	0.00114759	0.00766557	Nsmaf	protein_coding
chr4	68615450	68616403	2.76222	0.678163	-2.02613	ENSMUST00000030036	-20	Dbc1	ENSMUSG00000028351	11488.3	-0.173471	0.0599801	-2.8812	0.00396161	0.0190095	Brinp1	protein_coding	ENSMUSG00000028351	5925.09	-0.266913	0.0581159	-4.45429	8.41718e-06	0.000135438	Brinp1	protein_coding
chr4	129983691	129984317	1.20847	0.339081	-1.83348	ENSMUST00000070532	-1522	Fabp3	ENSMUSG00000028773	1246.37	-0.429388	0.0749336	-5.71254	1.113e-08	3.10737e-07	Fabp3	protein_coding	ENSMUSG00000028773	1008.34	-0.499012	0.088276	-5.5178	3.43261e-08	1.26132e-06	Fabp3	protein_coding
chr4	128644072	128644686	1.12215	0.508622	-1.1416	ENSMUST00000143912	-4387	Adc	ENSMUSG00000028789	919.715	0.560035	0.0817496	6.69456	2.16324e-11	1.08167e-09	Azin2	protein_coding	ENSMUSG00000028789	1015.15	0.509302	0.0800159	6.0995	1.06401e-09	6.07204e-08	Azin2	protein_coding
chr4	134468867	134469512	1.29479	0.508622	-1.34805	ENSMUST00000105863	1419	Tmem50a	ENSMUSG00000028822	2641.12	-0.396444	0.0674595	-5.84517	5.0605e-09	1.52307e-07	Tmem50a	protein_coding	ENSMUSG00000028822	2363.86	-0.360297	0.0729369	-4.81283	1.48806e-06	3.16289e-05	Tmem50a	protein_coding
chr4	126515305	126515890	1.20847	0.339081	-1.83348	ENSMUST00000155341	2784	AU040320	ENSMUSG00000028830	2965.56	0.234476	0.0655127	3.56493	0.000363947	0.00267814	AU040320	protein_coding	ENSMUSG00000028830	2990.32	0.304573	0.072463	4.15859	3.2022e-05	0.000405948	AU040320	protein_coding
chr4	134022775	134026225	17.1776	8.81611	-0.96231	ENSMUST00000105868	0	Stmn1	ENSMUSG00000028832	1671.27	-0.815029	0.0997526	-8.08033	6.45942e-16	7.22423e-14	Stmn1	protein_coding	ENSMUSG00000028832	1095.27	-0.732905	0.0785373	-8.97691	2.7848e-19	1.07445e-16	Stmn1	protein_coding
chr5	24501271	24502355	2.84854	1.01724	-1.48556	ENSMUST00000076306	0	Prkag2	ENSMUSG00000028944	3777.4	-0.325109	0.0551755	-5.82292	5.7828e-09	1.71856e-07	Prkag2	protein_coding	ENSMUSG00000028944	3556.97	-0.318104	0.0776545	-3.95504	7.65225e-05	0.000845655	Prkag2	protein_coding
chr5	24351604	24352048	0.949513	0.169541	-2.48556	ENSMUST00000030787	-3163	Rheb	ENSMUSG00000028945	4294.35	-0.203448	0.0619858	-3.2679	0.00108349	0.00655328	Rheb	protein_coding	ENSMUSG00000028945	4240.51	-0.203725	0.0693626	-2.8475	0.00440641	0.0224266	Rheb	protein_coding
chr5	31015691	31016331	1.12215	0.339081	-1.72657	ENSMUST00000101442	1419	Dpysl5	ENSMUSG00000029168	13562.3	-0.857895	0.10241	-8.19601	2.48502e-16	2.97275e-14	Dpysl5	protein_coding	ENSMUSG00000029168	9989.17	-0.500402	0.0939367	-4.78193	1.73618e-06	3.61663e-05	Dpysl5	protein_coding
chr5	65808799	65809301	0.949513	0.169541	-2.48556	ENSMUST00000125375	4599	Ugdh	ENSMUSG00000029201	1207.73	-0.209616	0.0669756	-3.11379	0.00184699	0.0101927	Ugdh	protein_coding	ENSMUSG00000029201	1497.73	-0.324975	0.0653661	-4.78109	1.74348e-06	3.62333e-05	Ugdh	protein_coding
chr5	123057774	123058368	1.12215	0.169541	-2.72657	ENSMUST00000139590	-4273	Ift81	ENSMUSG00000029469	1710.6	0.395128	0.0662088	5.86943	4.37297e-09	1.34396e-07	Ift81	protein_coding	ENSMUSG00000029469	2056.36	0.41627	0.0843612	4.68765	2.76357e-06	5.29103e-05	Ift81	protein_coding
chr6	17692180	17692735	0.949513	0.339081	-1.48556	ENSMUST00000000674	-857	St7	ENSMUSG00000029534	1036.41	-0.215778	0.0671116	-3.12037	0.00180623	0.0100086	St7	protein_coding	ENSMUSG00000029534	885.412	-0.288163	0.0732881	-3.77228	0.000161763	0.00155104	St7	protein_coding
chr6	56875460	56876180	1.46743	0.169541	-3.11359	ENSMUST00000031793	-1535	Nt5c3	ENSMUSG00000029780	1857.57	-0.217459	0.0750066	-2.89503	0.00379119	0.0183454	Nt5c3	protein_coding	ENSMUSG00000029780	1808.2	-0.321836	0.0774362	-3.99796	6.38902e-05	0.000725478	Nt5c3	protein_coding
chr6	65088428	65089002	1.03583	0.508622	-1.02613	ENSMUST00000170252	-164	Hpgds	ENSMUSG00000029919	420.073	-0.409754	0.0975527	-4.08949	4.32326e-05	0.000436344	Hpgds	protein_coding	ENSMUSG00000029919	514.26	-0.41941	0.107402	-3.61038	0.000305749	0.00262273	Hpgds	protein_coding
chr6	119775968	119776392	0.949513	0.508622	-0.900594	ENSMUST00000032279	-725	Erc1	ENSMUSG00000030172	8605.66	-0.193448	0.0748494	-2.54517	0.0109223	0.0425568	Erc1	protein_coding	ENSMUSG00000030172	6140.85	-0.226132	0.0719397	-2.8207	0.00479185	0.0239189	Erc1	protein_coding
chr6	125448327	125448900	1.20847	0.169541	-2.83348	ENSMUST00000032492	-3519	Cd9	ENSMUSG00000030342	1892.39	-0.300255	0.0827957	-3.65199	0.000260211	0.00202481	Cd9	protein_coding	ENSMUSG00000030342	2617.6	-0.263522	0.0714647	-3.49339	0.000476923	0.00375696	Cd9	protein_coding
[truncated: 66 more rows]

## Sheet: F-AcH3 AcH4 depleted - RNAseq
ChIP-seq									RNA-seq cortex									RNA-seq striatum
[truncated: 23 more rows]

## Sheet: G-AcH3 AcH4 dep RNAseq Sp1 targ
ChIP-seq									RNA-seq cortex									RNA-seq striatum
[truncated: 12 more rows]
