# Supplementary material for: HAT cofactor TRRAP modulates microtubule dynamics via SP1 signaling to prevent neurodegeneration
Source: eLife. 2021 Feb 17;10:e61531. doi: 10.7554/eLife.61531 (PMC7939550; doi:10.7554/eLife.61531)
Supplement: Supplementary file 6. — The table provides the results of the read mapping and assignment steps performed using MultiQC (version 1.6) (Ewels et al., 2016). [file elife-61531-supp6.xlsx]

## Sheet: MultiQC statistics
Sample	GEO Sample ID	GEO Series ID	Genotype	number of input reads	duplicated reads [%]	GC content [%]	uniquely mapped reads	uniquely mapped reads [%]	assigned reads	assigned reads [%]
19	GSM3767735	GSE131213	Trrap Fl/+;CreER Tg	38079436	70.4338	51	30604861	80.37	28383523	76.6041
19_OHT	GSM3767740	GSE131213	Trrap Fl/+;CreER Tg	37545316	65.0338	50	30908265	82.32	28818244	78.4535
24	GSM3767736	GSE131213	Trrap Fl/+;CreER Tg	39090840	69.2807	51	31671130	81.02	29500472	77.395
24_OHT	GSM3767741	GSE131213	Trrap Fl/+;CreER Tg	41685291	66.8897	51	34495575	82.75	32187097	79.1871
26	GSM3767737	GSE131213	Trrap Fl/+;CreER Tg	38348940	69.2826	51	31598121	82.4	29683741	79.1561
26_OHT	GSM3767742	GSE131213	Trrap Fl/+;CreER Tg	33167184	65.1449	51	27494537	82.9	25720034	79.5095
27_OHT	GSM3767743	GSE131213	Trrap Fl/Fl;CreER Tg	39045314	66.5816	51	32819767	84.06	30664209	80.2164
28_OHT	GSM3767744	GSE131213	Trrap Fl/Fl;CreER Tg	35574715	64.1768	51	30010905	84.36	28172988	80.8404
29_OHT	GSM3767745	GSE131213	Trrap Fl/Fl;CreER Tg	37355652	64.558	51	31286575	83.75	28838158	78.9154
35	GSM3767738	GSE131213	Trrap Fl/+;CreER Tg	37075035	68.2756	50	29892341	80.63	27693657	76.4733
35_OHT	GSM3767746	GSE131213	Trrap Fl/+;CreER Tg	37094386	66.2872	50	30819181	83.08	28746203	79.2206
36	GSM3767739	GSE131213	Trrap Fl/+;CreER Tg	36050006	67.2106	50	29721781	82.45	27993504	79.237
36_OHT	GSM3767747	GSE131213	Trrap Fl/+;CreER Tg	36165354	66.4038	50	29819208	82.45	27907207	78.8377
37_OHT	GSM3767748	GSE131213	Trrap Fl/Fl;CreER Tg	32246491	63.6604	51	27275237	84.58	25749979	81.5473
39_OHT	GSM3767749	GSE131213	Trrap Fl/Fl;CreER Tg	35352718	64.8942	51	29829053	84.38	28155957	81.3117
P10_55_Ctx	GSM3768722	GSE131283	Trrap Fl/+;CamK-Cre Tg	38744488	63.8225	47	33458009	86.36	28743866	75.3731
P10_57_Ctx	GSM3768723	GSE131283	Trrap Fl/Fl;CamK-Cre Tg	57804489	67.1176	47	49865743	86.27	42915968	75.4549
P10_57_Str	GSM3768724	GSE131283	Trrap Fl/Fl;CamK-Cre Tg	58745291	65.9088	47	51000328	86.82	43210858	74.7743
P10_58_Ctx	GSM3768725	GSE131283	Trrap Fl/+;CamK-Cre Tg	60300933	65.9738	47	51988620	86.22	44708575	75.57
P10_58_Str	GSM3768726	GSE131283	Trrap Fl/+;CamK-Cre Tg	43177515	64.0402	47	37226621	86.22	31735896	74.7984
P10_59_Ctx	GSM3768727	GSE131283	Trrap Fl/Fl;CamK-Cre Tg	49517219	64.1613	47	43289172	87.42	36720701	75.3637
P10_59_Str	GSM3768728	GSE131283	Trrap Fl/Fl;CamK-Cre Tg	51104097	63.827	47	44085917	86.27	37139161	74.0493
P10_60_Ctx	GSM3768729	GSE131283	Trrap Fl/Fl;CamK-Cre Tg	52612344	63.7422	47	45629398	86.73	38786164	75.0634
P10_60_Str	GSM3768730	GSE131283	Trrap Fl/Fl;CamK-Cre Tg	63567620	66.0189	47	54977790	86.49	46174131	73.8758
P10_61_Ctx	GSM3768731	GSE131283	Trrap Fl/Fl;CamK-Cre Tg	64830859	65.8746	48	56887666	87.75	48761429	76.371
P10_61_Str	GSM3768732	GSE131283	Trrap Fl/Fl;CamK-Cre Tg	64648816	66.5183	47	56144297	86.85	47612379	74.8583
P10_63_Ctx	GSM3768733	GSE131283	Trrap Fl/+;CamK-Cre Tg	55285814	66.6232	47	47632291	86.16	41256264	75.8408
P10_63_Str	GSM3768734	GSE131283	Trrap Fl/+;CamK-Cre Tg	57942936	64.8188	47	48751668	84.14	40844279	71.9312
P10_64_Ctx	GSM3768735	GSE131283	Trrap Fl/+;CamK-Cre Tg	55497368	66.9198	47	48171722	86.8	41707956	76.4595
P10_64_Str	GSM3768736	GSE131283	Trrap Fl/+;CamK-Cre Tg	51205508	65.0383	47	44063463	86.05	37650497	74.7879
P10_65_Str	GSM3768737	GSE131283	Trrap Fl/+;CamK-Cre Tg	59902471	67.6004	46	51522968	86.01	43897446	74.5226
